# Supplementary material for: Rediscovering Bacon's hydrazine/phenylhydrazine mediated cyclization of 2,2′-dicarbonylbi(hetero)aryls: construction of (5-azo)-/indazolo[2,3-a]quinolines
Source: Royal Society of Chemistry journal article supplement (doi:10.1039/d1ob02207e), 2021-12-17

## Electronic Supplementary Information

Rediscovering the Bacon's Hydrazine/Phenylhydrazine Mediated Cyclization of 2,2'-Dicarbonylbi(hetero)aryls: Construction of (5-Azo)-/Indazolo[2,3-*a*]quinolines.

Pawan S. Dhote,<sup>ab</sup> Chepuri V. Ramana<sup>ab\*</sup>

<sup>a</sup>*Division of Organic Chemistry, CSIR-National Chemical Laboratory, Dr. Homi Bhabha Road, Pune 411 008, India.*

<sup>b</sup>*Academy of Scientific and Innovative Research (AcSIR), Ghaziabad-201002, India.*

### Contents

|   |                                                                                                           |   |         |
|---|-----------------------------------------------------------------------------------------------------------|---|---------|
| 1 | Crystal parameters for compound <b>3aa</b> , <b>6bb</b> , and <b>10</b>                                   | : | S2–S3   |
| 2 | <sup>1</sup> H NMR, <sup>13</sup> C{ <sup>1</sup> H} NMR, DEPT NMR, and HRMS spectra of all new compounds | : | S4–S223 |

## Crystal Parameters for compound 3aa, 6bb and 10

### Diffraction Studies:

Single crystal data of **3aa**, **6bb** and **10** crystal was collected on Bruker SMART APEX II single crystal X-ray CCD diffractometer having graphite-monochromatized (Cu-K $\alpha$  = 1.54178 Å) radiation at 100 K. The X-ray data acquisition was monitored by APEX2 program suit.<sup>1</sup> The data were corrected for Lorentz-polarization and absorption effects using SAINT and SADABS programs which are integral part of APEX2 package.<sup>1</sup> The structures were solved by direct methods and refined by full matrix least squares, based on  $F^2$ , using SHELXL<sup>2</sup>. Crystal structures were refined using Olex2 1.0 software.<sup>3</sup> PLATON<sup>4</sup> was used to check the any higher symmetry of crystal, and Mercury software was utilized for molecular representations in ORTEP diagrams. Refinement of coordinates and anisotropic thermal parameters of non-hydrogen atoms were performed with the full-matrix least-squares method. The hydrogen atoms of CH were calculated using the riding model.

1. Bruker **2006**. *APEX2*, *SAIN*T and *SADABS*. Bruker AXS Inc., Madison, Wisconsin, USA.
2. Sheldrick, G. M. Structure validation in chemical crystallography *Acta Cryst.* **2015**, *D65*, 148–155.
3. Dolomanov, O. V., Bourhis, L. J., Gildea, R. J., Howard, J. A. K.; Puschmann, H. A complete structure solution, refinement and analysis program *J. Appl. Cryst.* 2009, *42*, 339–341.
4. Spek, L. Crystal structure refinement with SHELXL *Acta. Cryst.* **2009**, *C71*, 3–8.

### Sample preparation for crystal growth:

The 10 mg compound was taken in 2 ml glass vial, 1 ml acetonitrile solvent was added and the *vail* was closed with the cotton plug. Kept it for slow evaporation at room temperature in a dark place untill the crystals are formed.

**Figure S1.** ORTEP diagram of **3aa**, **6bb**, **10** and Thermal ellipsoids are shown at the 50% probability level.

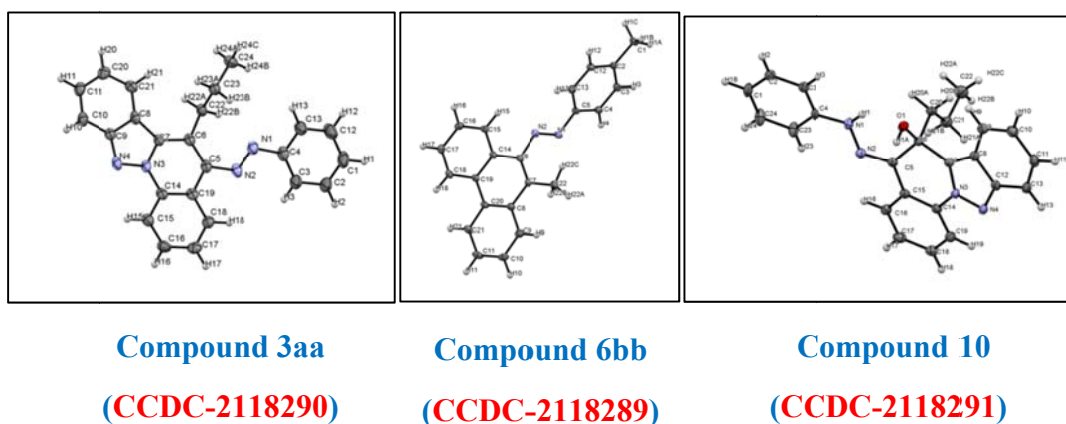

## Single crystal data:

| Parameters                                         | 3aa                                            | 6bb                                            | 10                                               |
|----------------------------------------------------|------------------------------------------------|------------------------------------------------|--------------------------------------------------|
| Empirical Formula                                  | C <sub>24</sub> H <sub>20</sub> N <sub>4</sub> | C <sub>22</sub> H <sub>18</sub> N <sub>2</sub> | C <sub>24</sub> H <sub>22</sub> N <sub>4</sub> O |
| Formula weight                                     | 364.44                                         | 310.38                                         | 382.45                                           |
| Crystal System                                     | Monoclinic                                     | Triclinic                                      | Monoclinic                                       |
| Space Group                                        | <i>P2<sub>1</sub>/n</i>                        | <i>P<sub>1</sub></i>                           | <i>C2/c</i>                                      |
| T (K)                                              | 100                                            | 100                                            | 100                                              |
| <i>a</i> (Å)                                       | 4.729 (6)                                      | 8.4314 (4)                                     | 11.4975 (6)                                      |
| <i>b</i> (Å)                                       | 36.33 (4)                                      | 9.1682 (4)                                     | 19.6301 (10)                                     |
| <i>c</i> (Å)                                       | 10.854 (16)                                    | 11.7324 (5)                                    | 17.6537 (9)                                      |
| $\alpha$ (°)                                       | 90                                             | 73.137 (1)                                     | 90                                               |
| $\beta$ (°)                                        | 93.66 (3)                                      | 89.952 (1)                                     | 99.469 (2)                                       |
| $\gamma$ (°)                                       | 90                                             | 67.155 (1)                                     | 90                                               |
| <i>V</i> (Å <sup>3</sup> )                         | 1861 (4)                                       | 793.39 (6)                                     | 3930.1 (4)                                       |
| <i>D</i> <sub>cal</sub> (g cm <sup>-3</sup> )      | 1.301                                          | 1.299                                          | 1.293                                            |
| <i>Z</i>                                           | 4                                              | 2                                              | 8                                                |
| <i>R</i> <sub>1</sub> [ <i>I</i> > 2σ( <i>I</i> )] | 0.097                                          | 0.041                                          | 0.040                                            |
| <i>R</i> <sub>int</sub>                            | 0.207                                          | 0.034                                          | 0.192                                            |
| w <i>R</i> <sub>2</sub> (all)                      | 0.238                                          | 0.1222                                         | 0.137                                            |
| Measured reflections                               | 45059                                          | 21699                                          | 26562                                            |
| Independent reflections                            | 3951                                           | 4072                                           | 4043                                             |
| Reflections with <i>I</i> > 2σ( <i>I</i> )         | 2617                                           | 3860                                           | 3670                                             |
| Goodness of fit (S)                                | 1.039                                          | 1.05                                           | 1.14                                             |
| X-ray Diffractometer                               | Bruker                                         | Bruker                                         | Bruker                                           |
| CCDC number                                        | 2118290                                        | 2118289                                        | 2118291                                          |

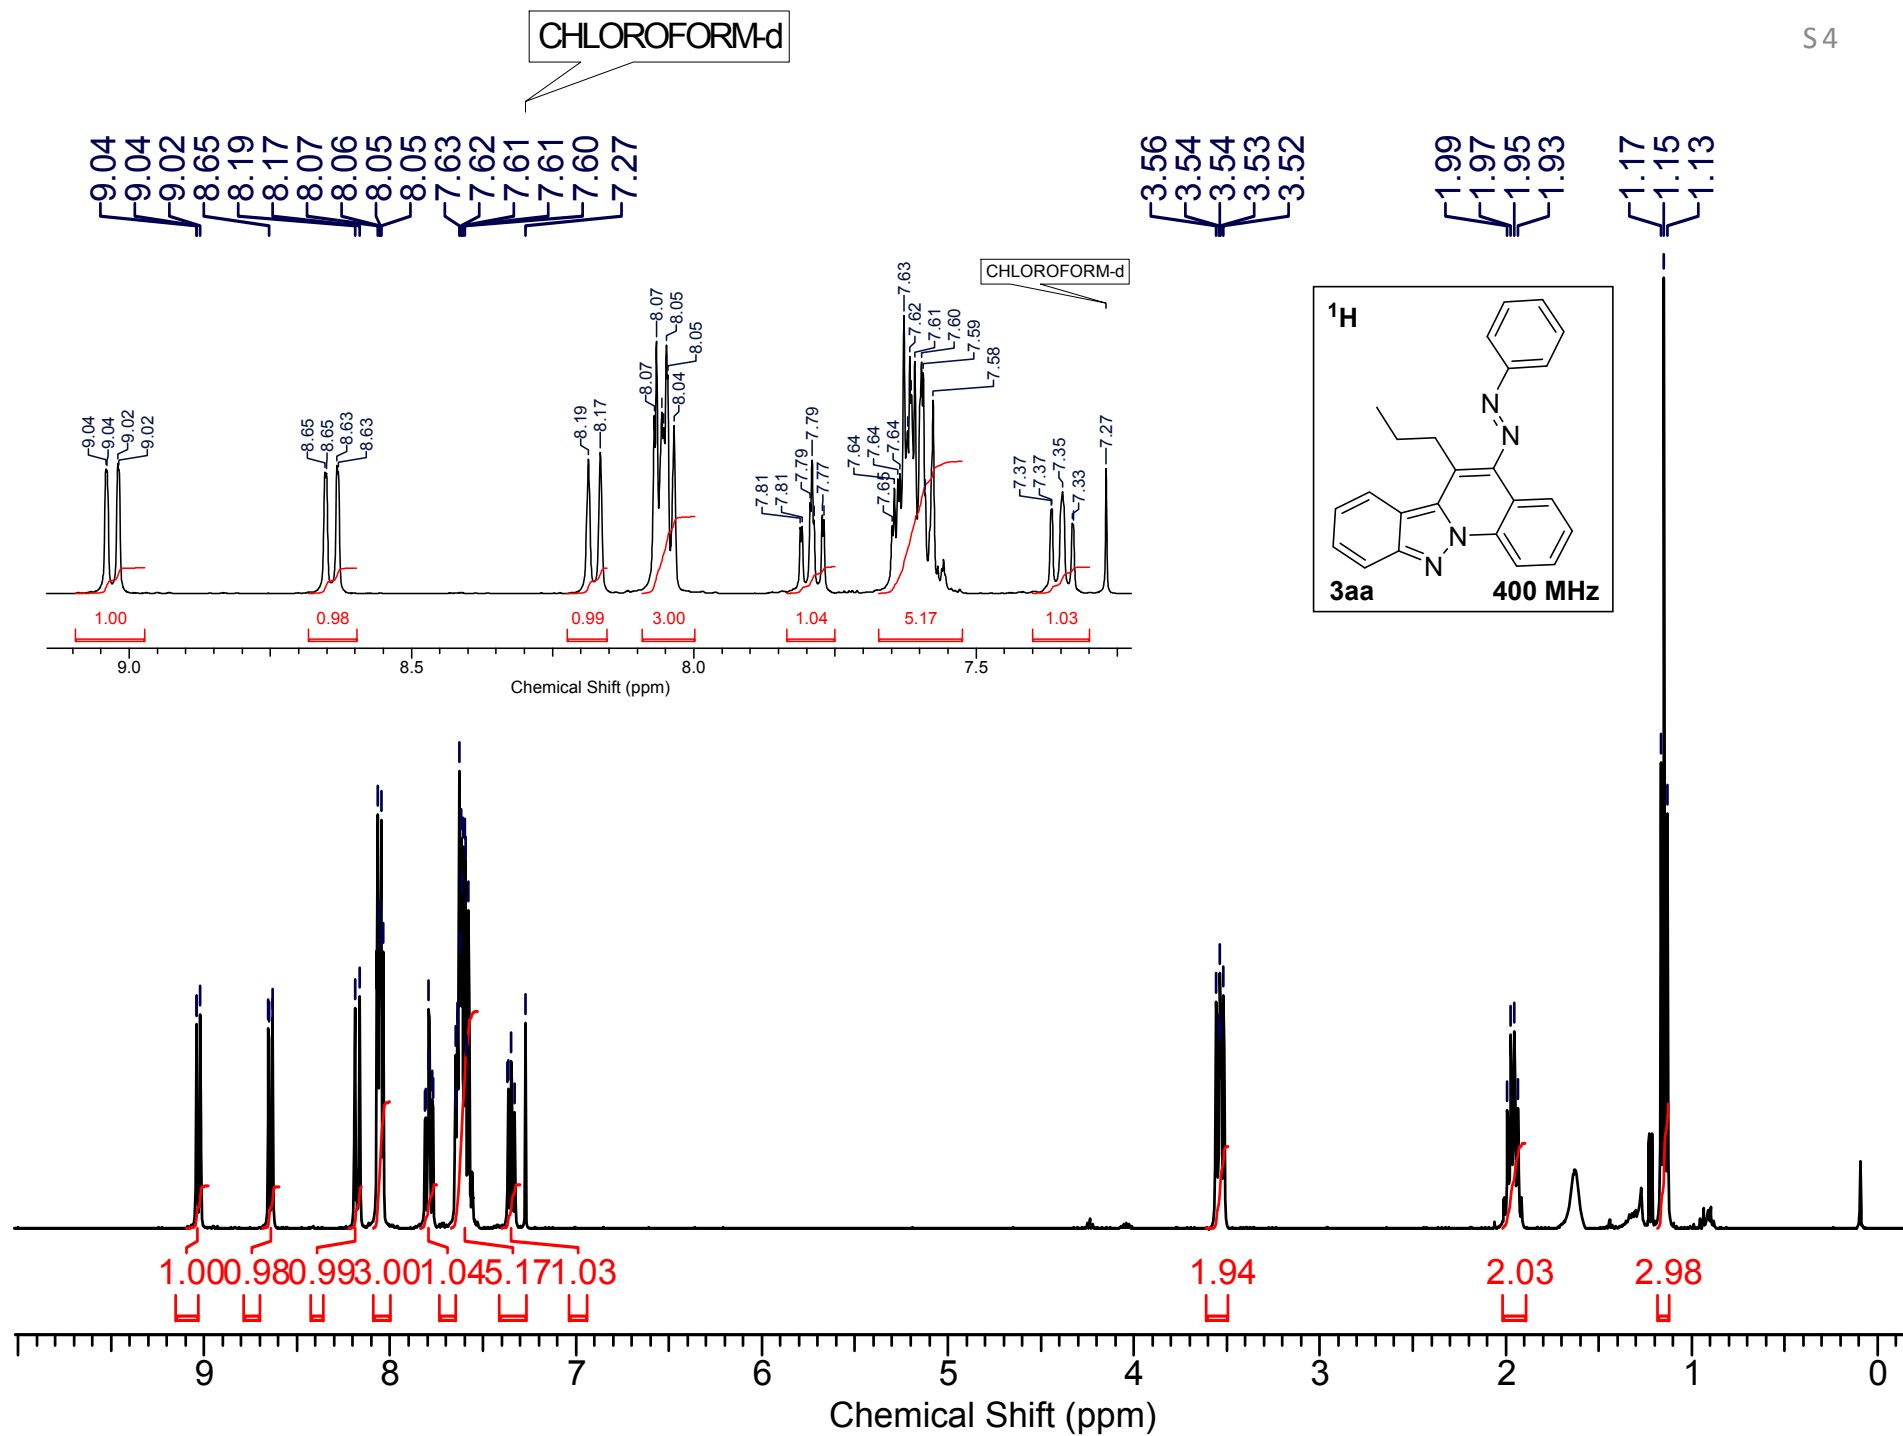

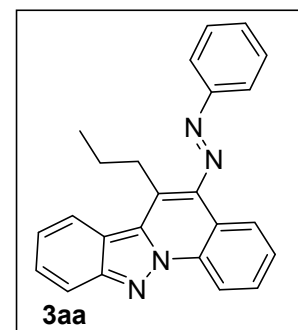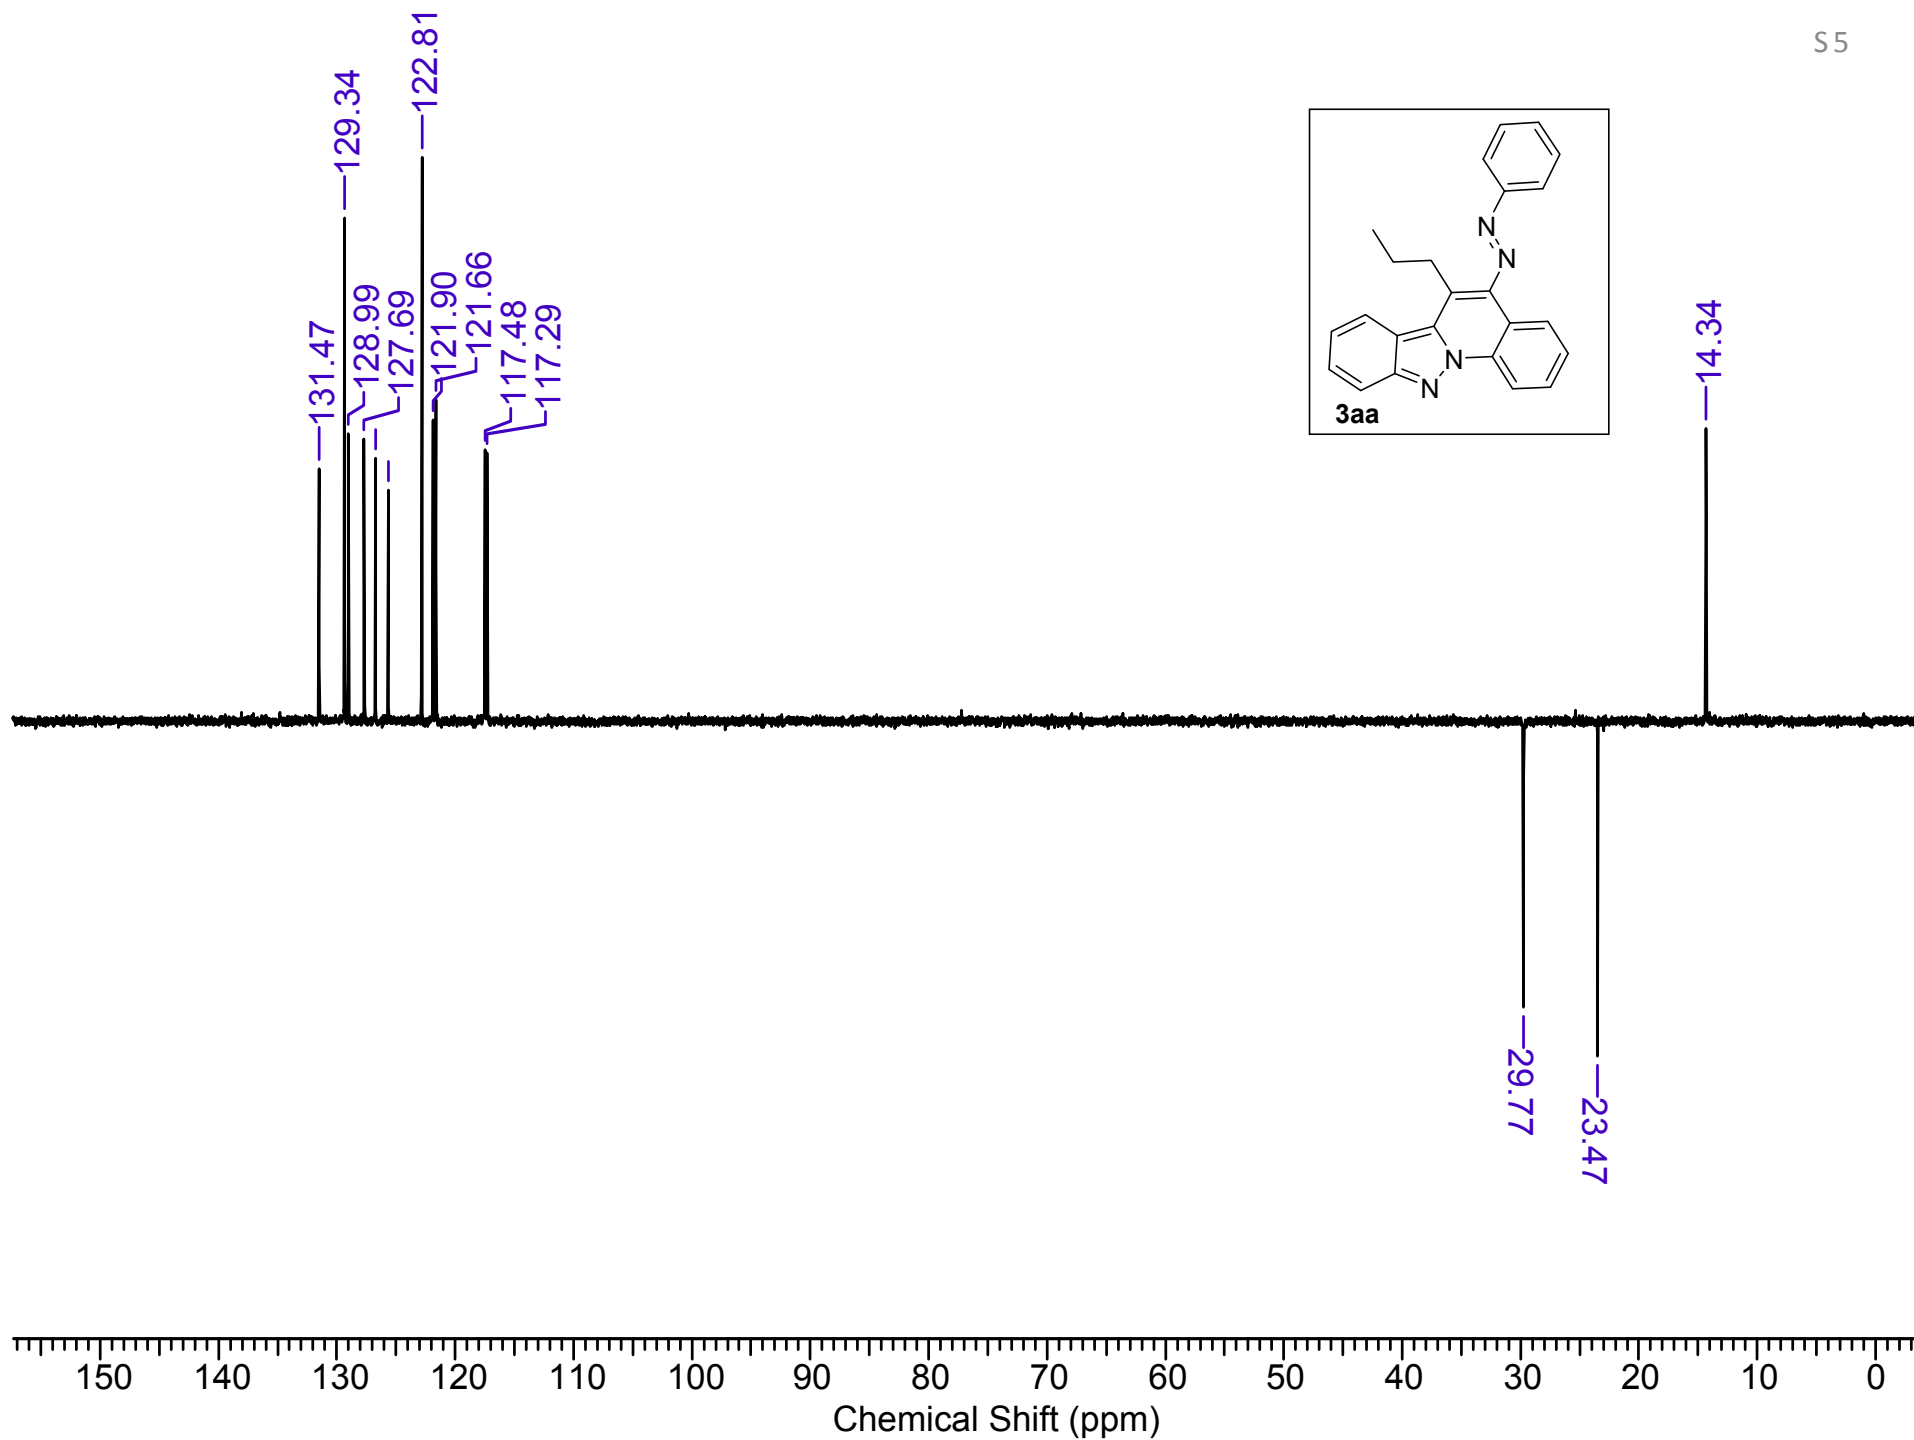

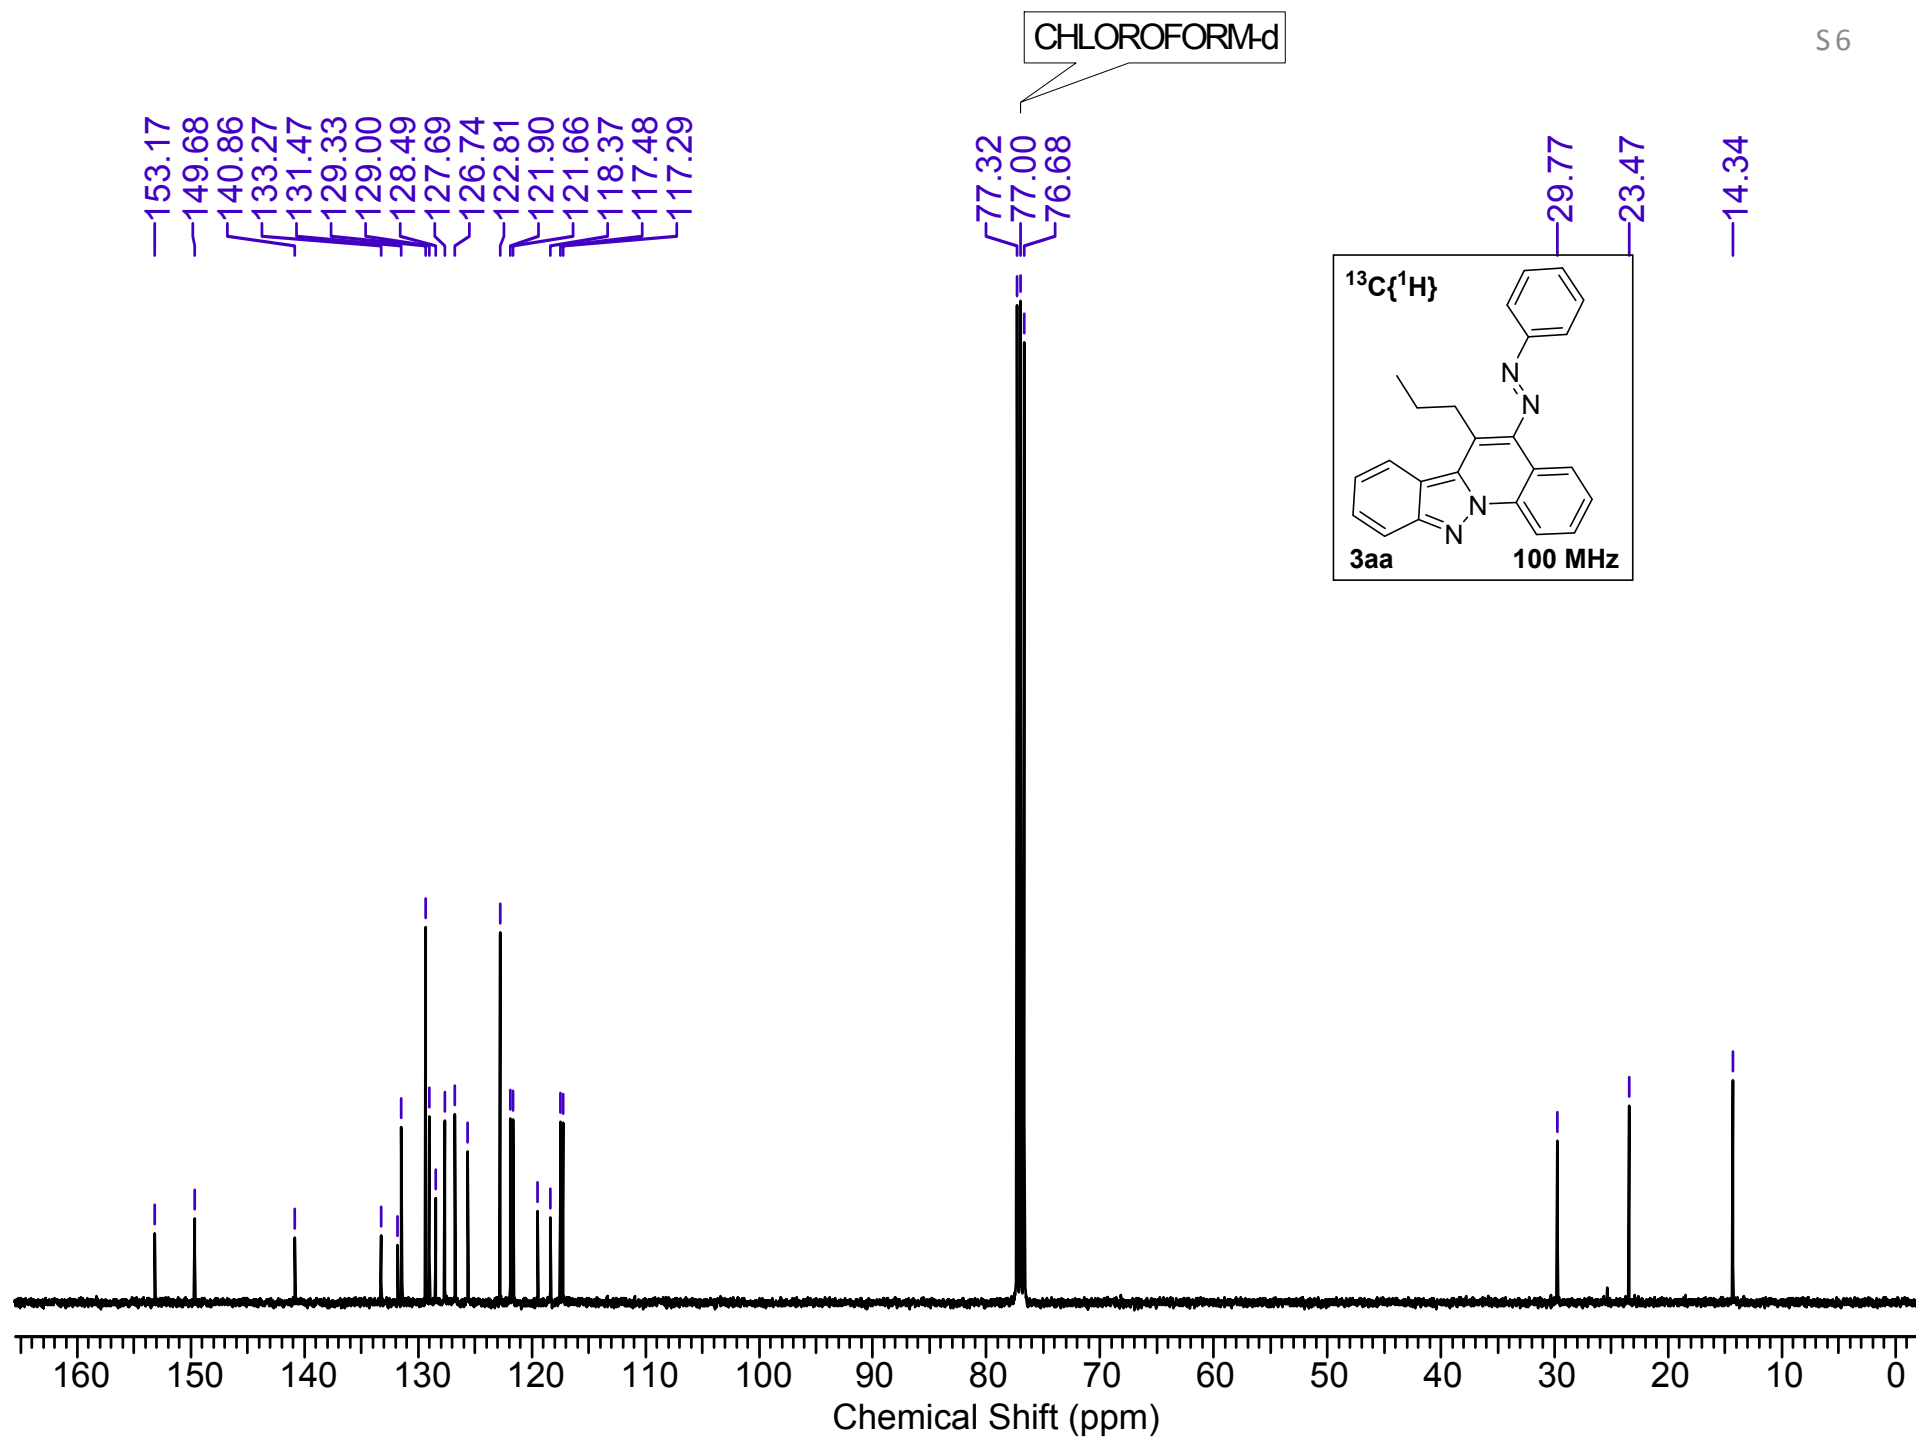

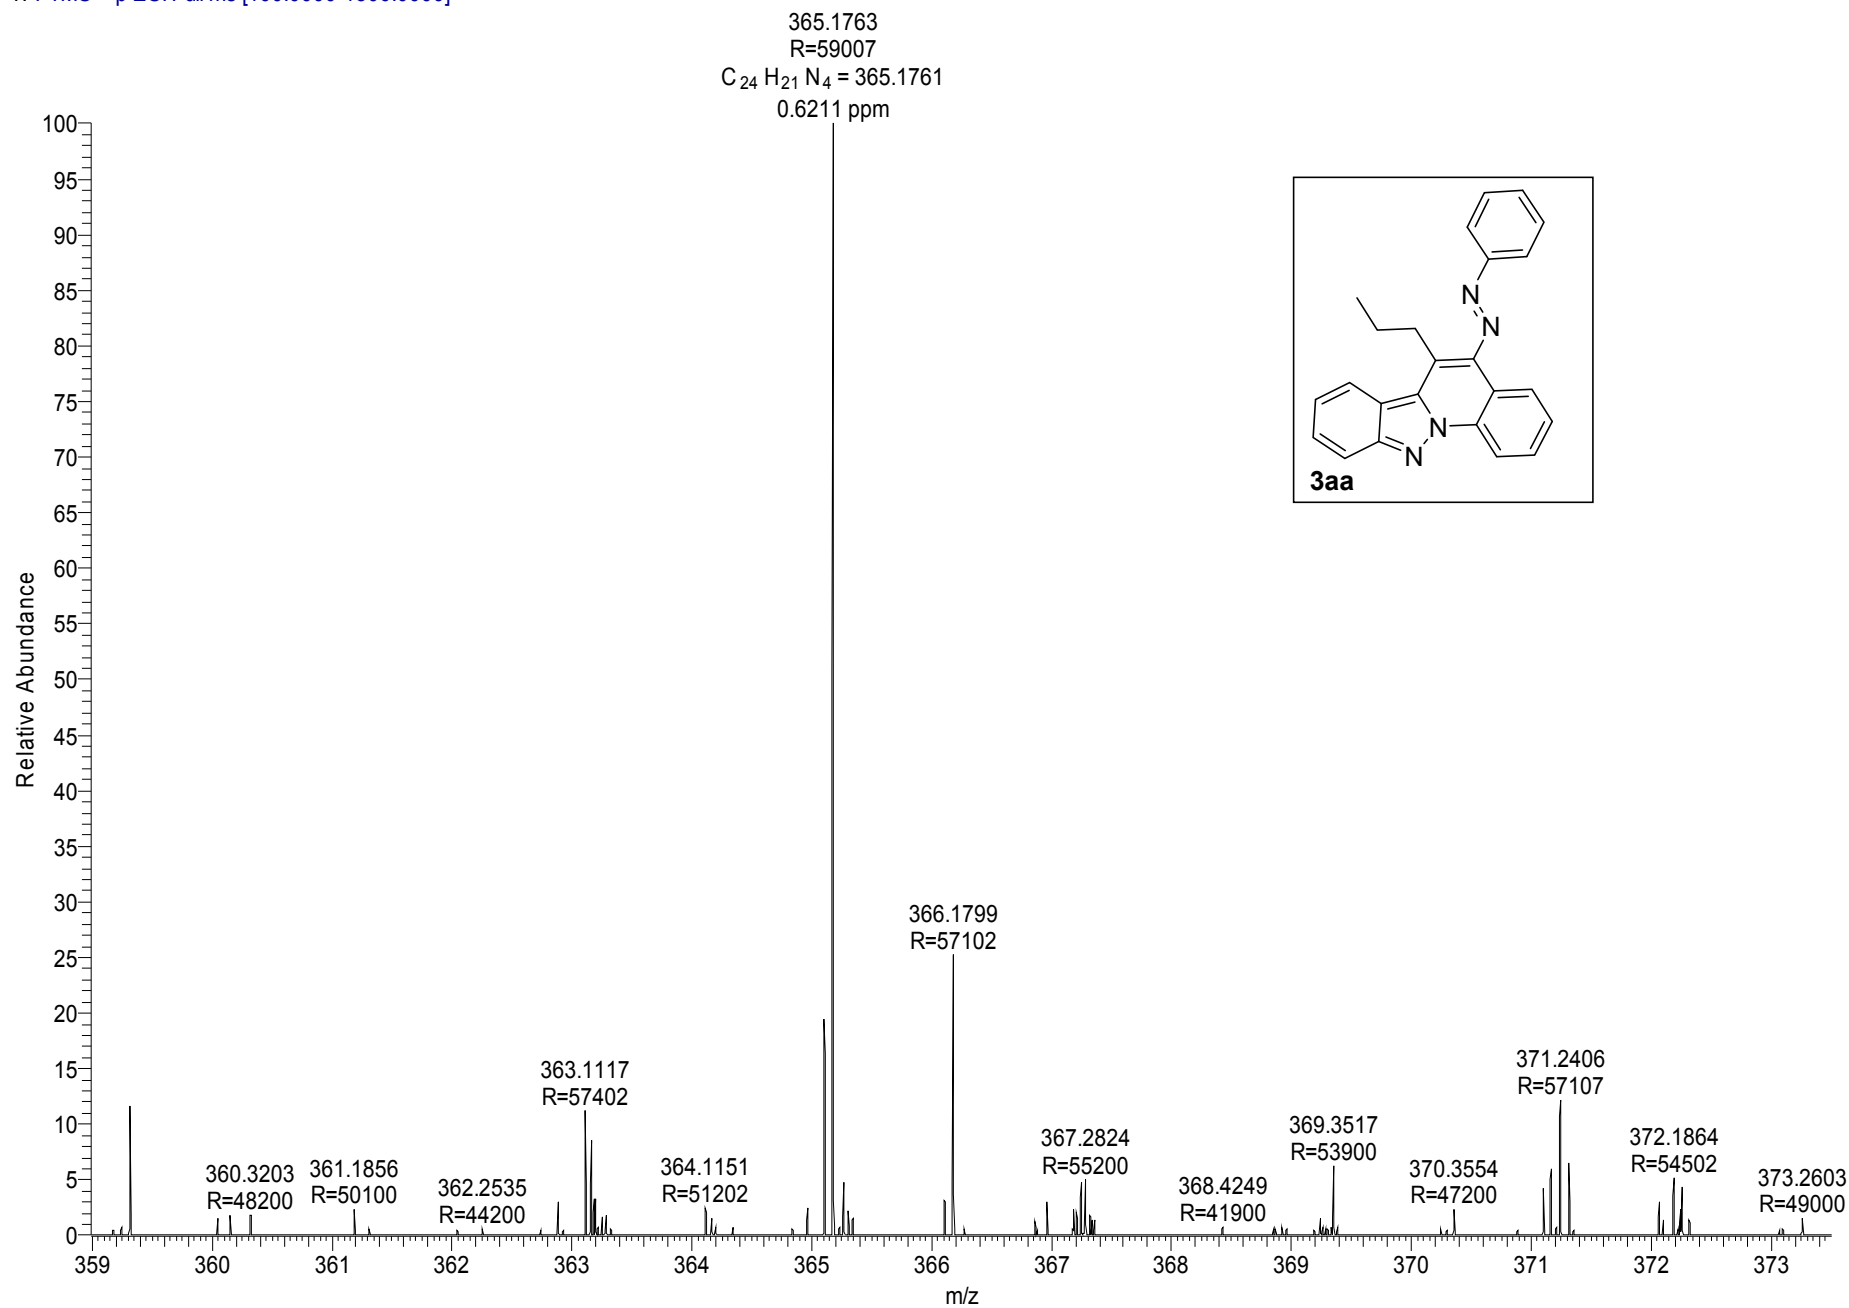

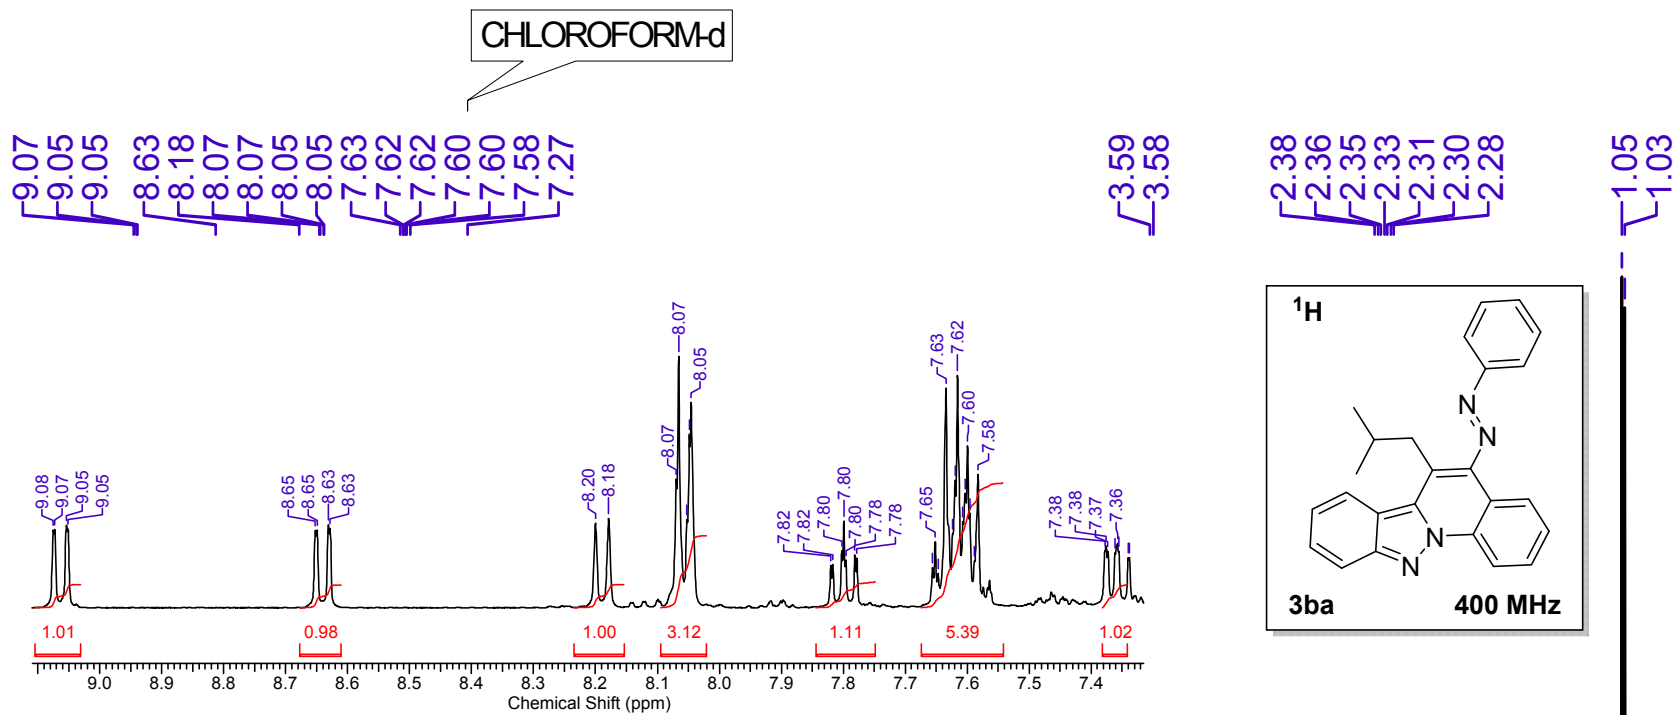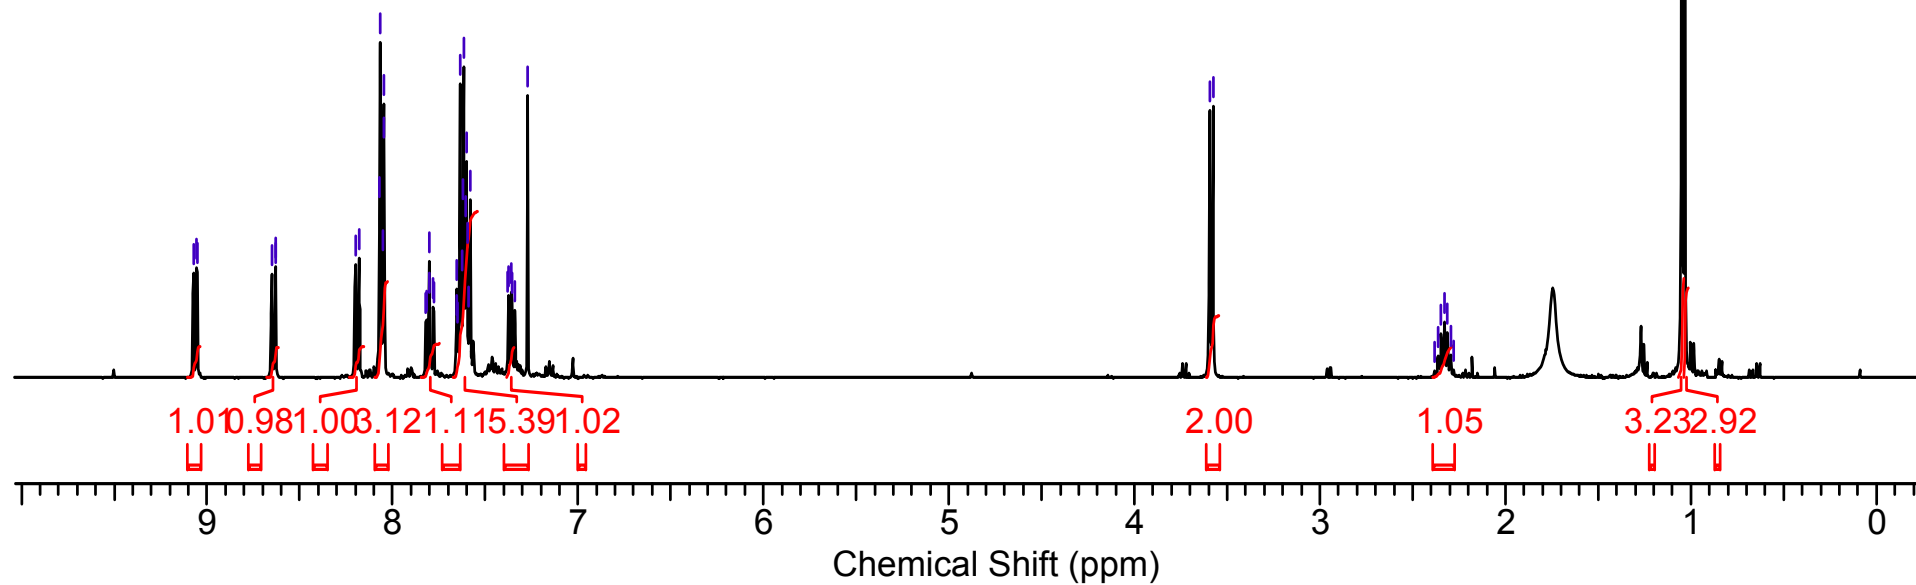



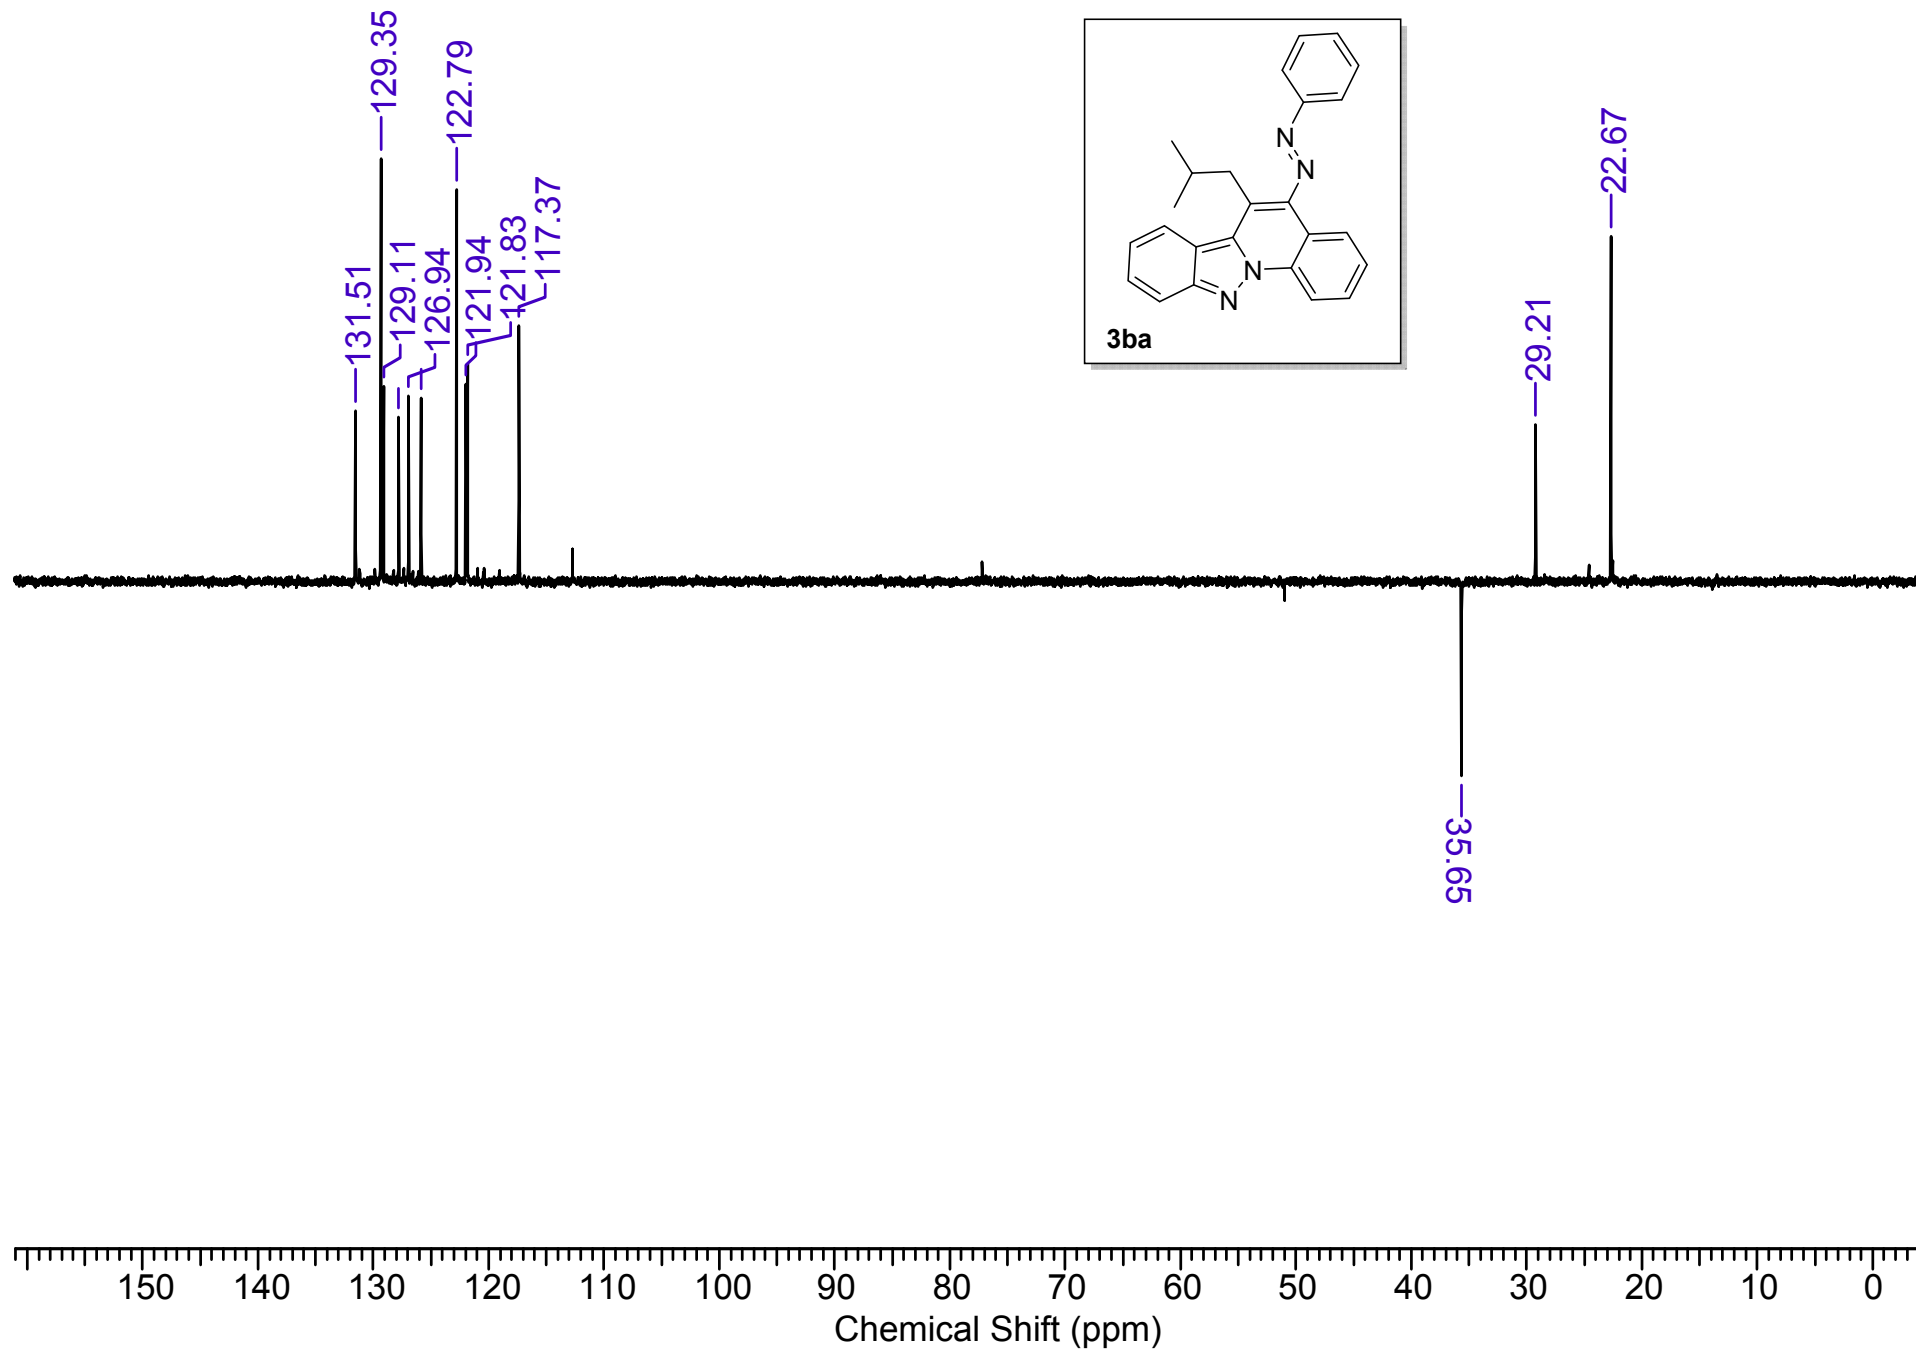

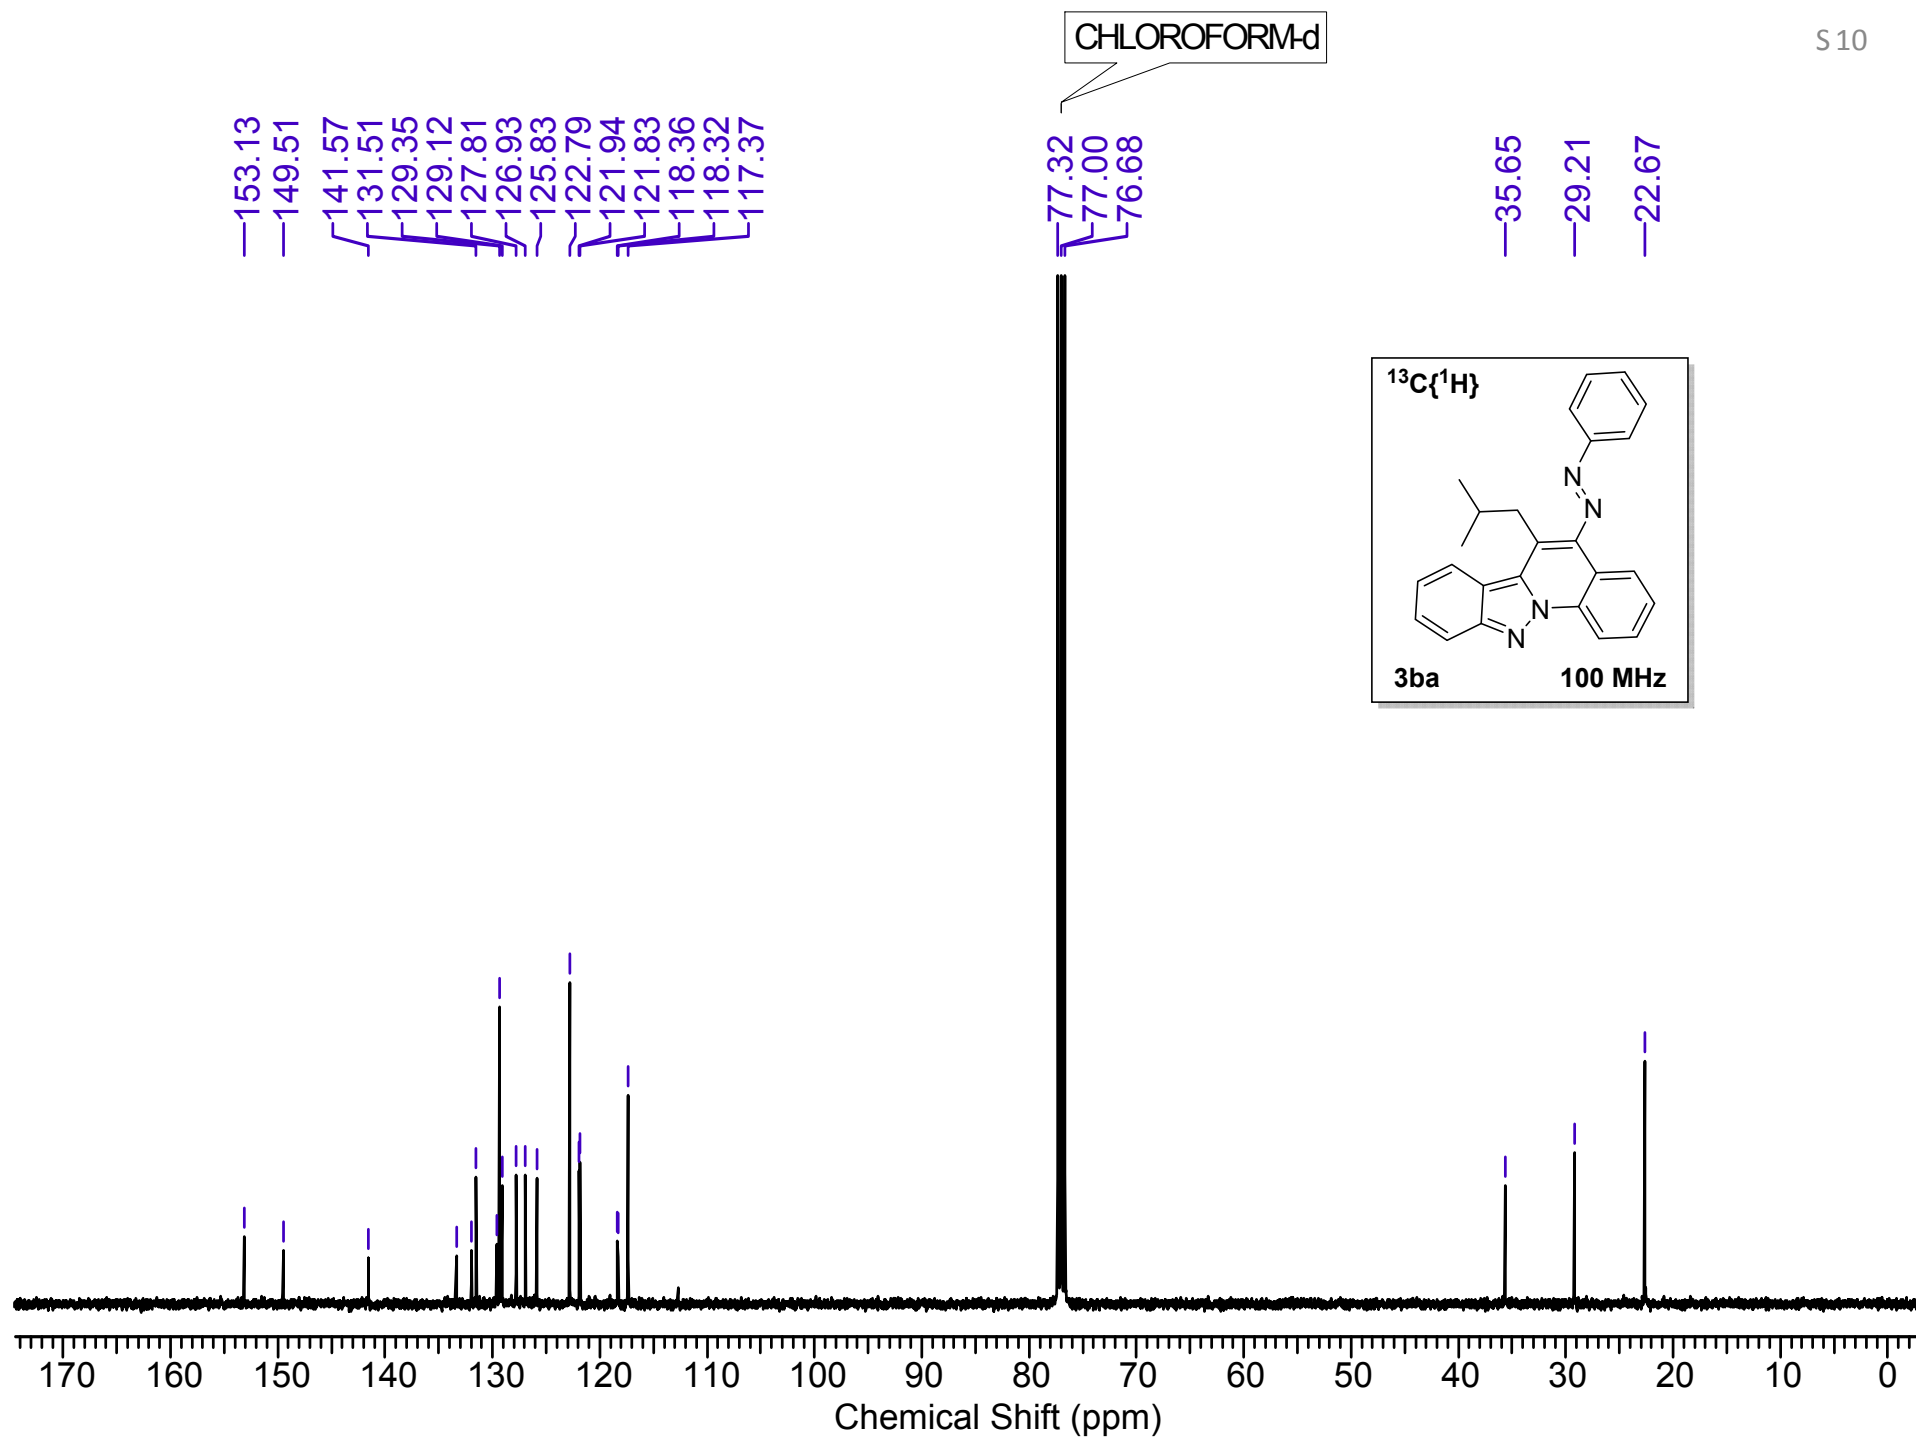

PSD-697 #891 RT: 4.78 AV: 1 NL: 2.28E8  
T: FTMS + p ESI Full ms [100.0000-1500.0000]

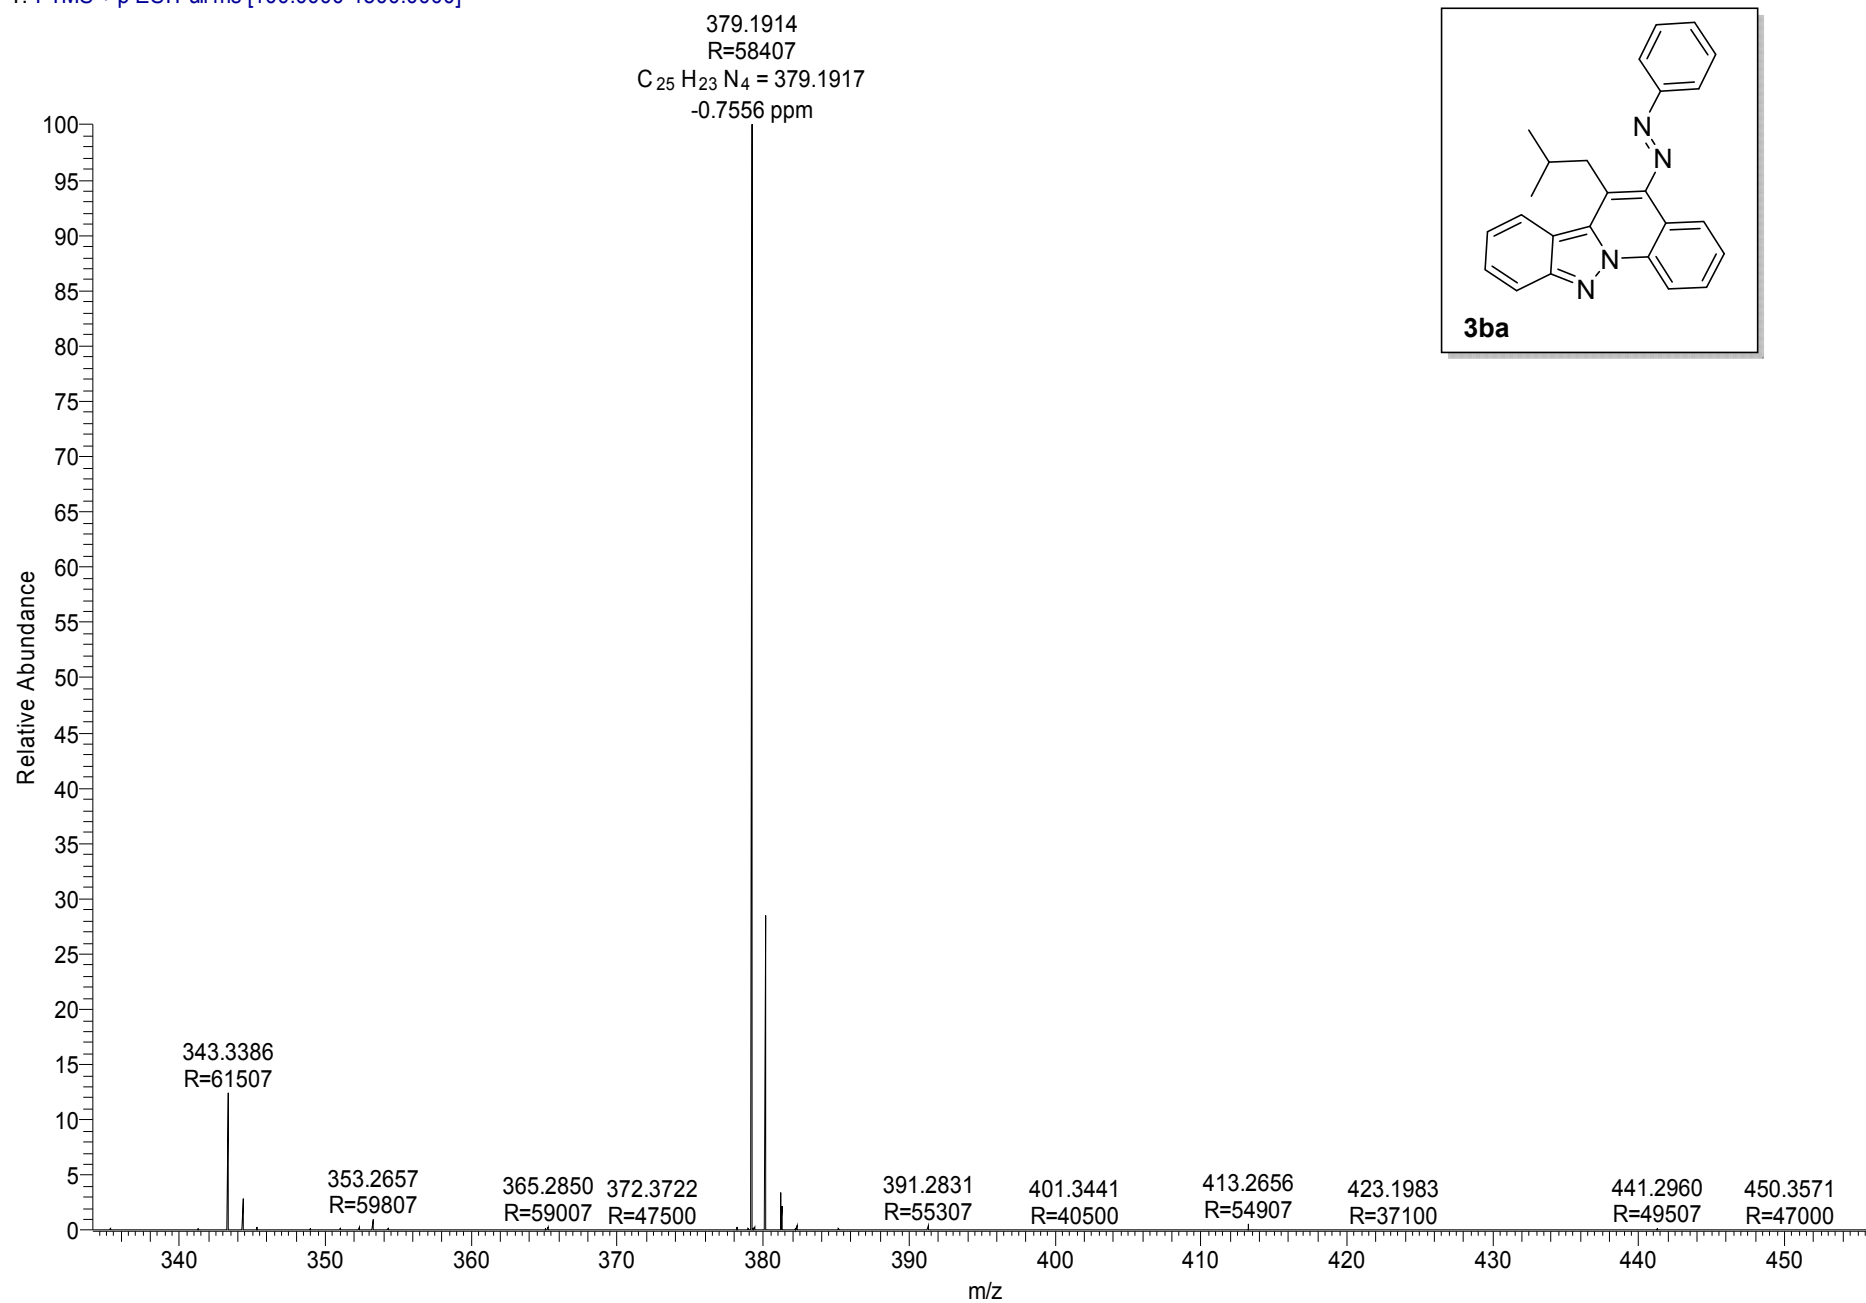

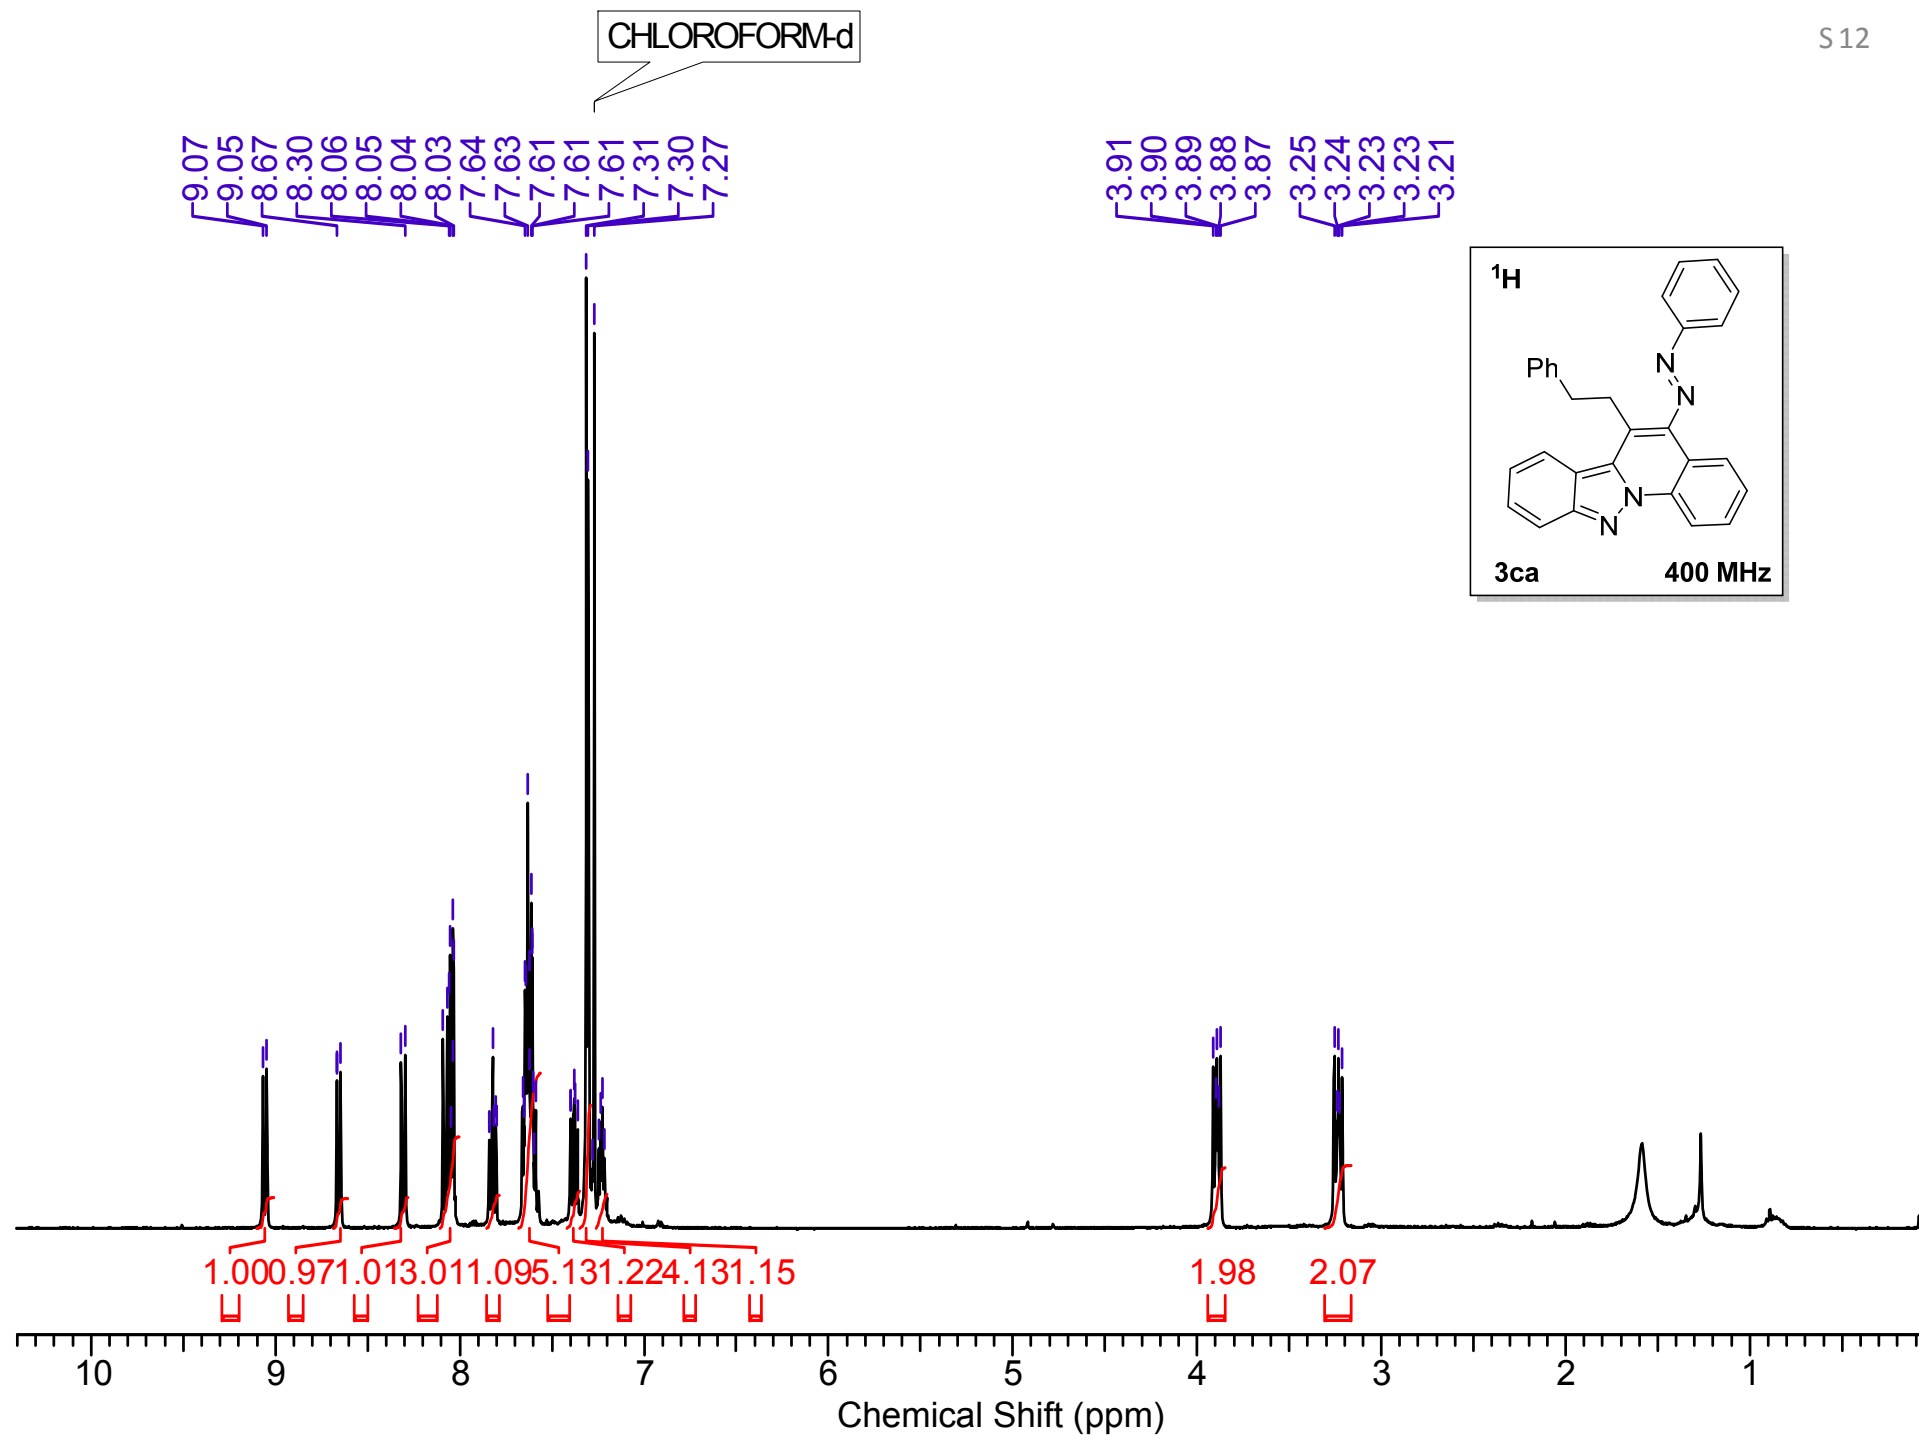

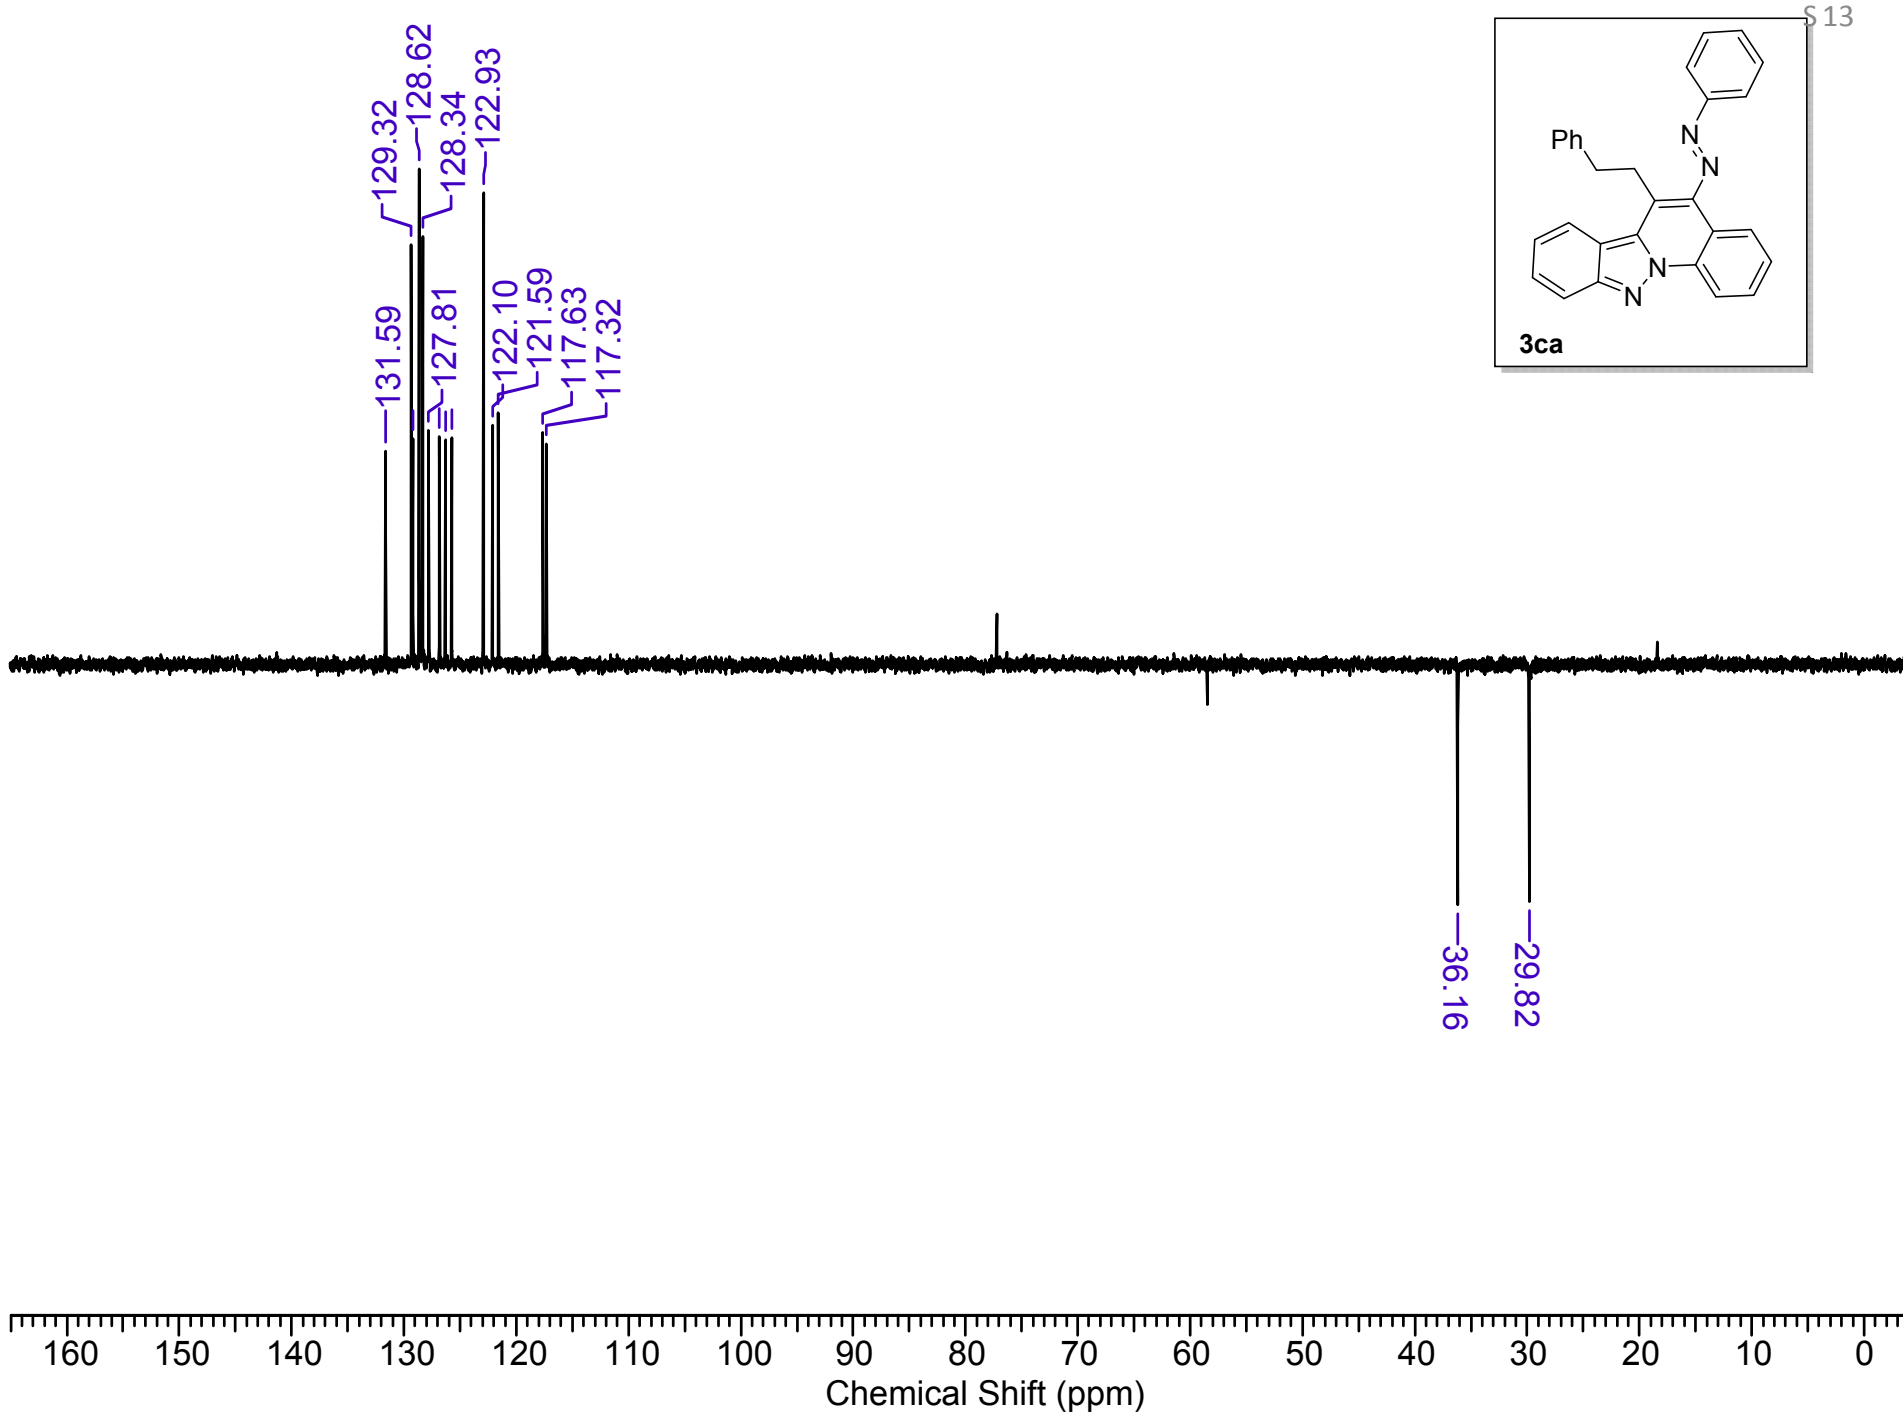

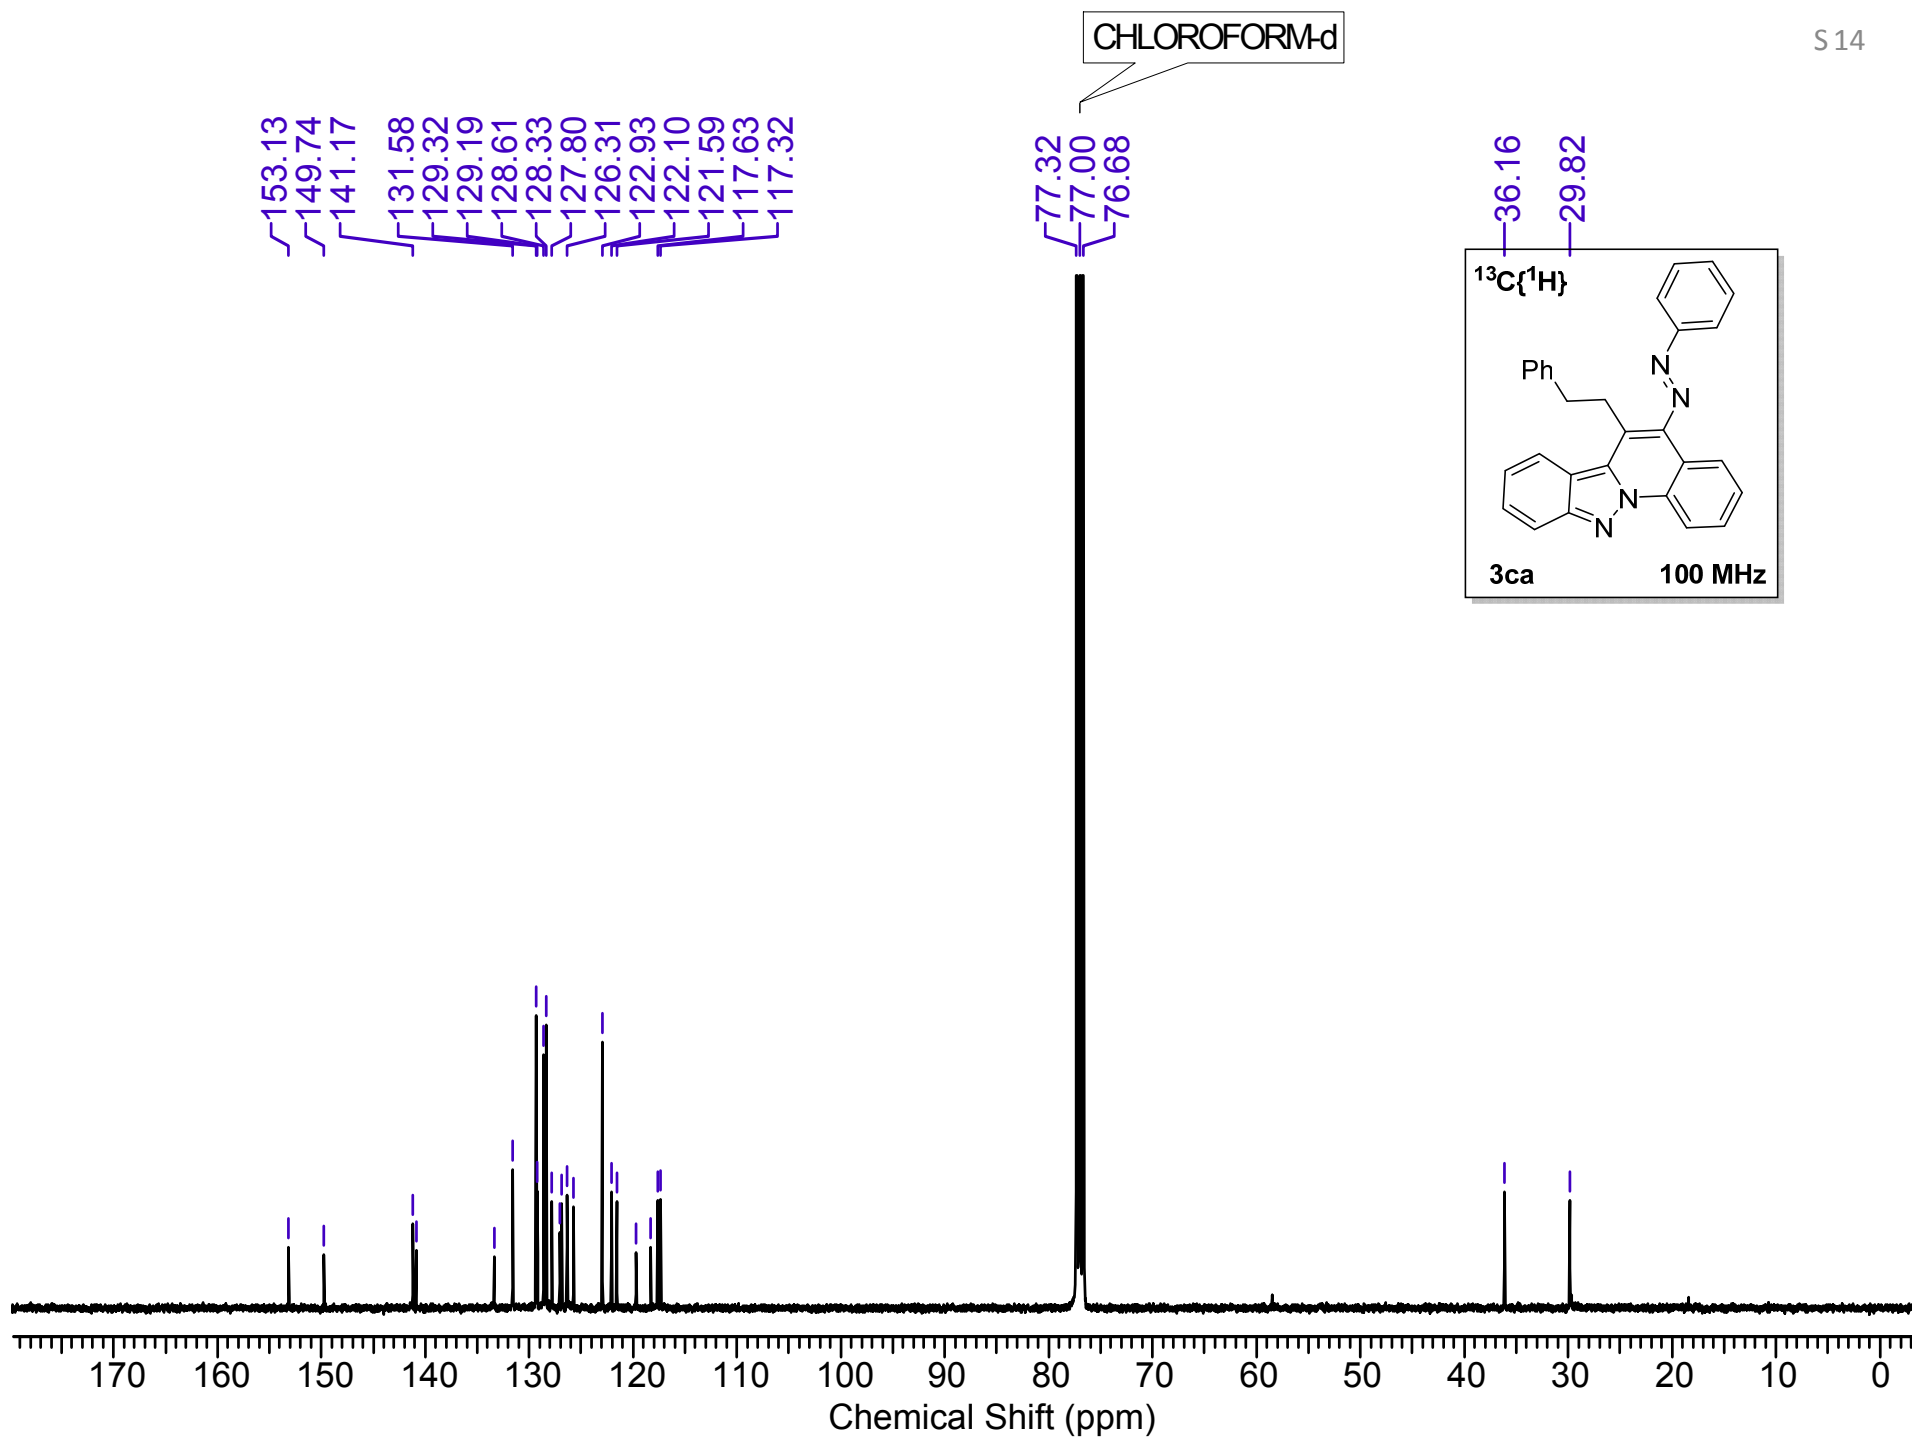

PD-689 #908 RT: 7.63 AV: 1 NL: 9.14E6  
T: FTMS + p ESI Full ms [100.0000-1500.0000]

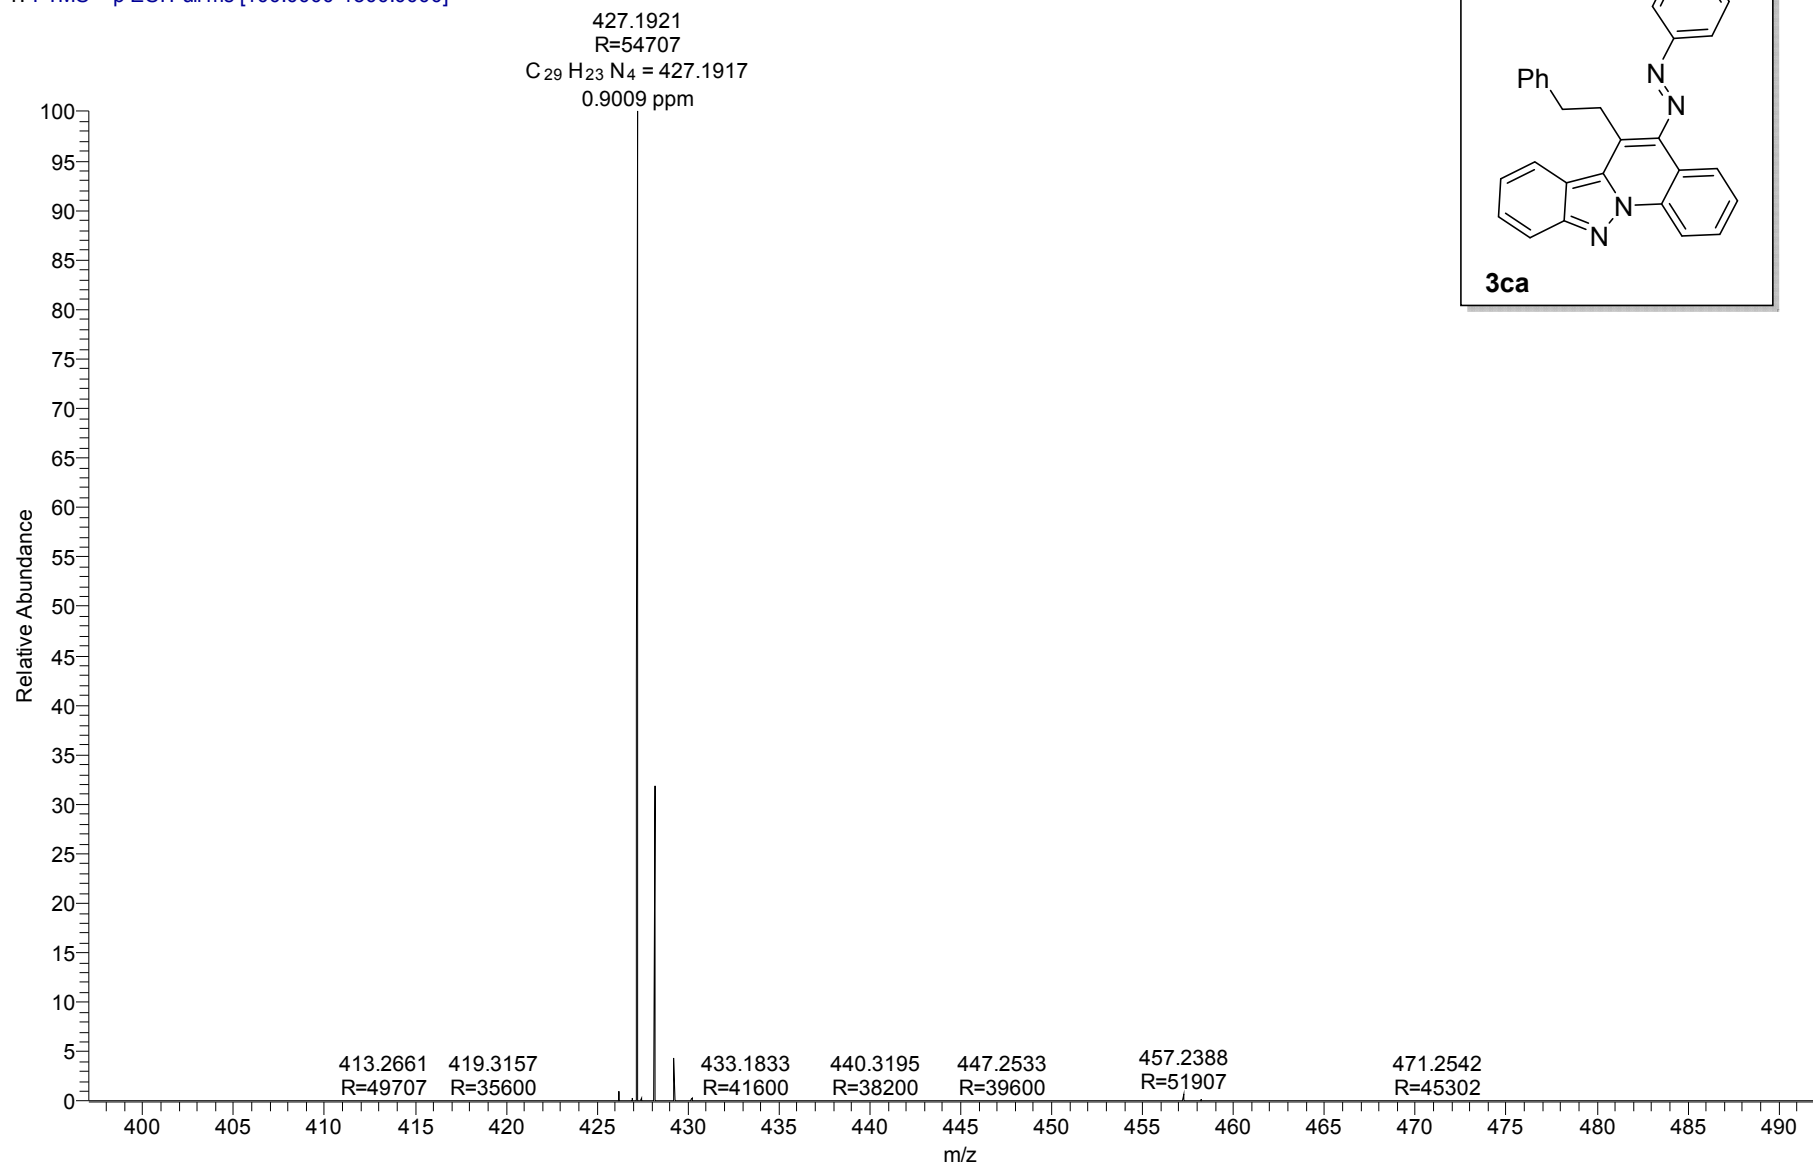

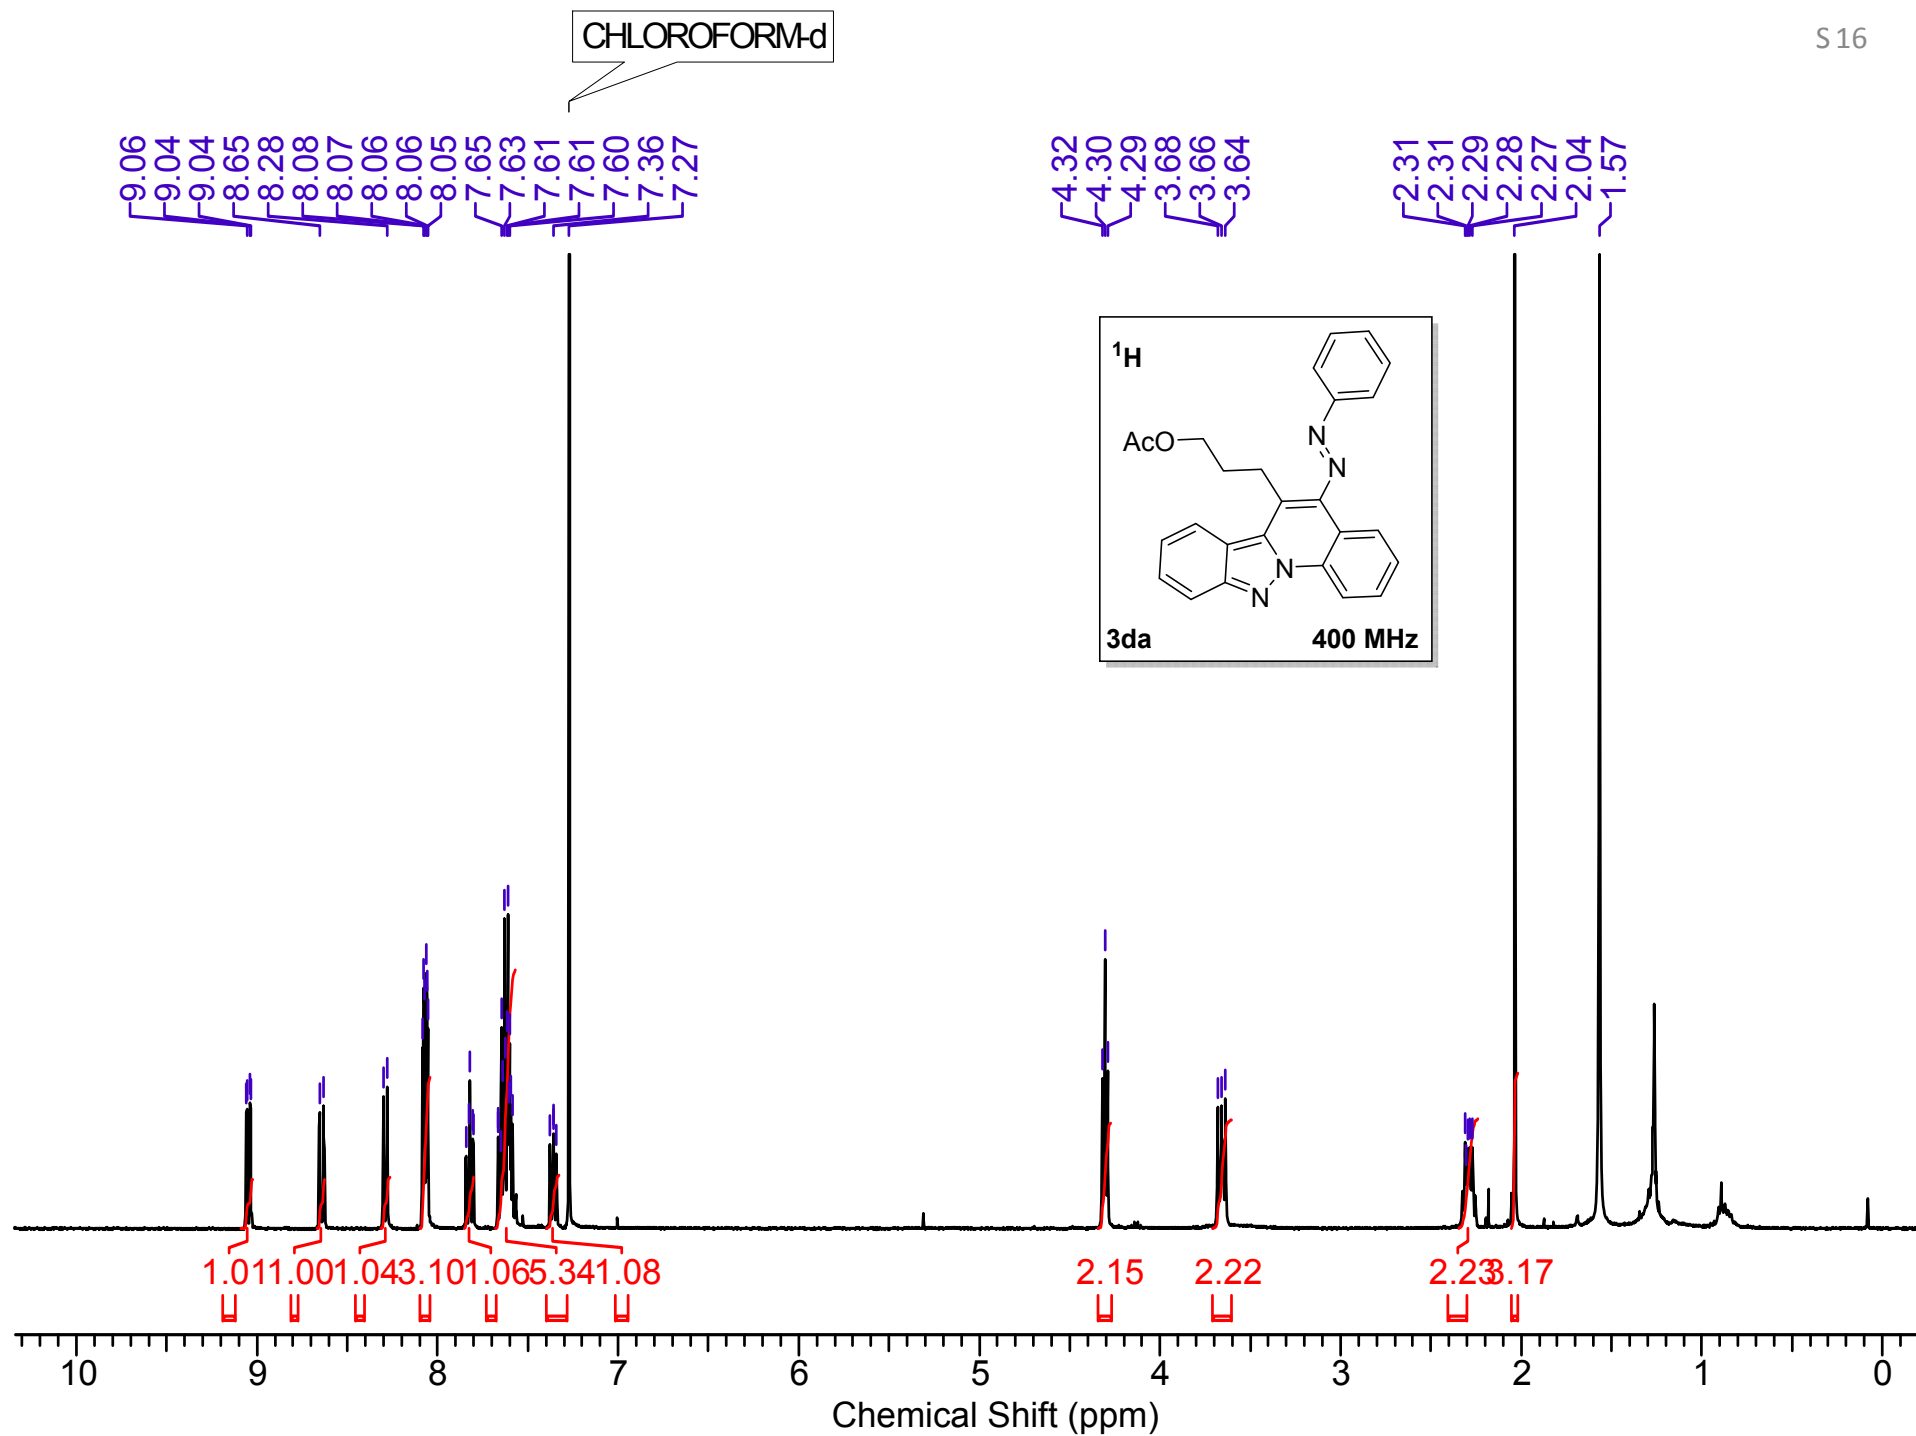



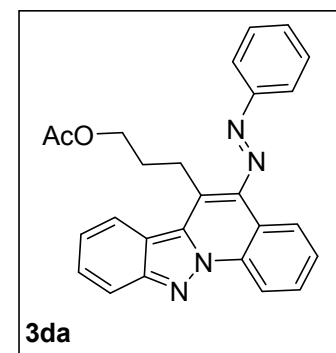

3da

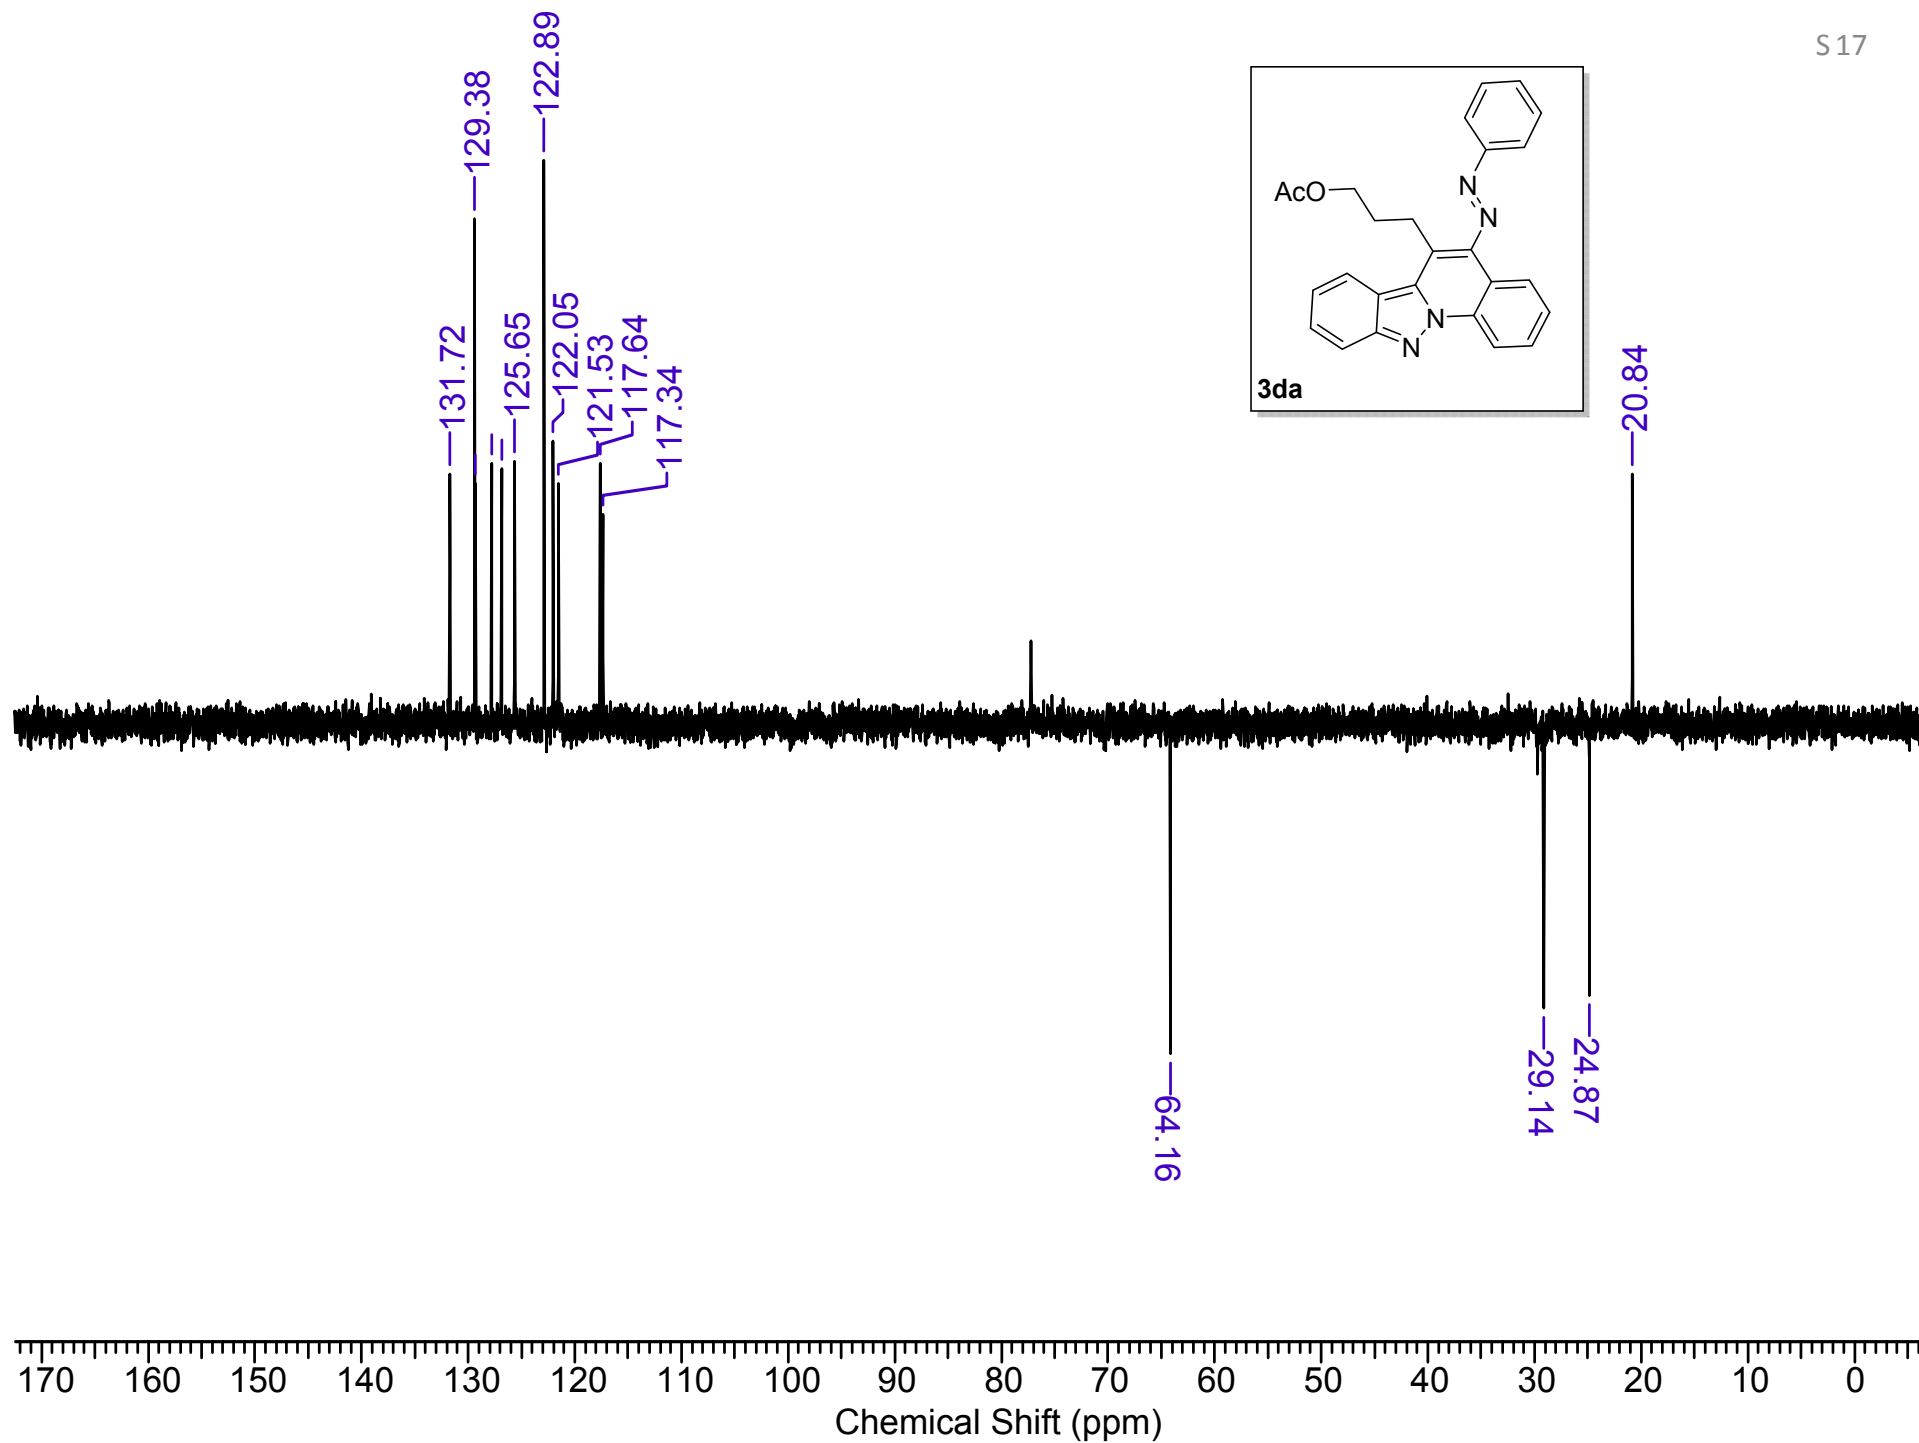

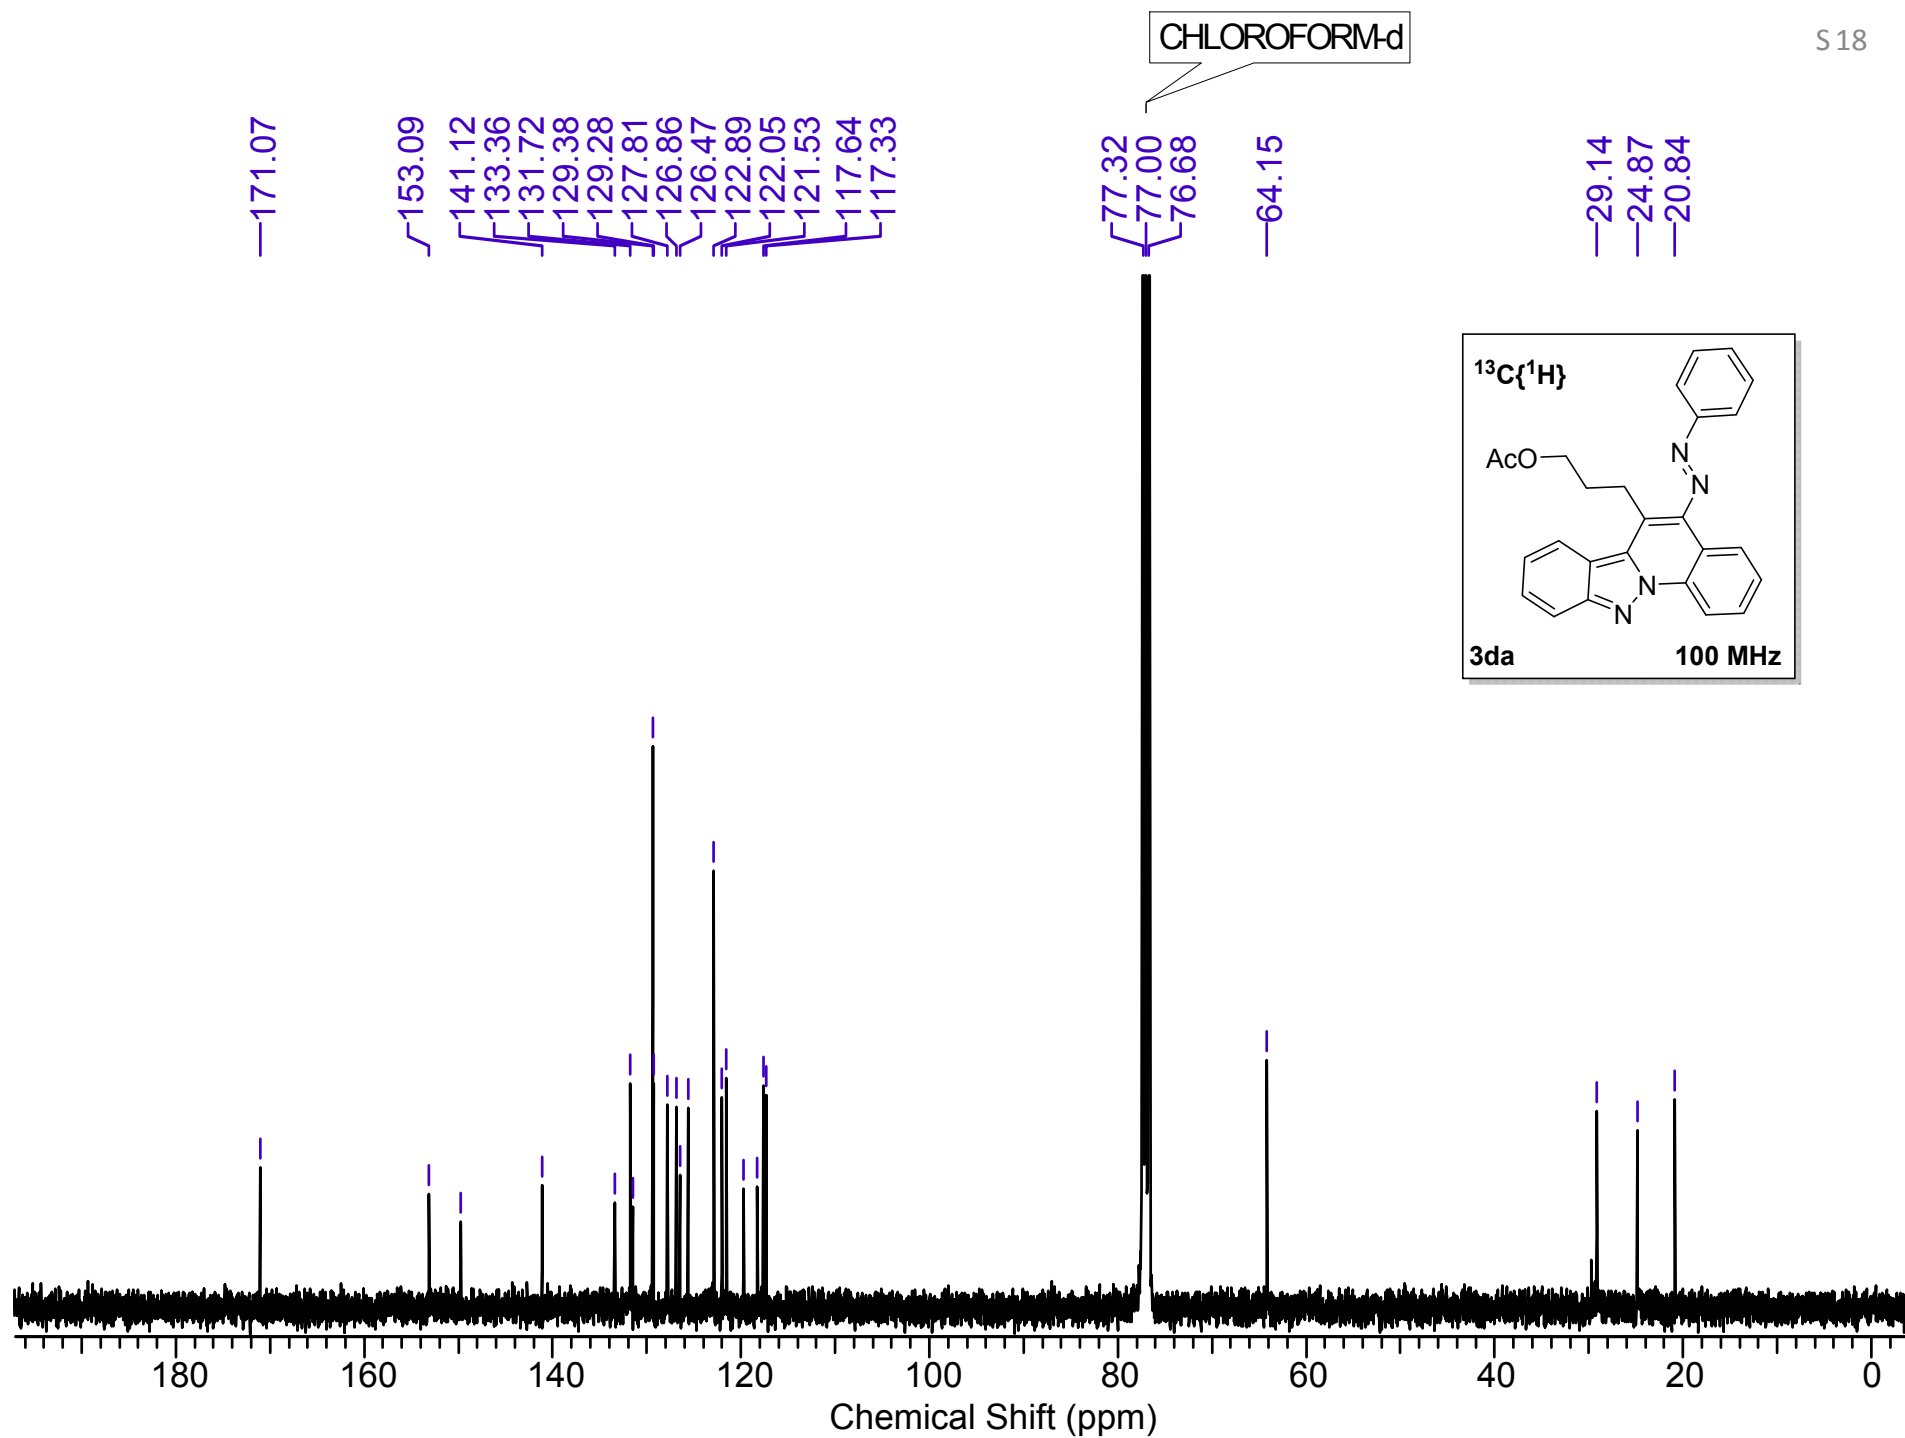

PSD-709 #561 RT: 3.41 AV: 1 NL: 7.12E6  
T: FTMS + p ESI Full ms [100.0000-1500.0000]

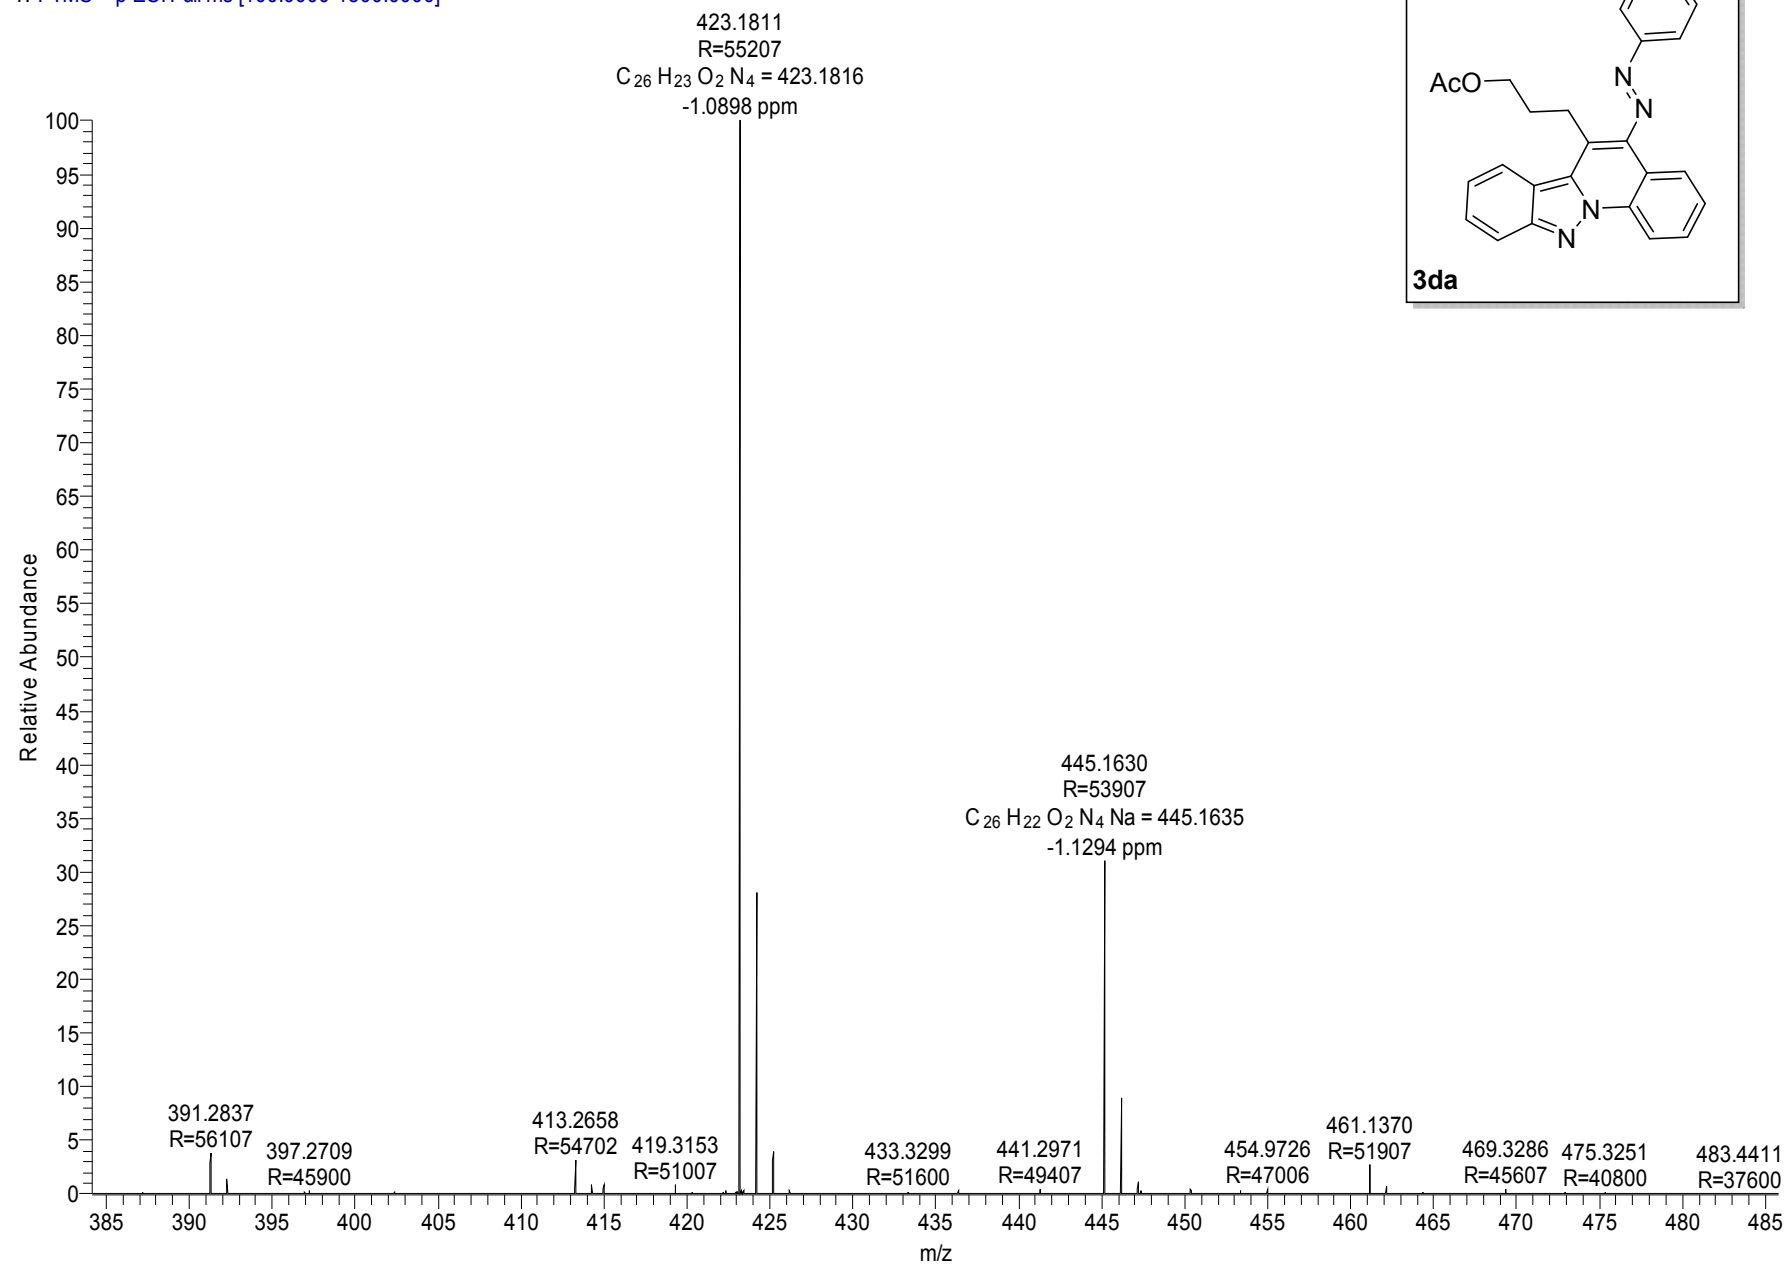

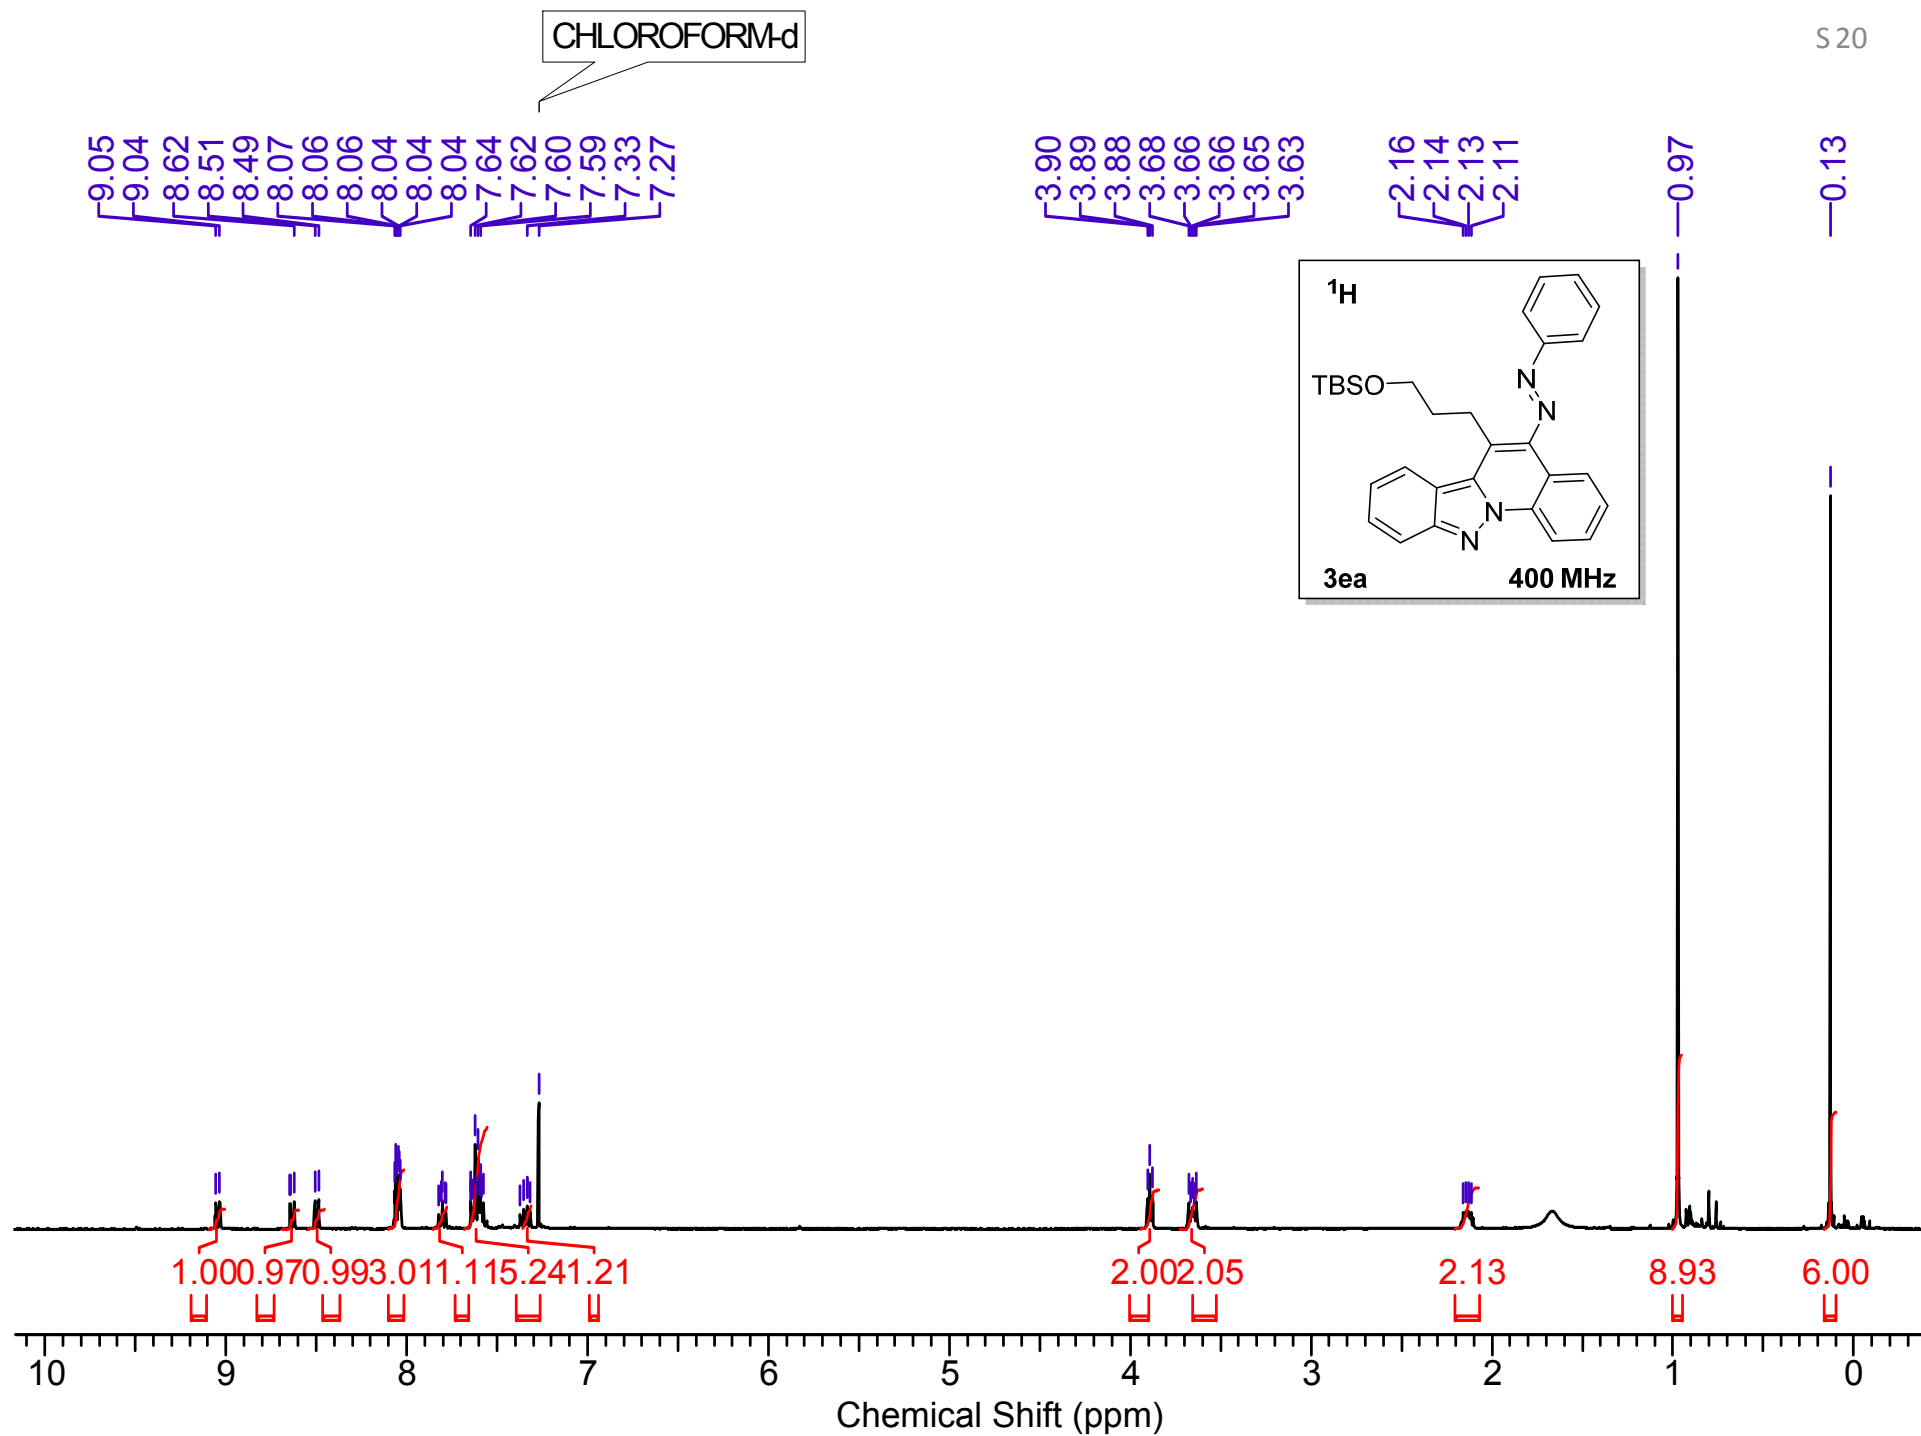

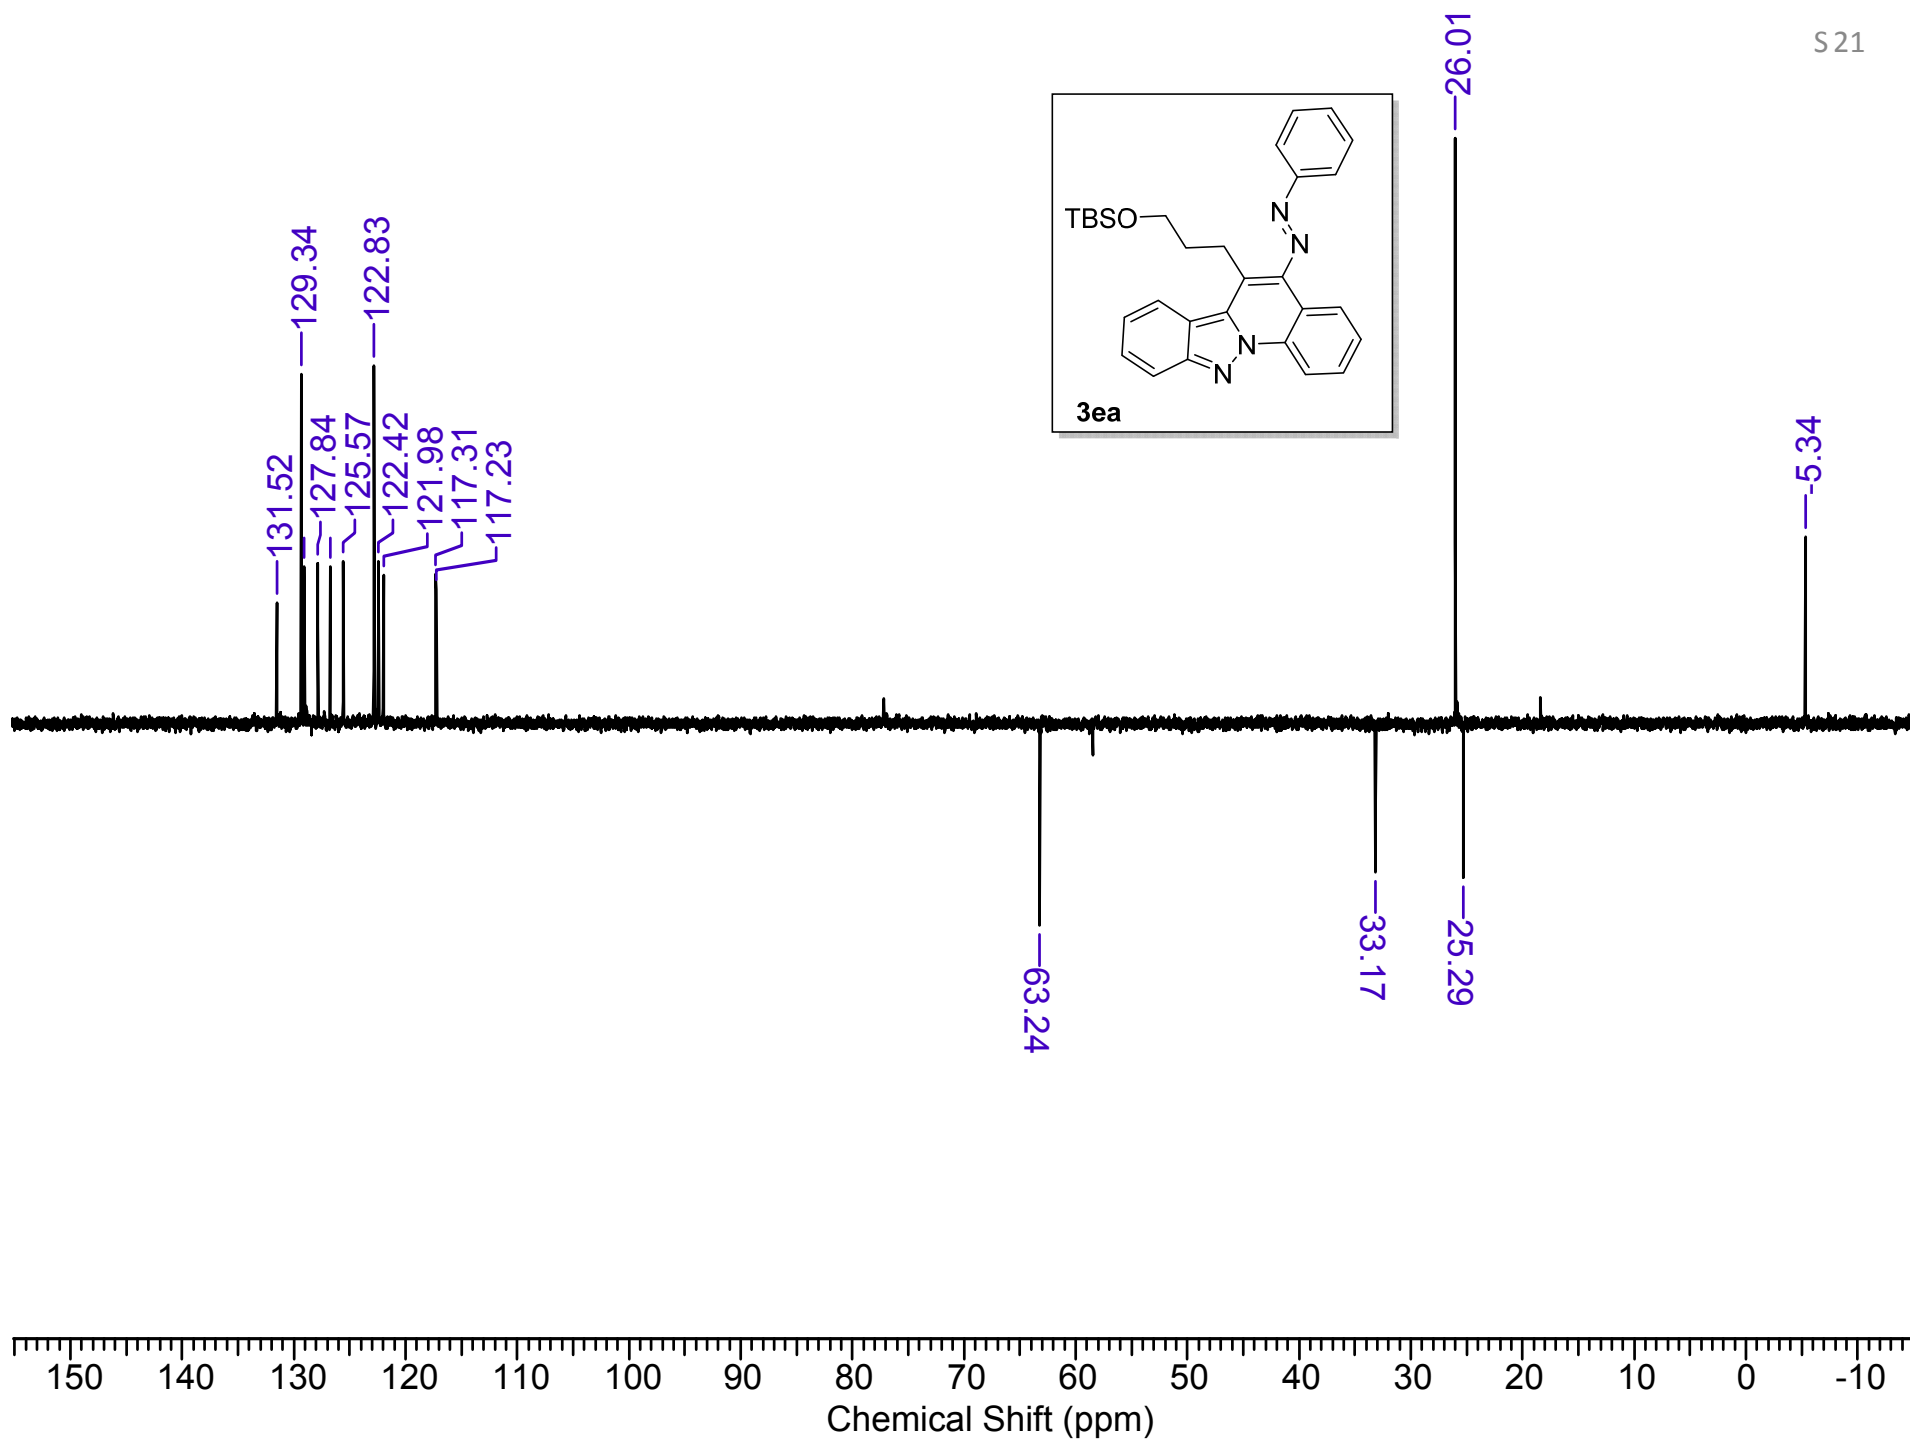

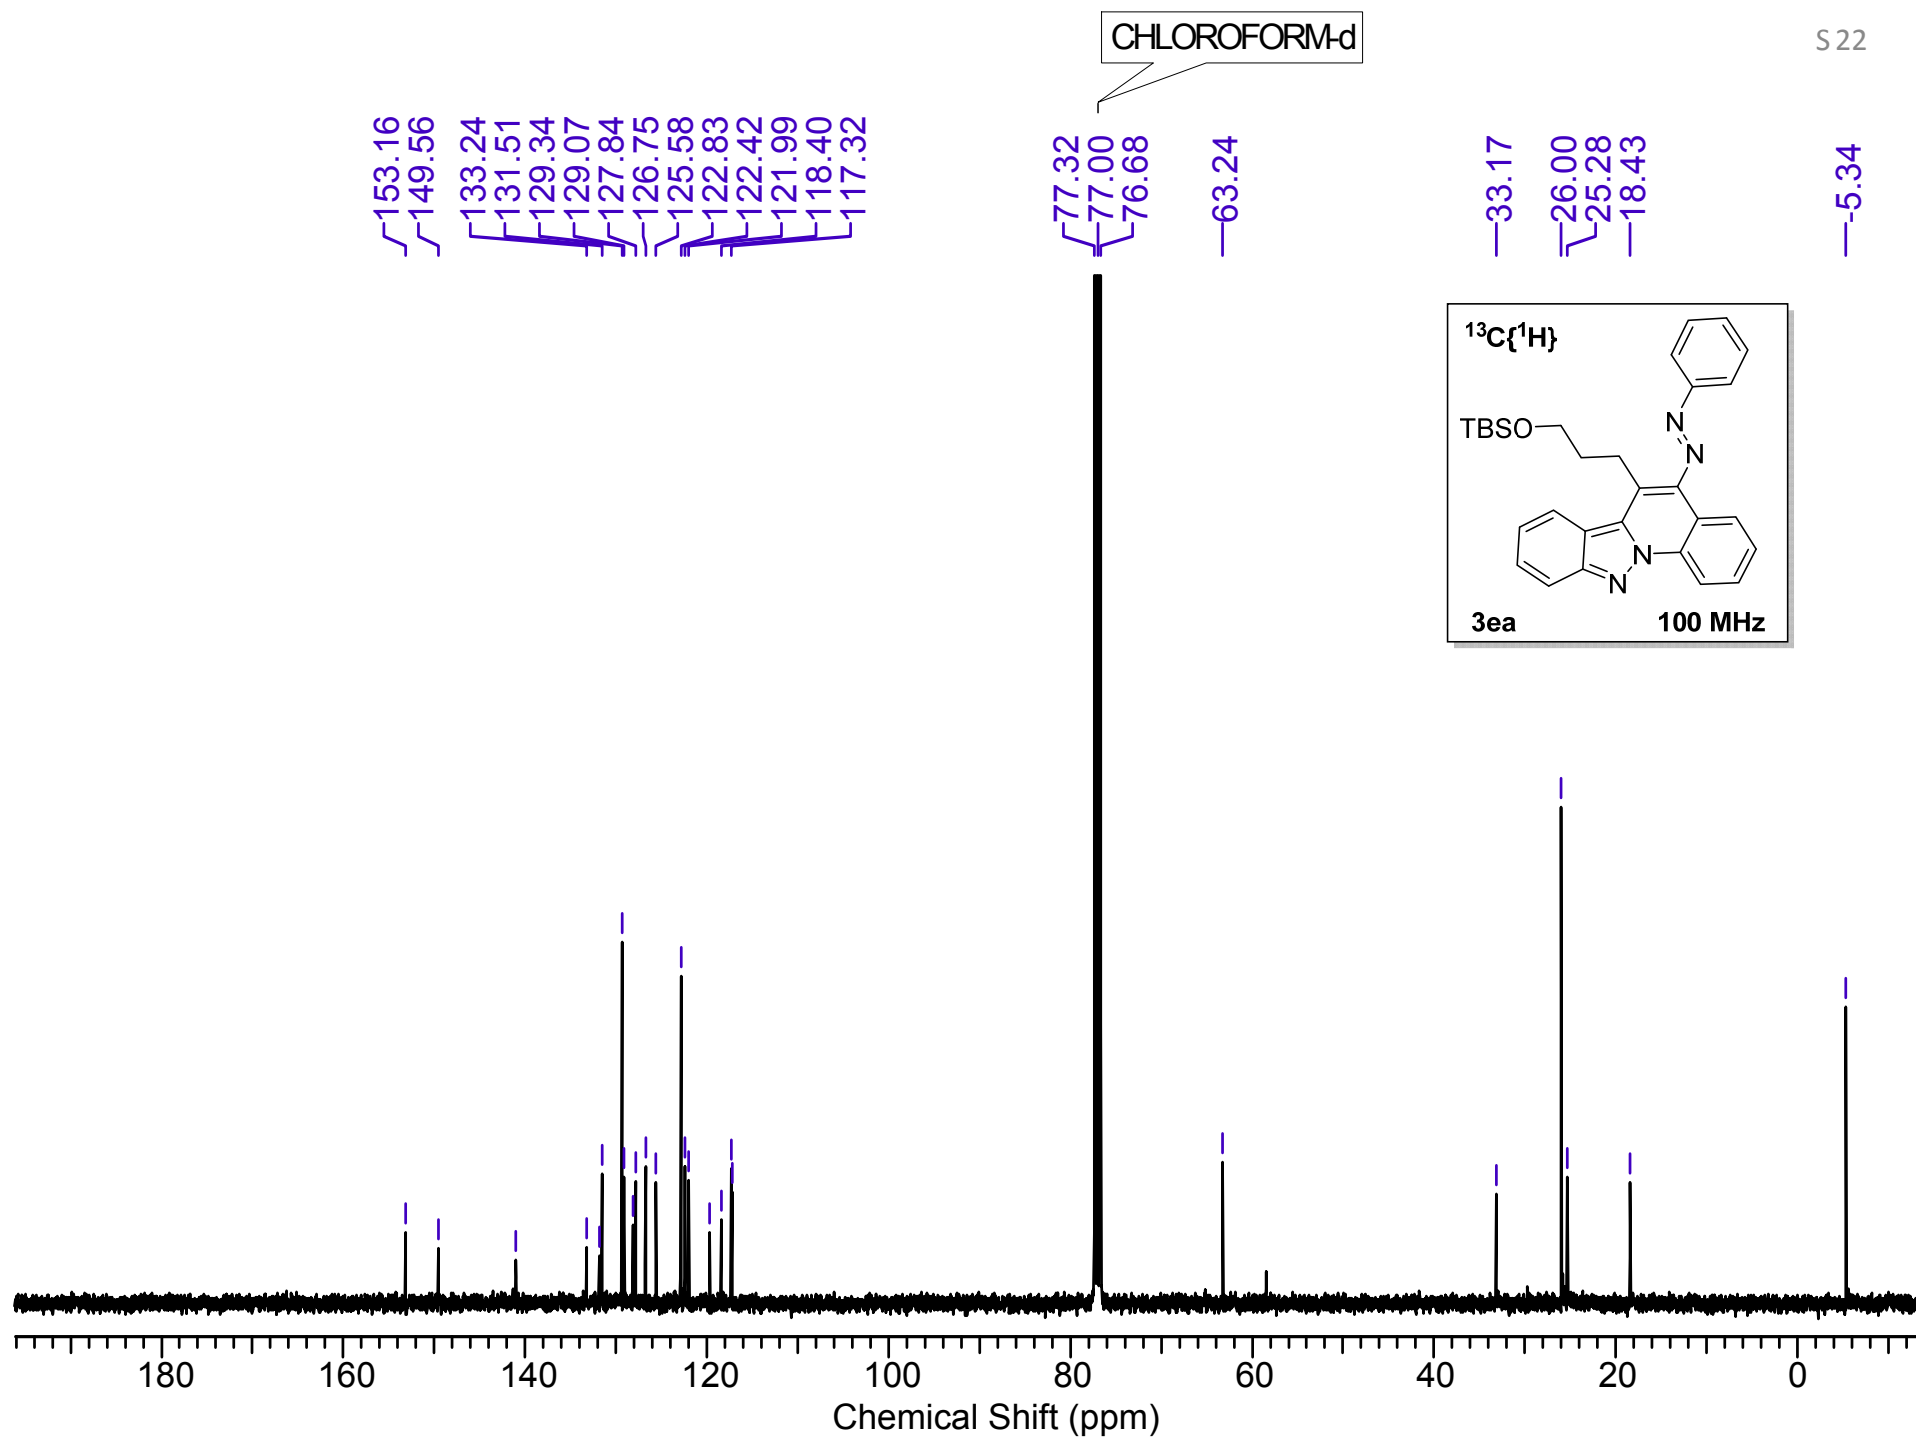

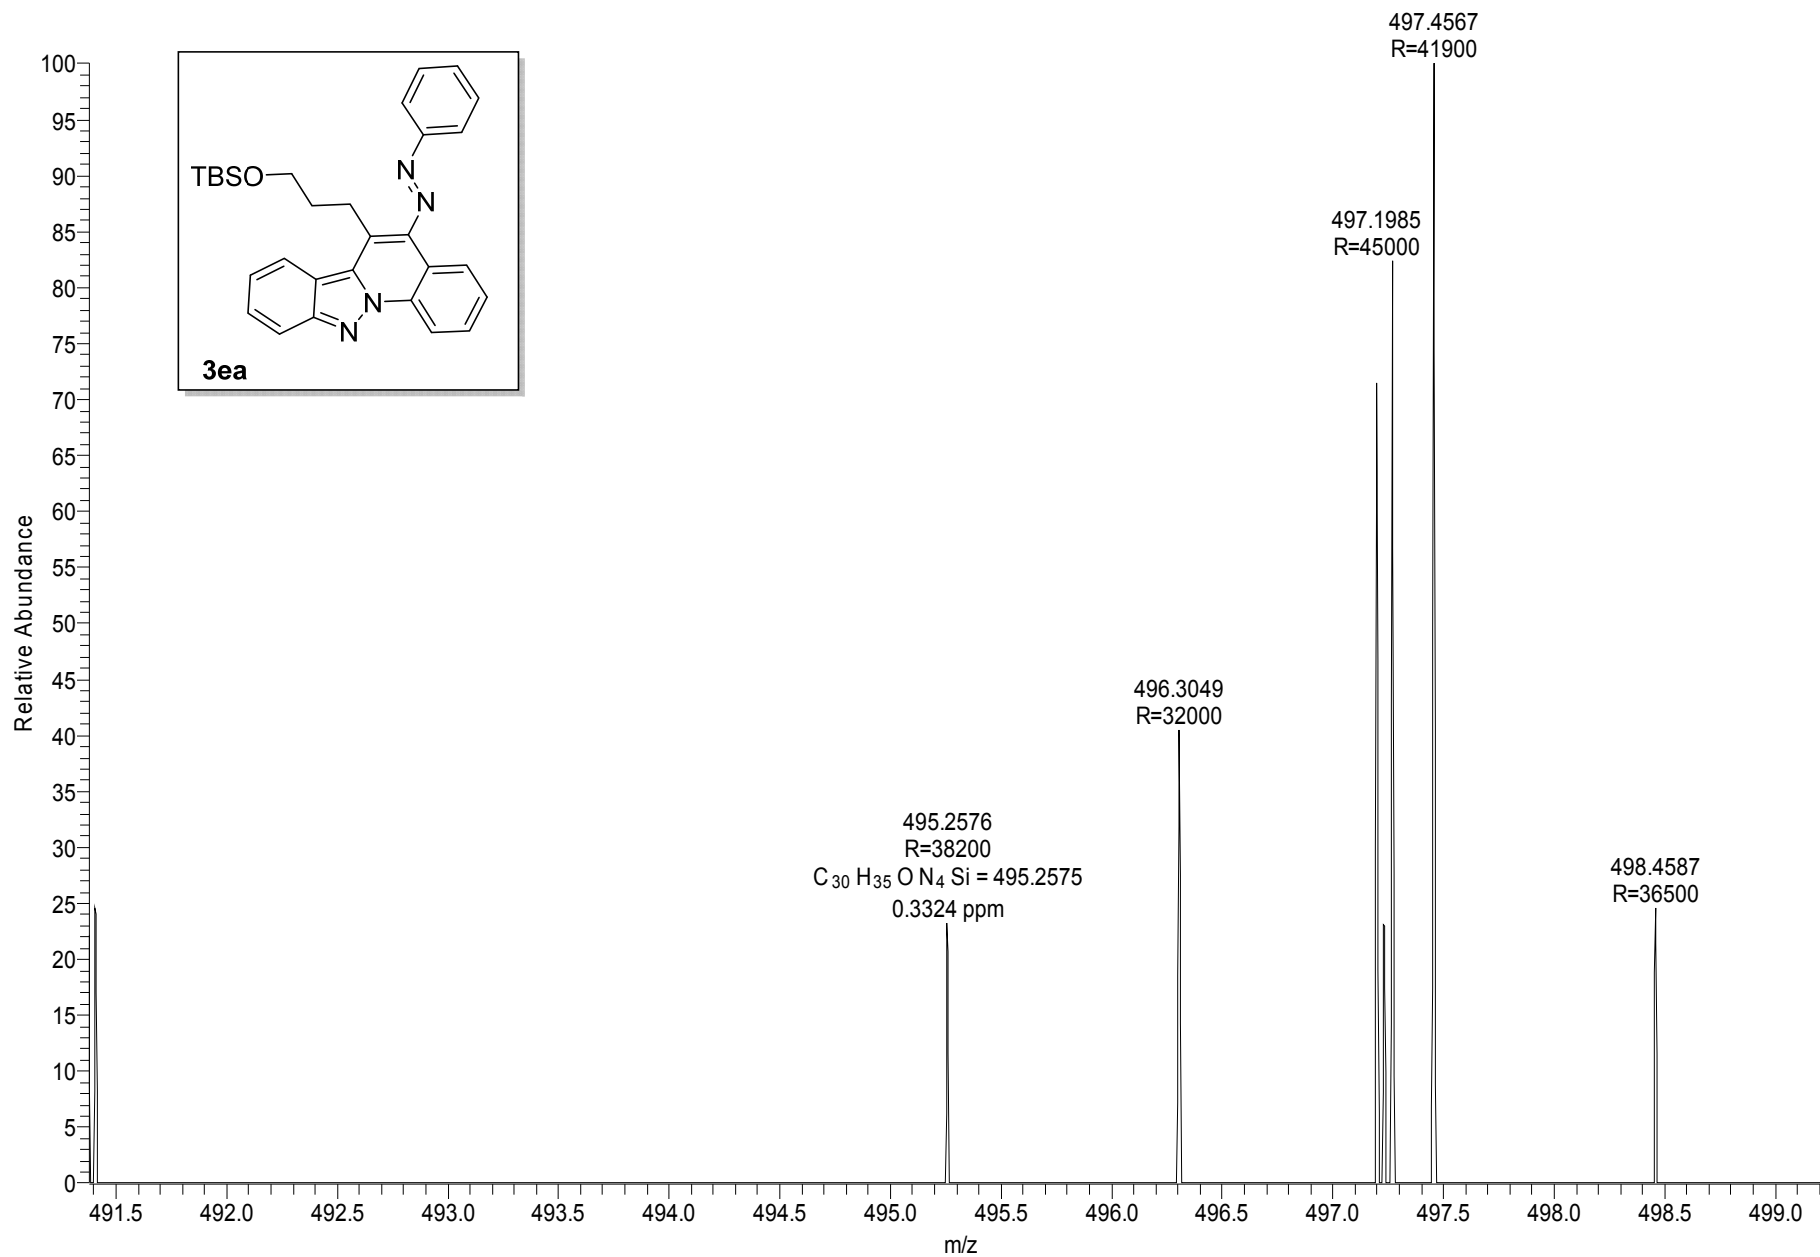

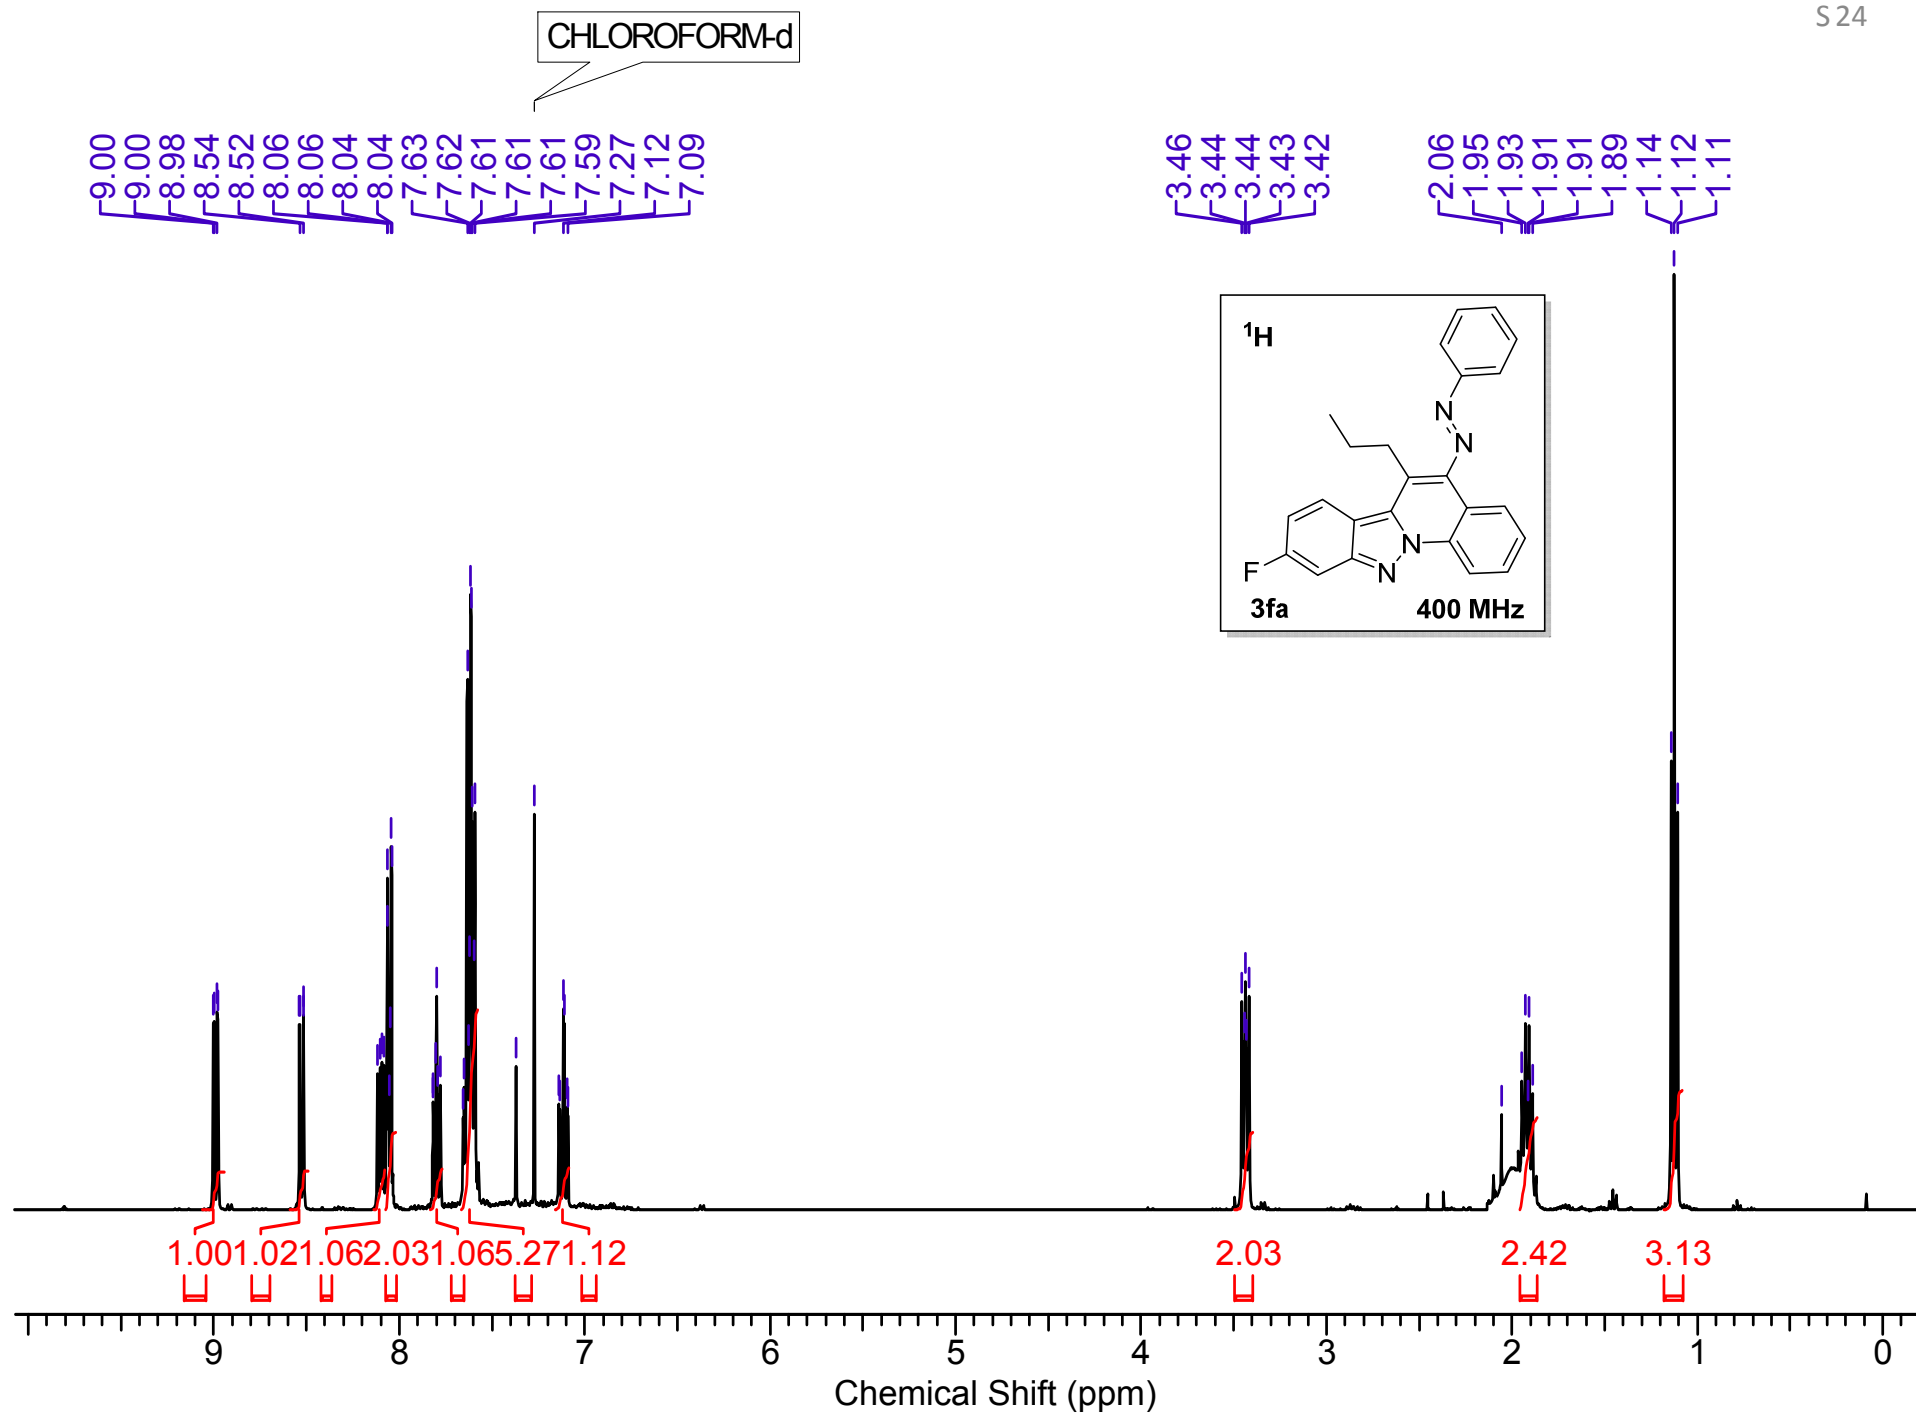



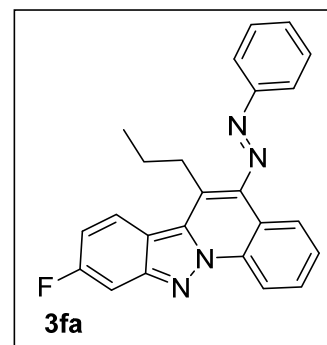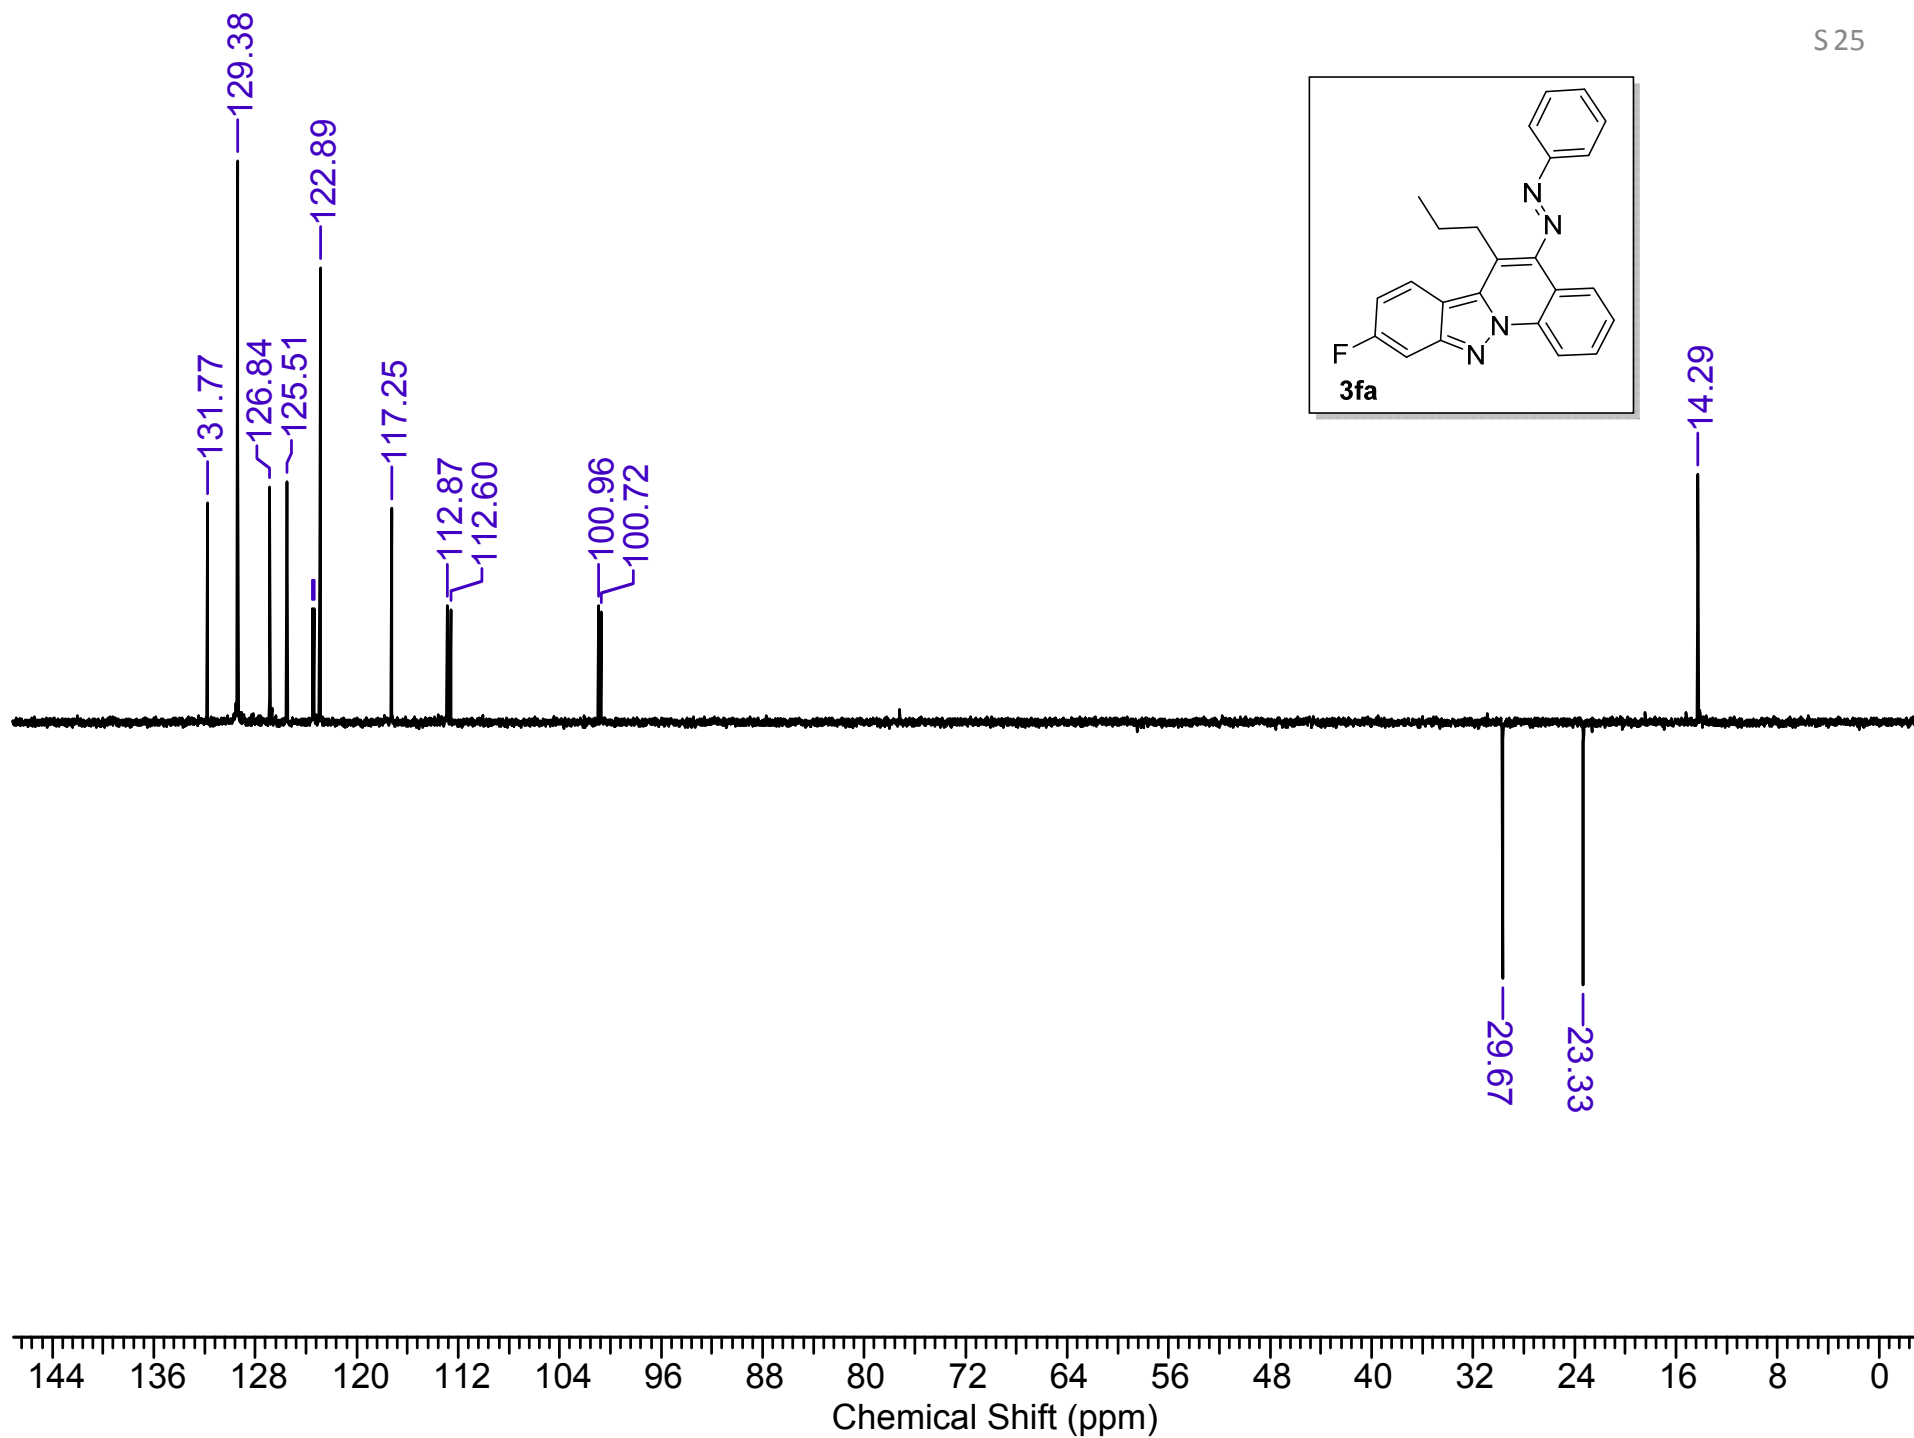

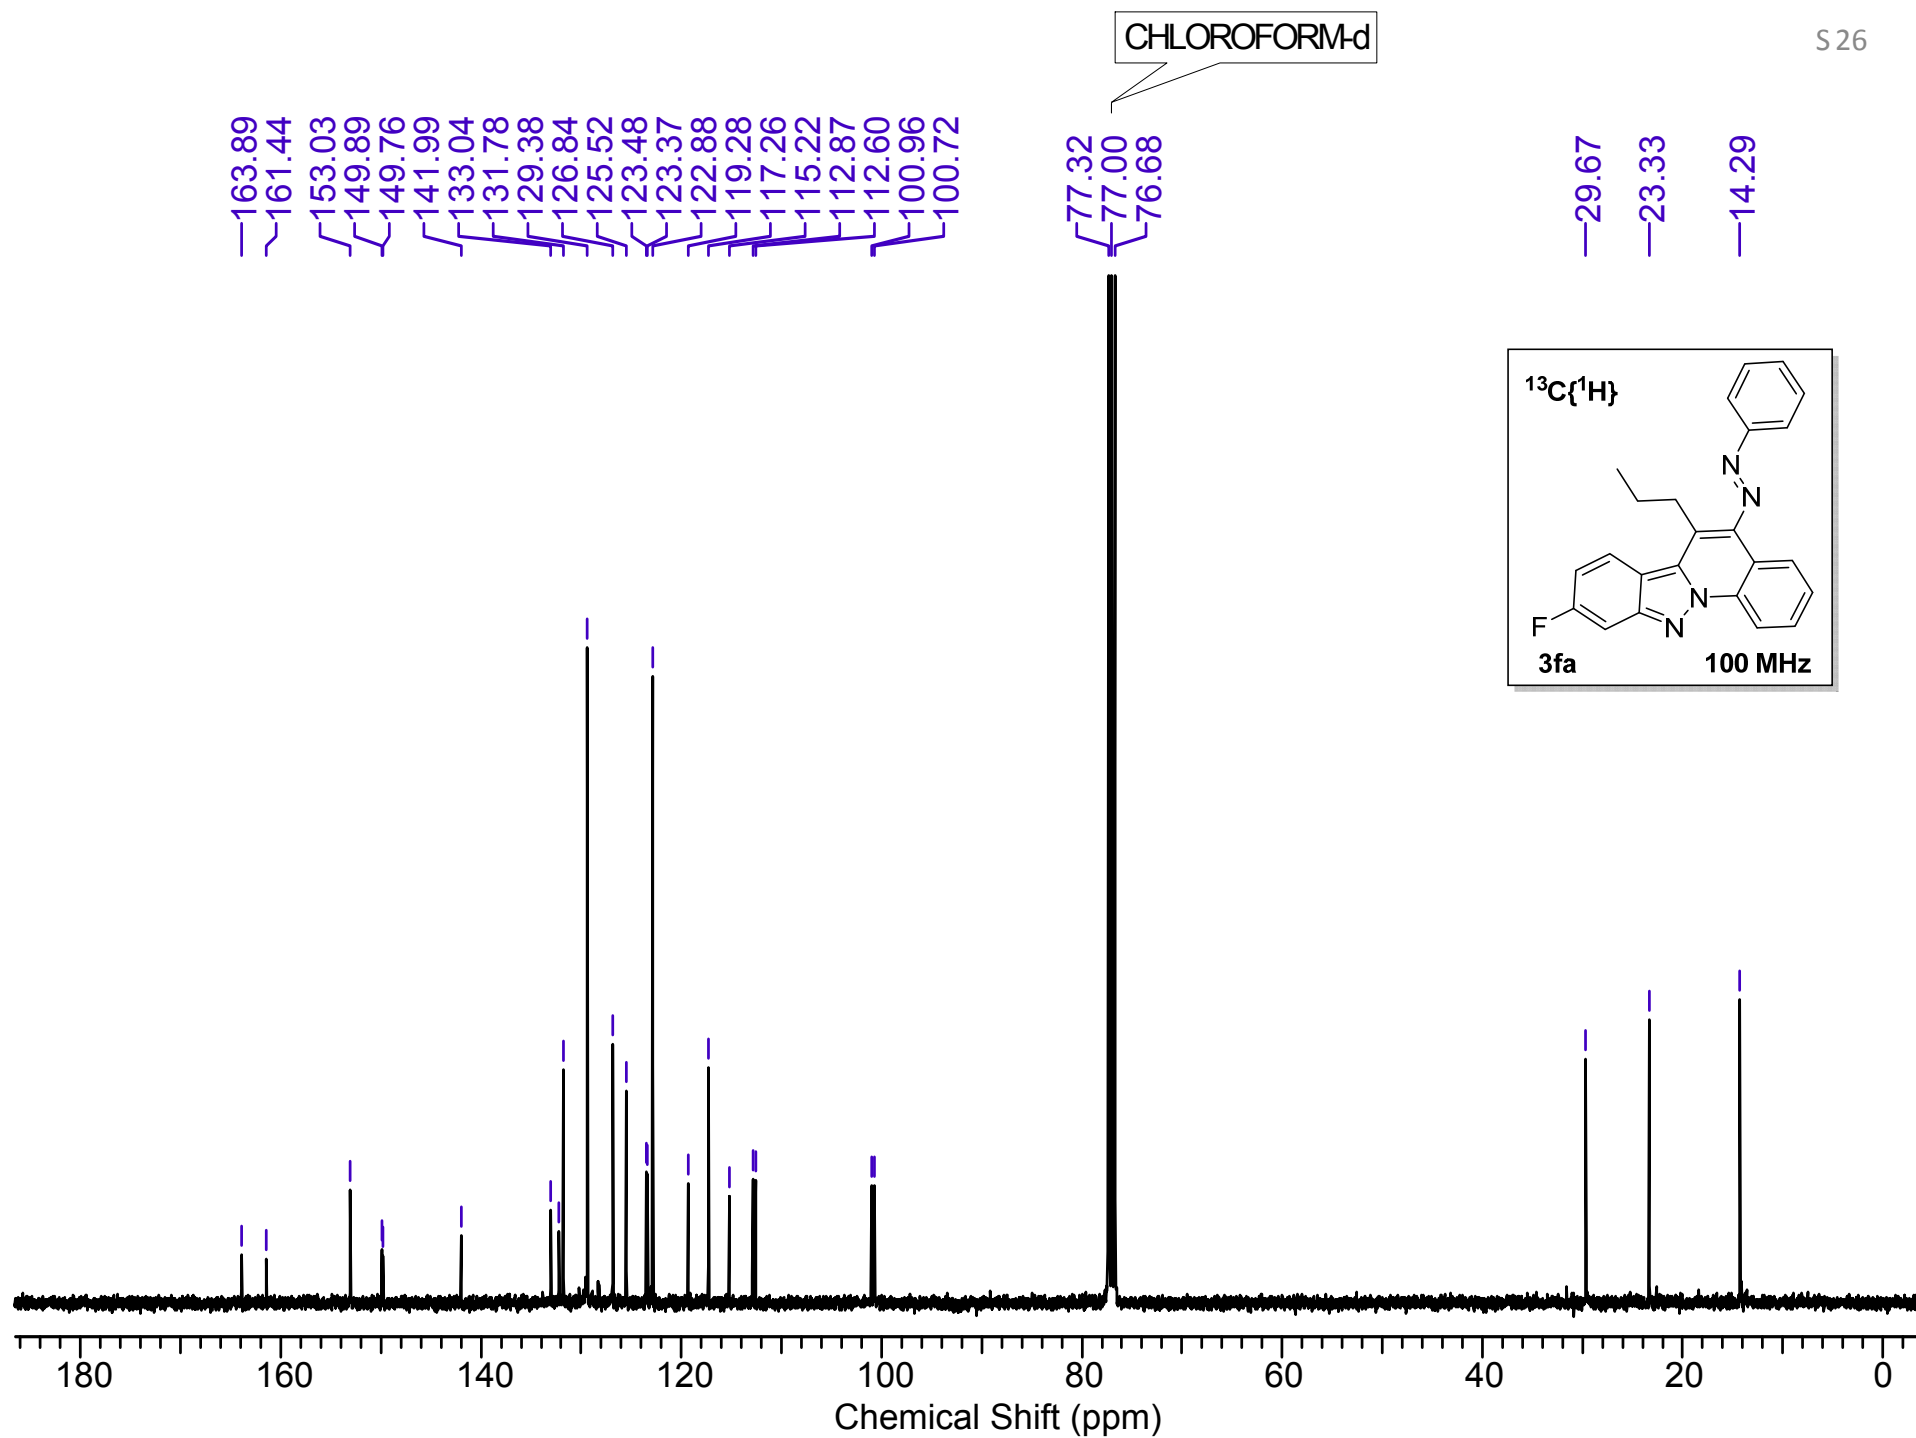

PD-698\_201231124221 #848 RT: 6.97 AV: 1 NL: 4.44E6  
T: FTMS + p ESI Full ms [100.0000-1500.0000]

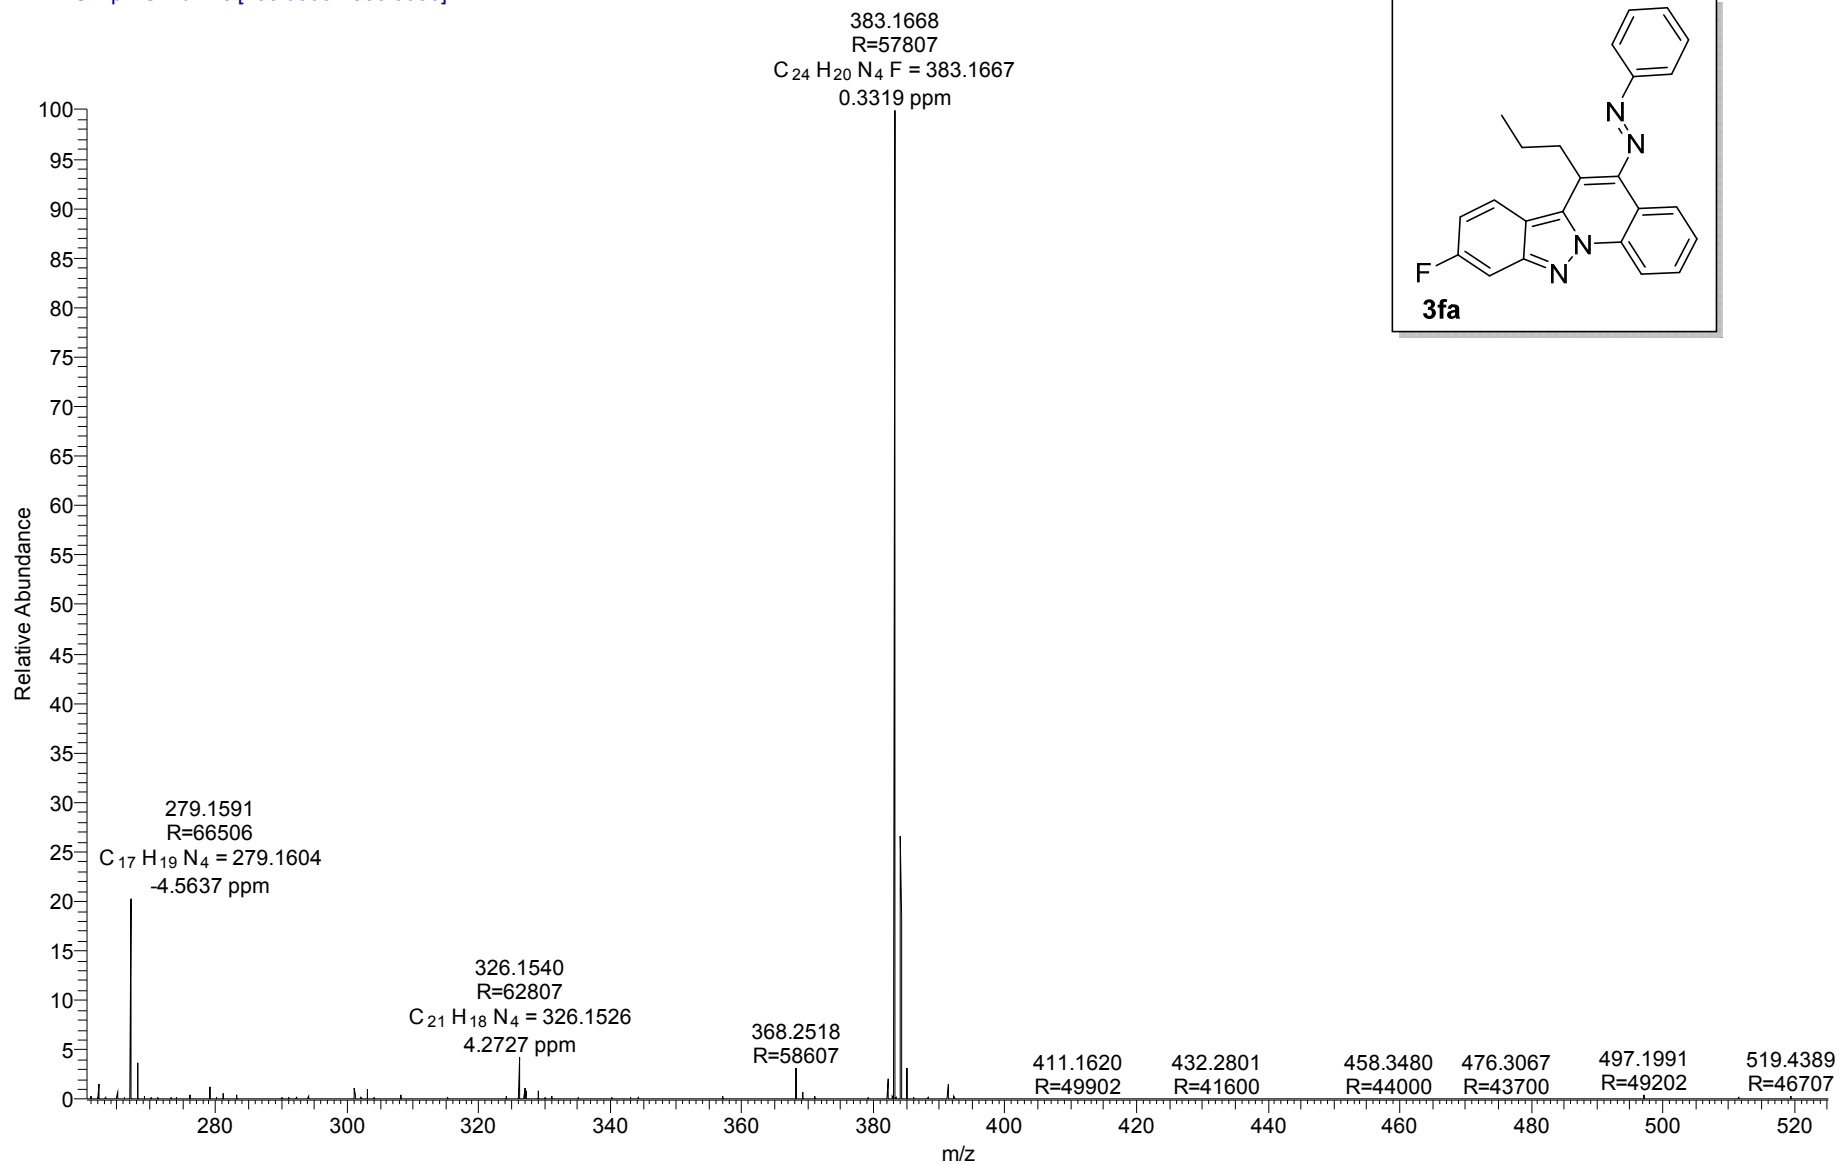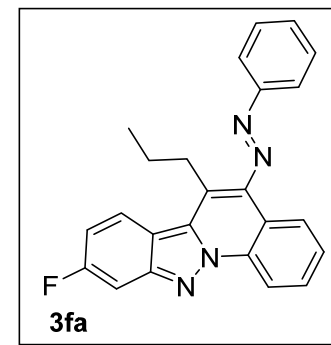

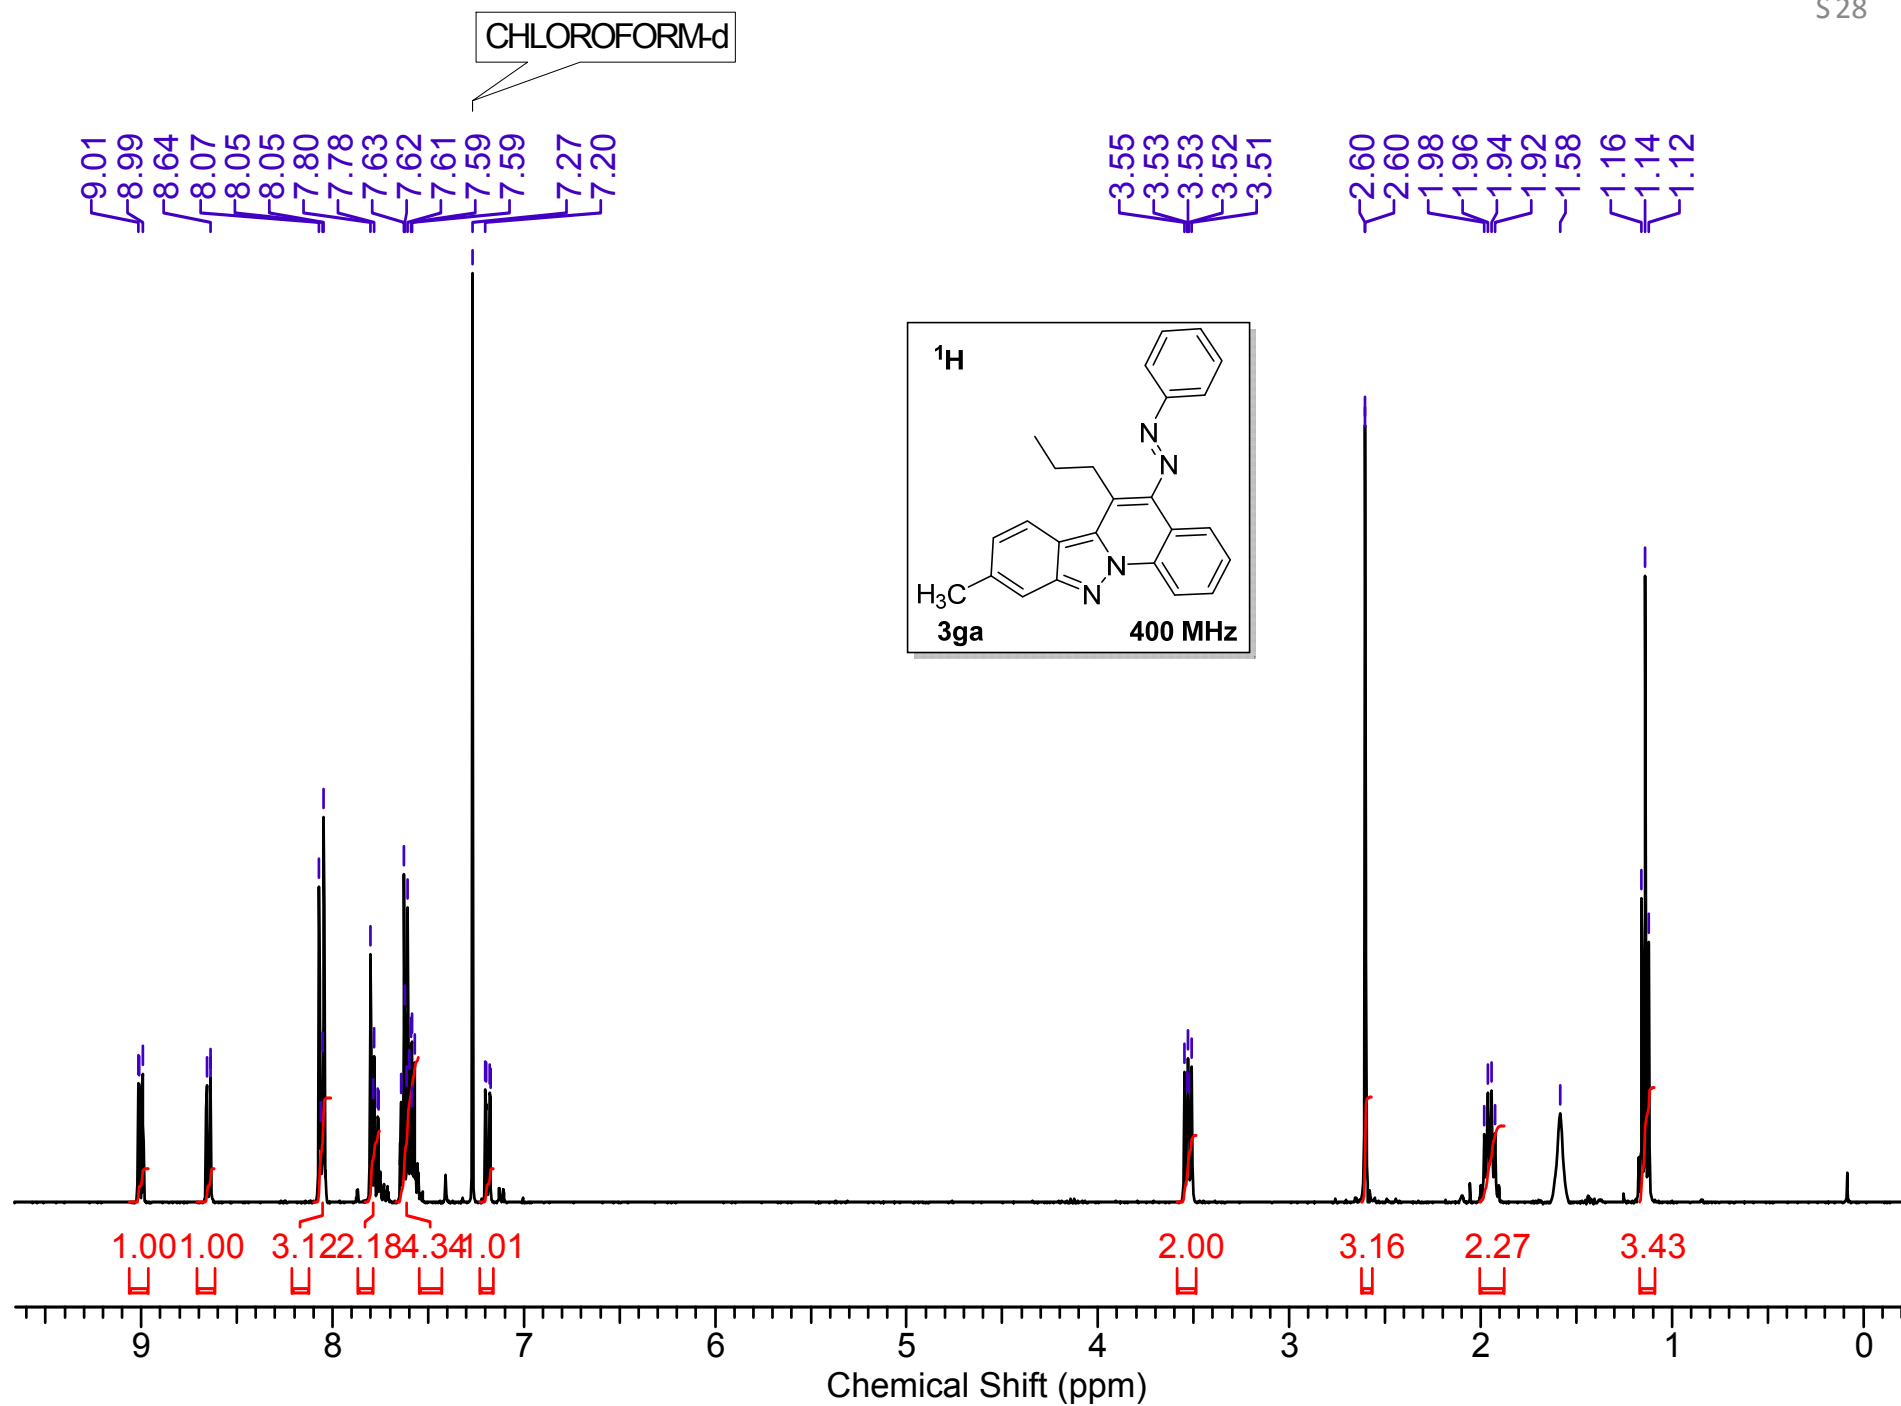

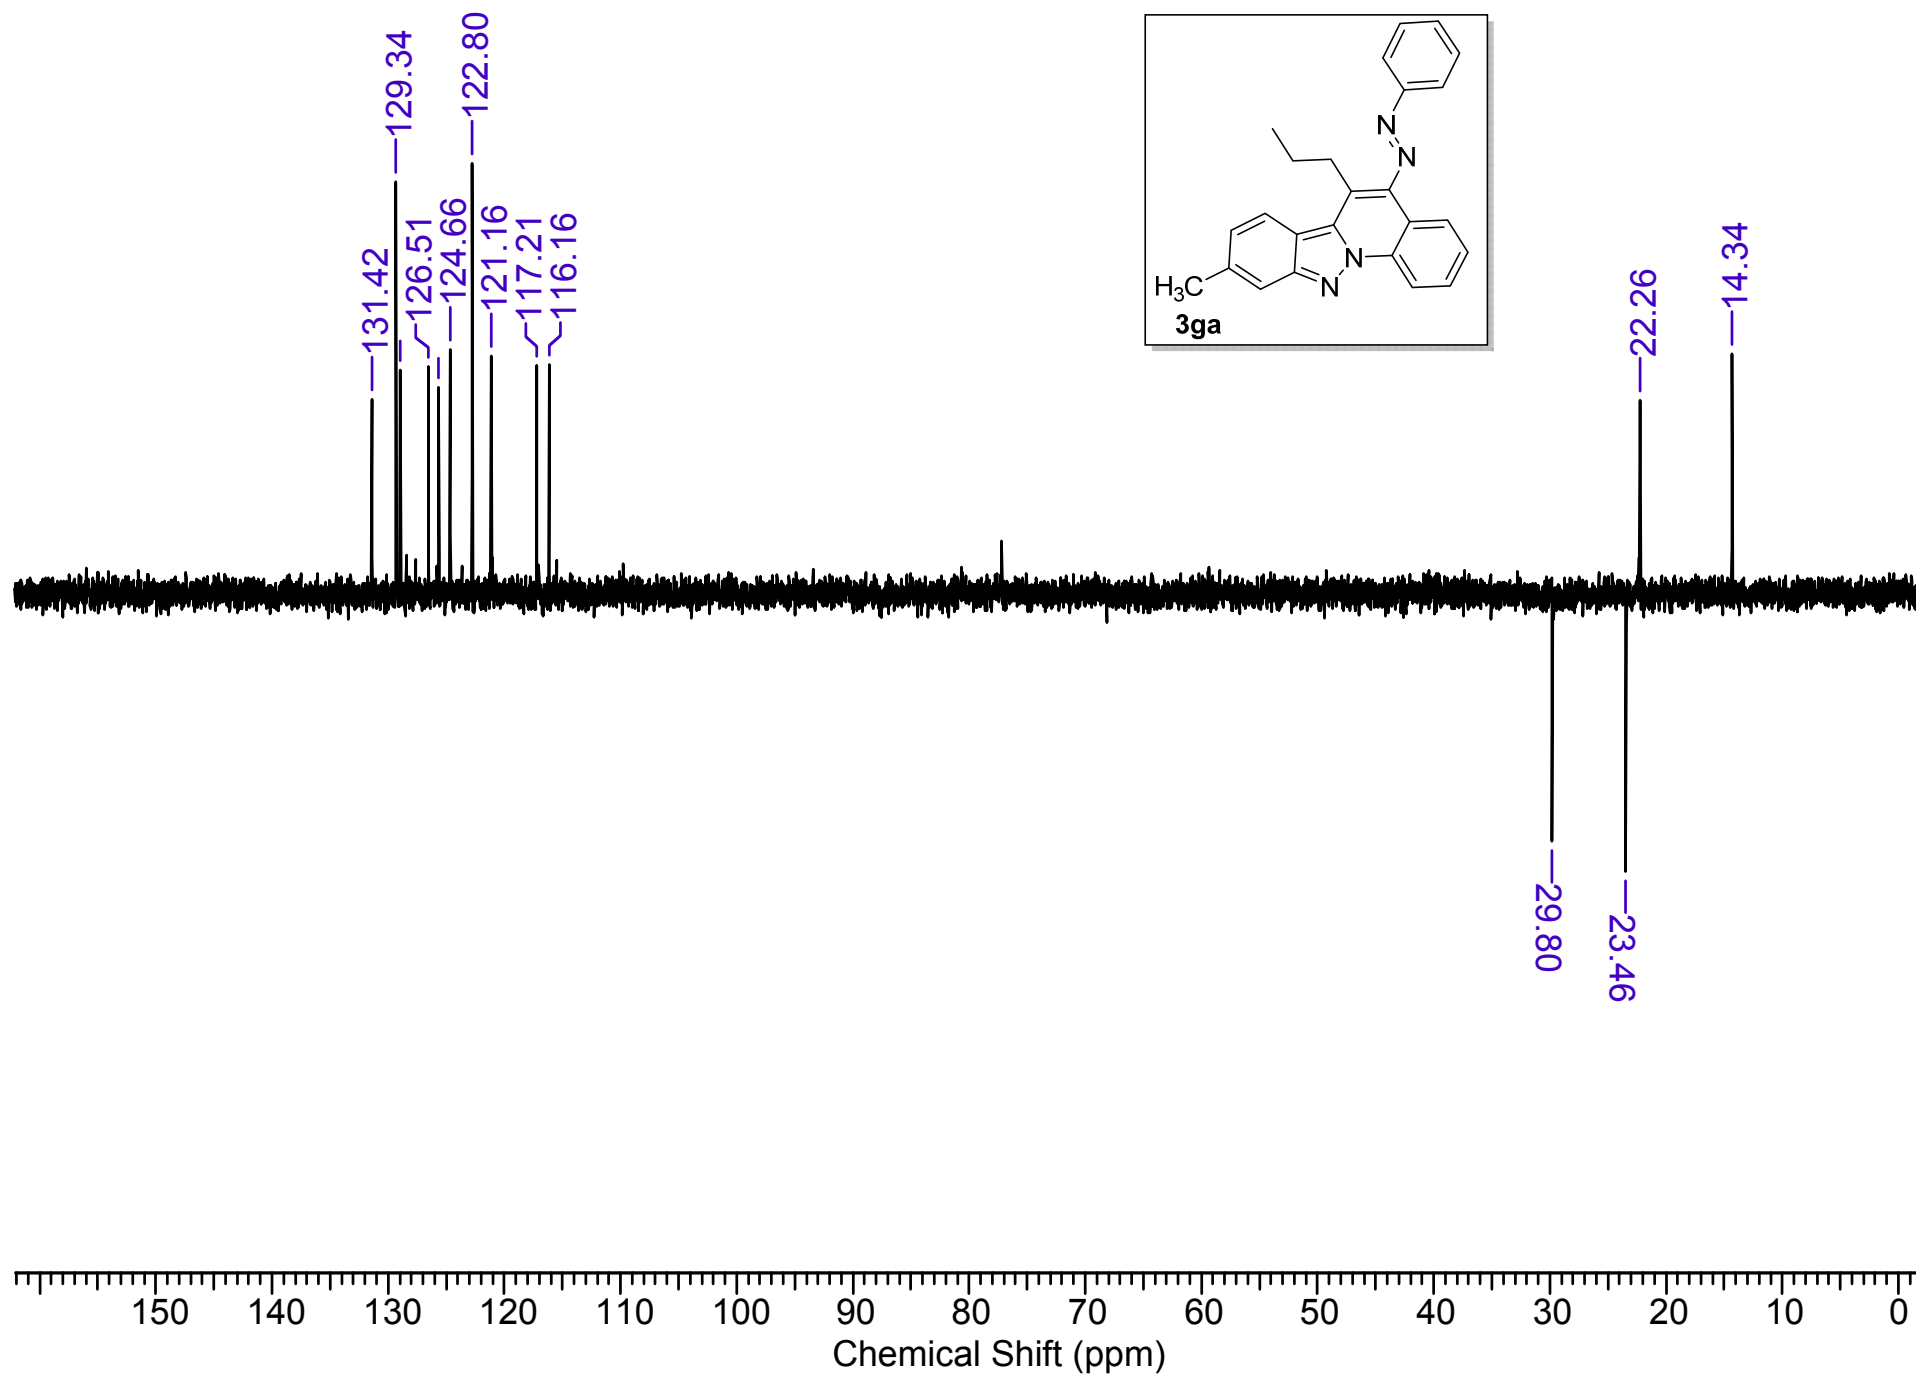

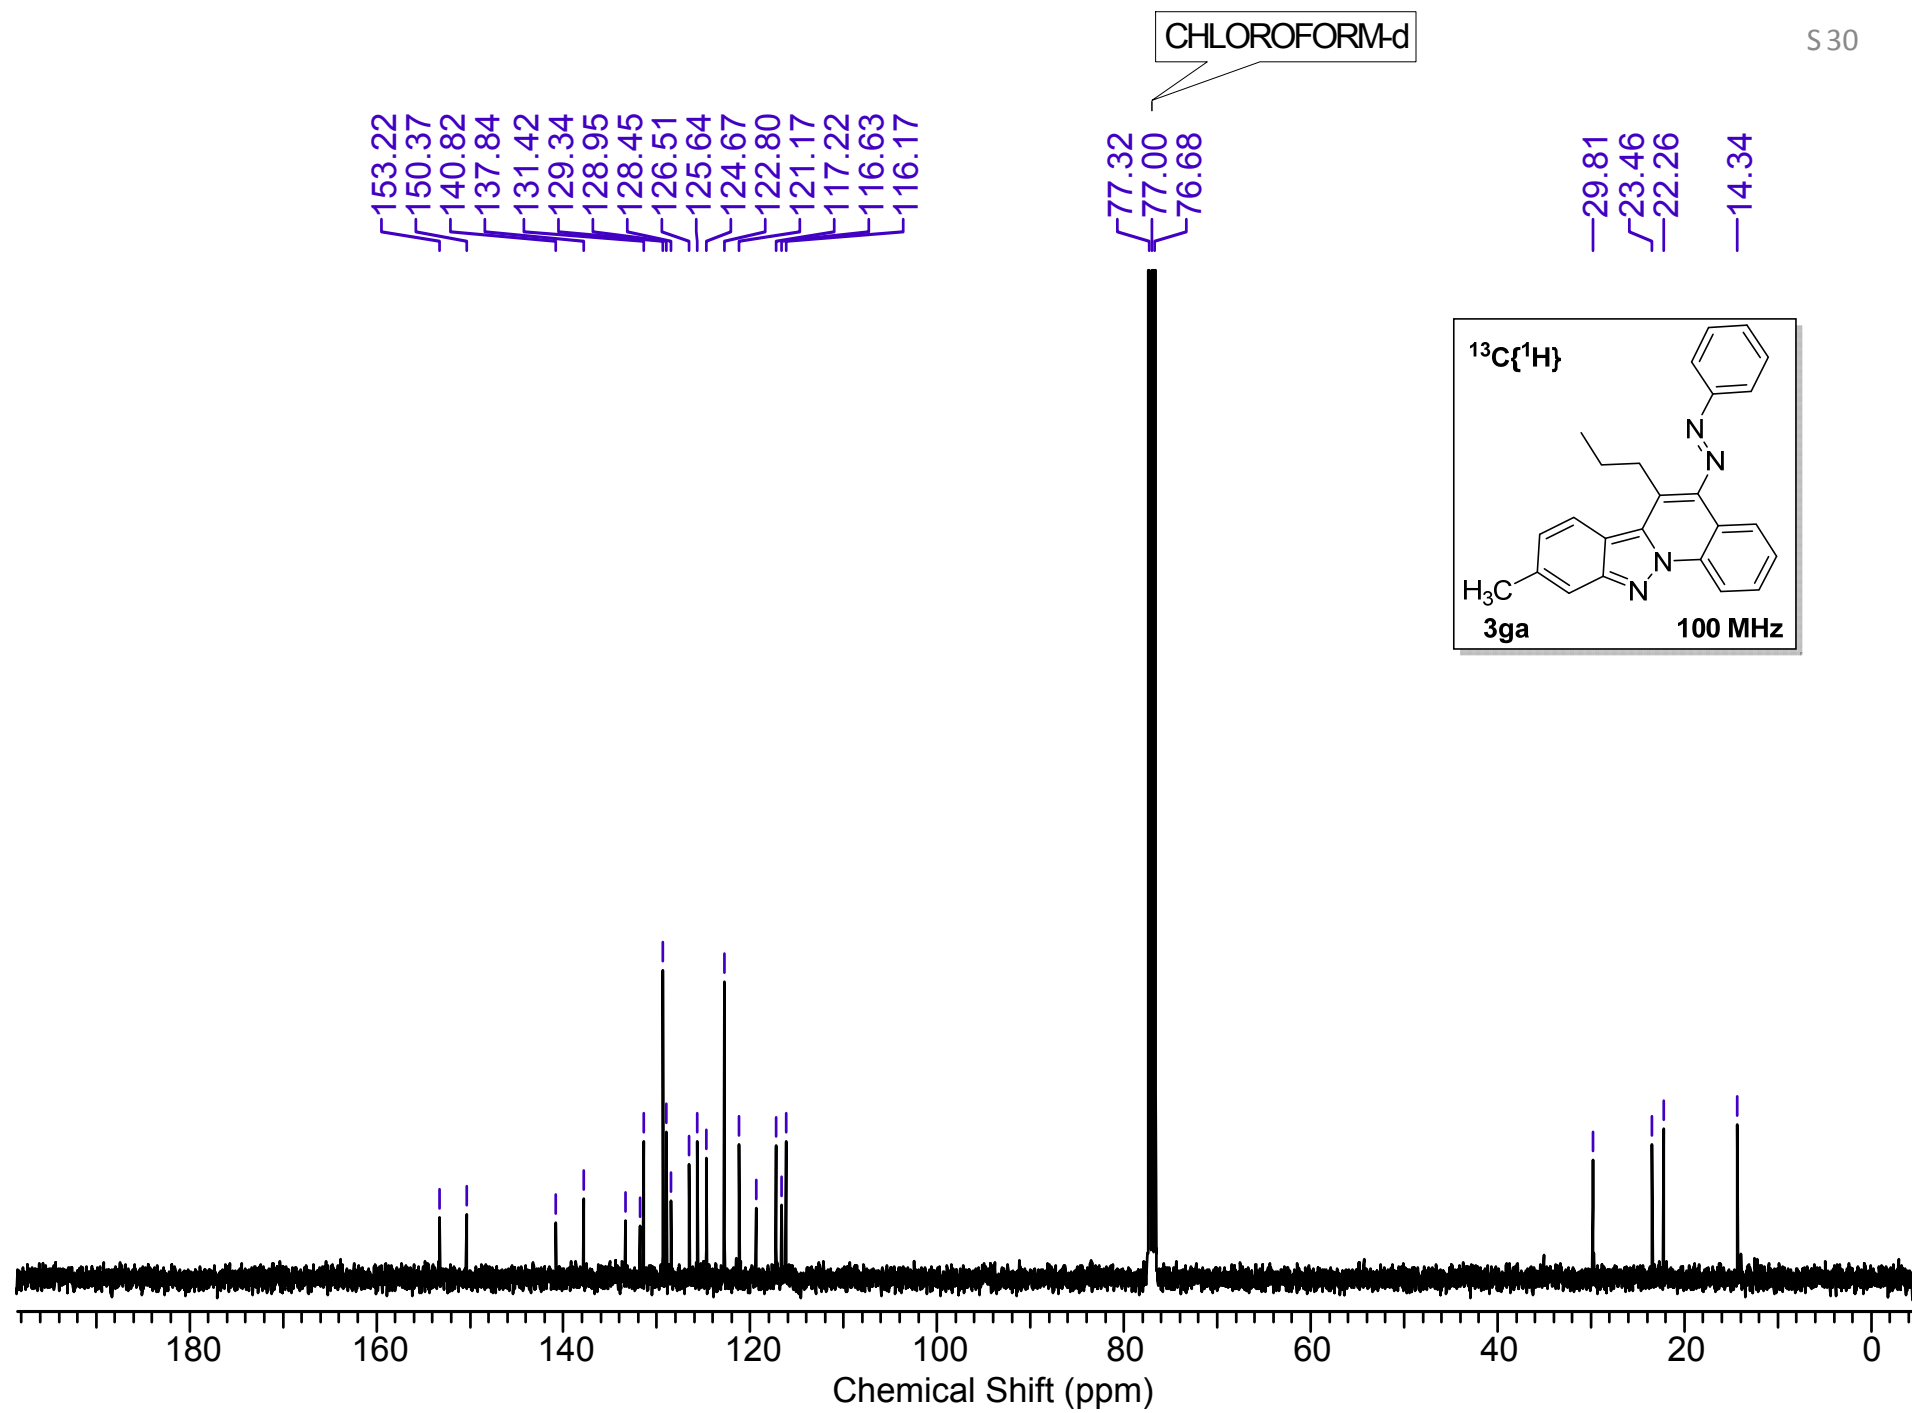

PD-692 #938 RT: 7.97 AV: 1 NL: 1.30E7  
T: FTMS + p ESI Full ms [100.0000-1500.0000]

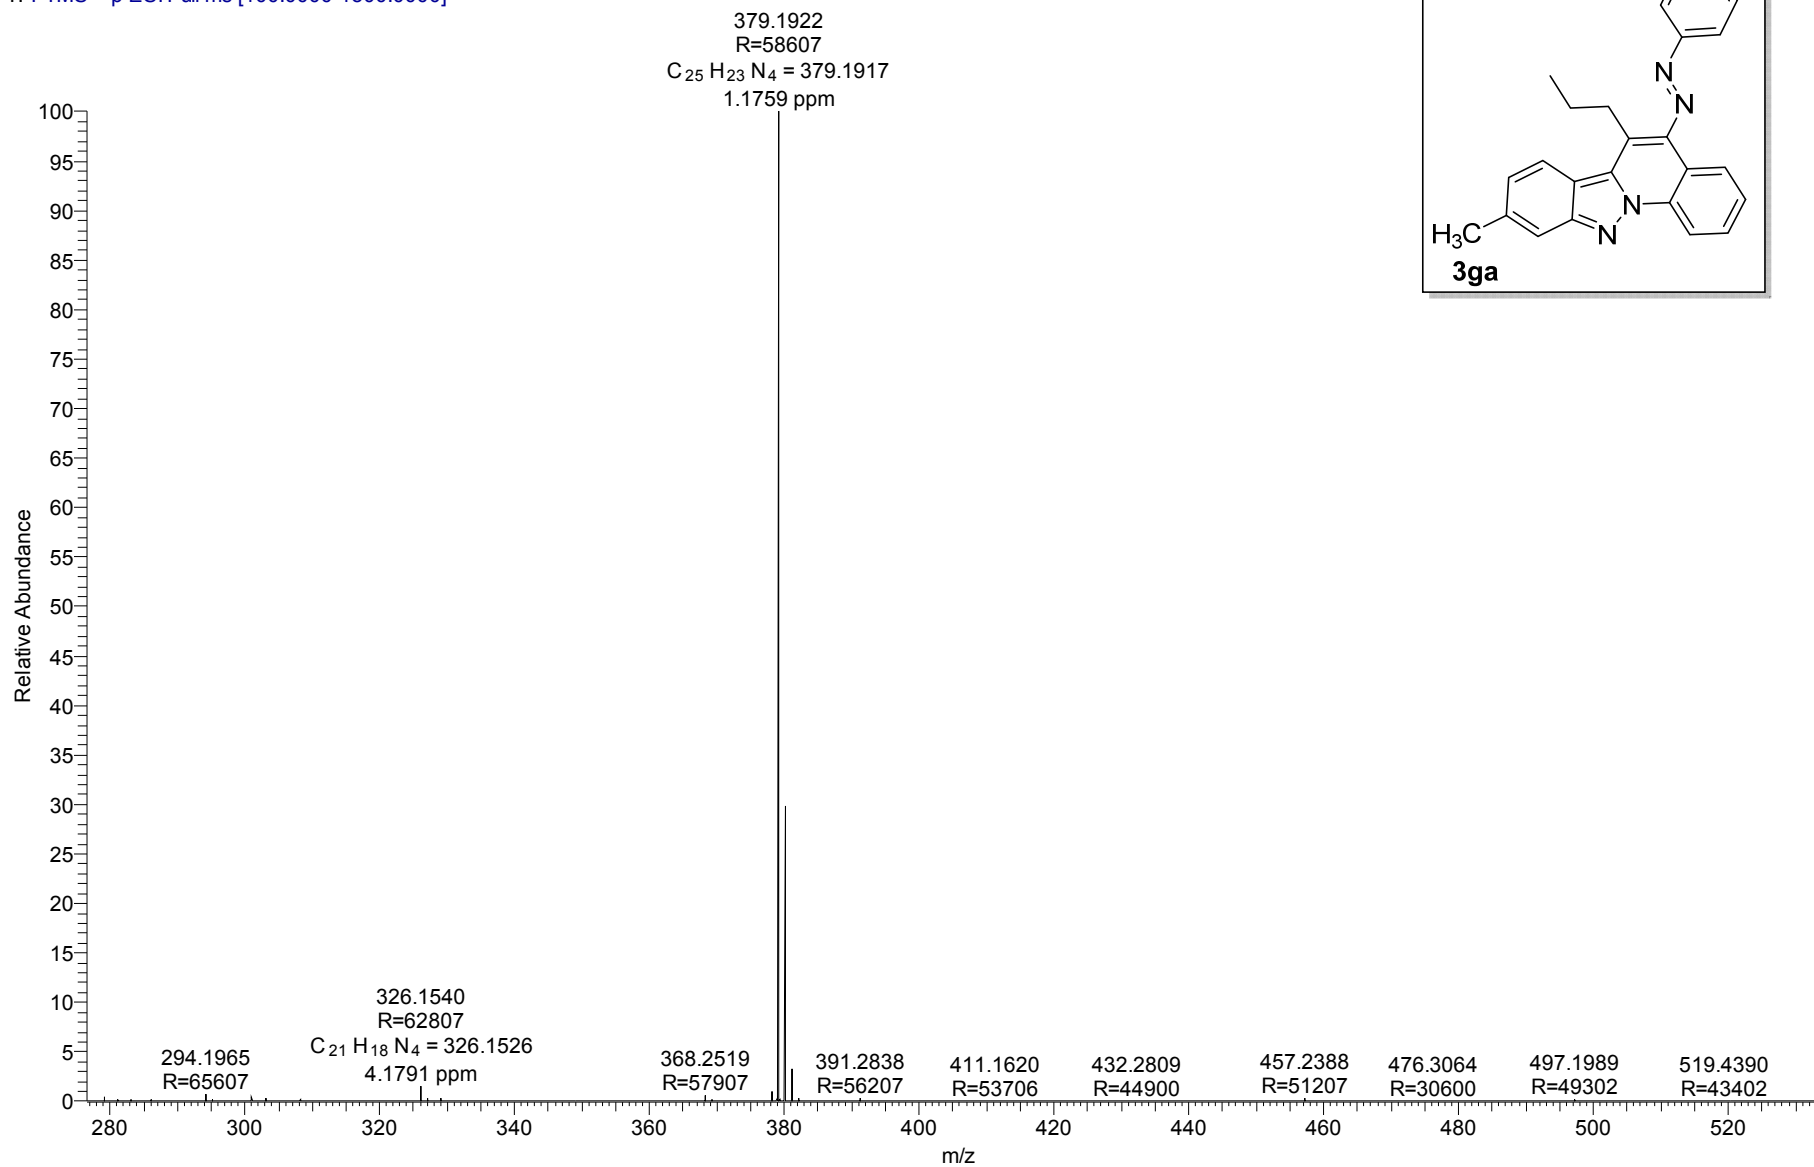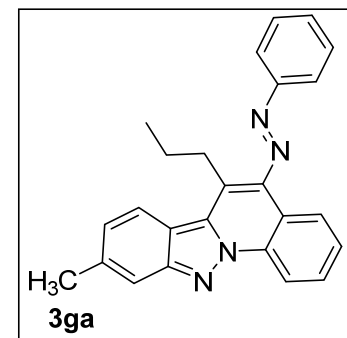

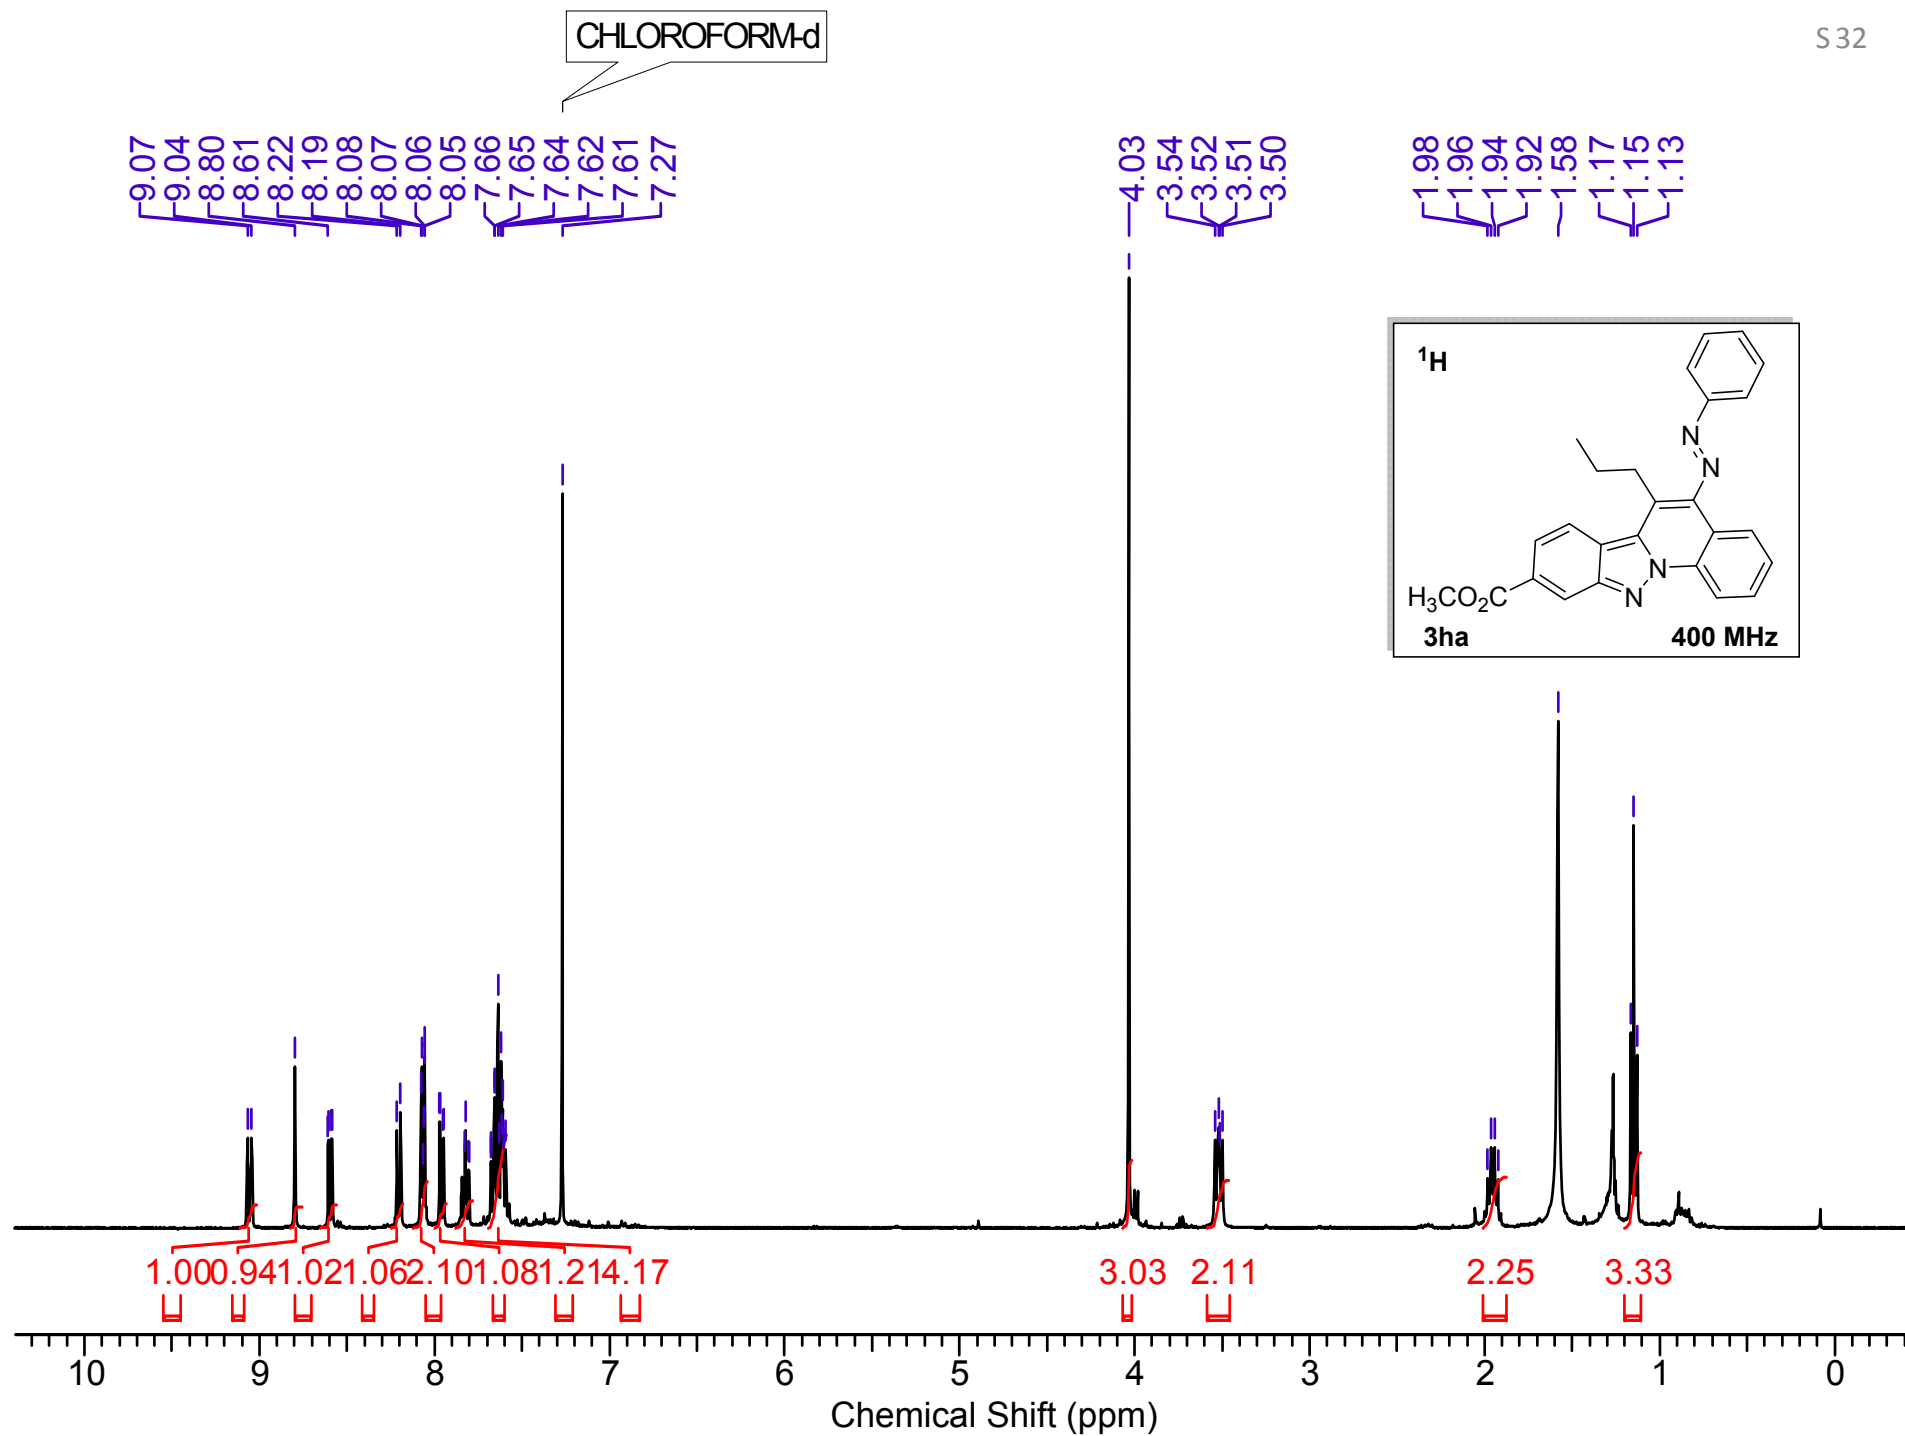



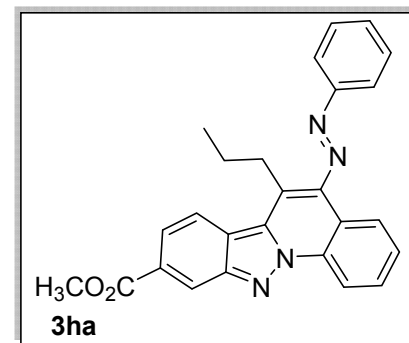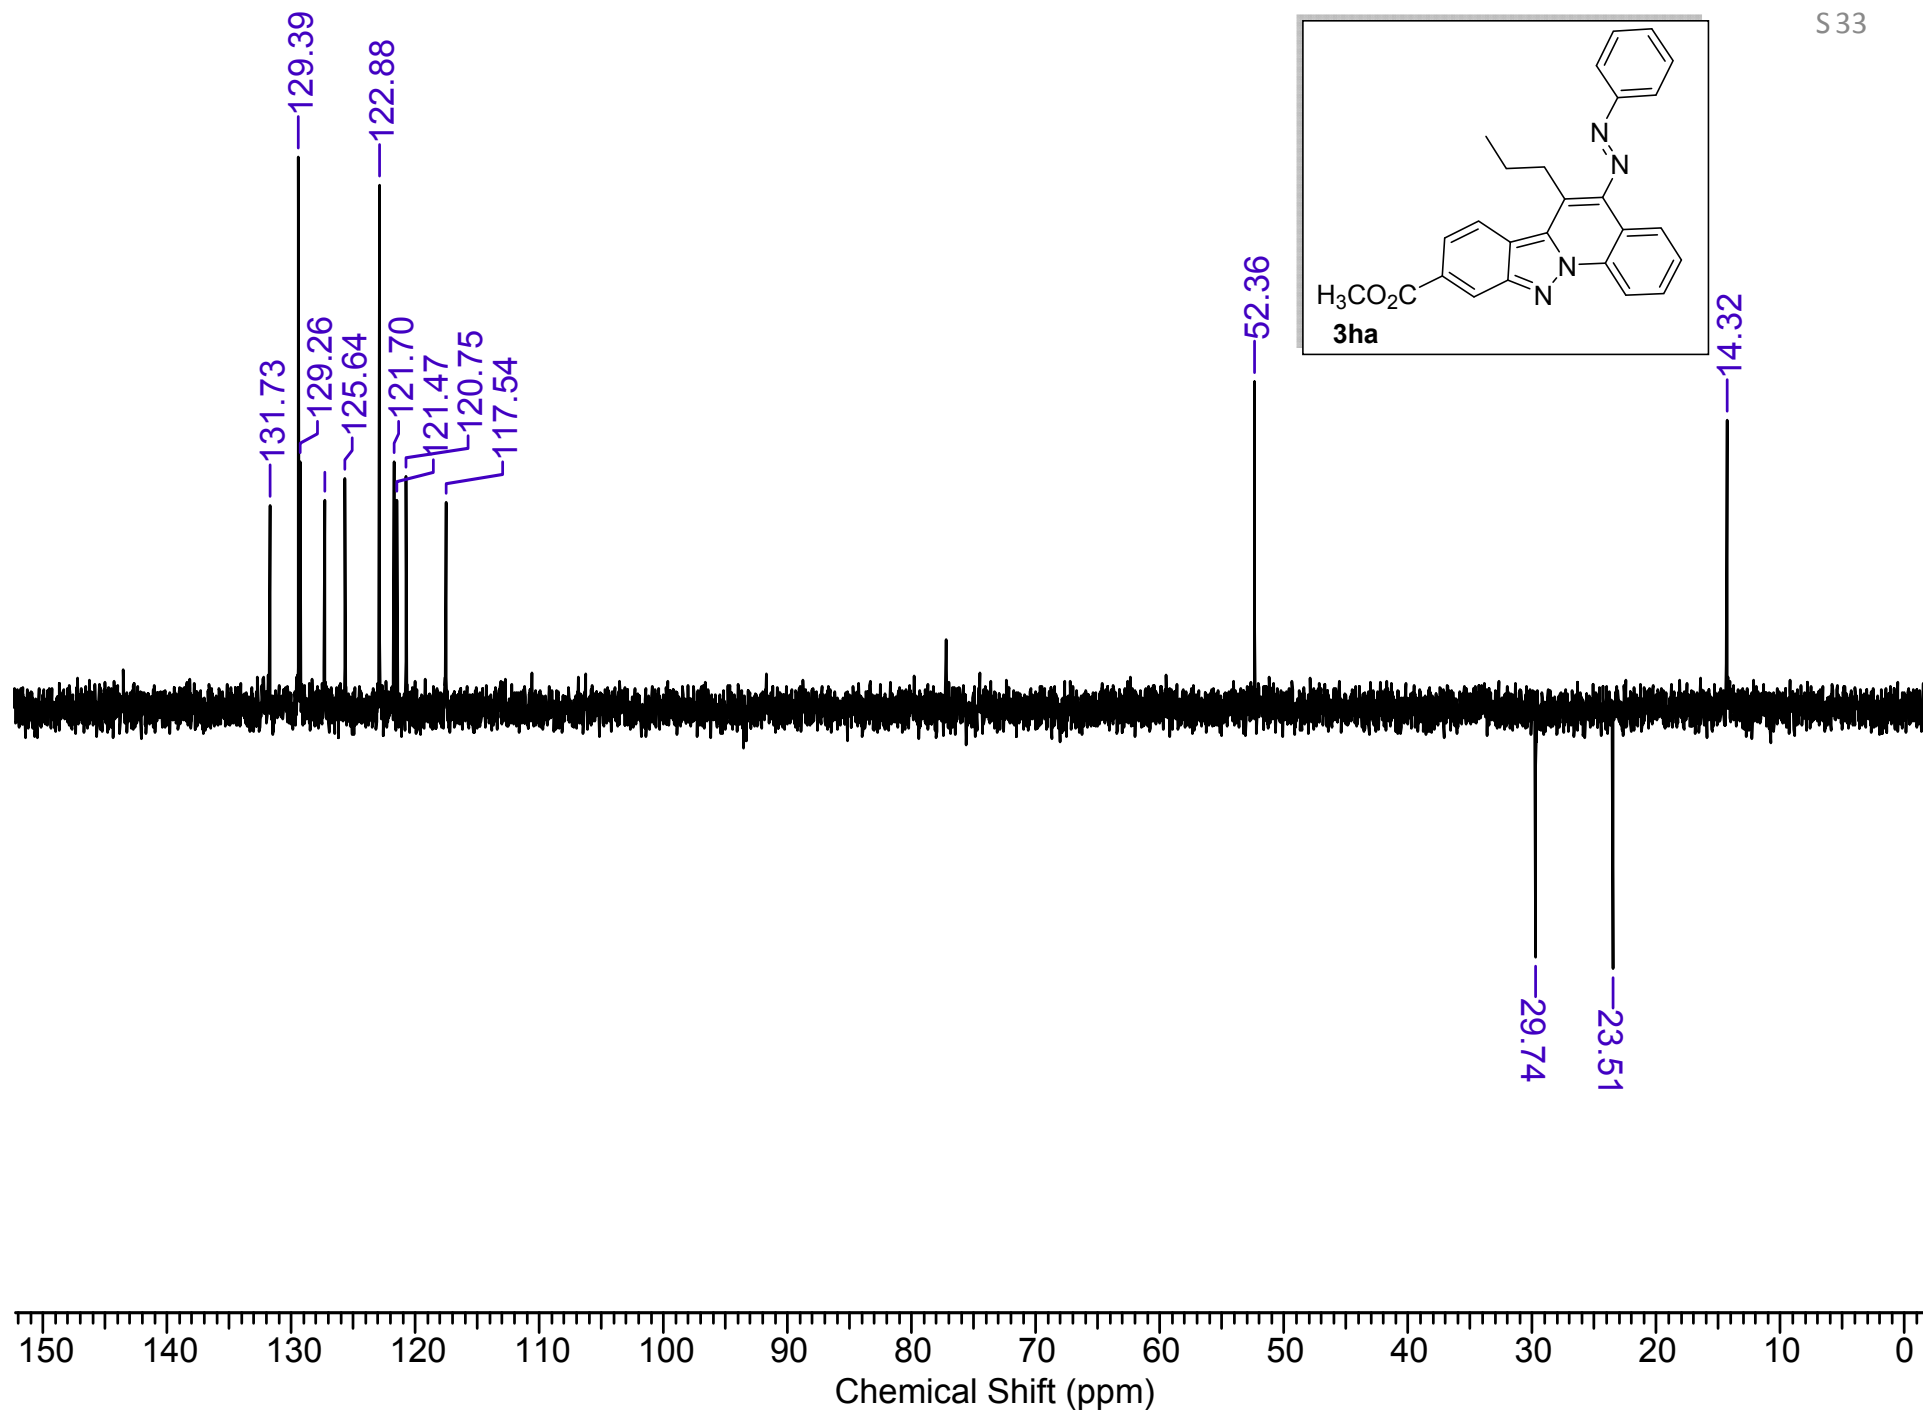

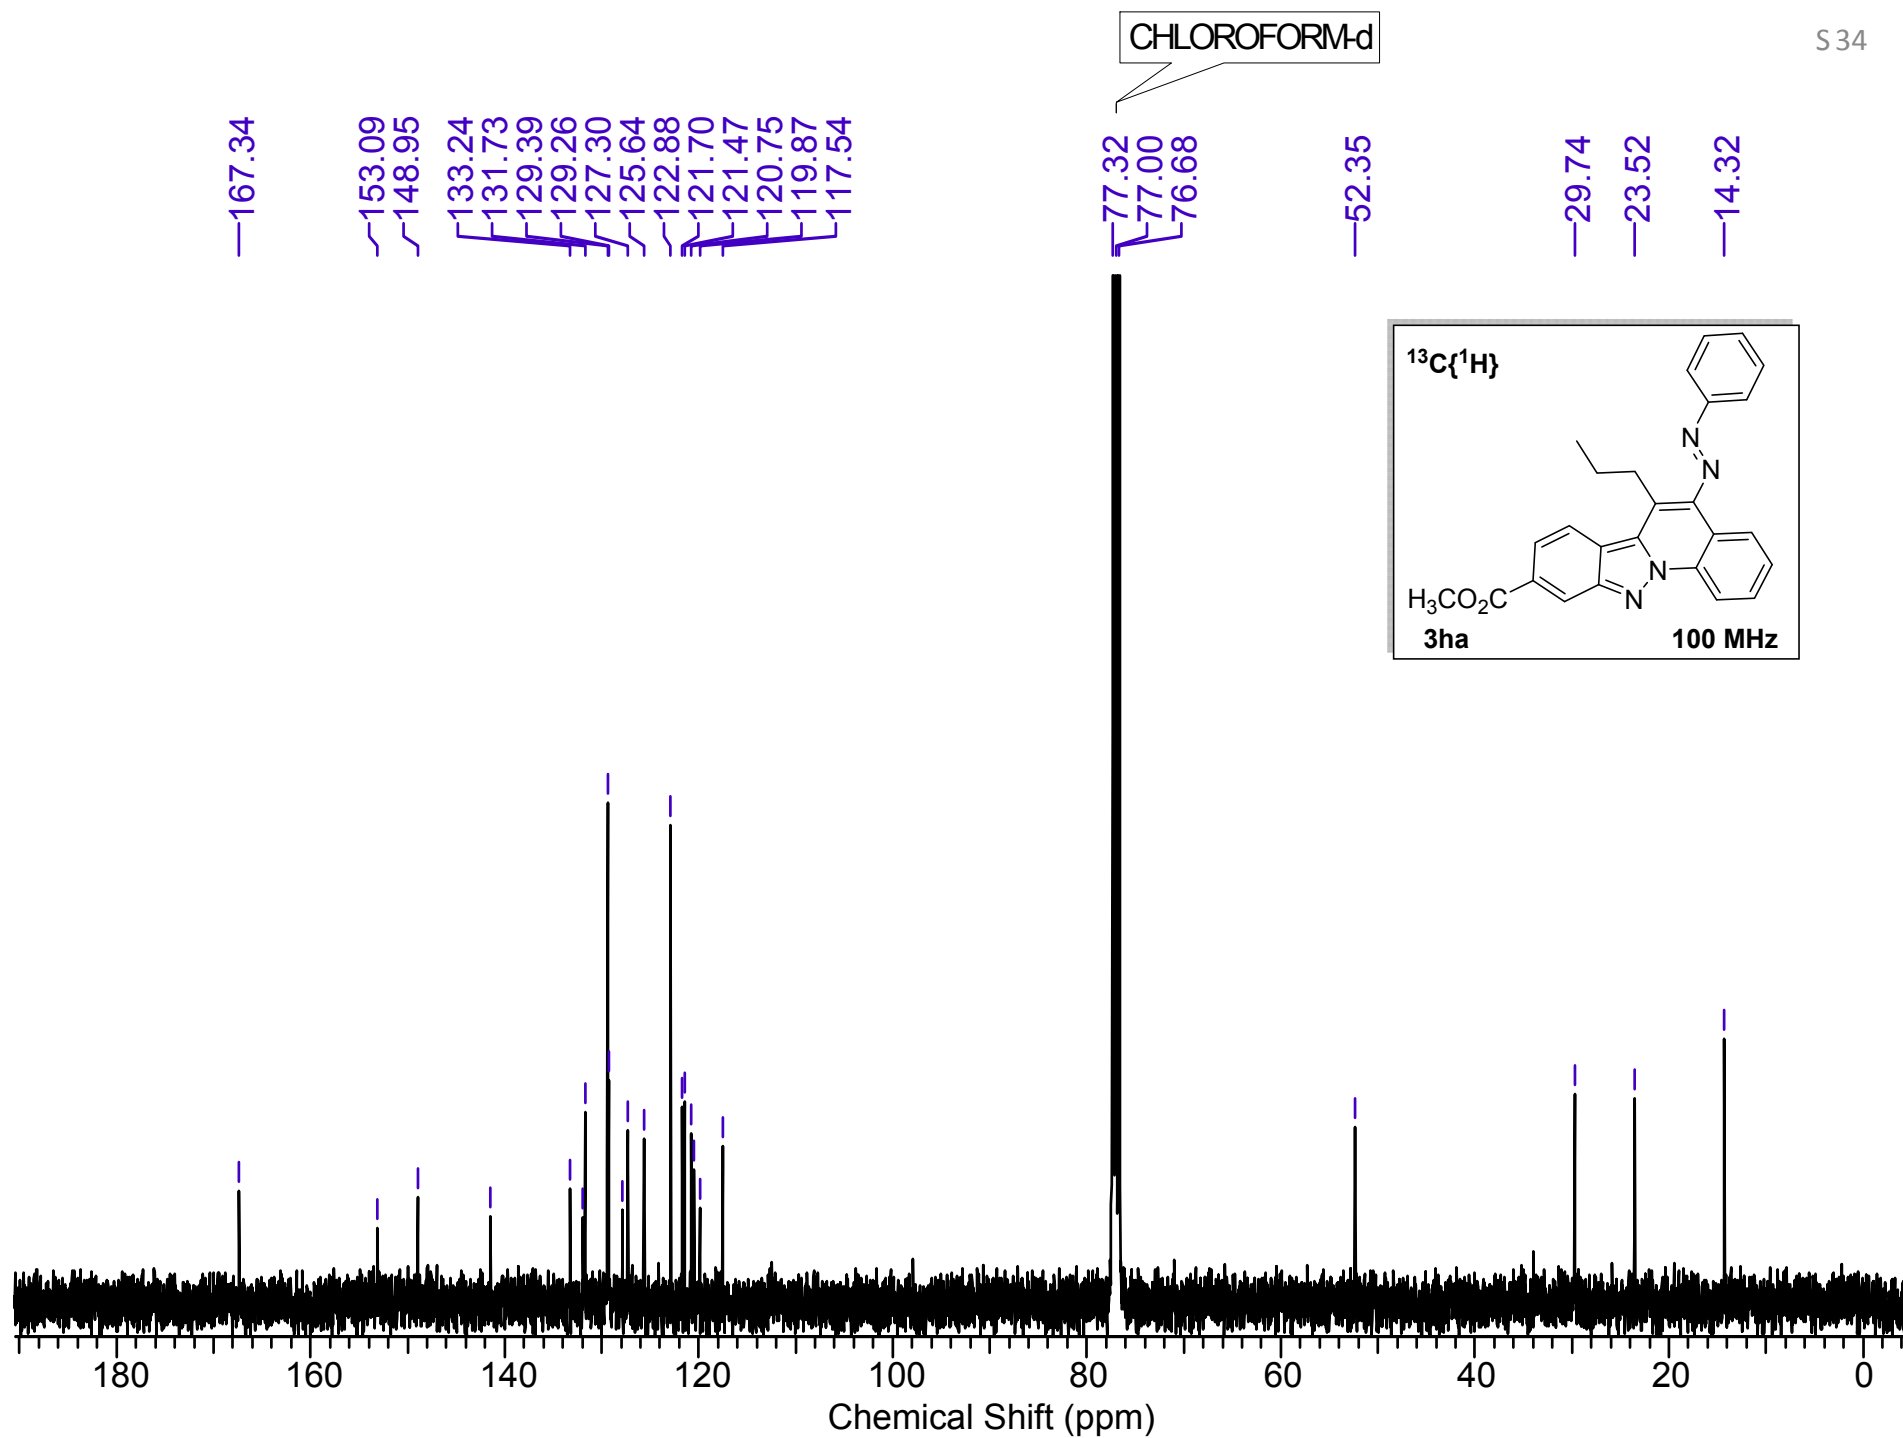

PD-693 #900 RT: 7.66 AV: 1 NL: 7.24E6  
T: FTMS + p ESI Full ms [100.0000-1500.0000]

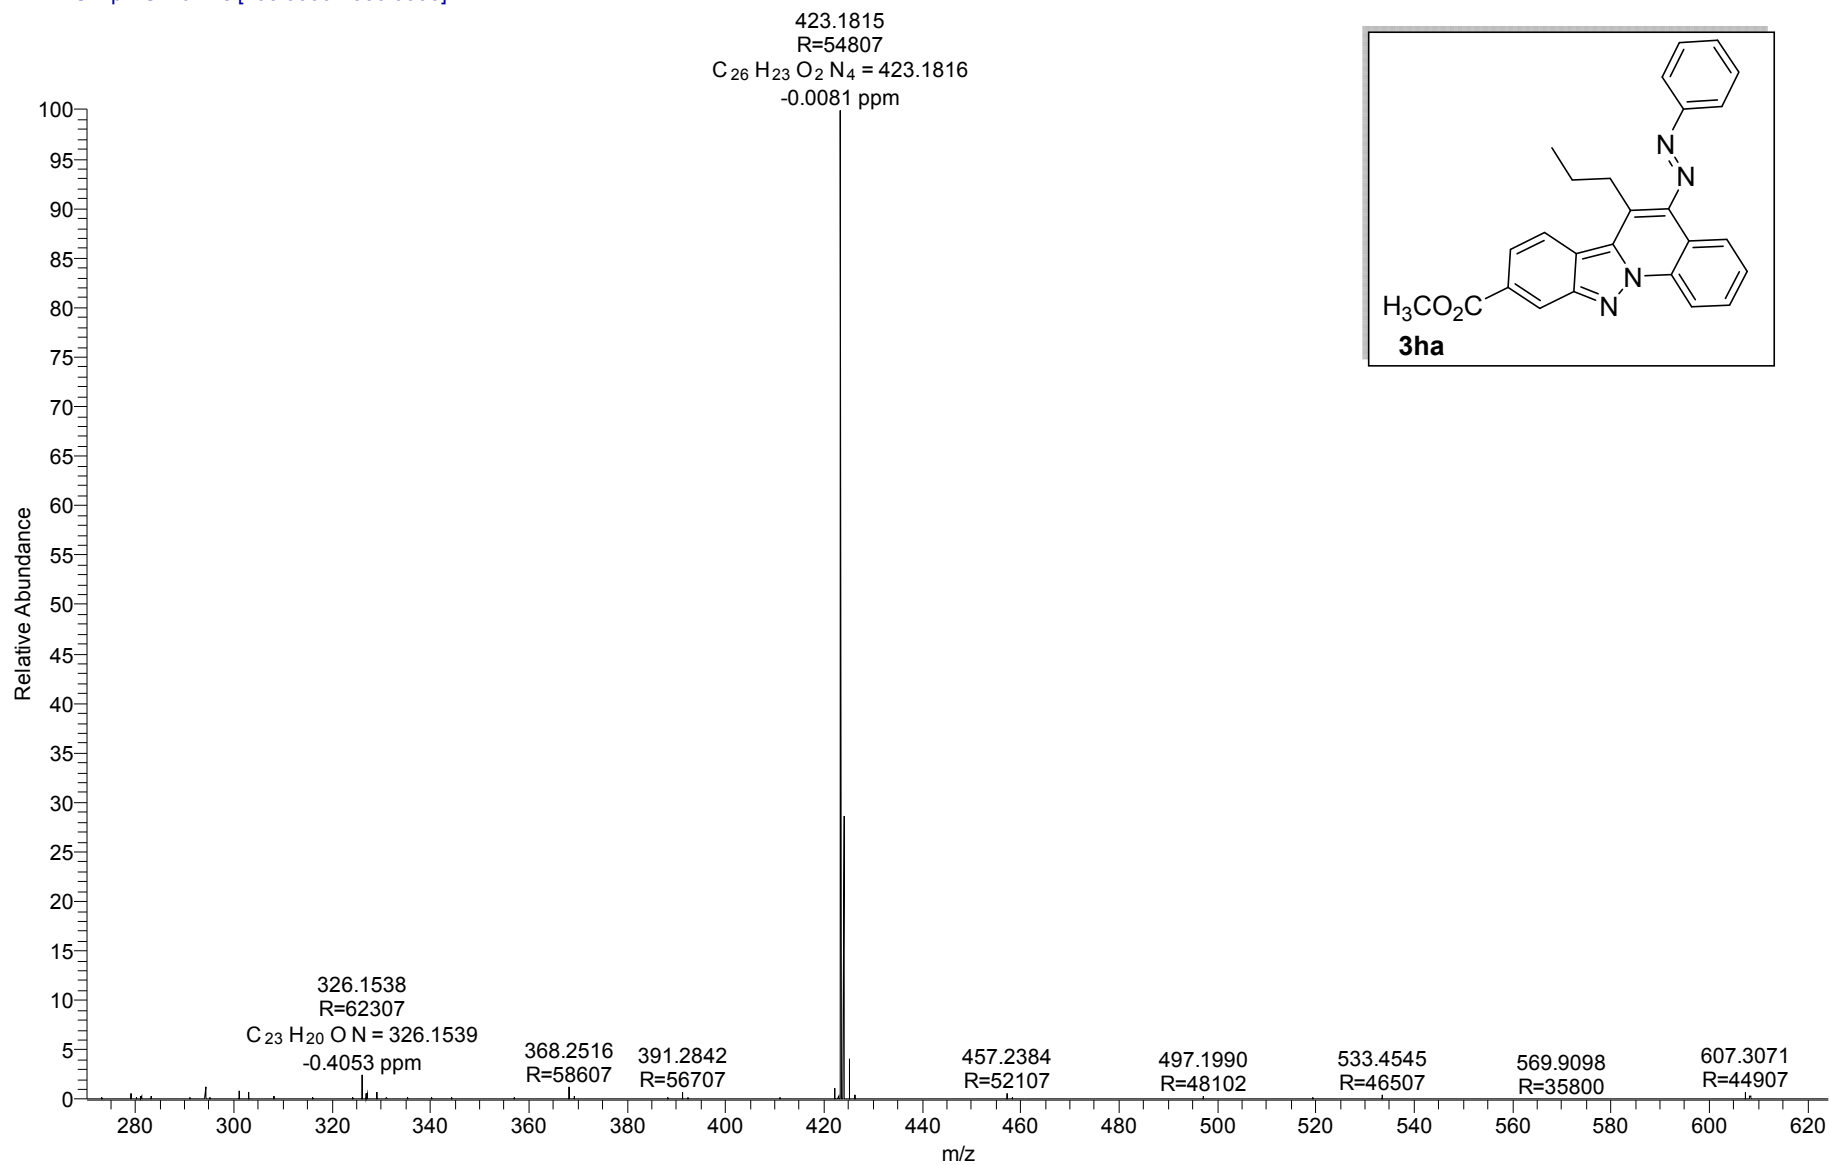

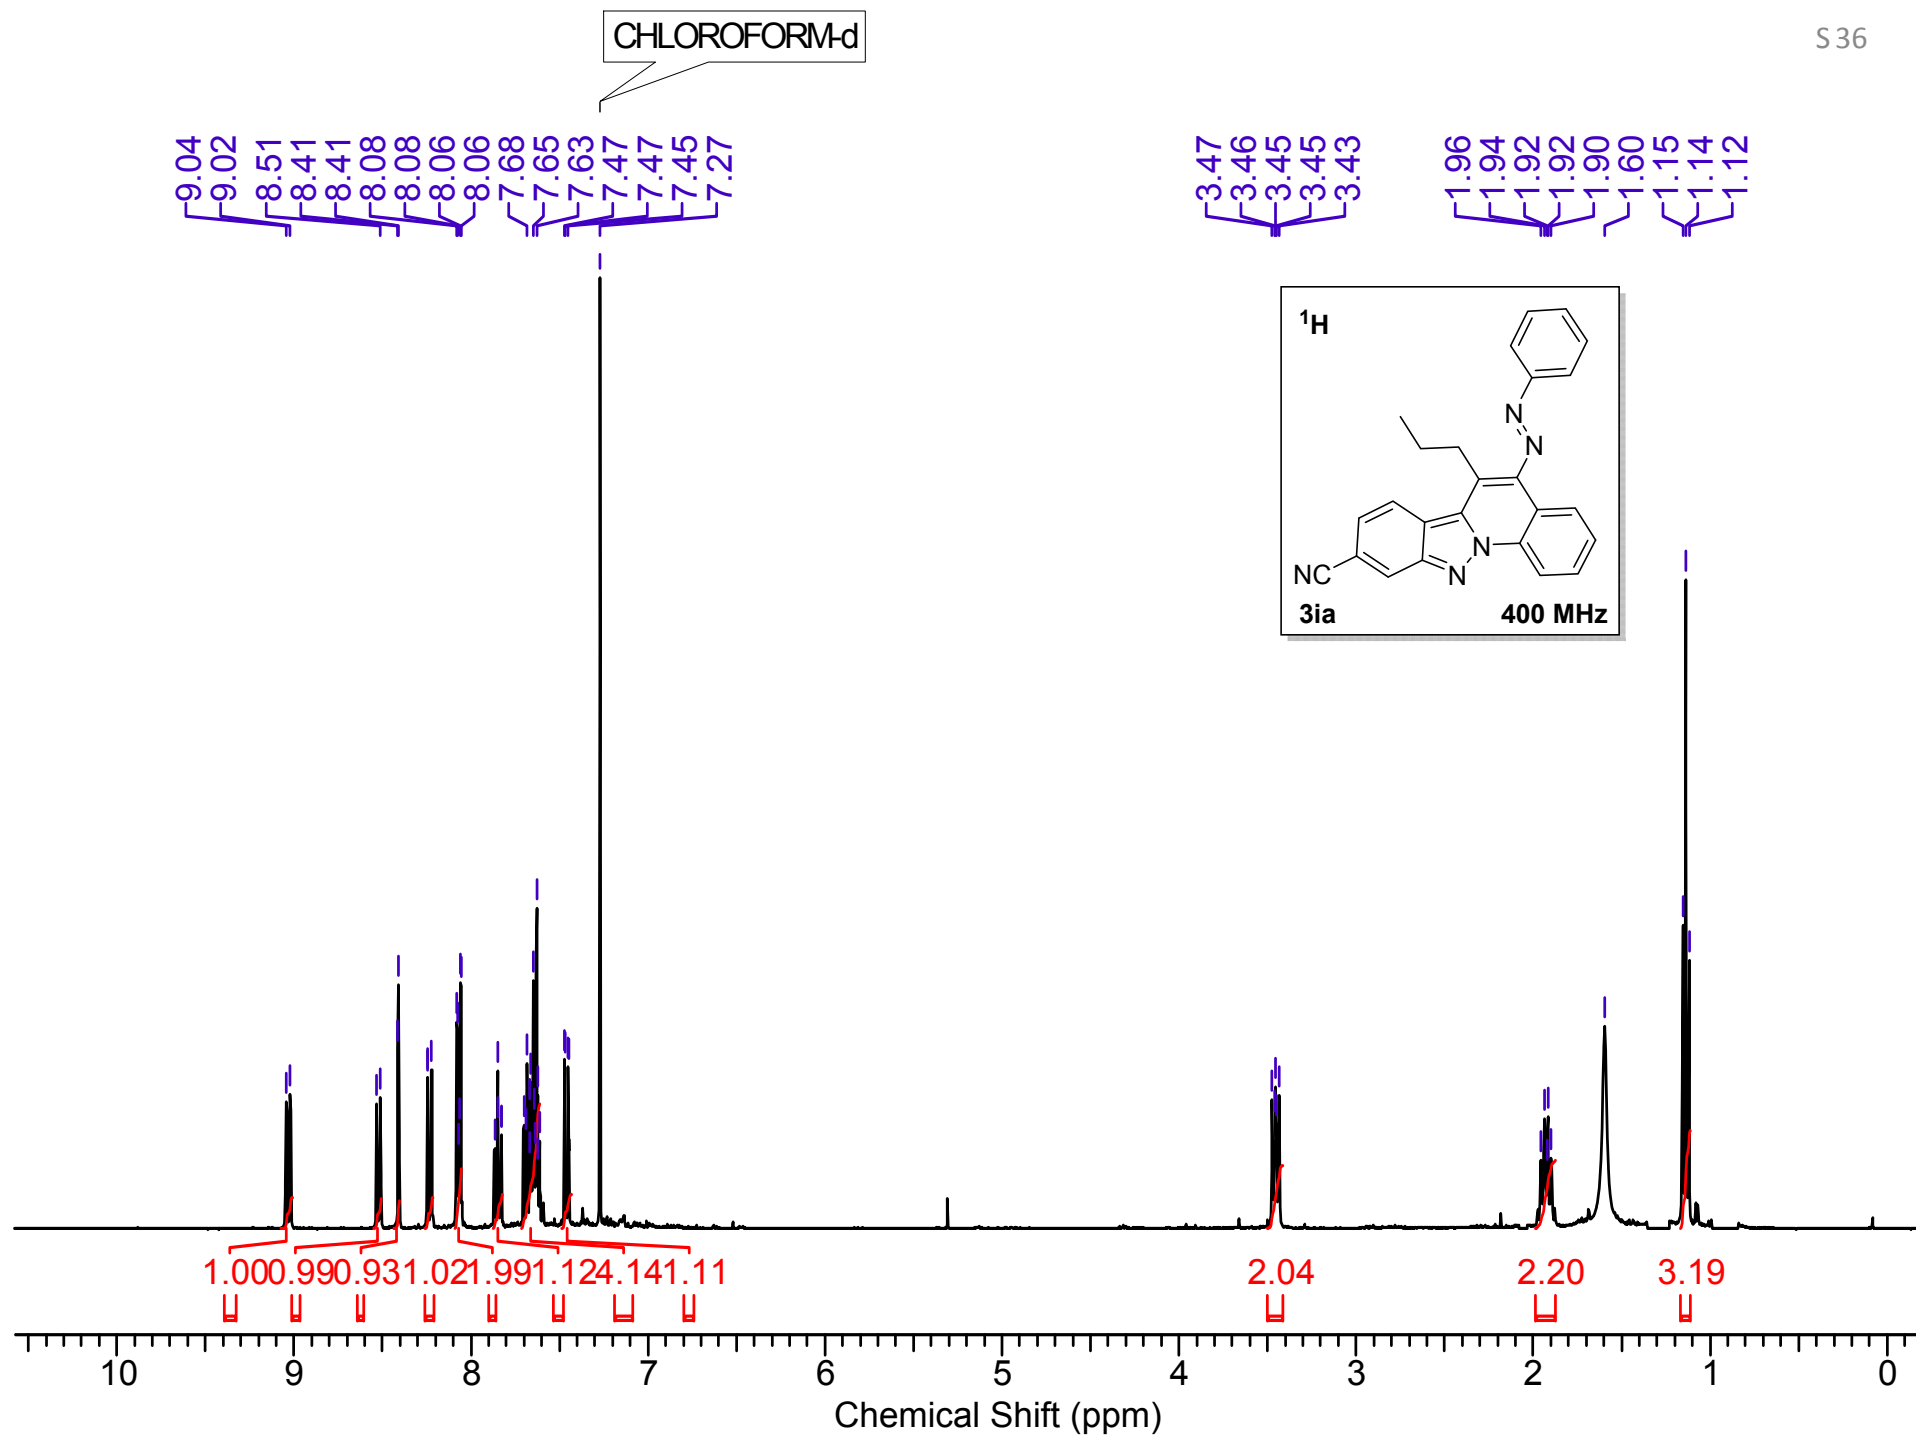

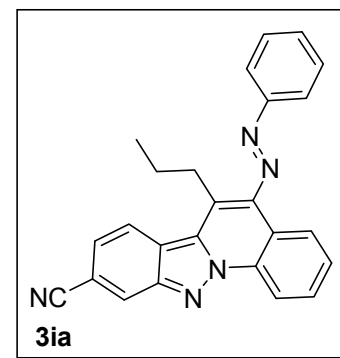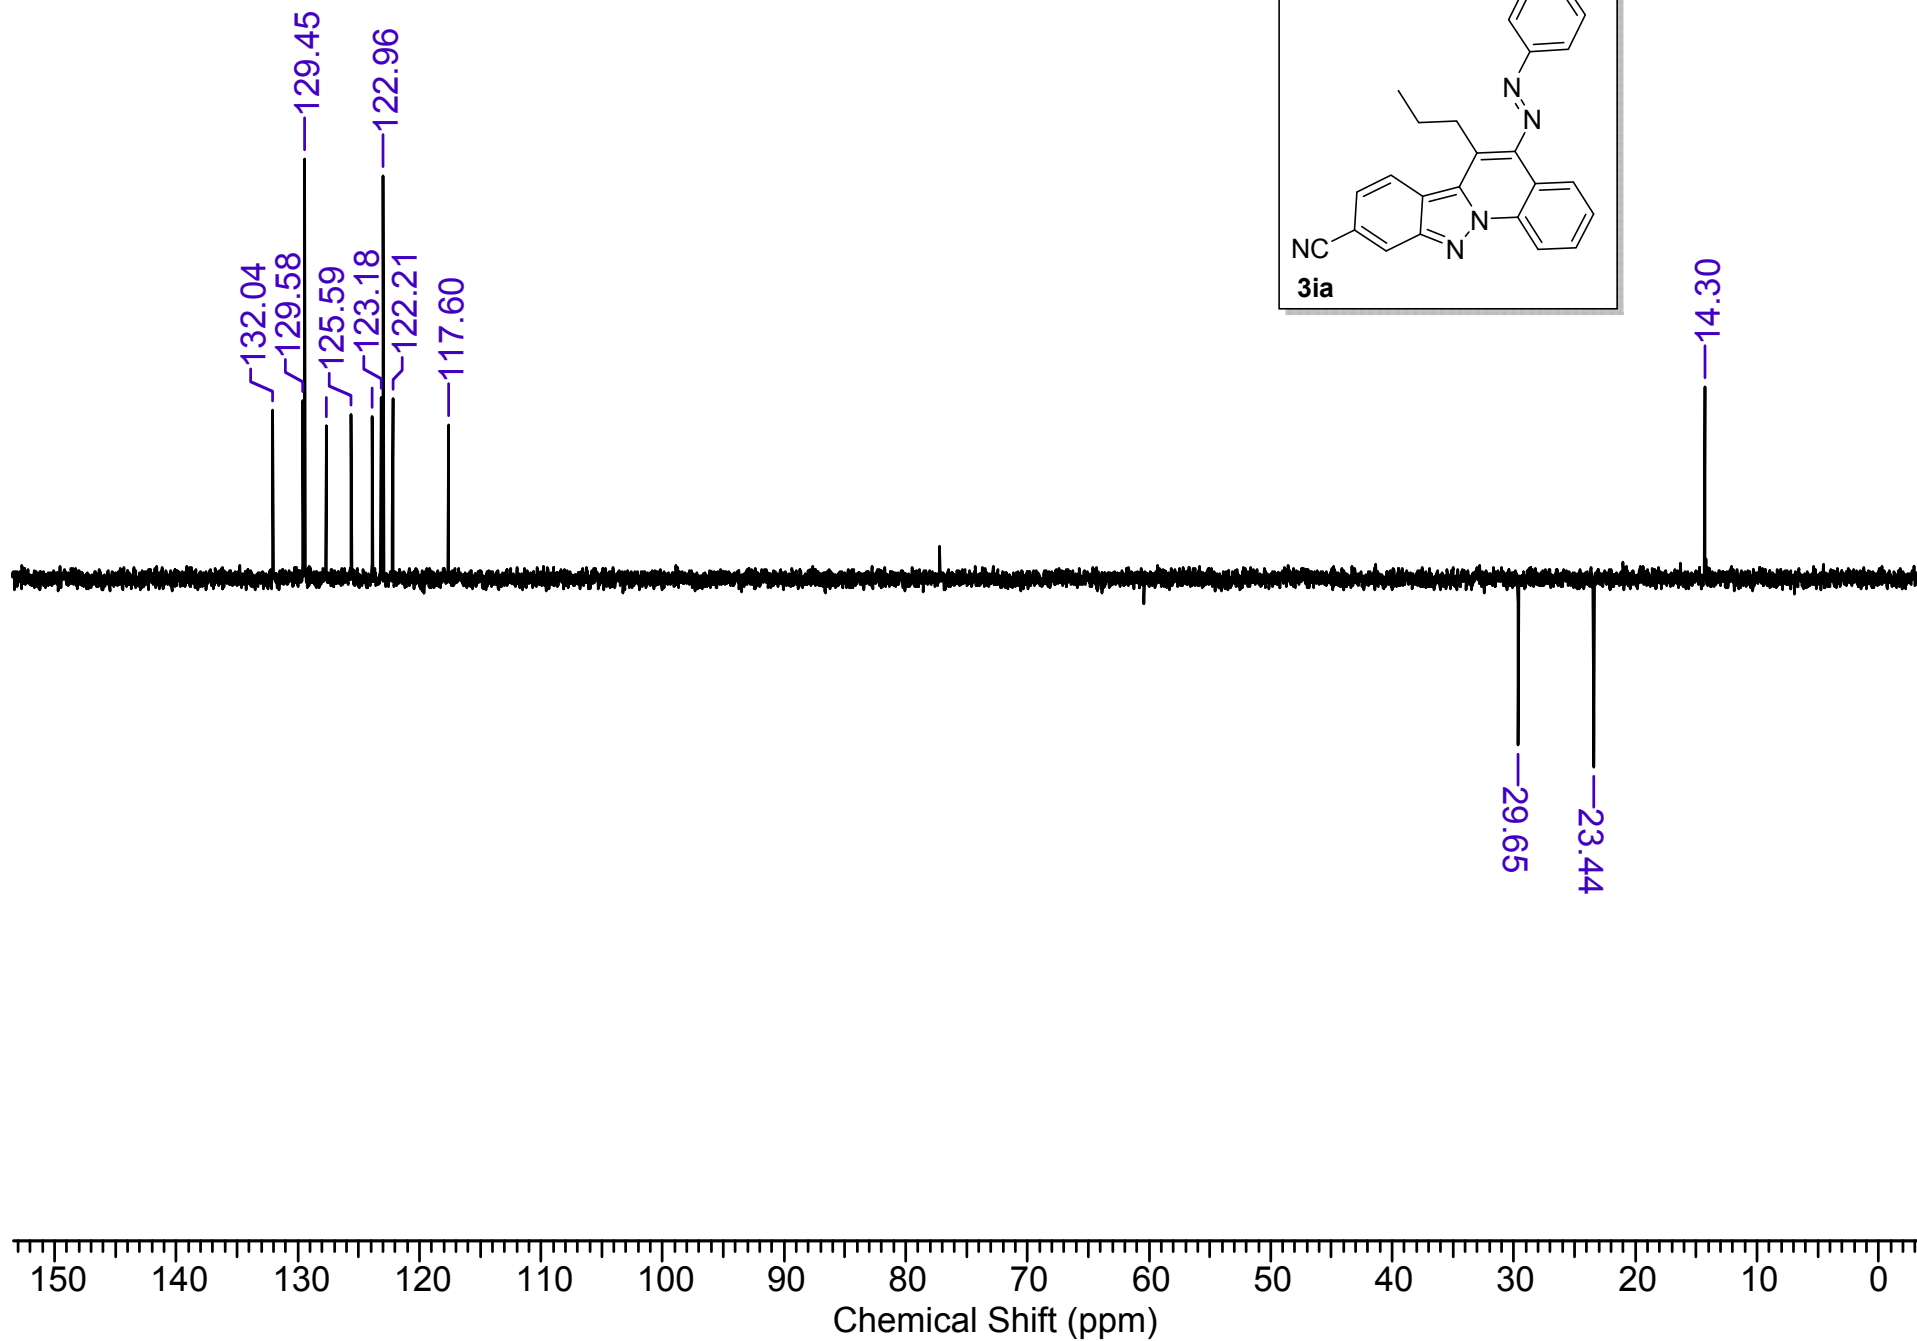

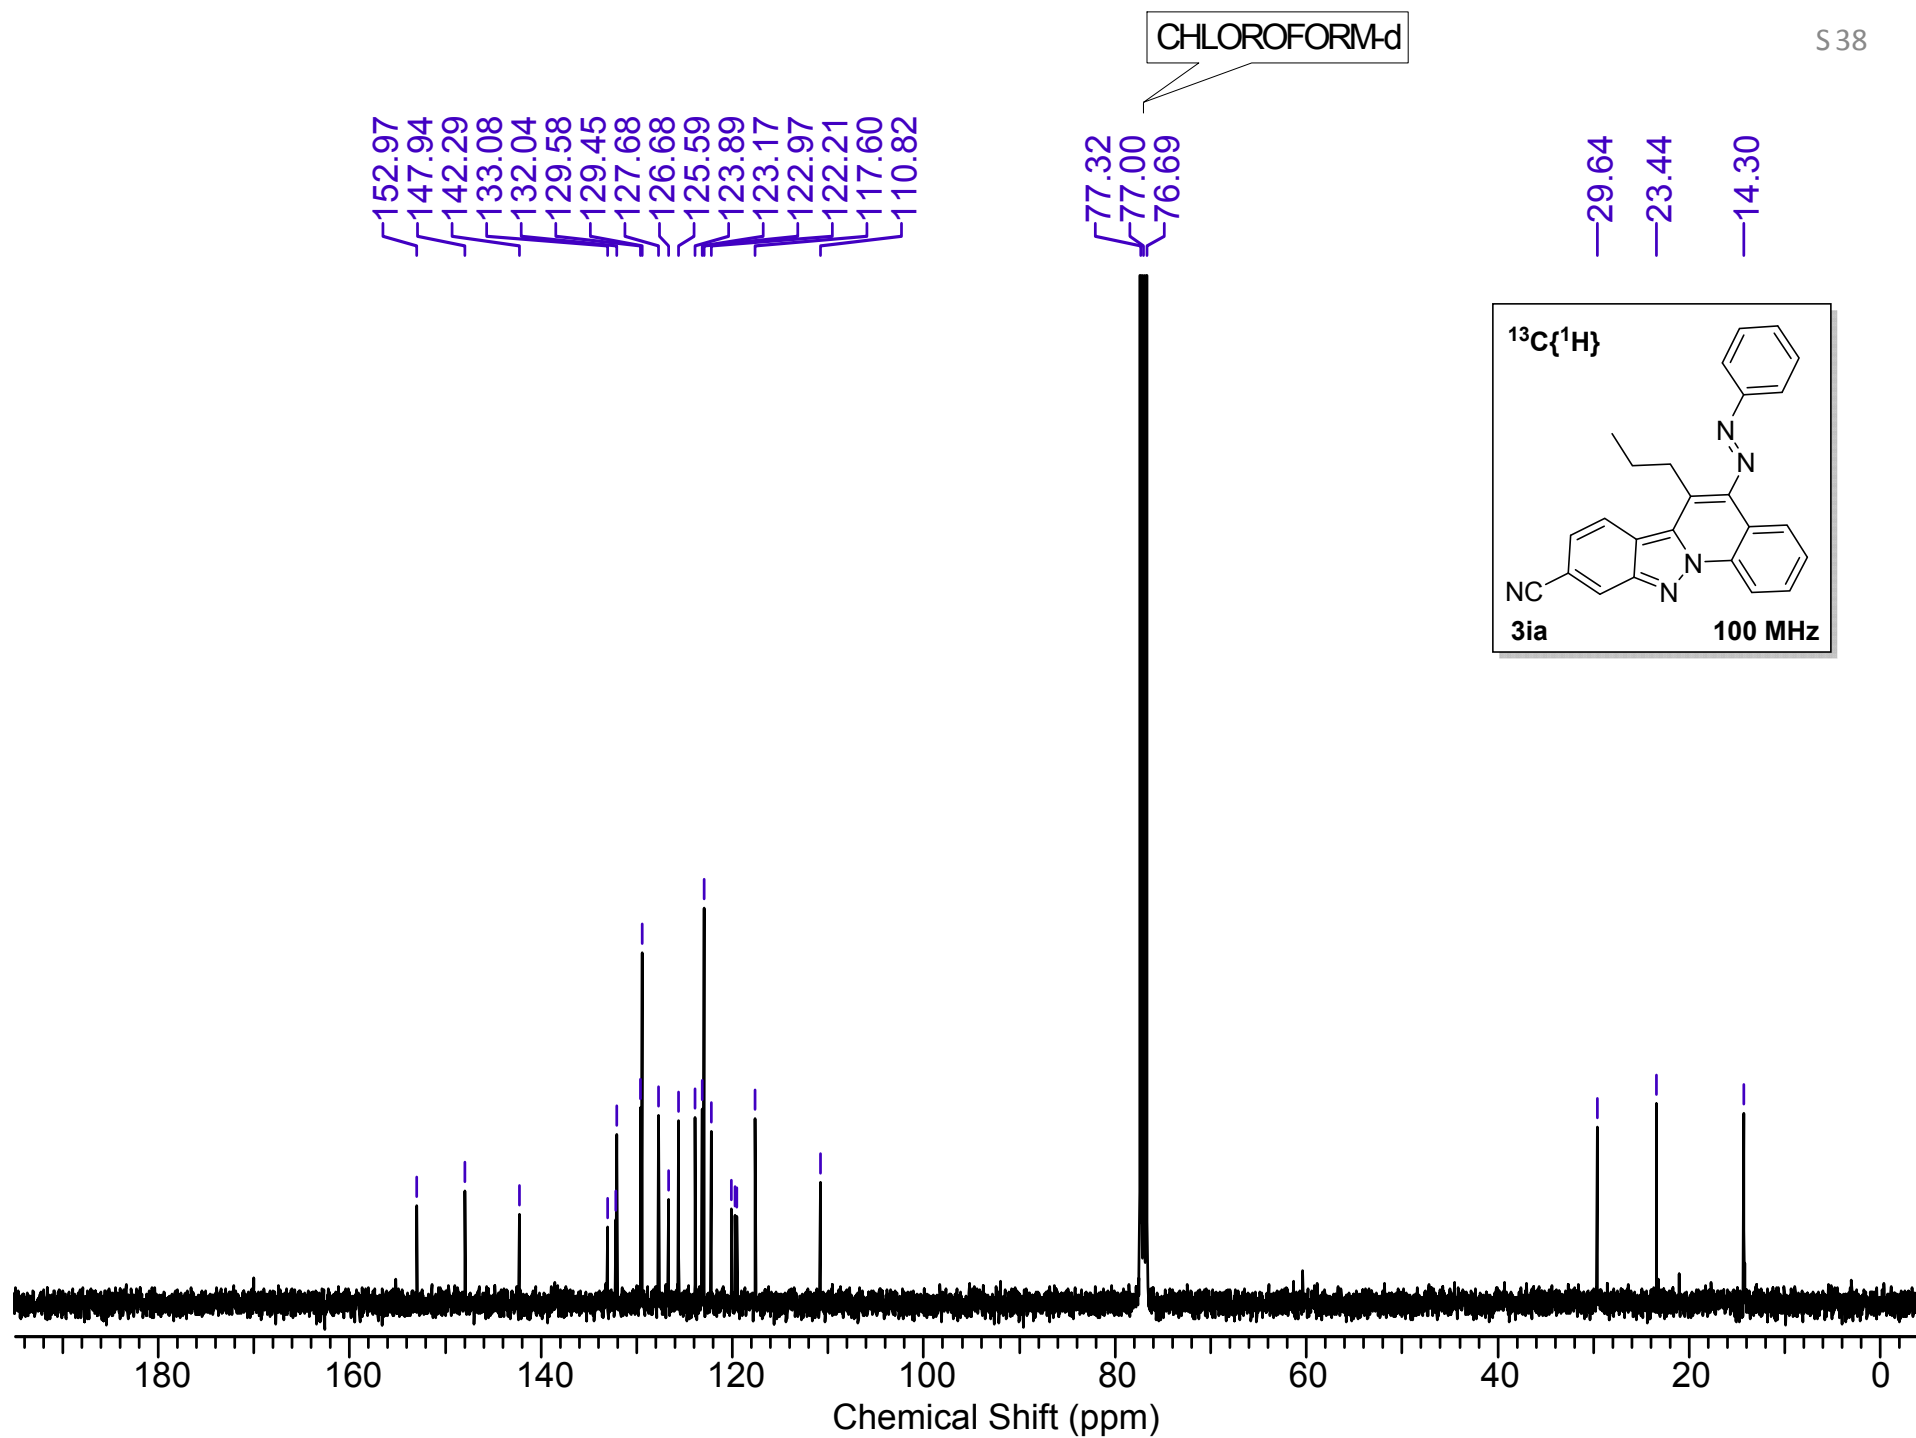

PSD-829 #747 RT: 4.48 AV: 1 NL: 3.78E5  
T: FTMS + p ESI Full ms [100.0000-1500.0000]

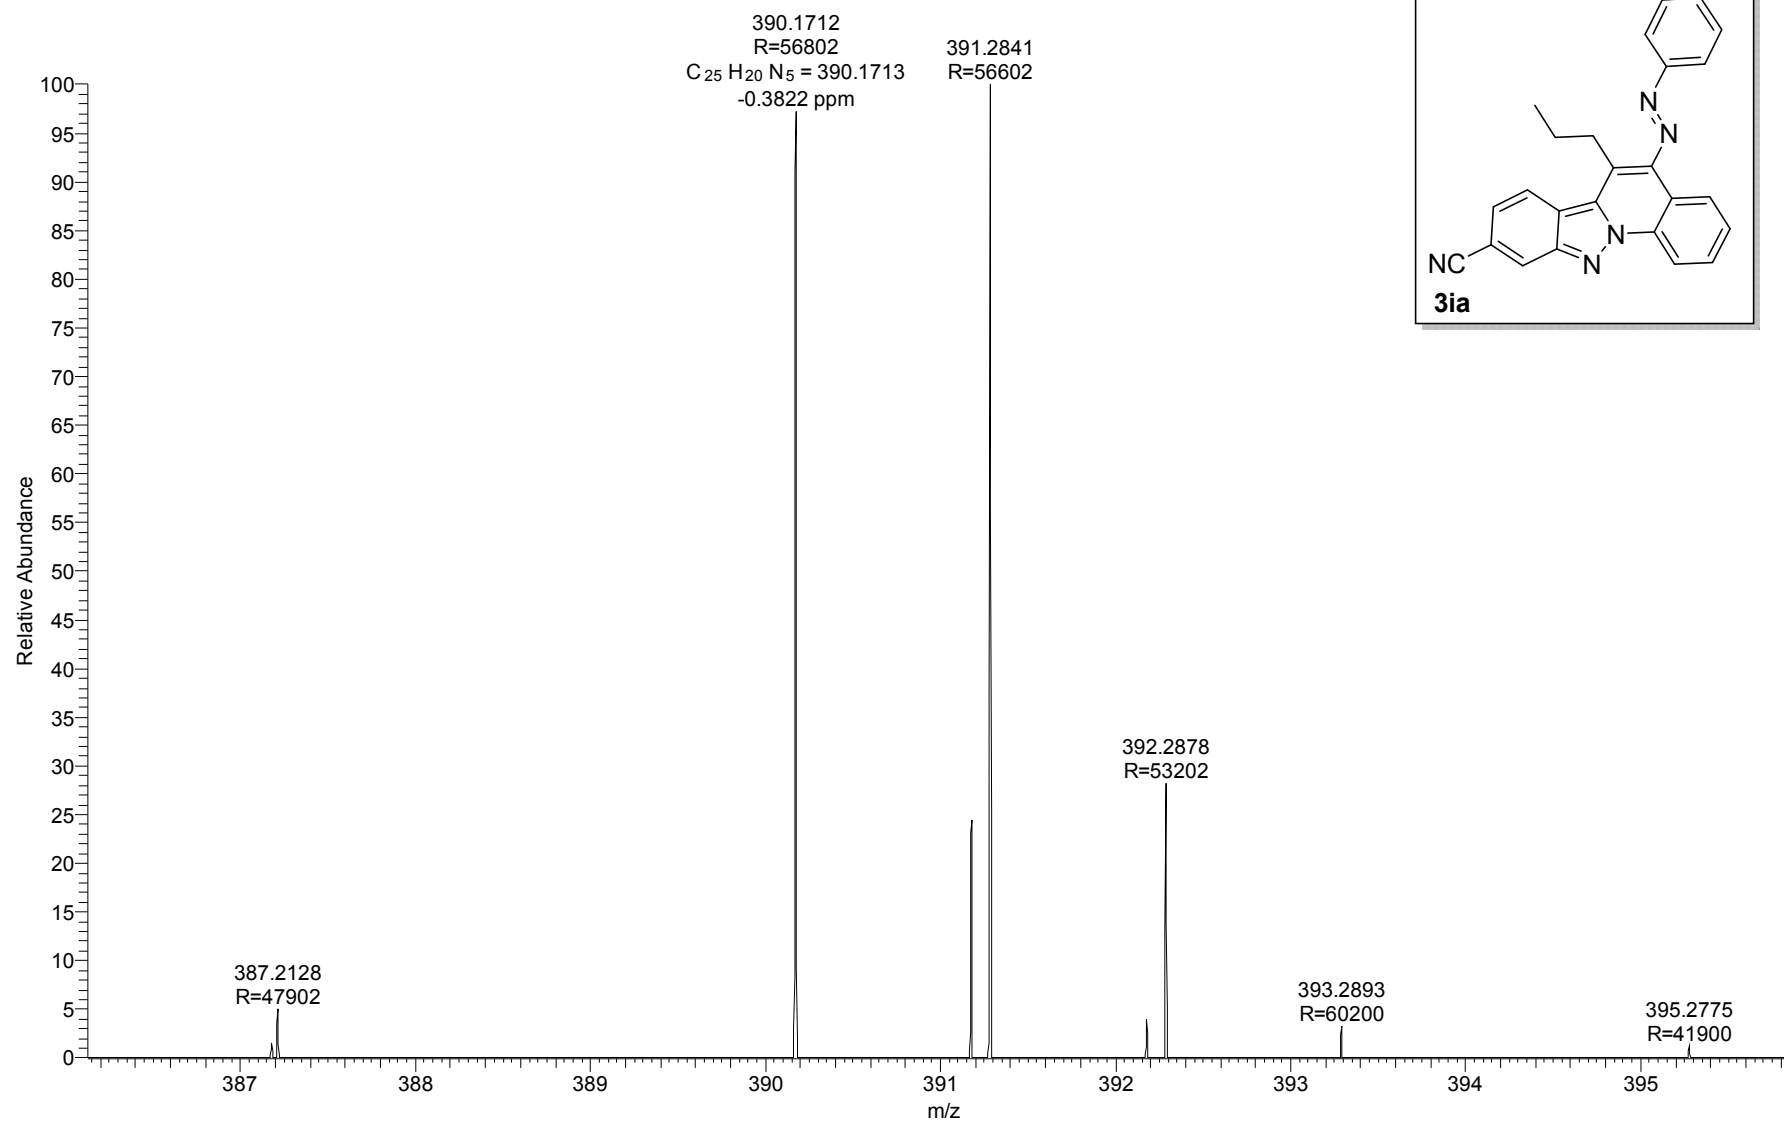

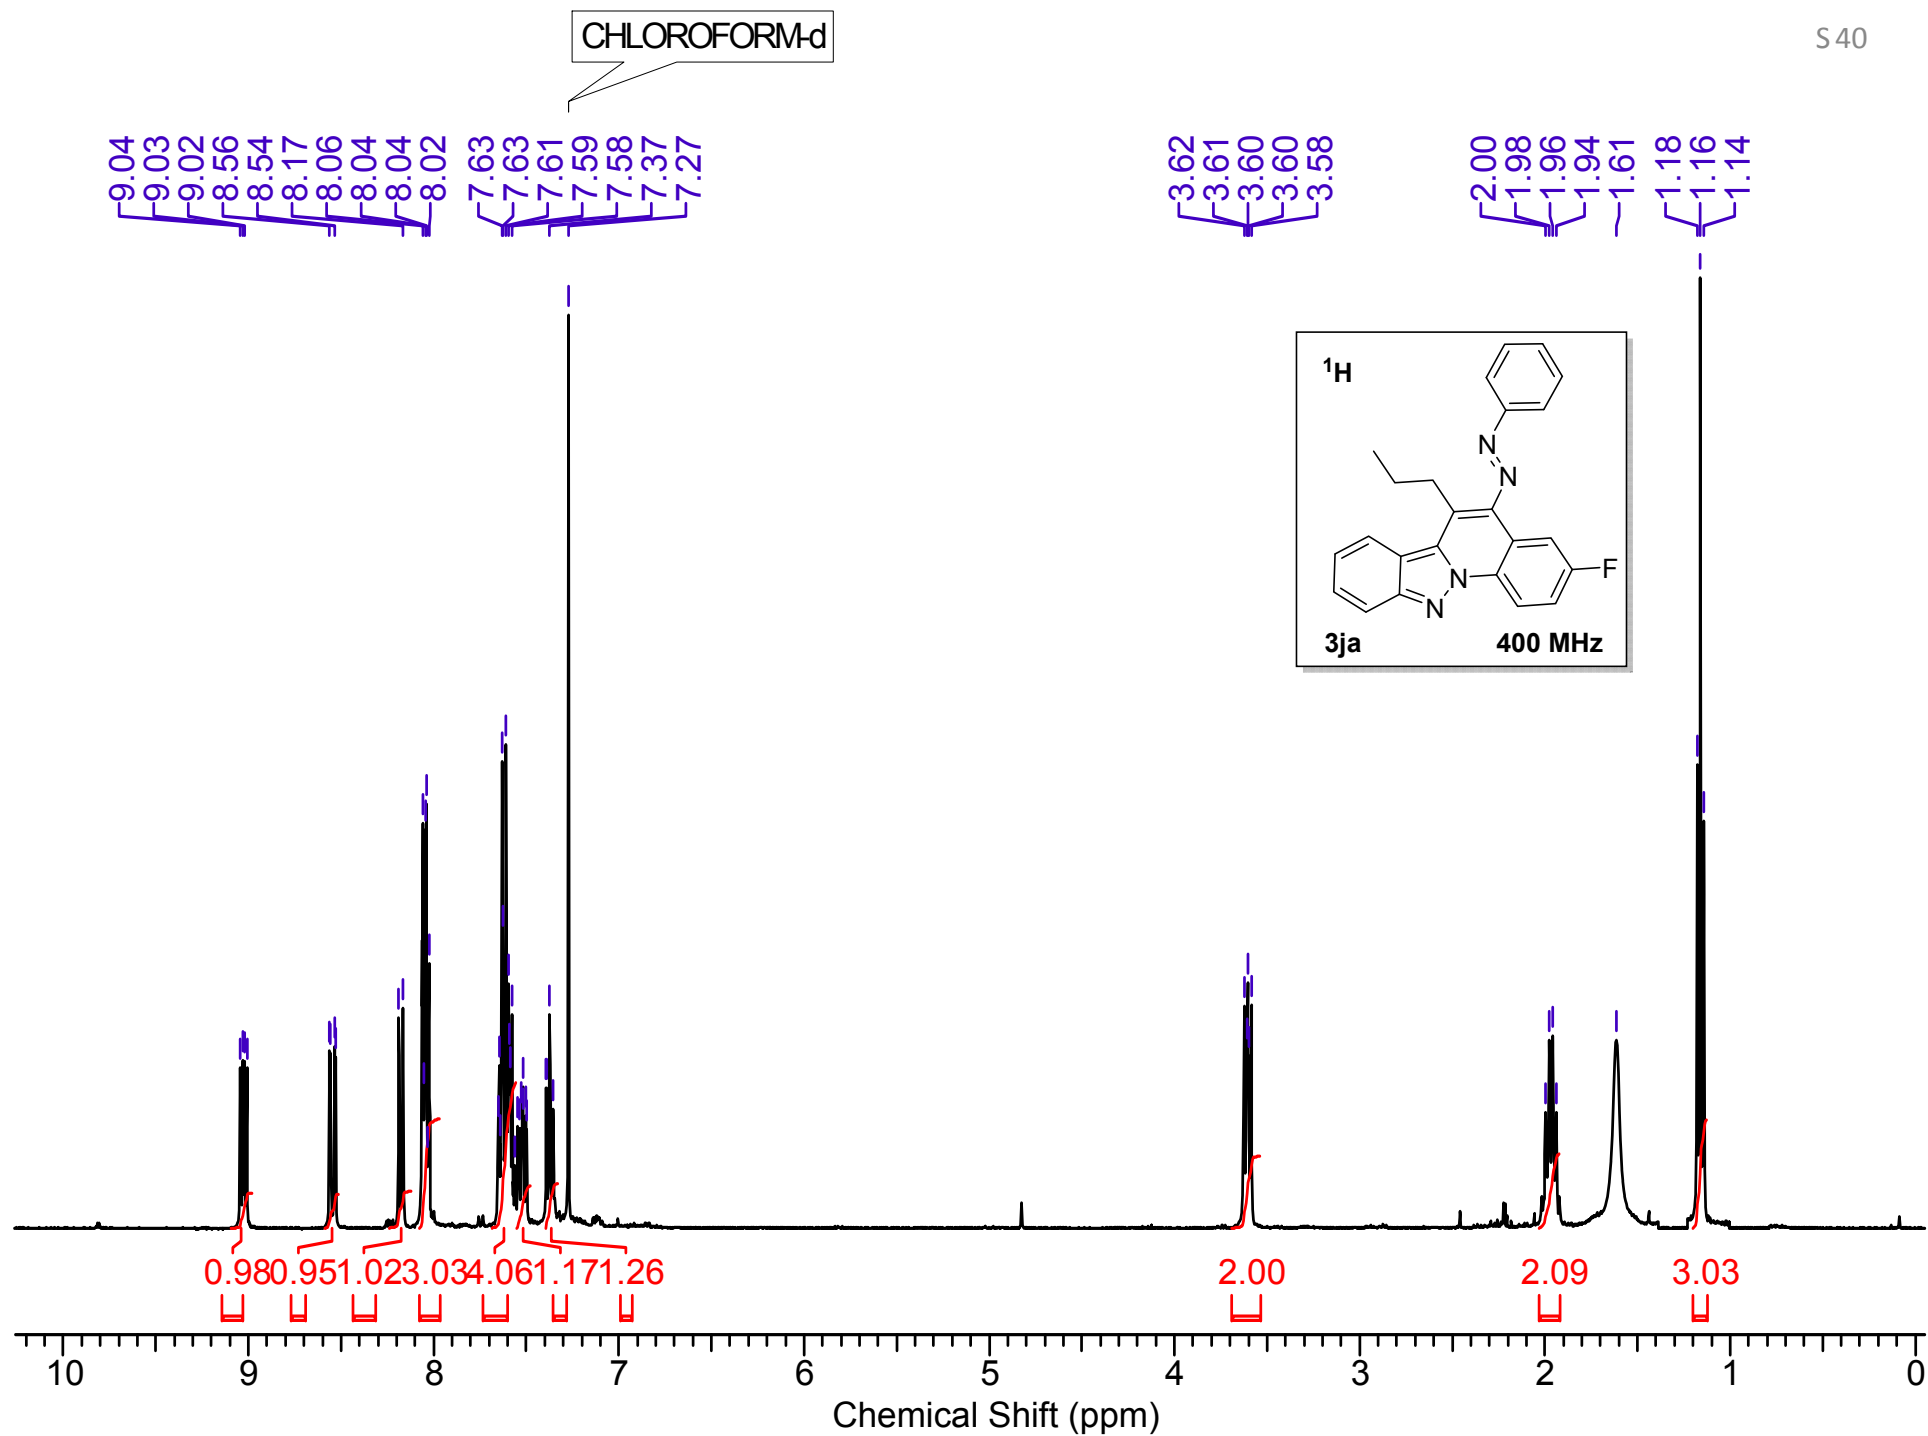



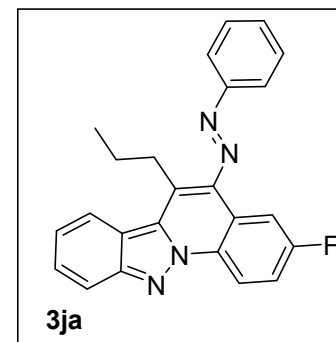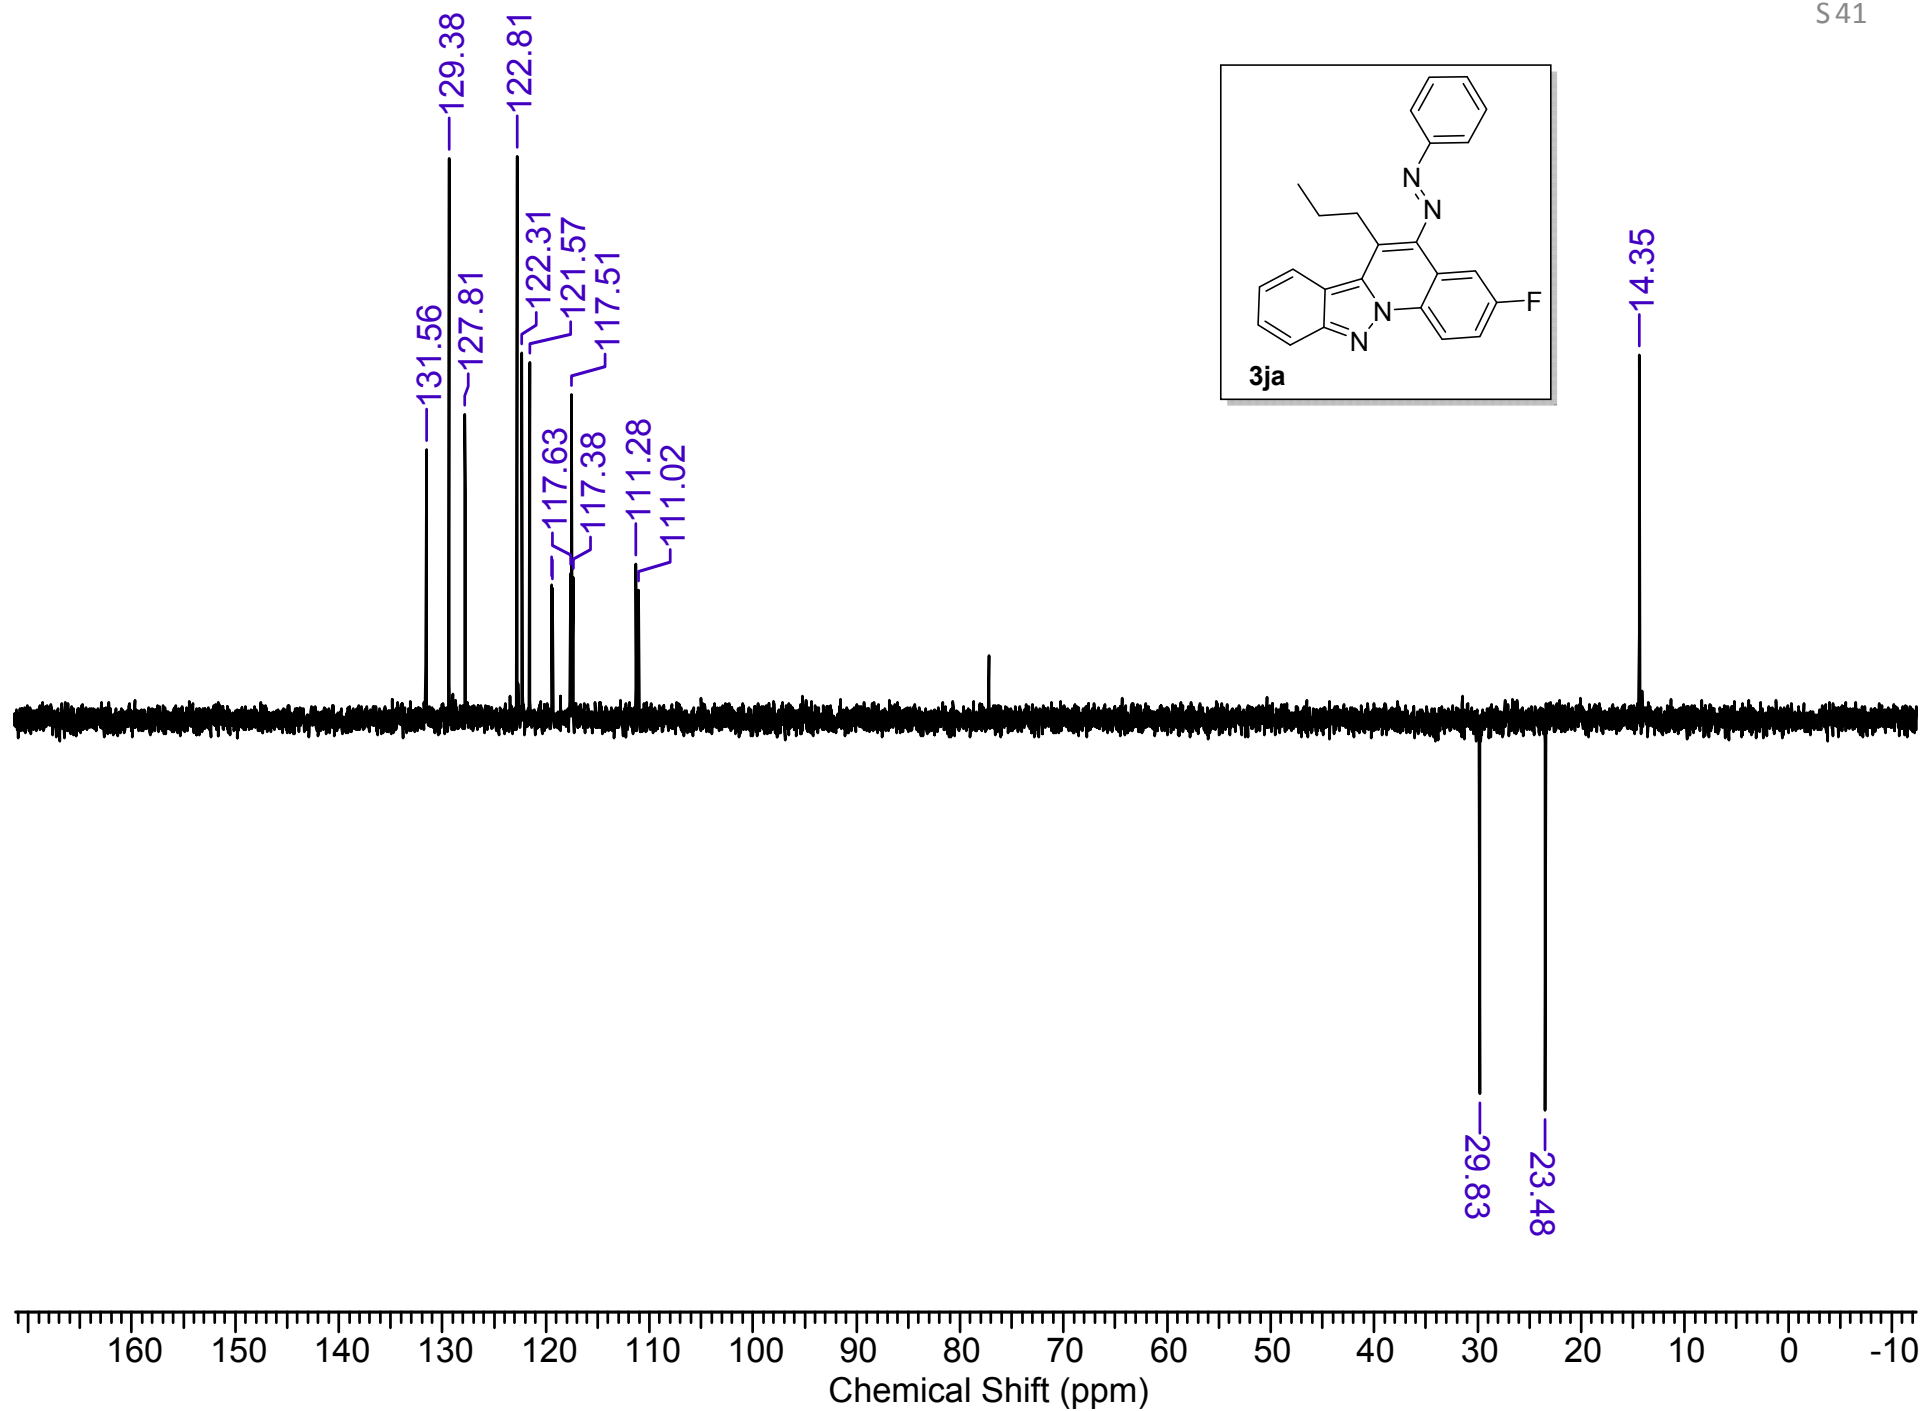

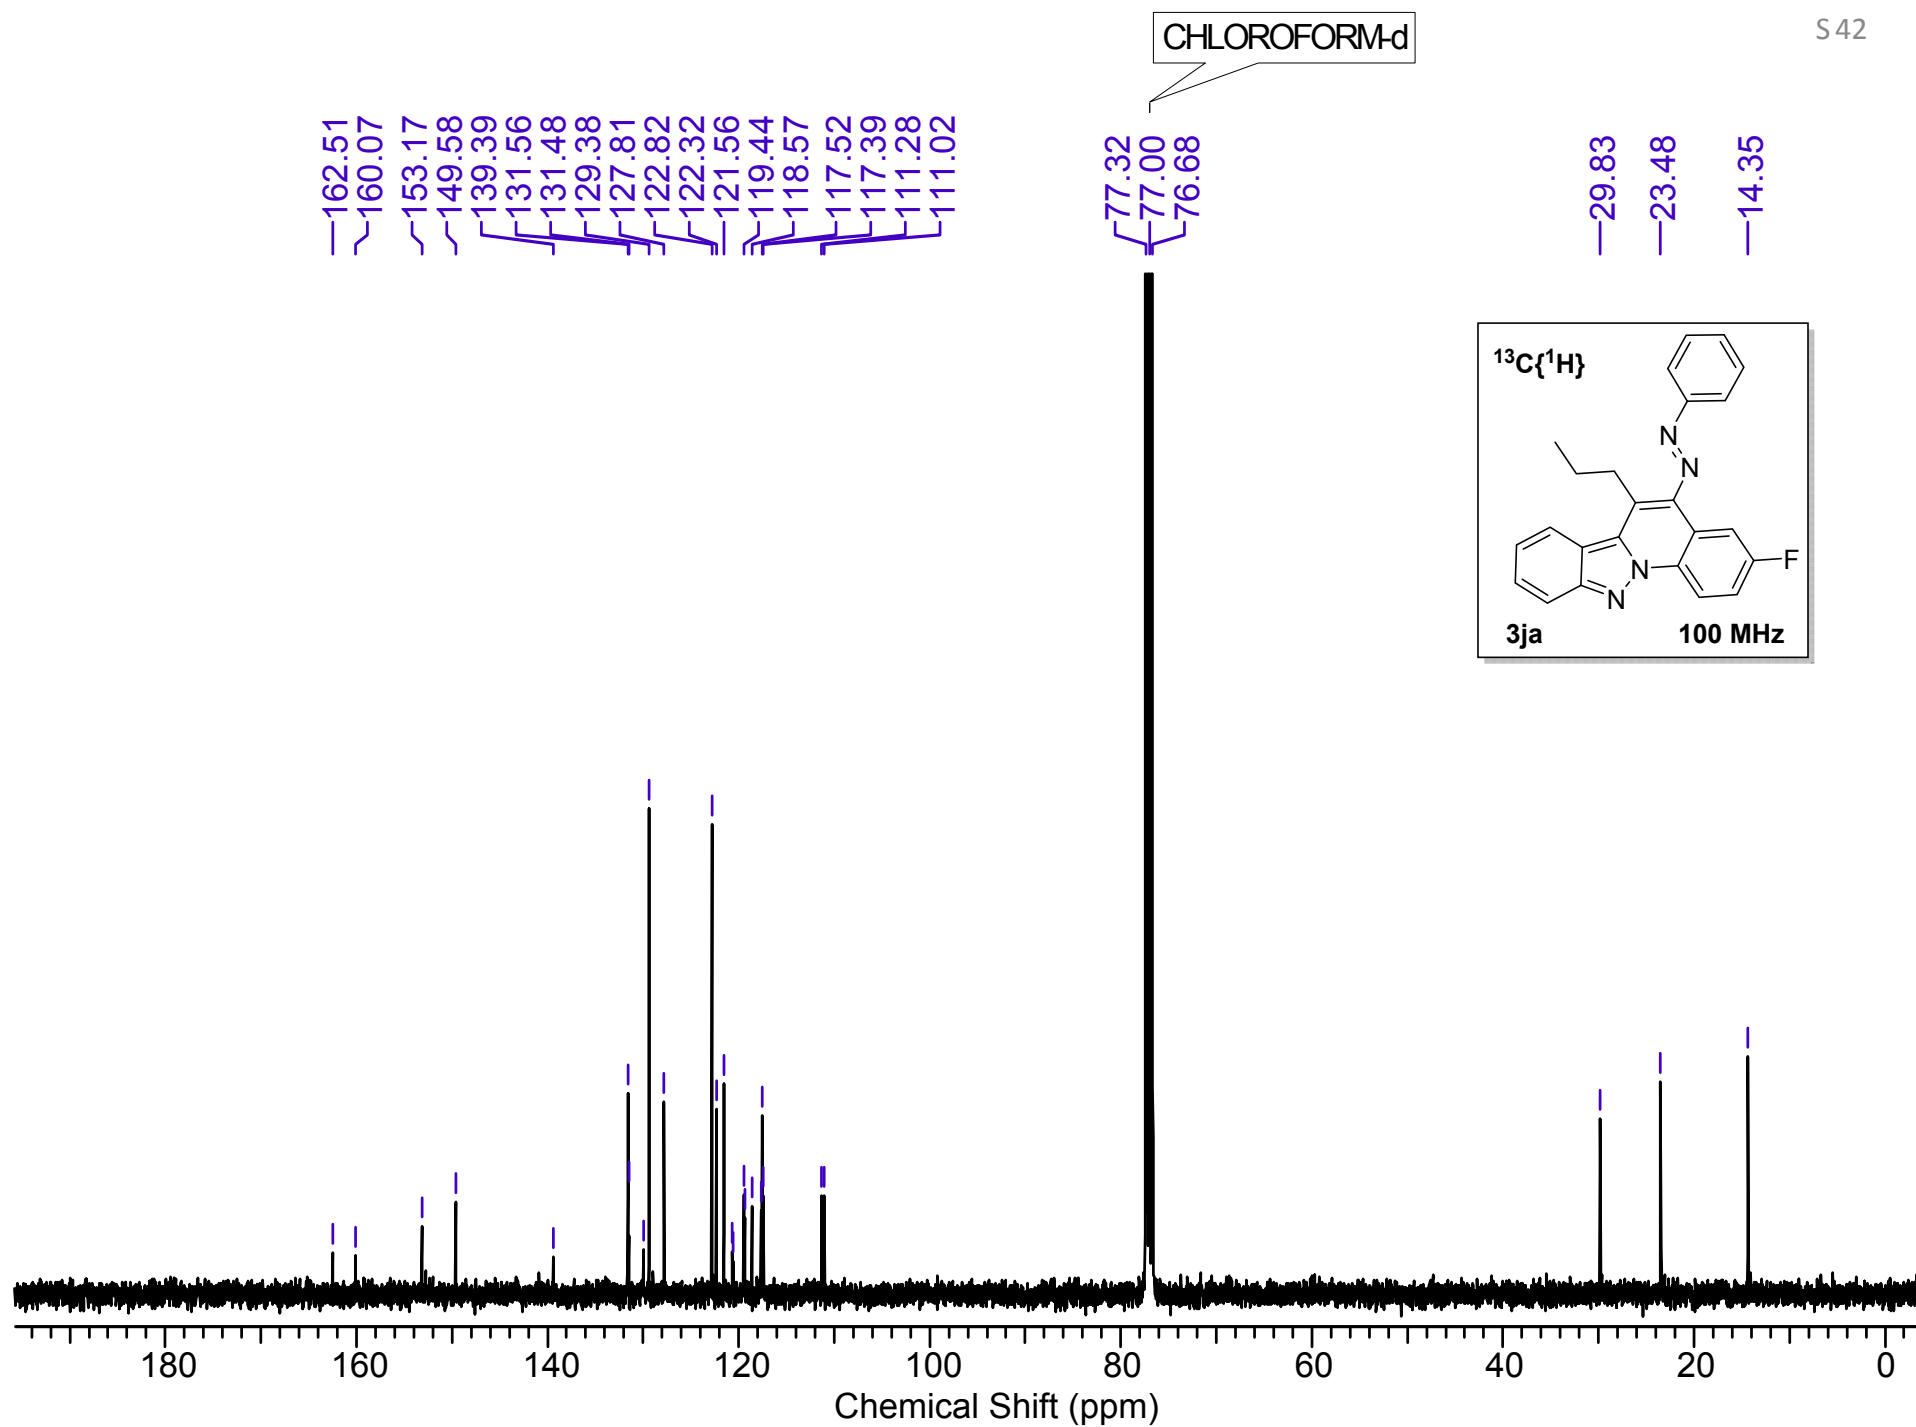

PD-706 #721 RT: 4.35 AV: 1 NL: 2.71E6  
T: FTMS + p ESI Full ms [100.0000-1500.0000]

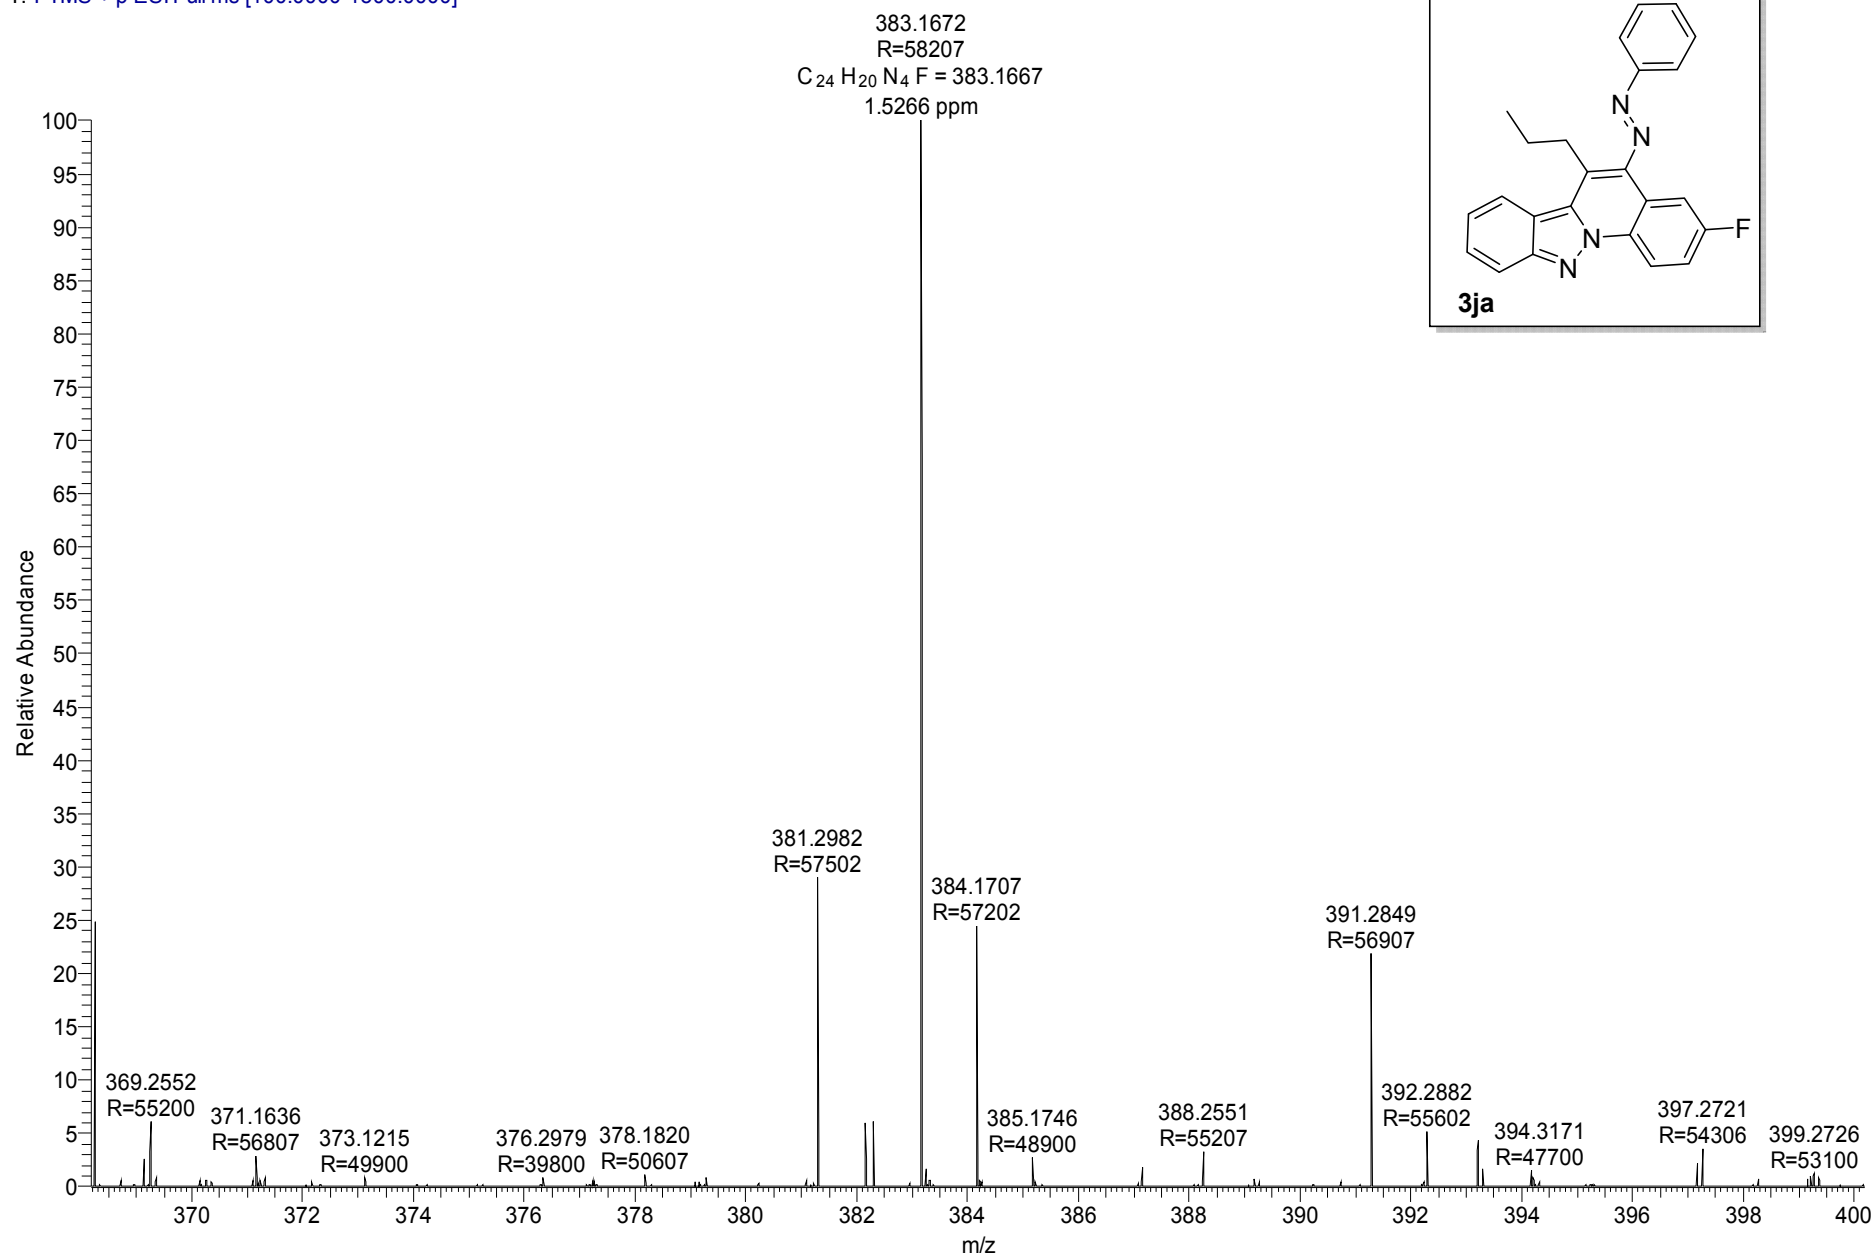

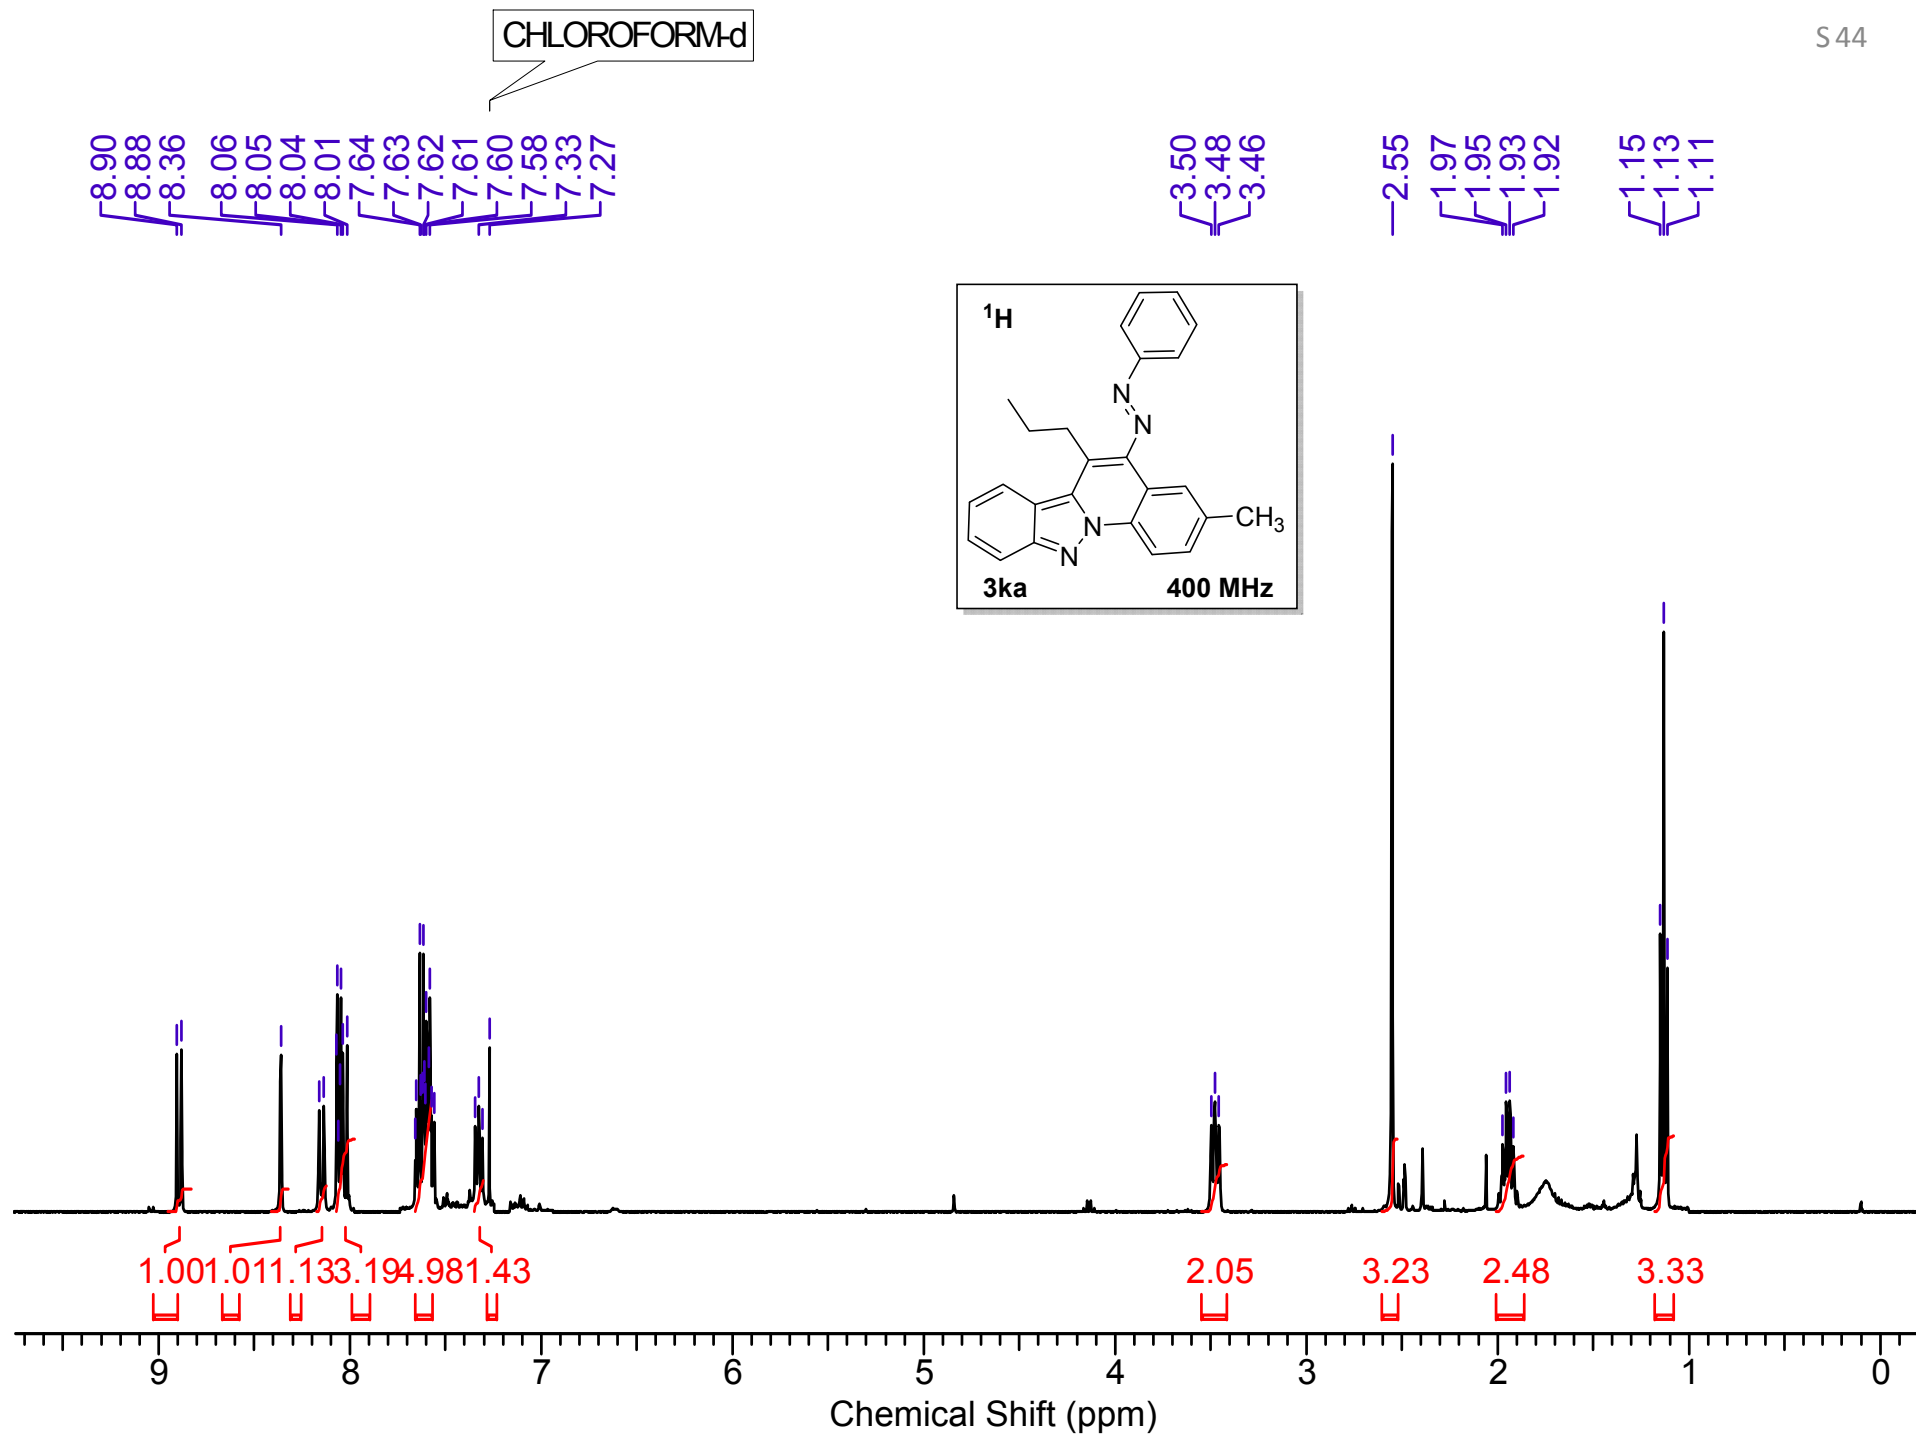

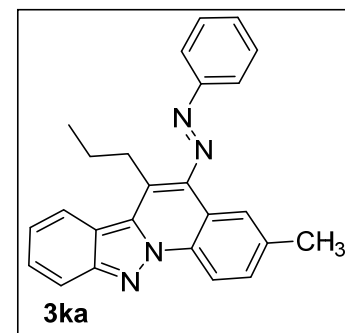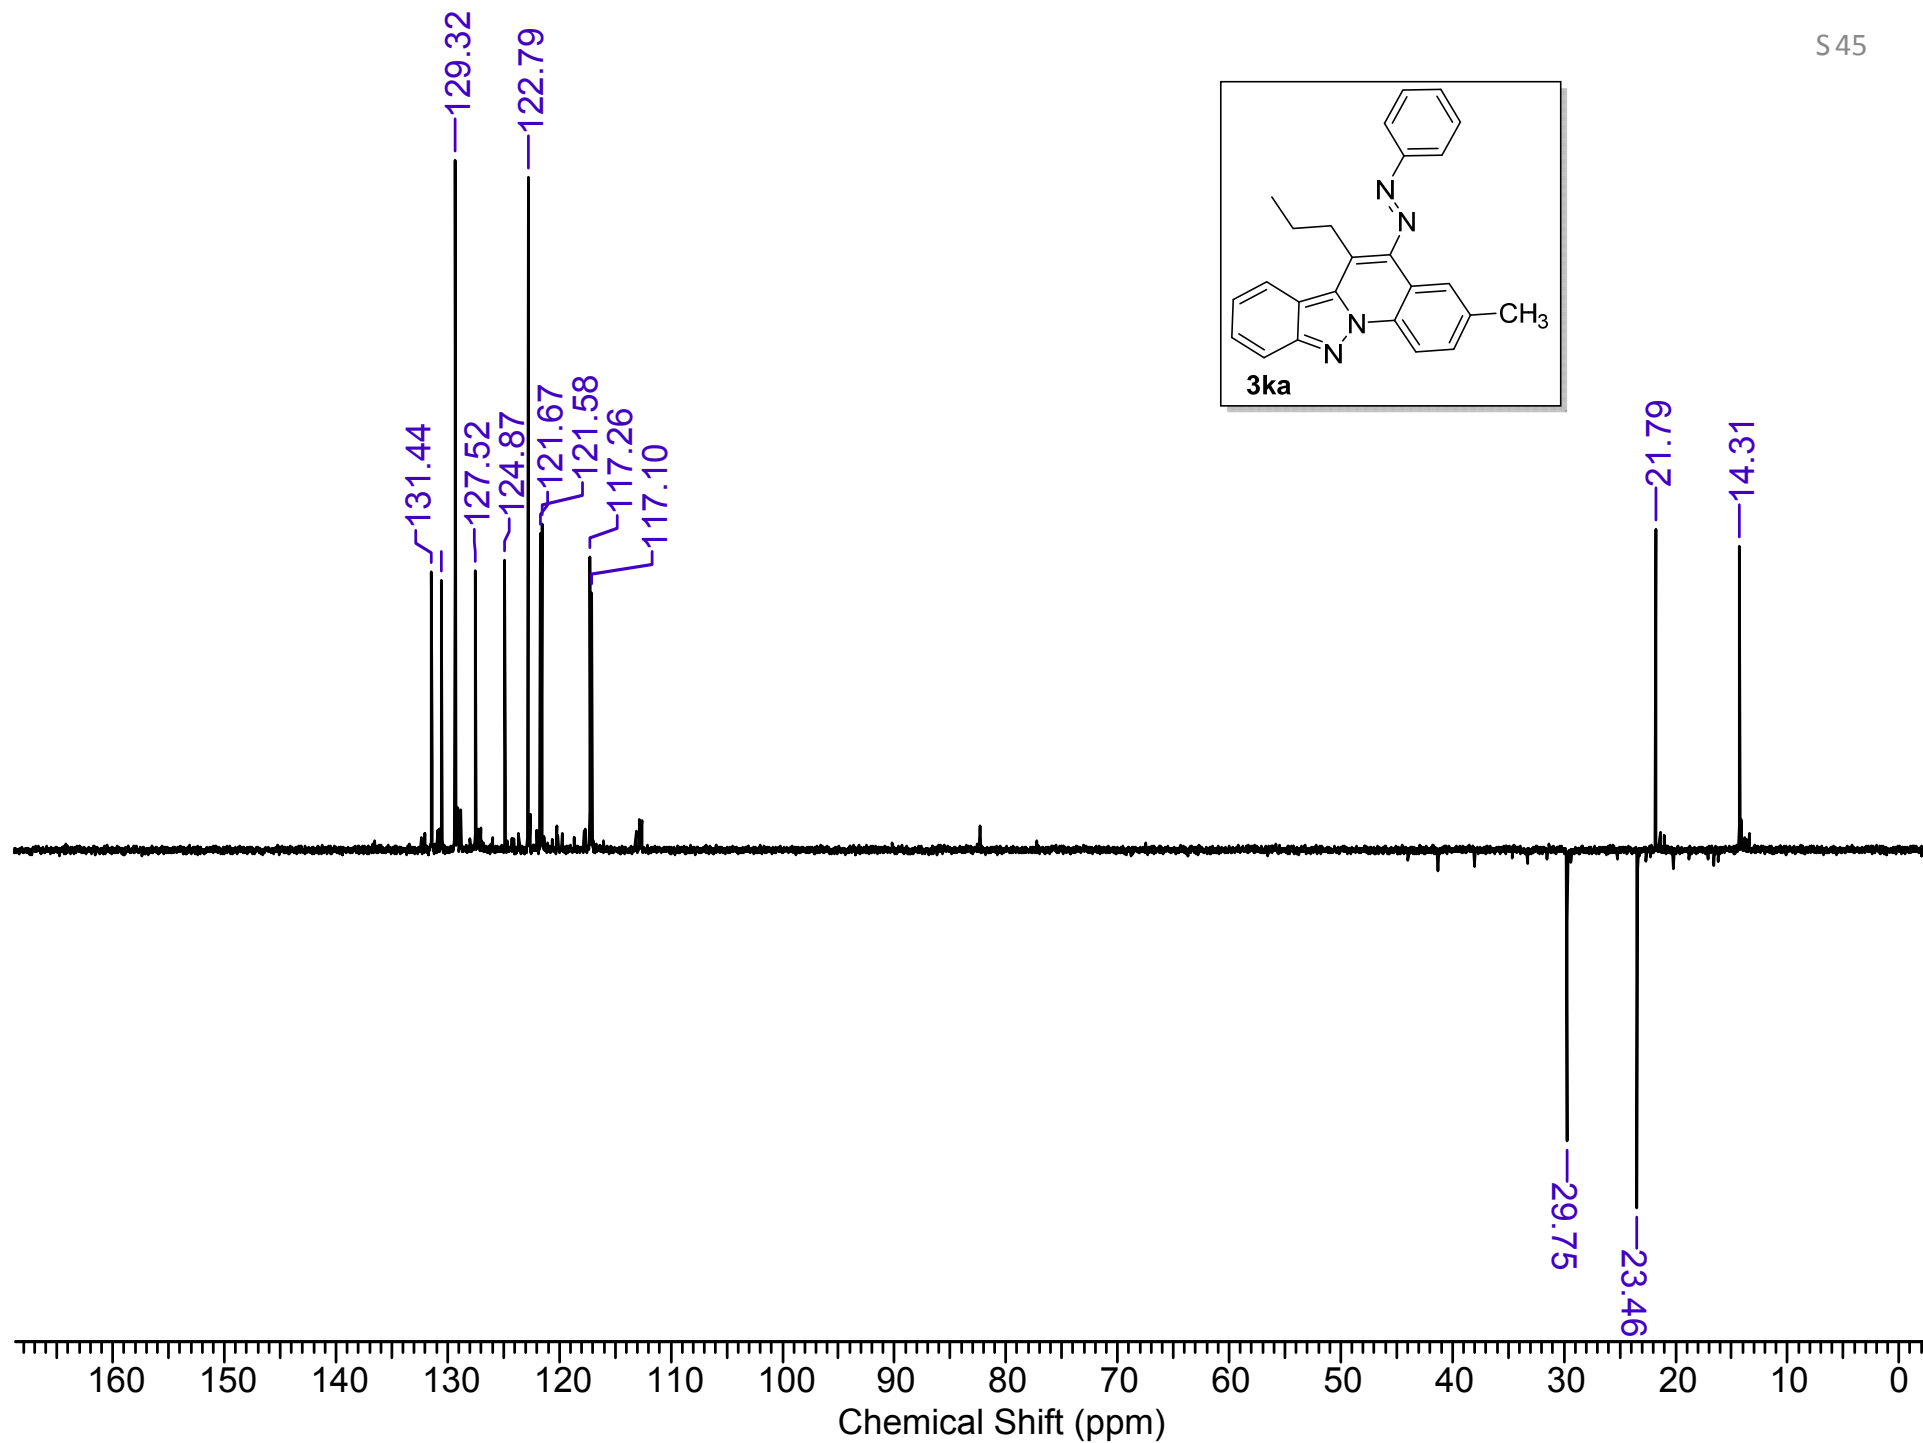

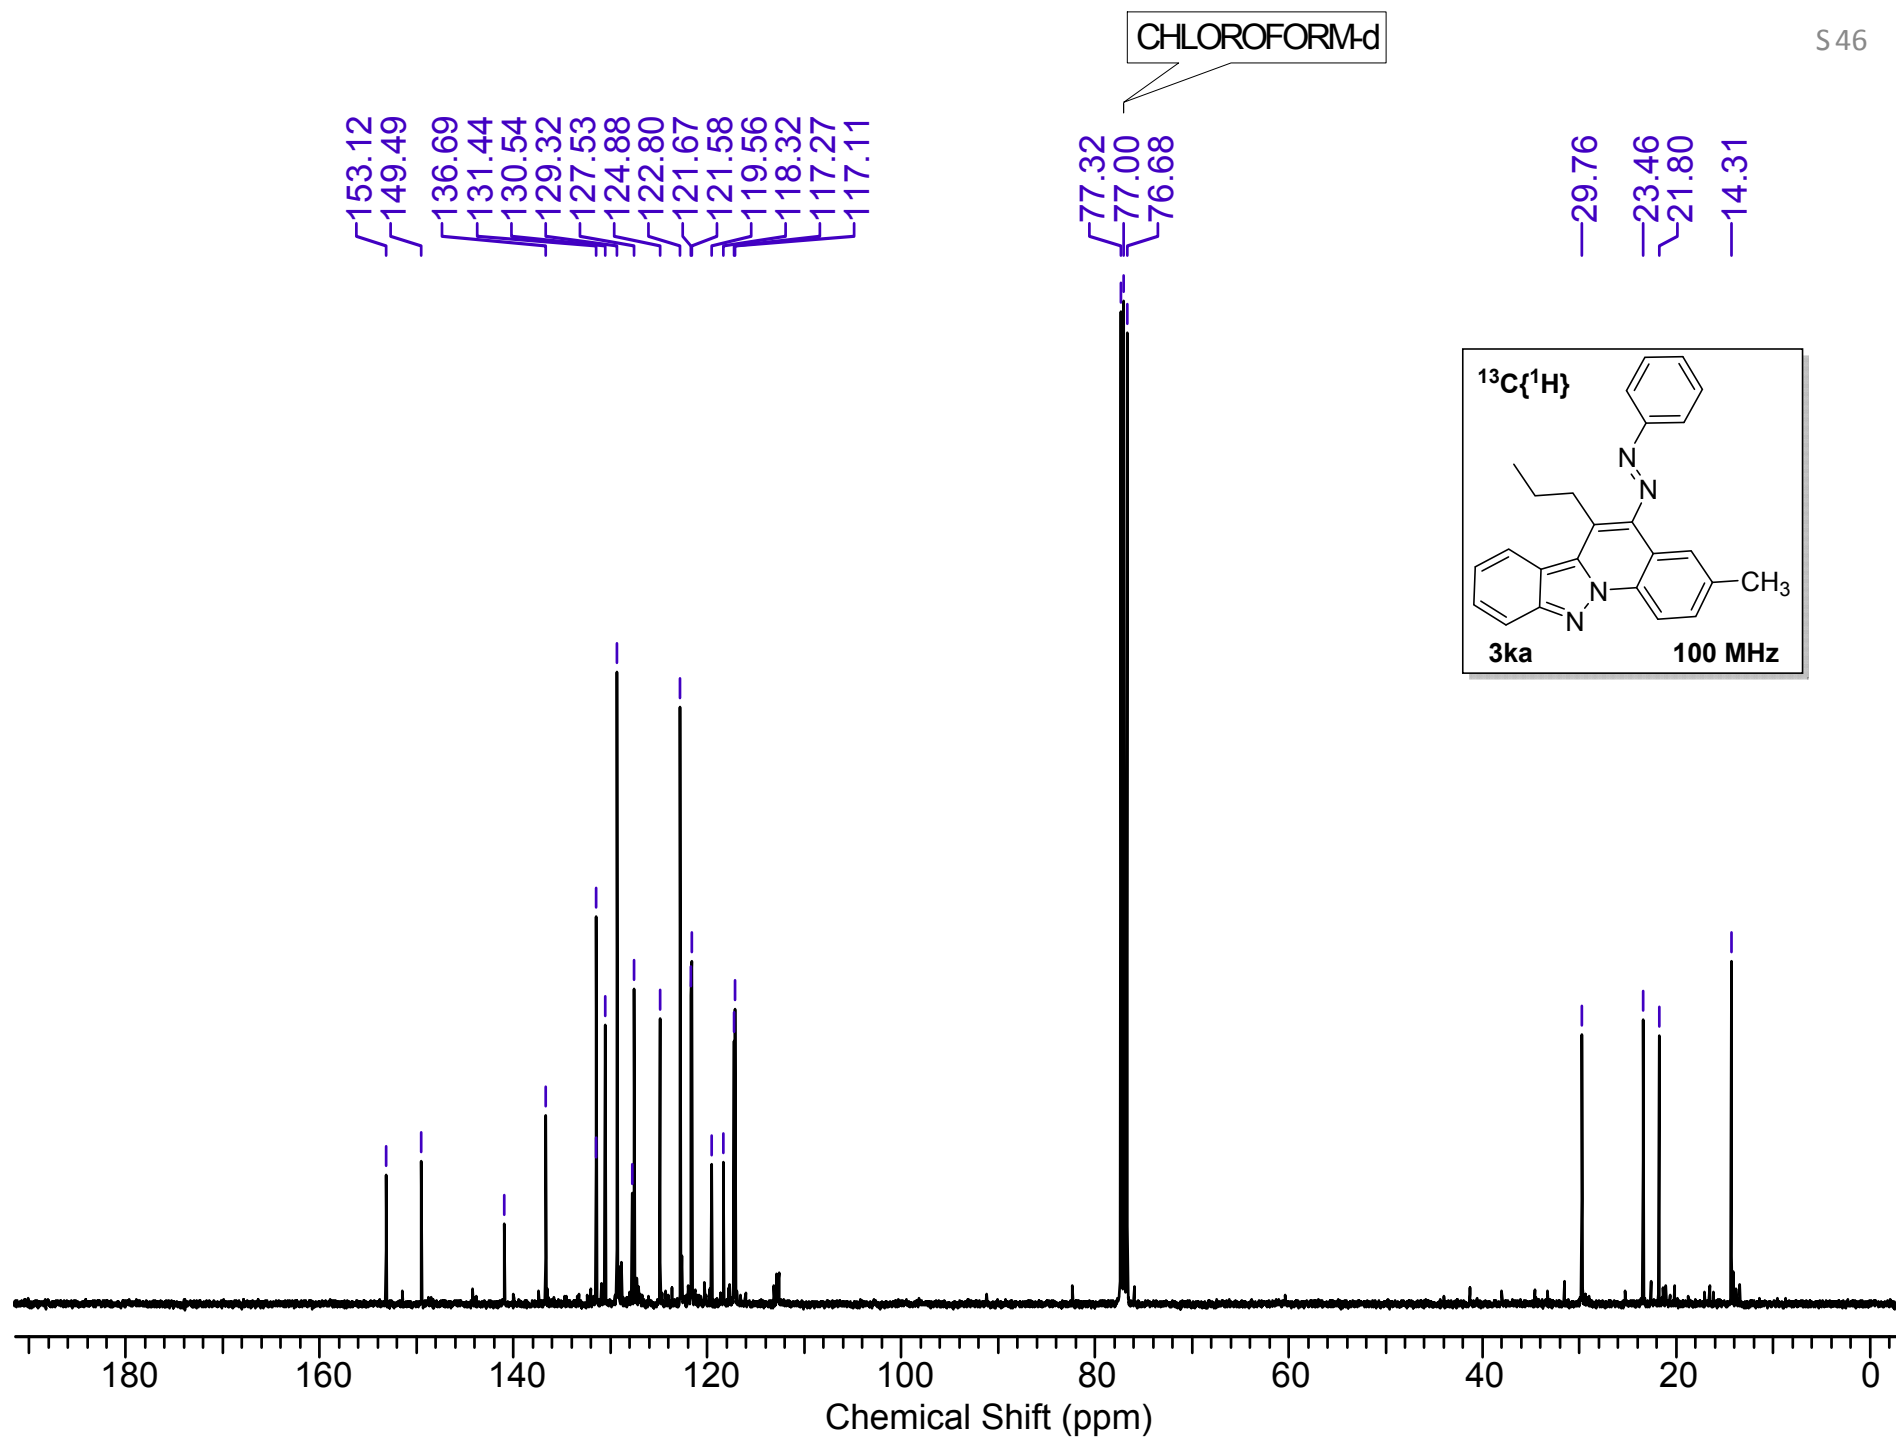

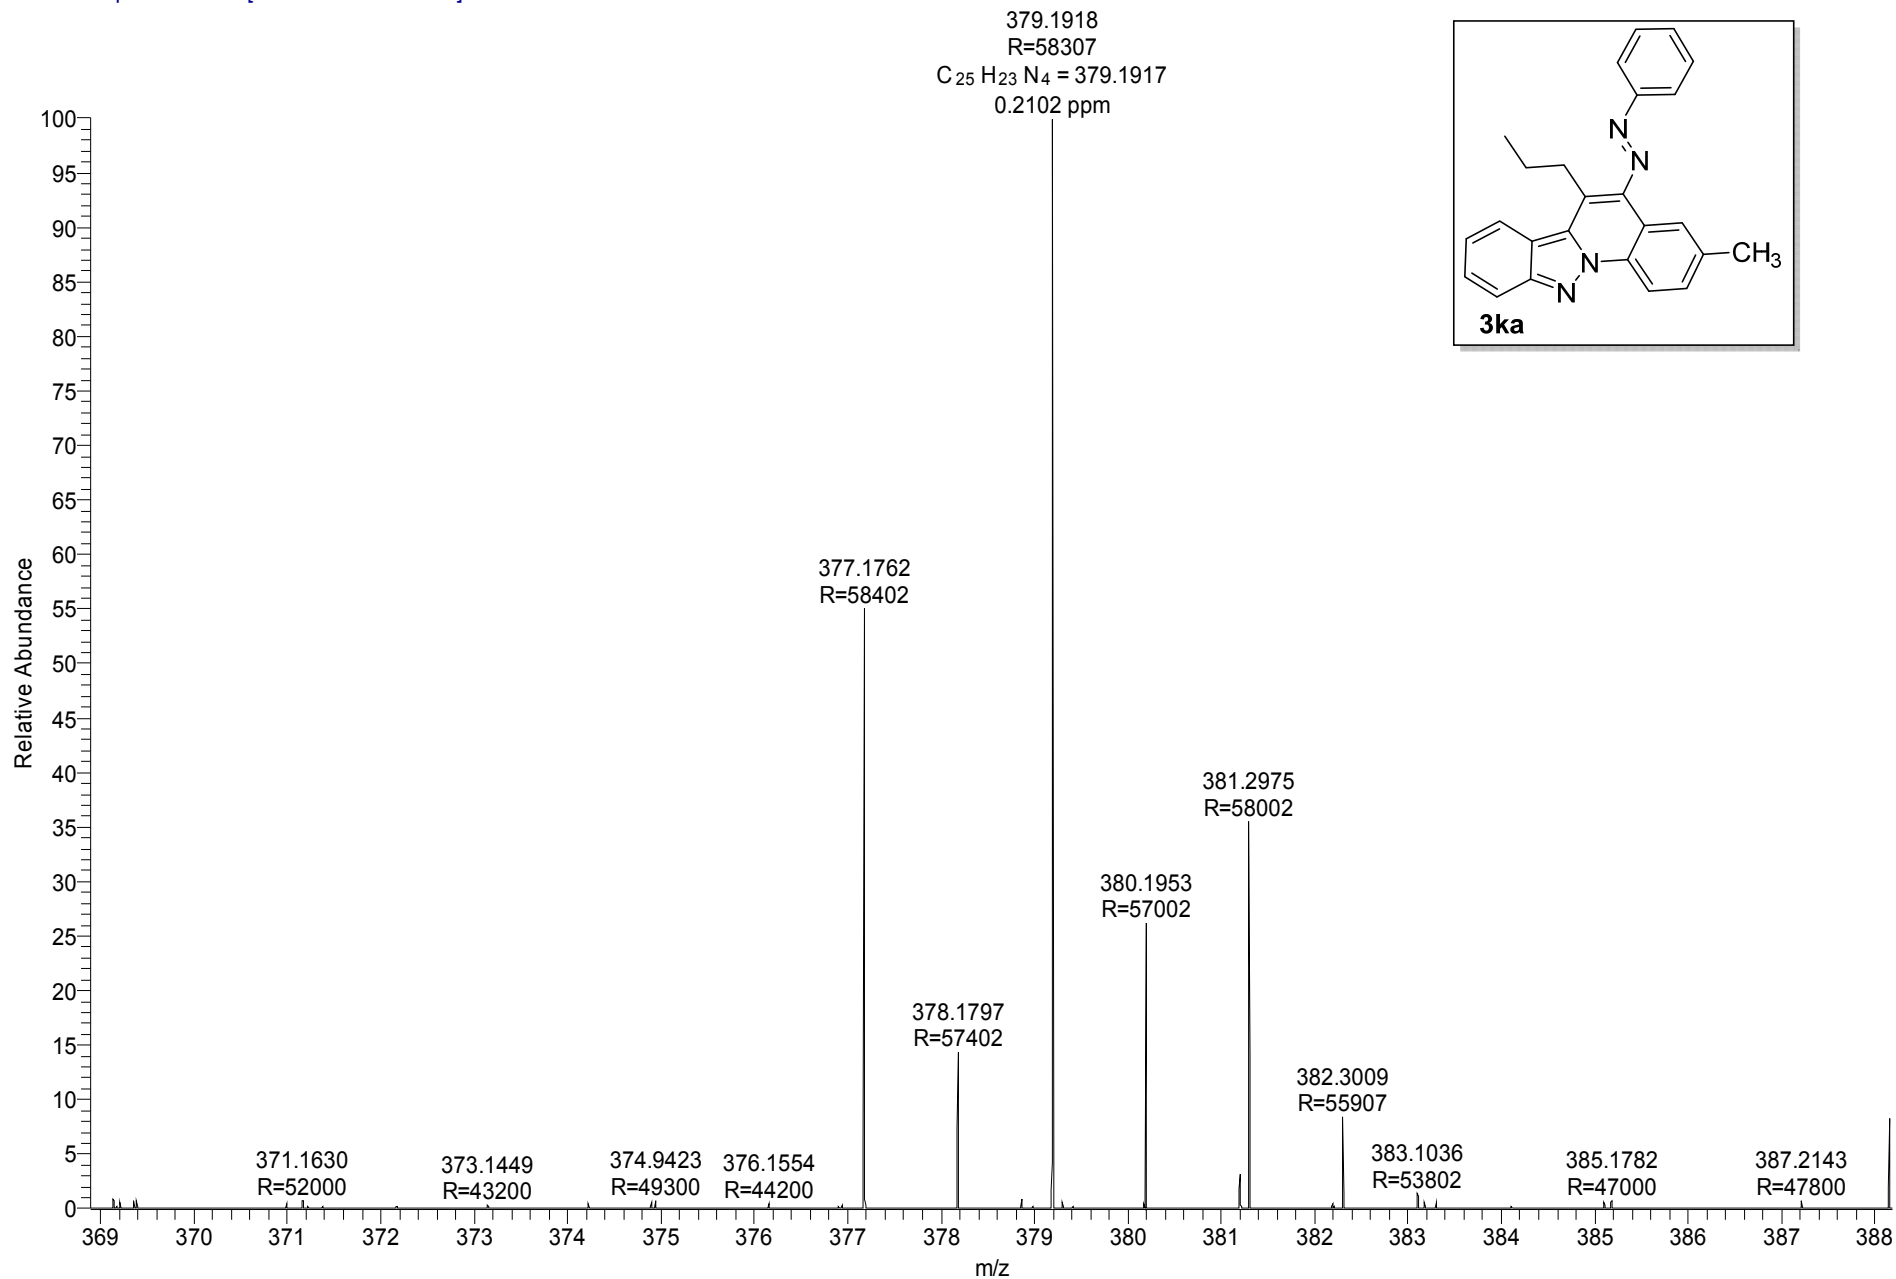

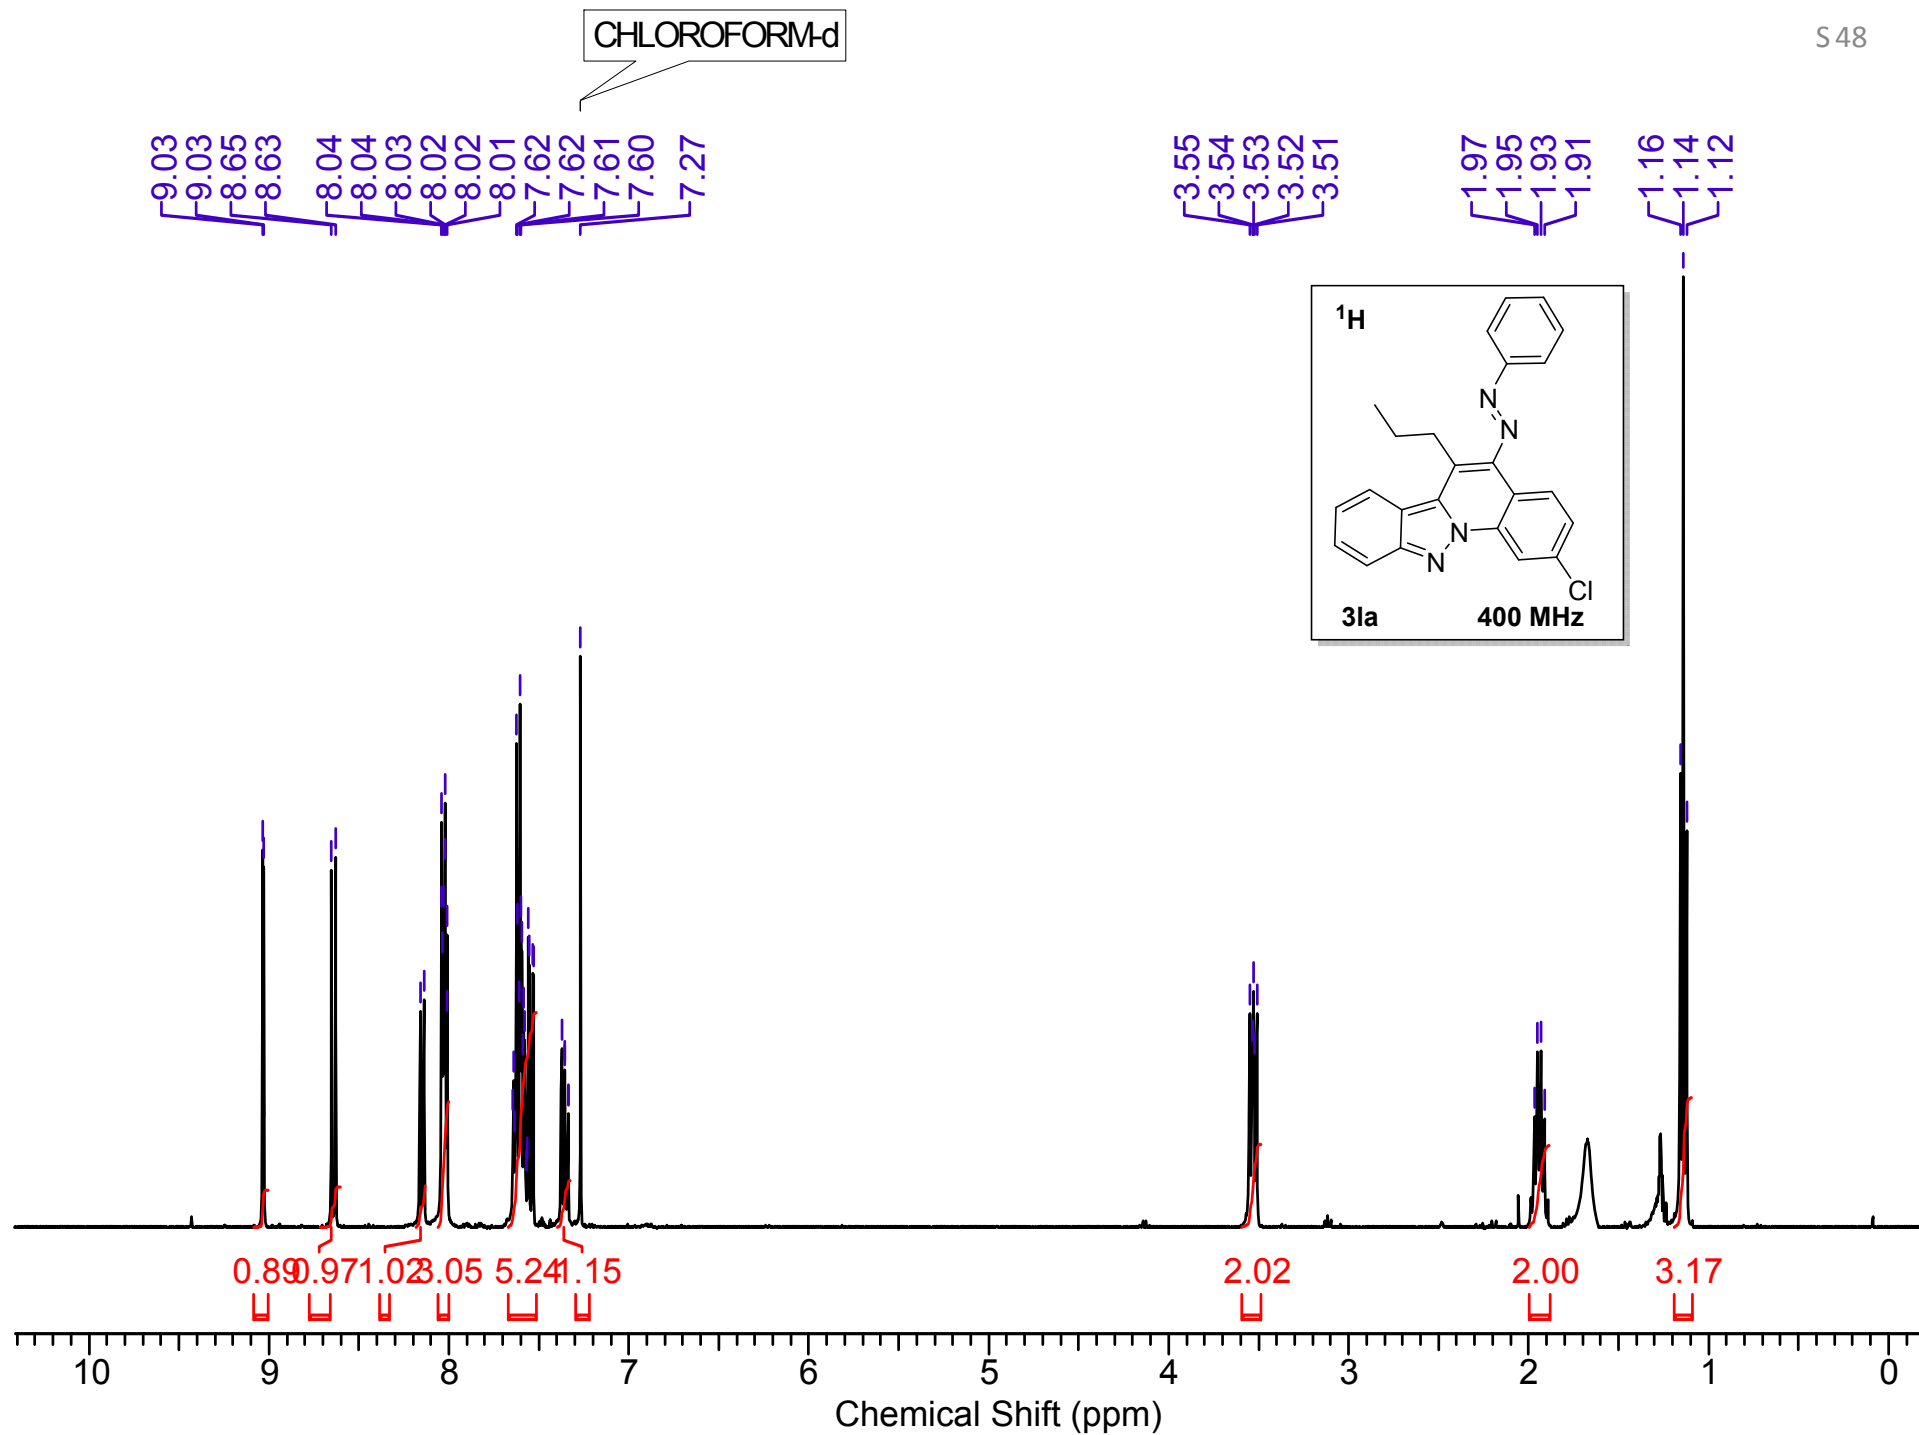



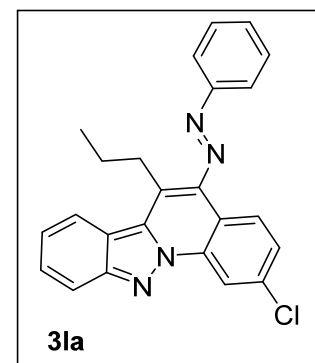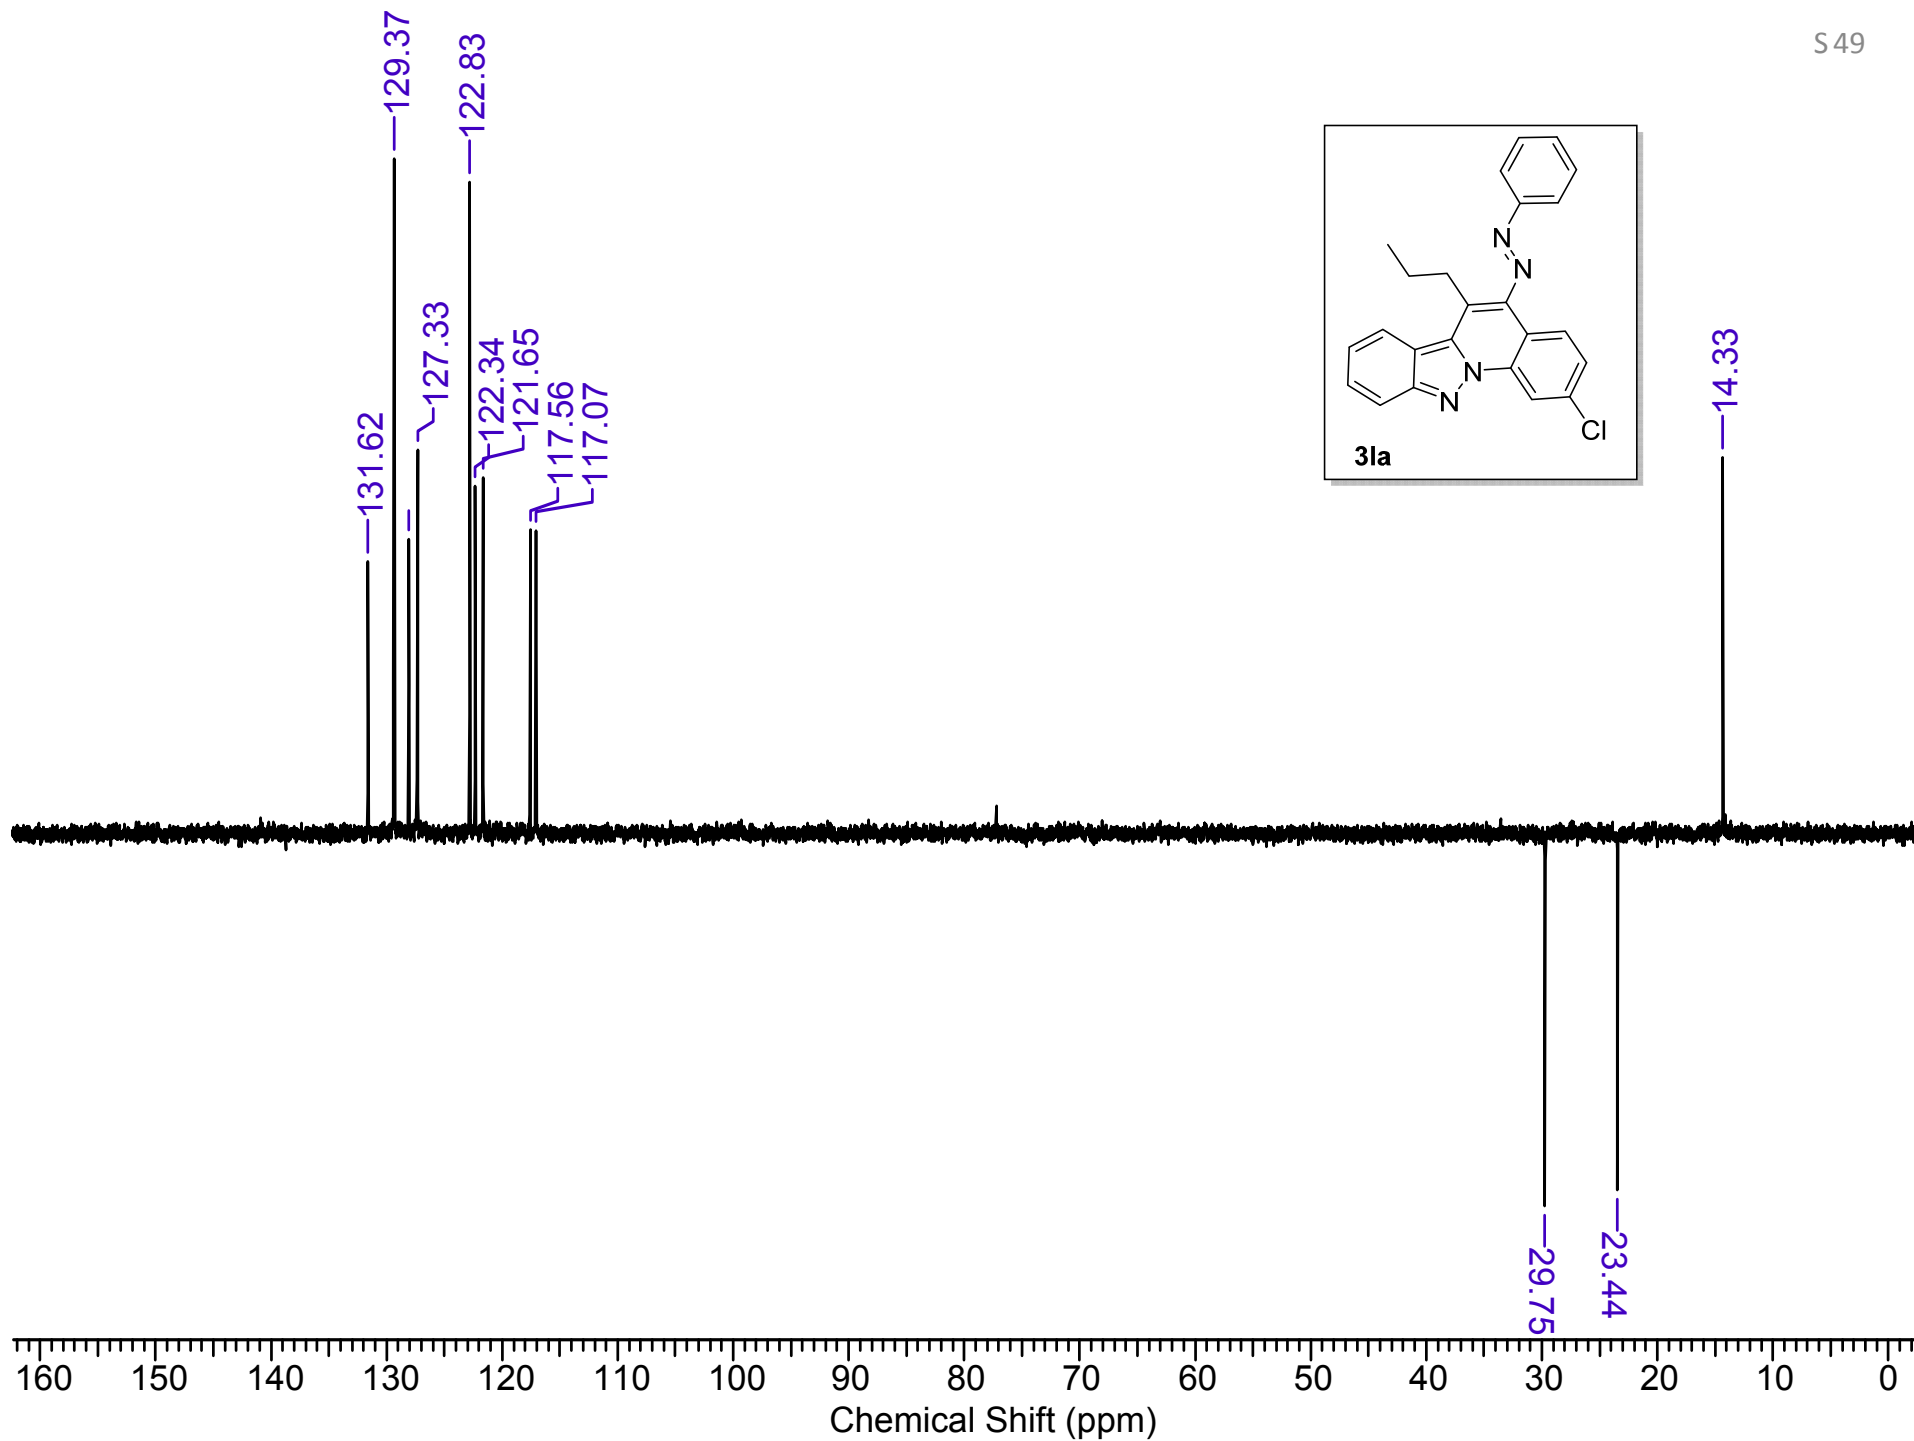

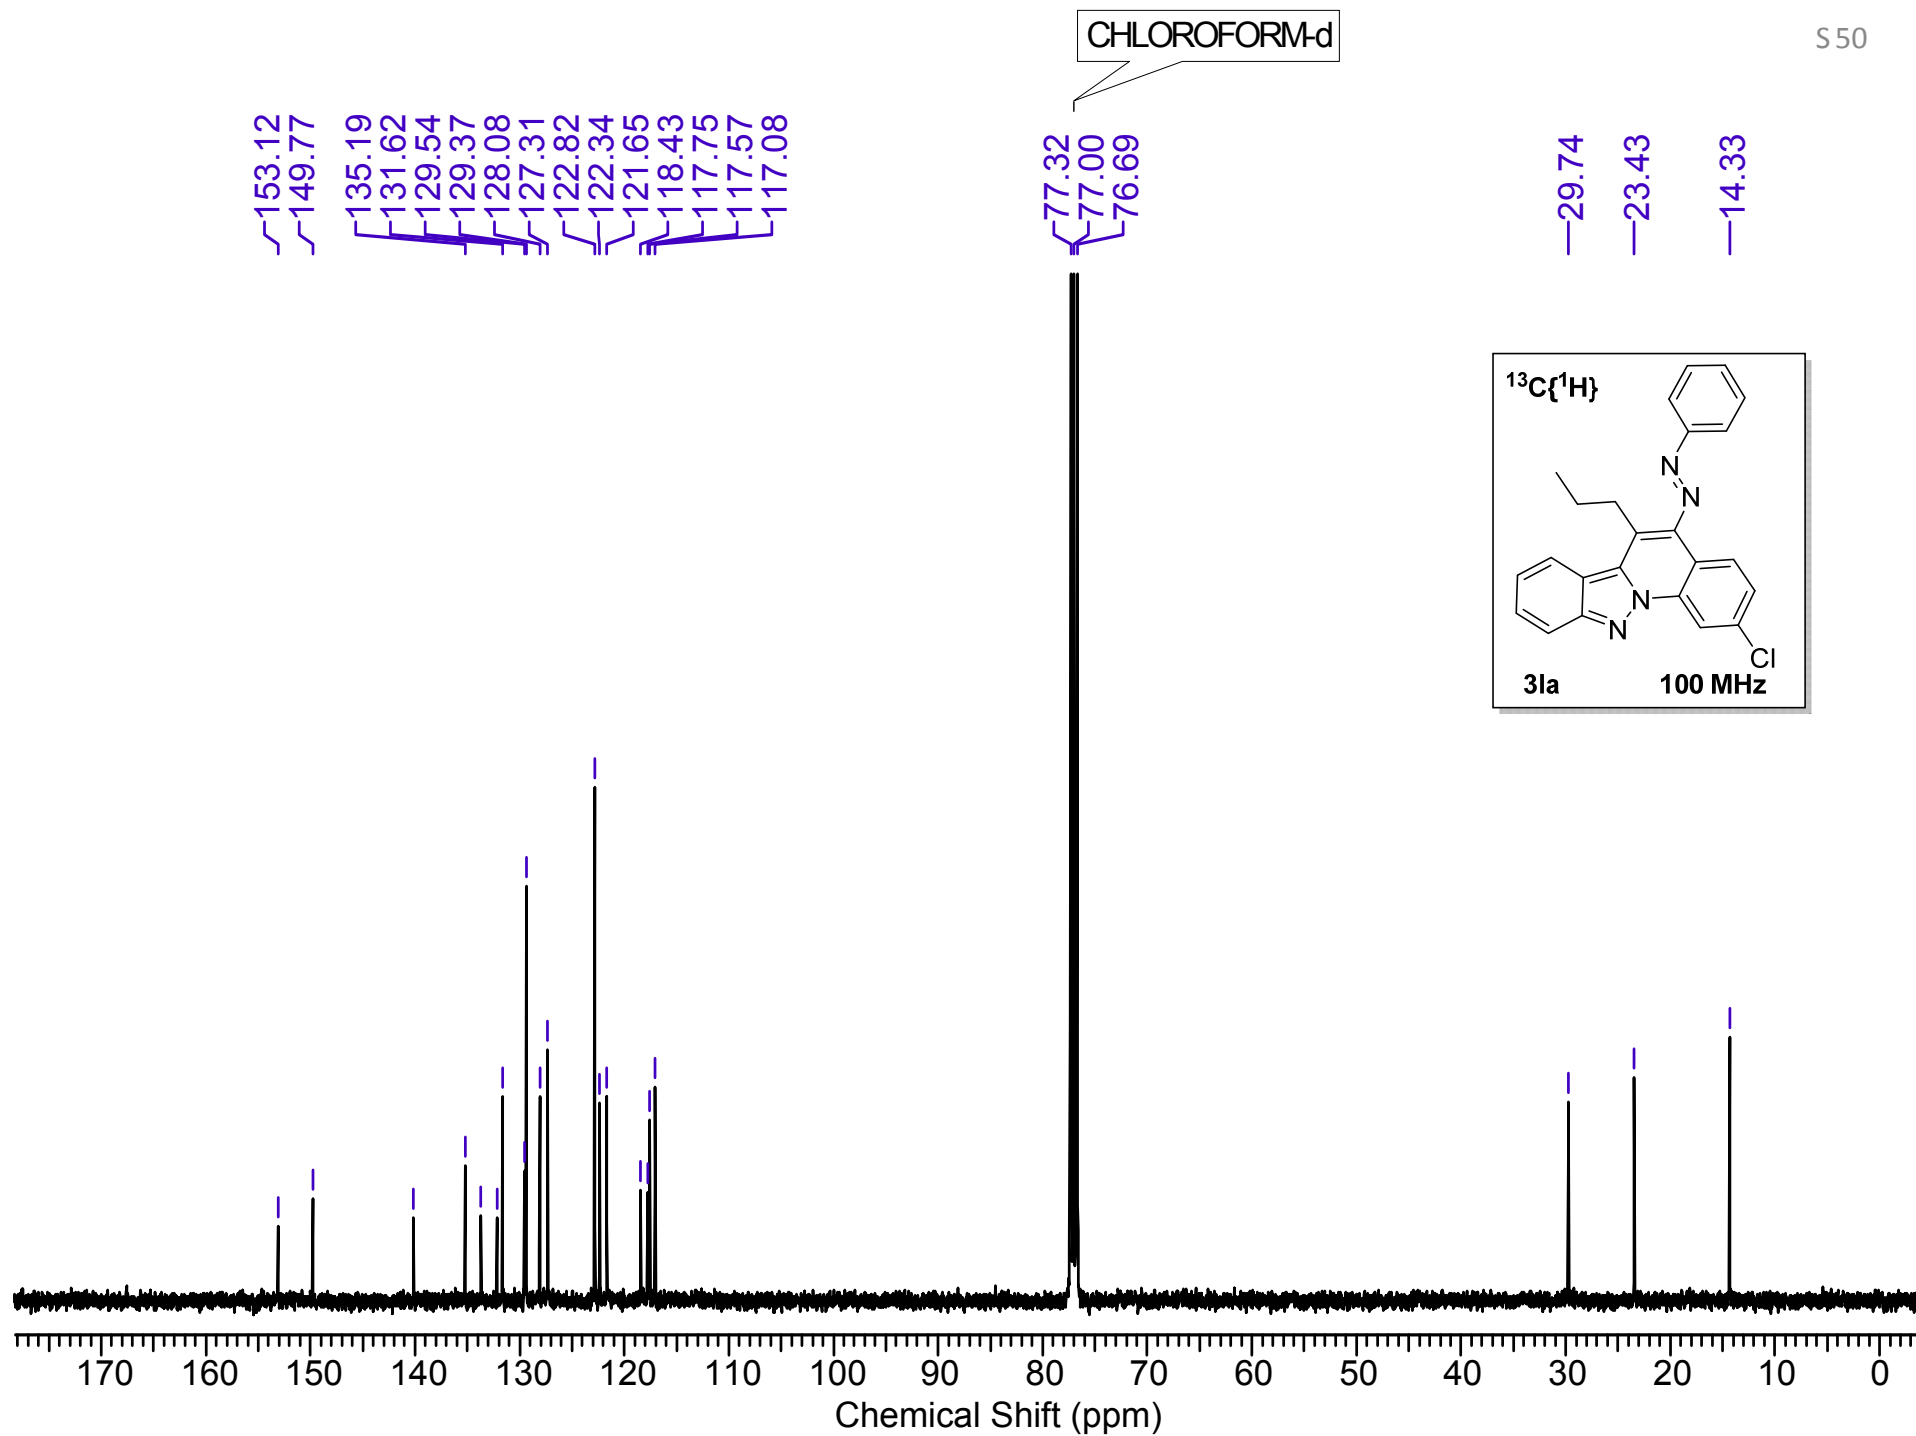

PD-705\_201231151245 #485 RT: 4.12 AV: 1 NL: 3.85E4  
T: FTMS + p ESI Full ms [100.0000-1500.0000]

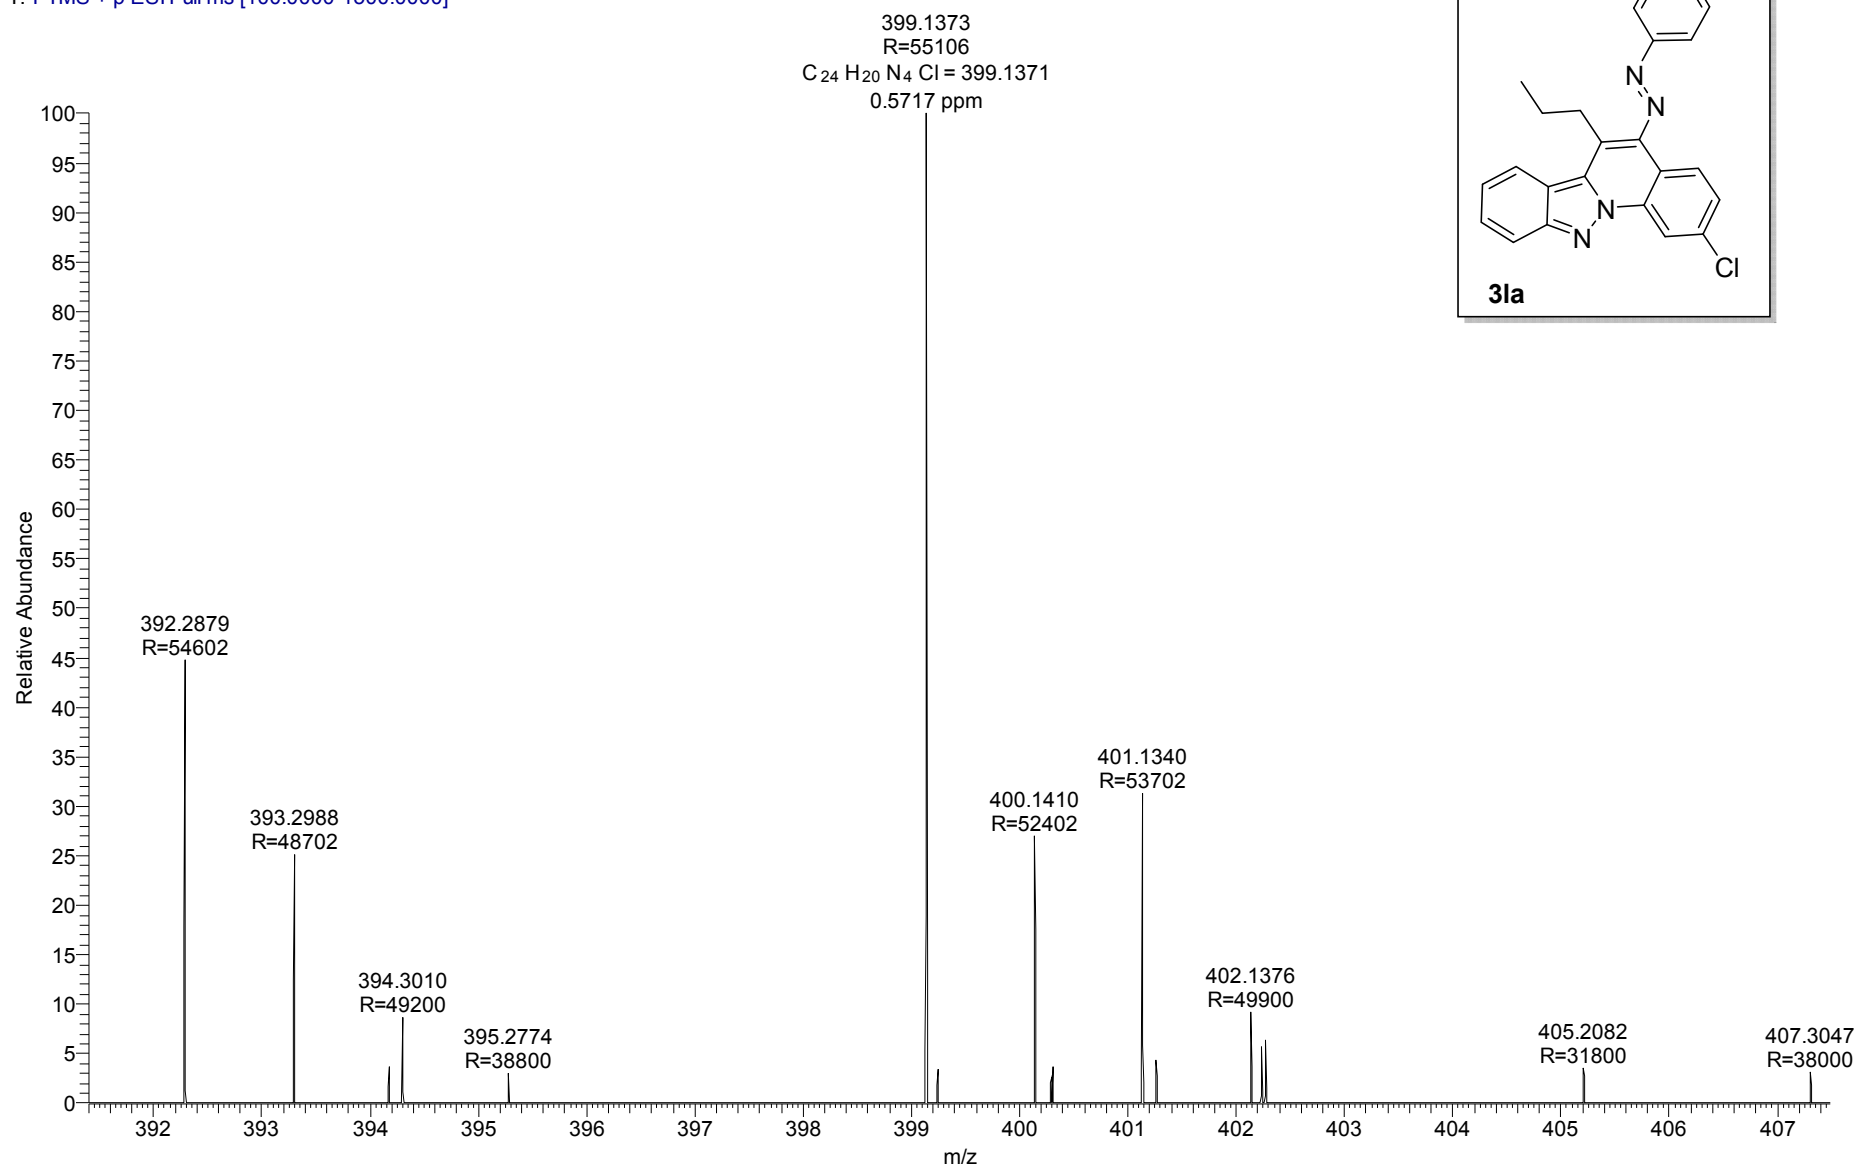

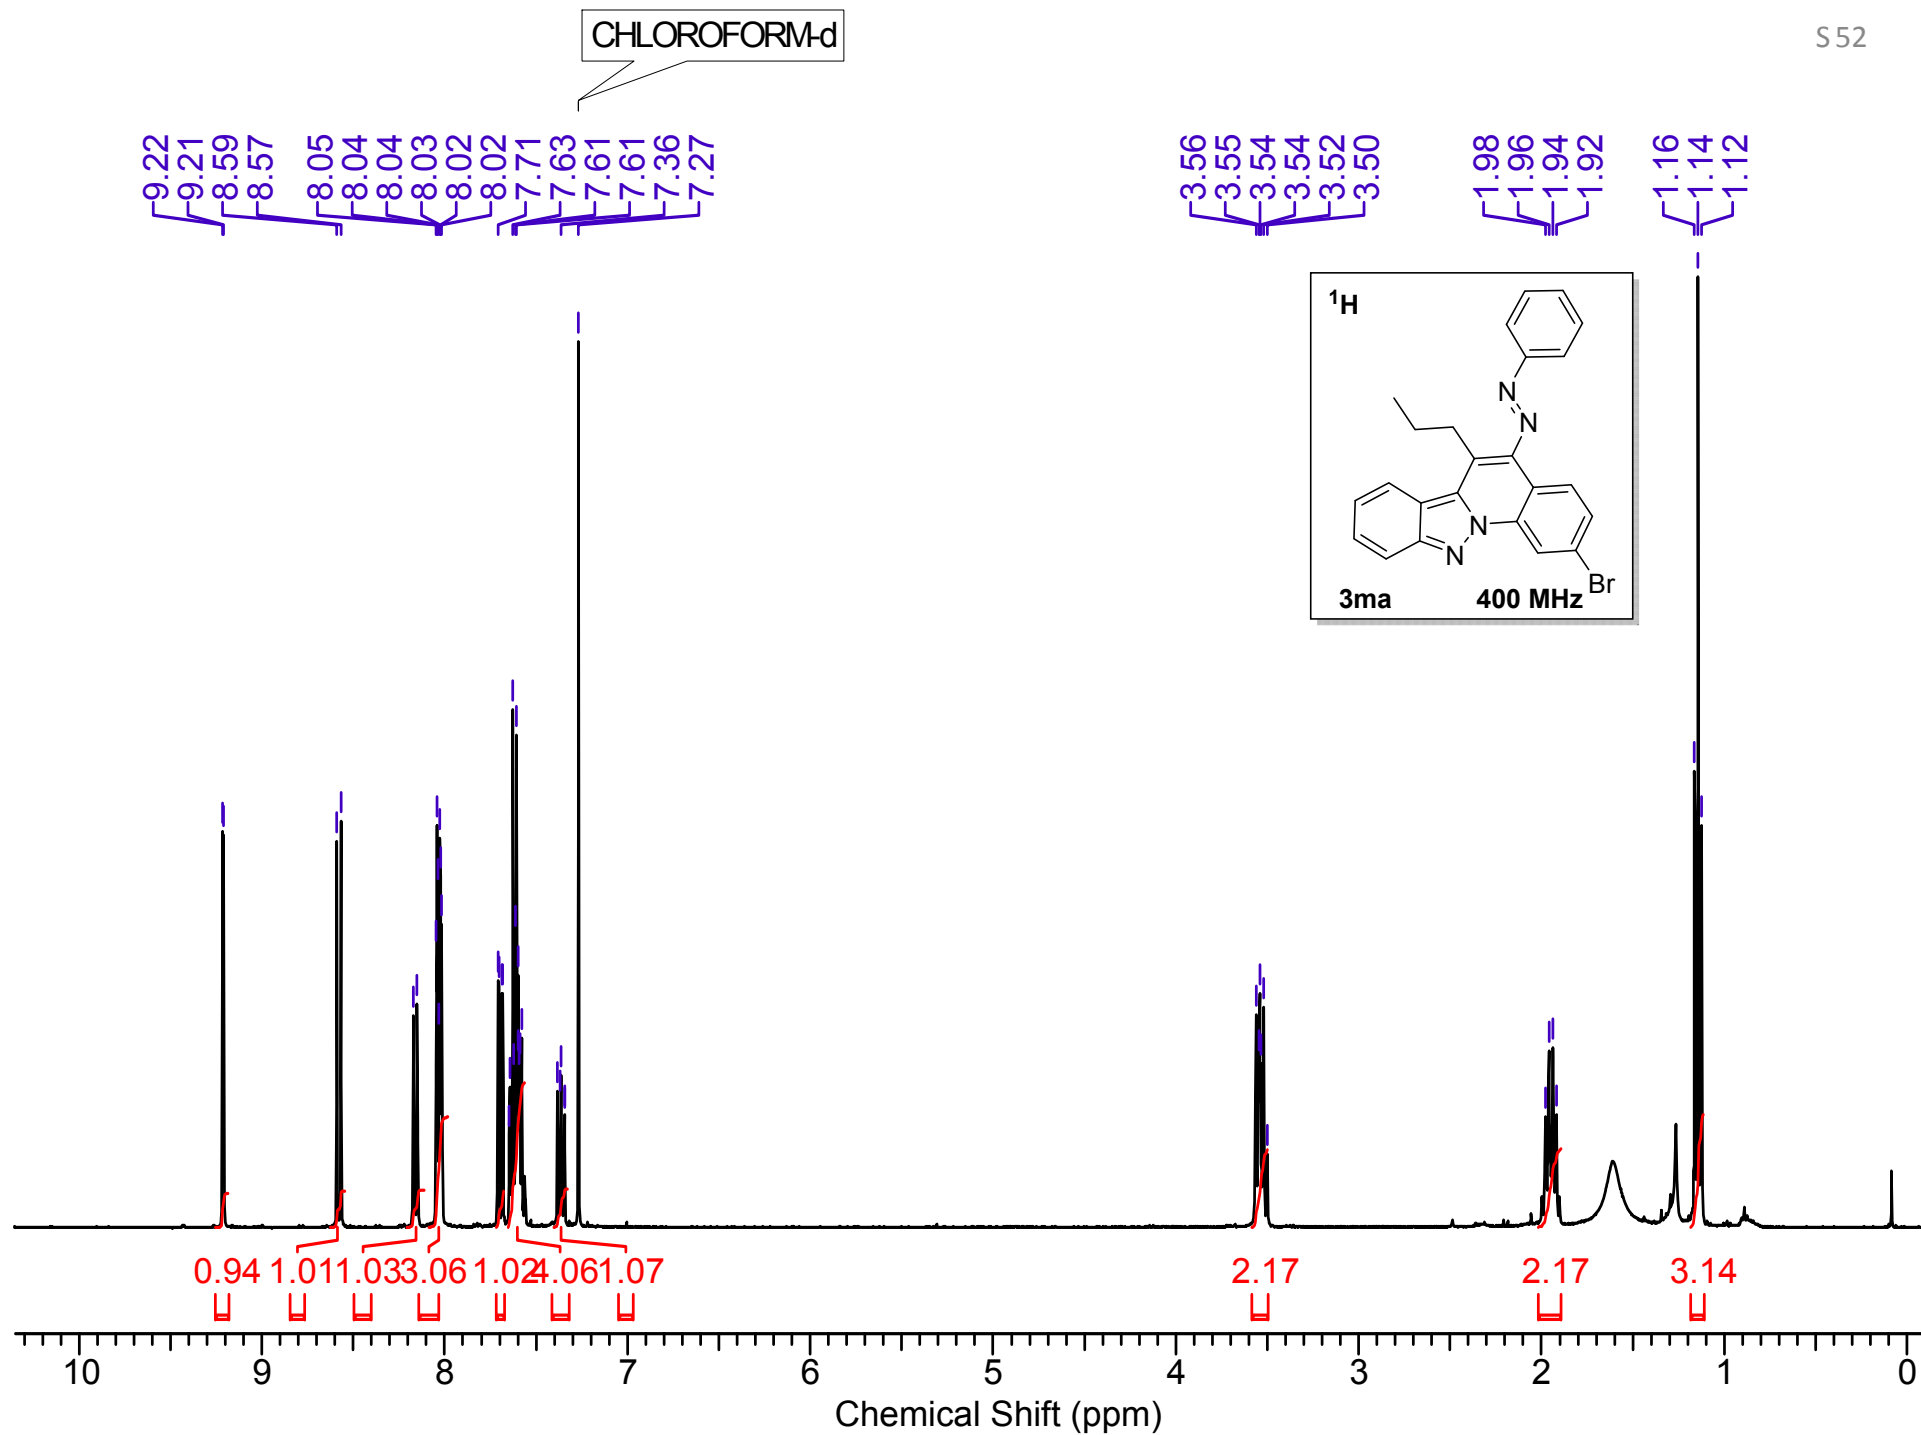

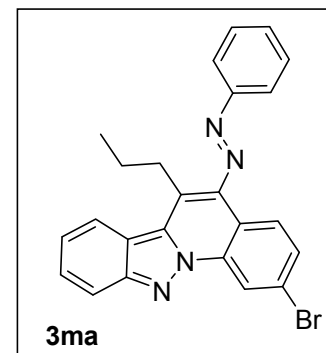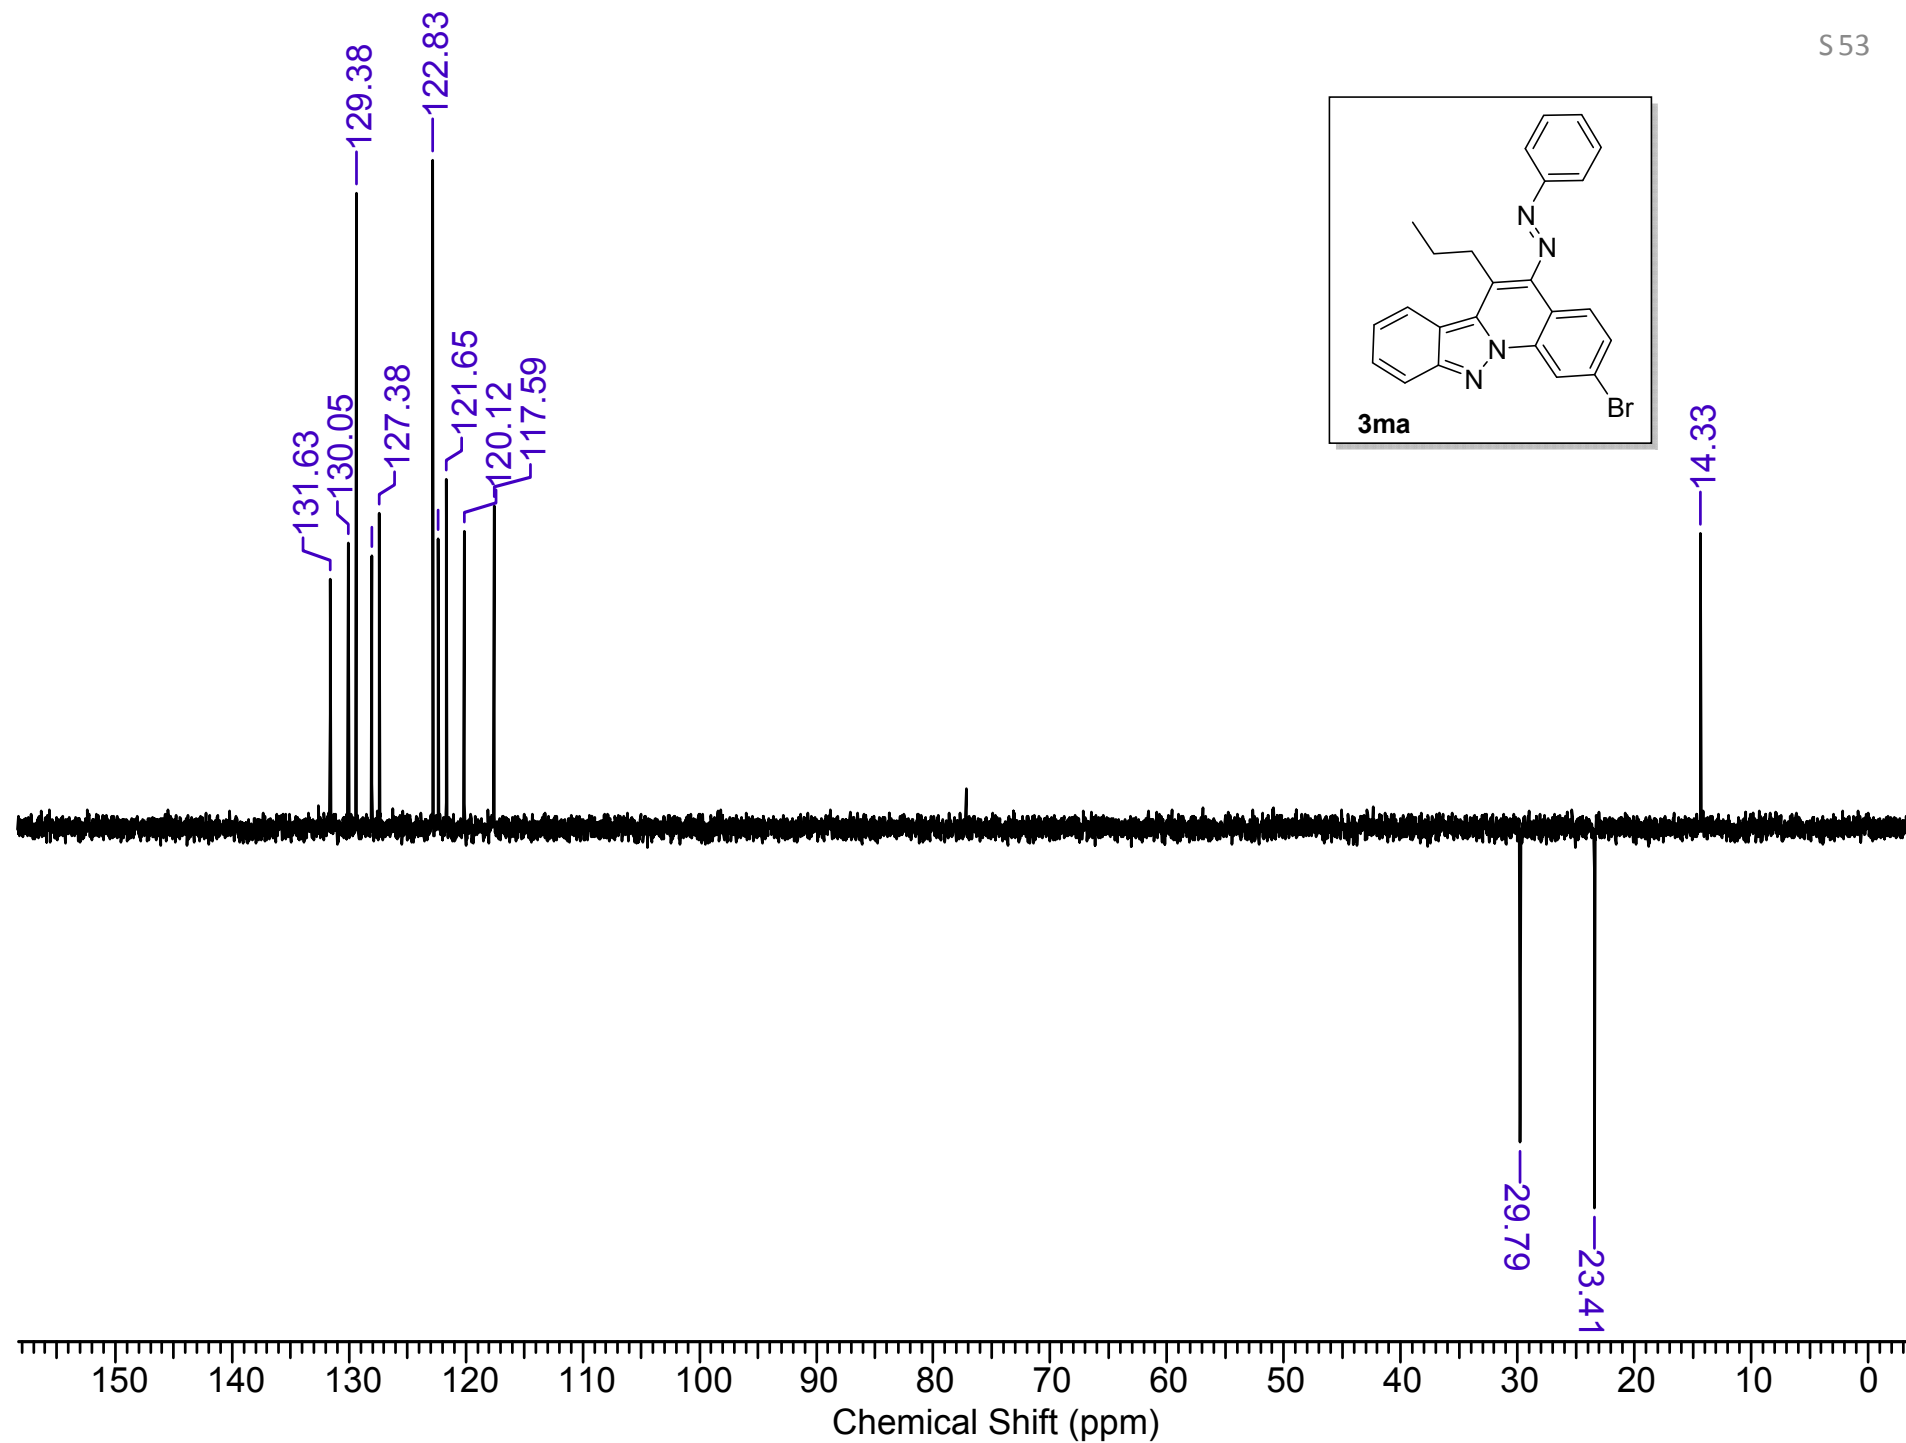

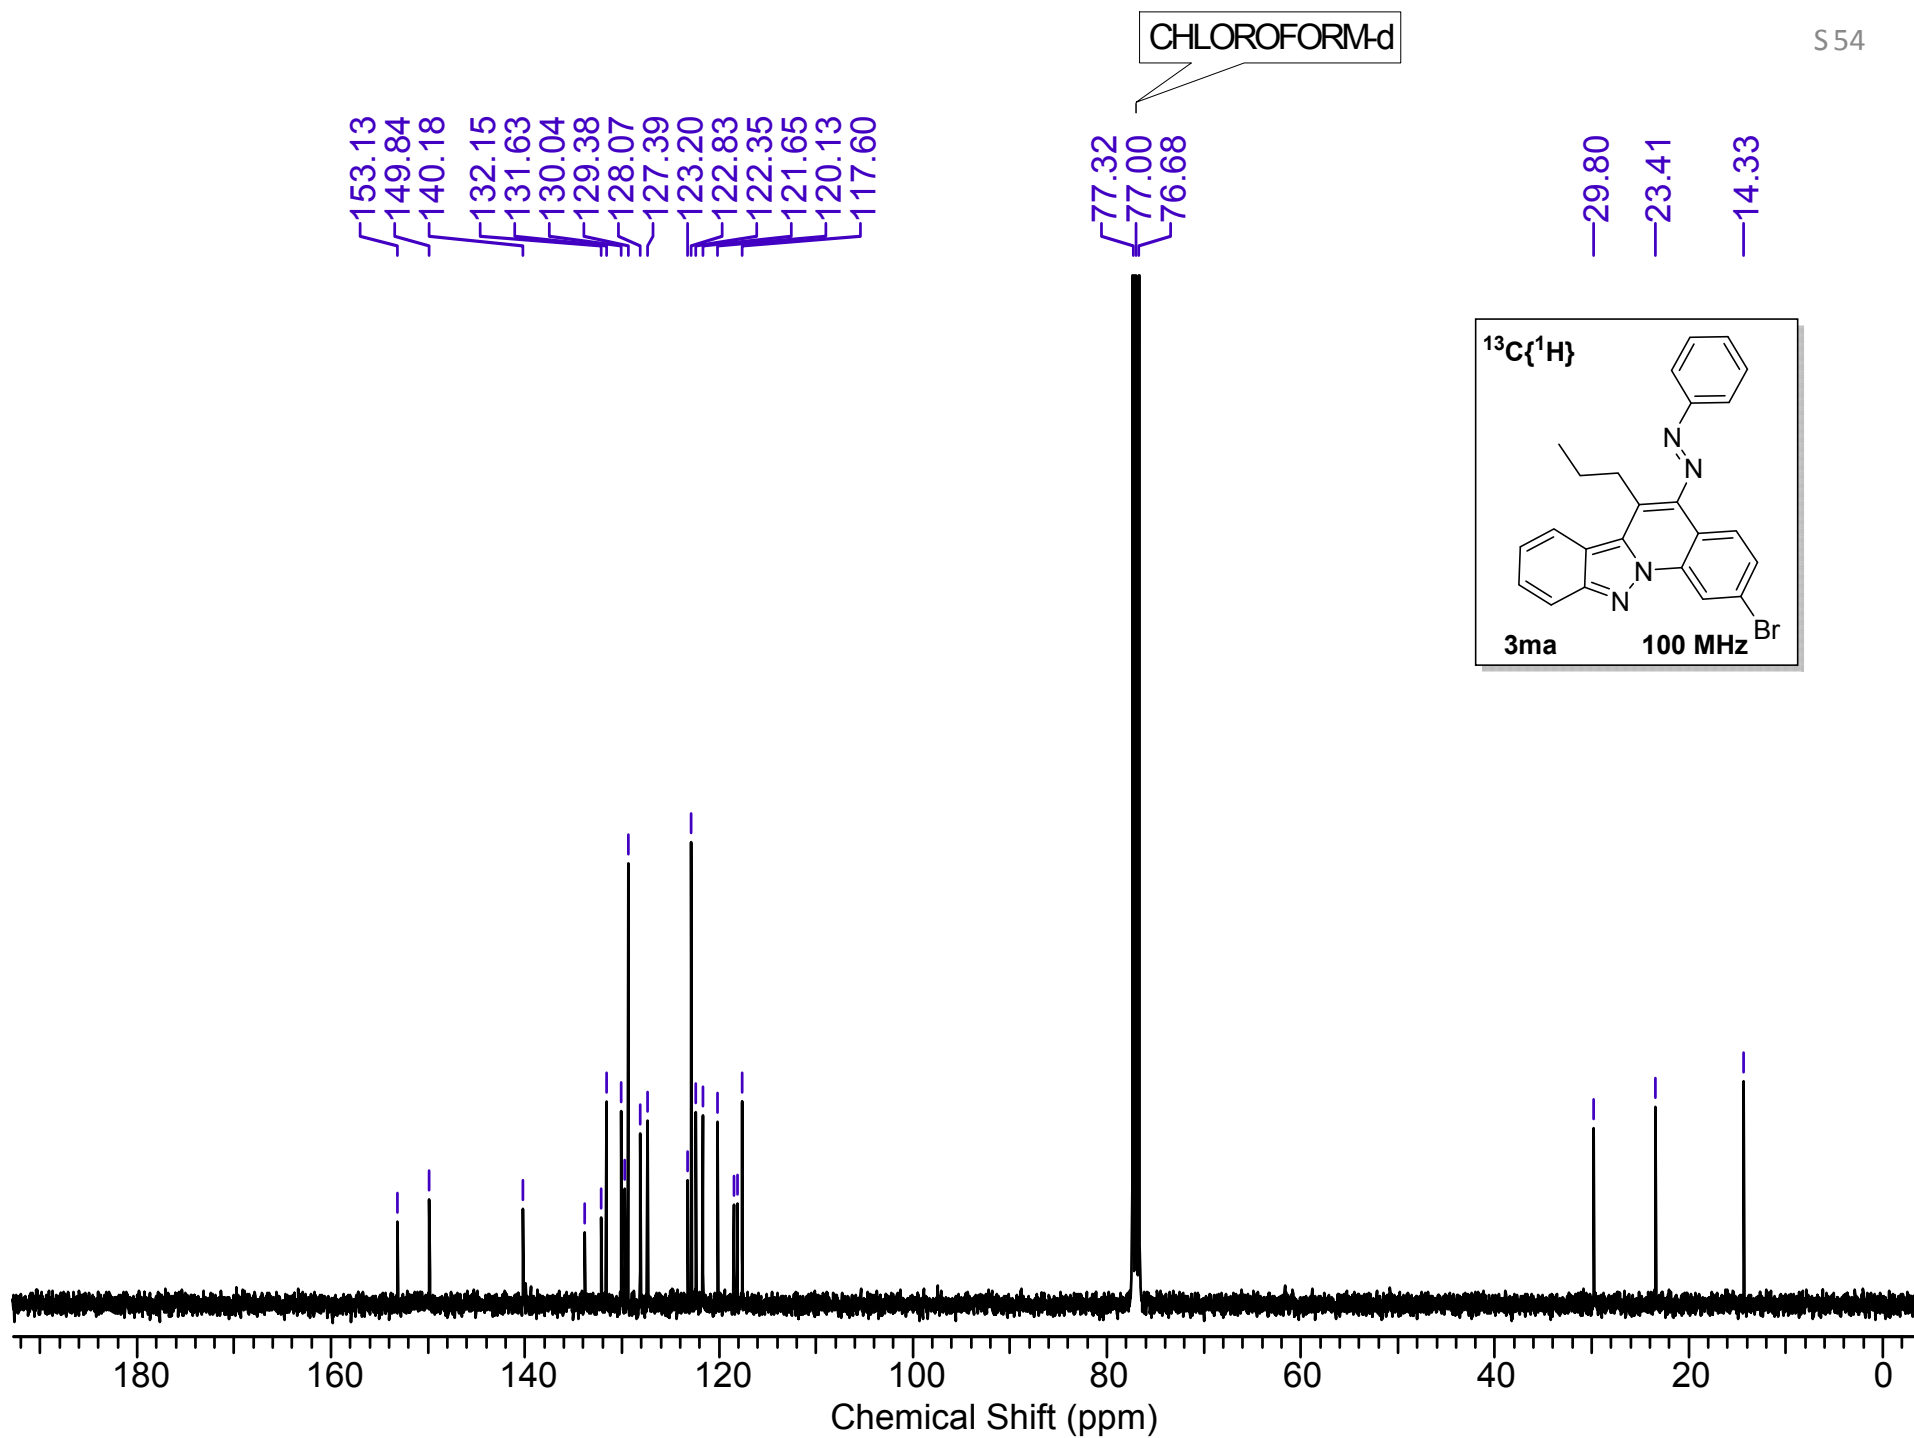

PSD-704 #542 RT: 3.25 AV: 1 NL: 1.24E5  
T: FTMS + p ESI Full ms [100.0000-1500.0000]

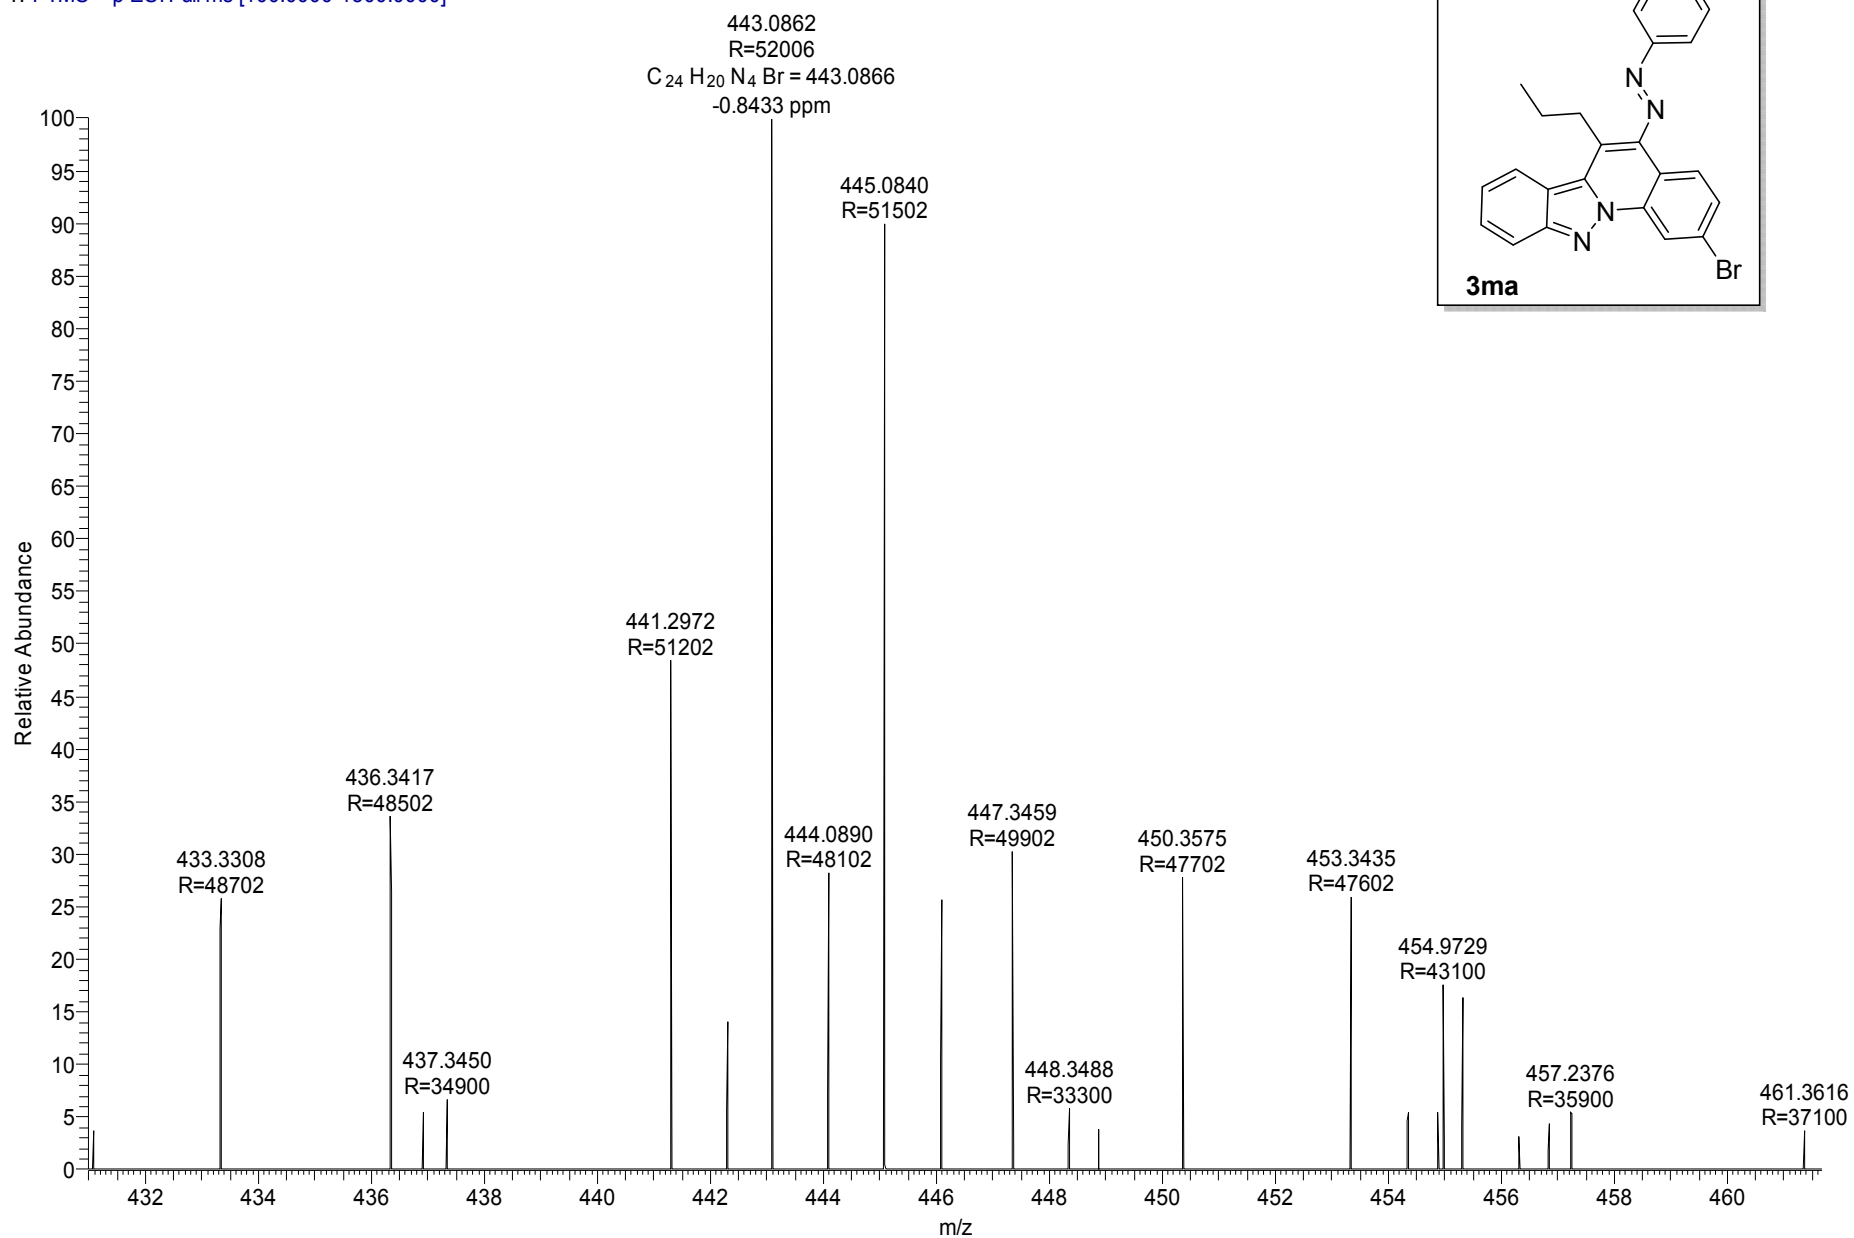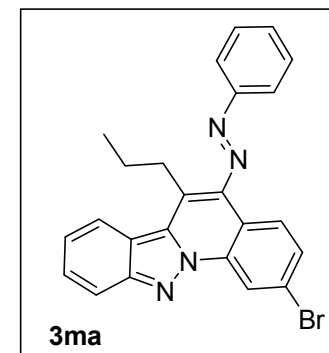

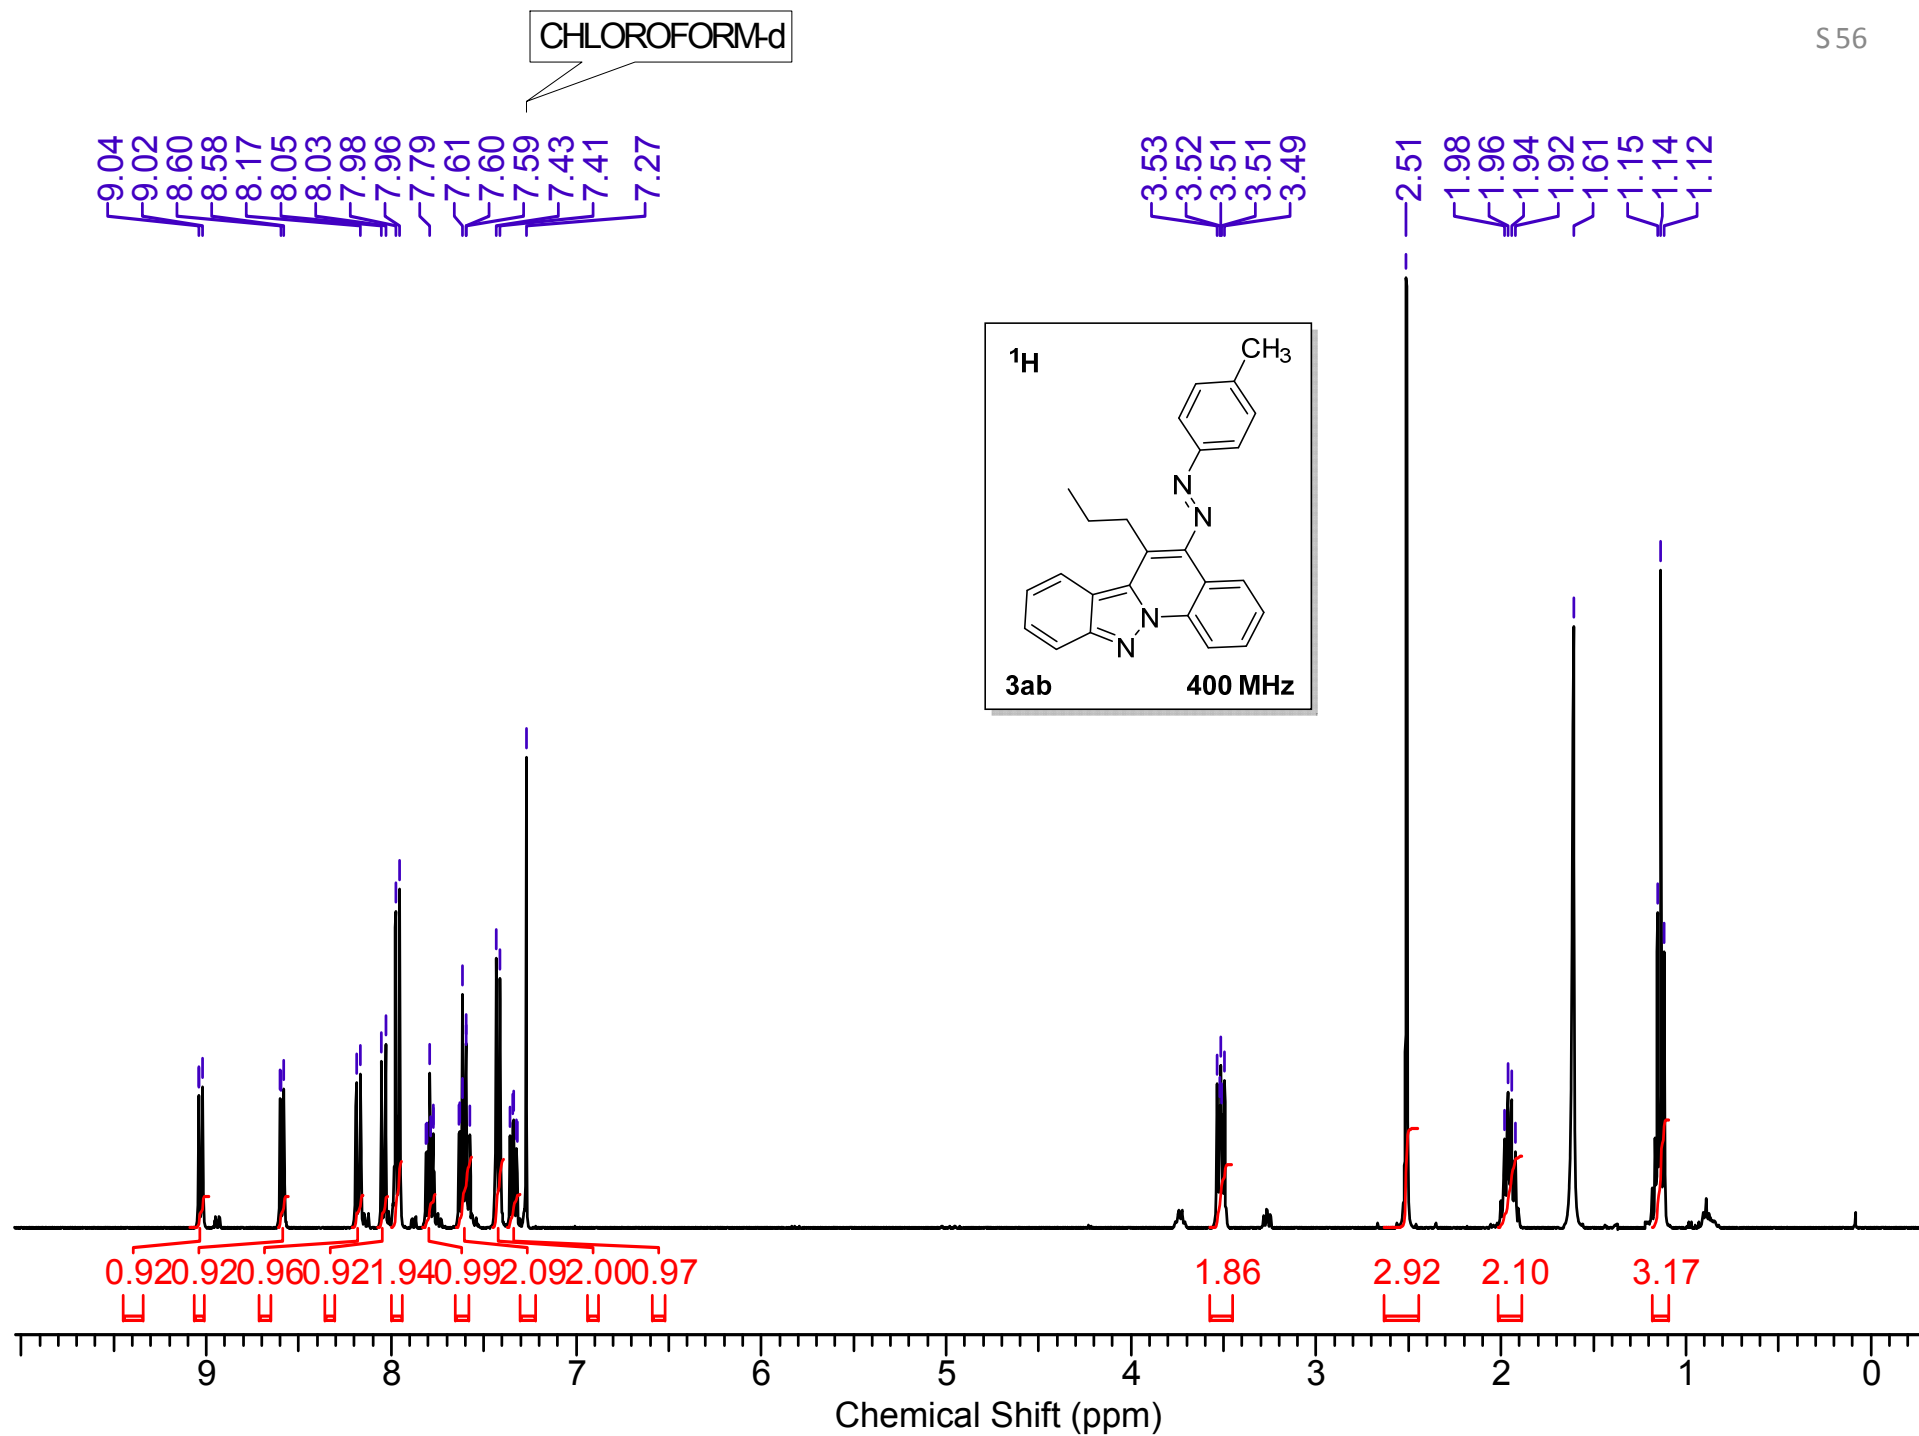



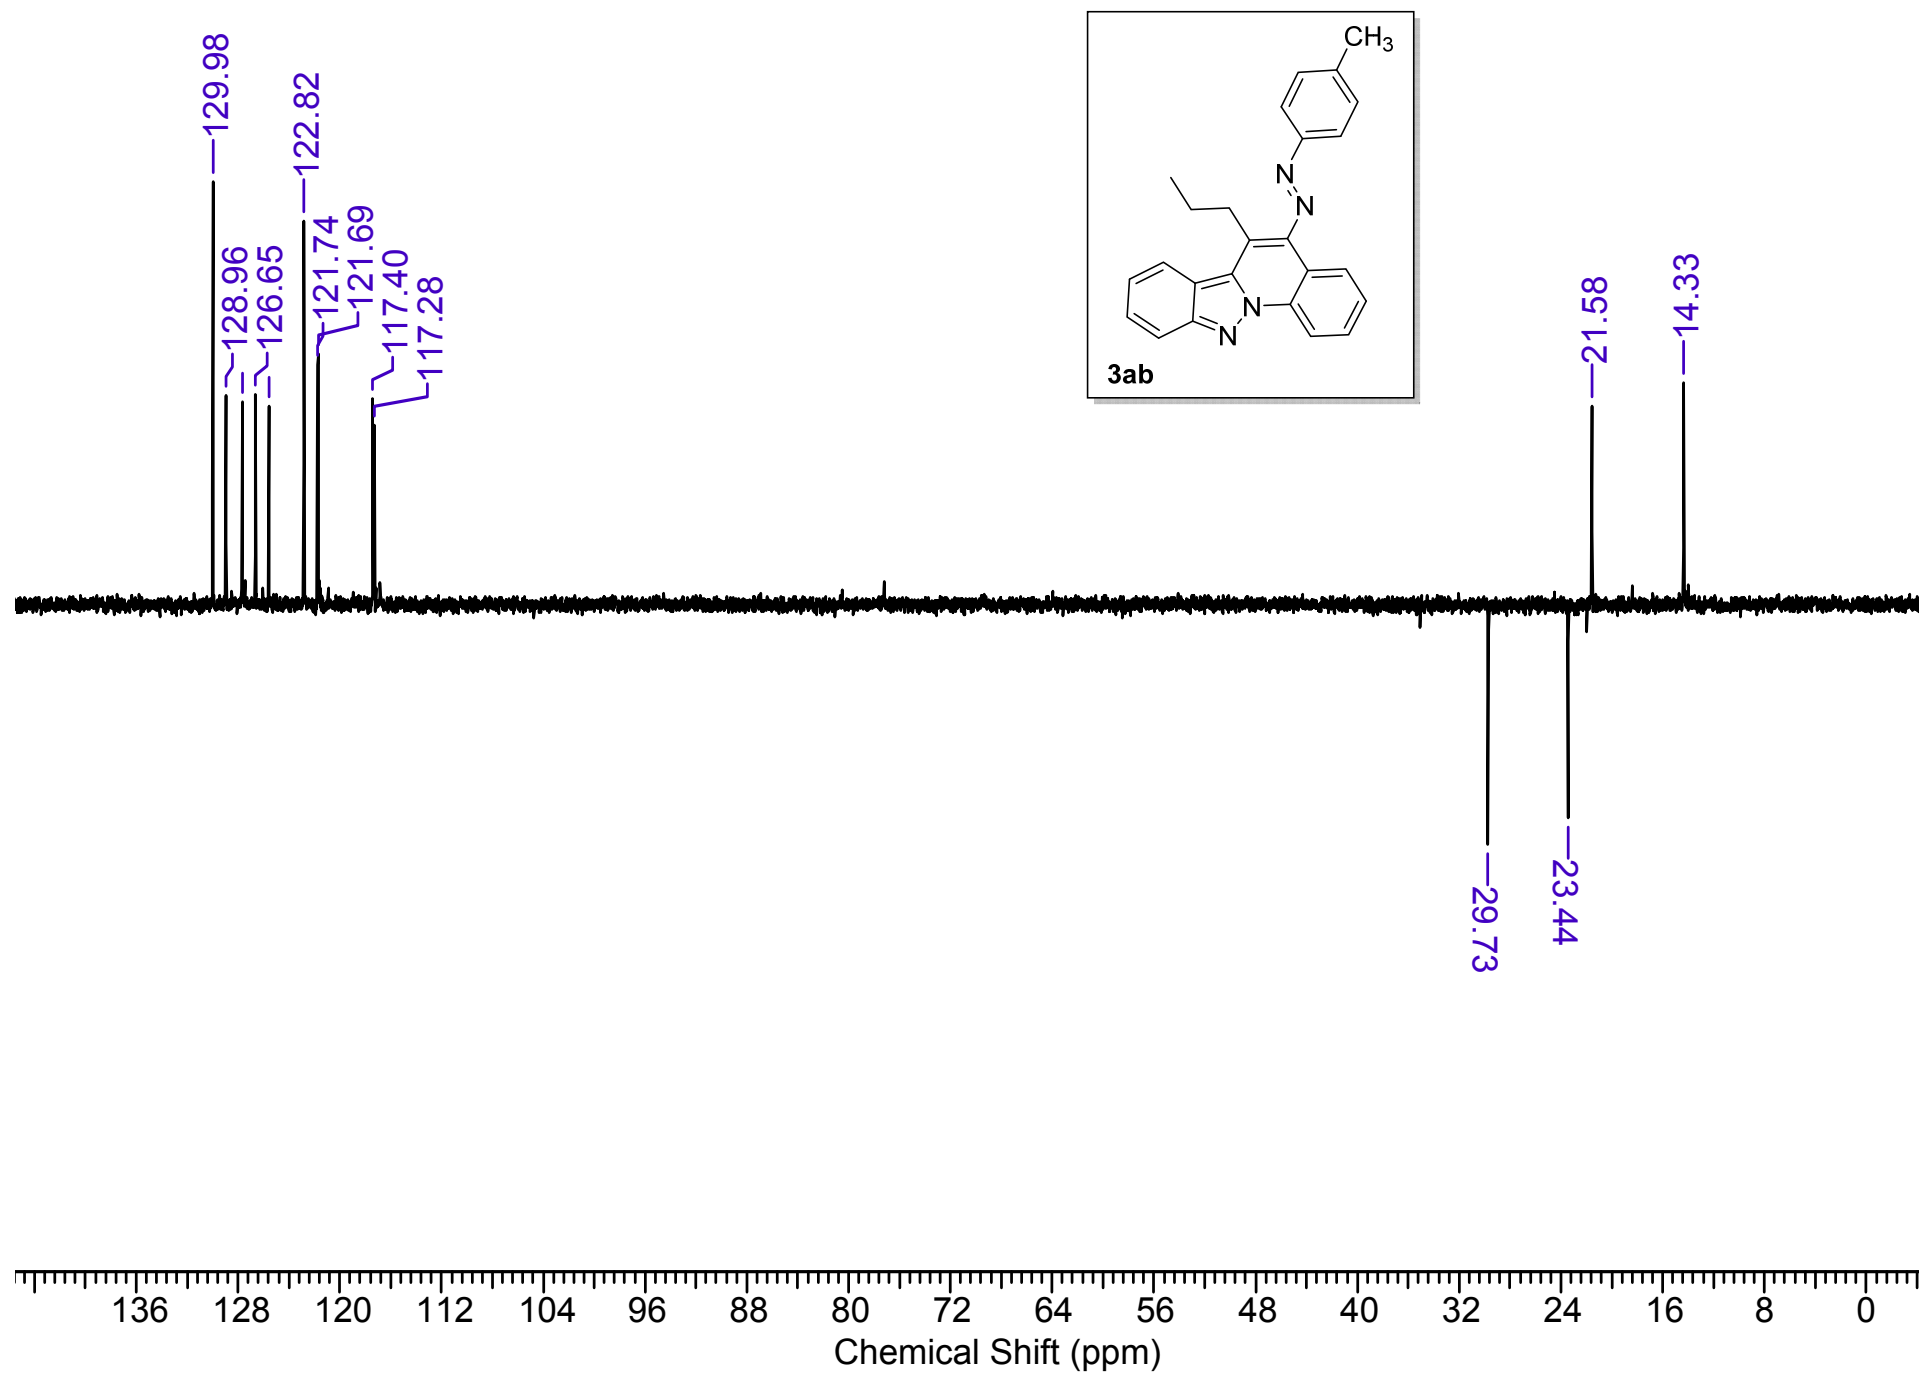

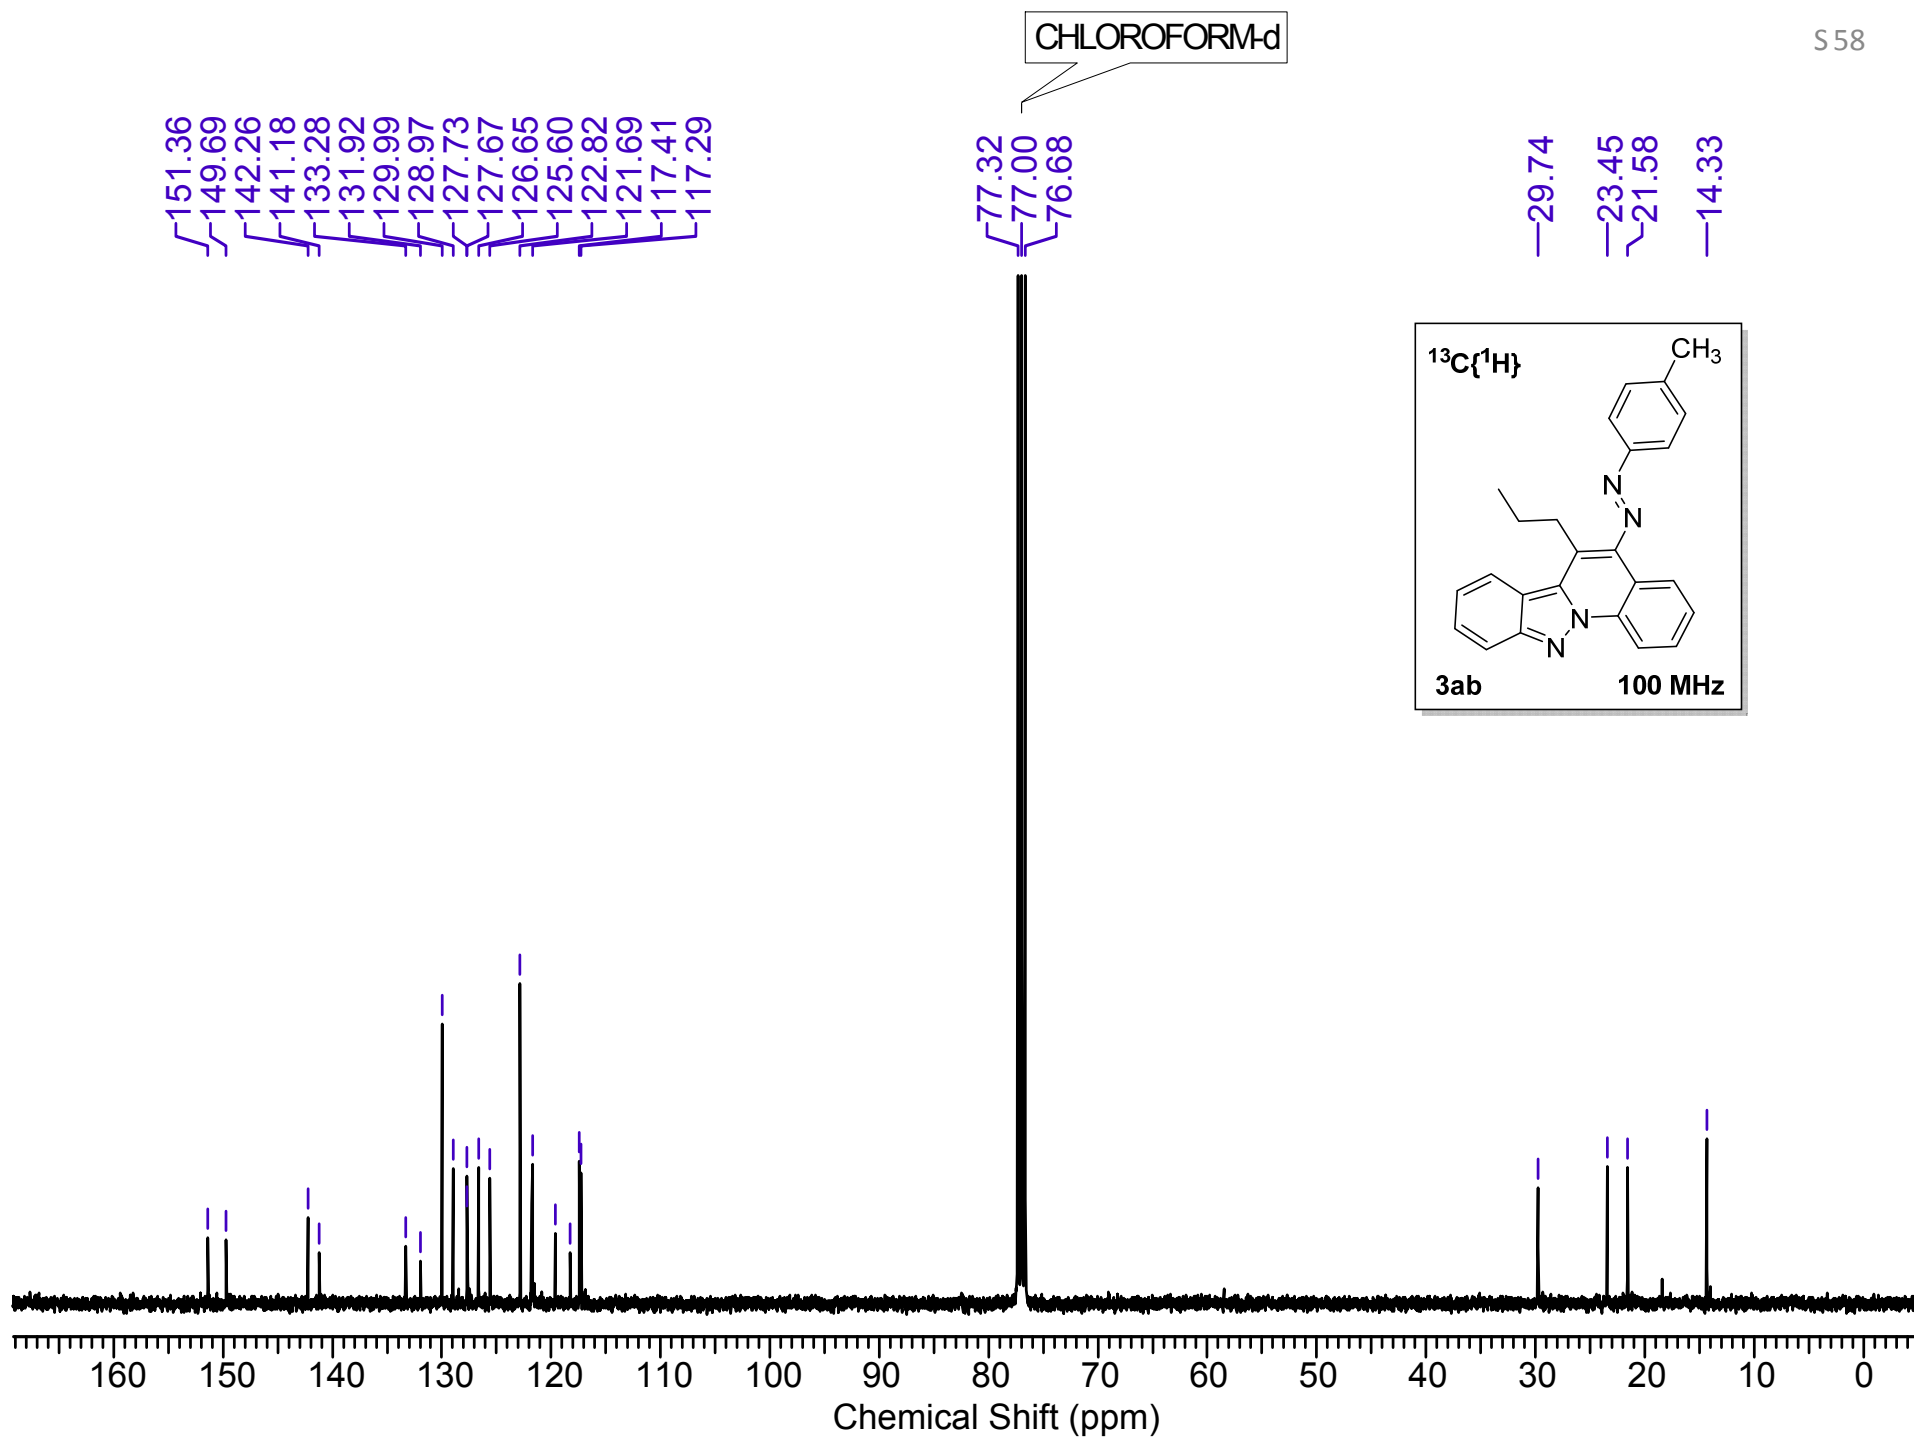

PD-690 #945 RT: 7.99 AV: 1 NL: 1.79E7  
T: FTMS + p ESI Full ms [100.0000-1500.0000]

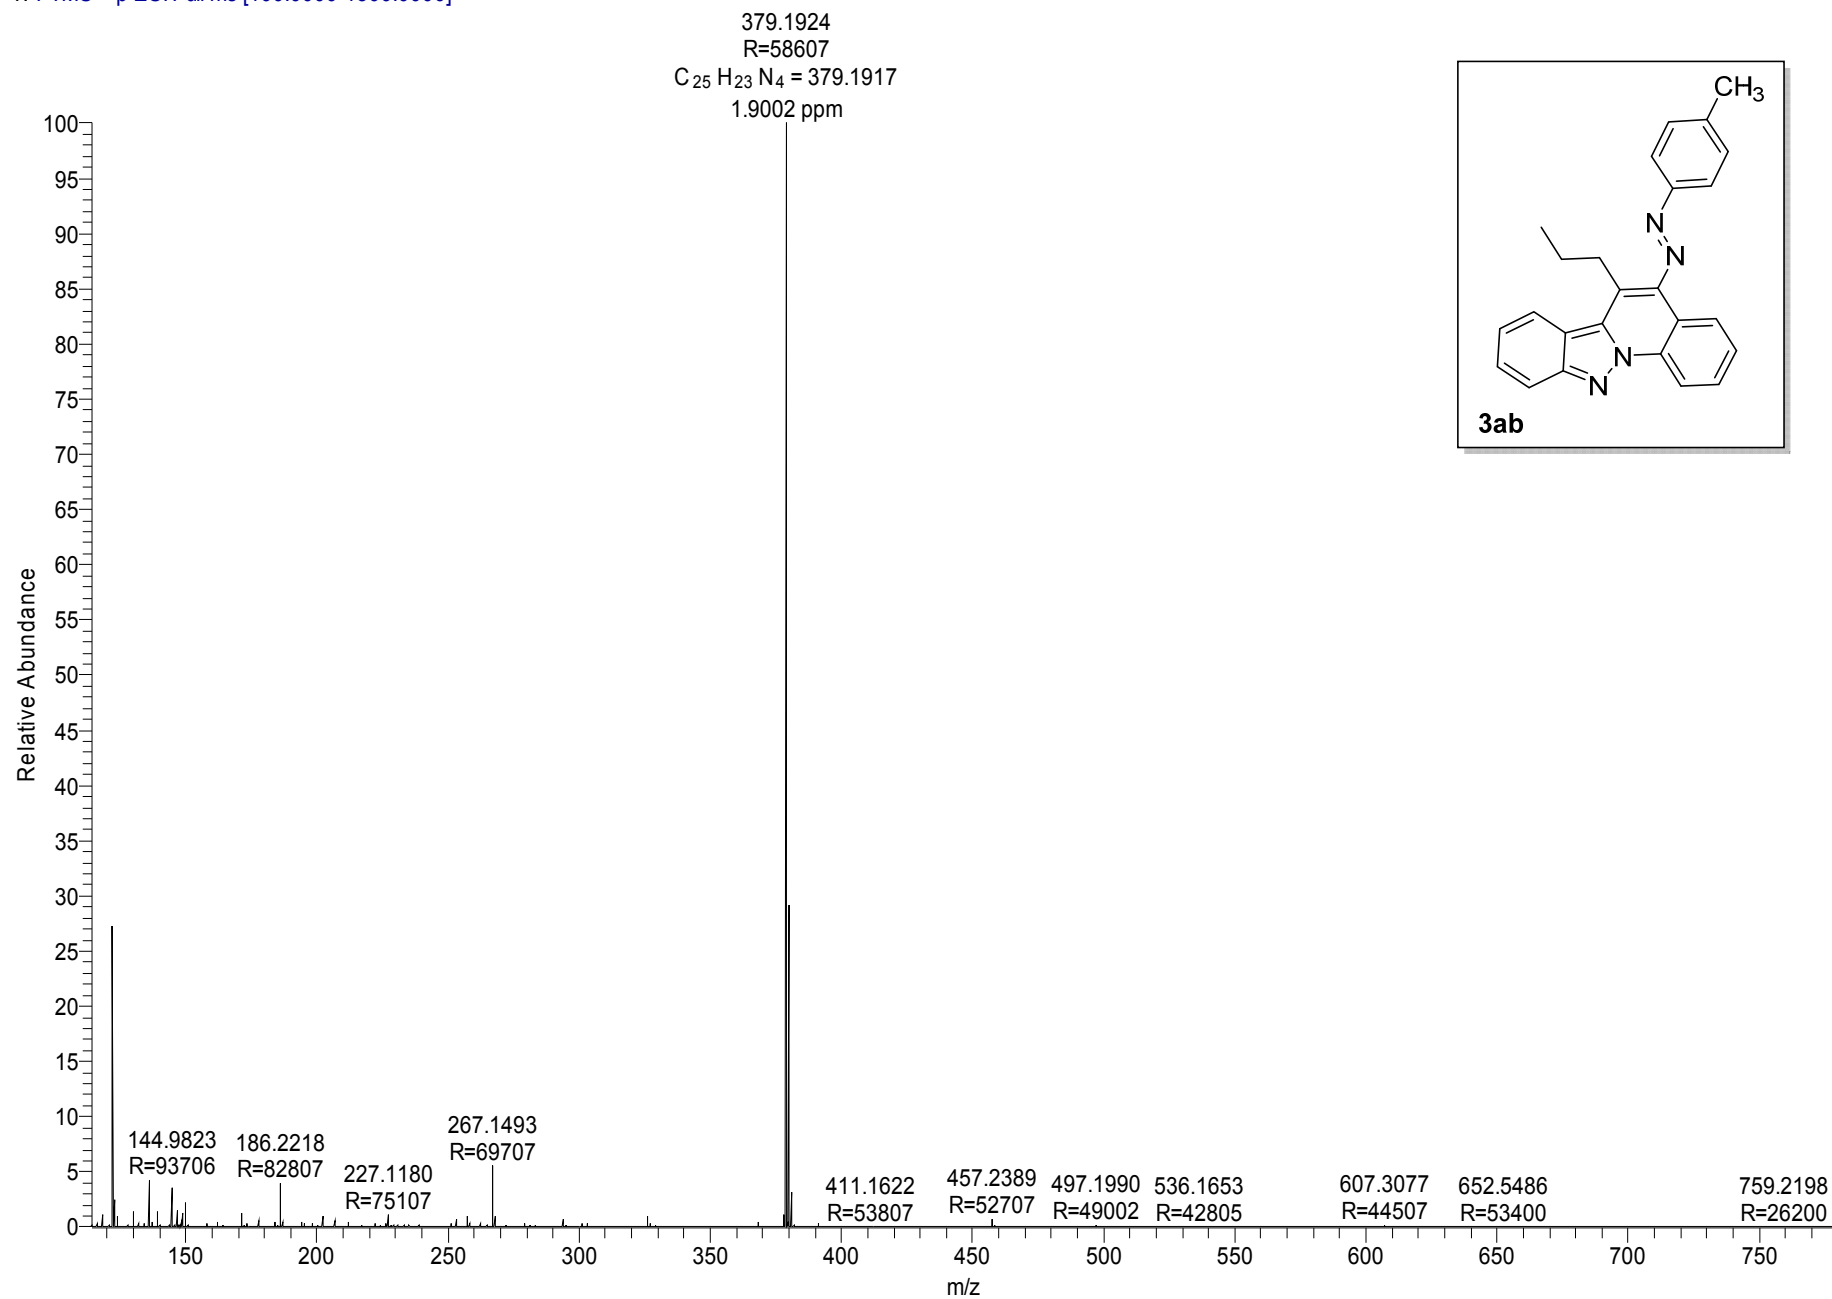

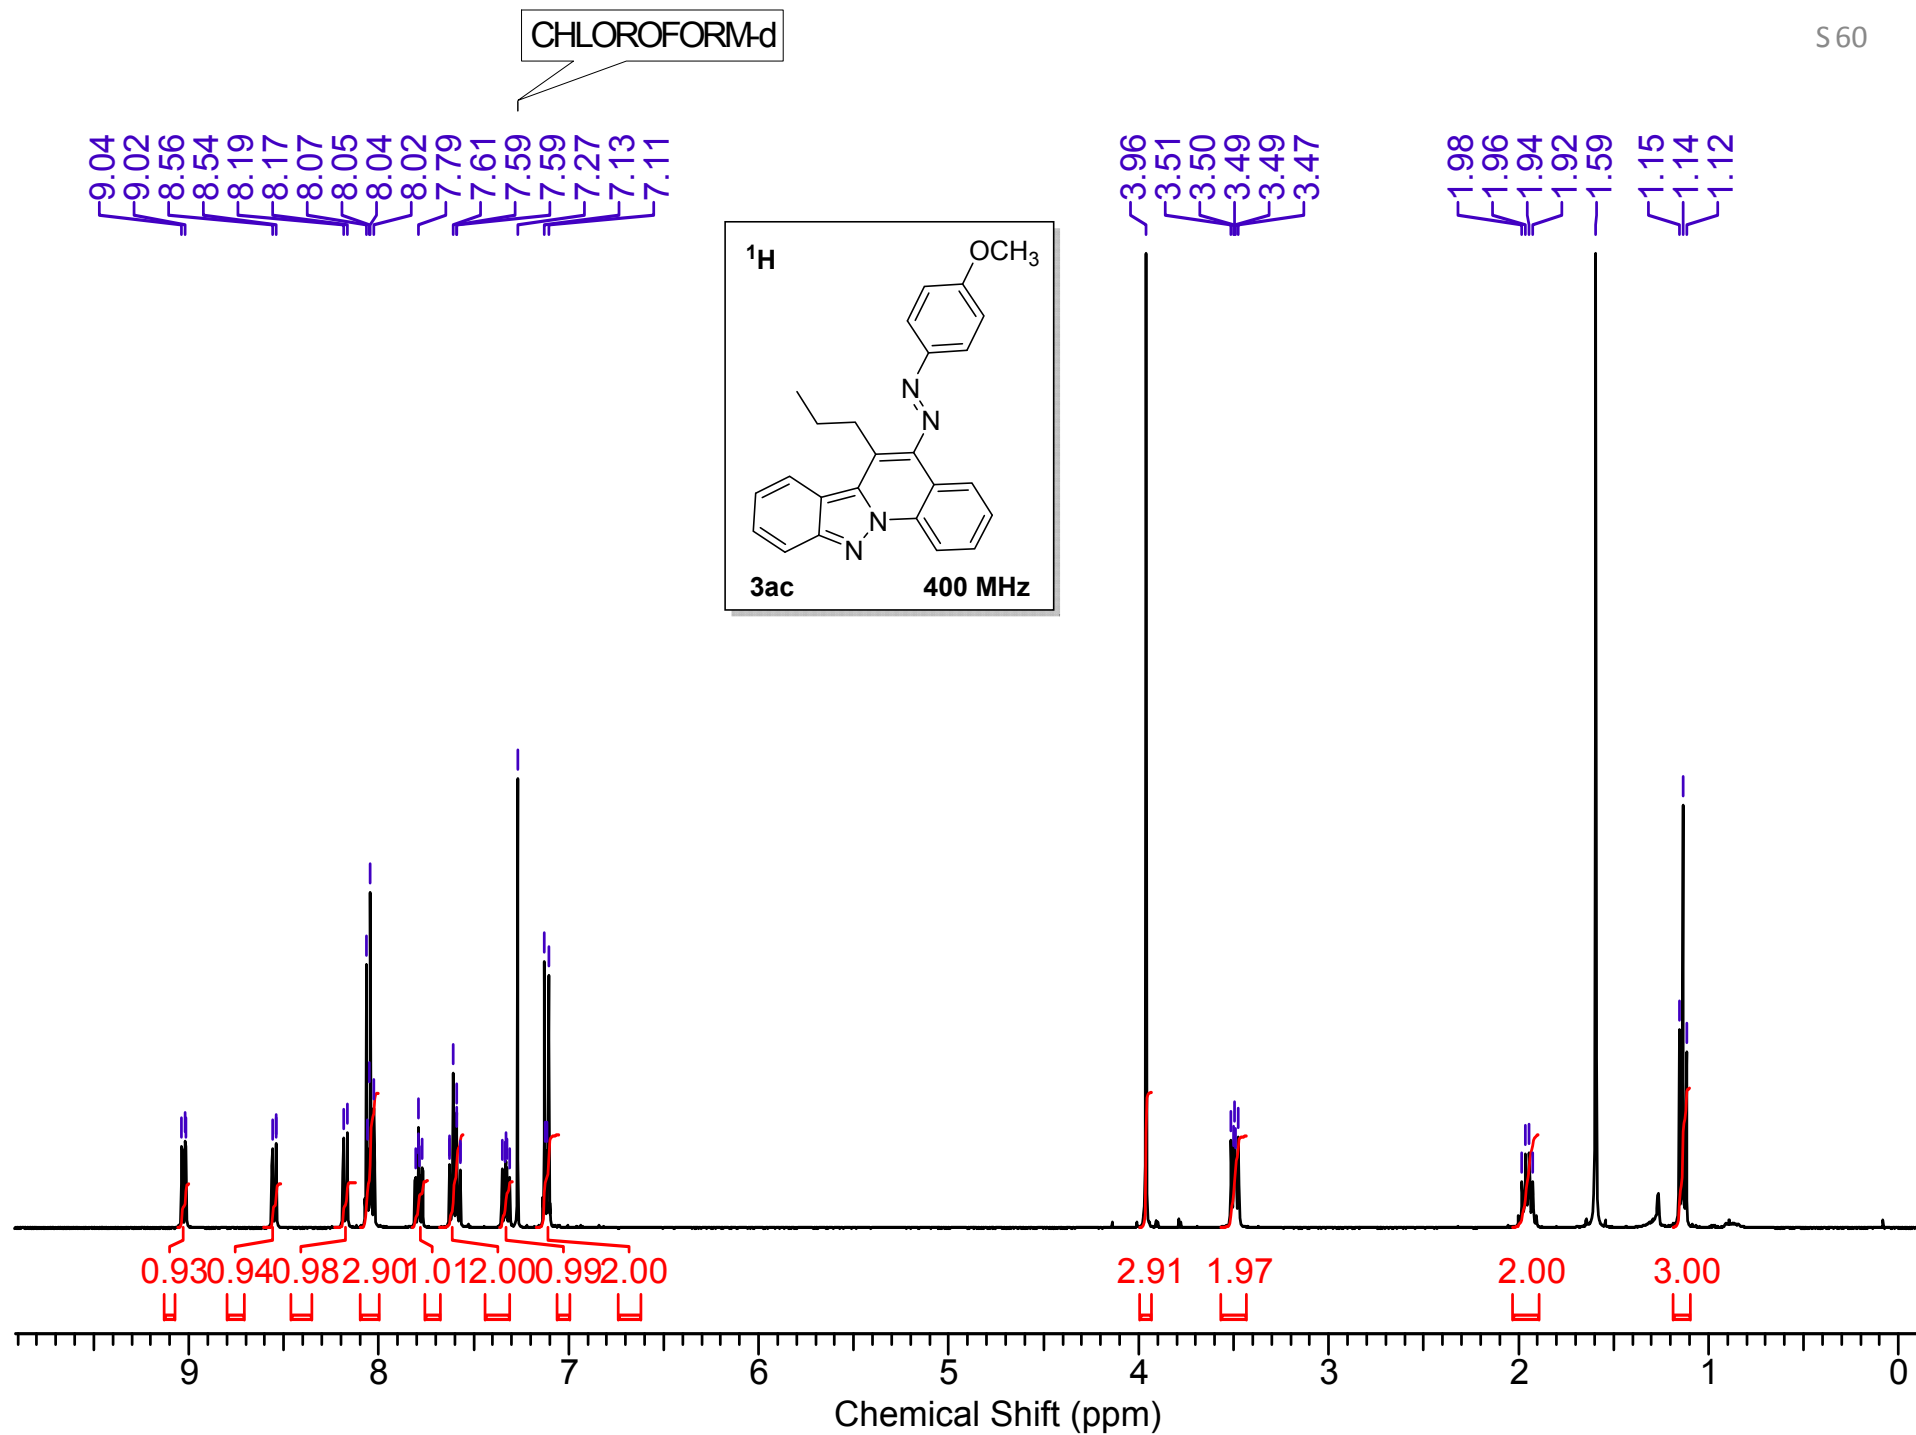

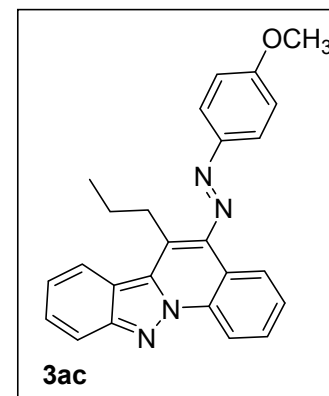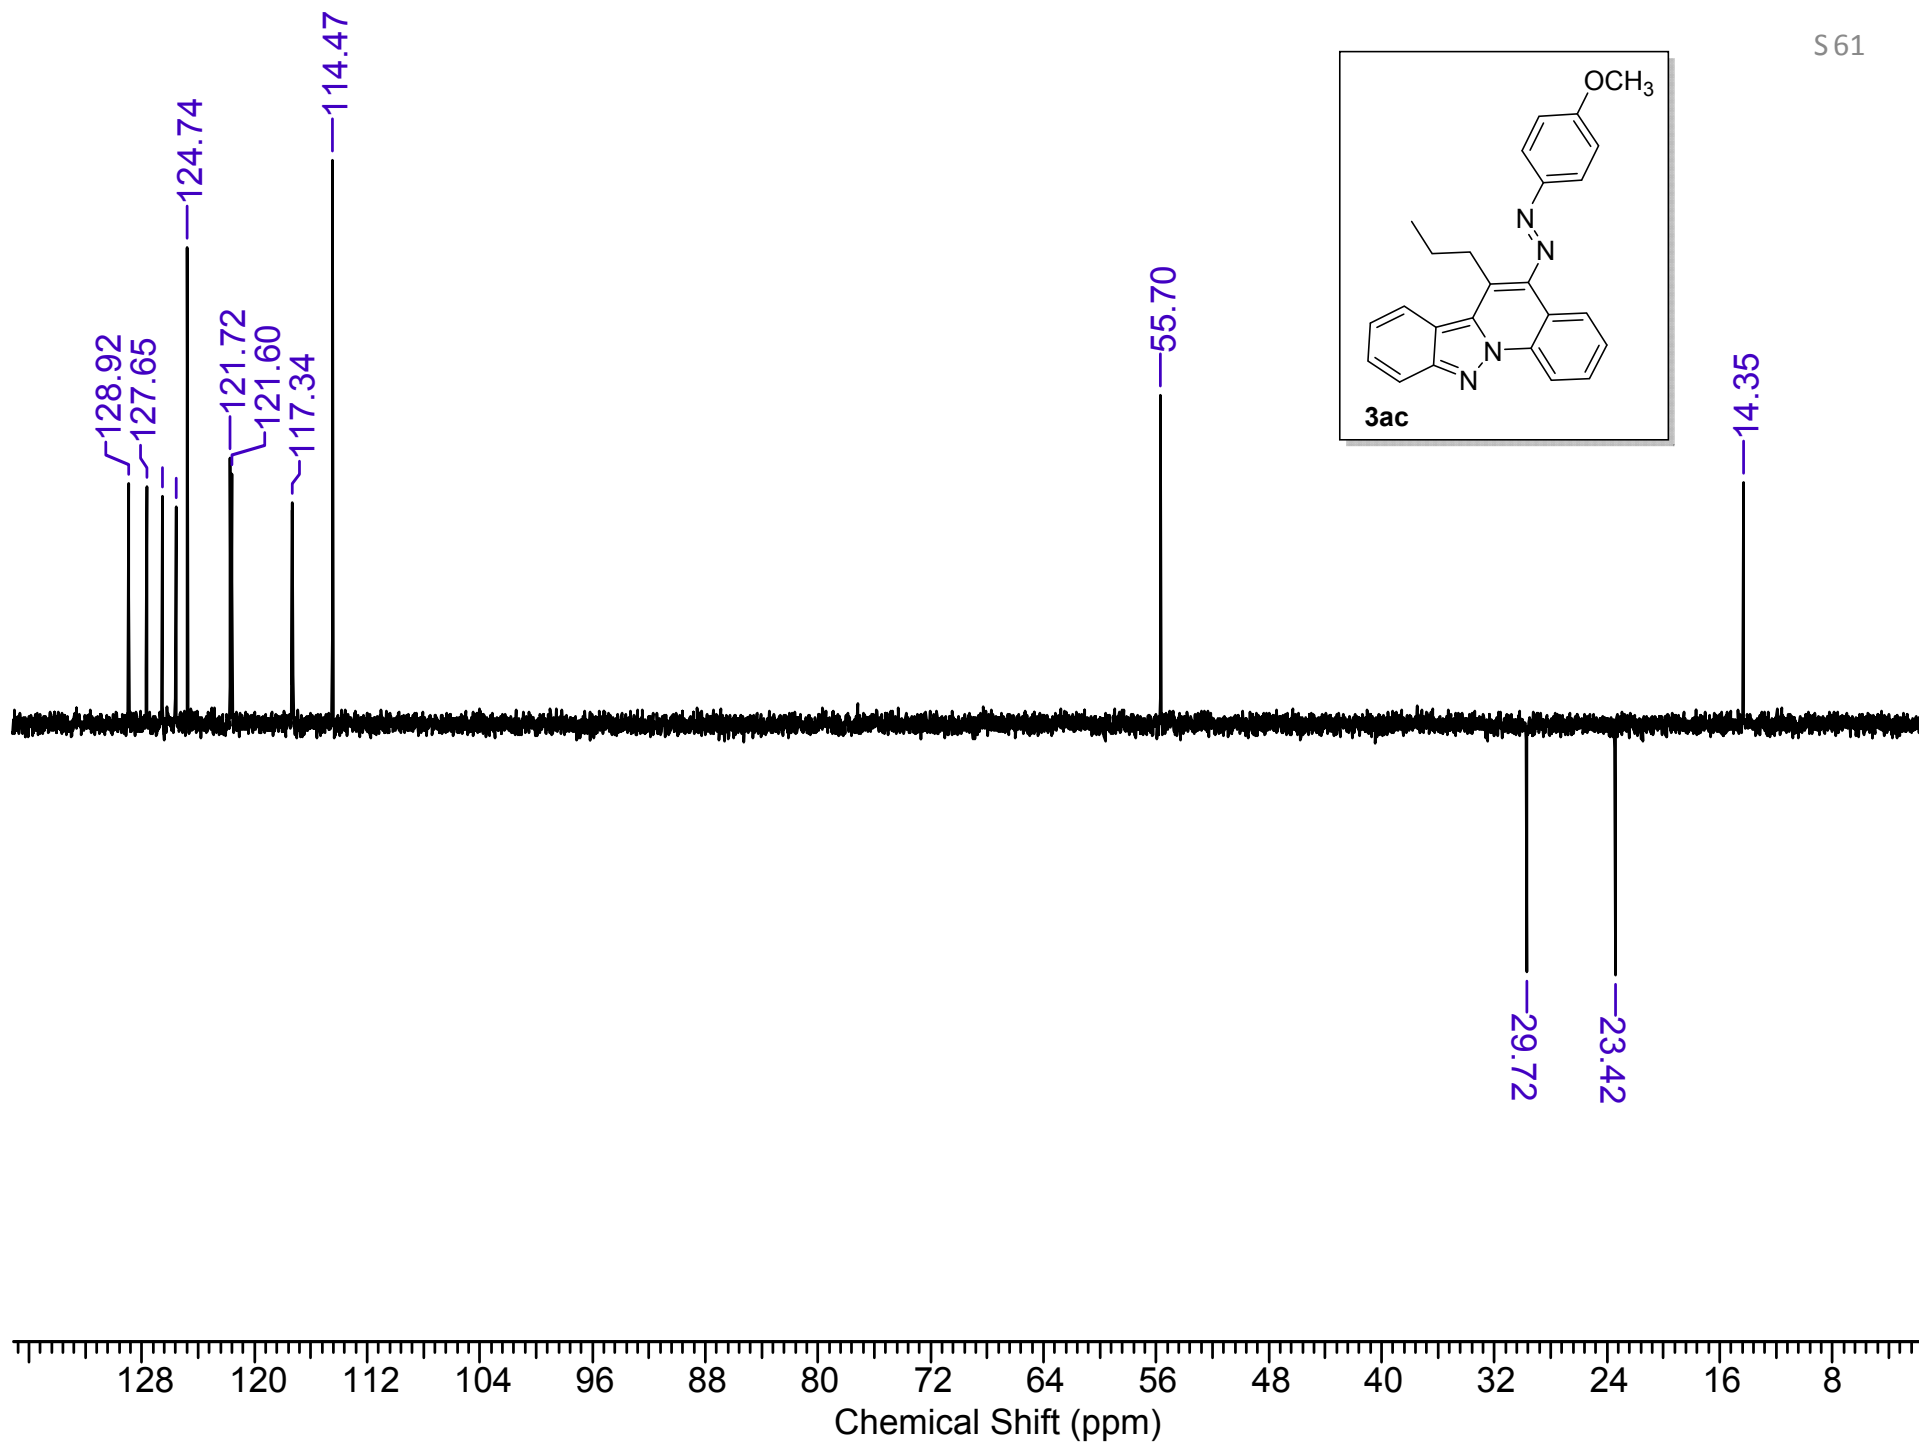

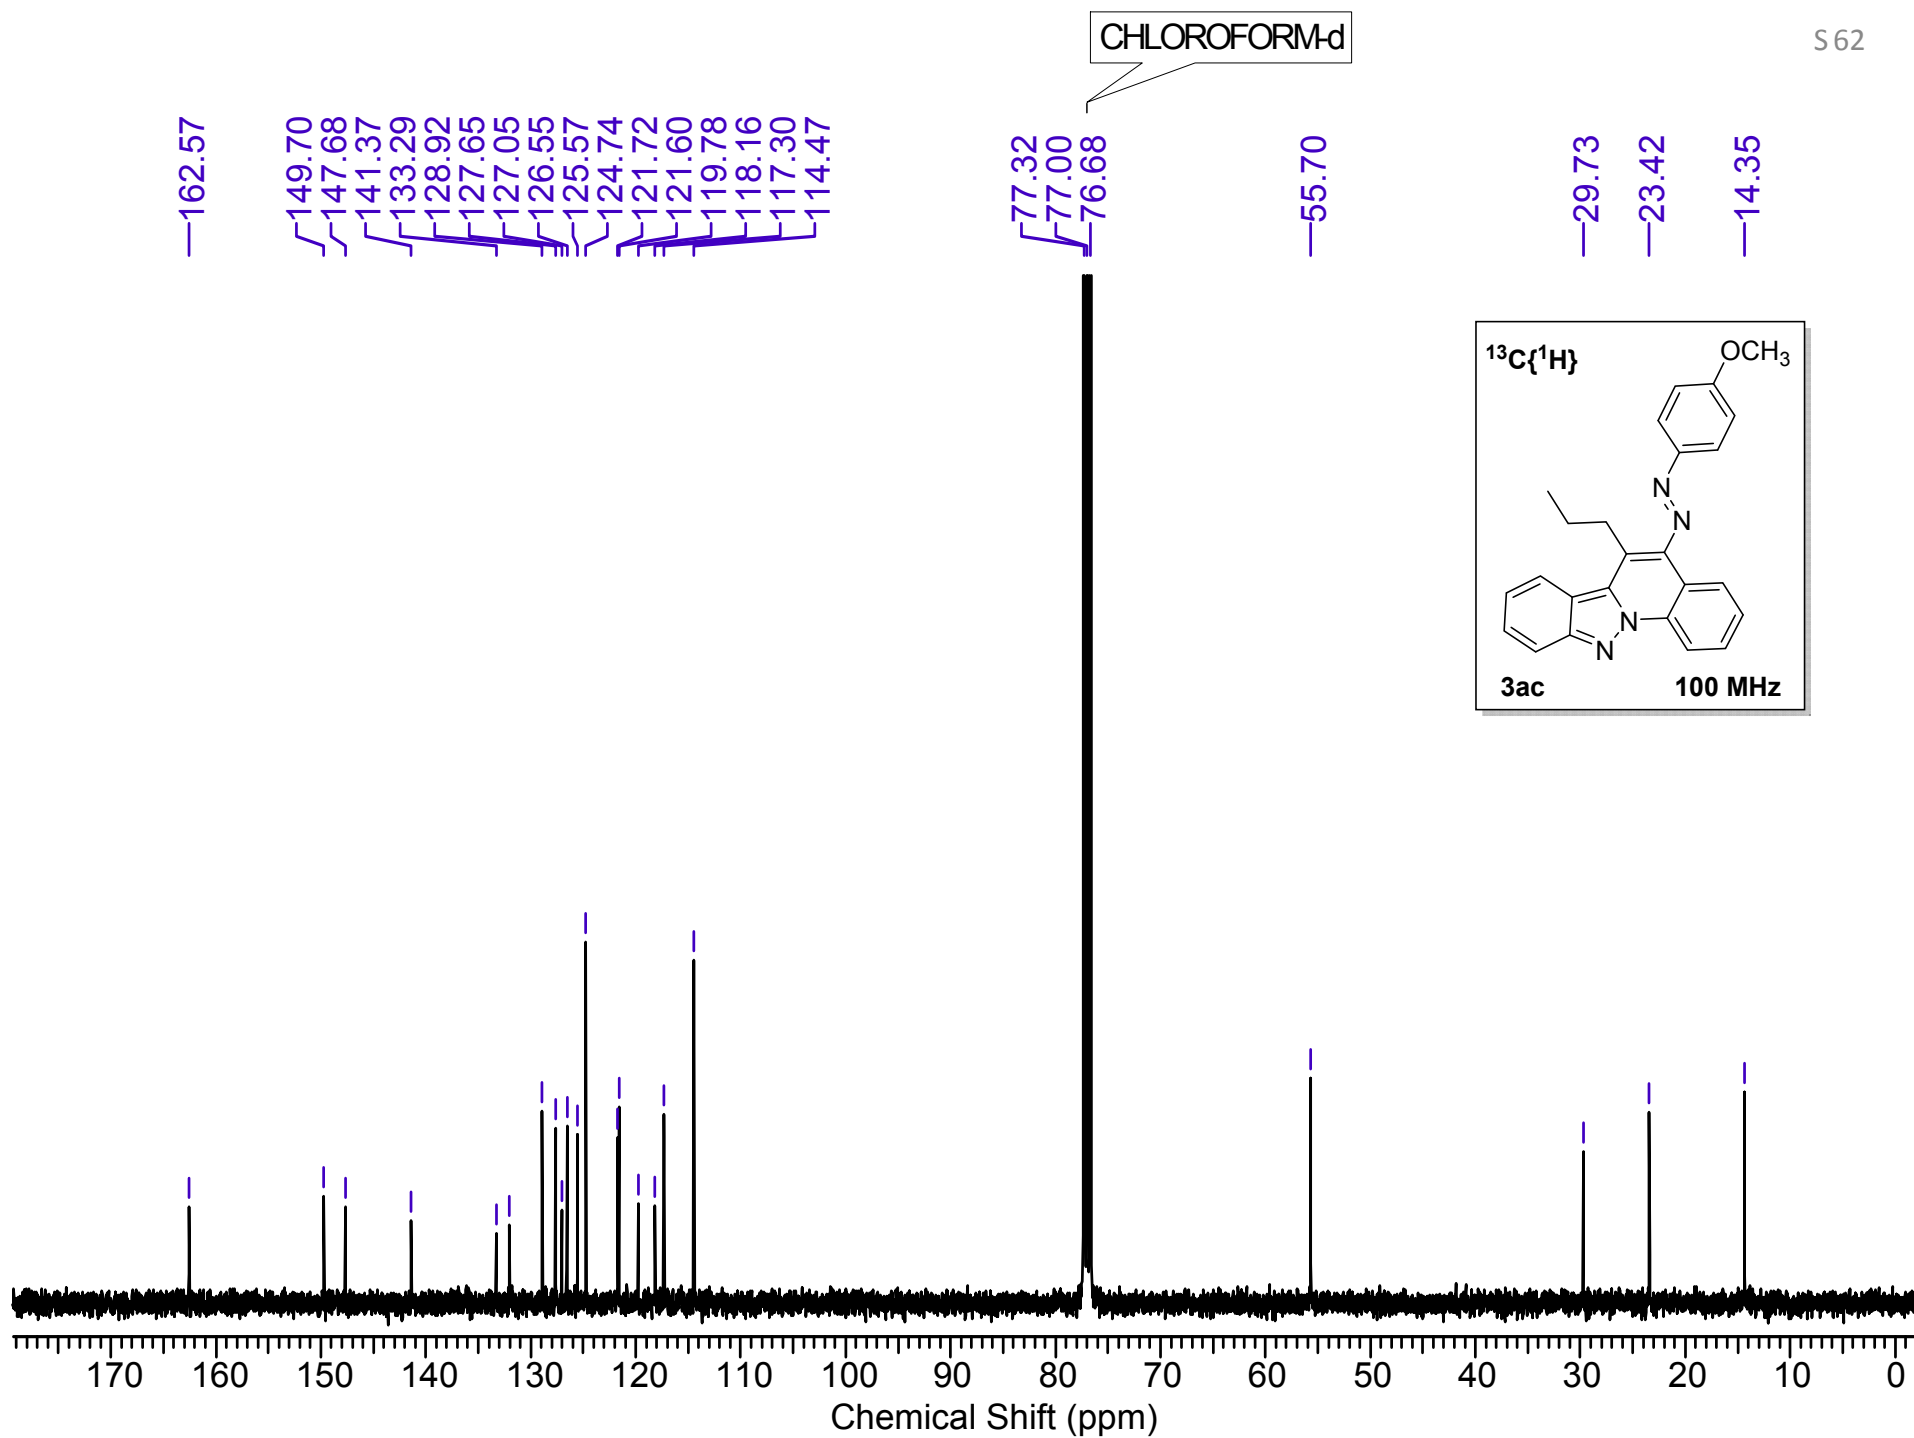

PD-696 #763 RT: 6.43 AV: 1 NL: 2.57E7  
T: FTMS + p ESI Full ms [100.0000-1500.0000]

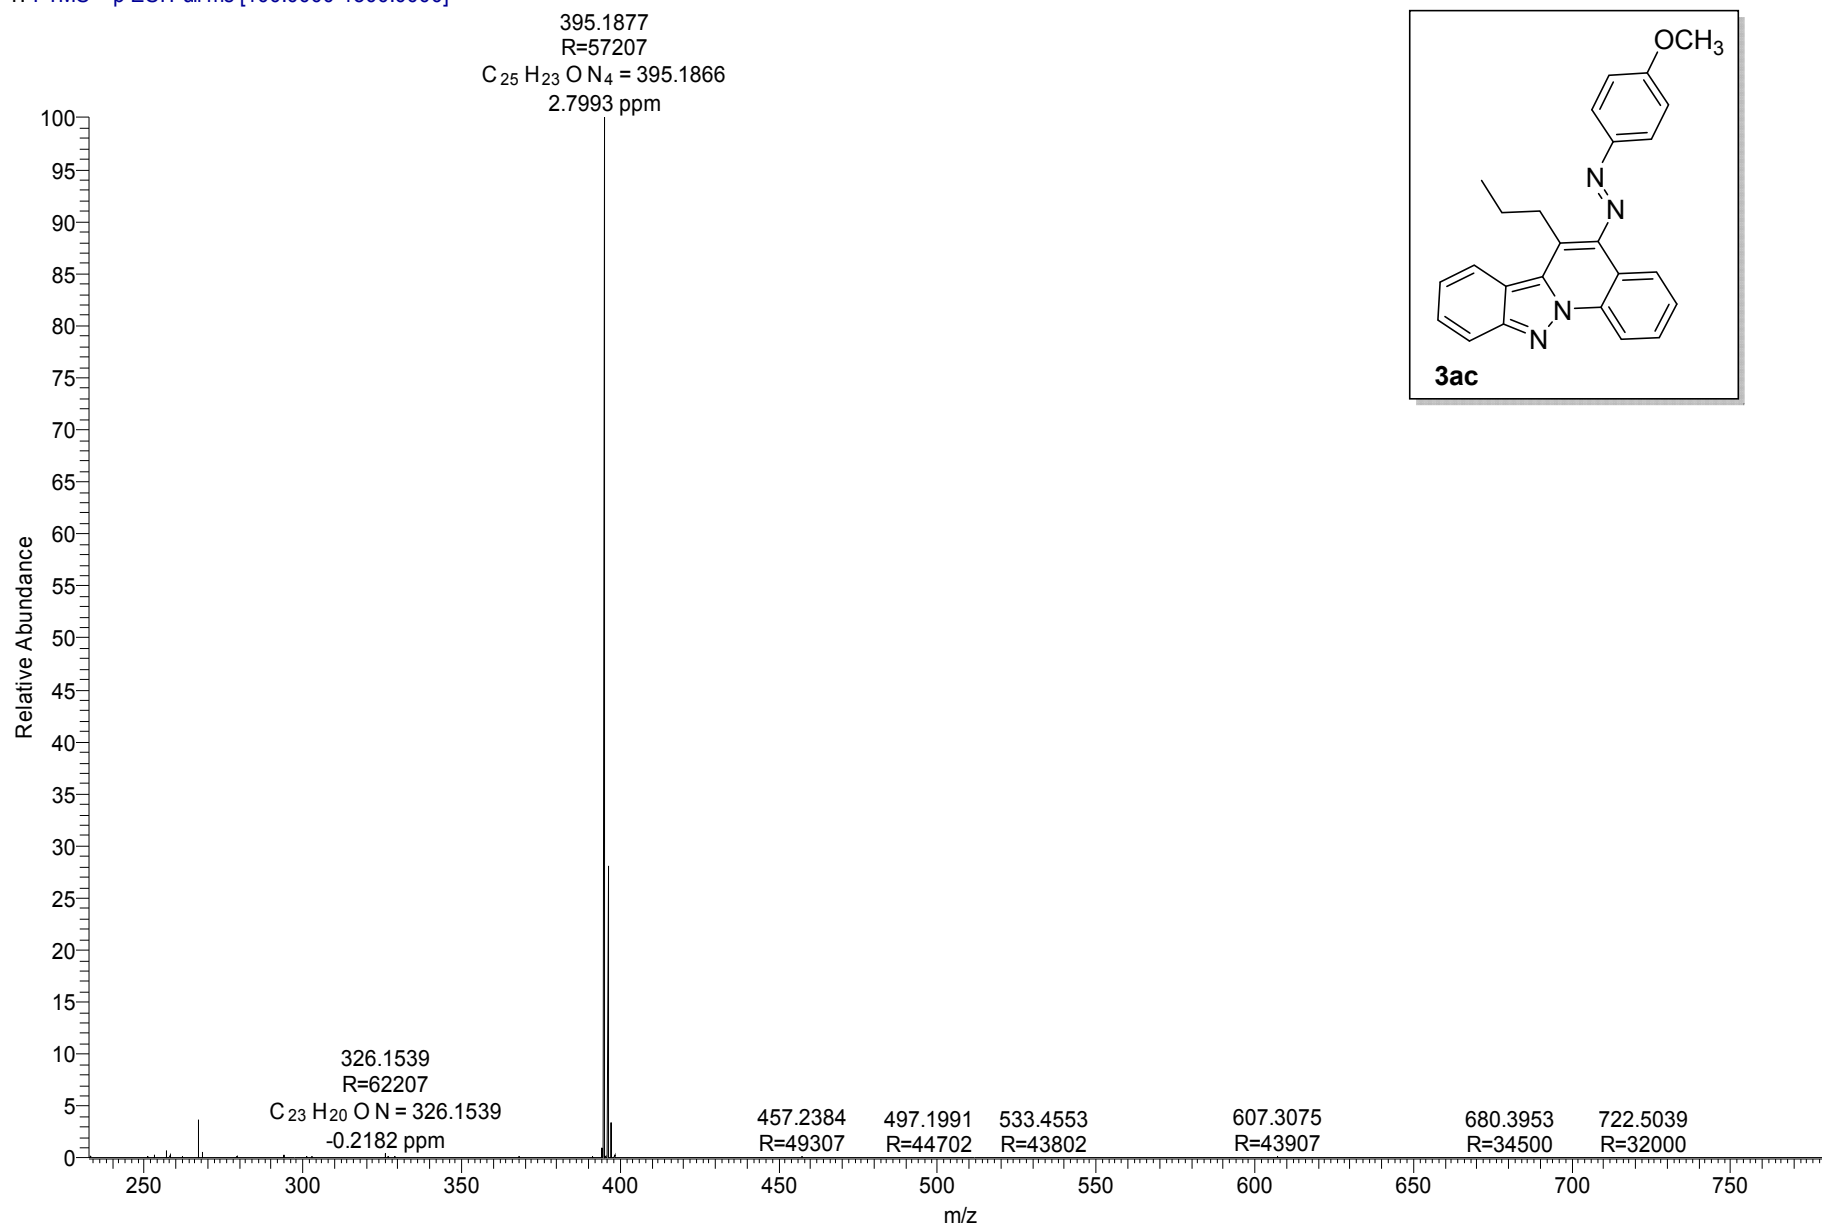

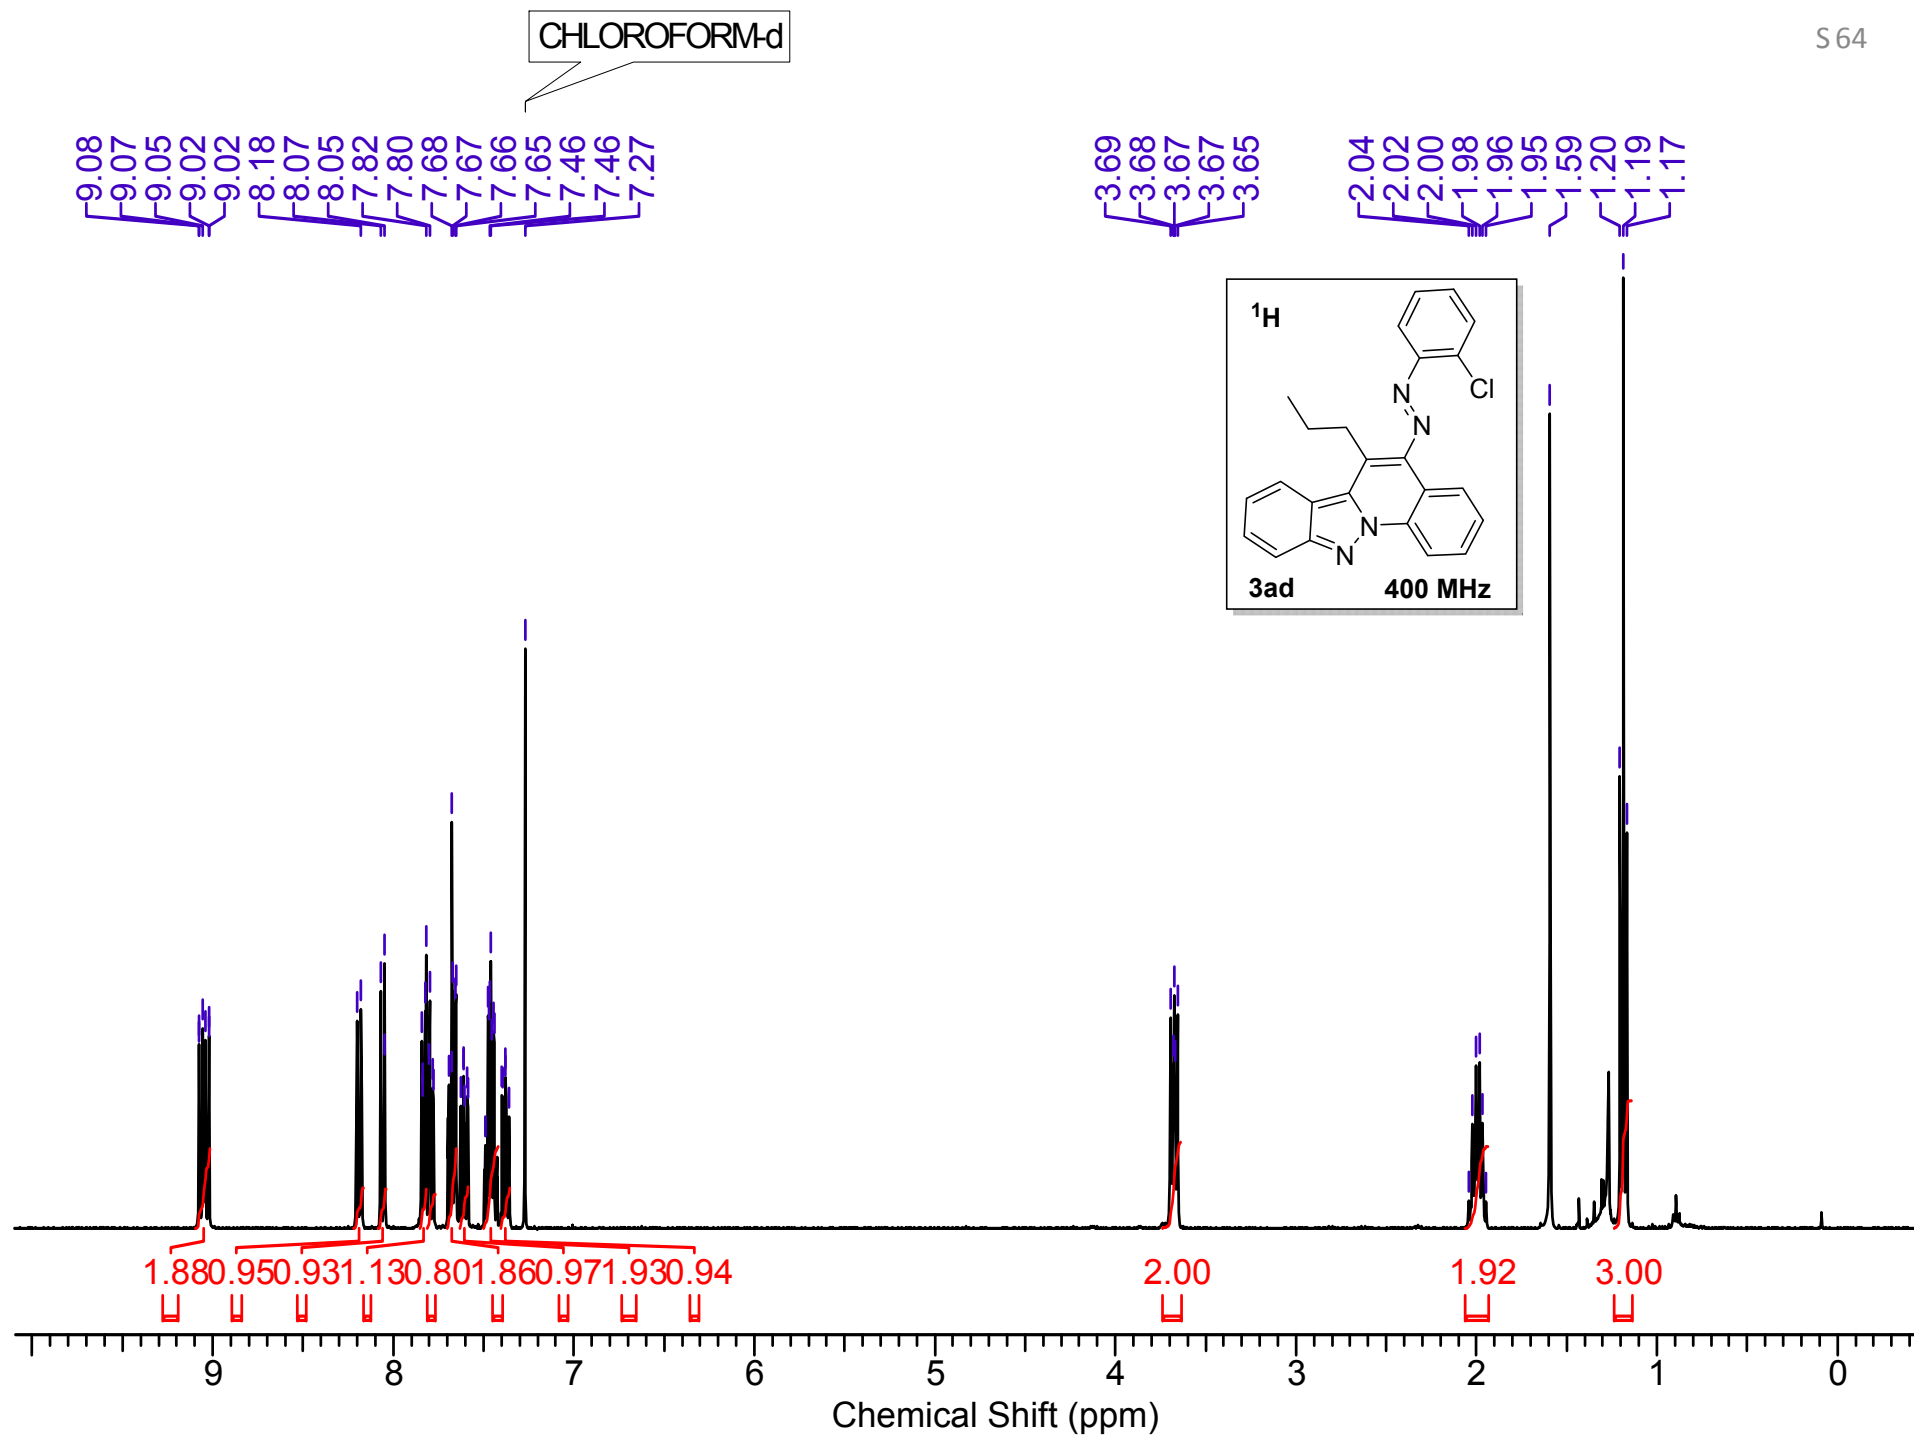



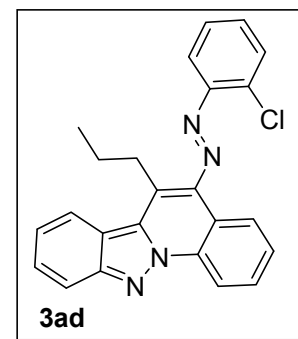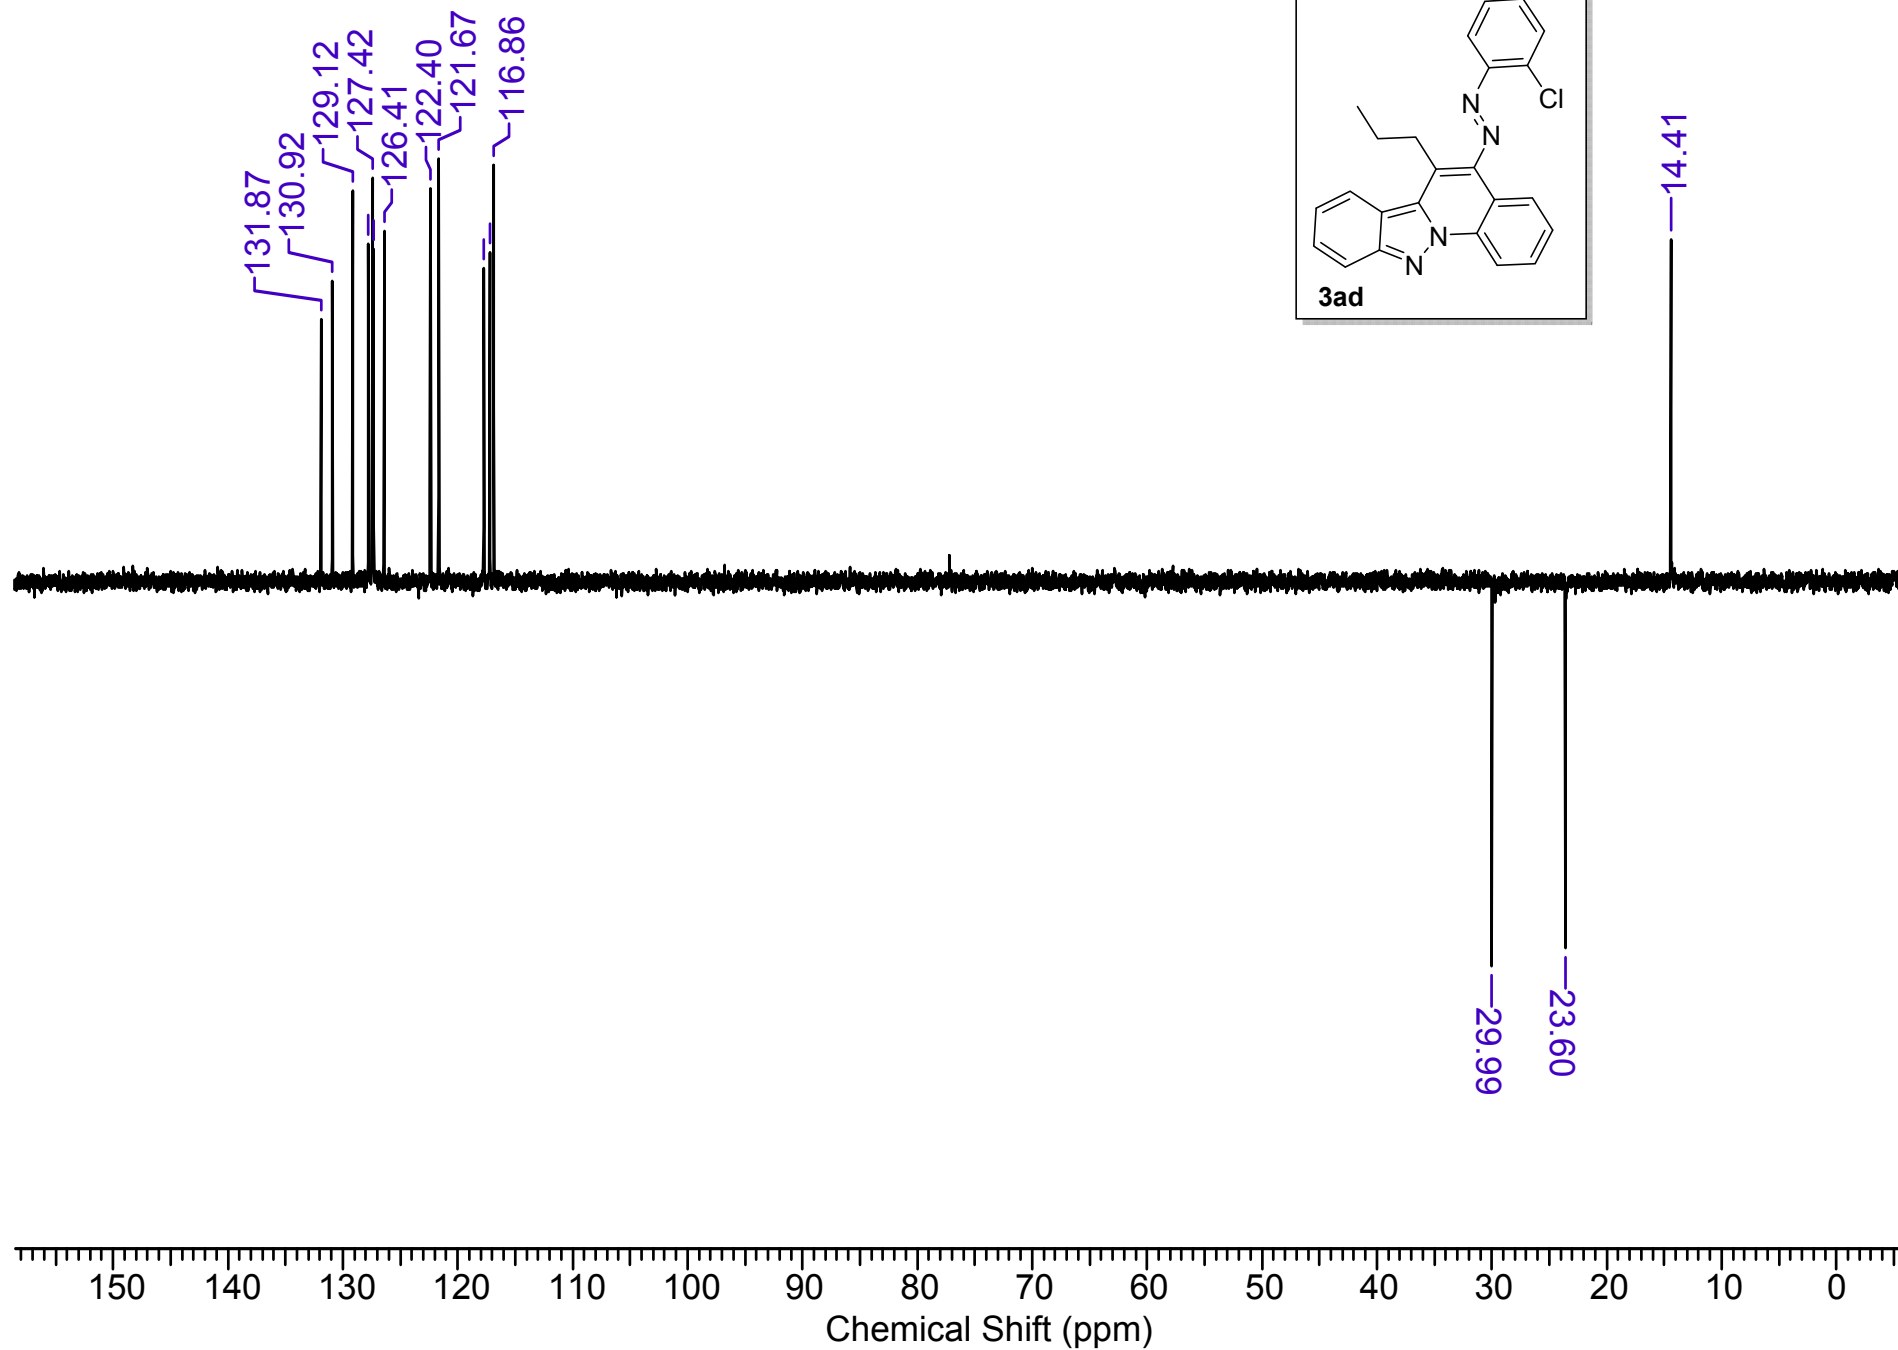

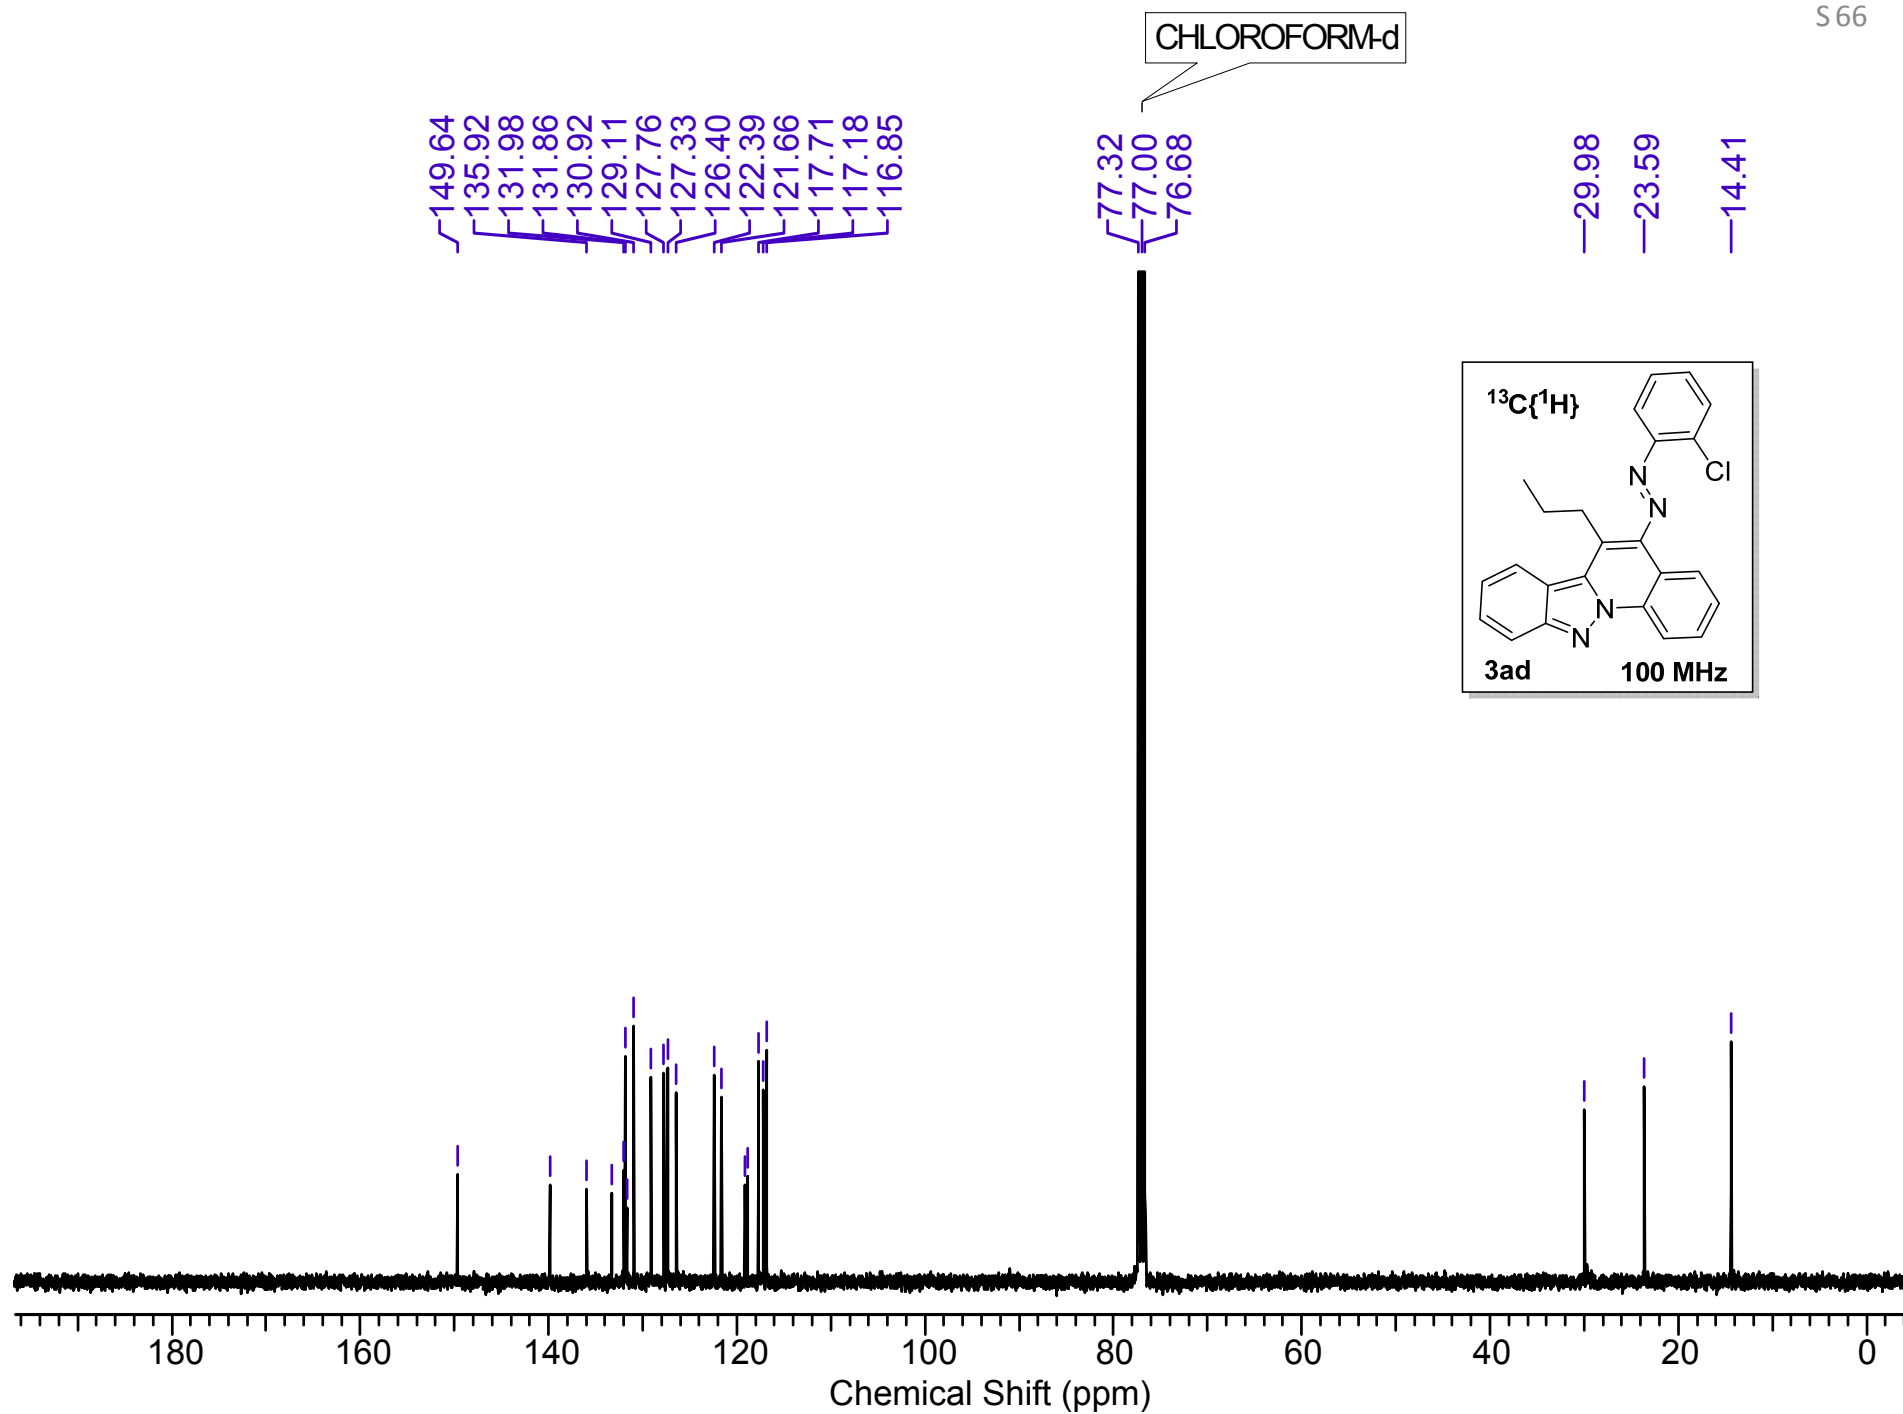

PD-703 #61 RT: 0.52 AV: 1 NL: 1.03E5  
T: FTMS + p ESI Full ms [100.0000-1500.0000]

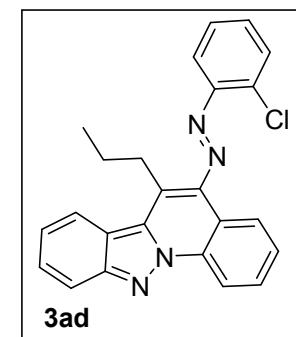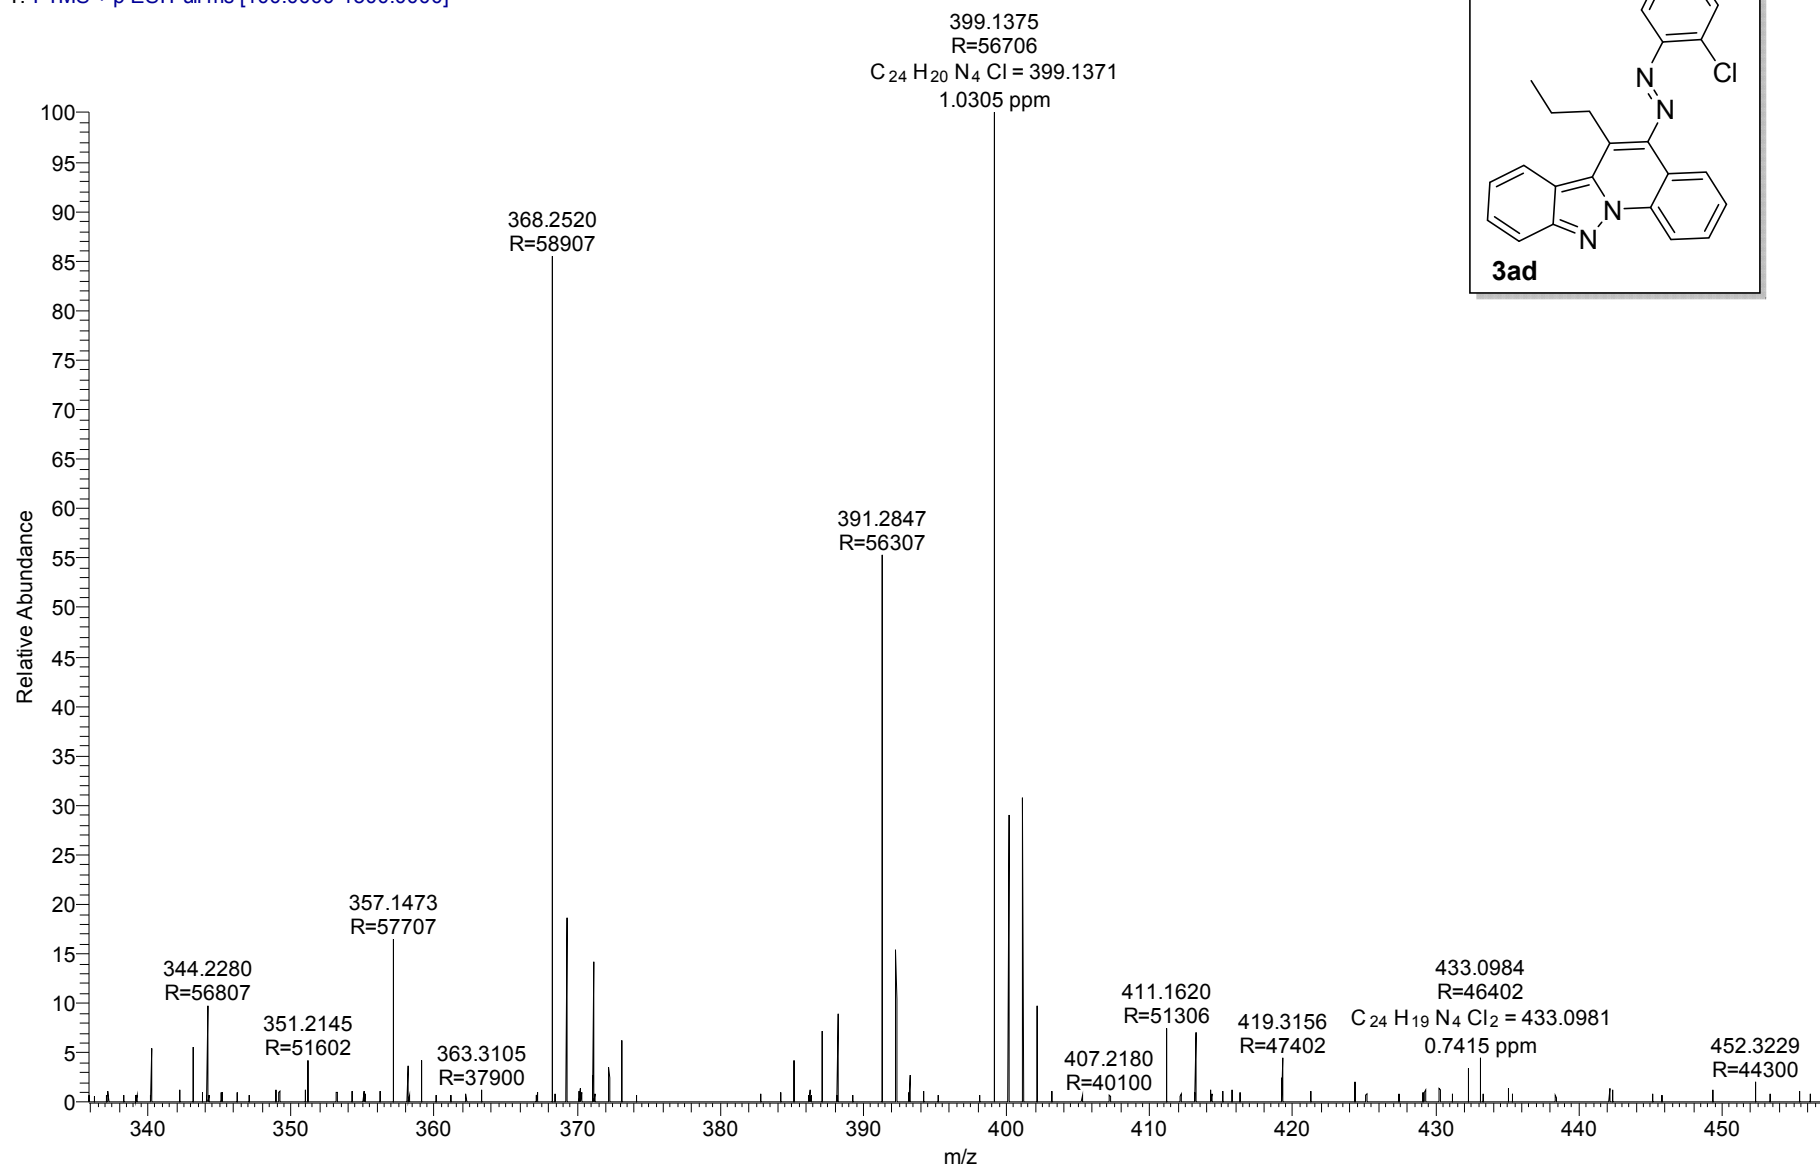

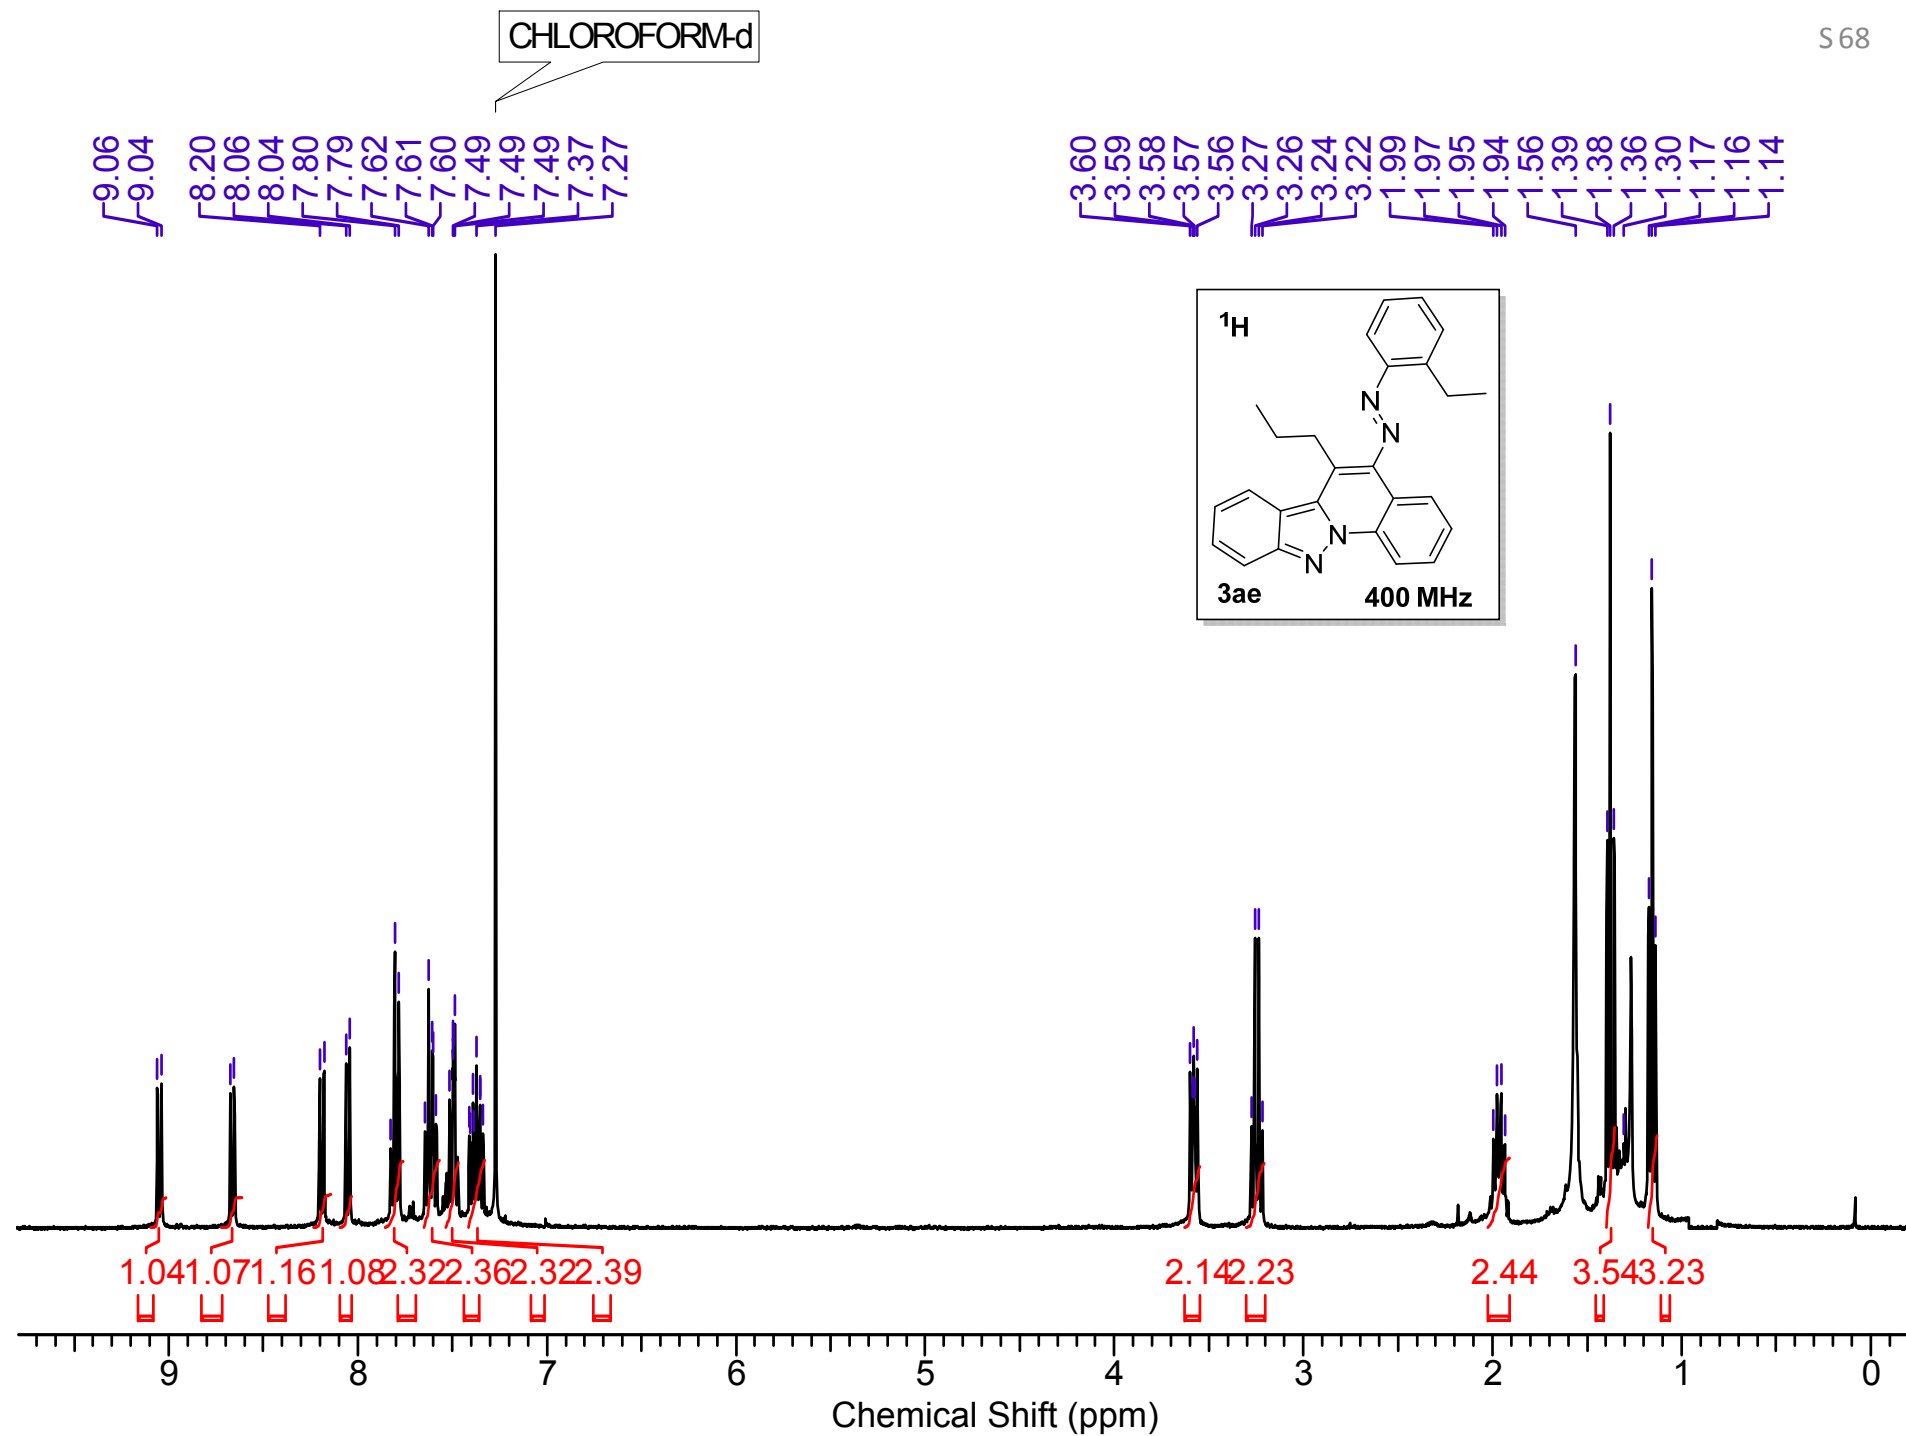

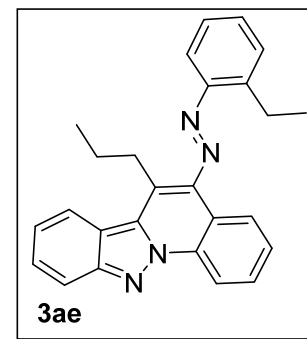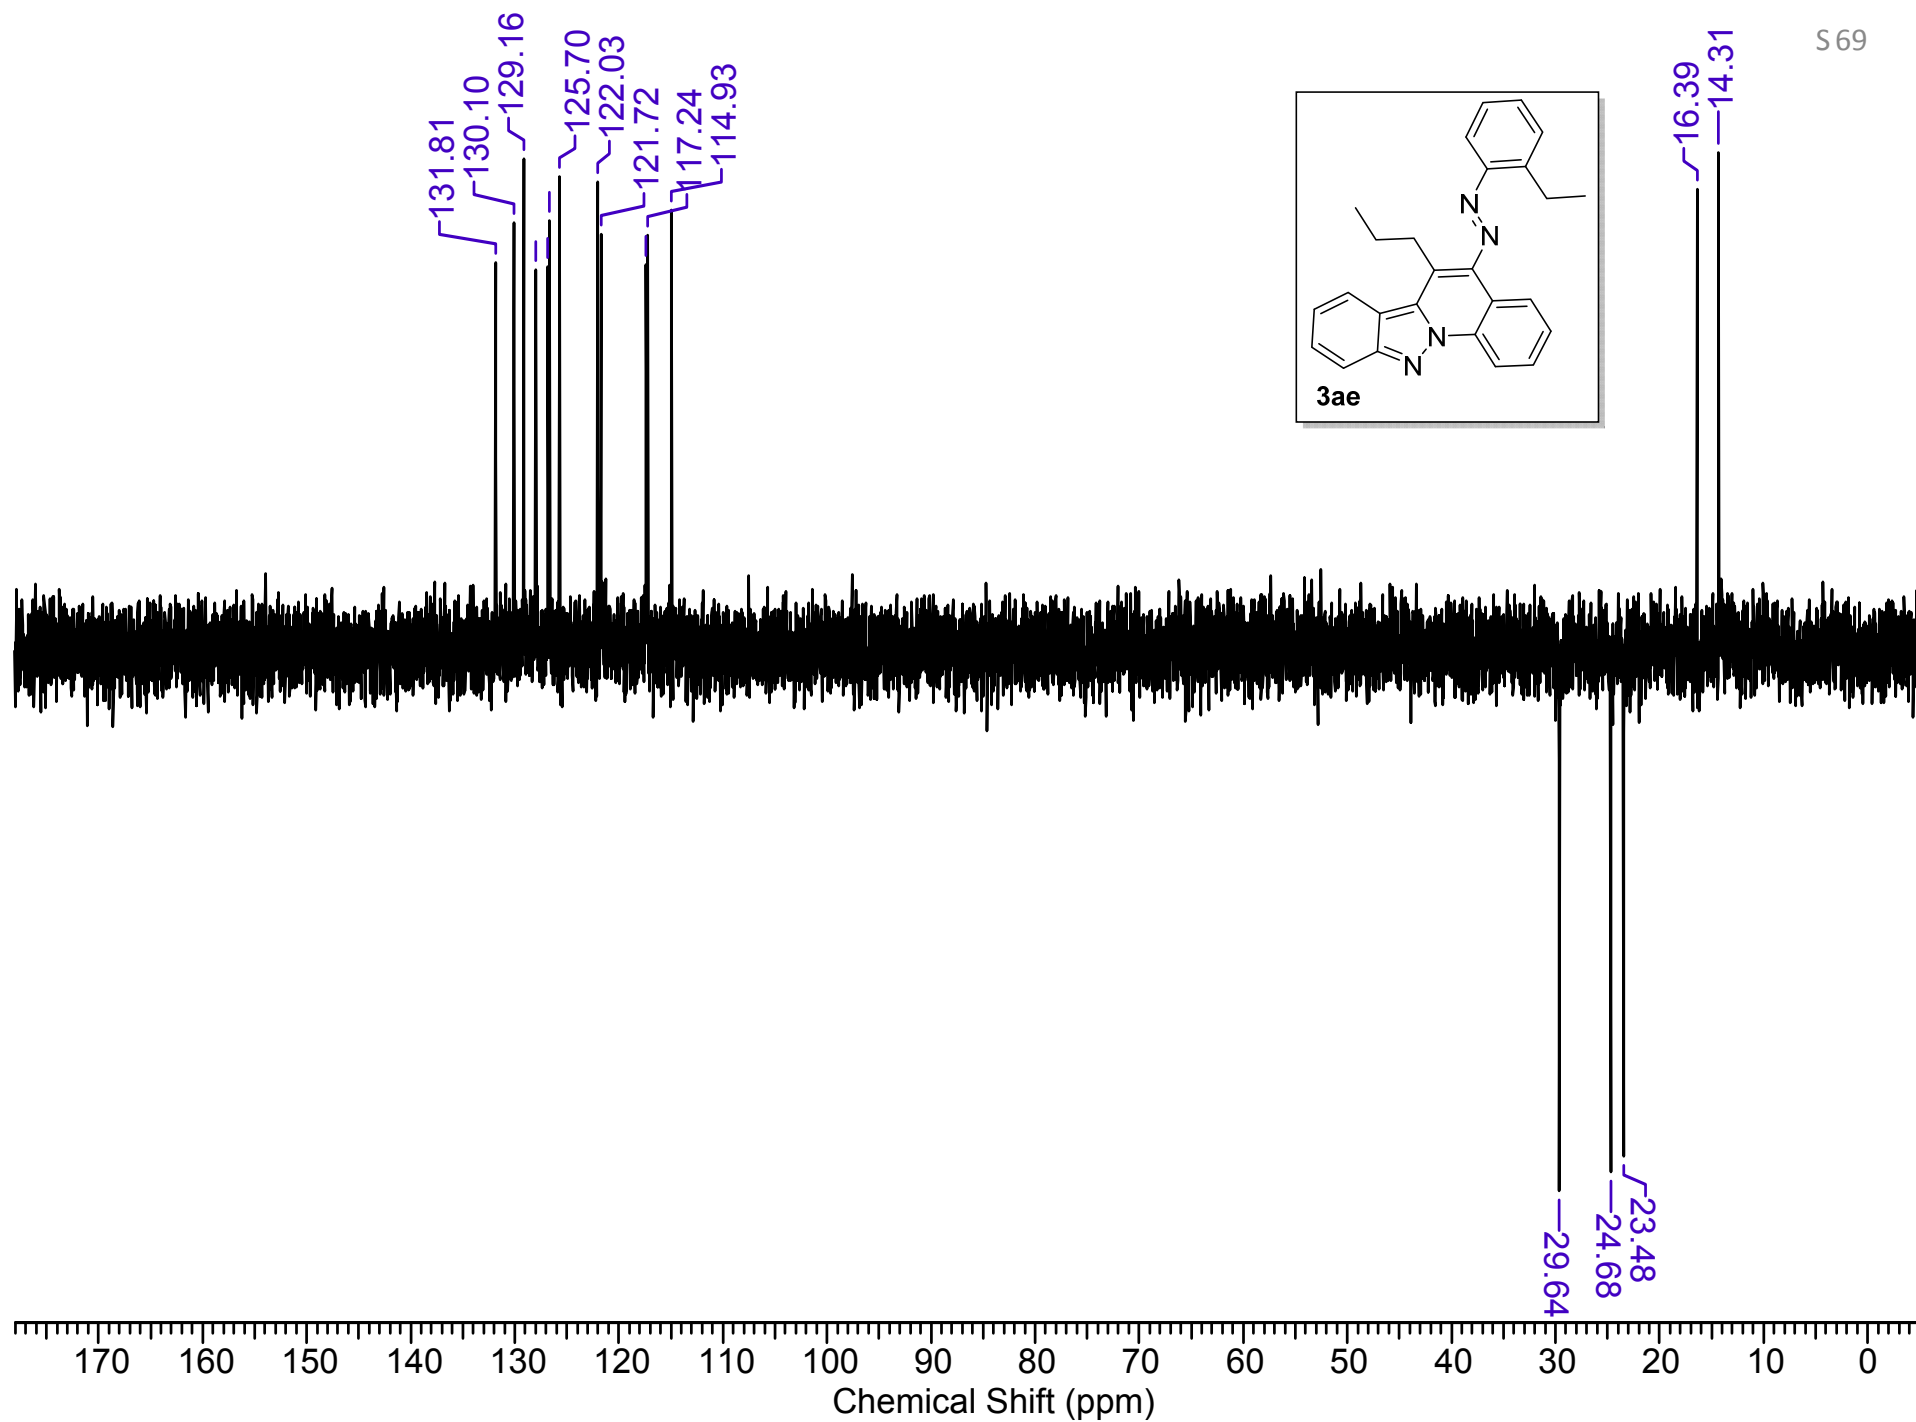

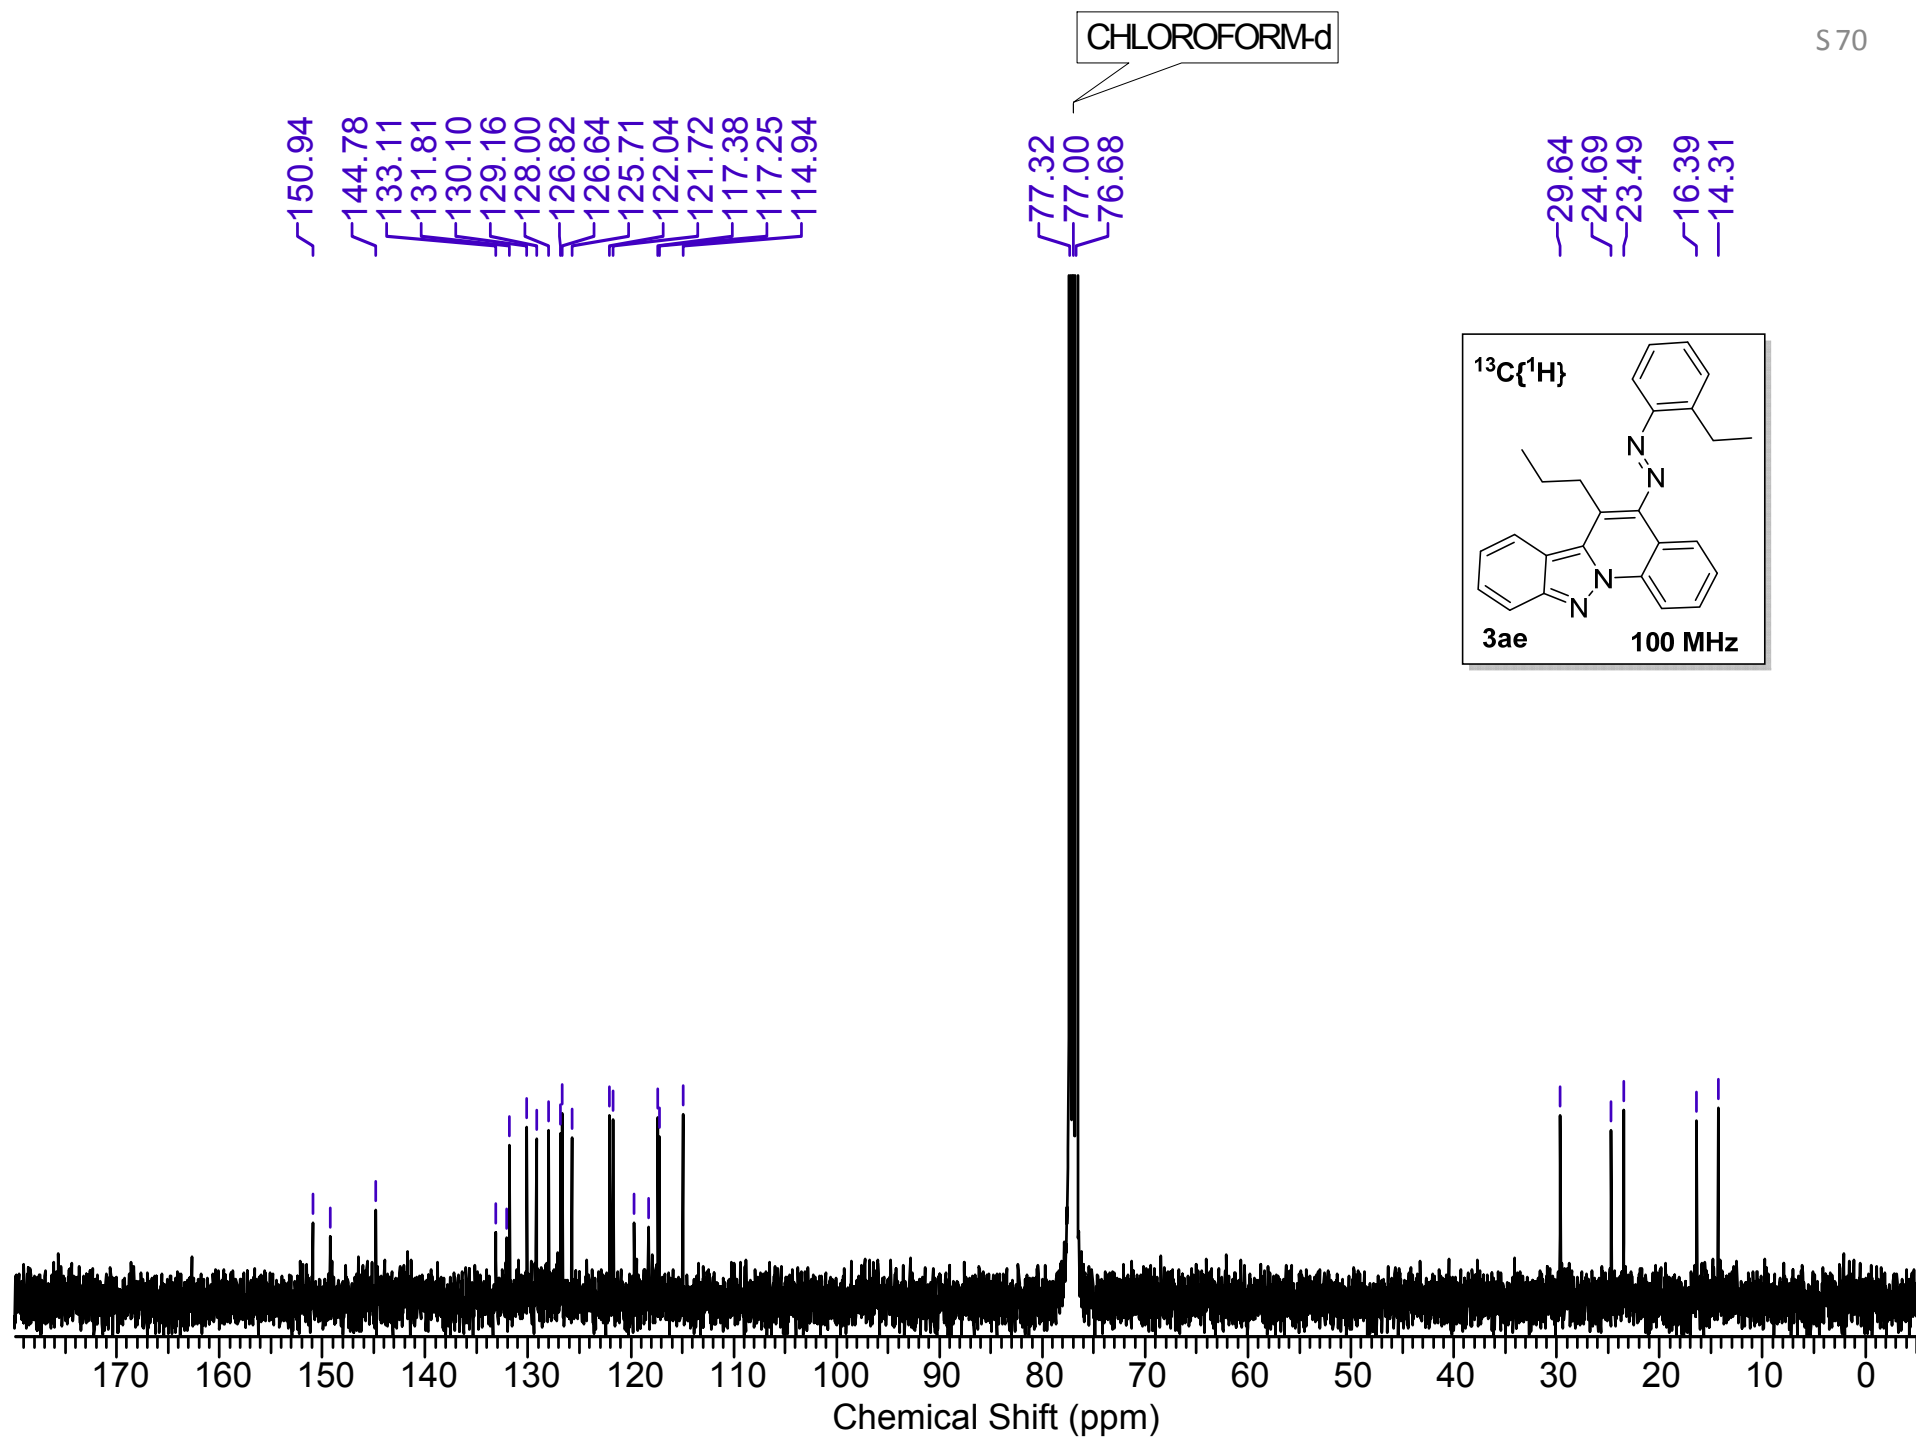

PD-708\_201231152143 #566 RT: 4.80 AV: 1 NL: 8.34E4  
T: FTMS + p ESI Full ms [100.0000-1500.0000]

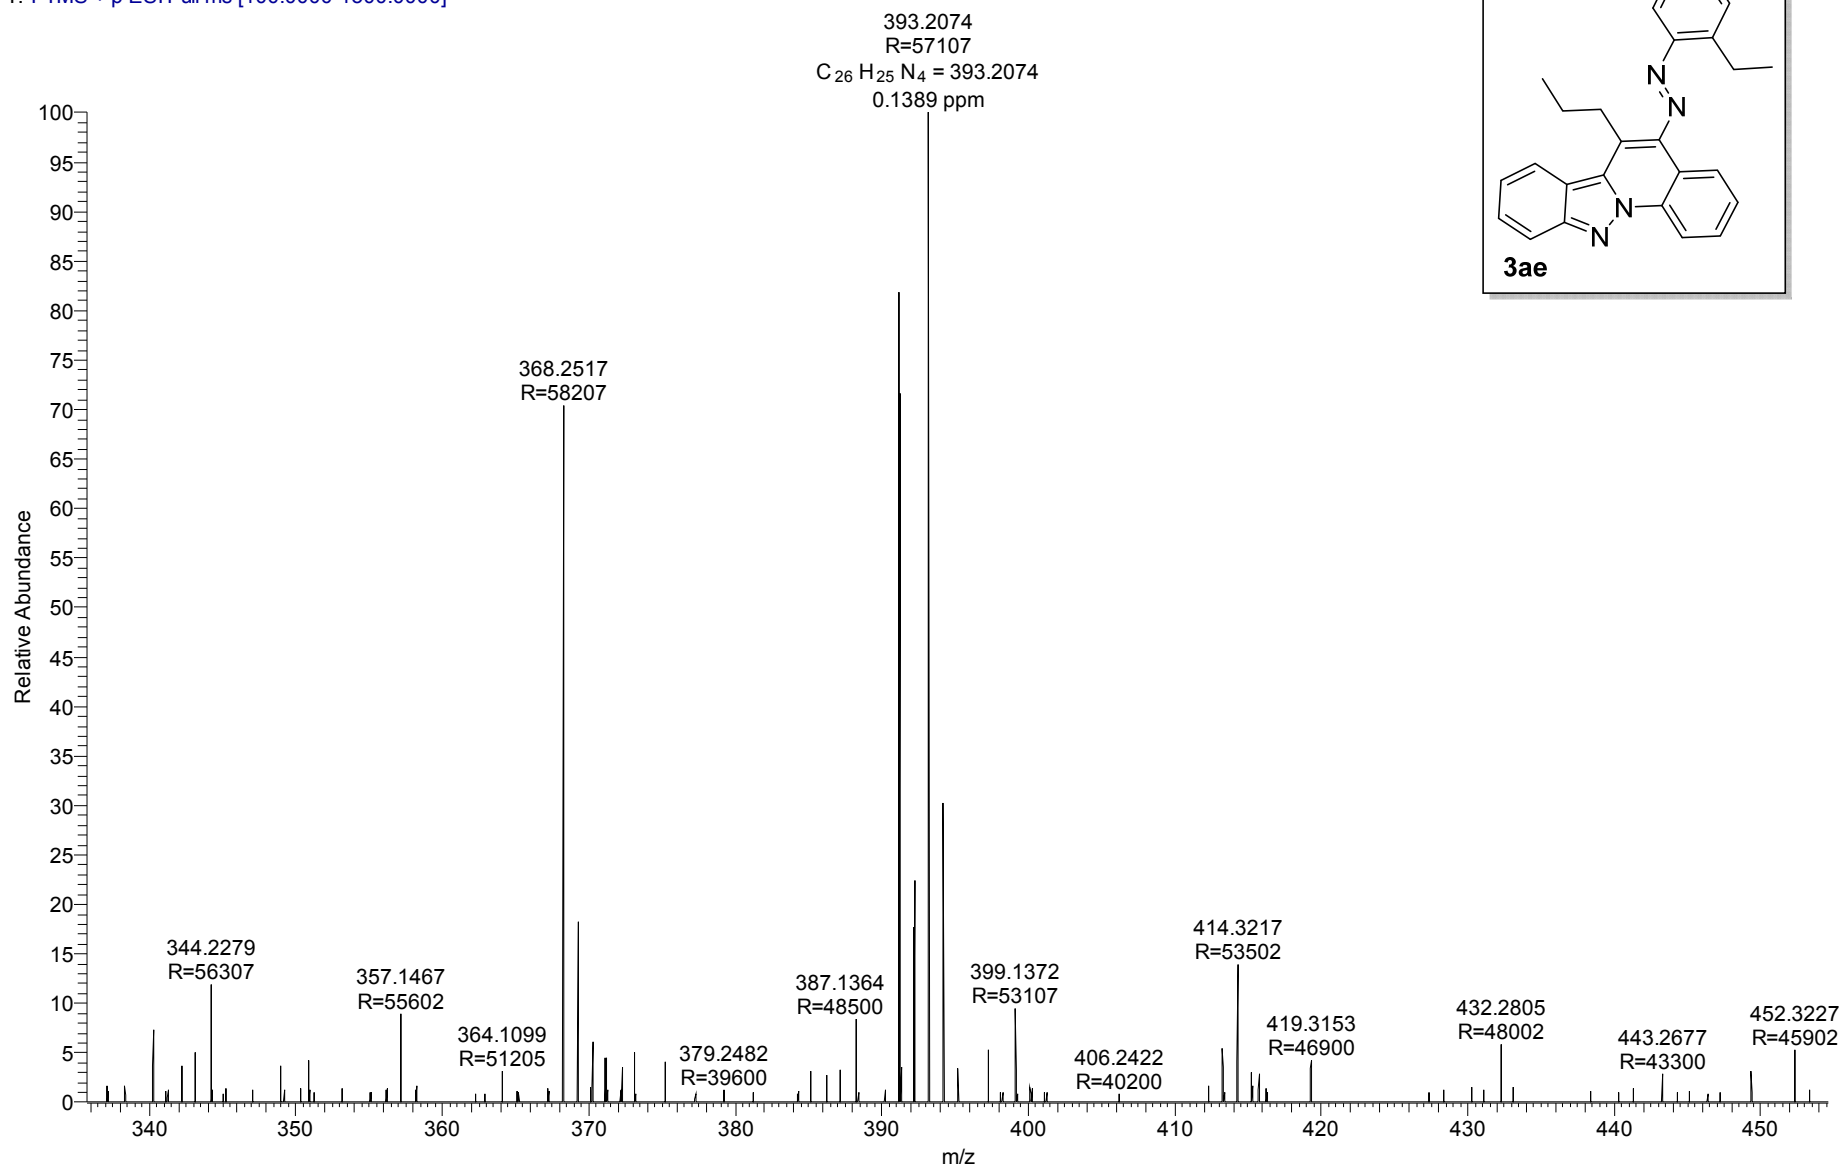

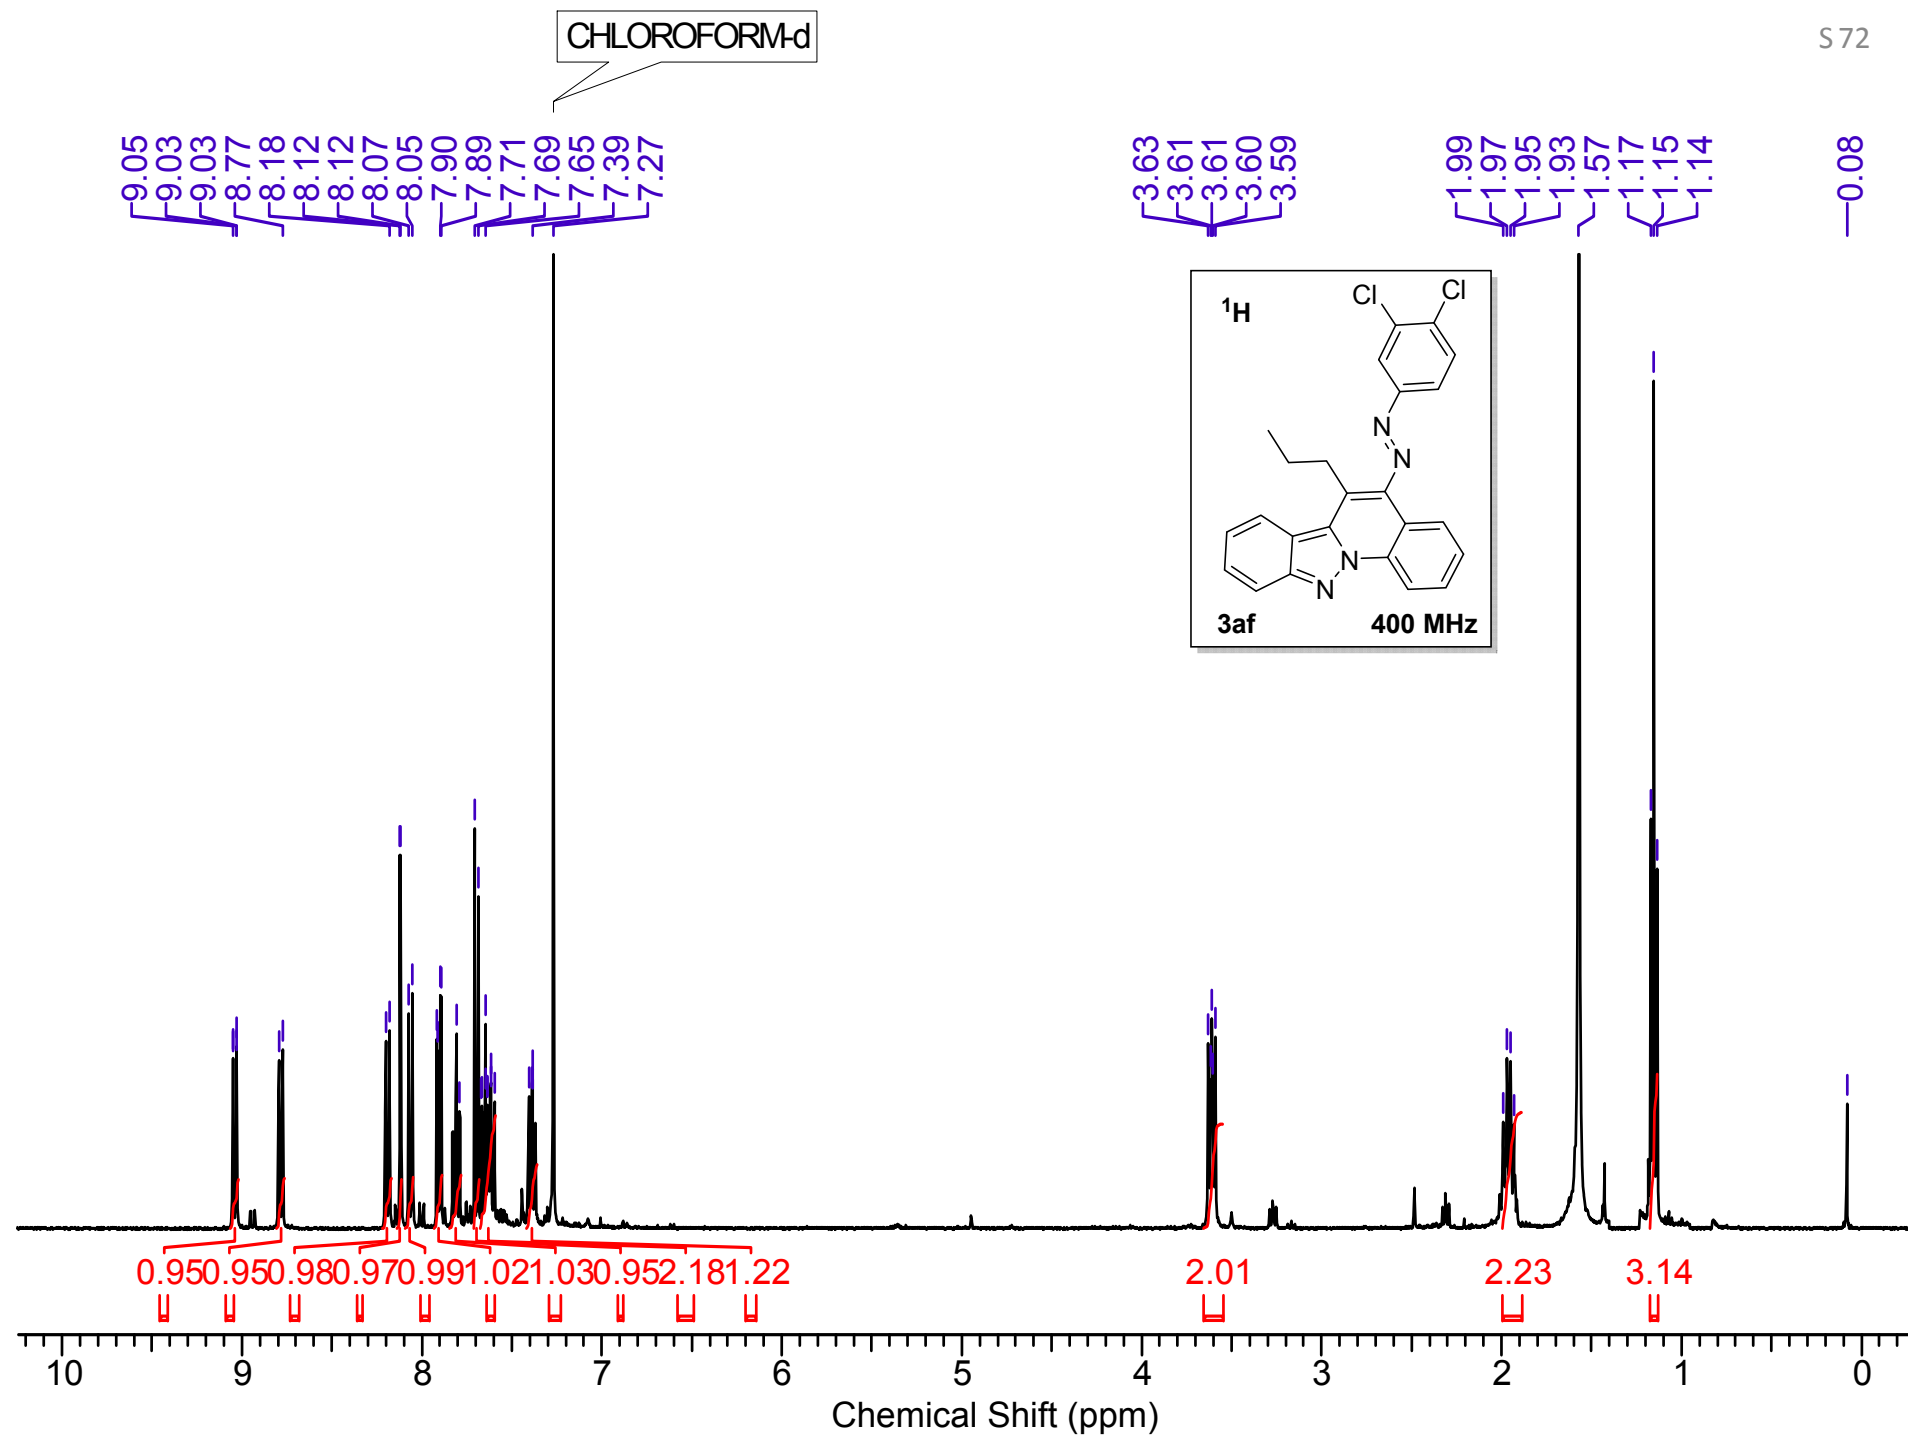



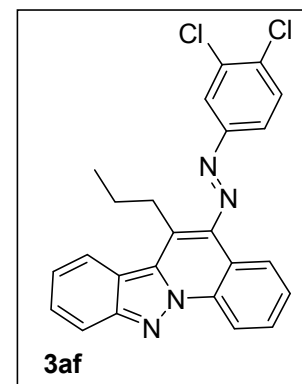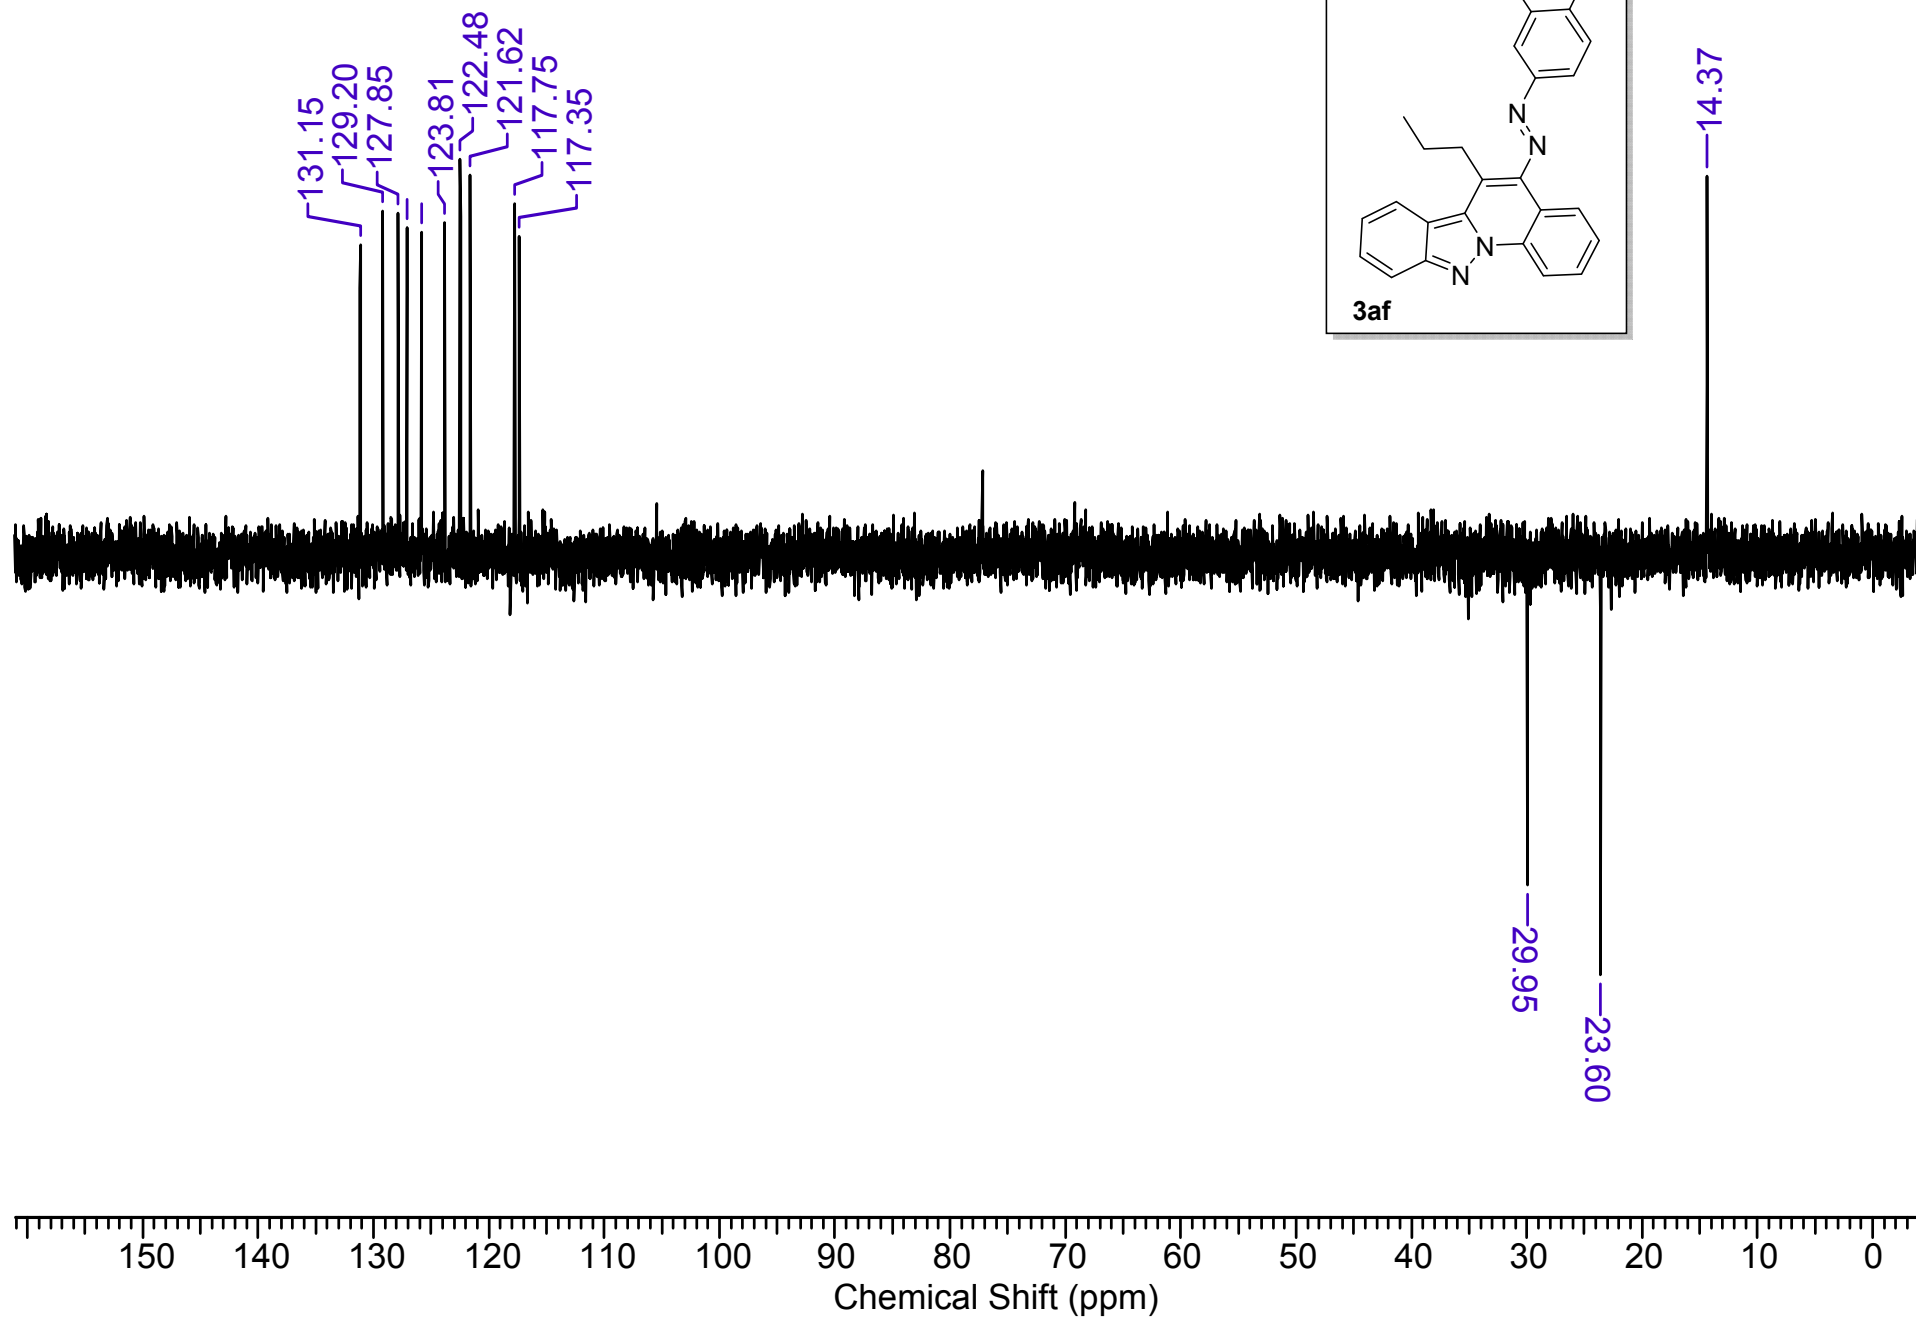

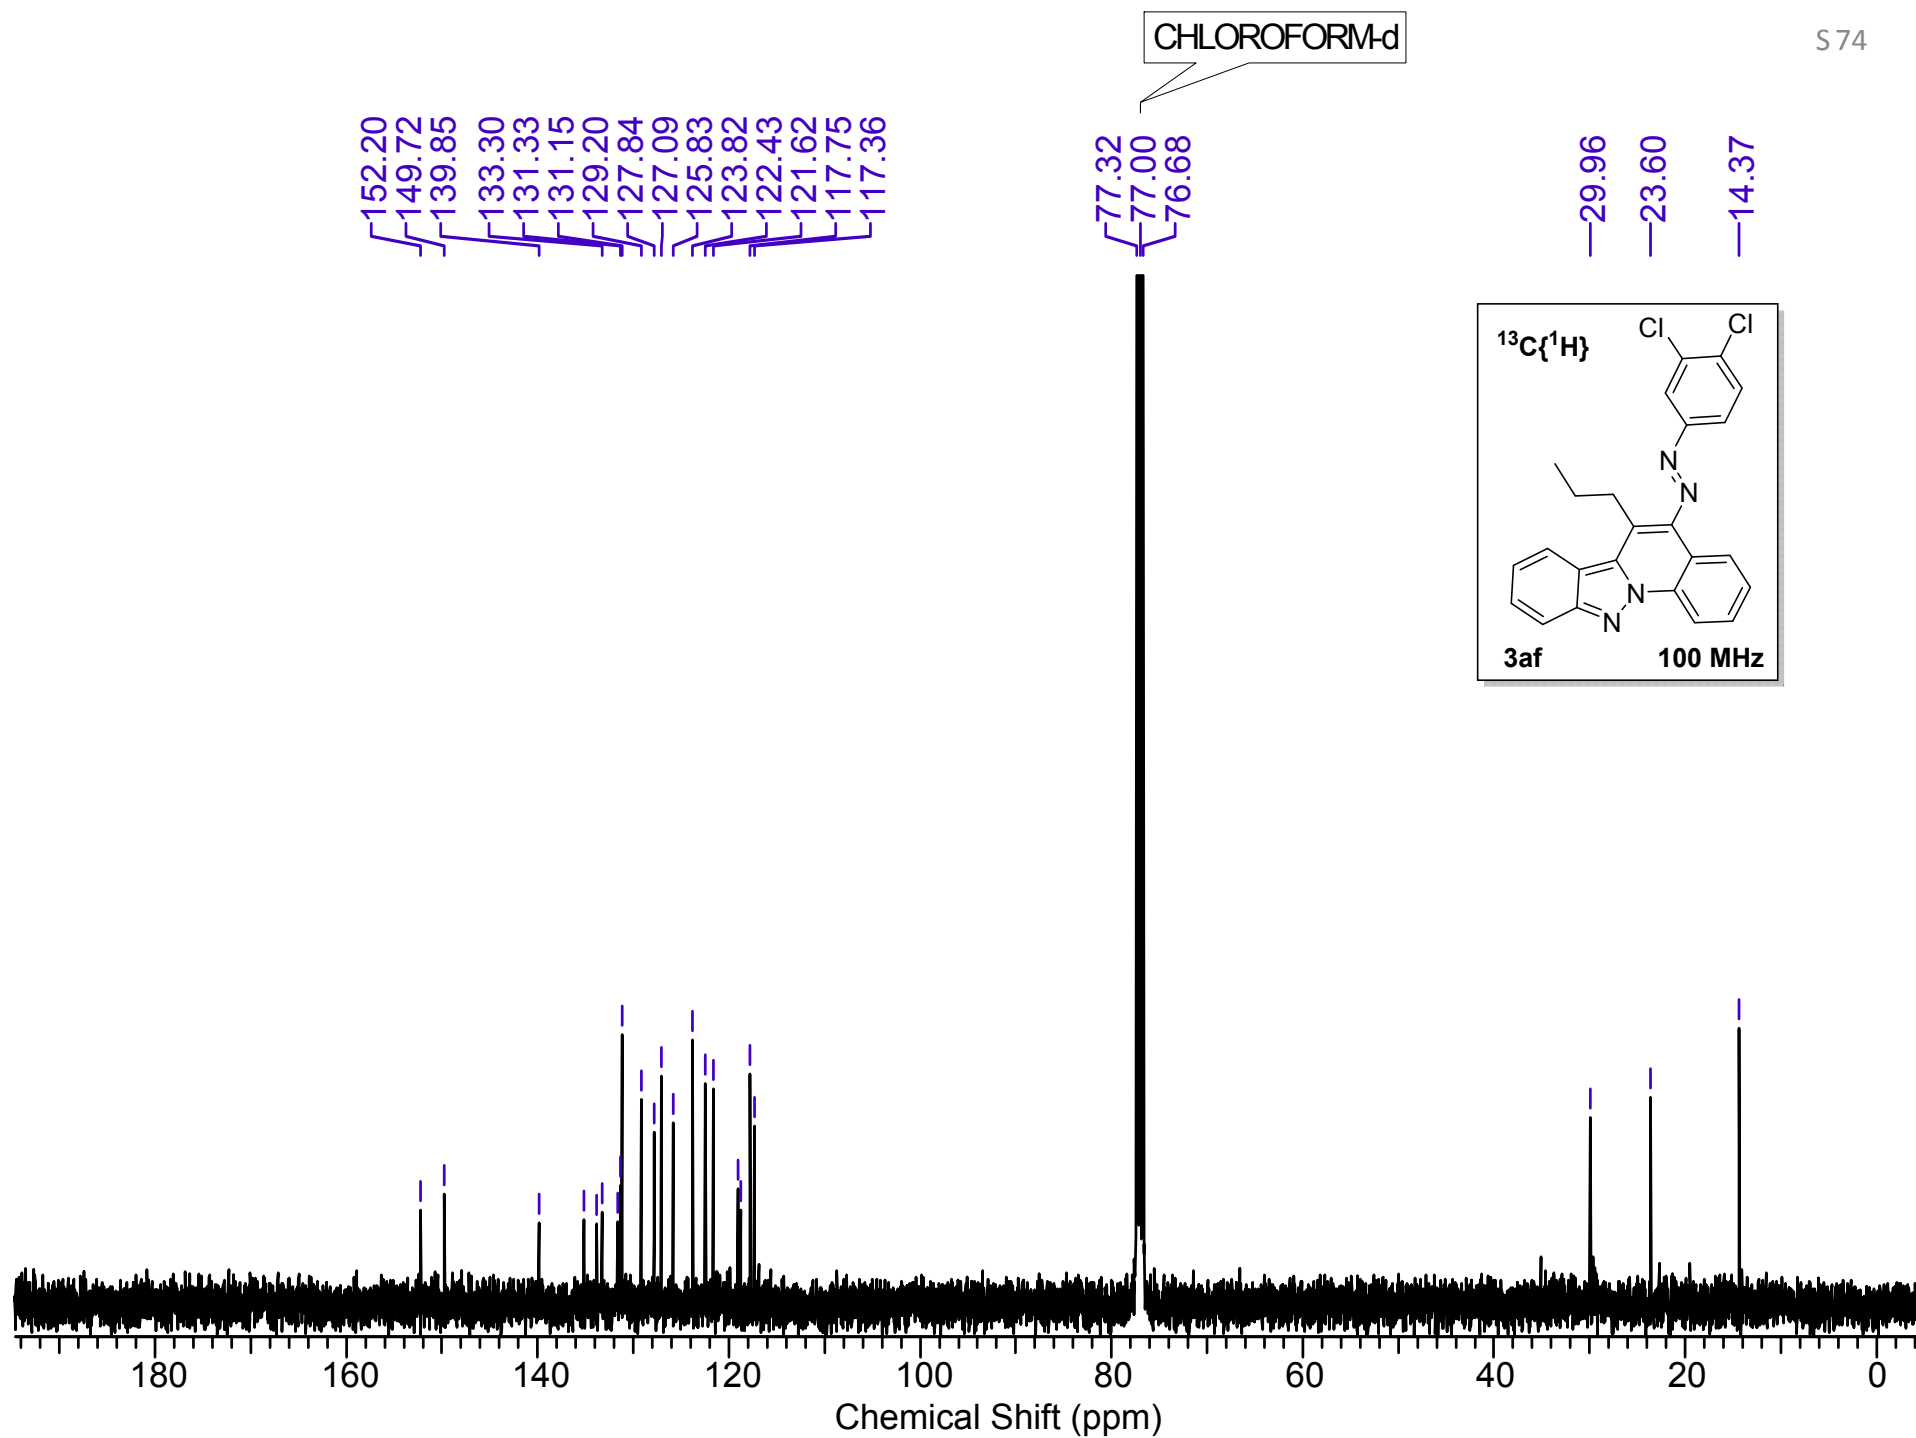

PD-711 #592 RT: 4.89 AV: 1 NL: 4.89E5  
T: FTMS + p ESI Full ms [100.0000-1500.0000]

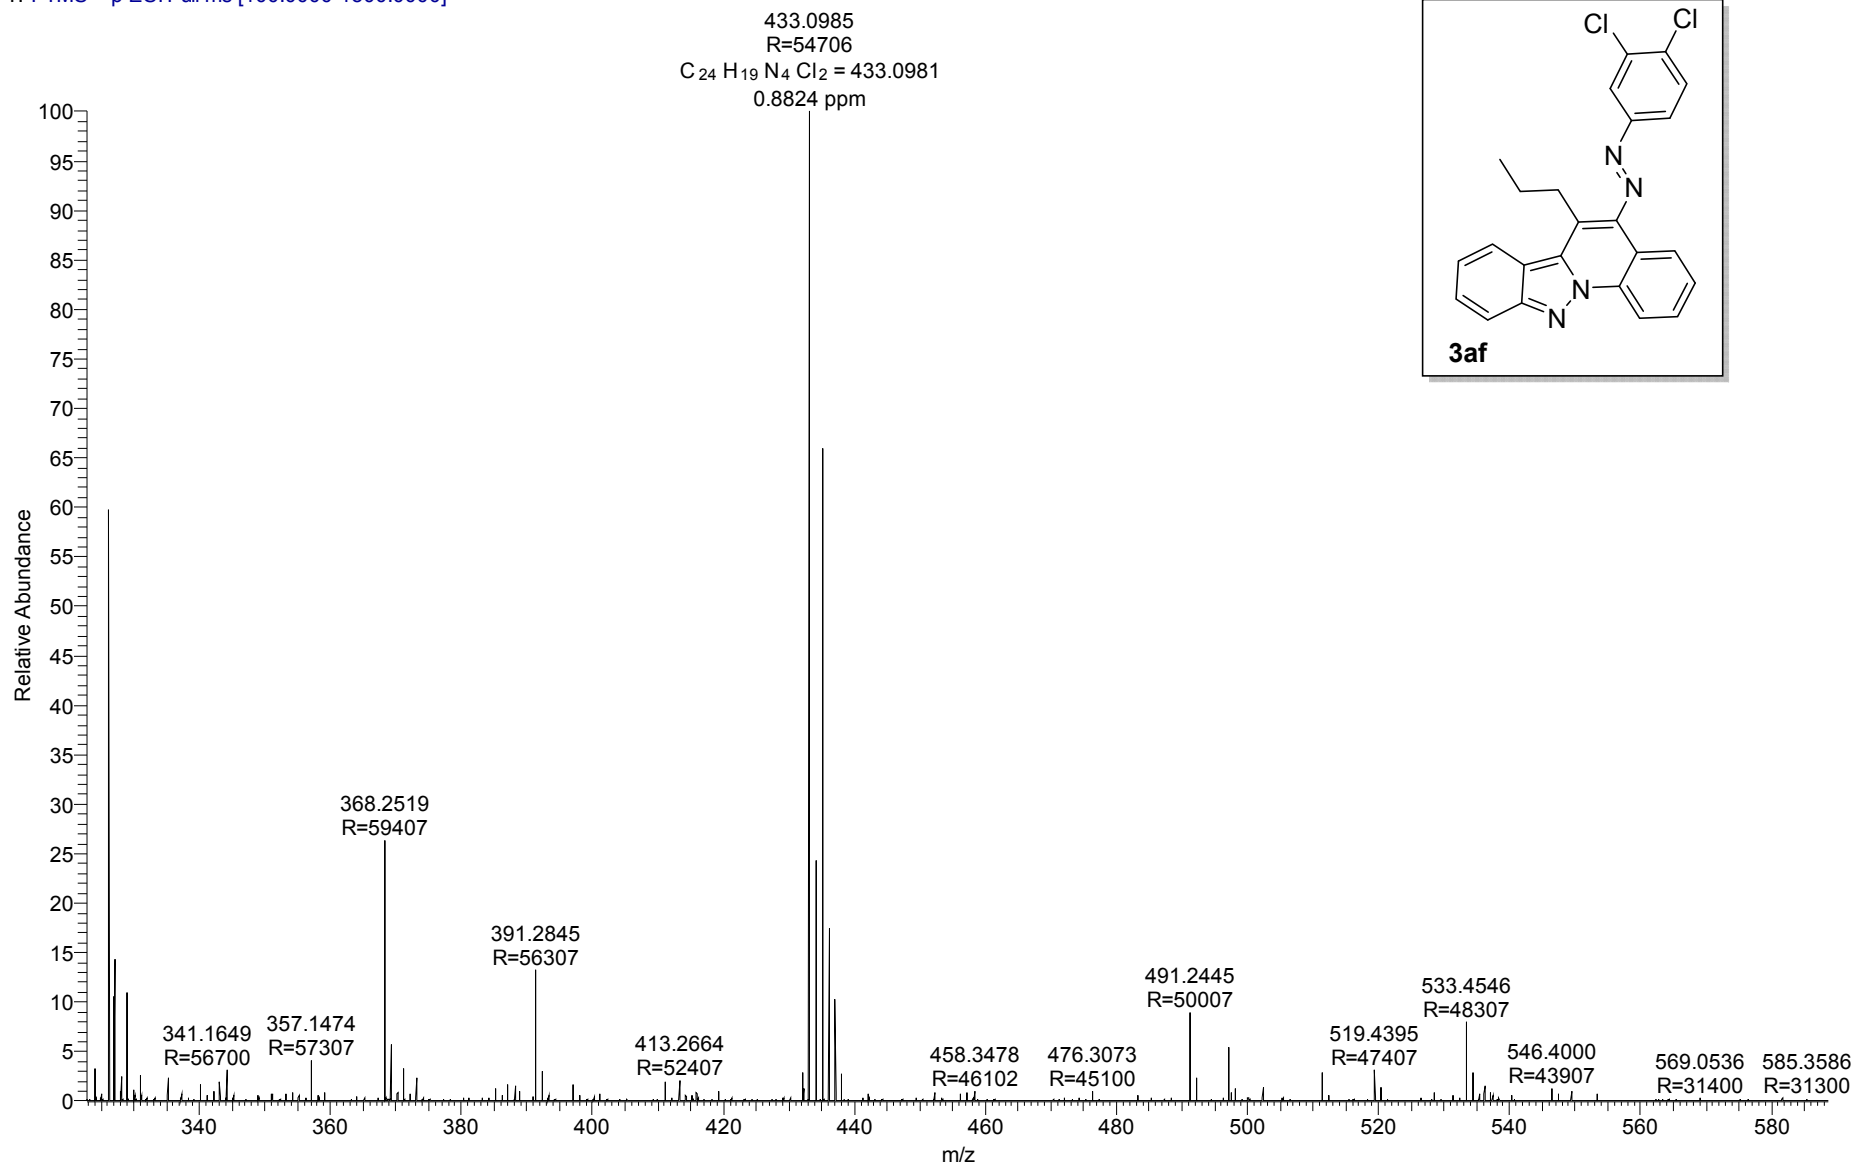

CHLOROFORM-d

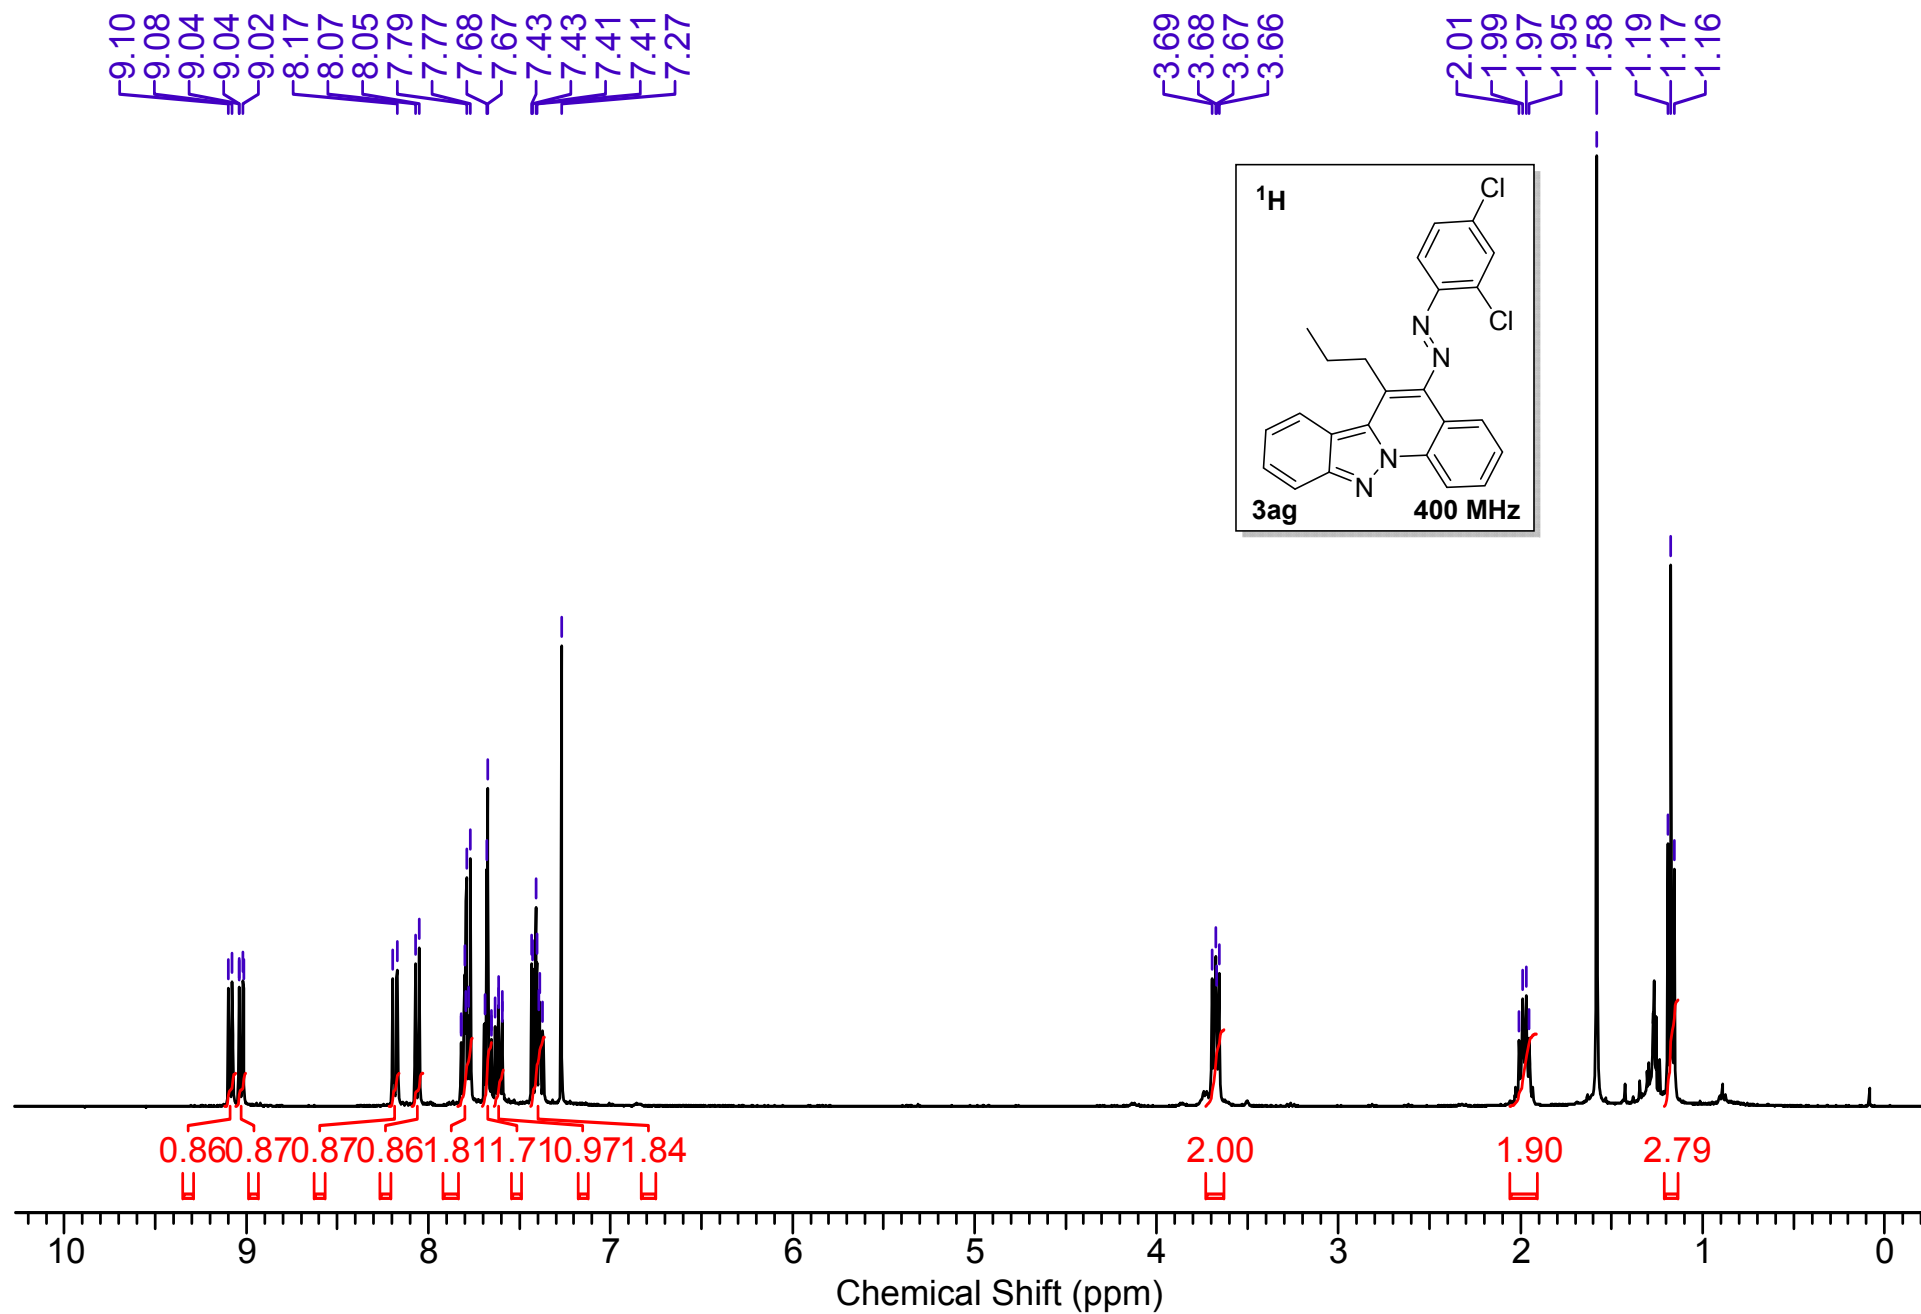

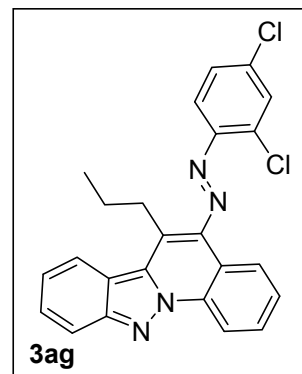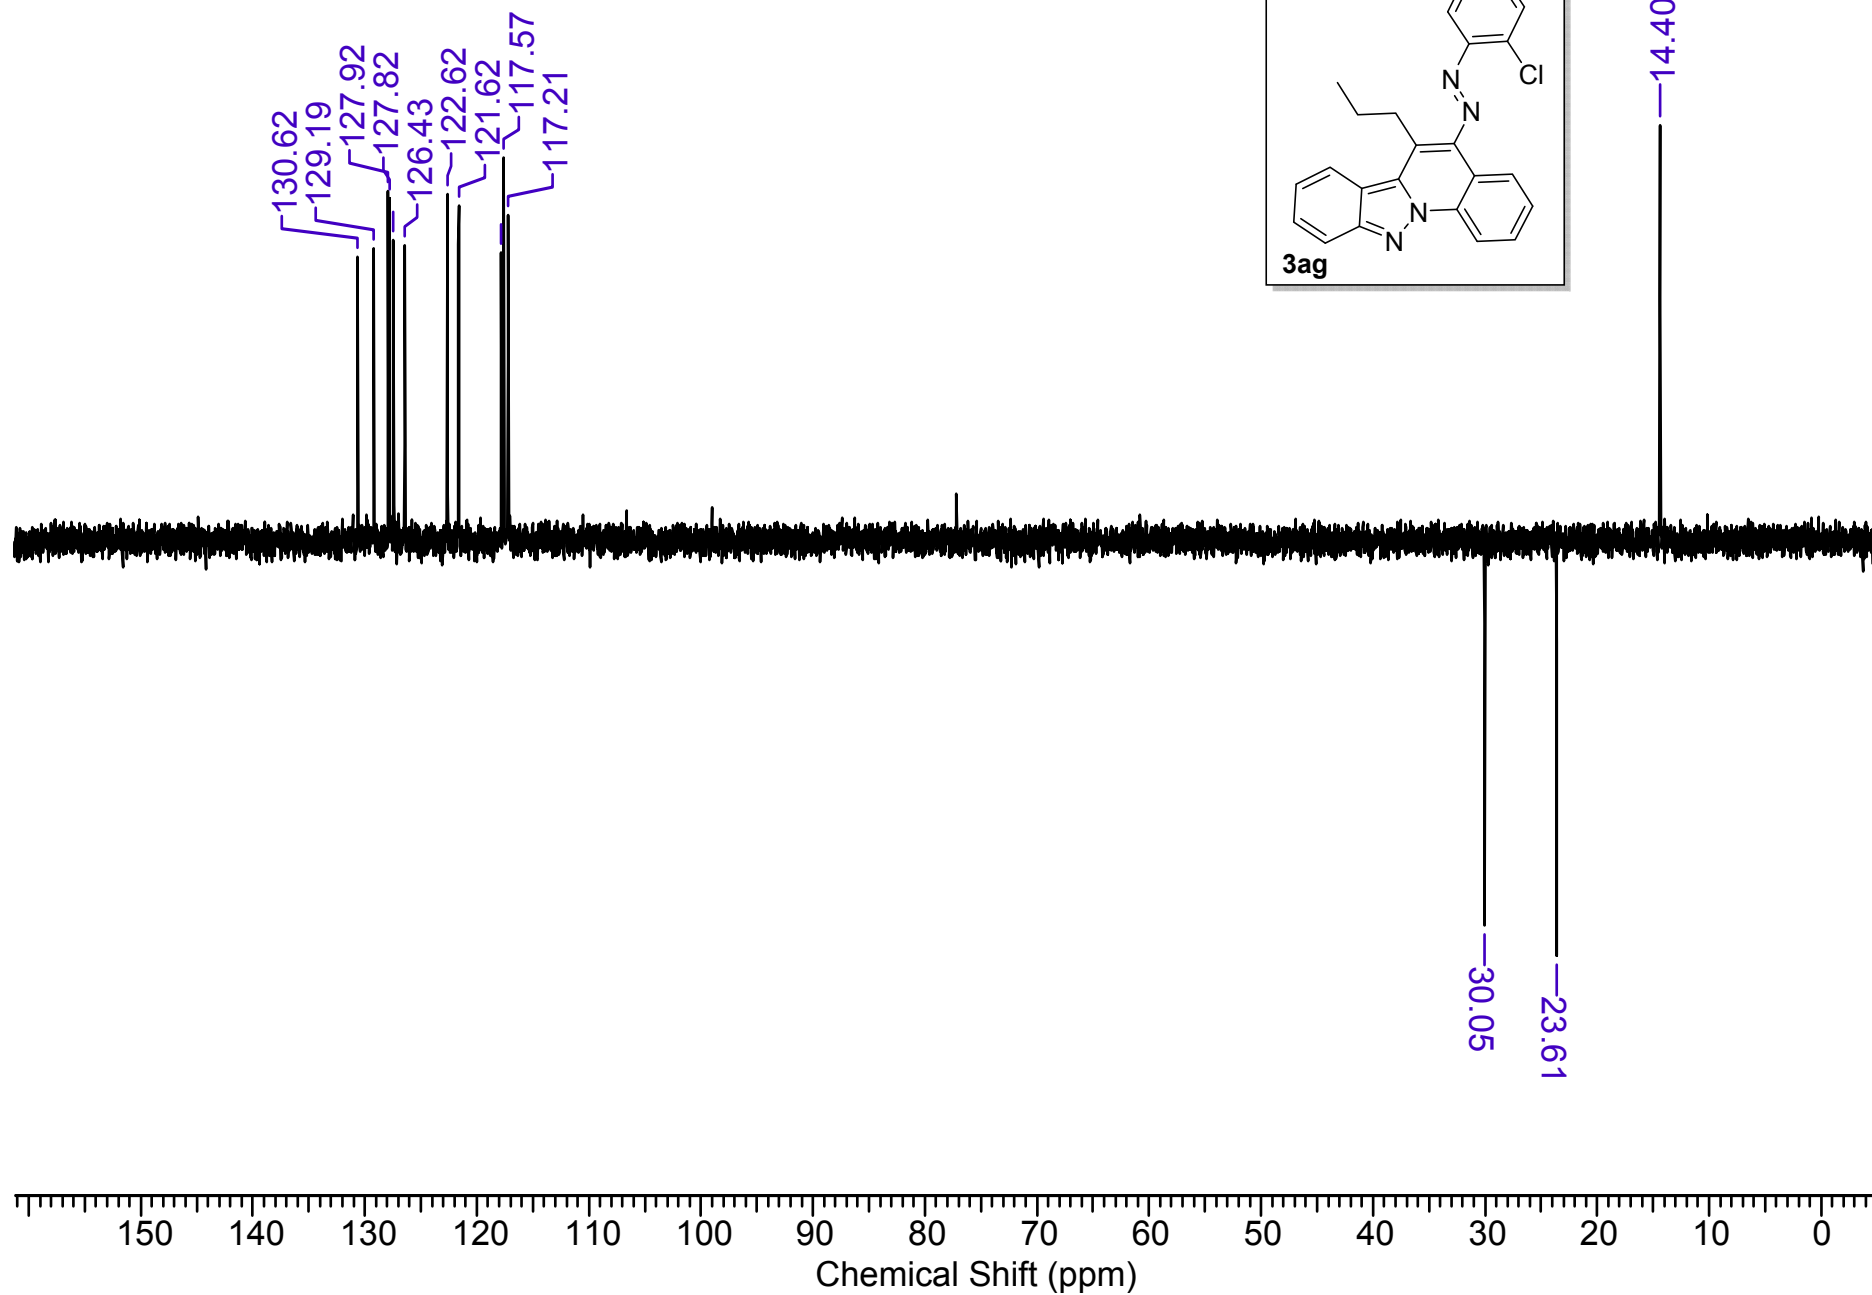

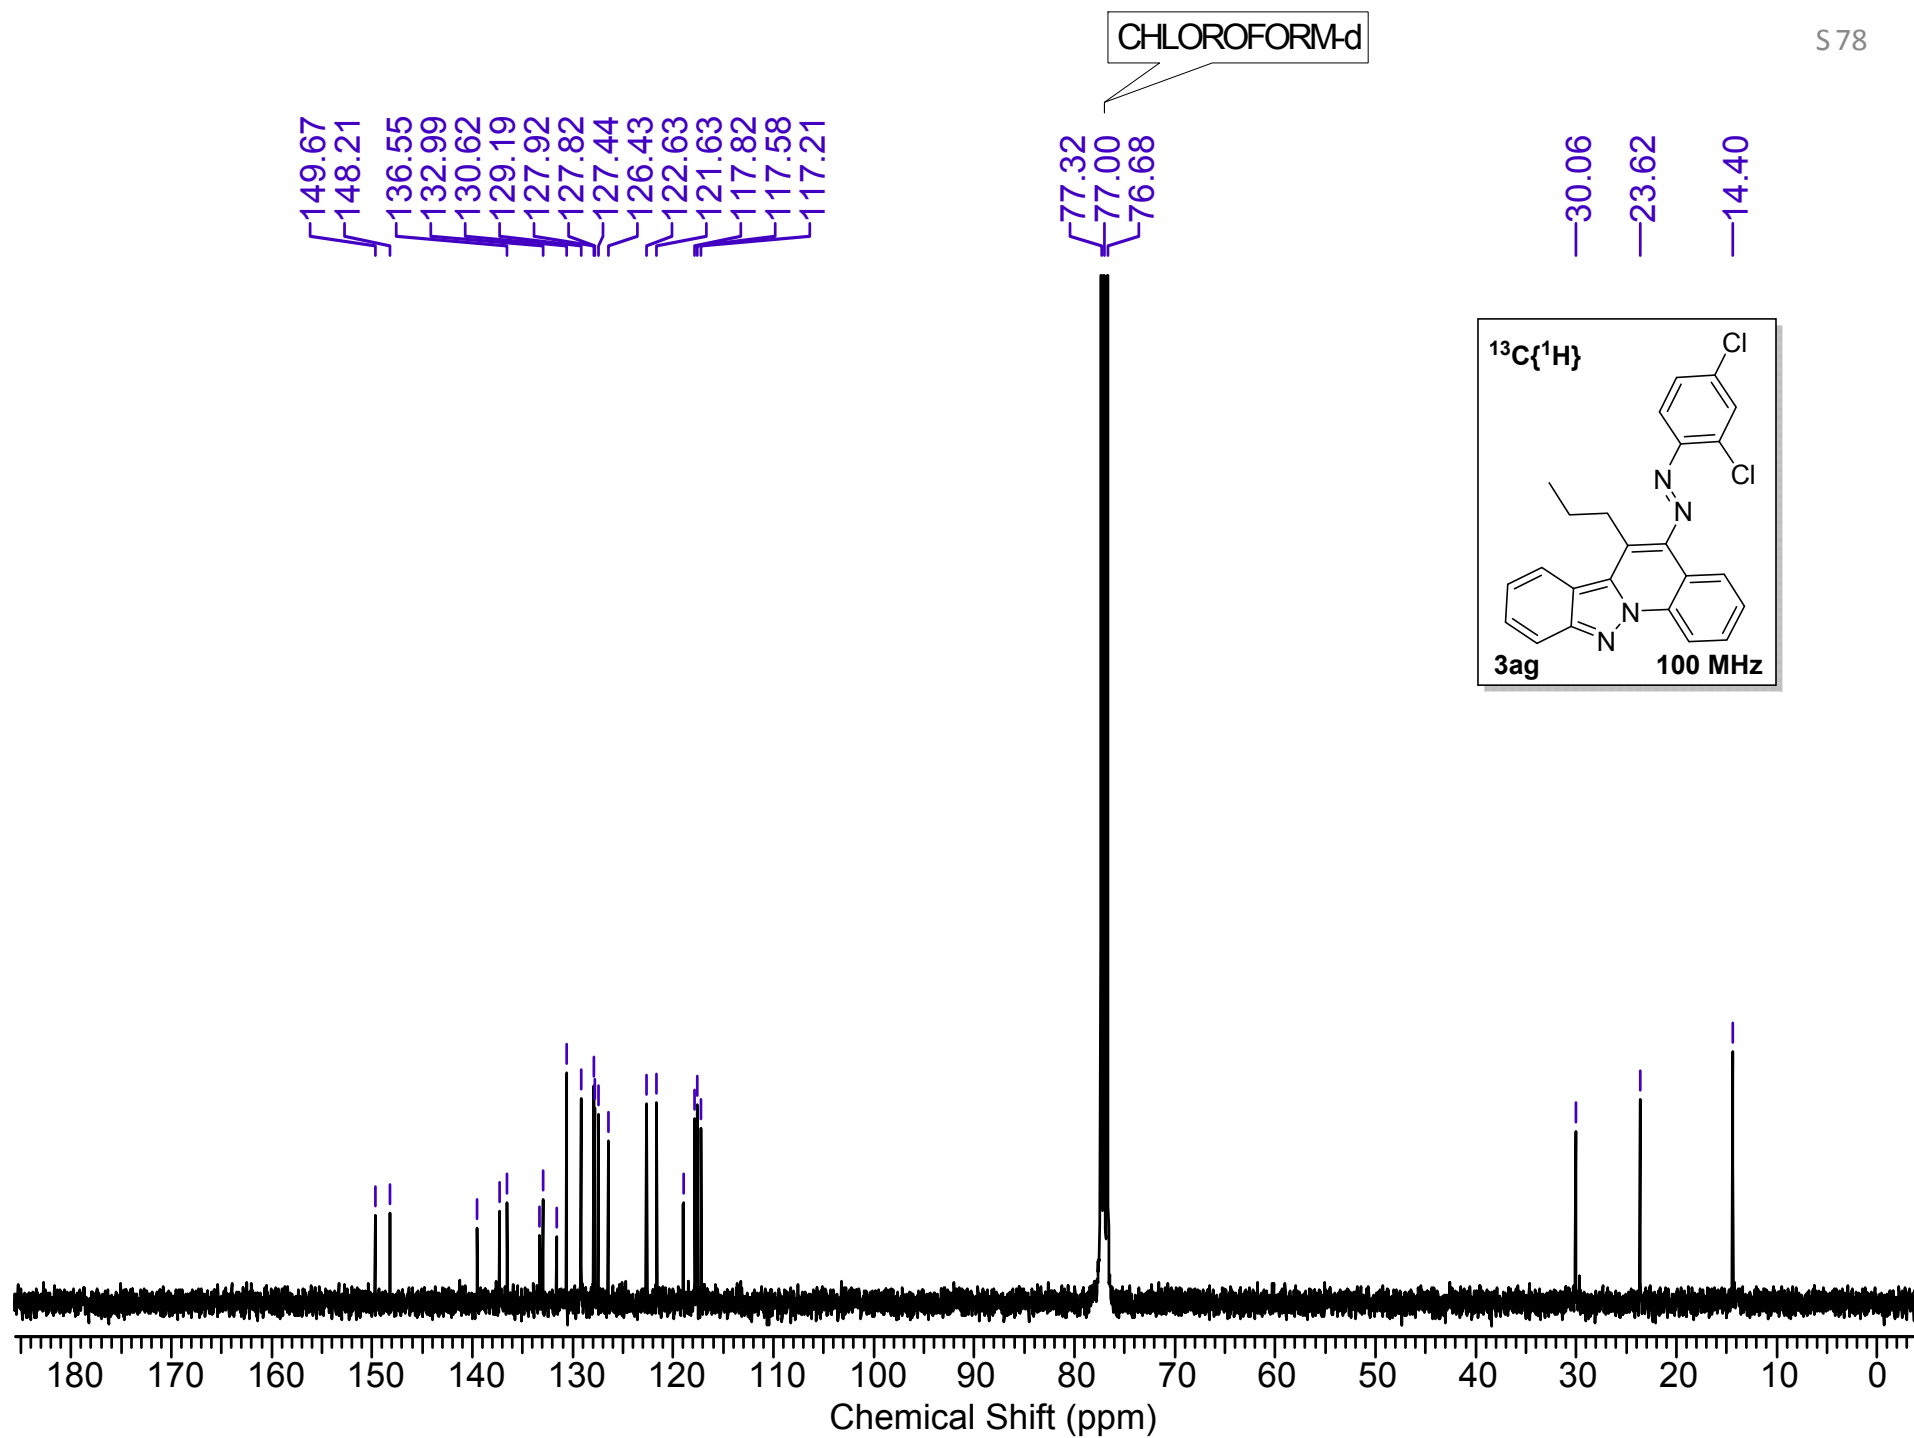

PD-720 #577 RT: 4.86 AV: 1 NL: 4.21E5  
T: FTMS + p ESI Full ms [100.0000-1500.0000]

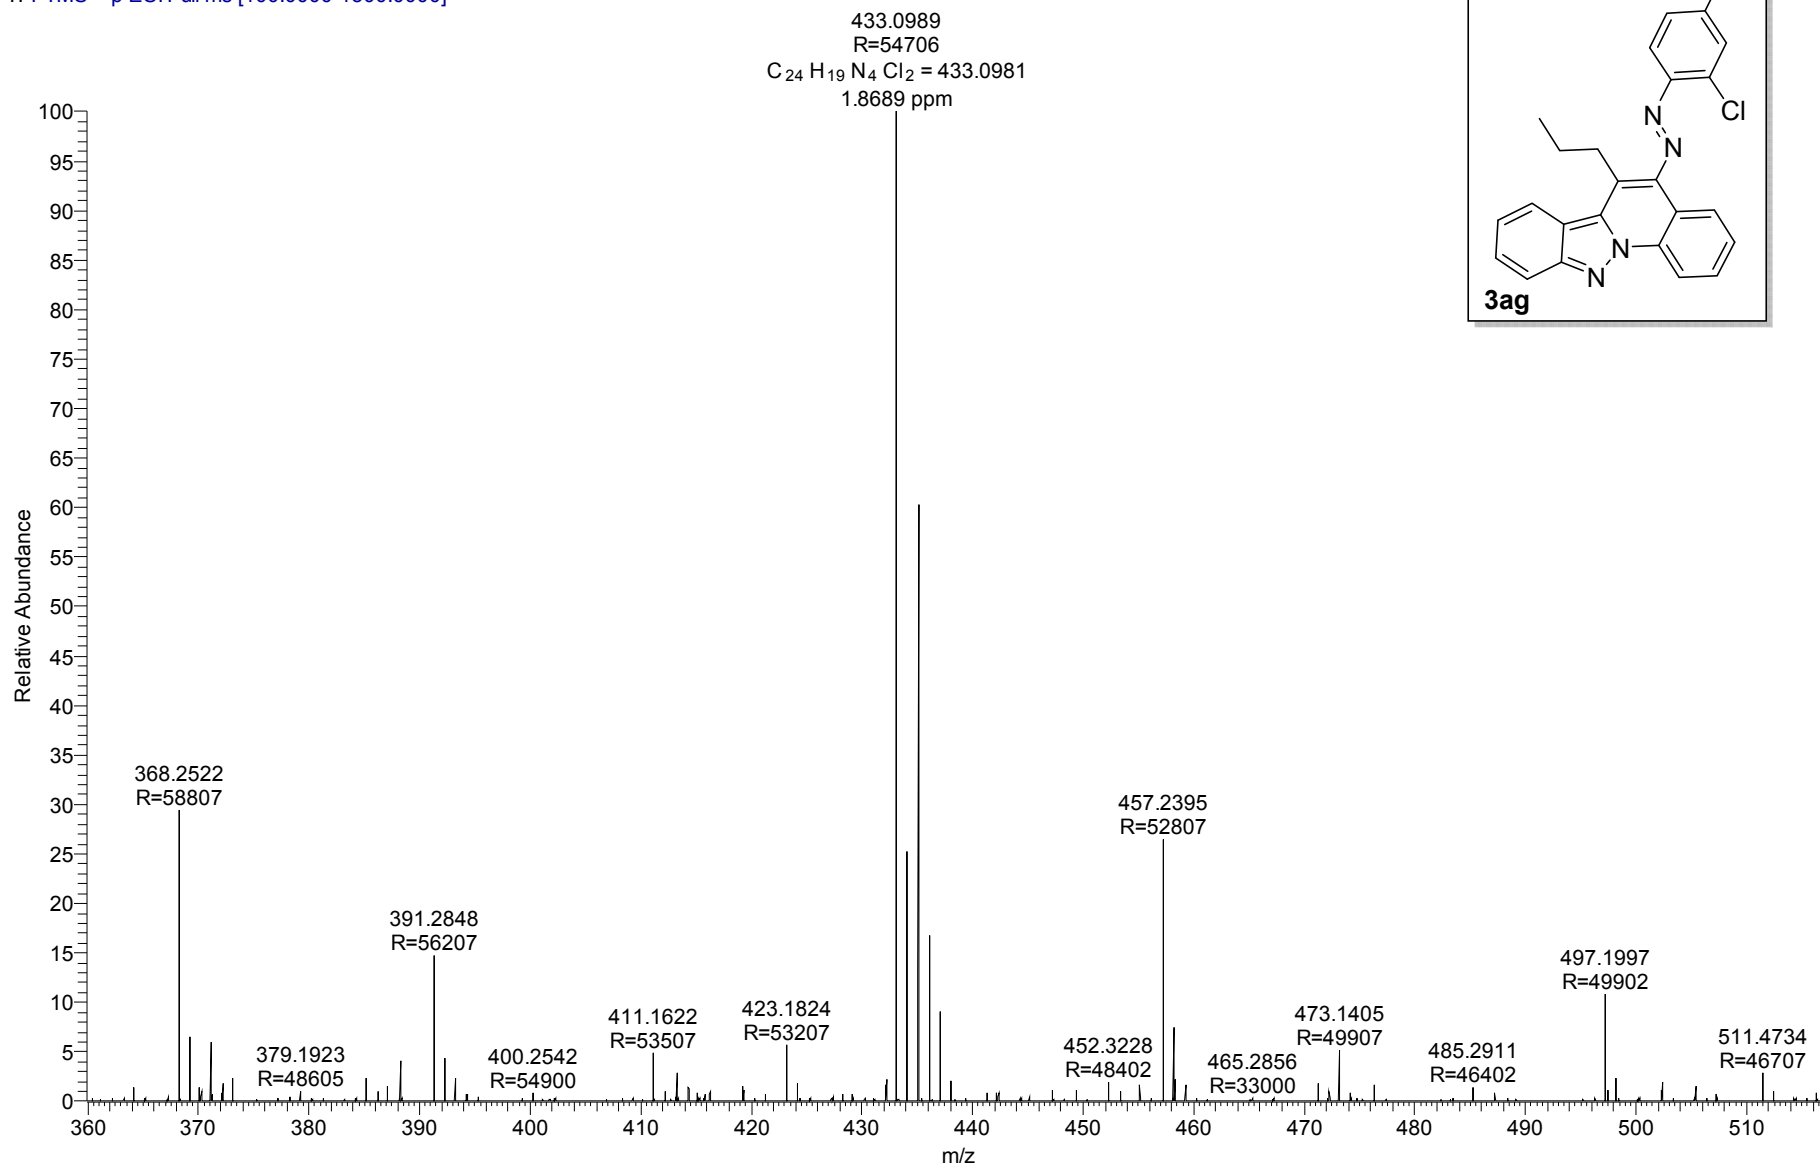

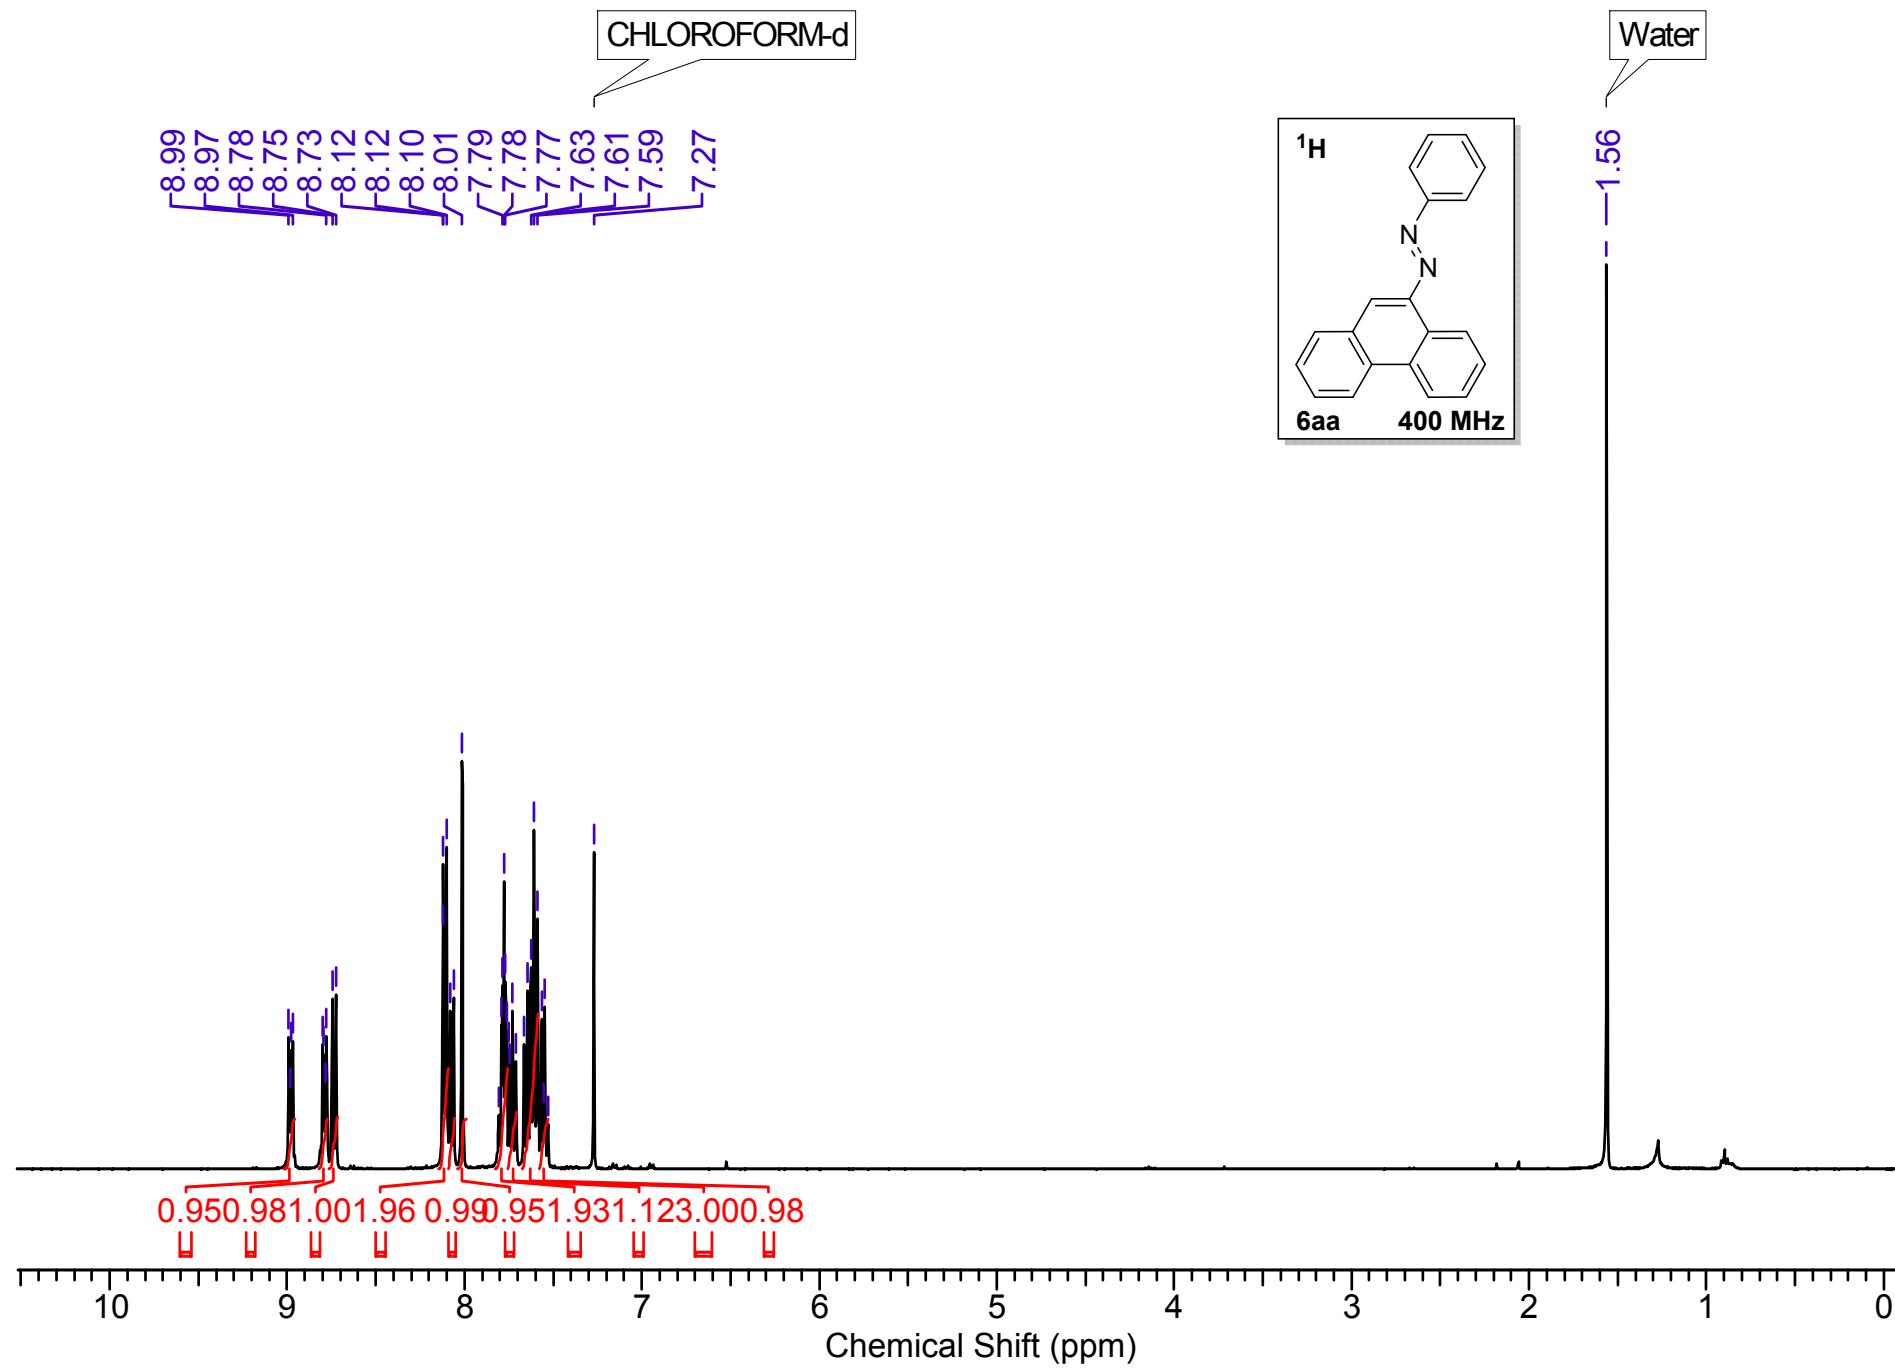



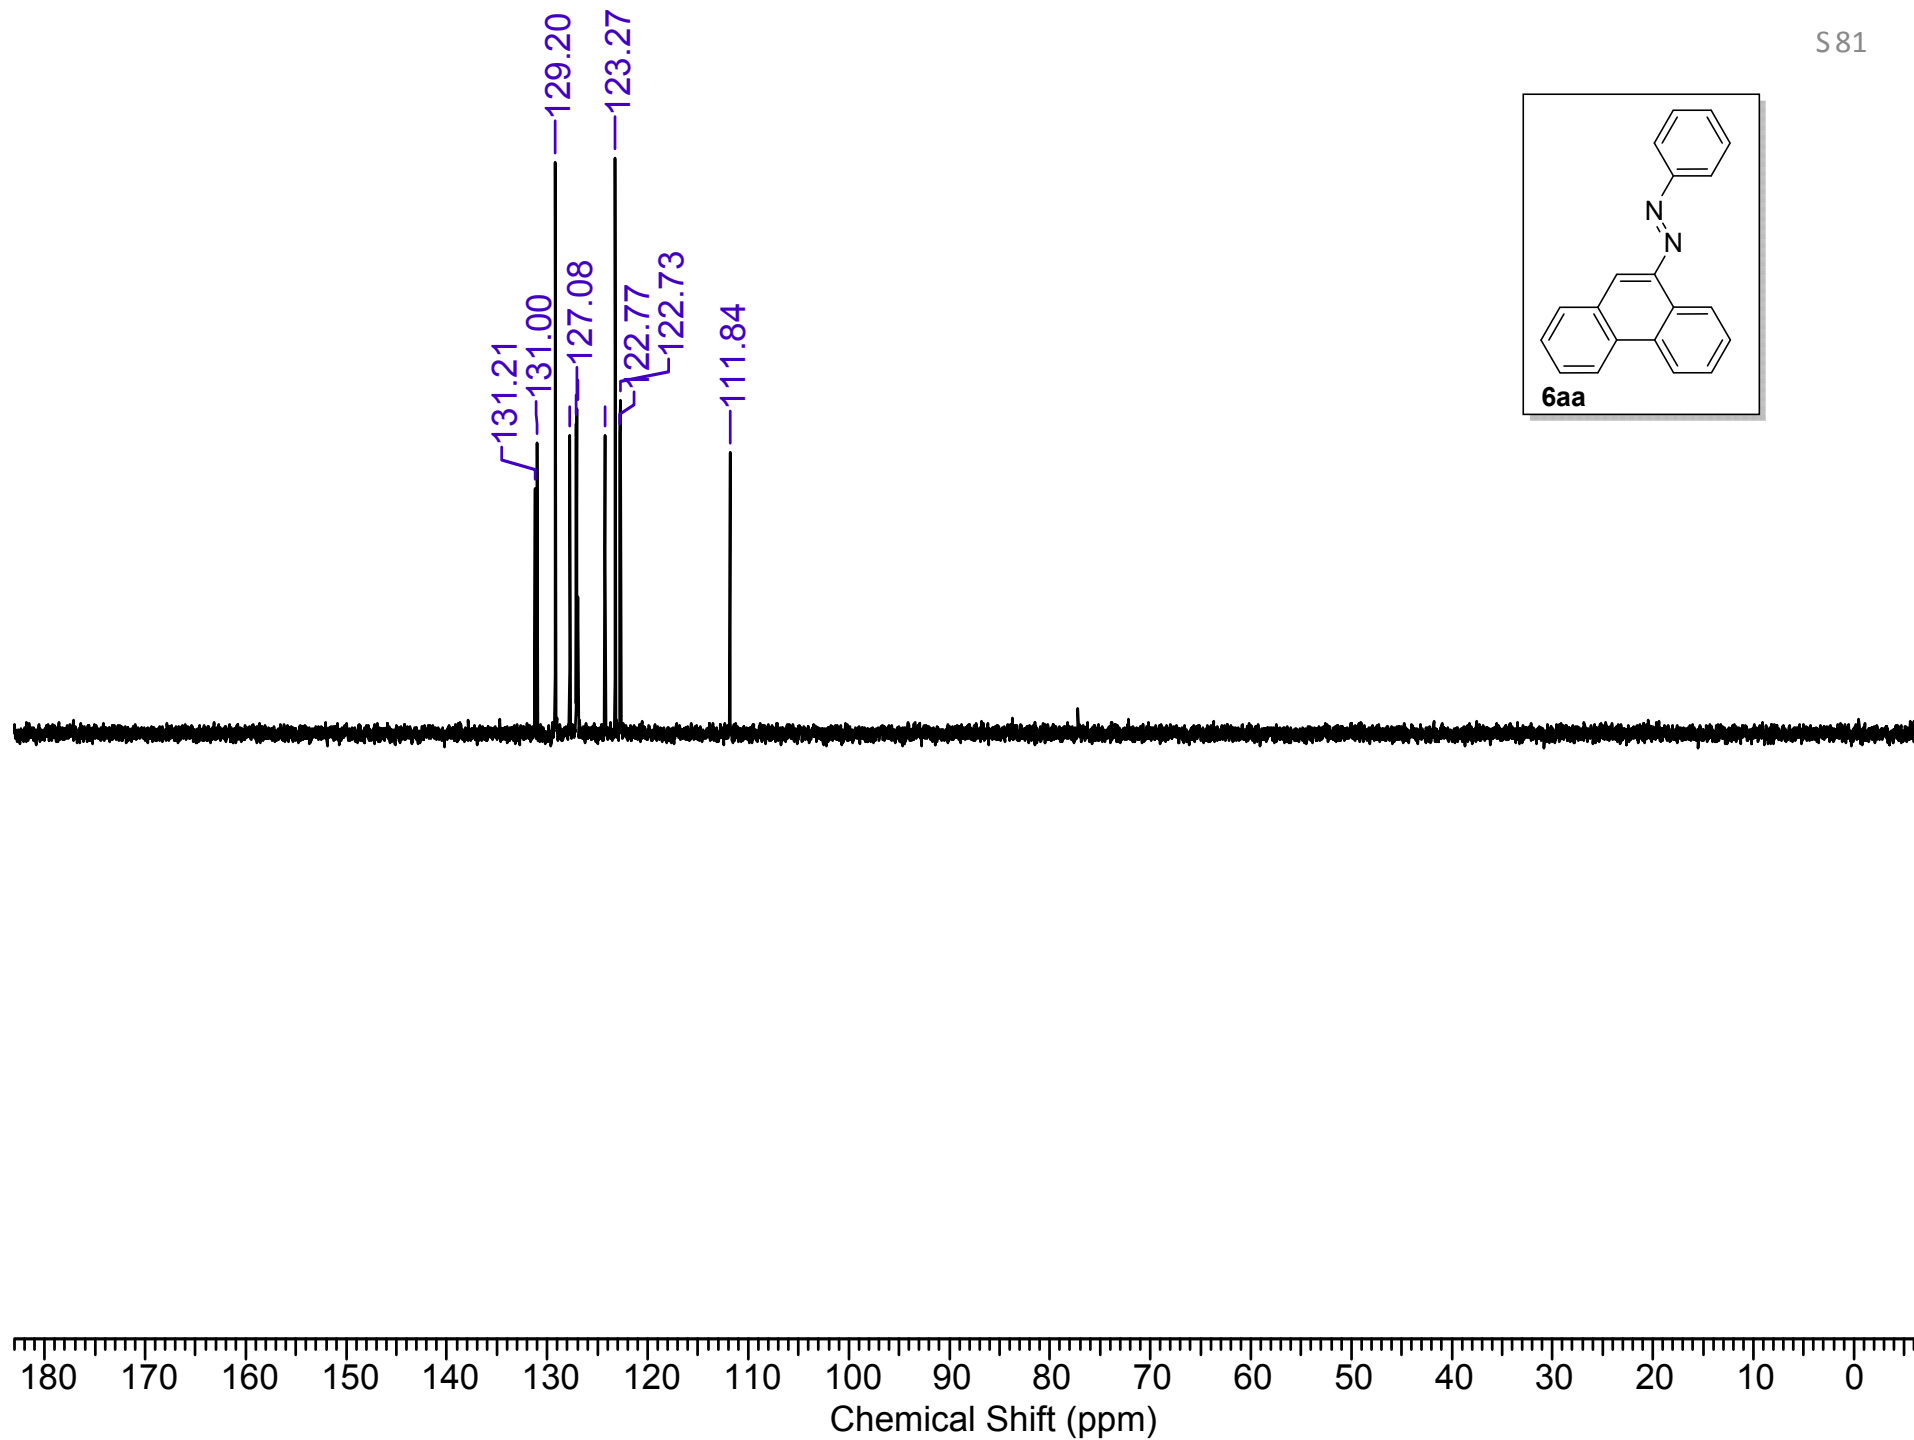

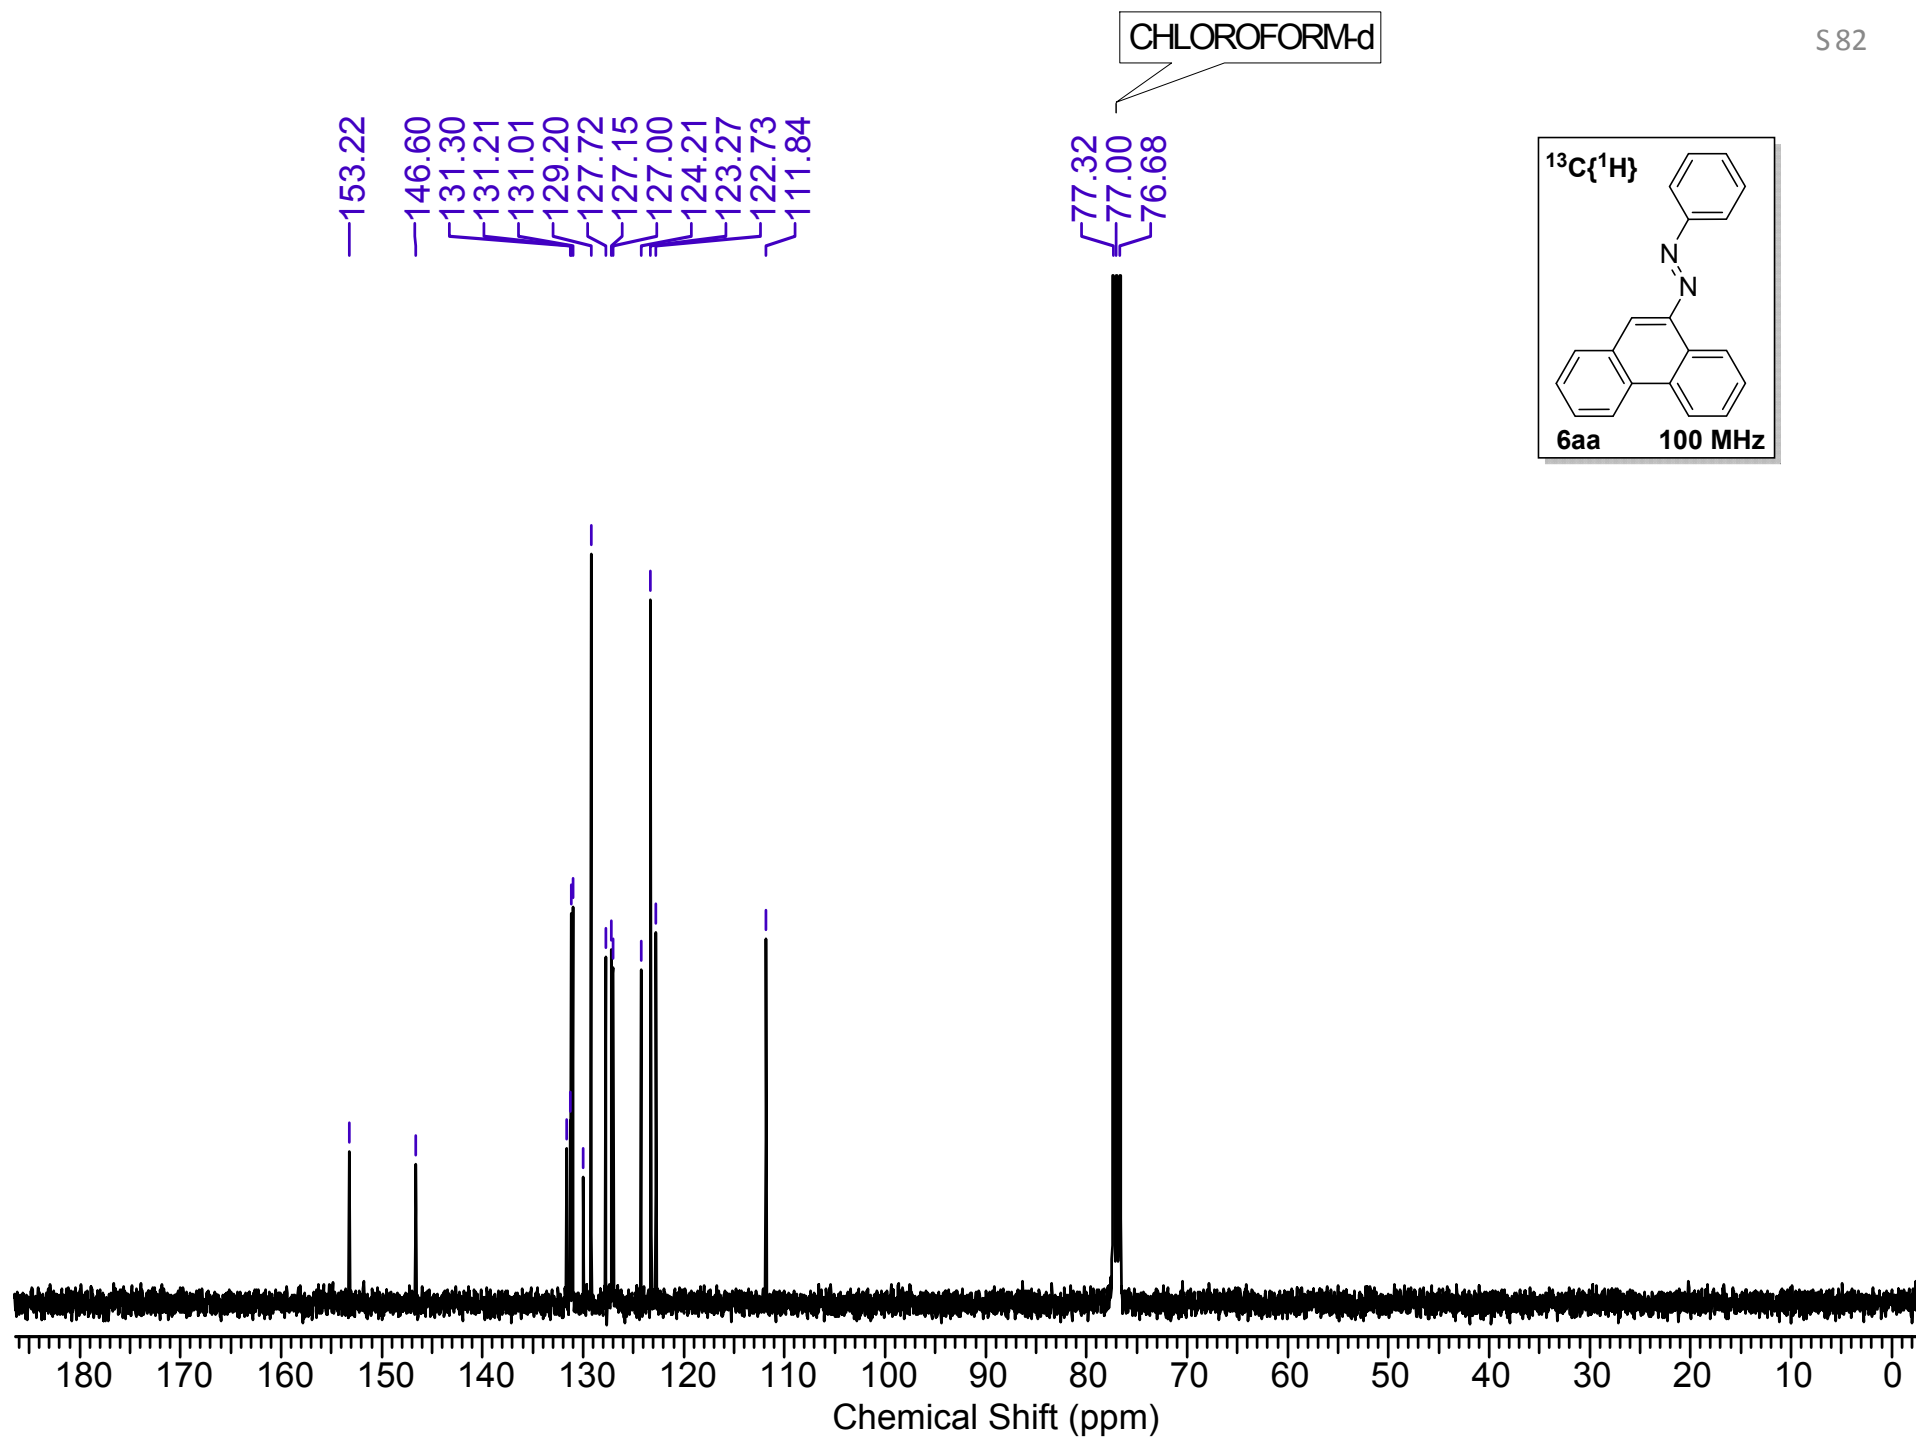

PSD-917\_210505153209 #315 RT: 1.76 AV: 1 NL: 4.34E7  
T: FTMS + p ESI Full ms [100.0000-1500.0000]

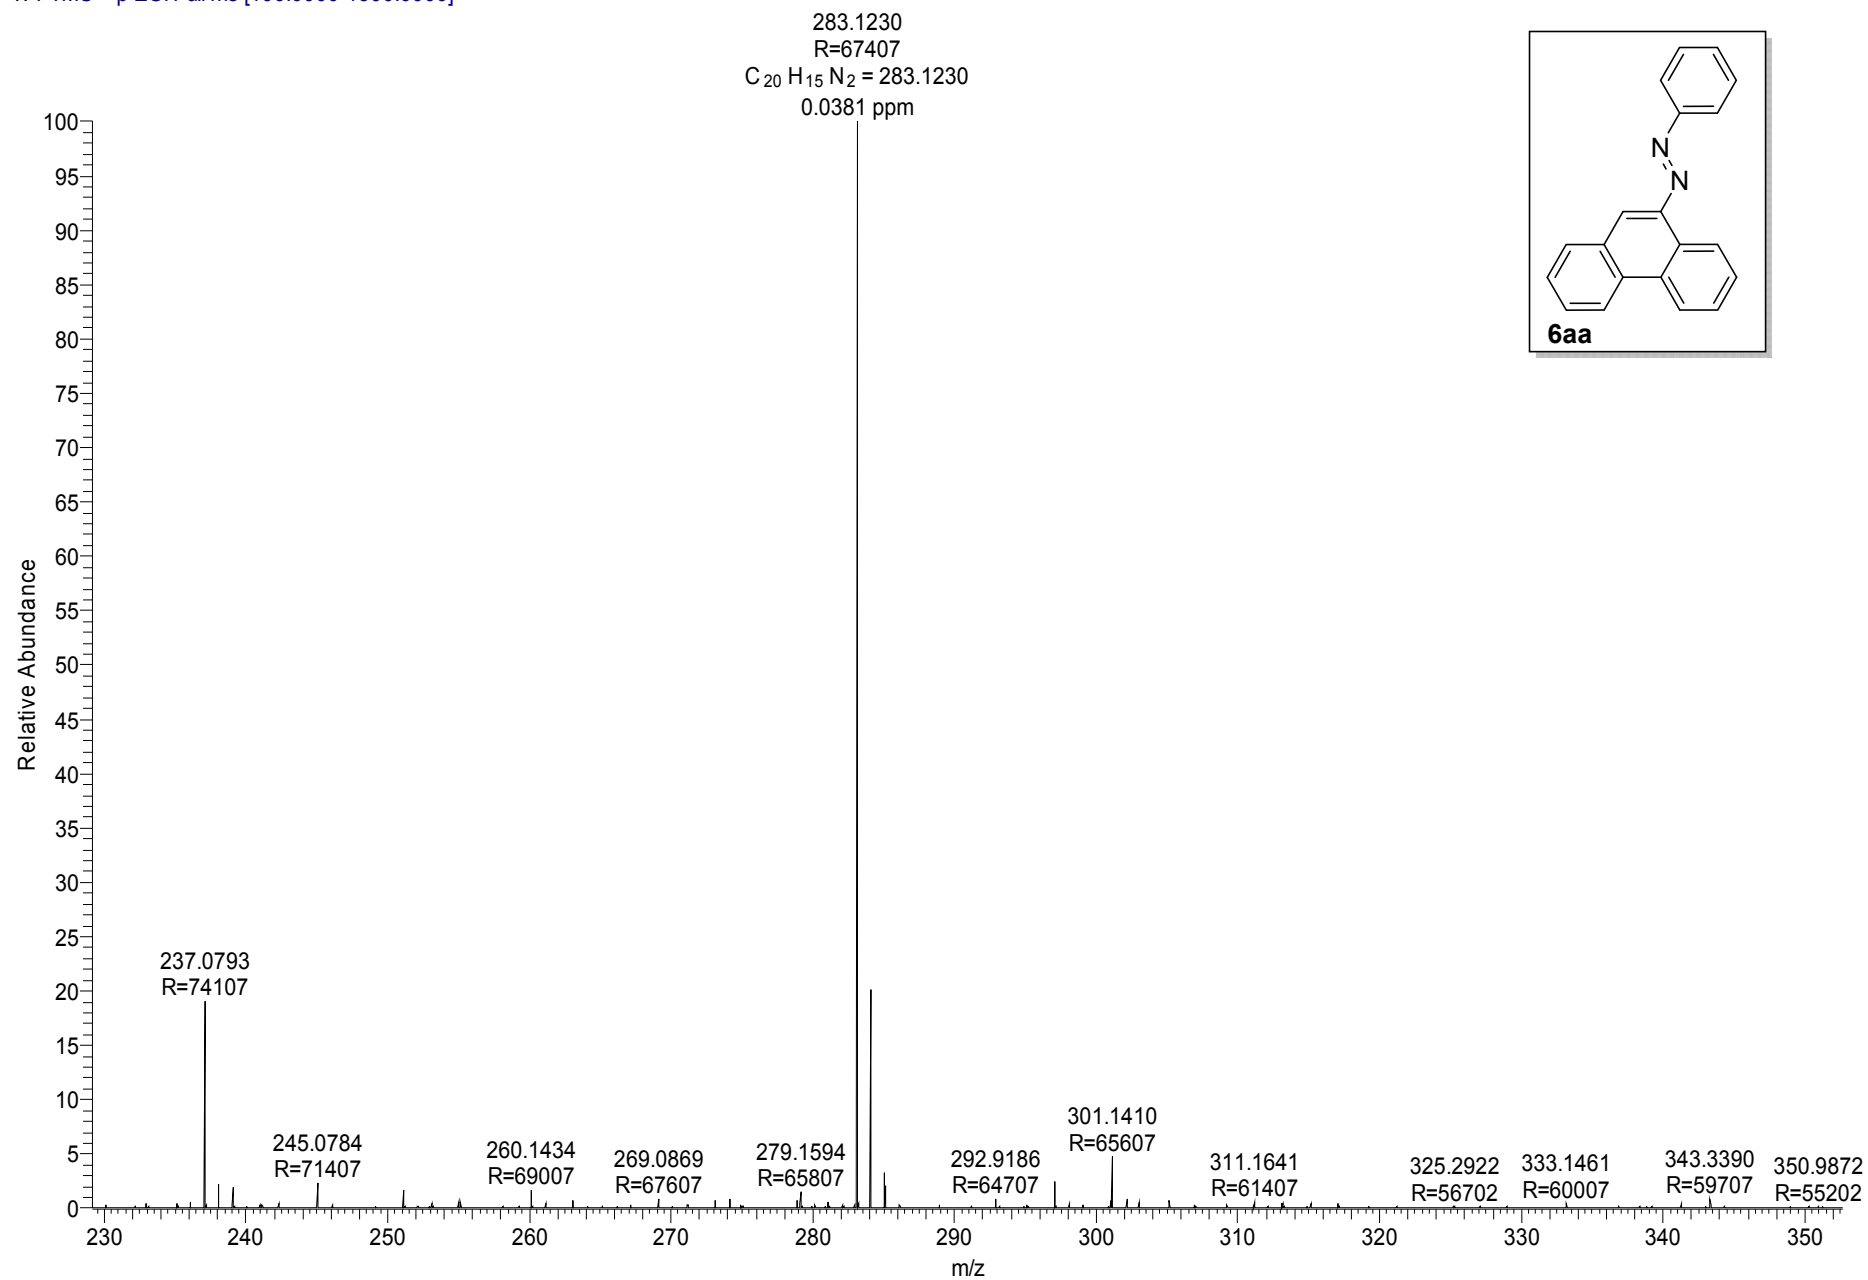

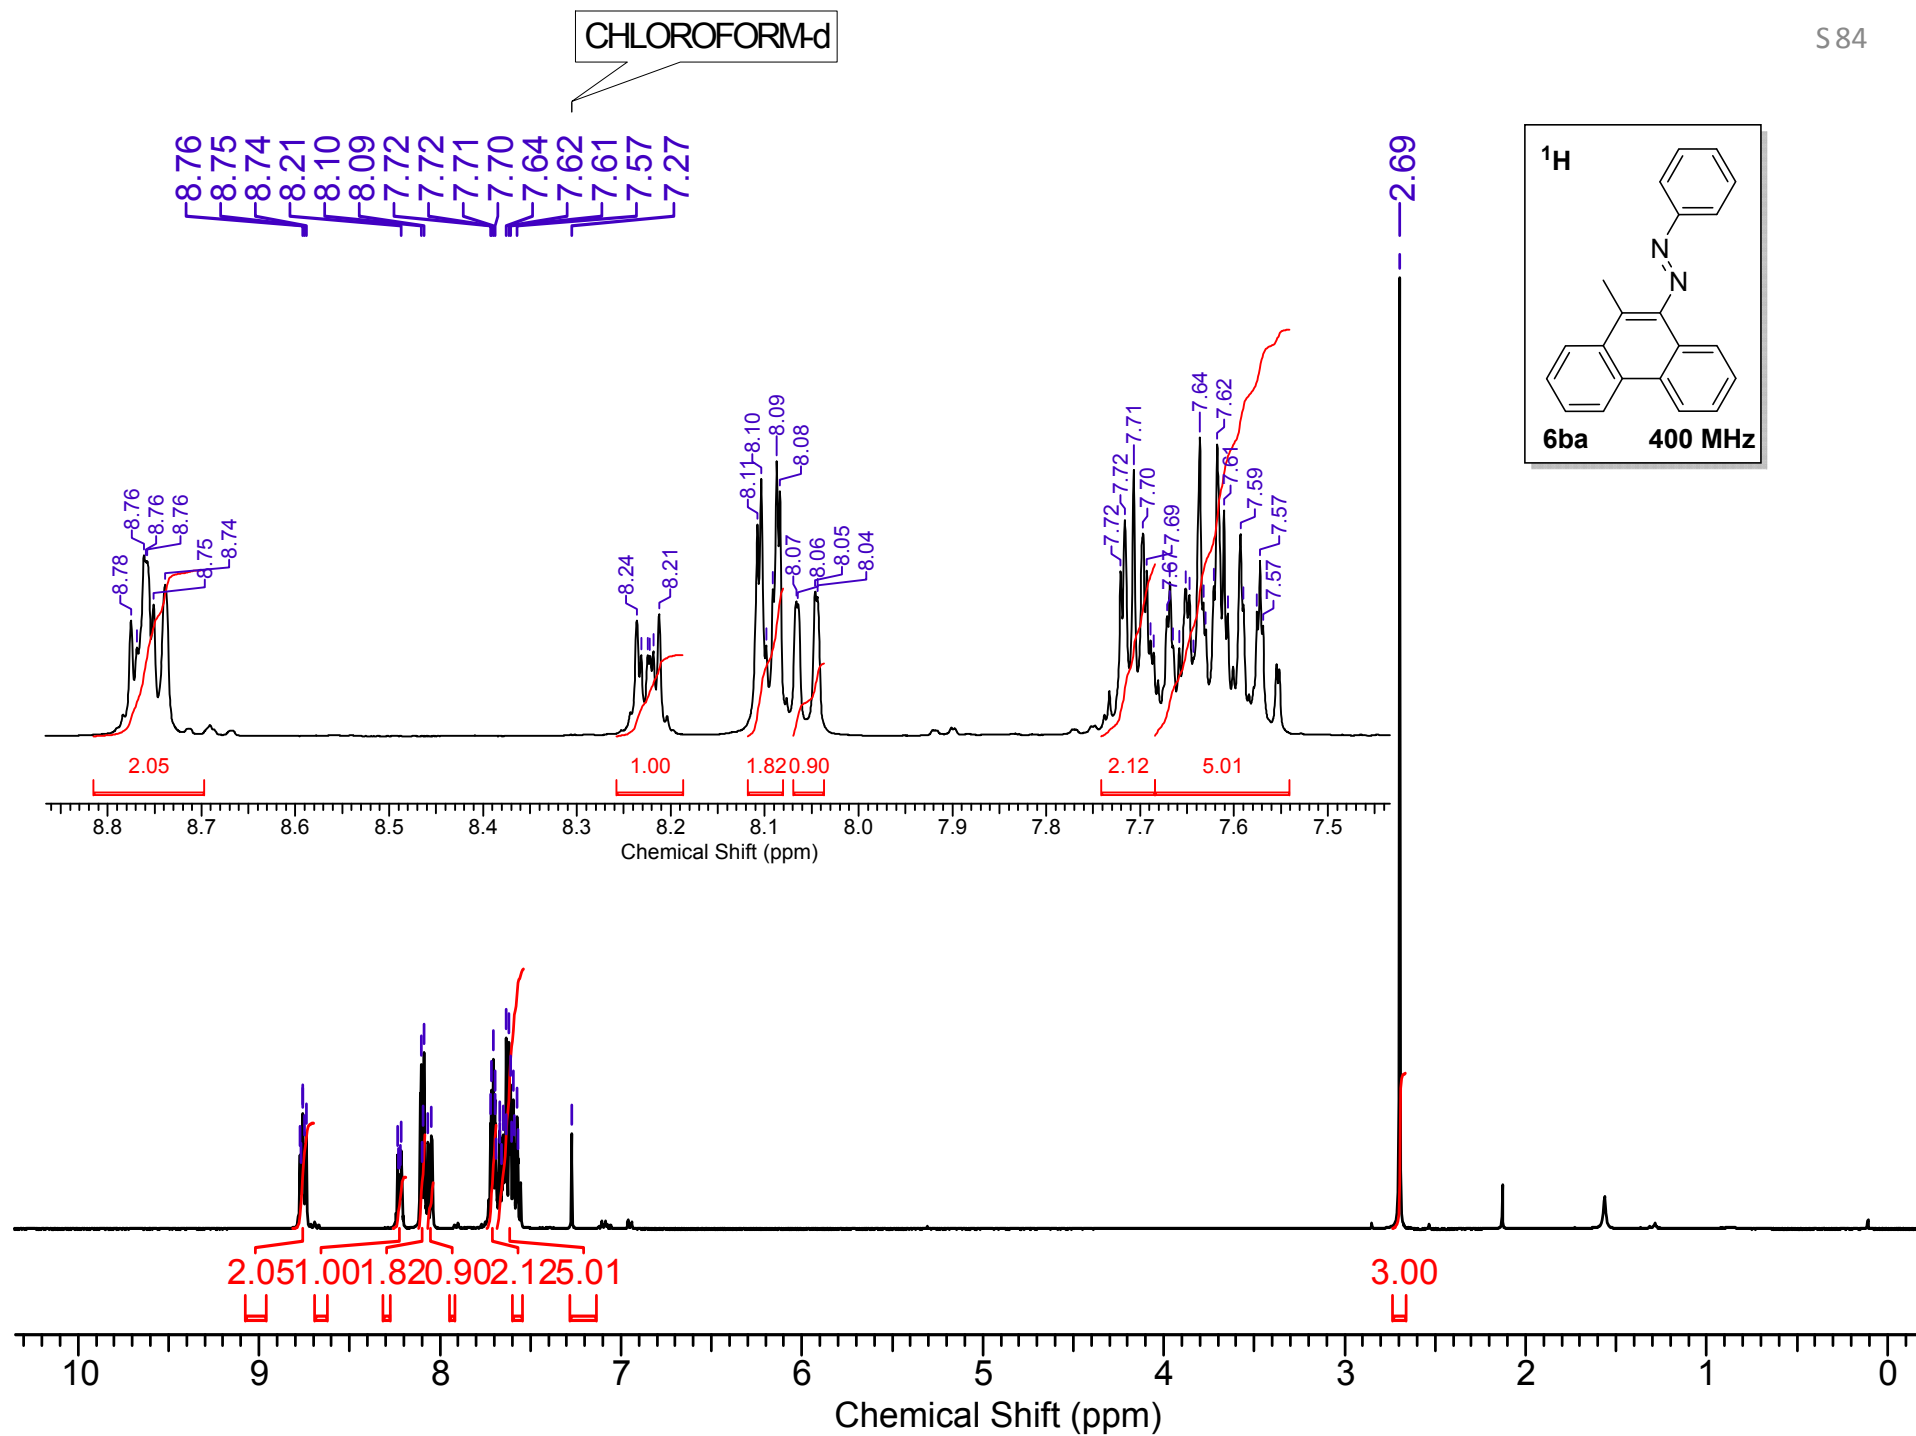

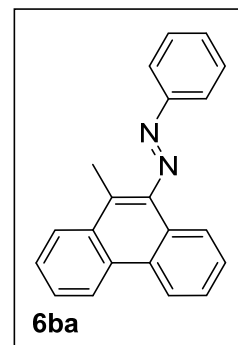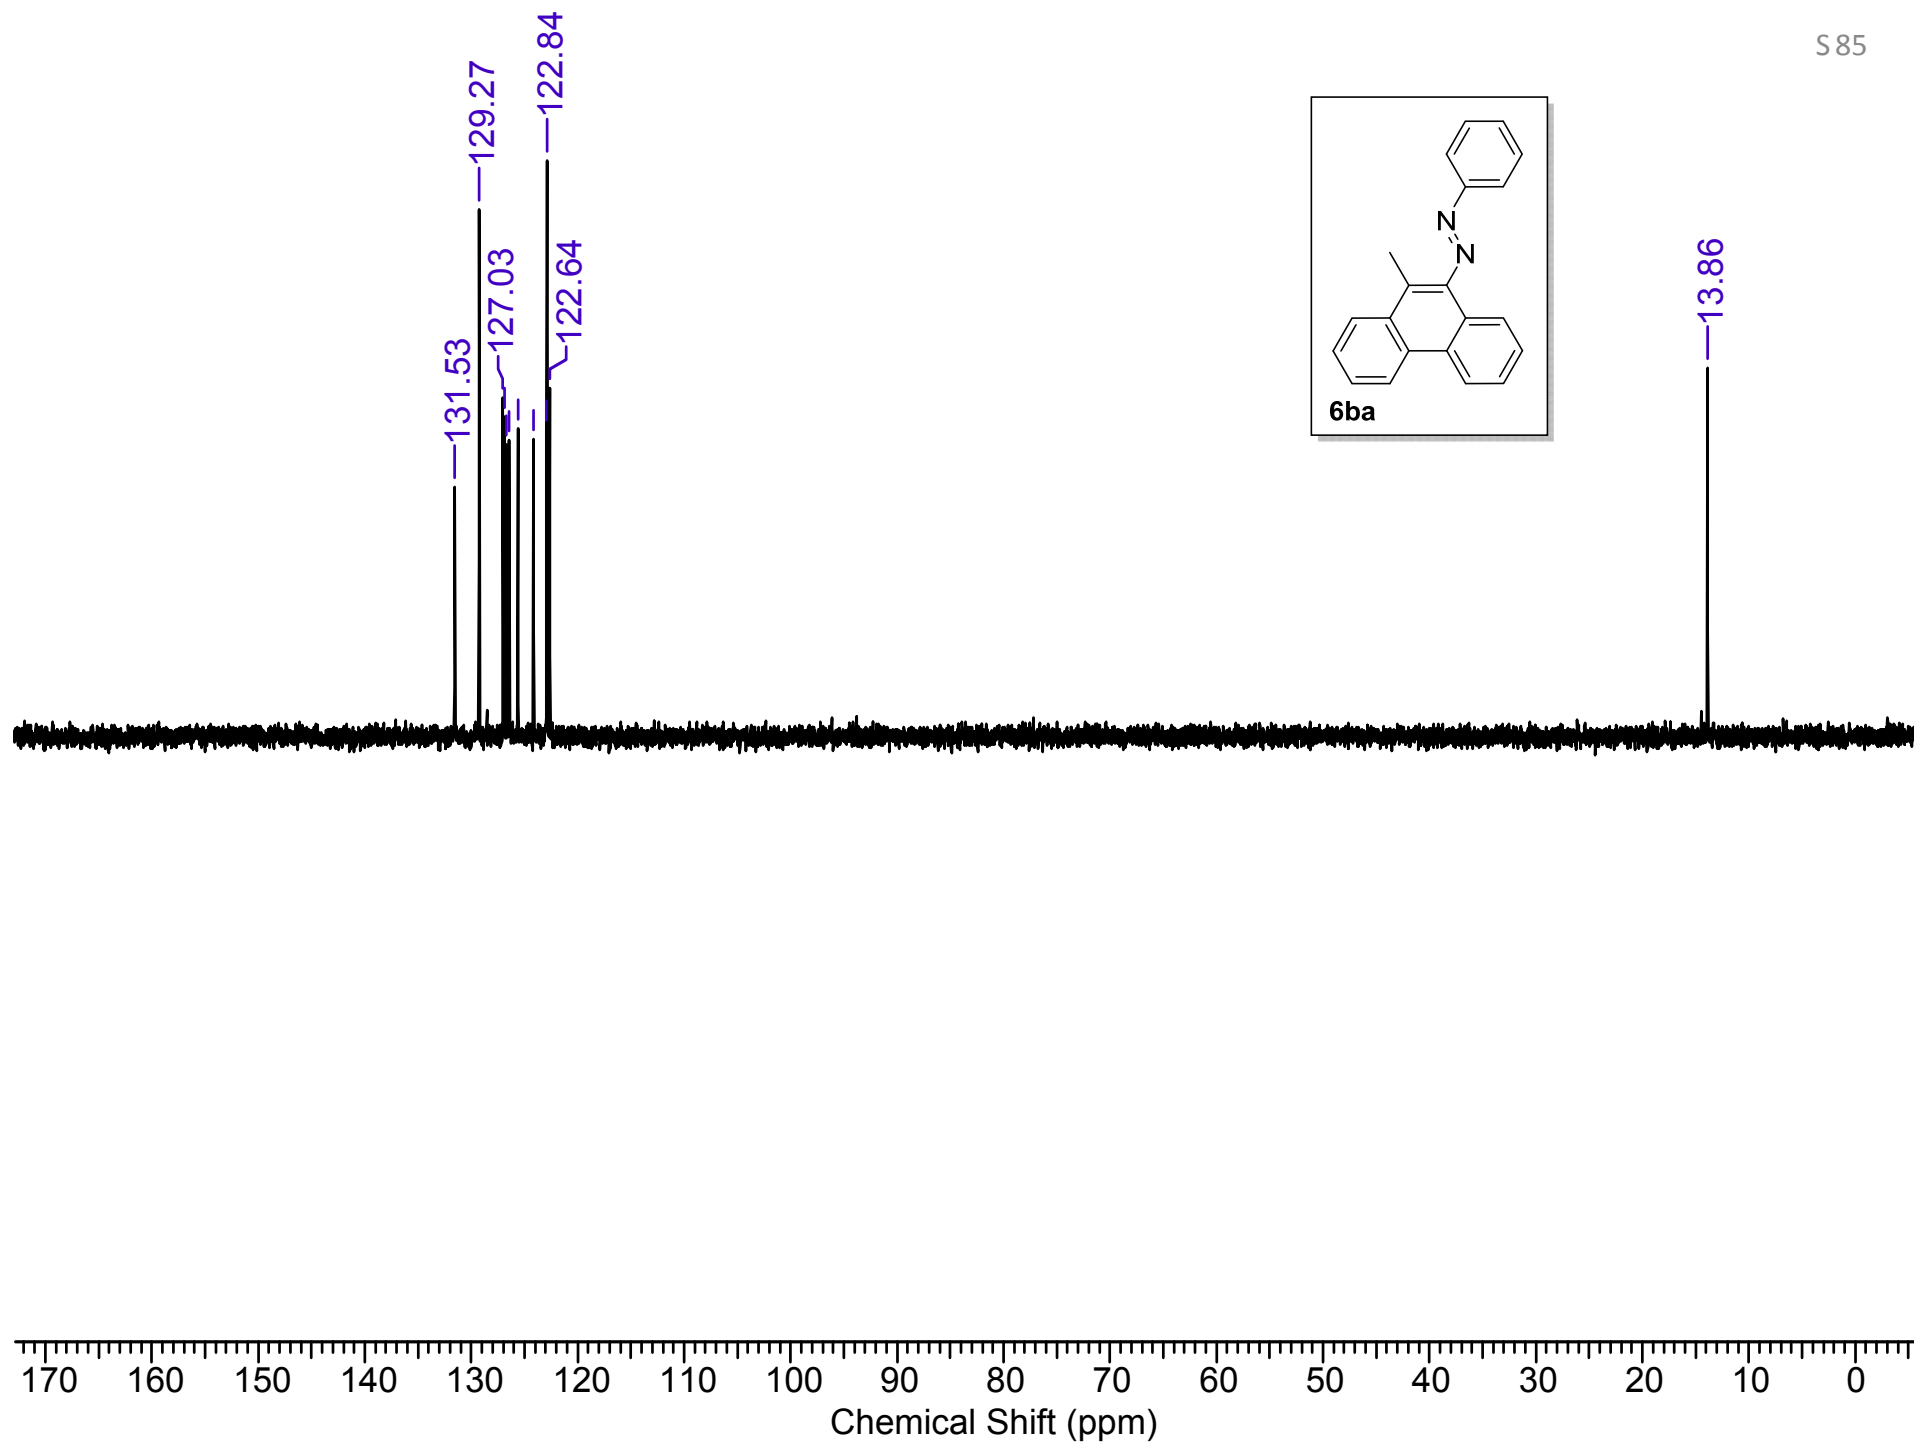

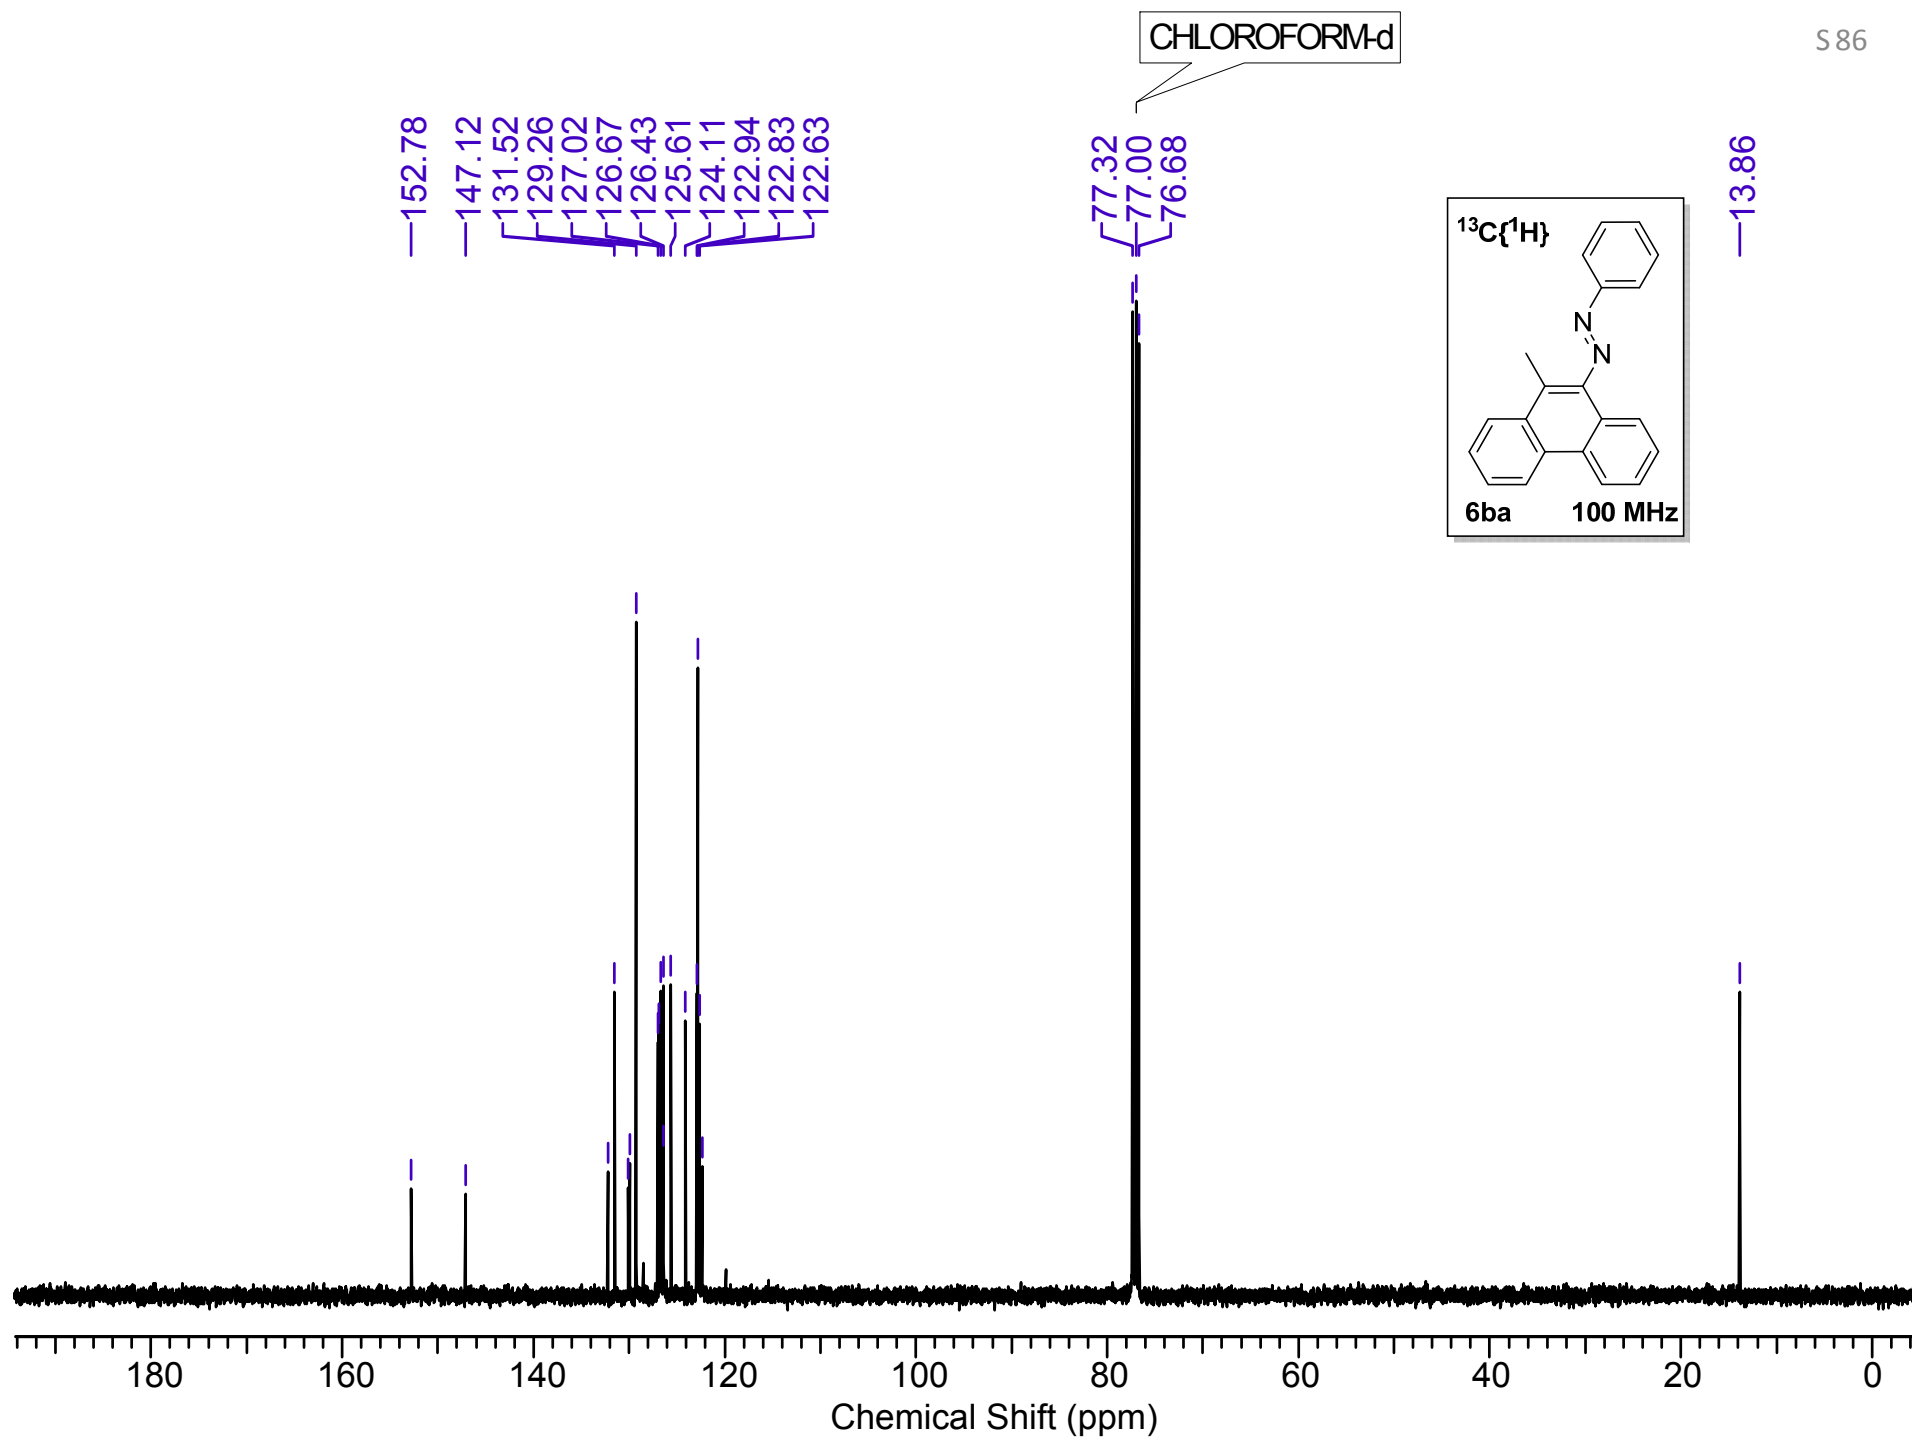

PSD-Simple #516 RT: 2.77 AV: 1 NL: 5.21E8  
T: FTMS + p ESI Full ms [100.0000-1500.0000]

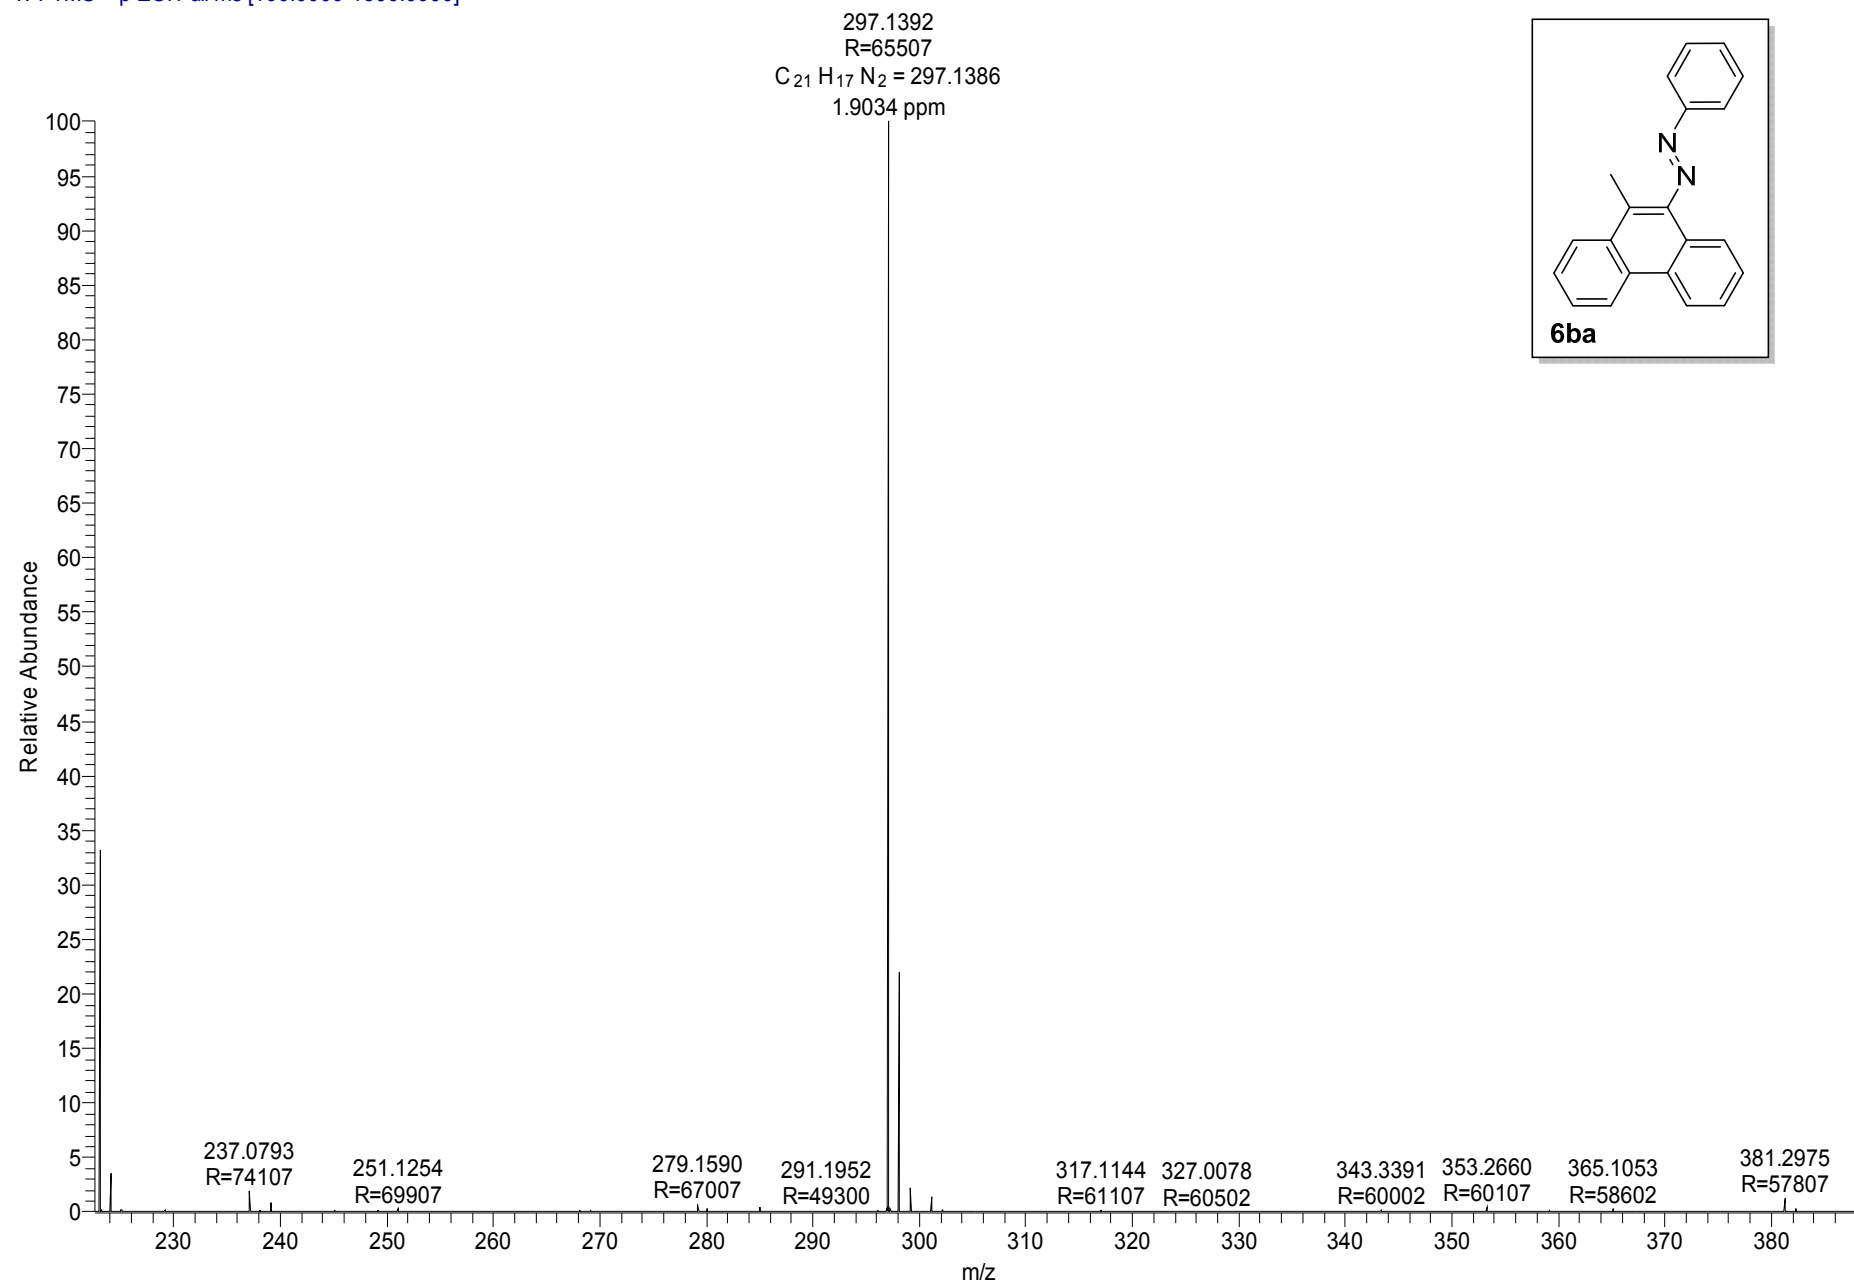

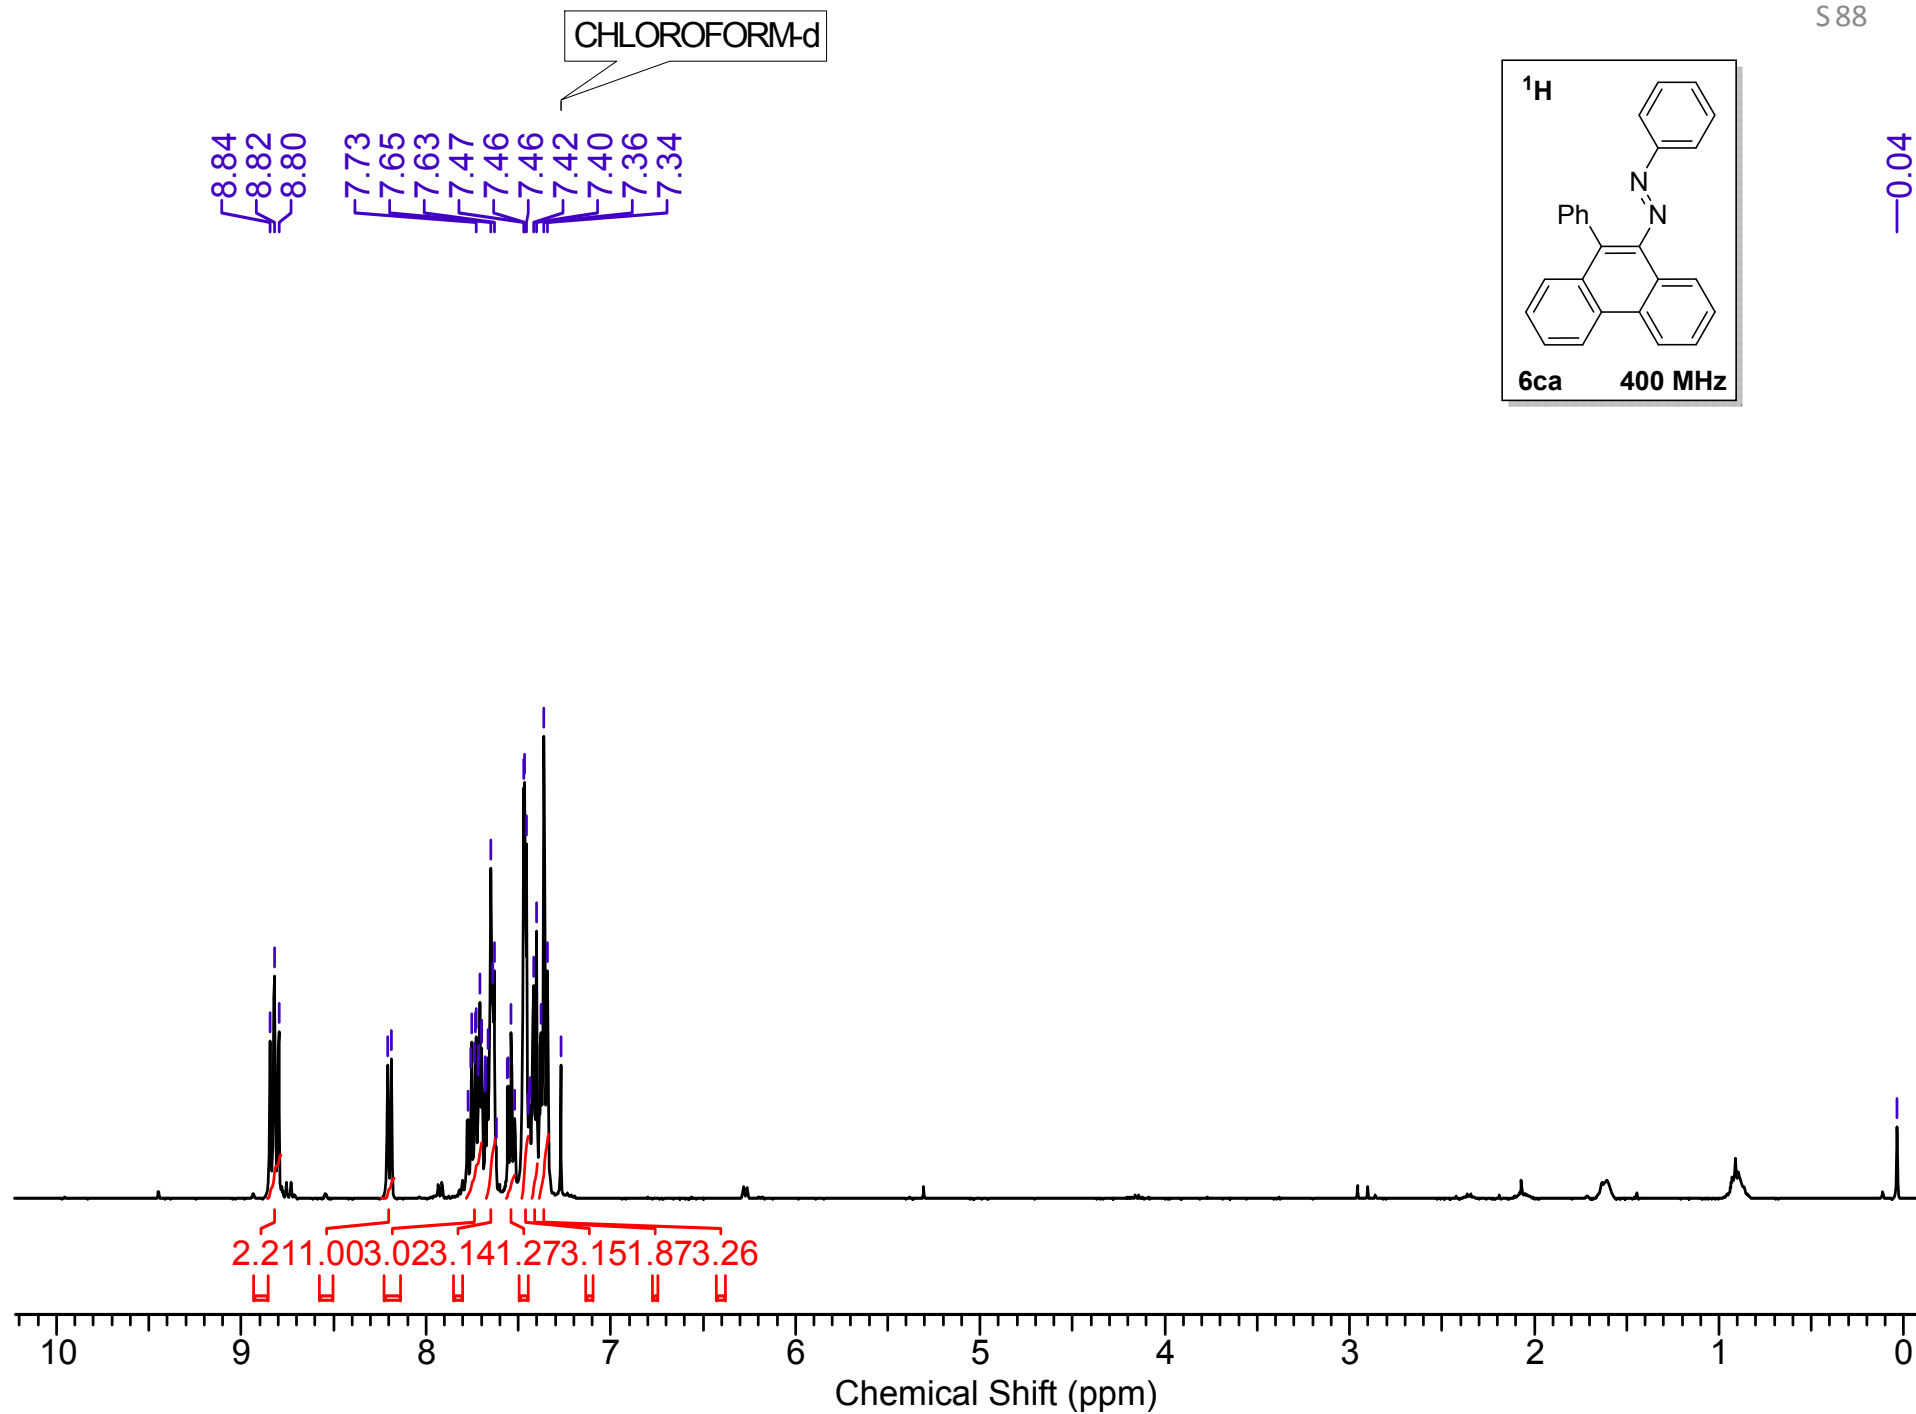



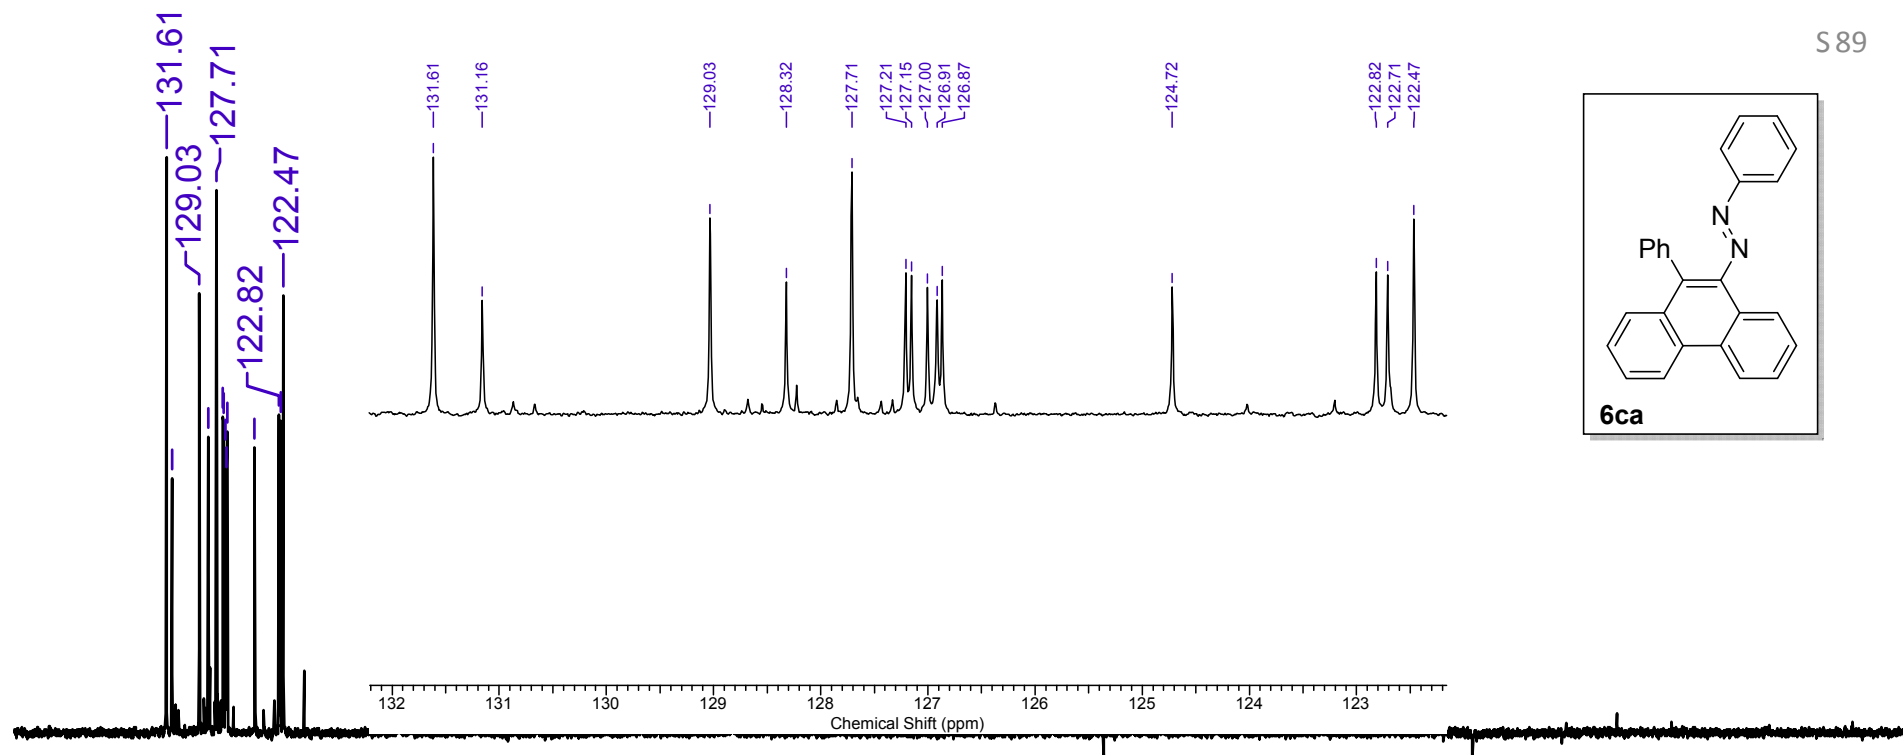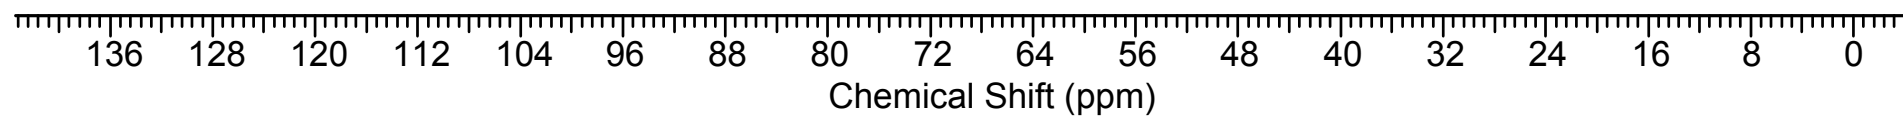

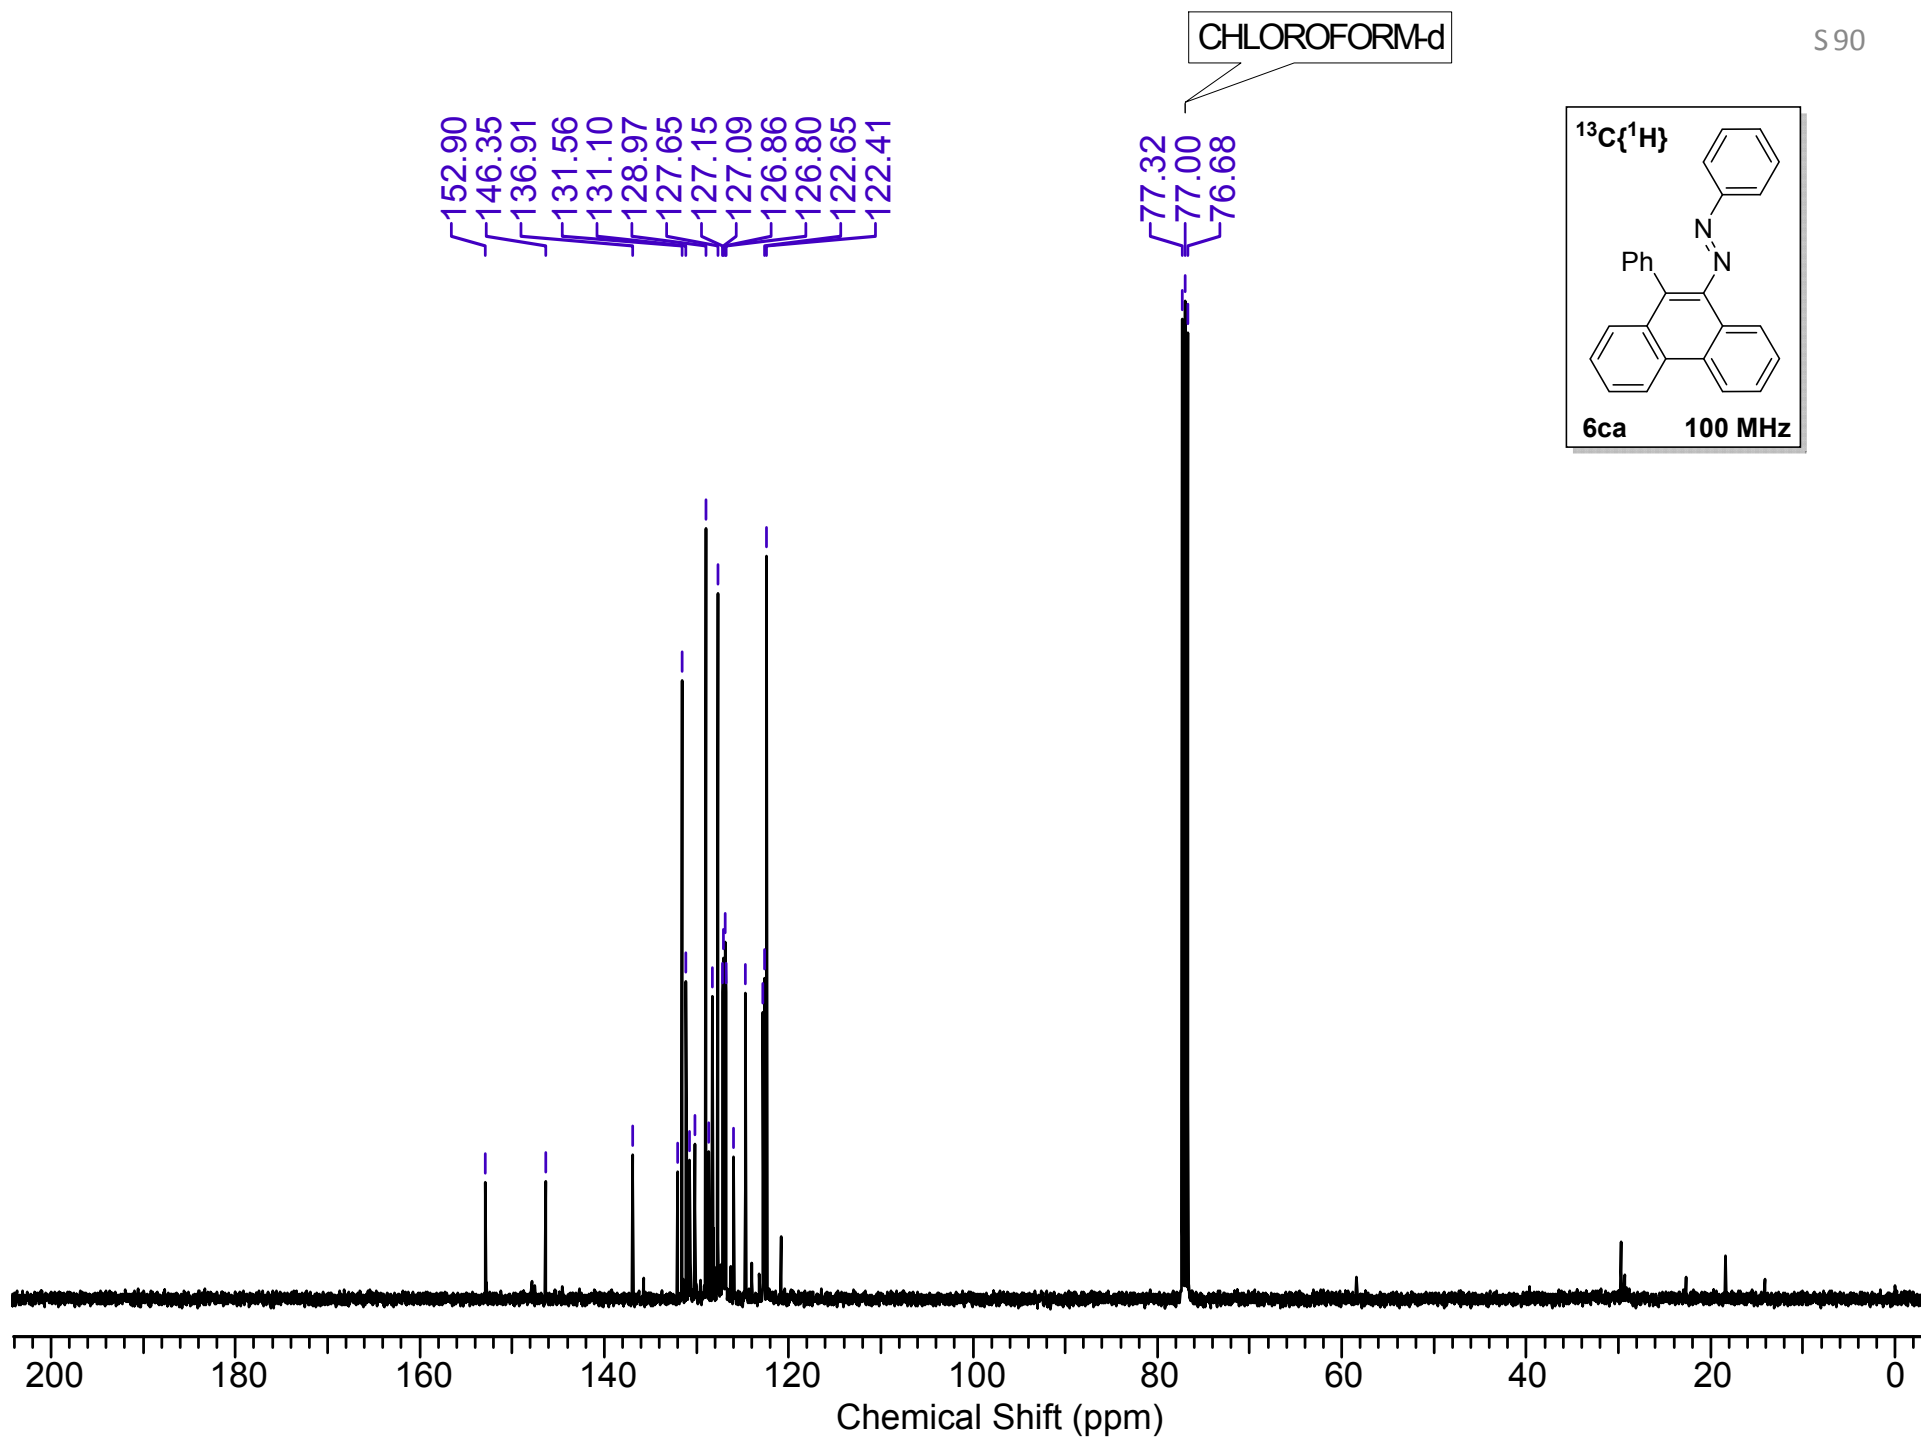

PSD 926

IISER PUNE

1: TOF MS ES+  
3.31e5PSD 926 190 (3.475) AM2 (Ar,20000.0,556.28,0.00,LS 3); Sm (SG,  
300.00)CALCULATED MASS  
(M+H)+ 359.1548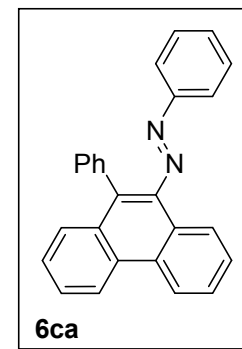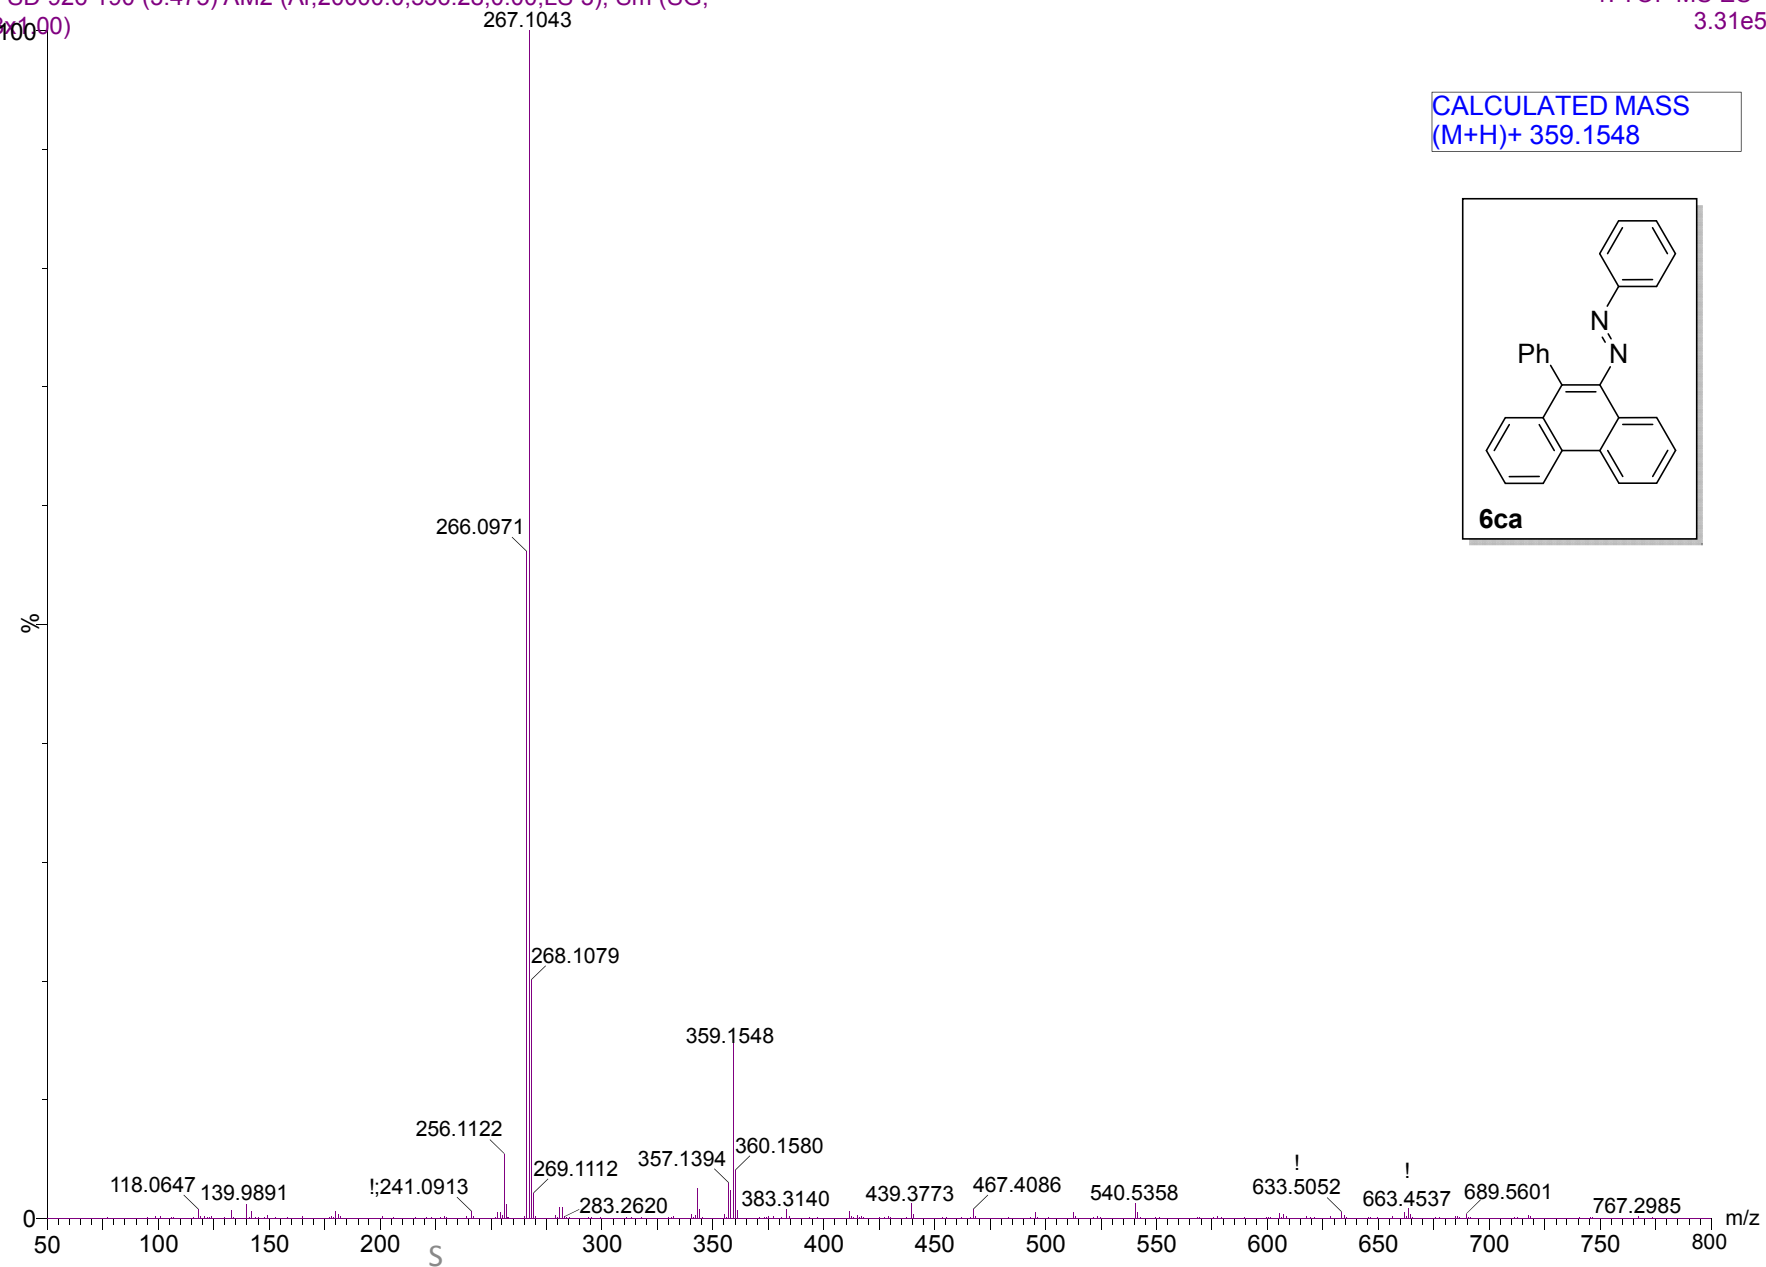

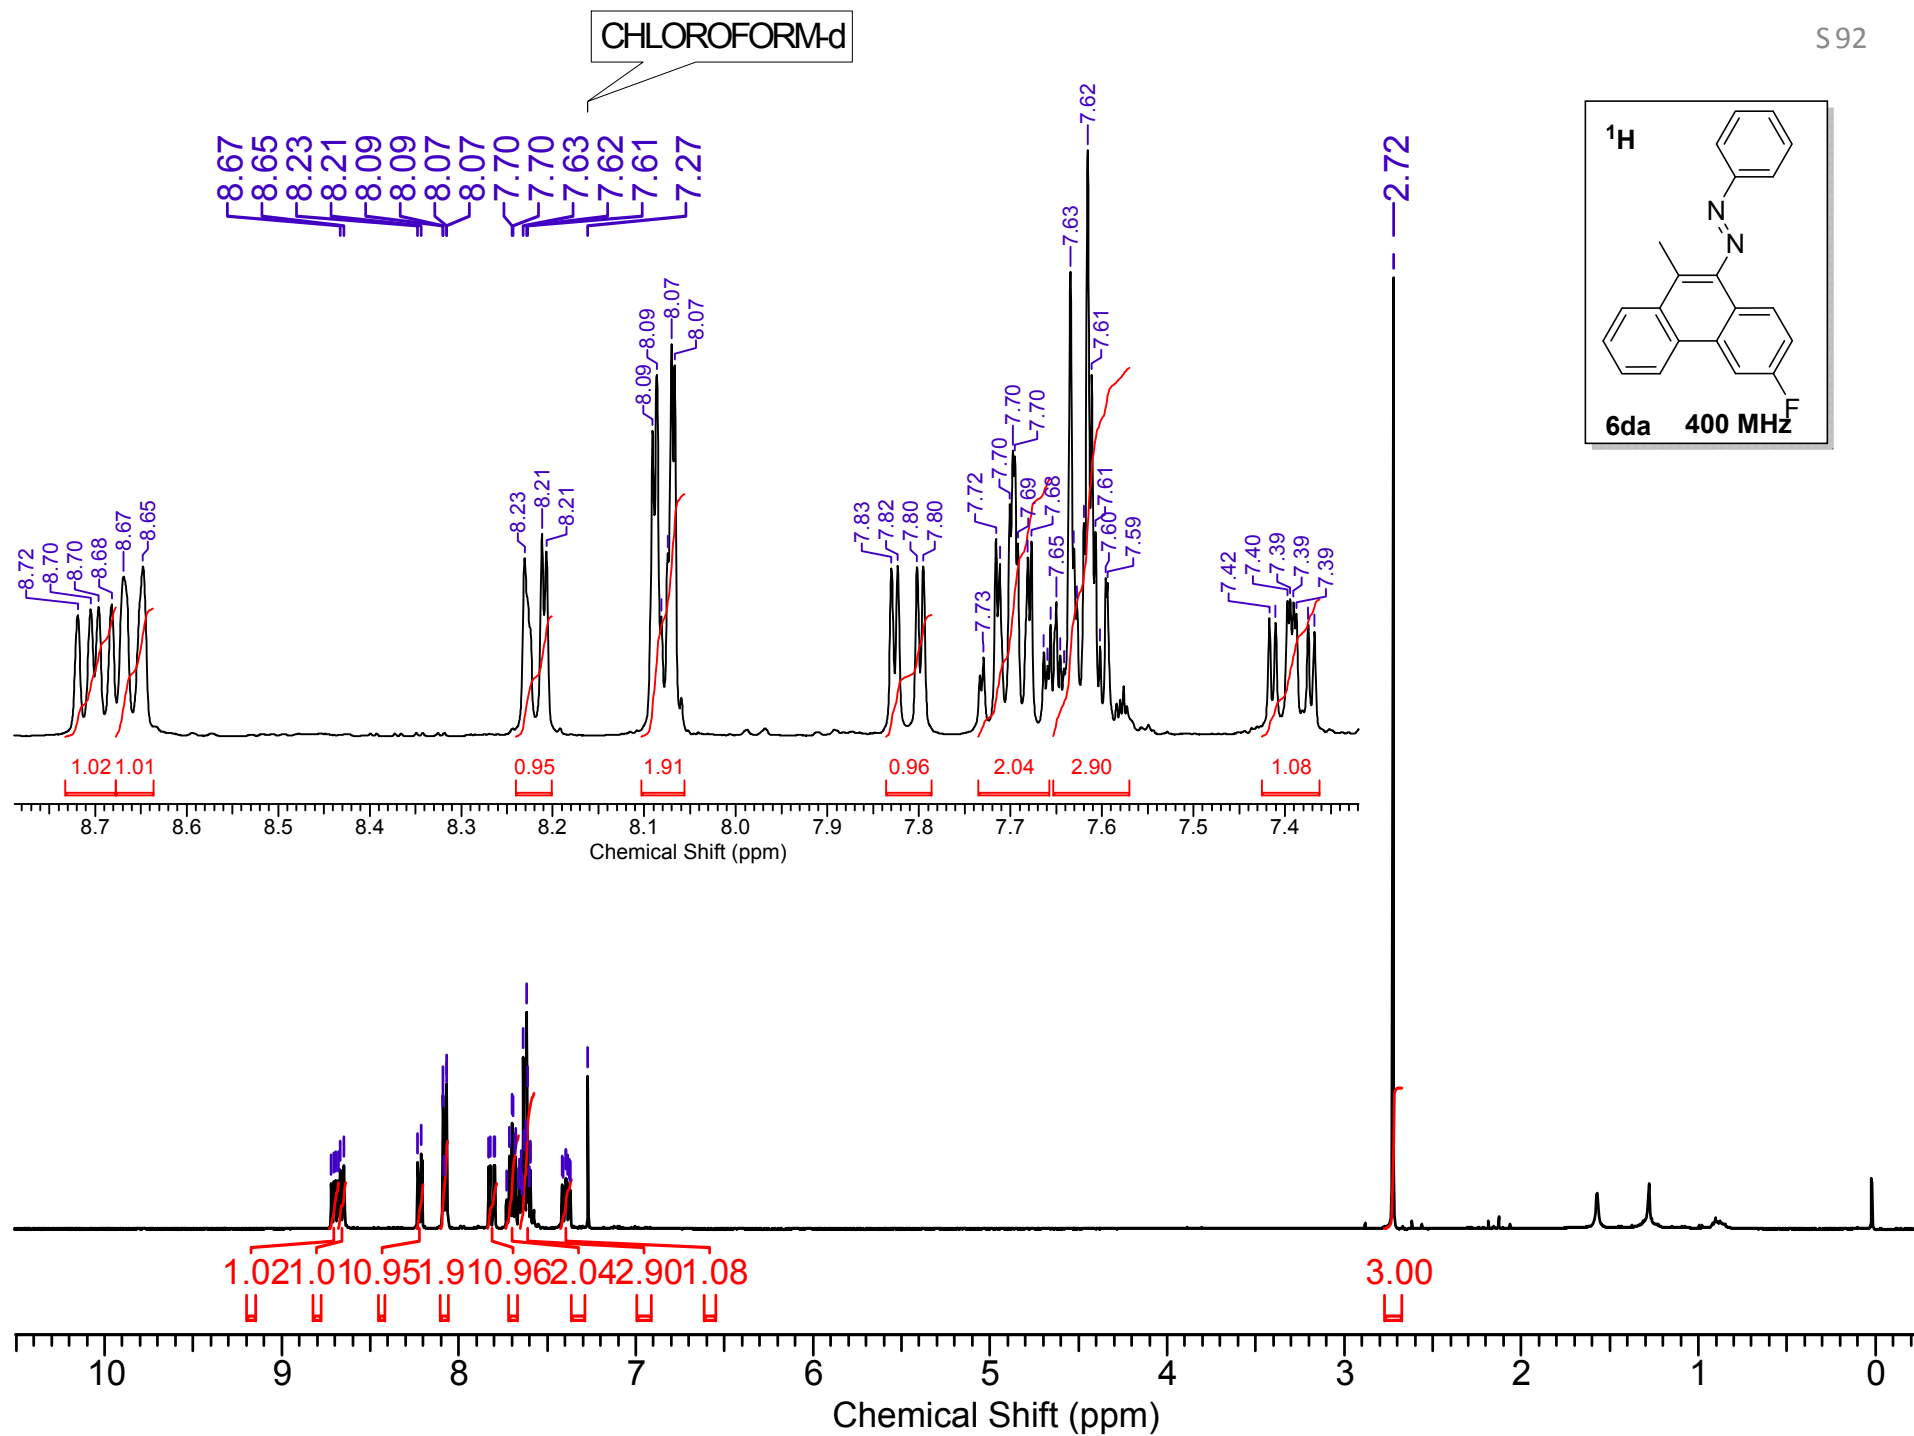

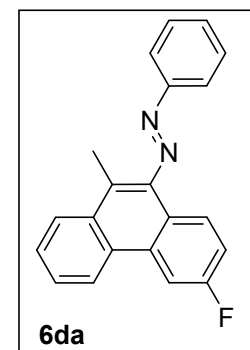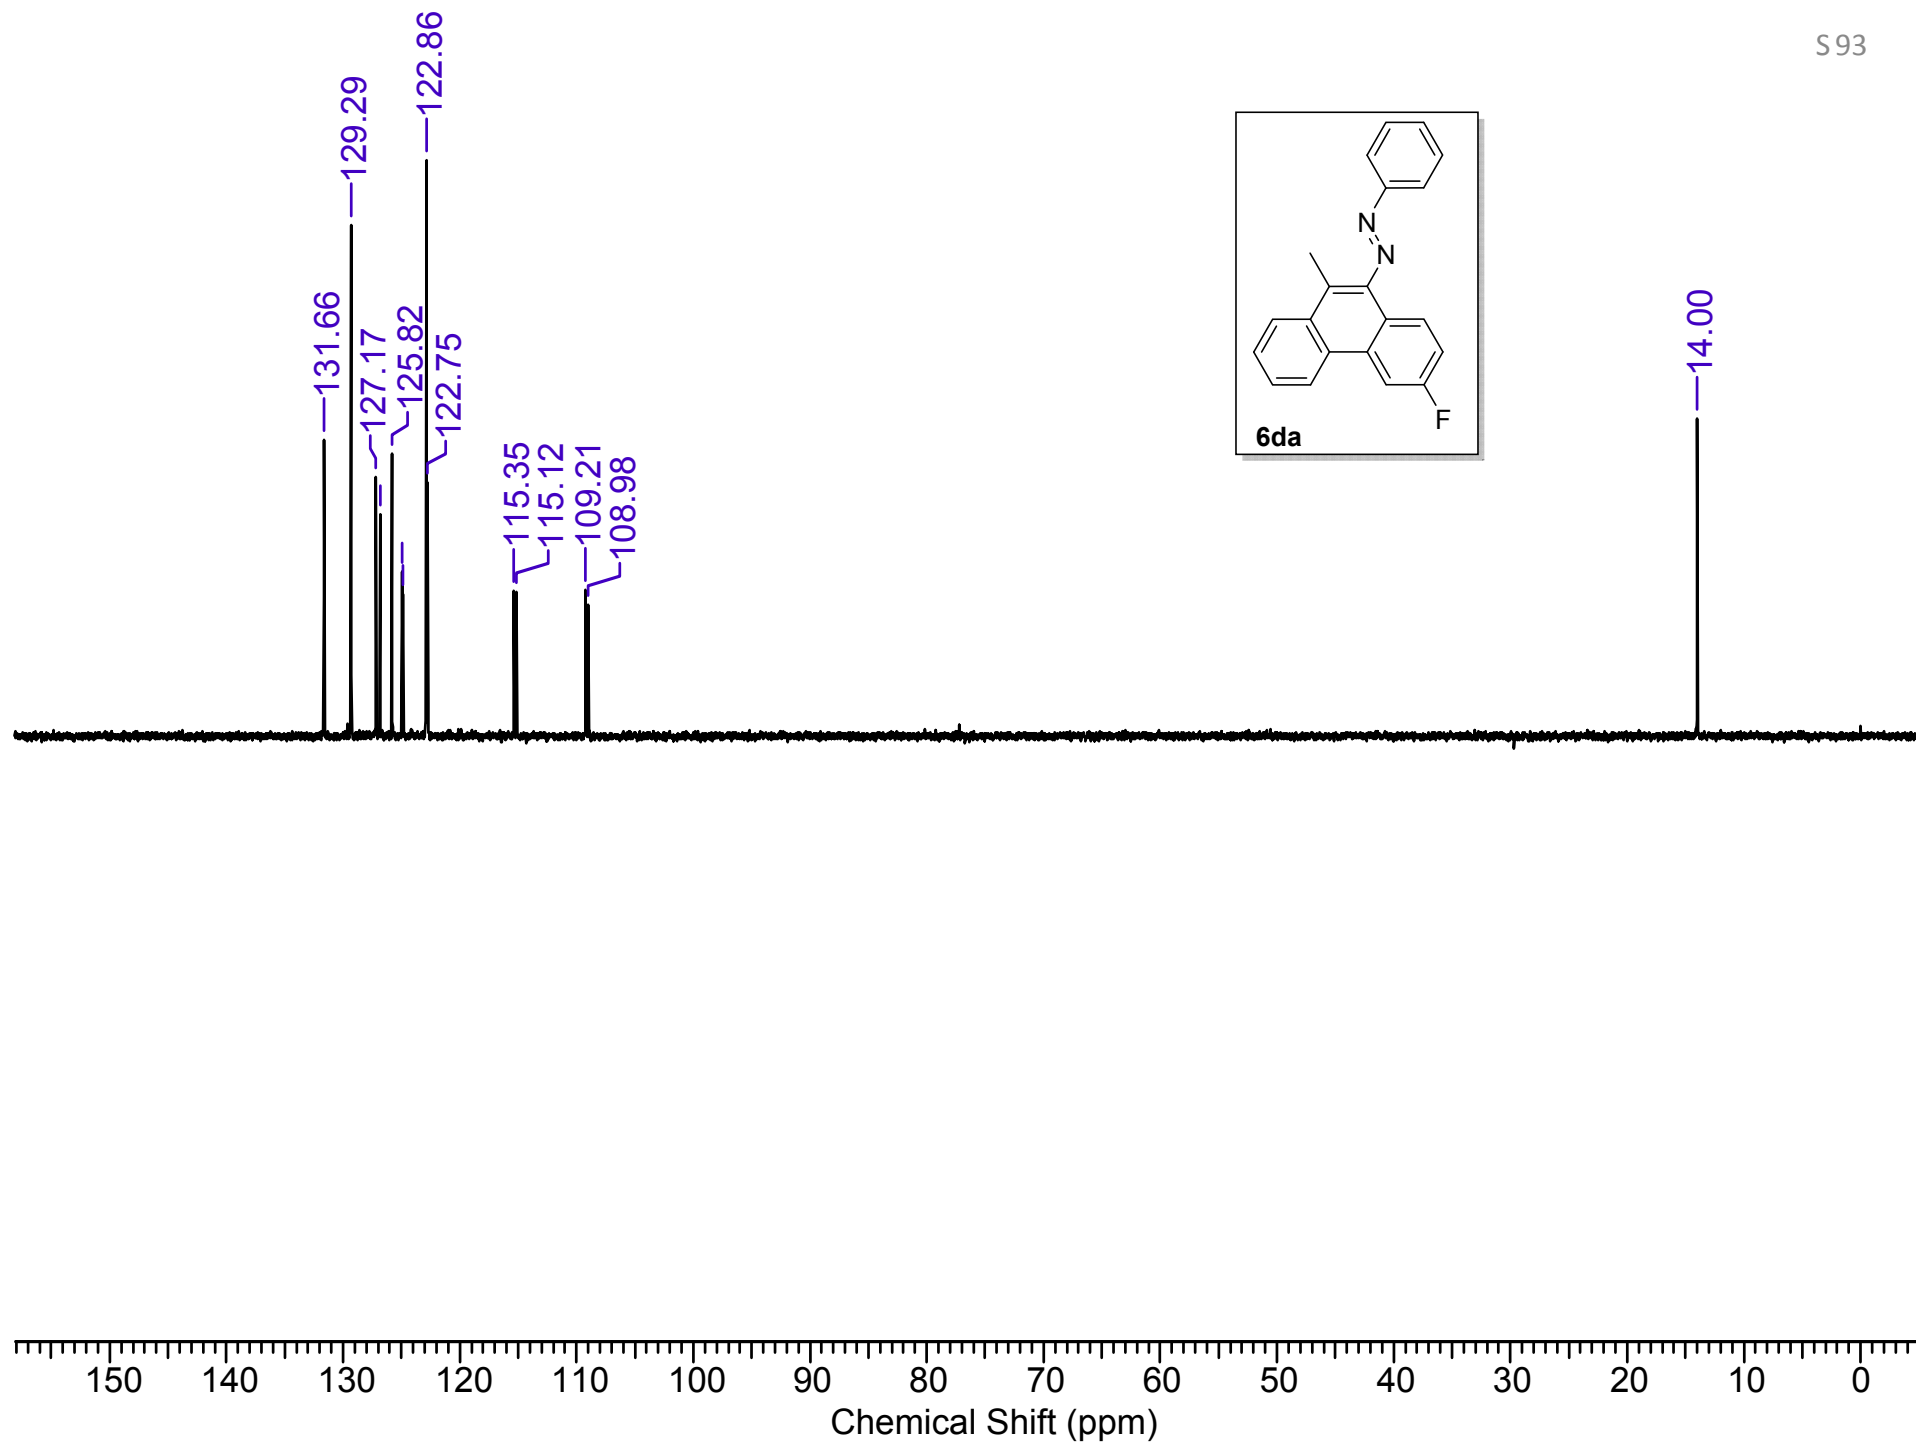

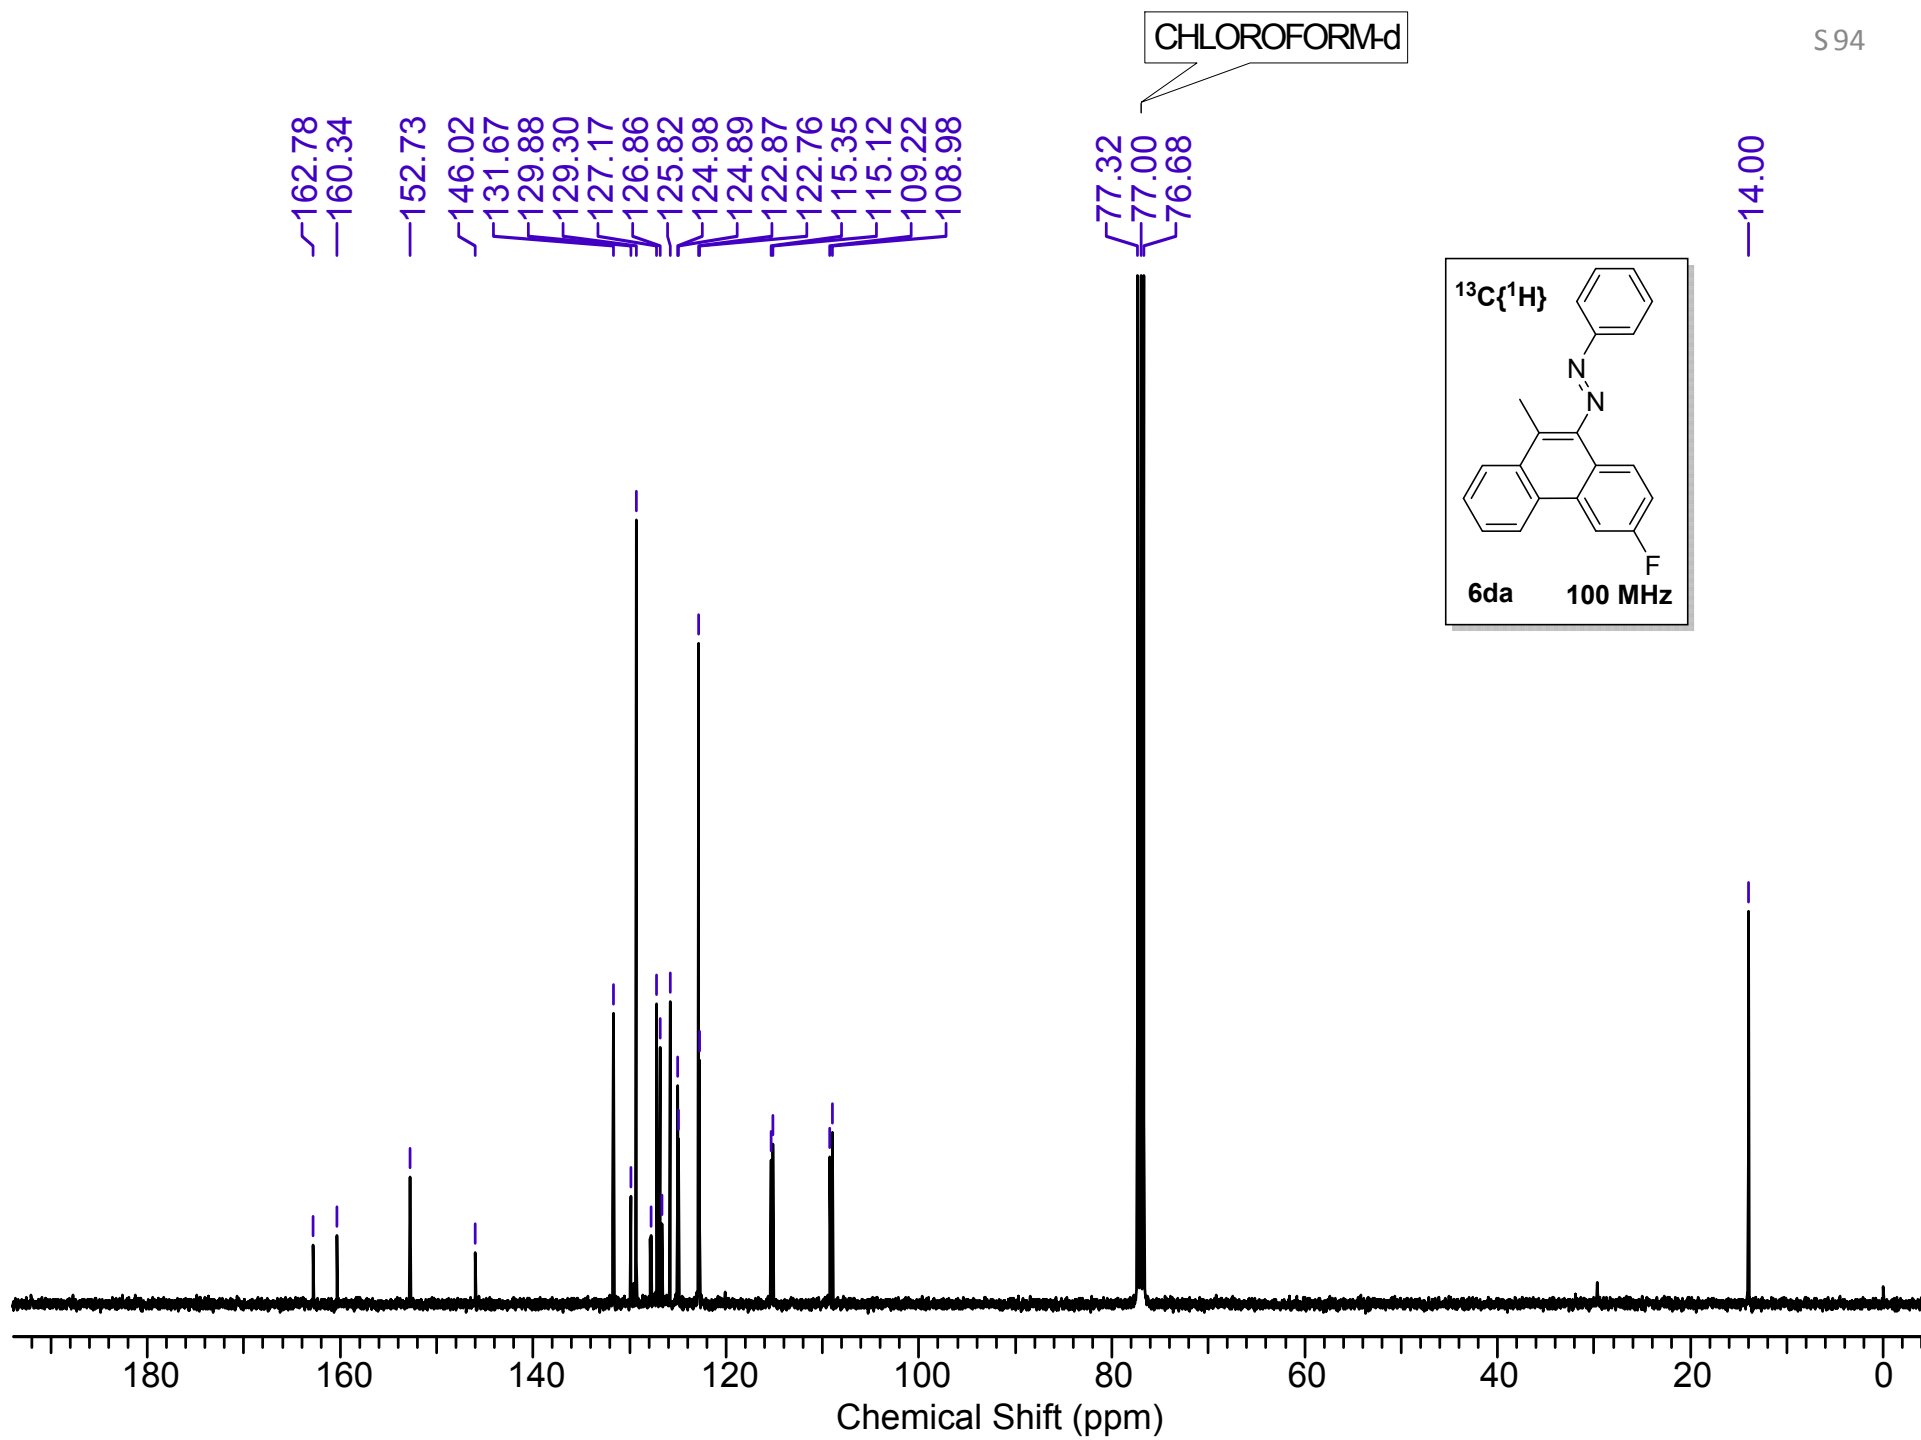

PSD-886 #515 RT: 3.12 AV: 1 NL: 9.75E6  
T: FTMS + p ESI Full ms [100.0000-1500.0000]

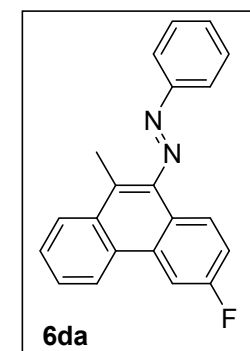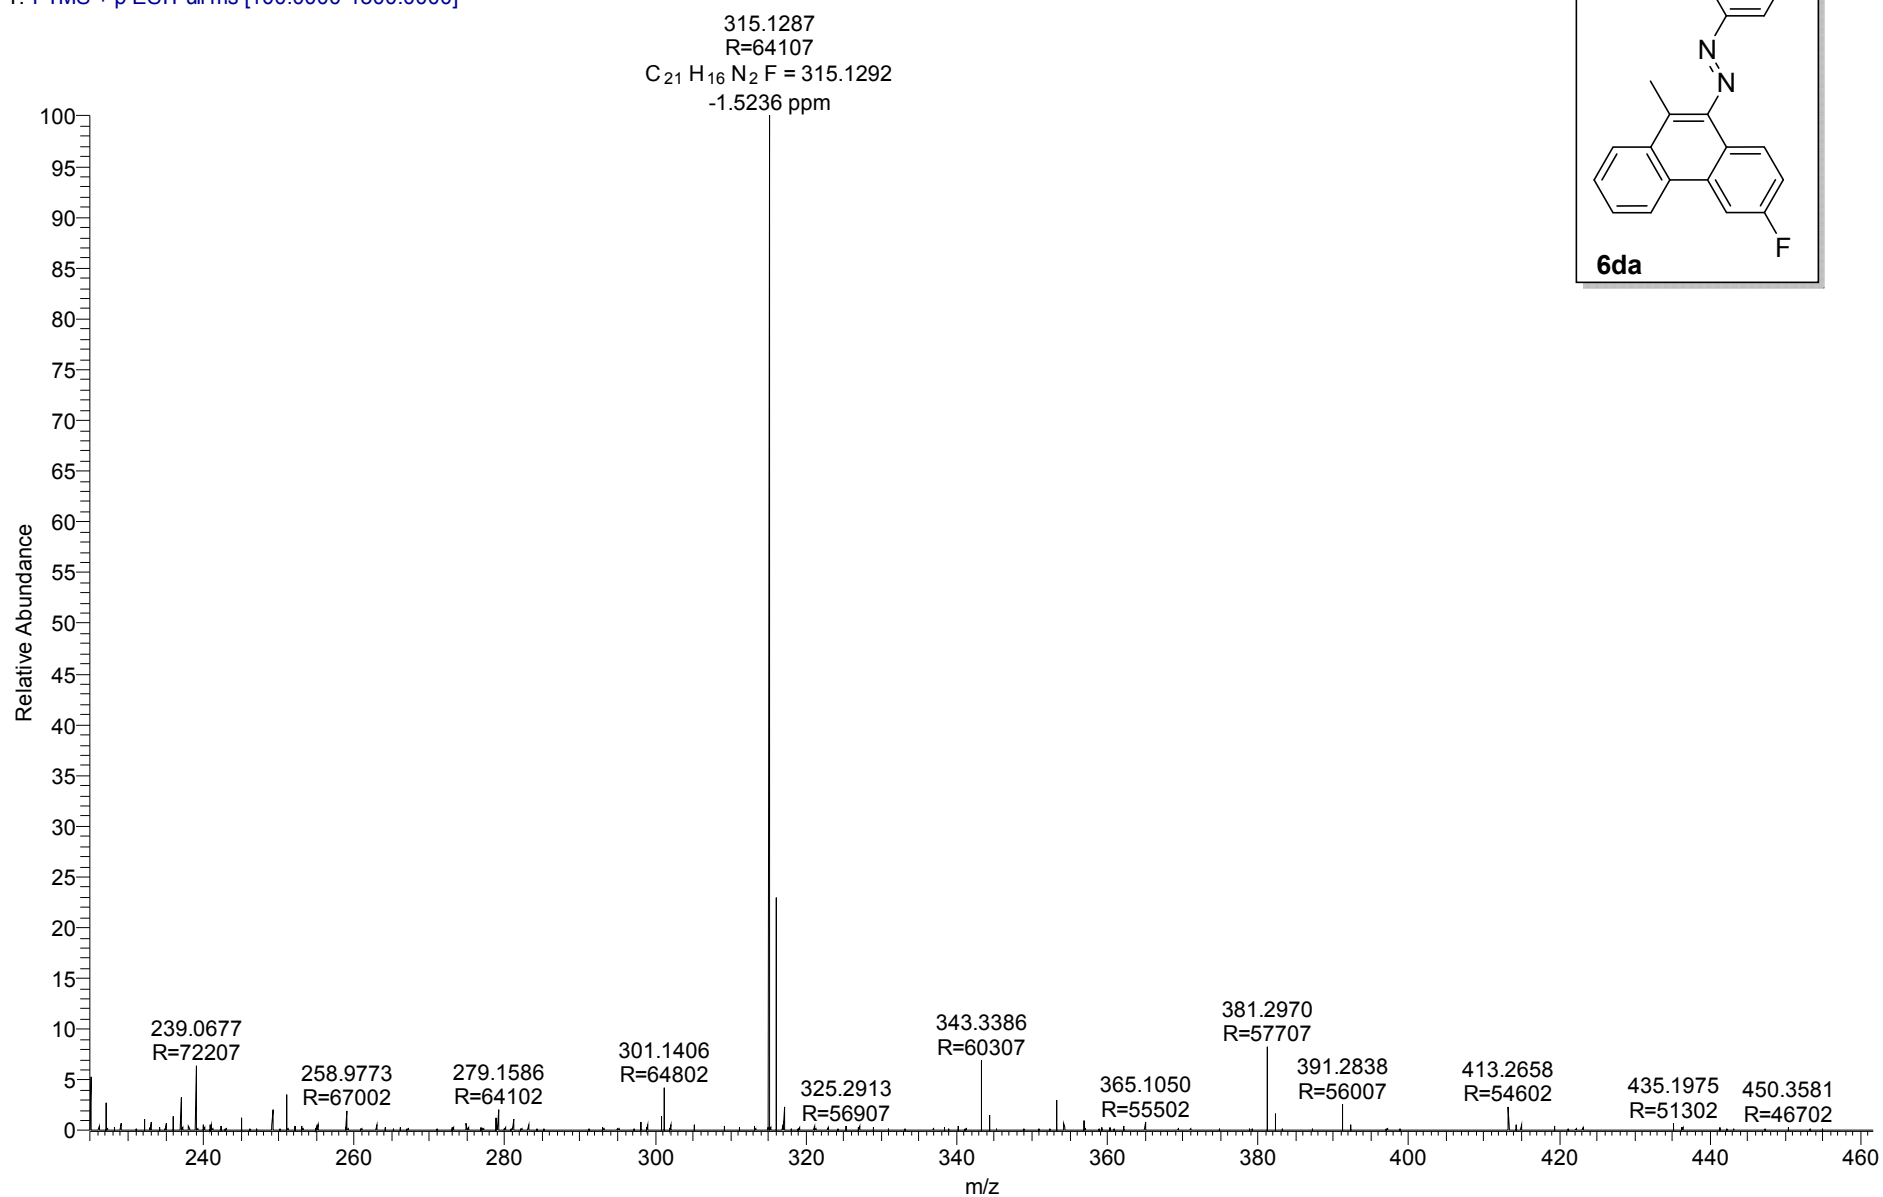

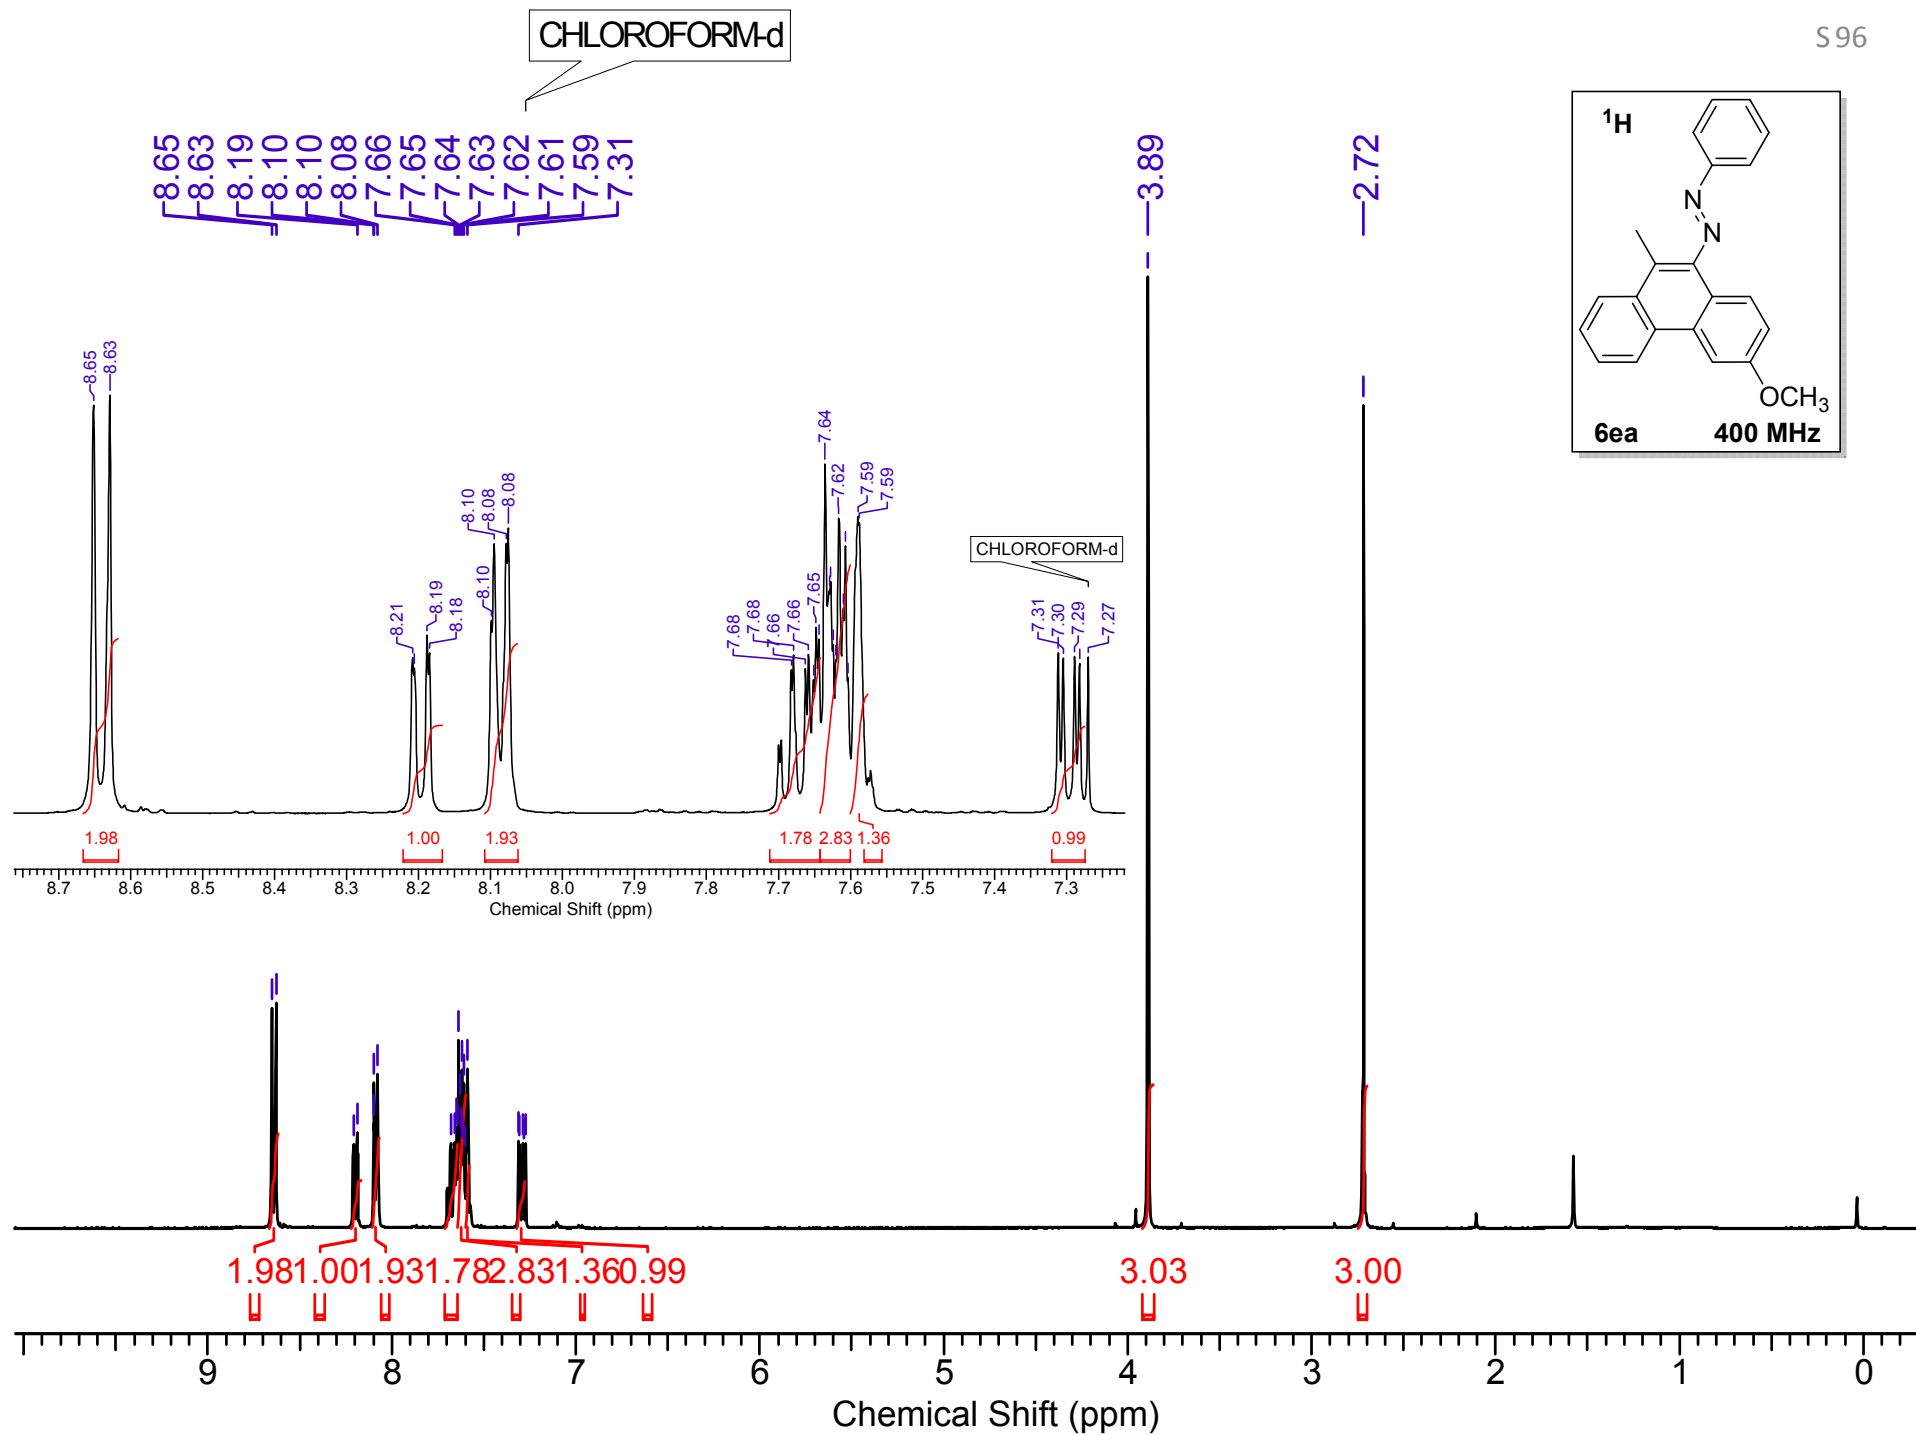



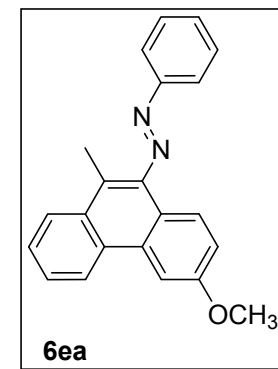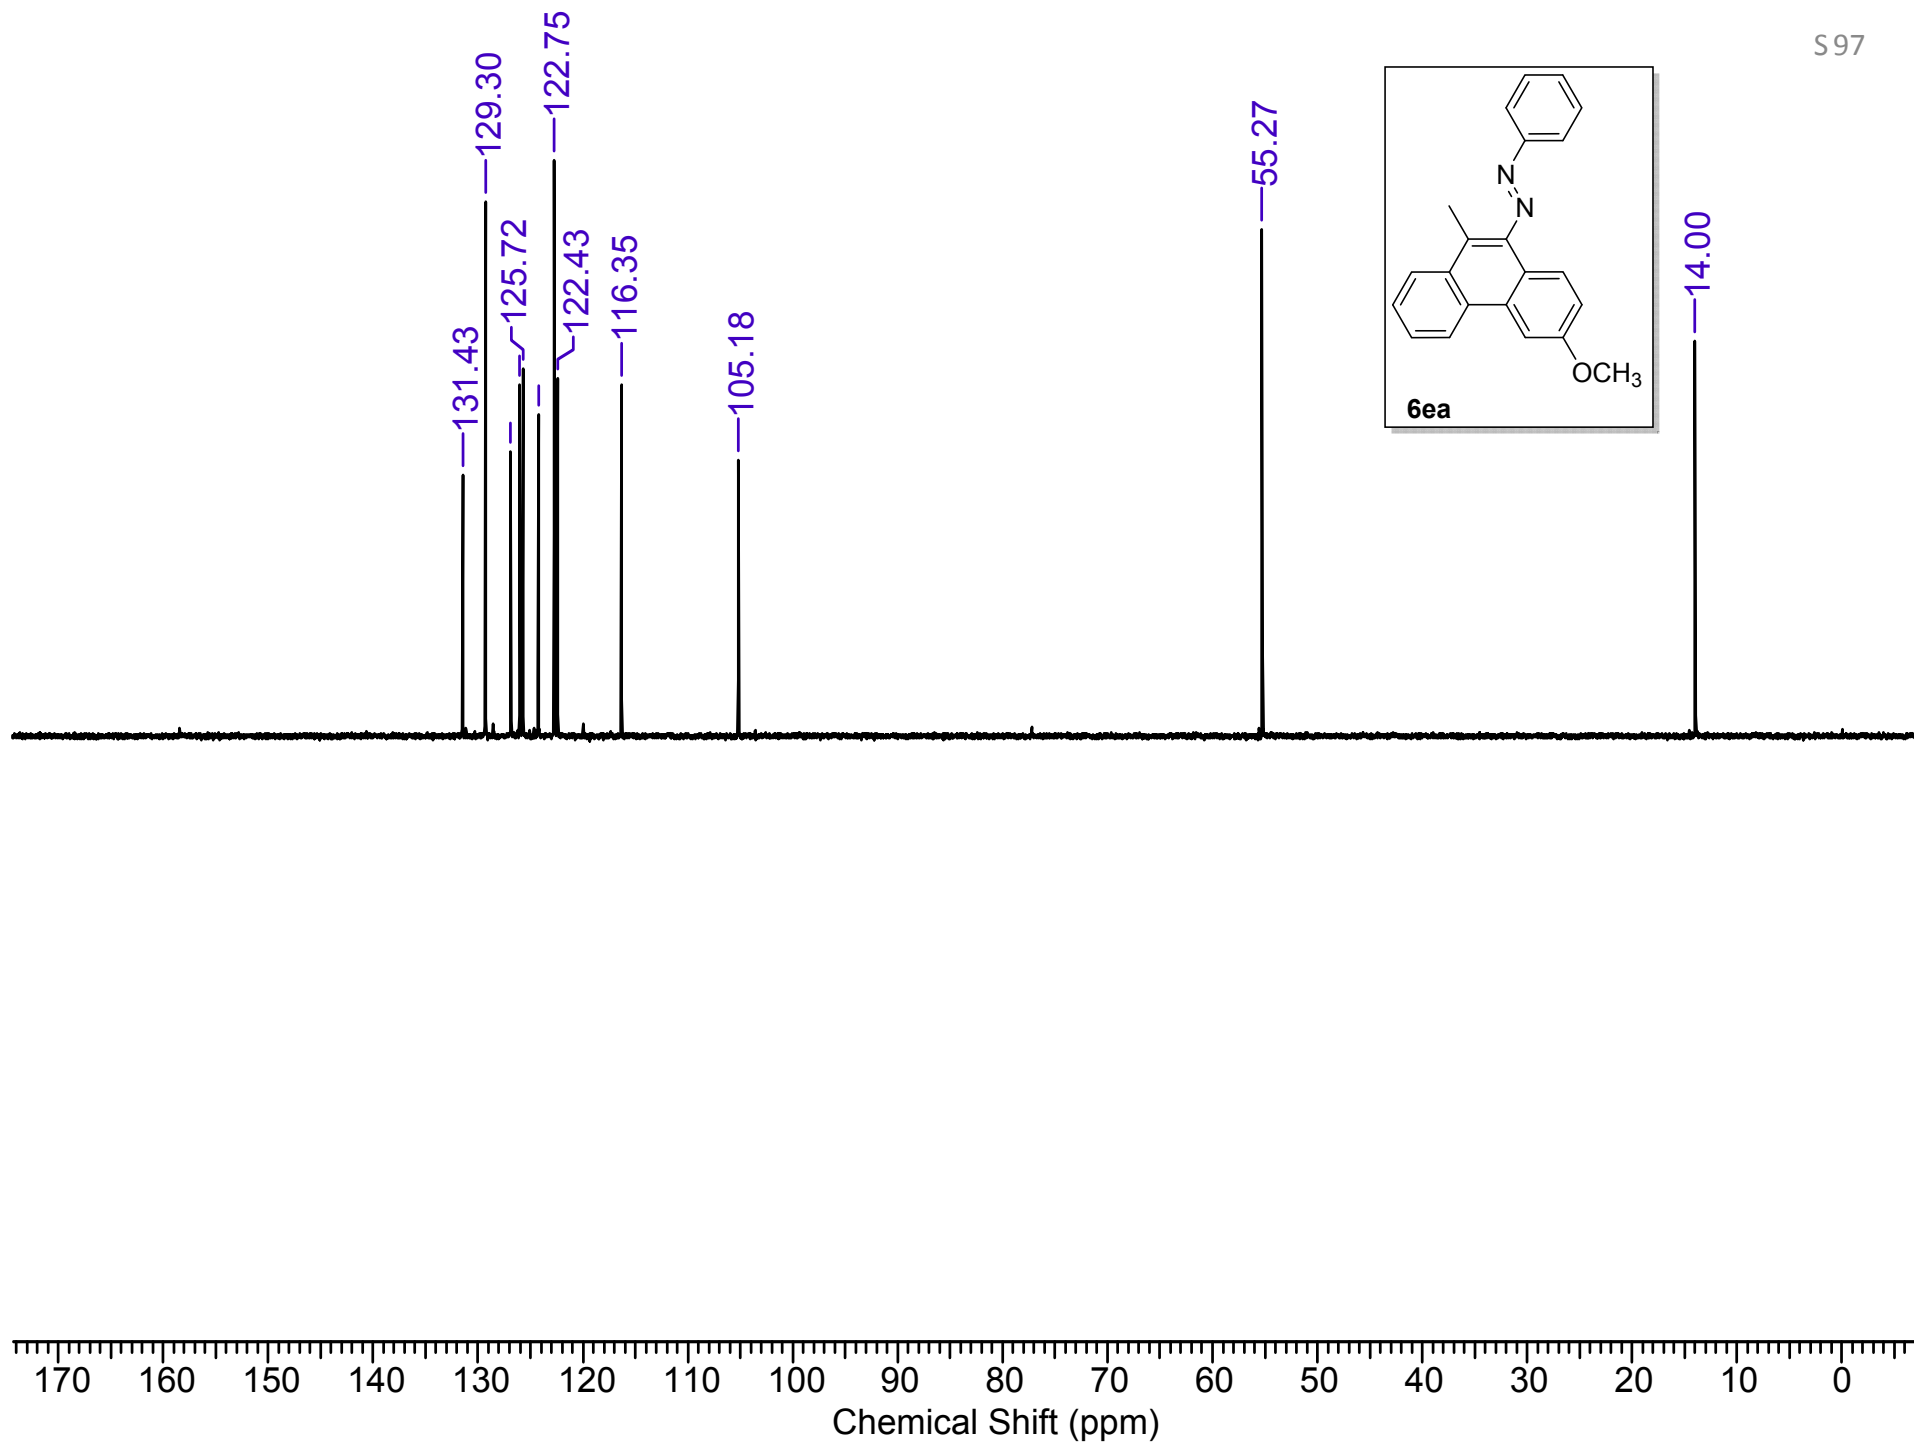

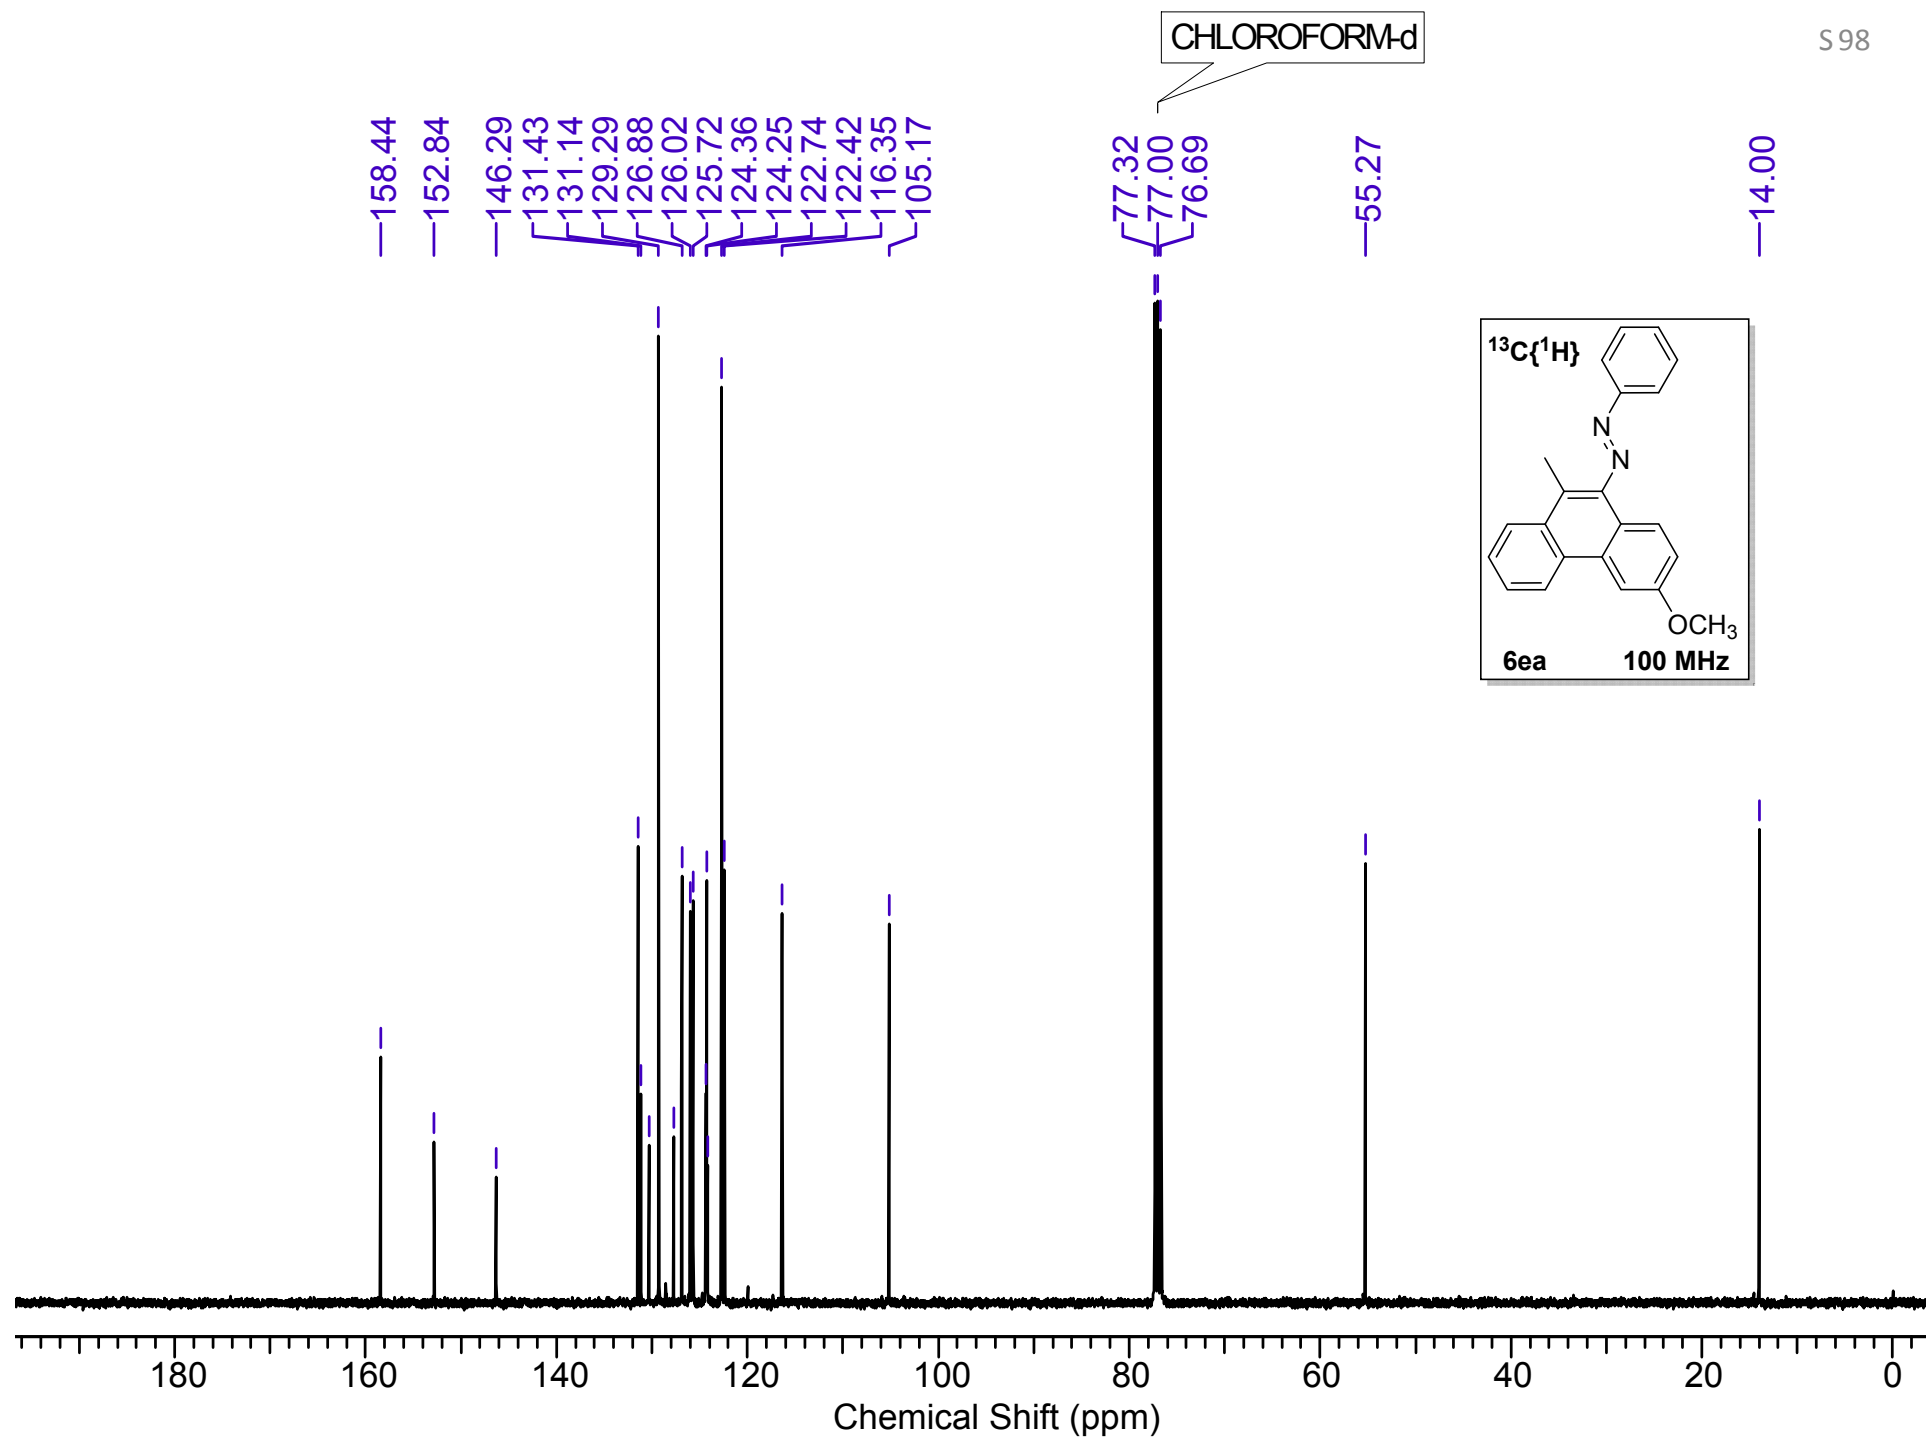

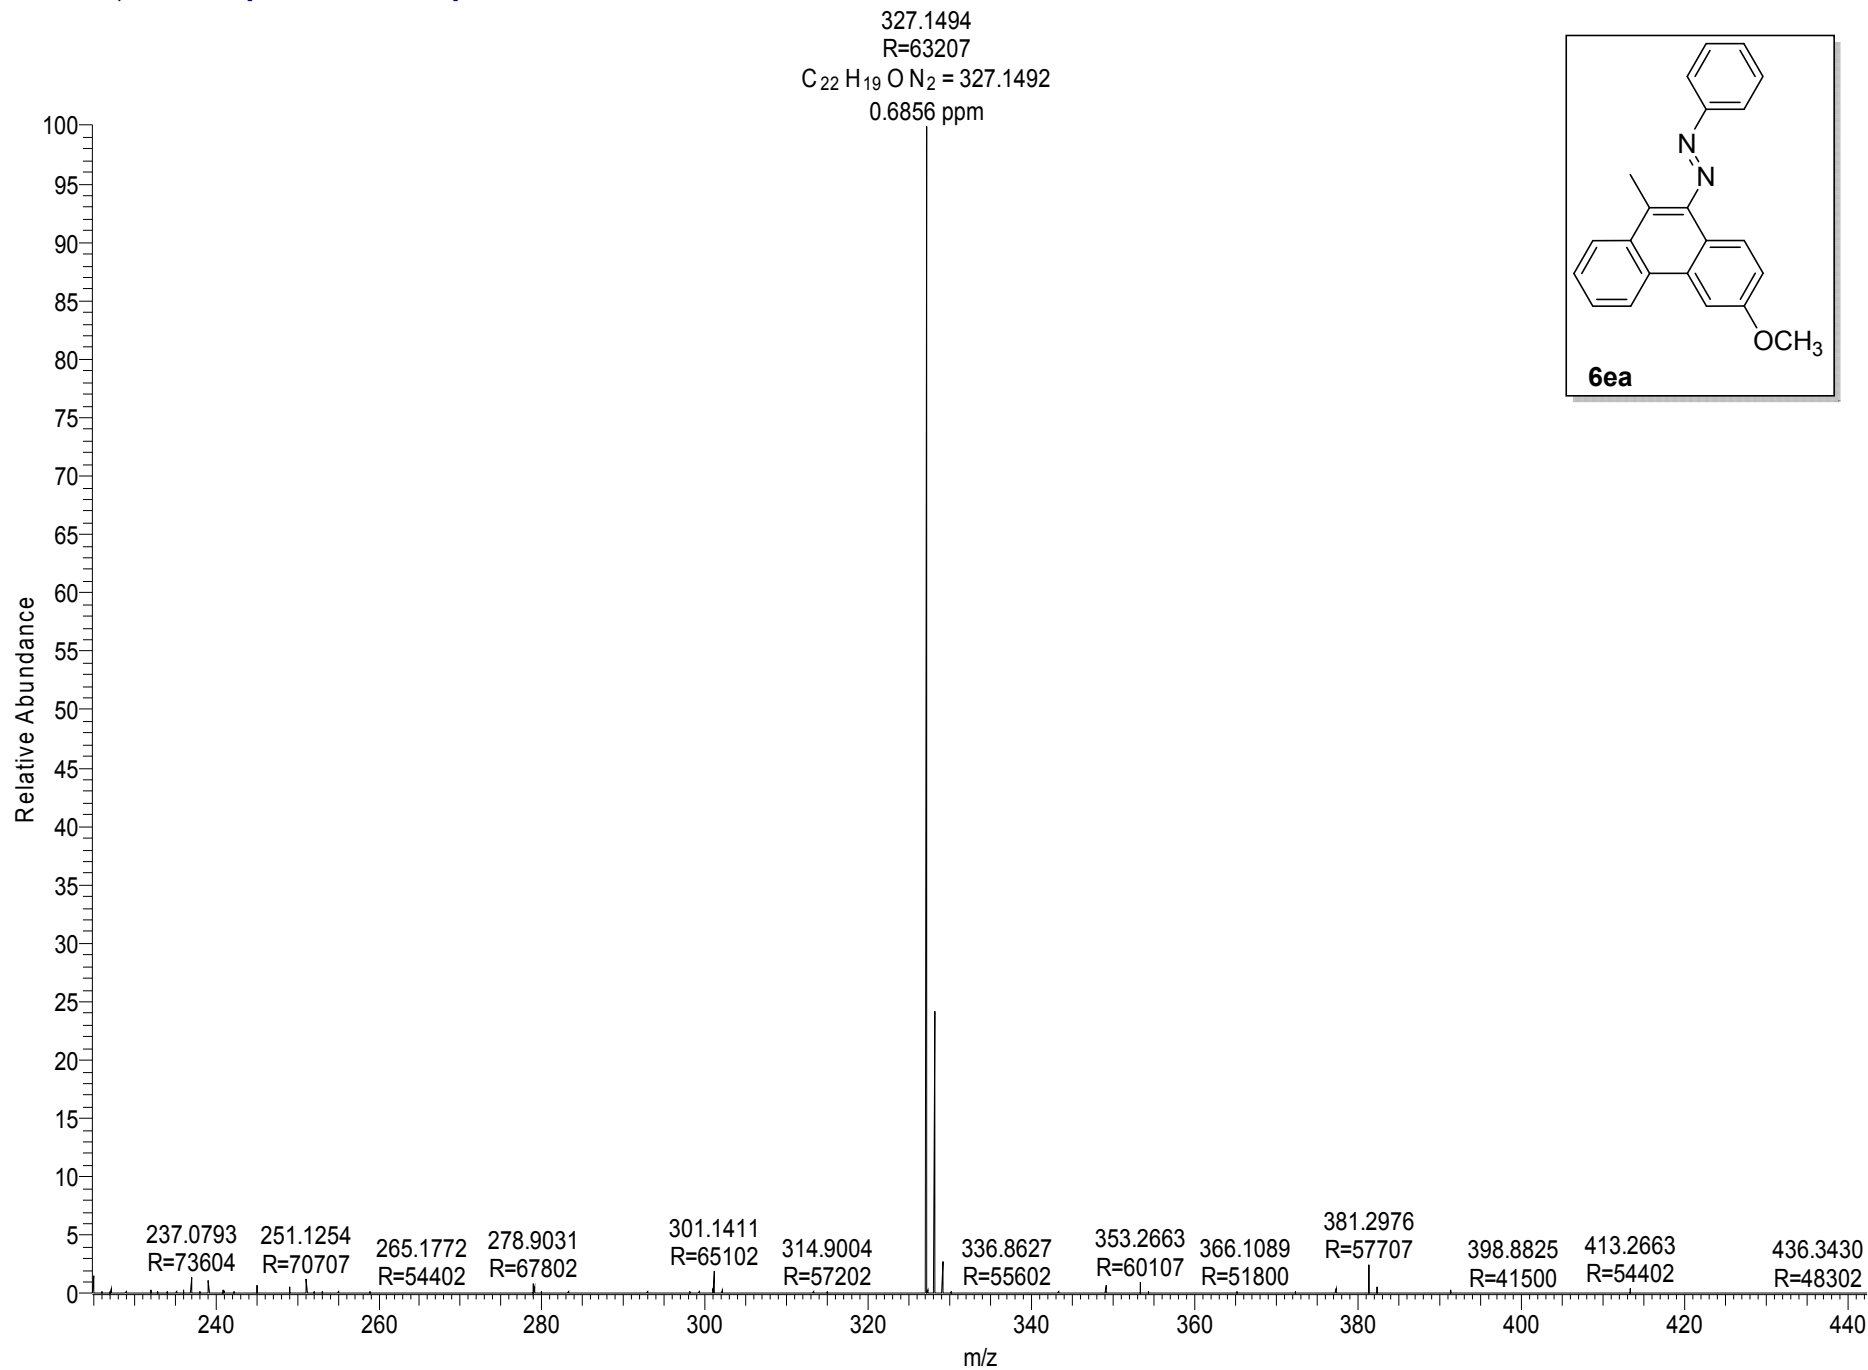

CHLOROFORM-d

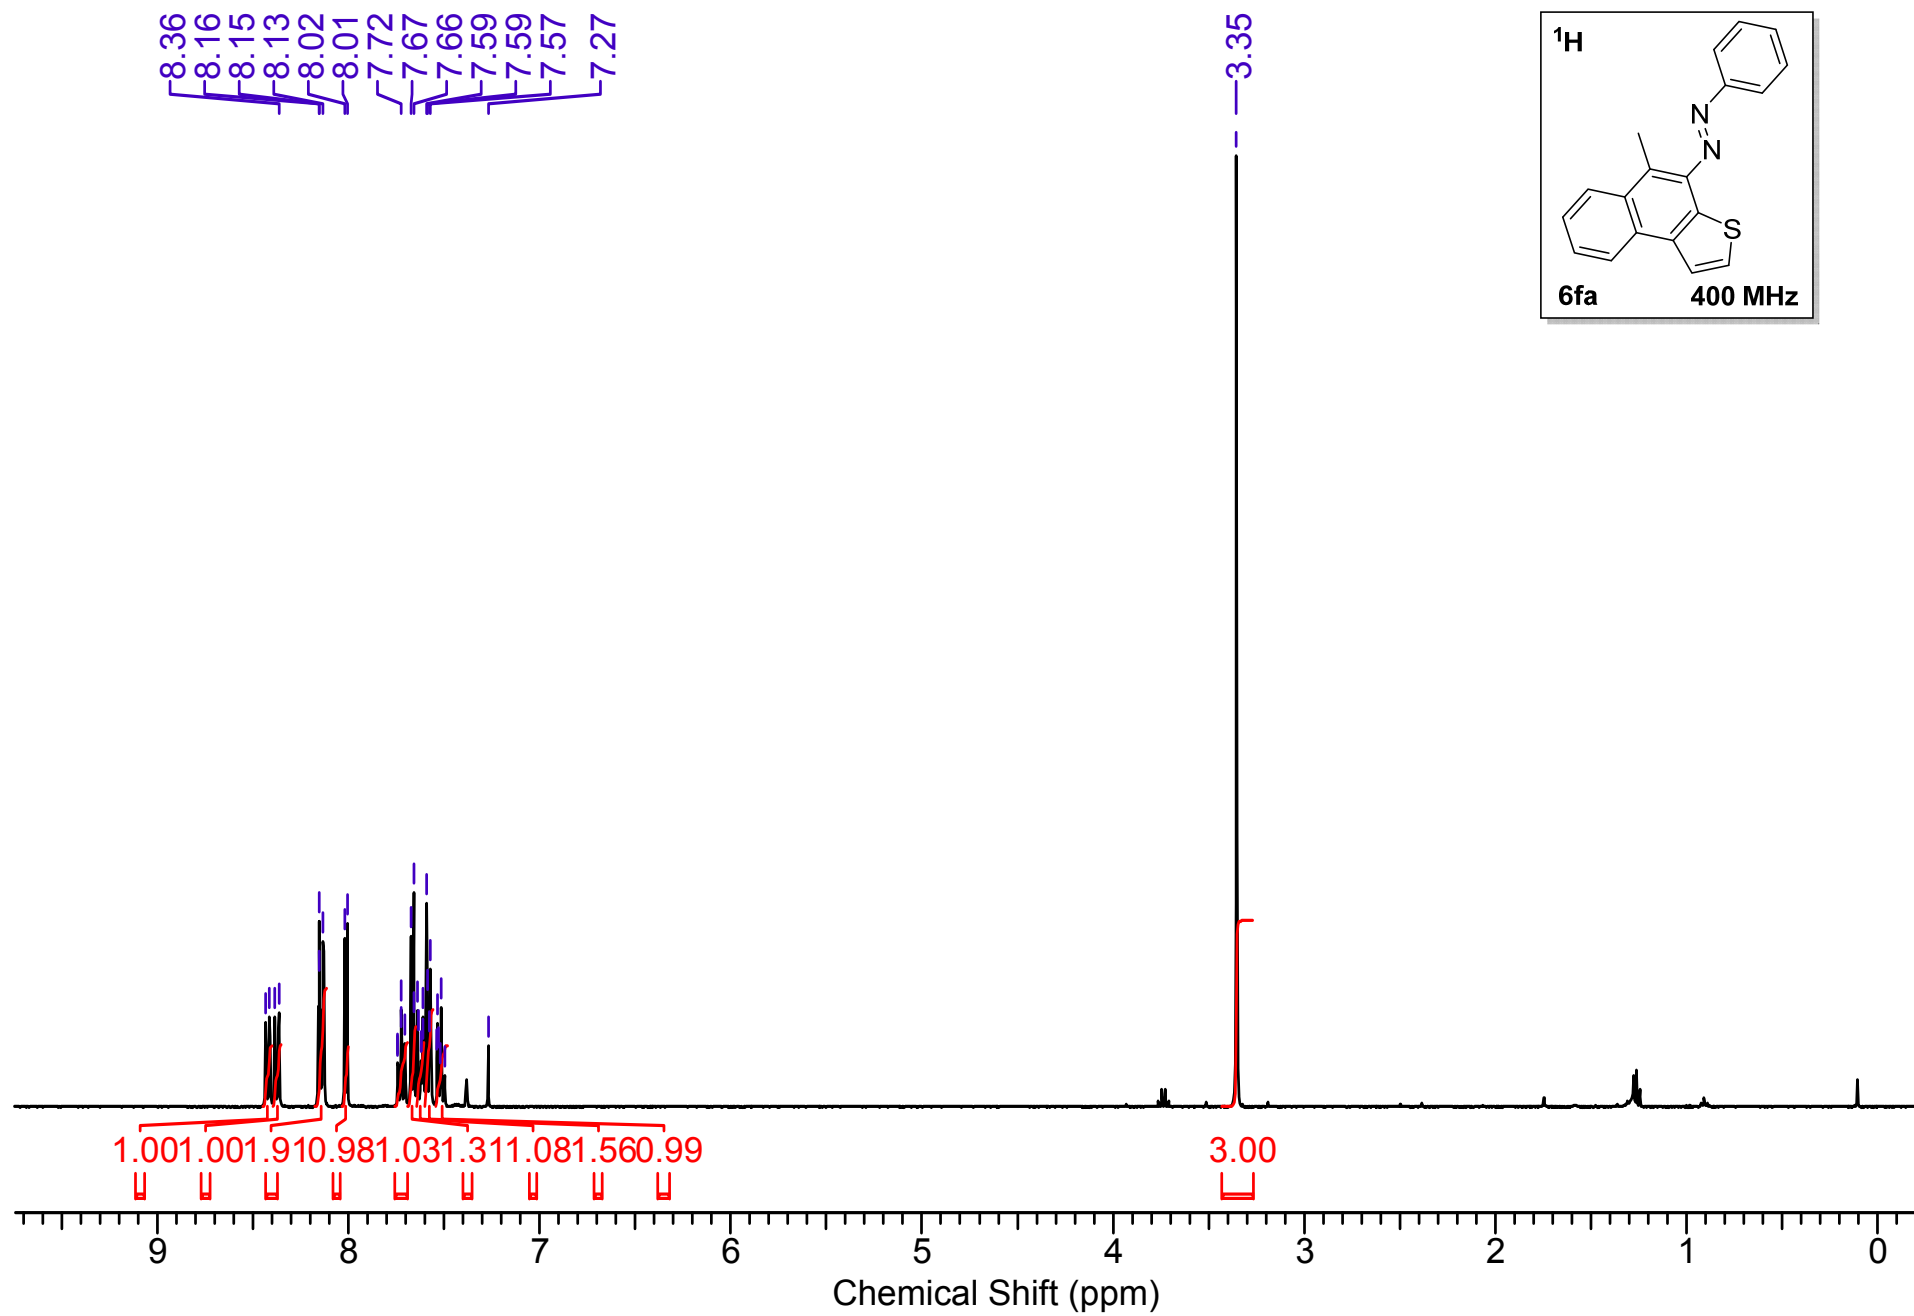

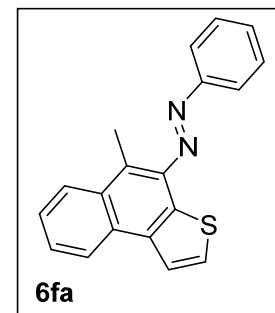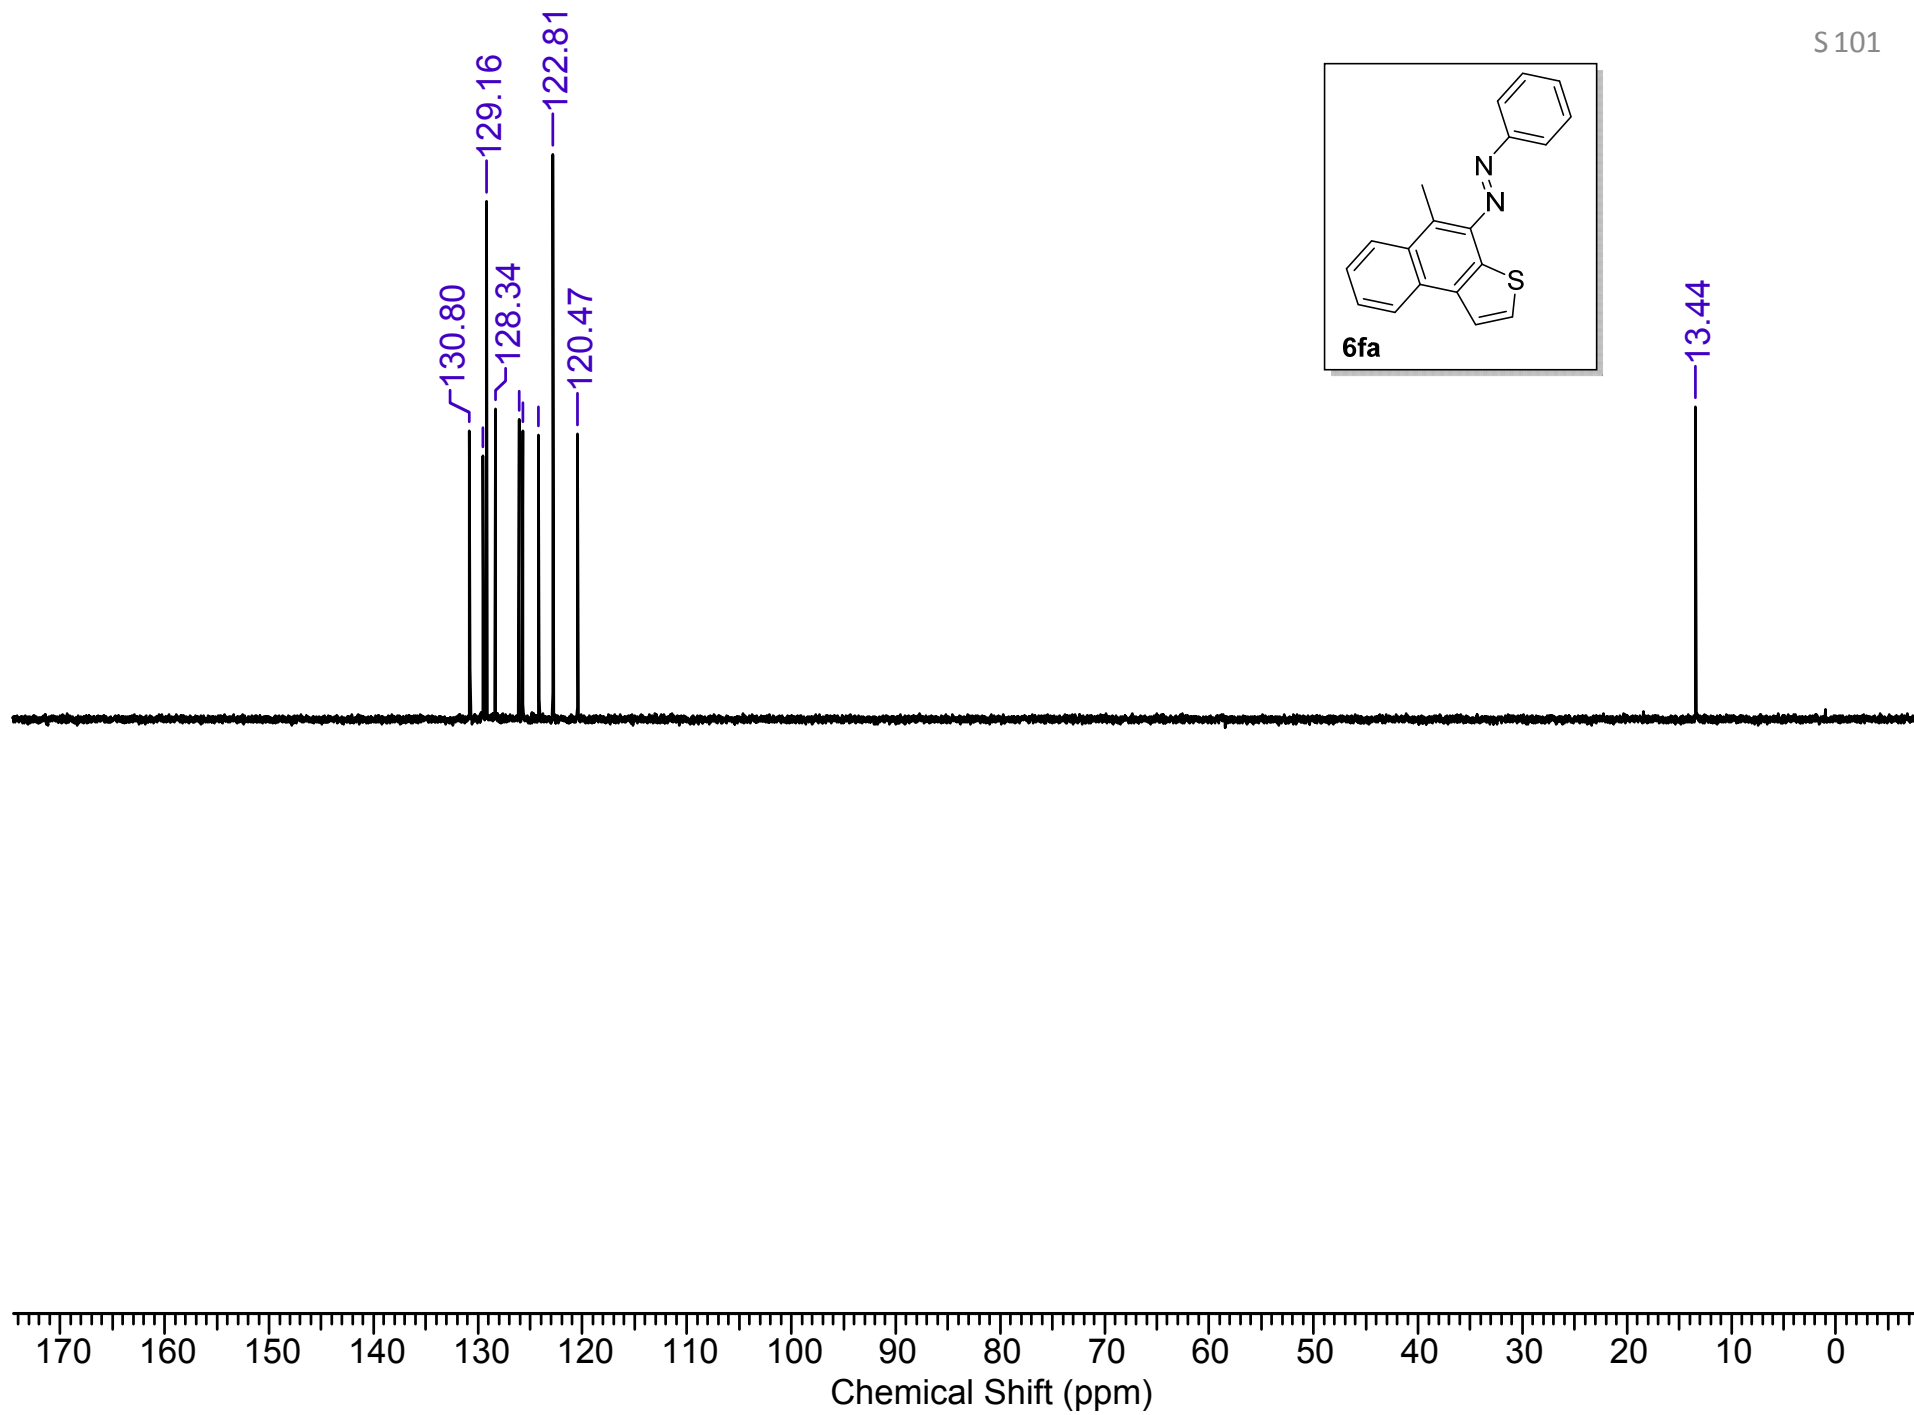

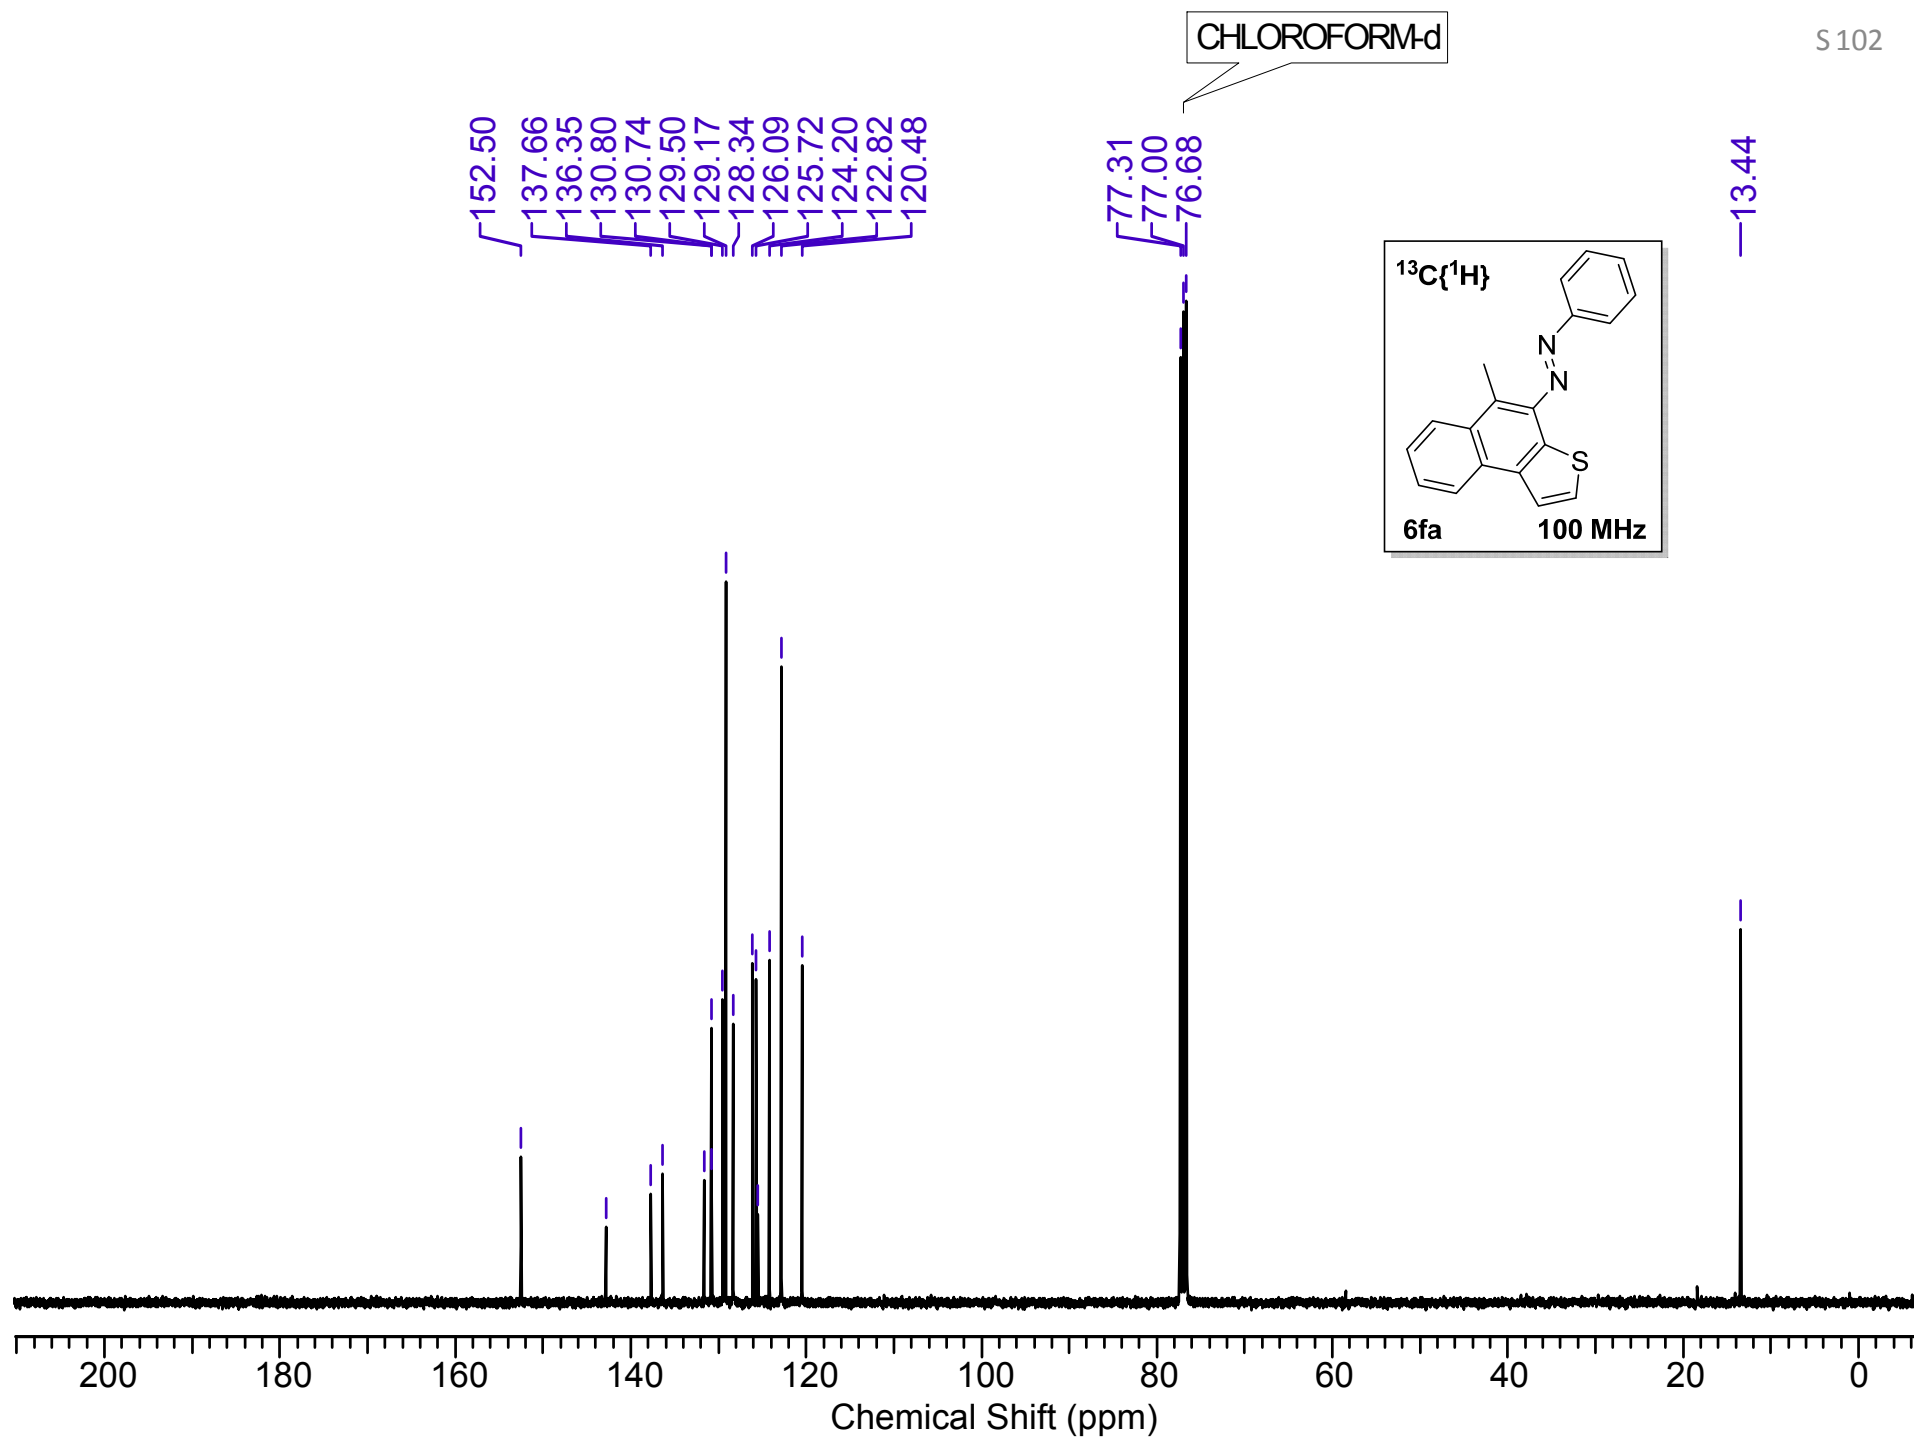

PSD 924

IISER PUNE

1: TOF MS ES+  
7.94e4PSD 924 201 (3.682) AM2 (Ar,20000.0,556.28,0.00,LS 3); Sm (SG,  
300.00)CALCULATED MASS  
(M+H)+ 303.0956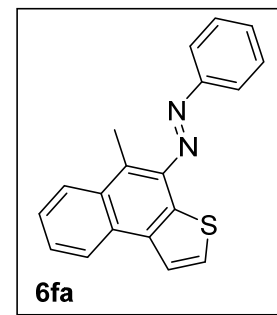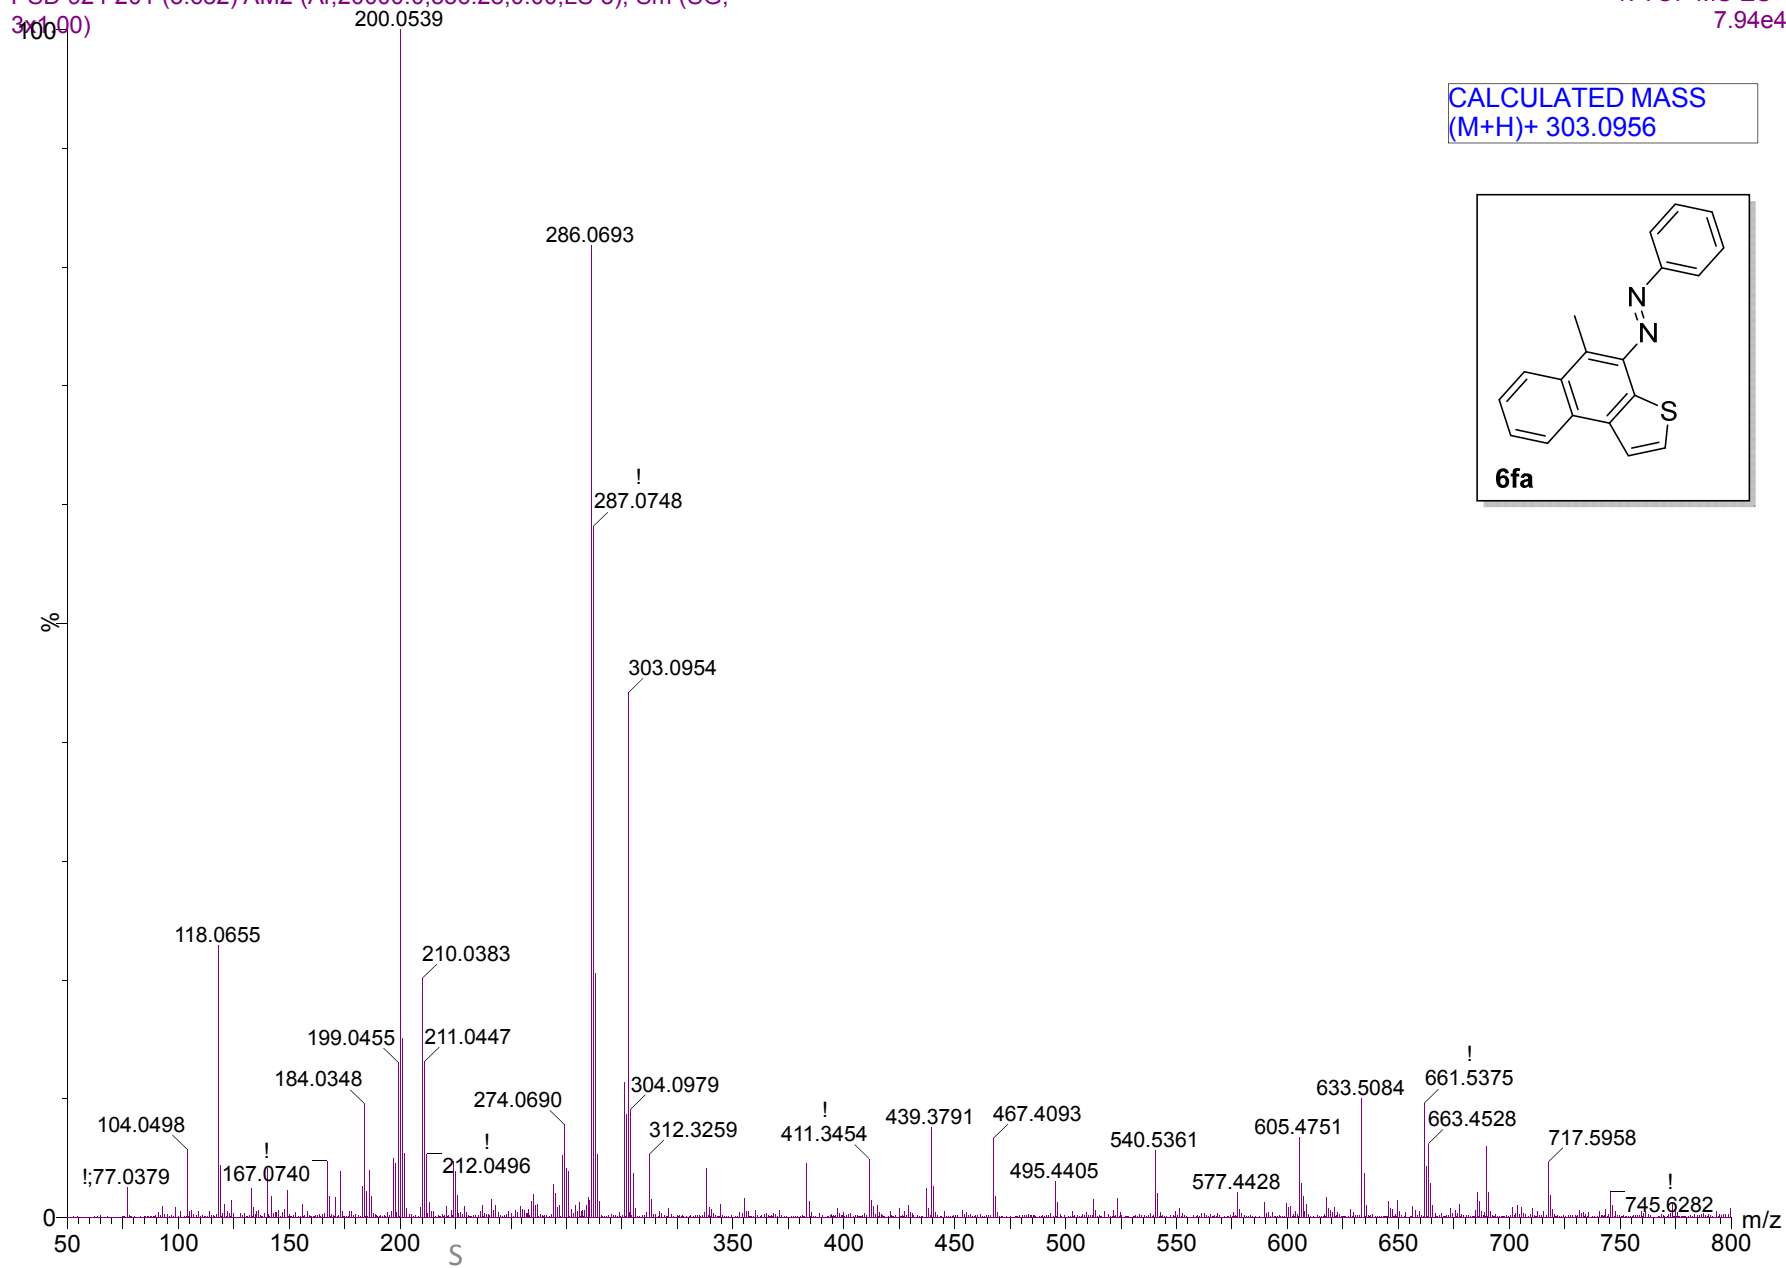

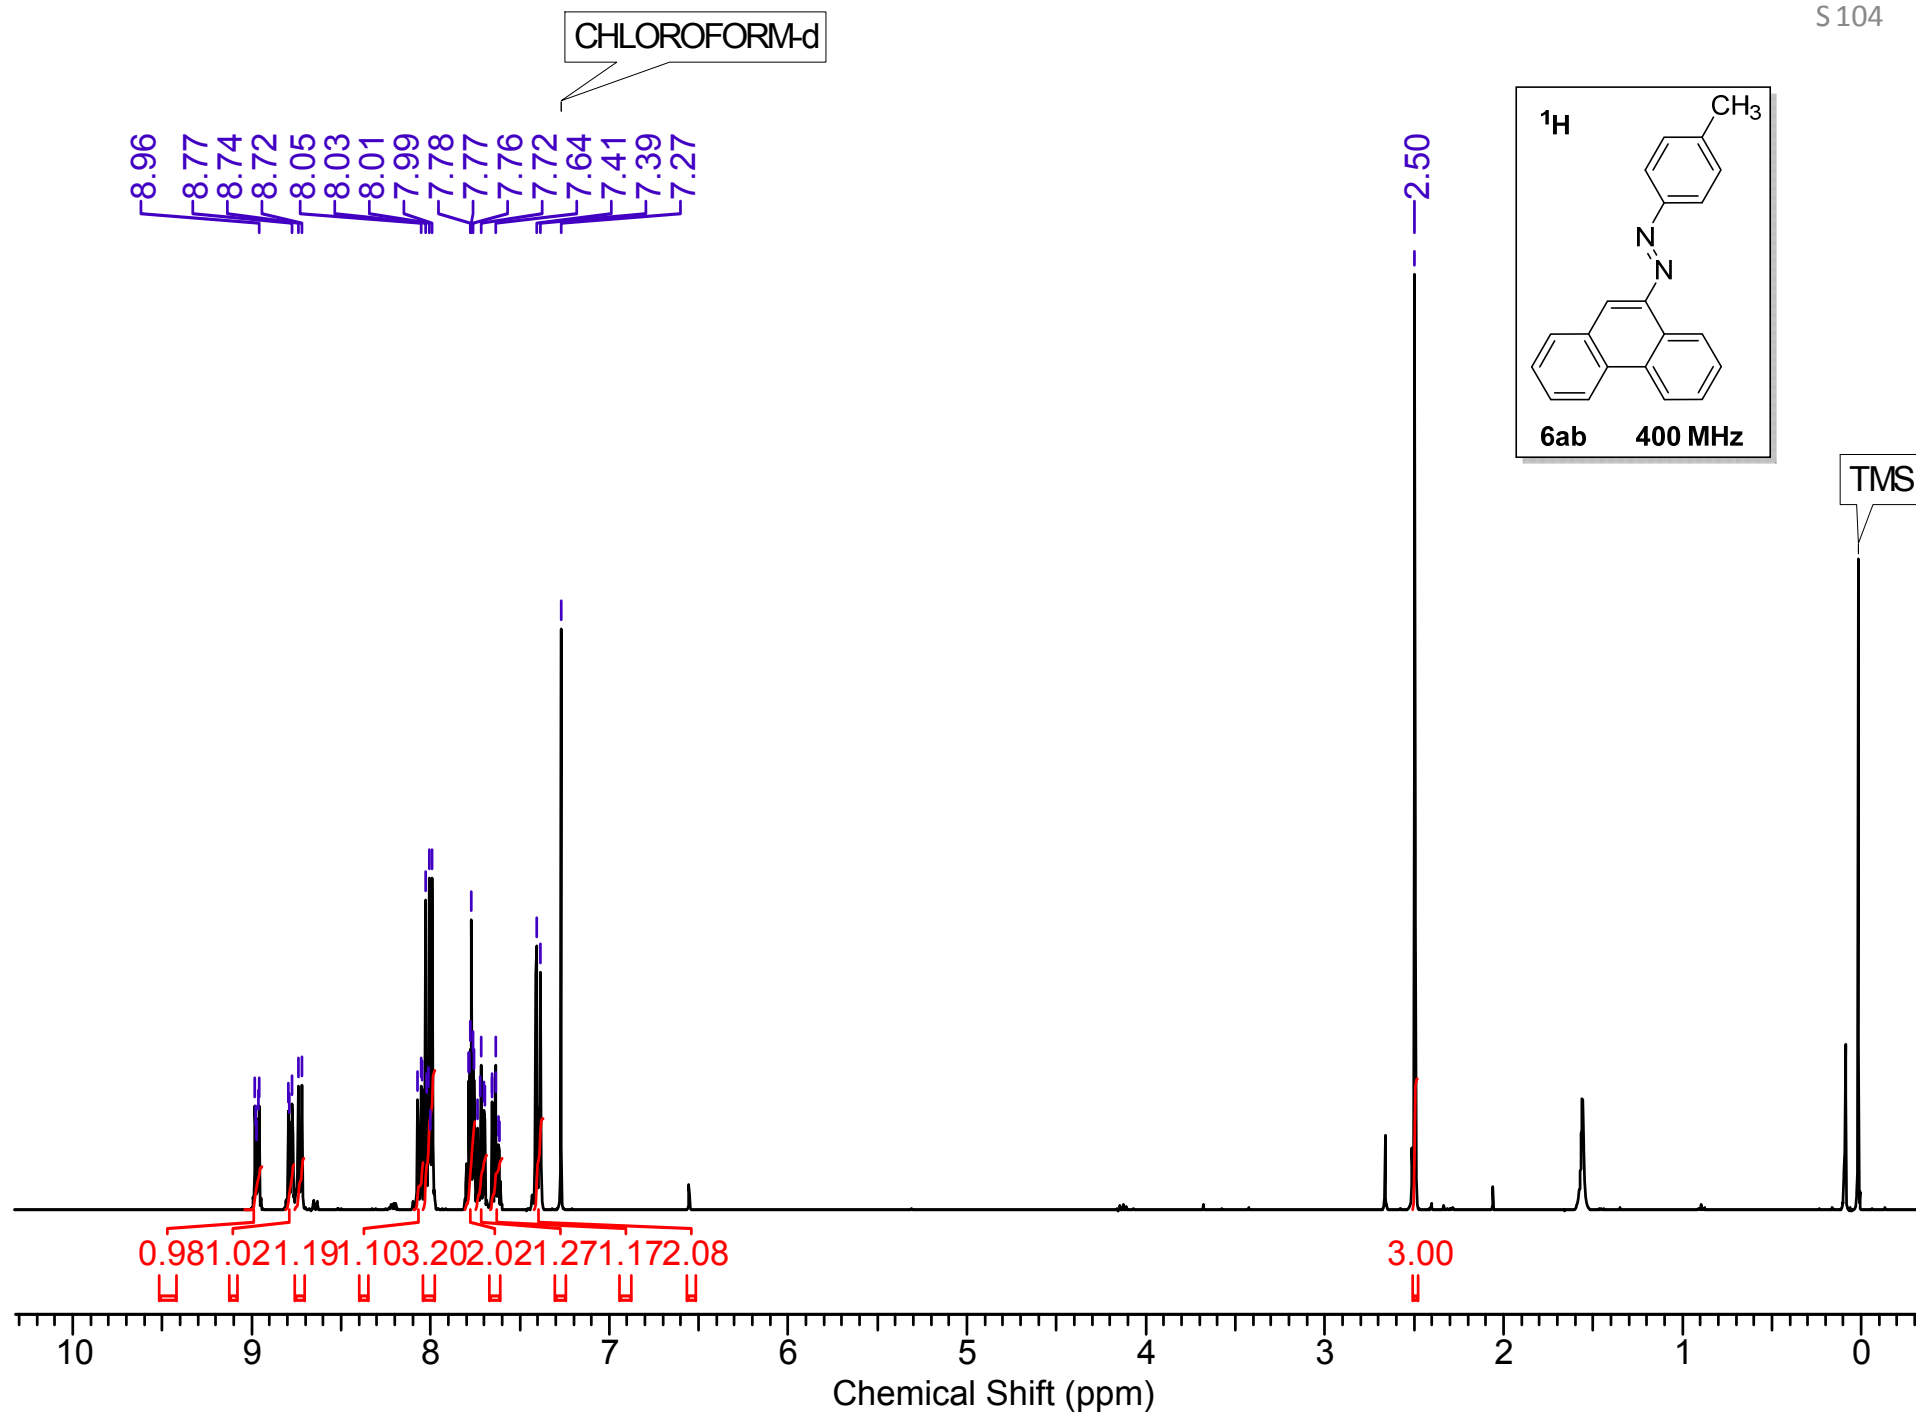



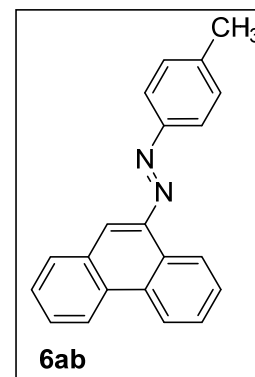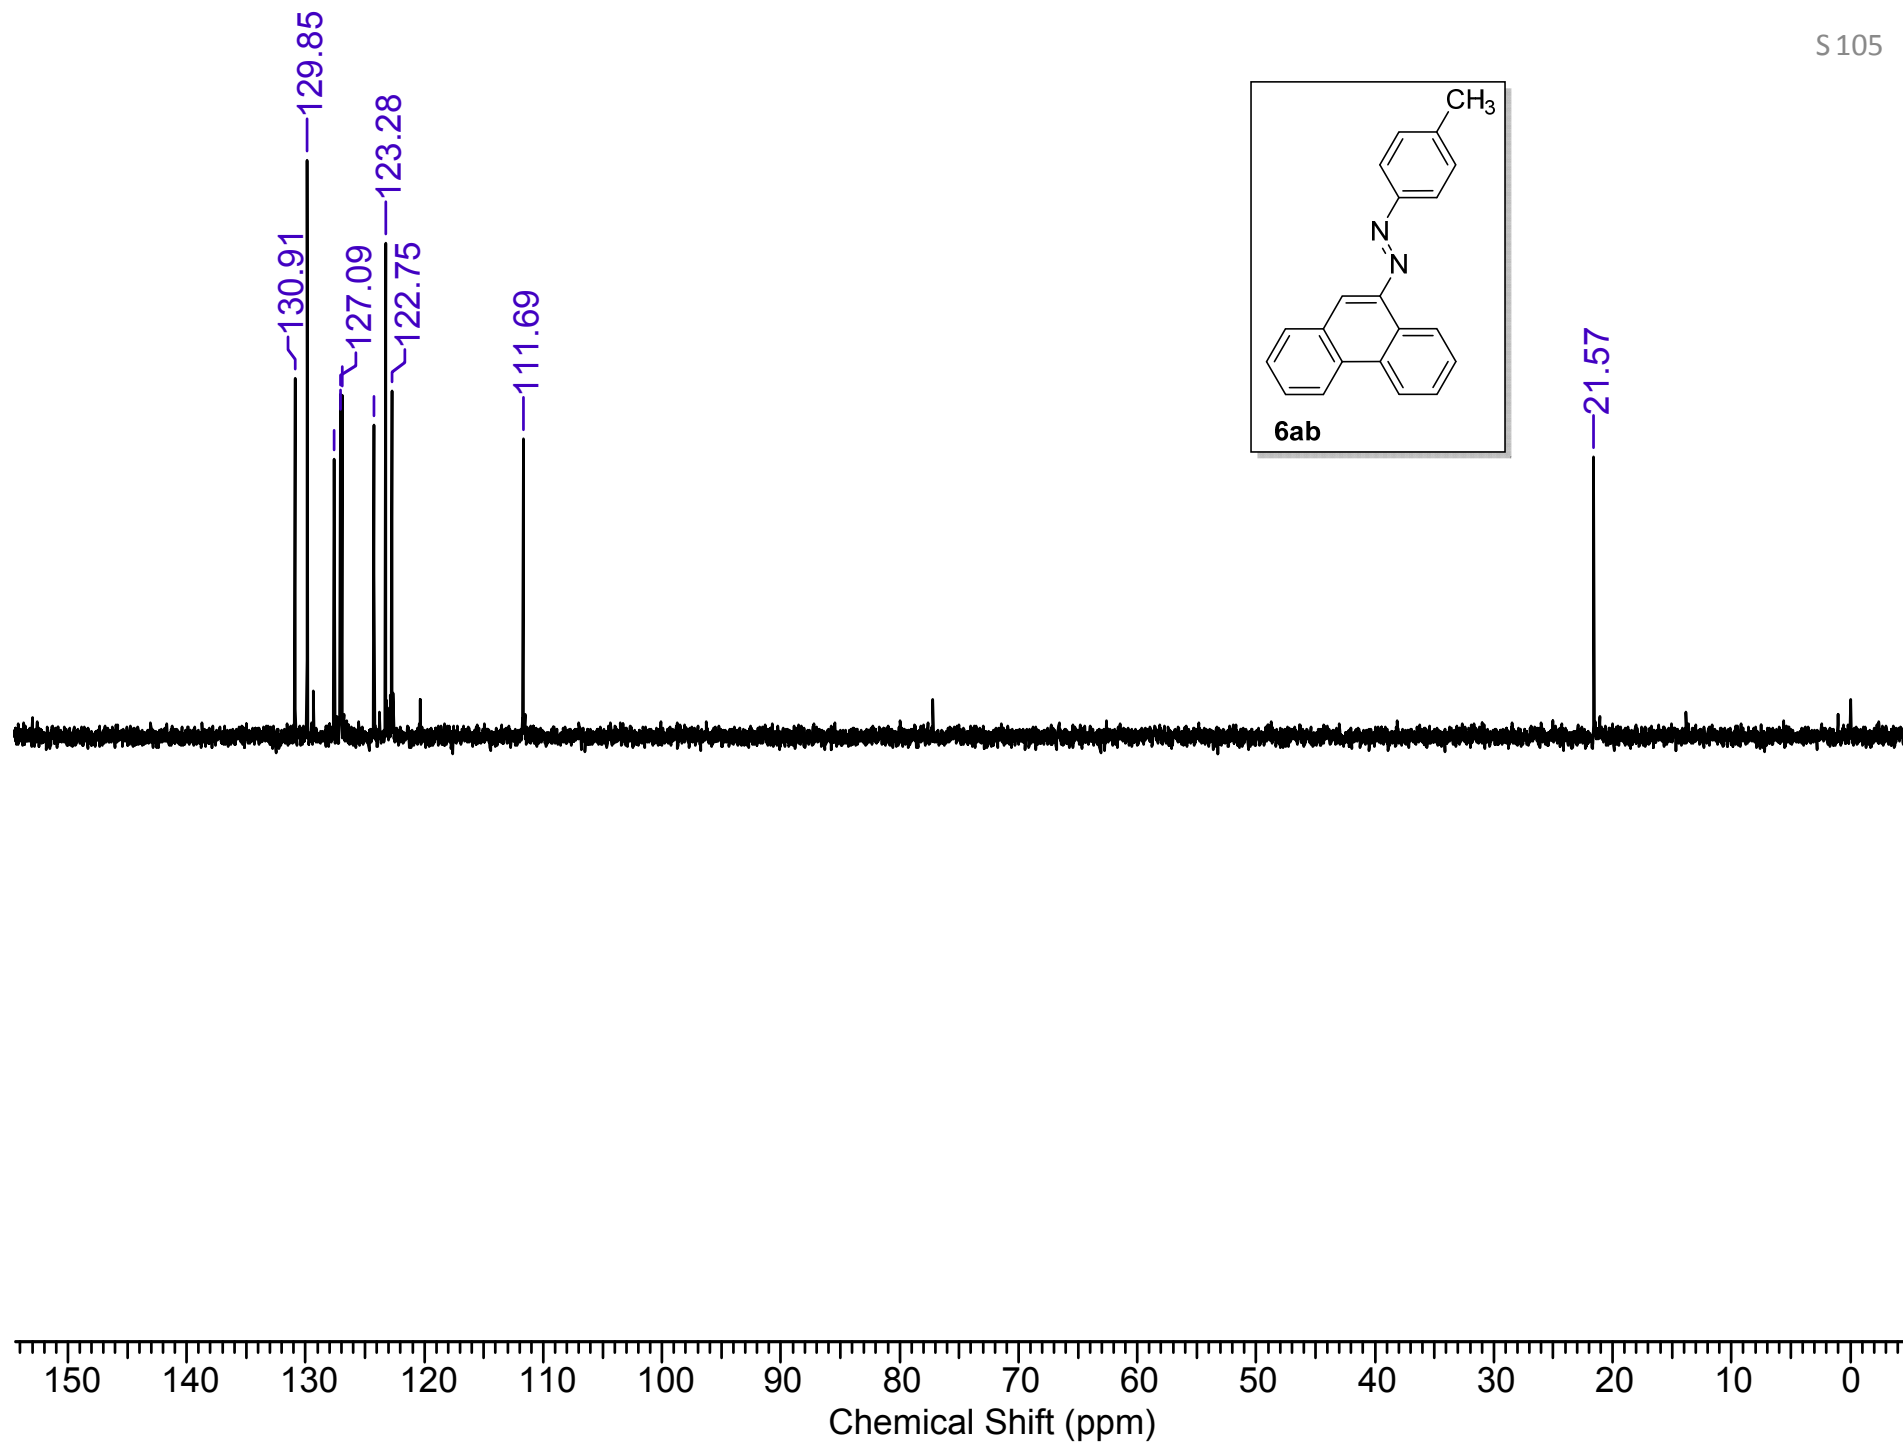

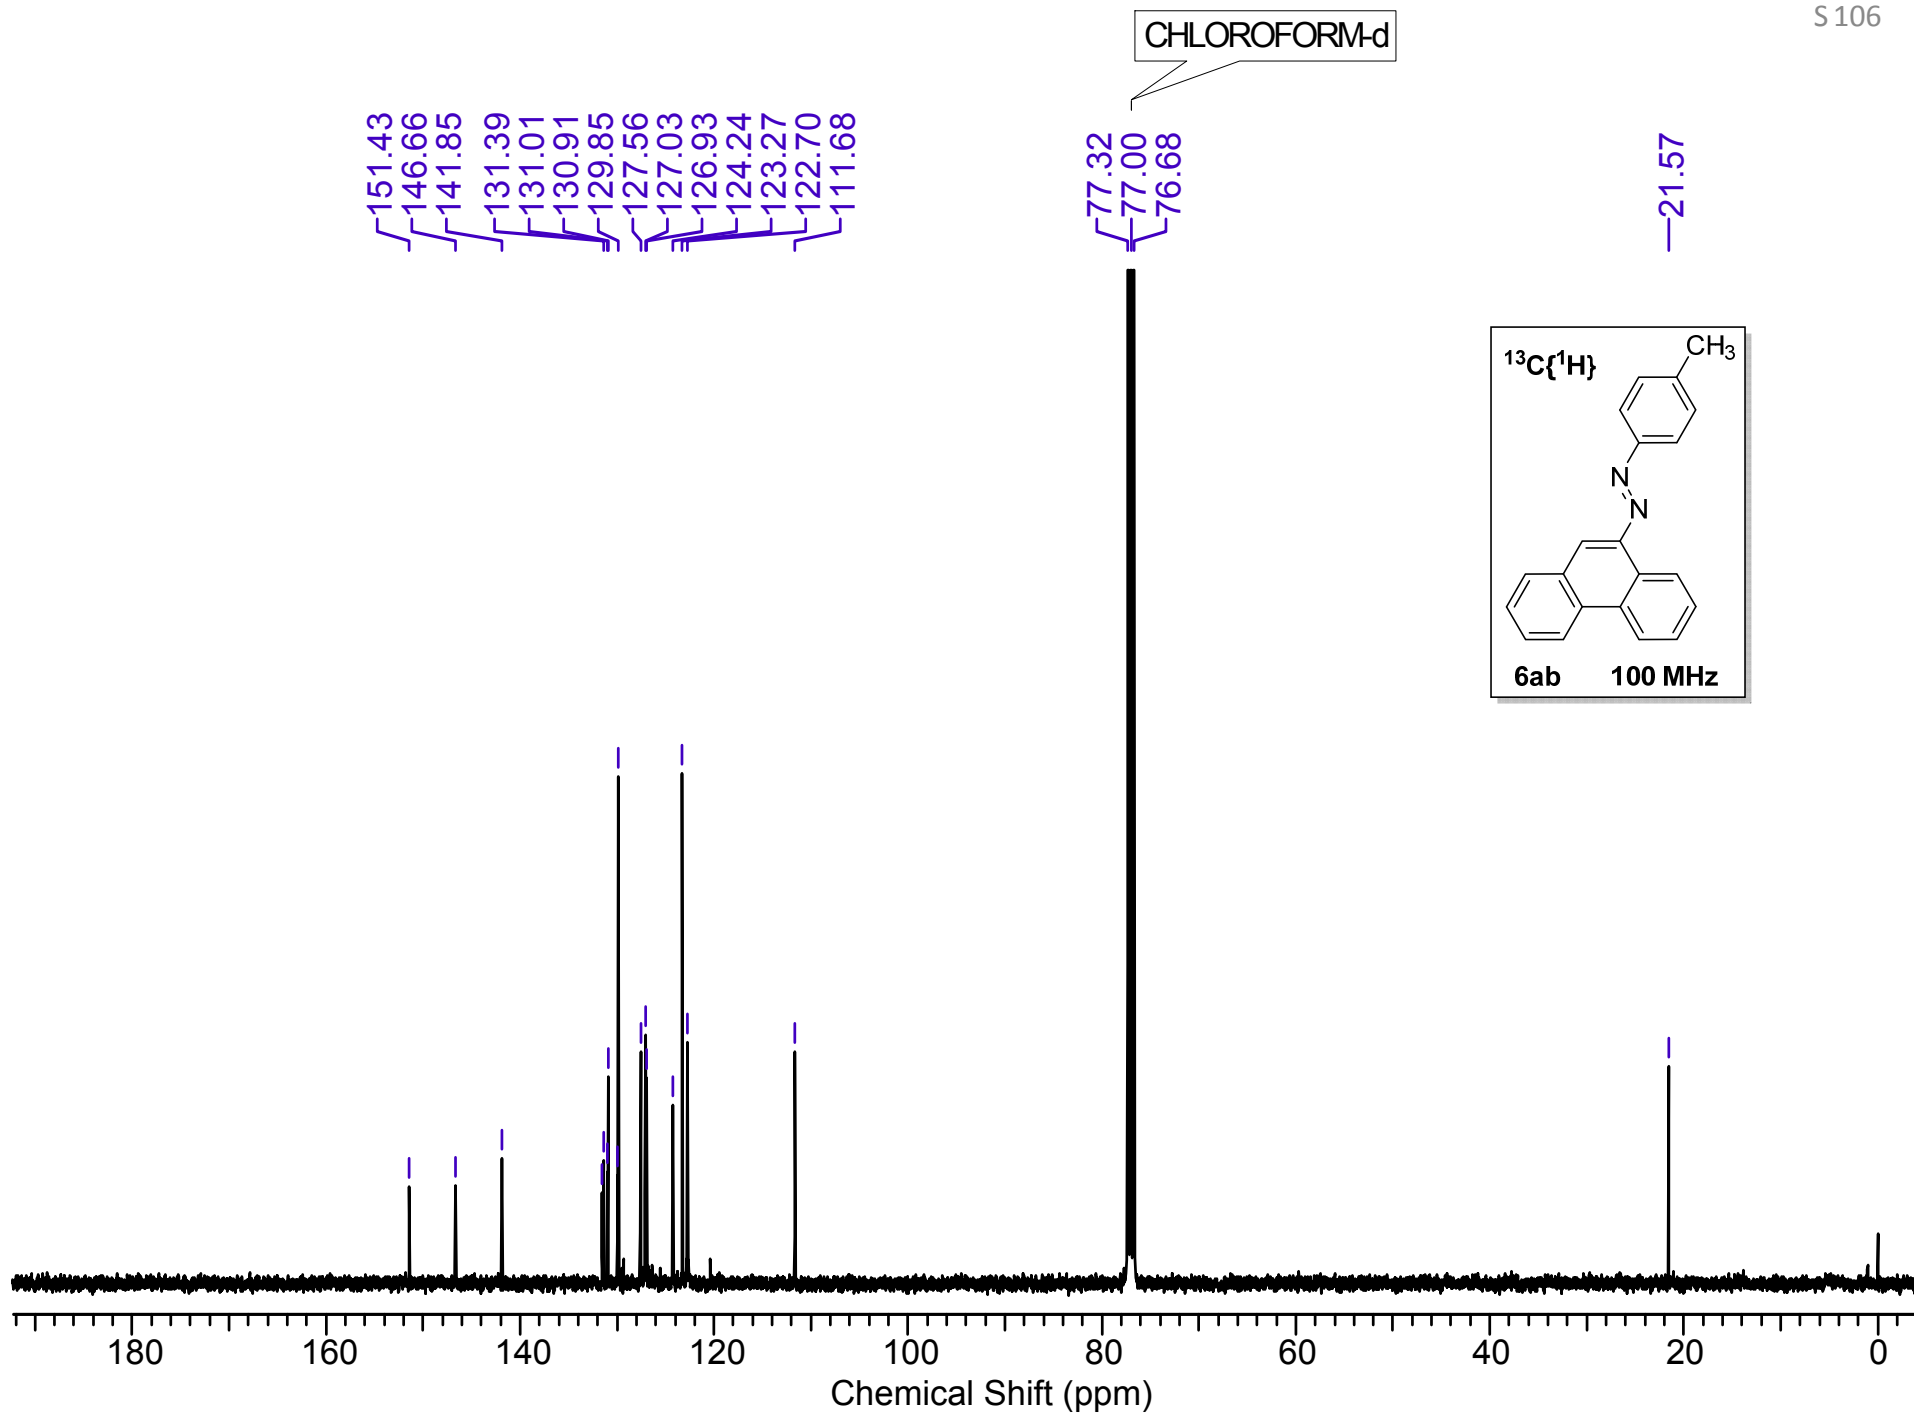

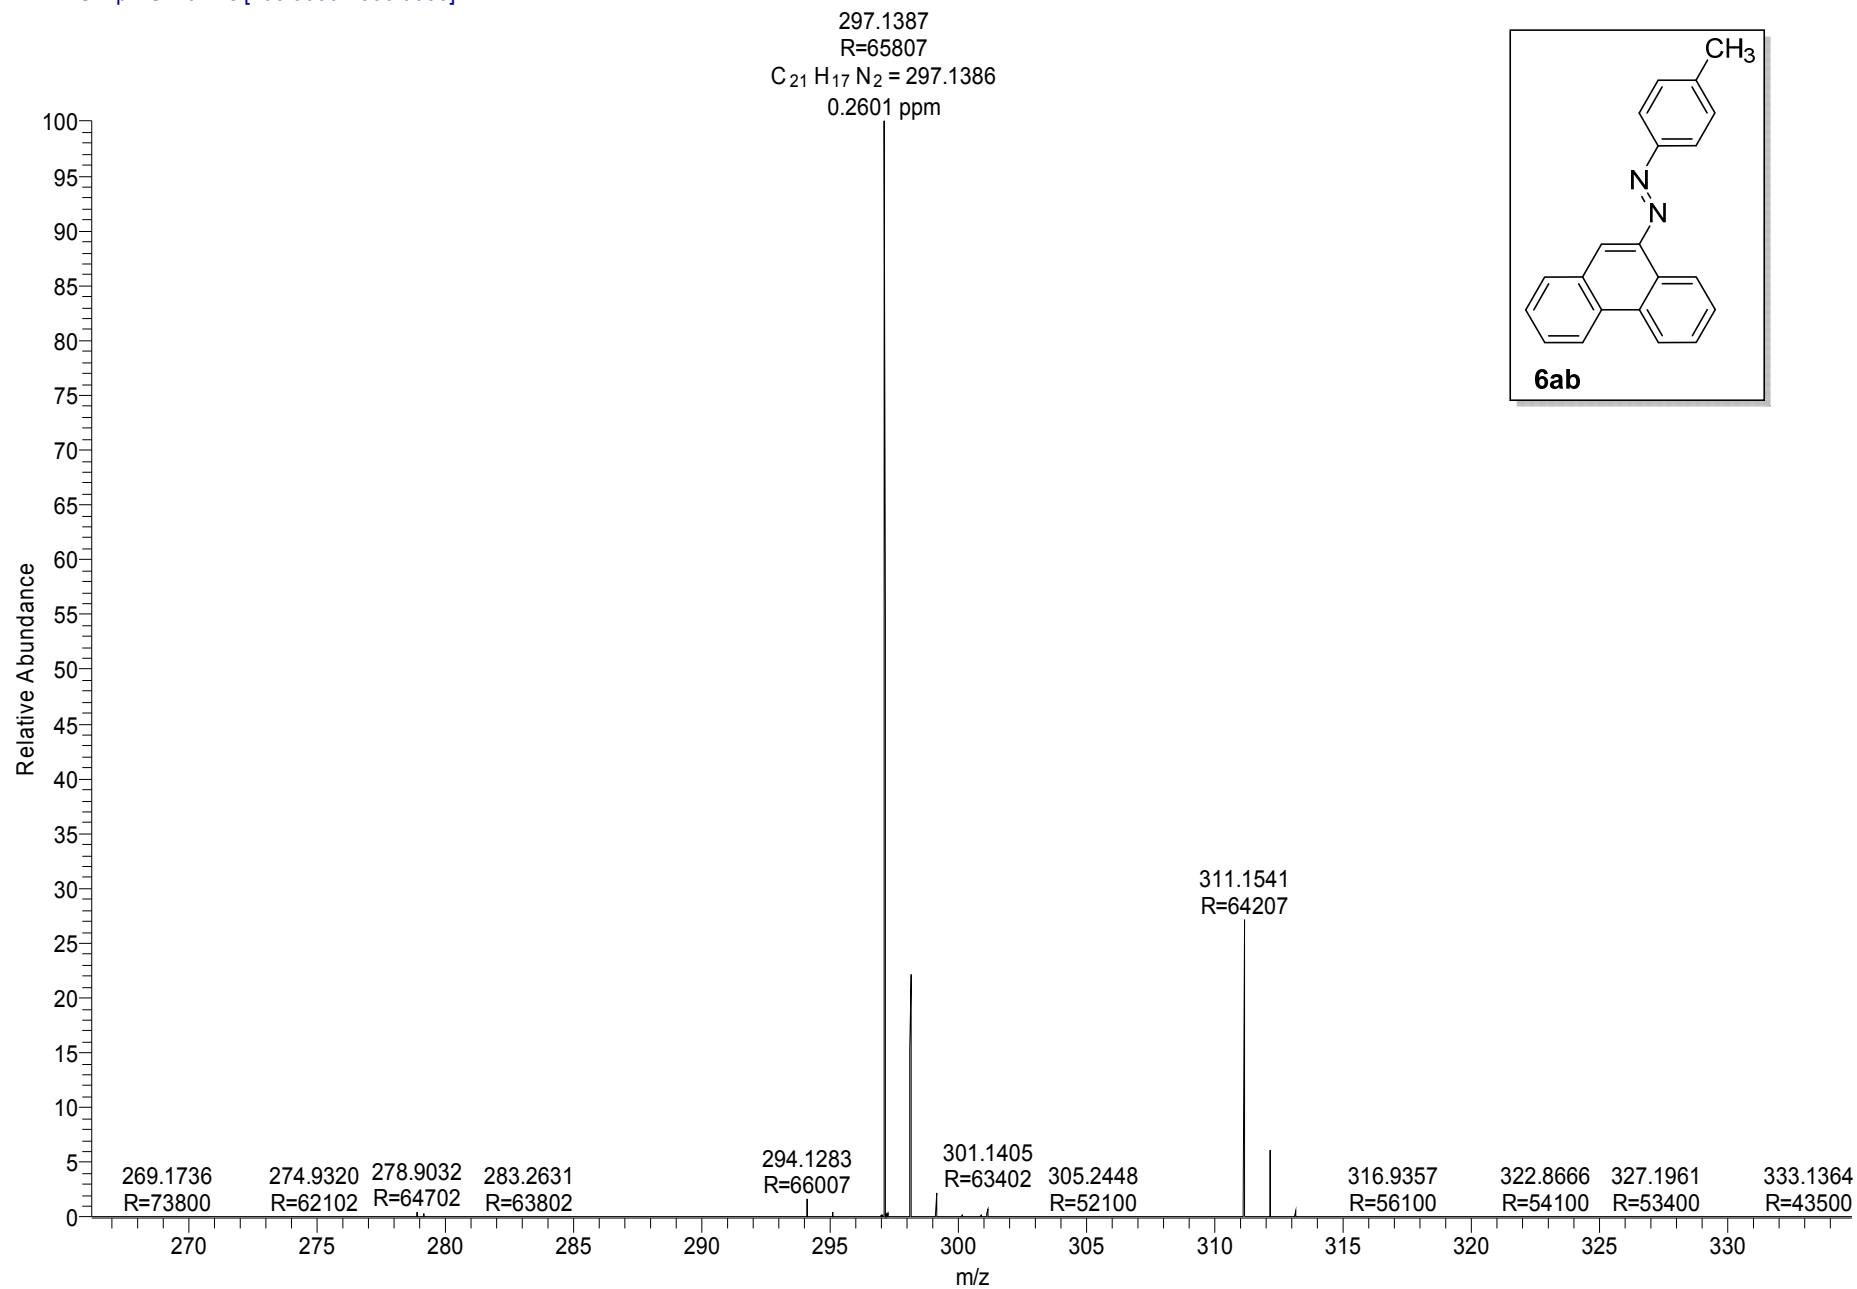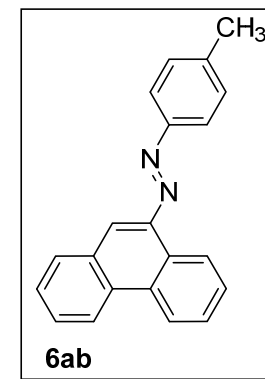

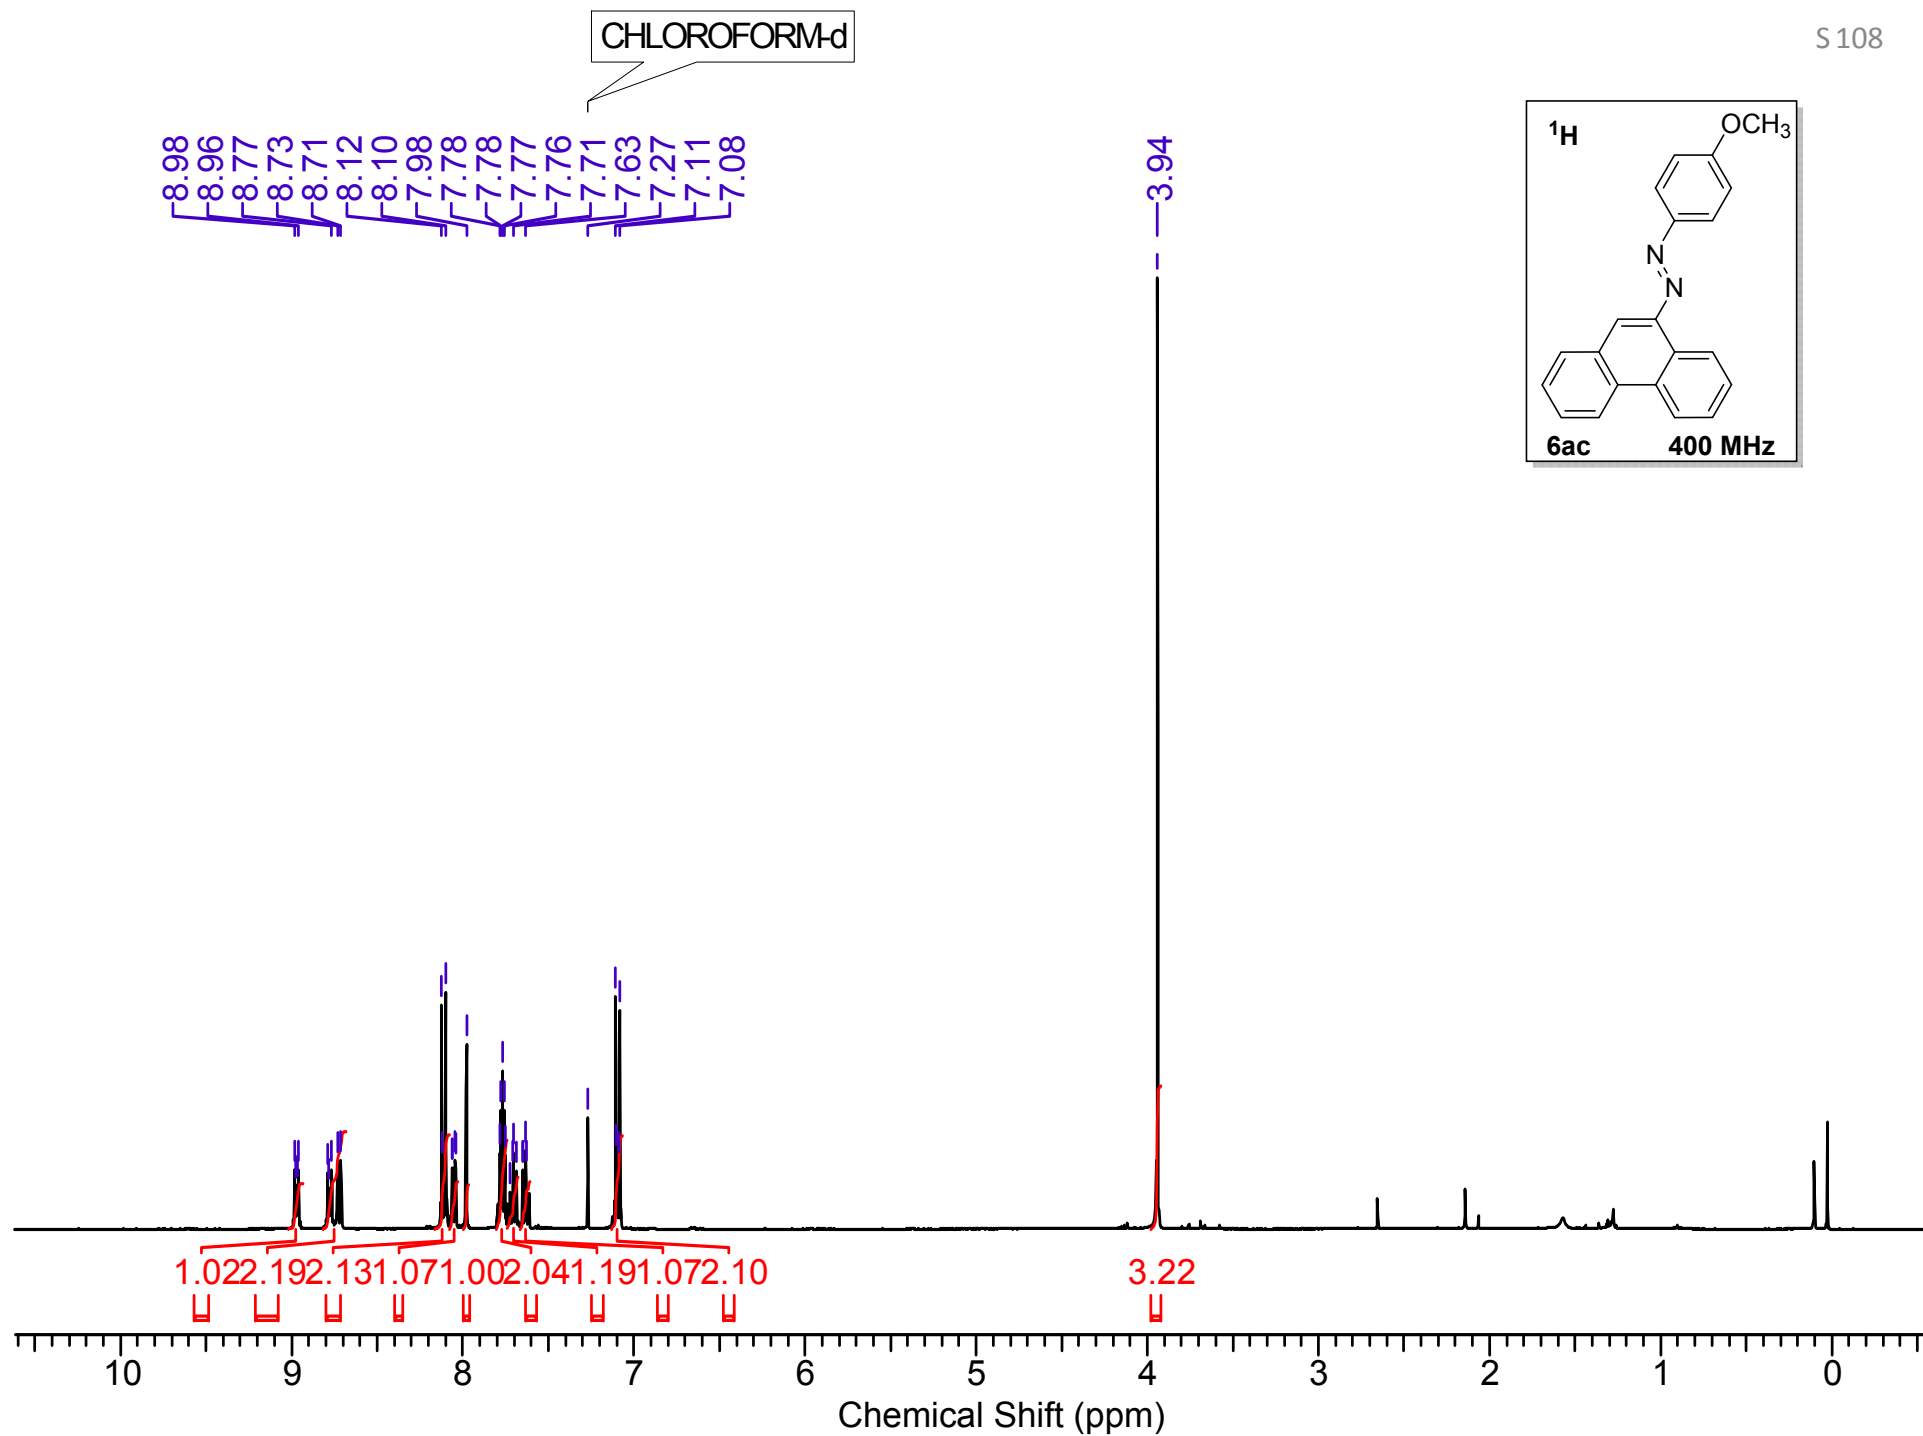

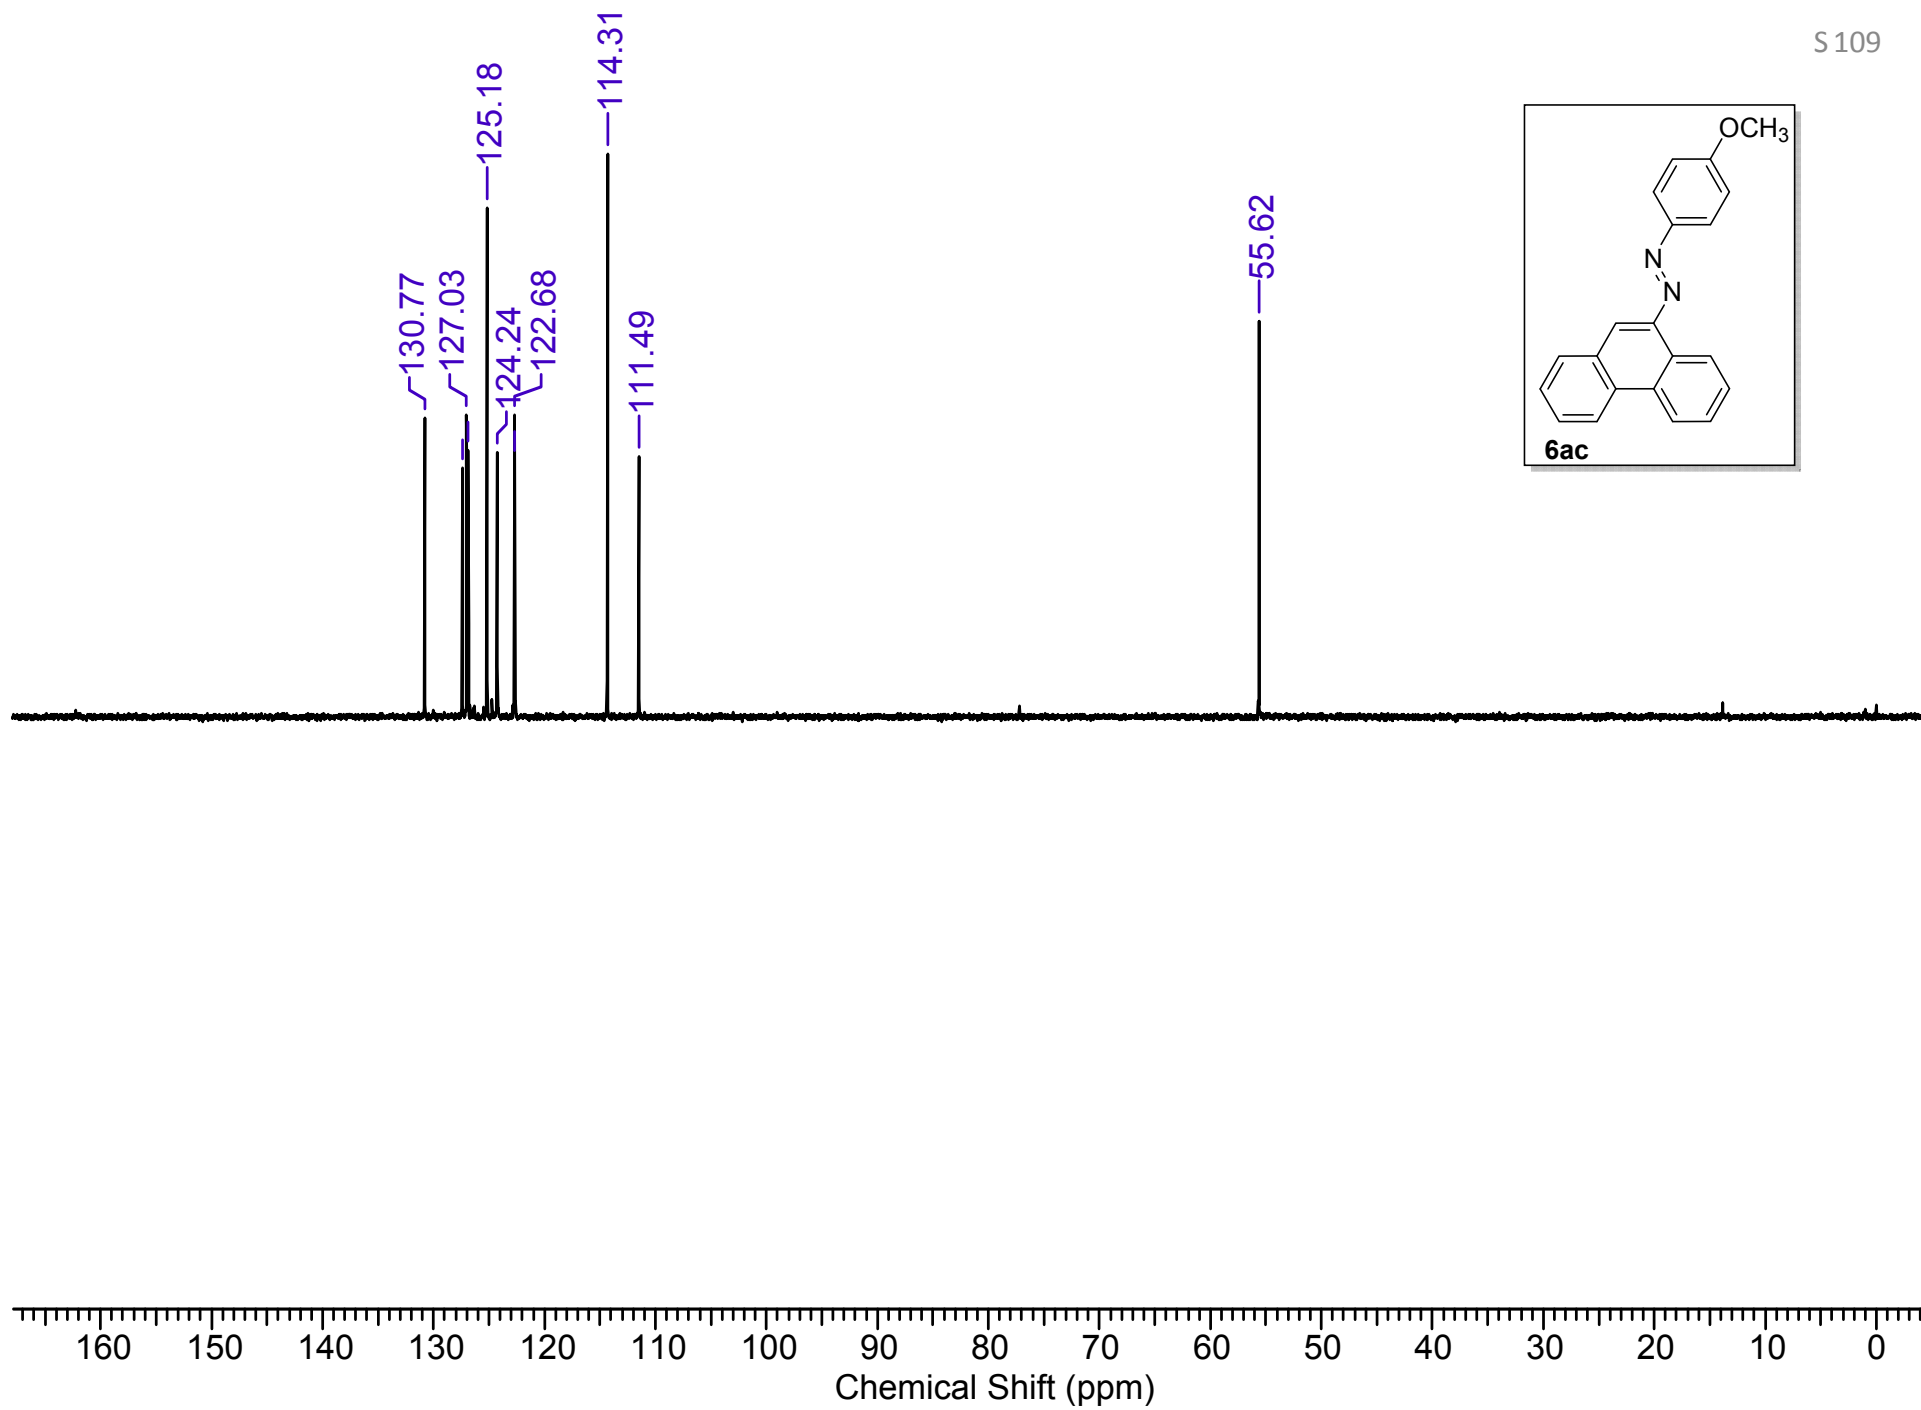

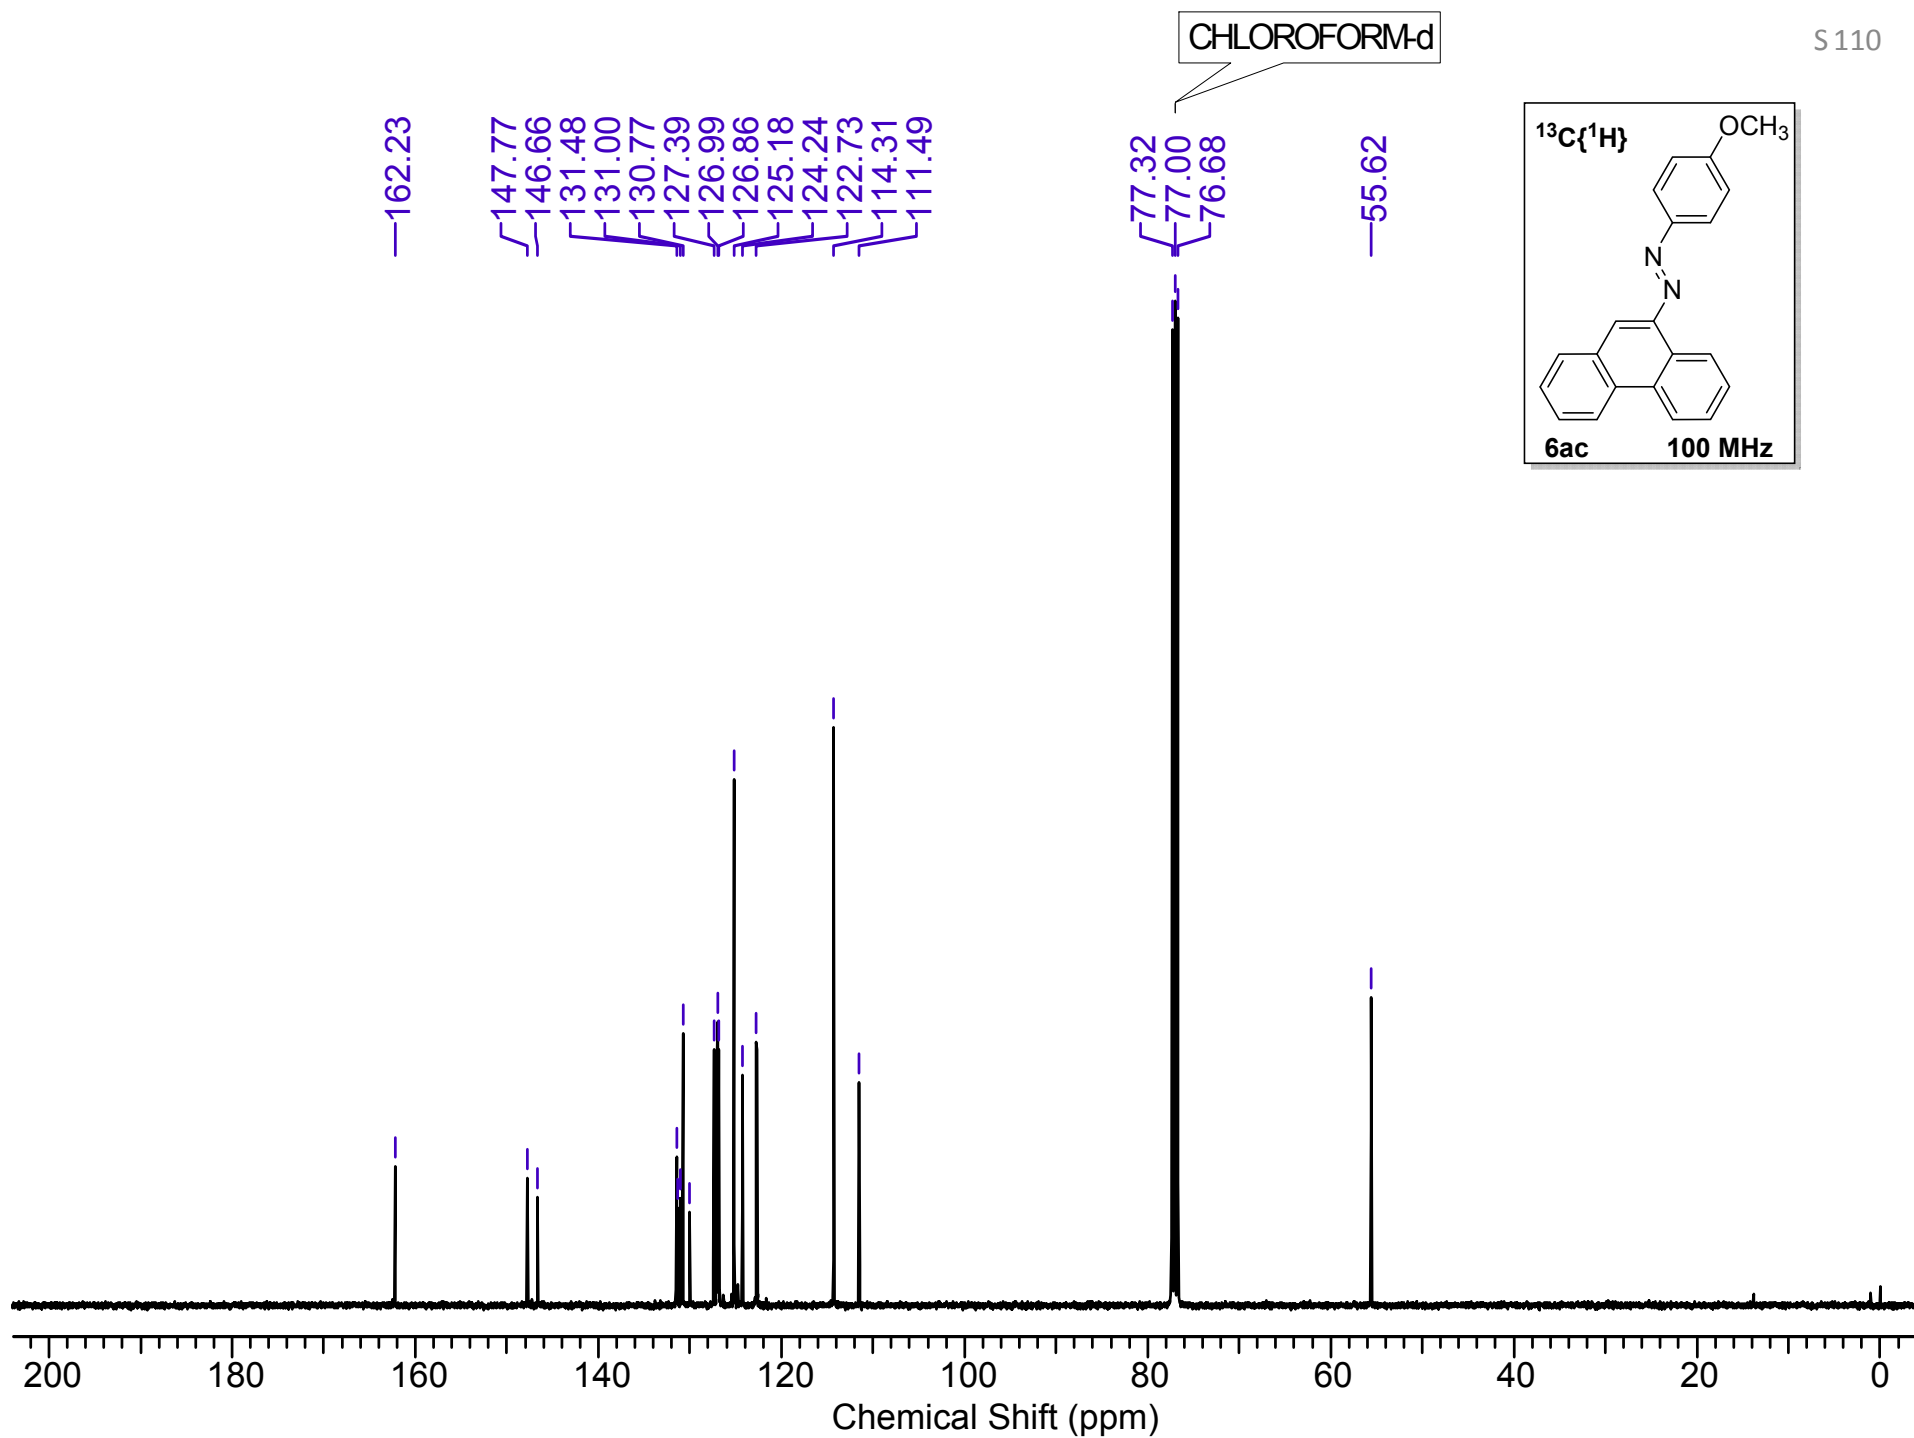

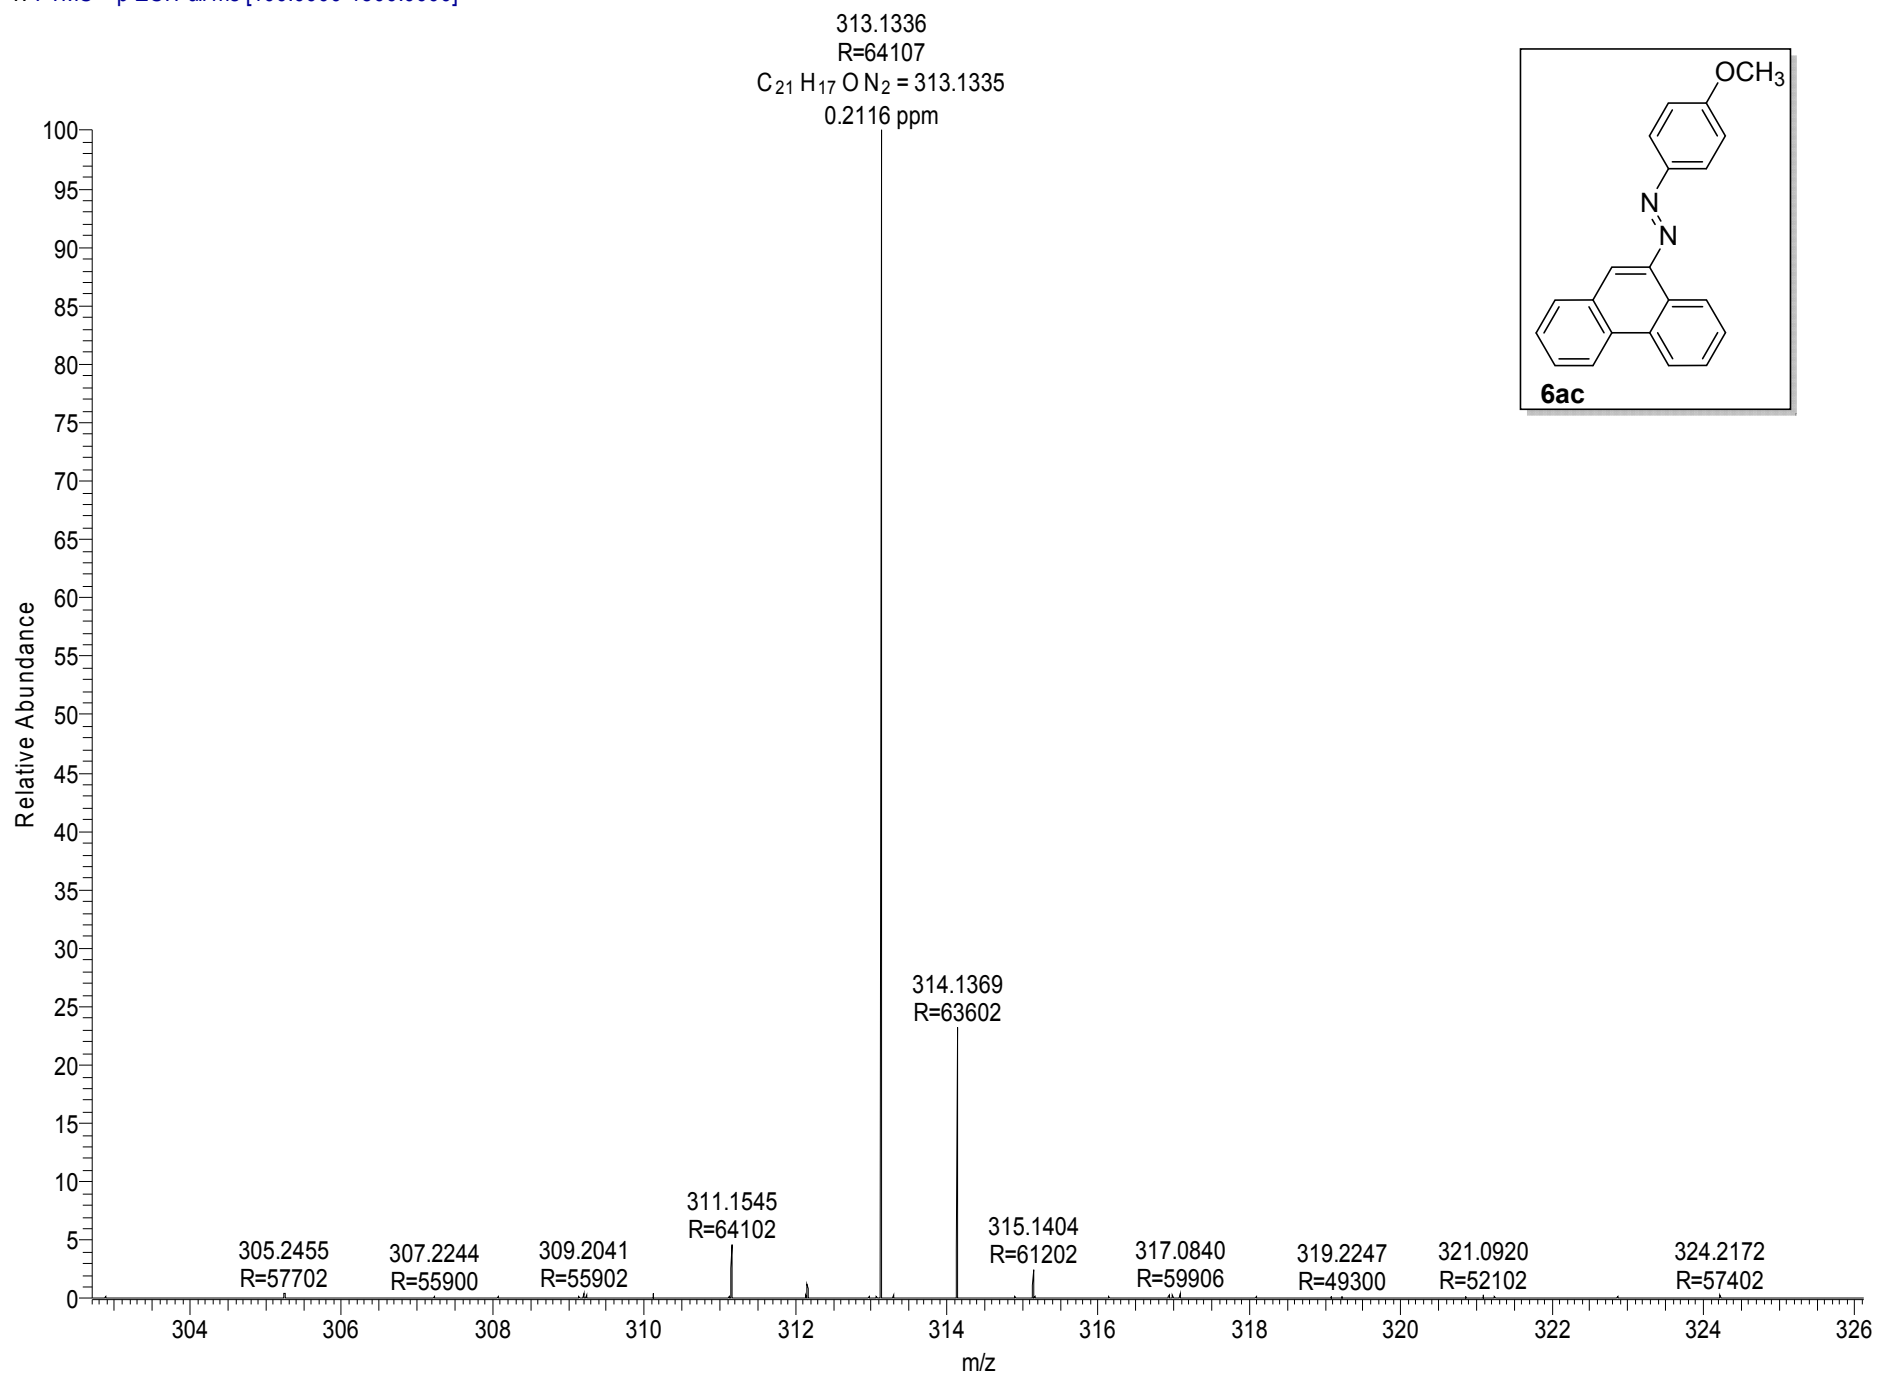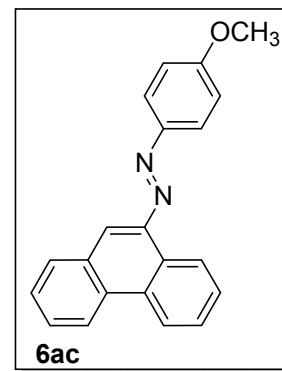

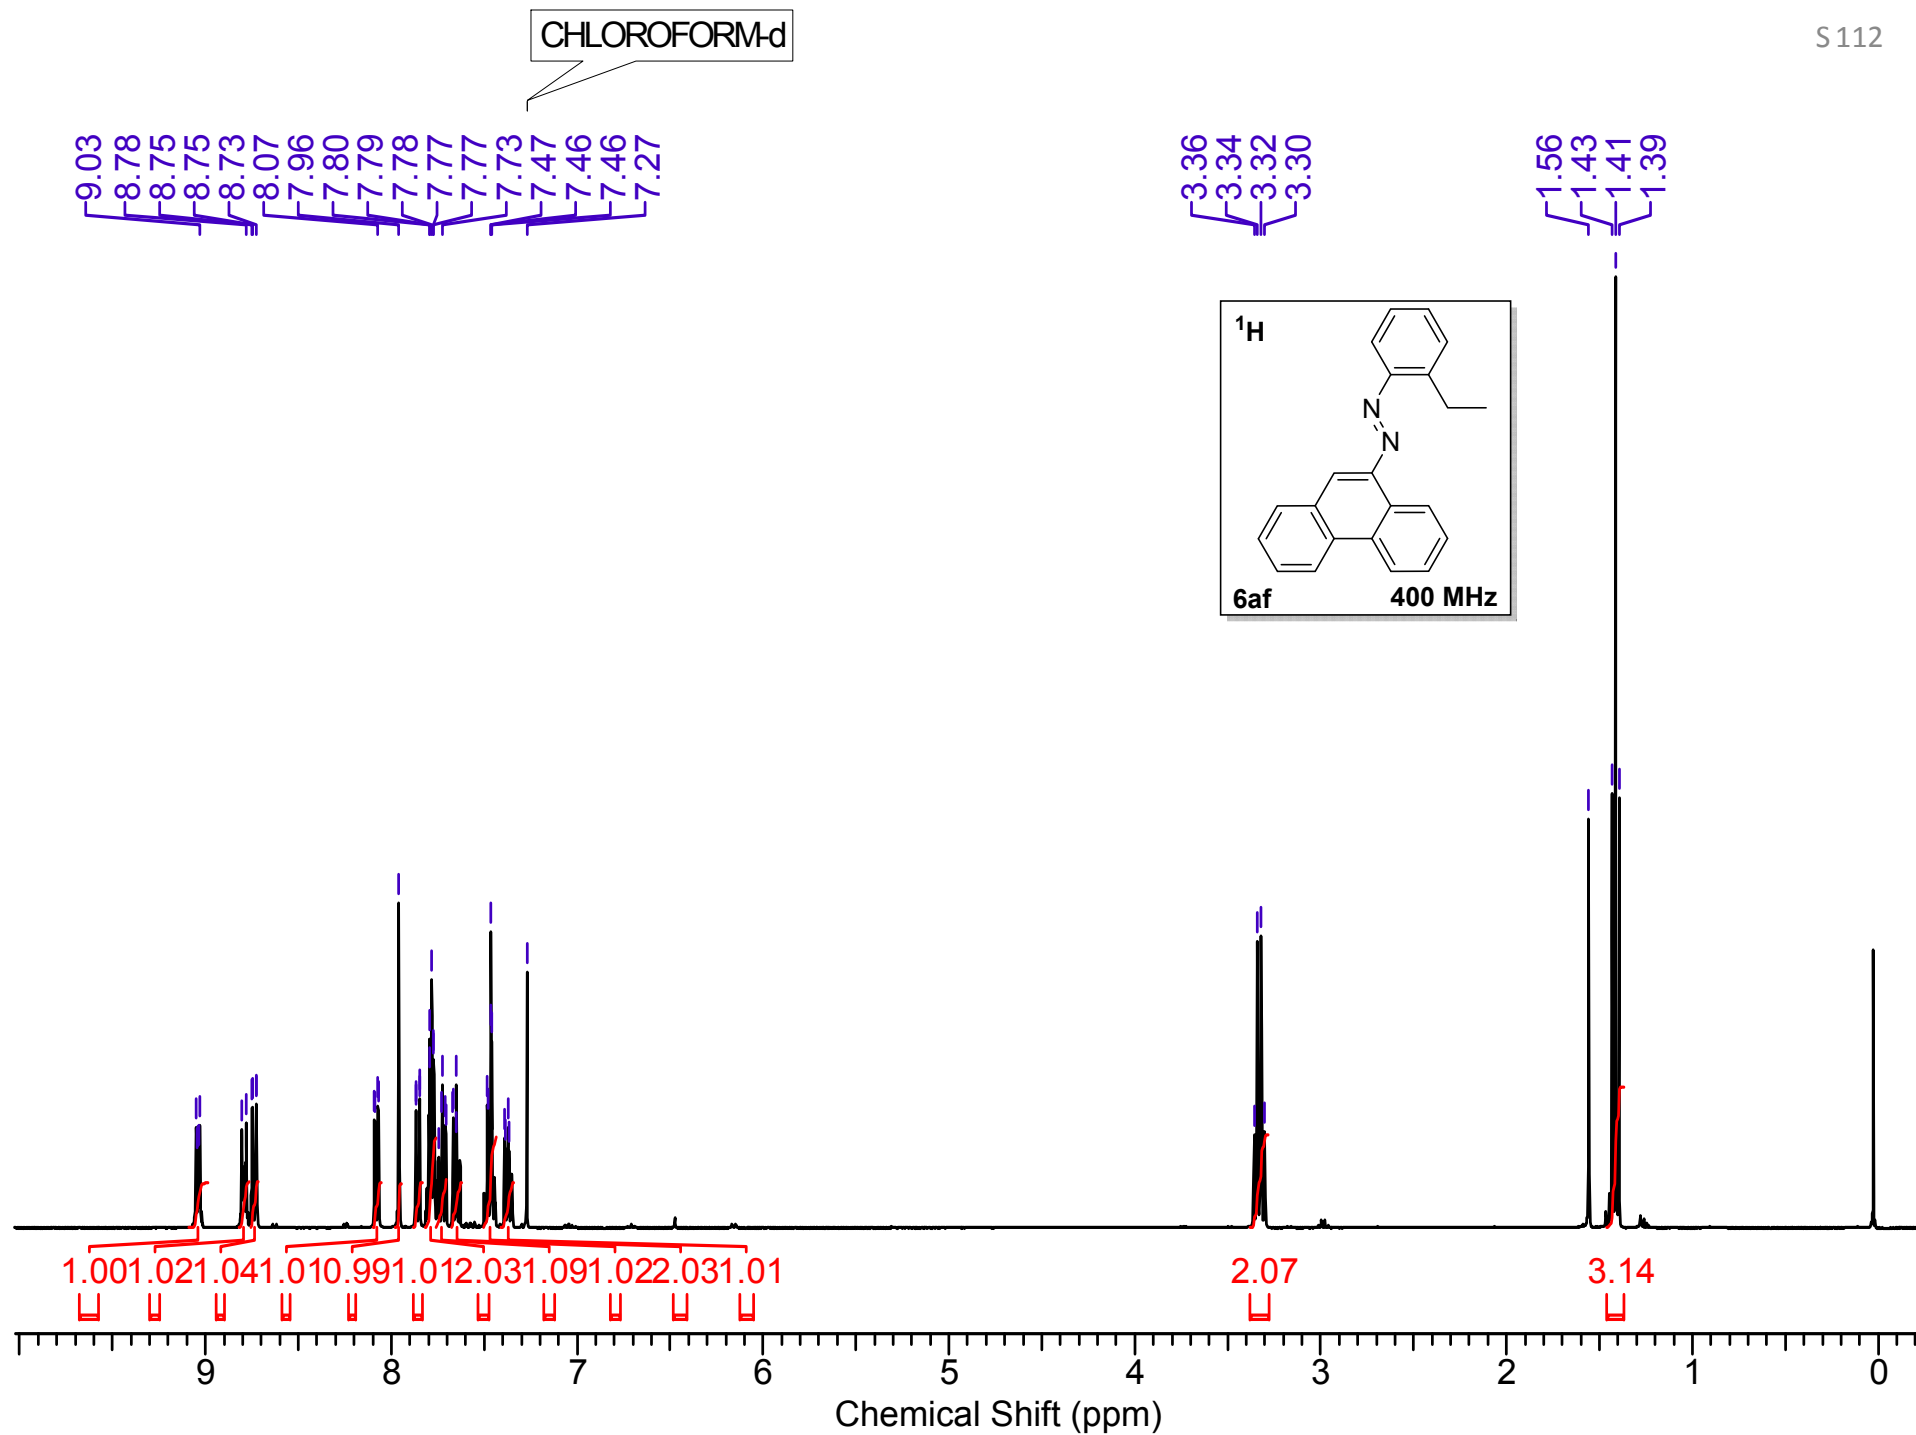



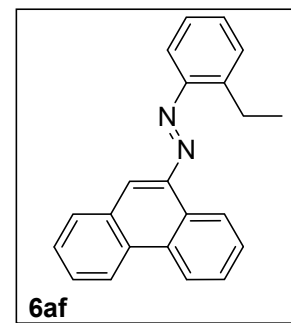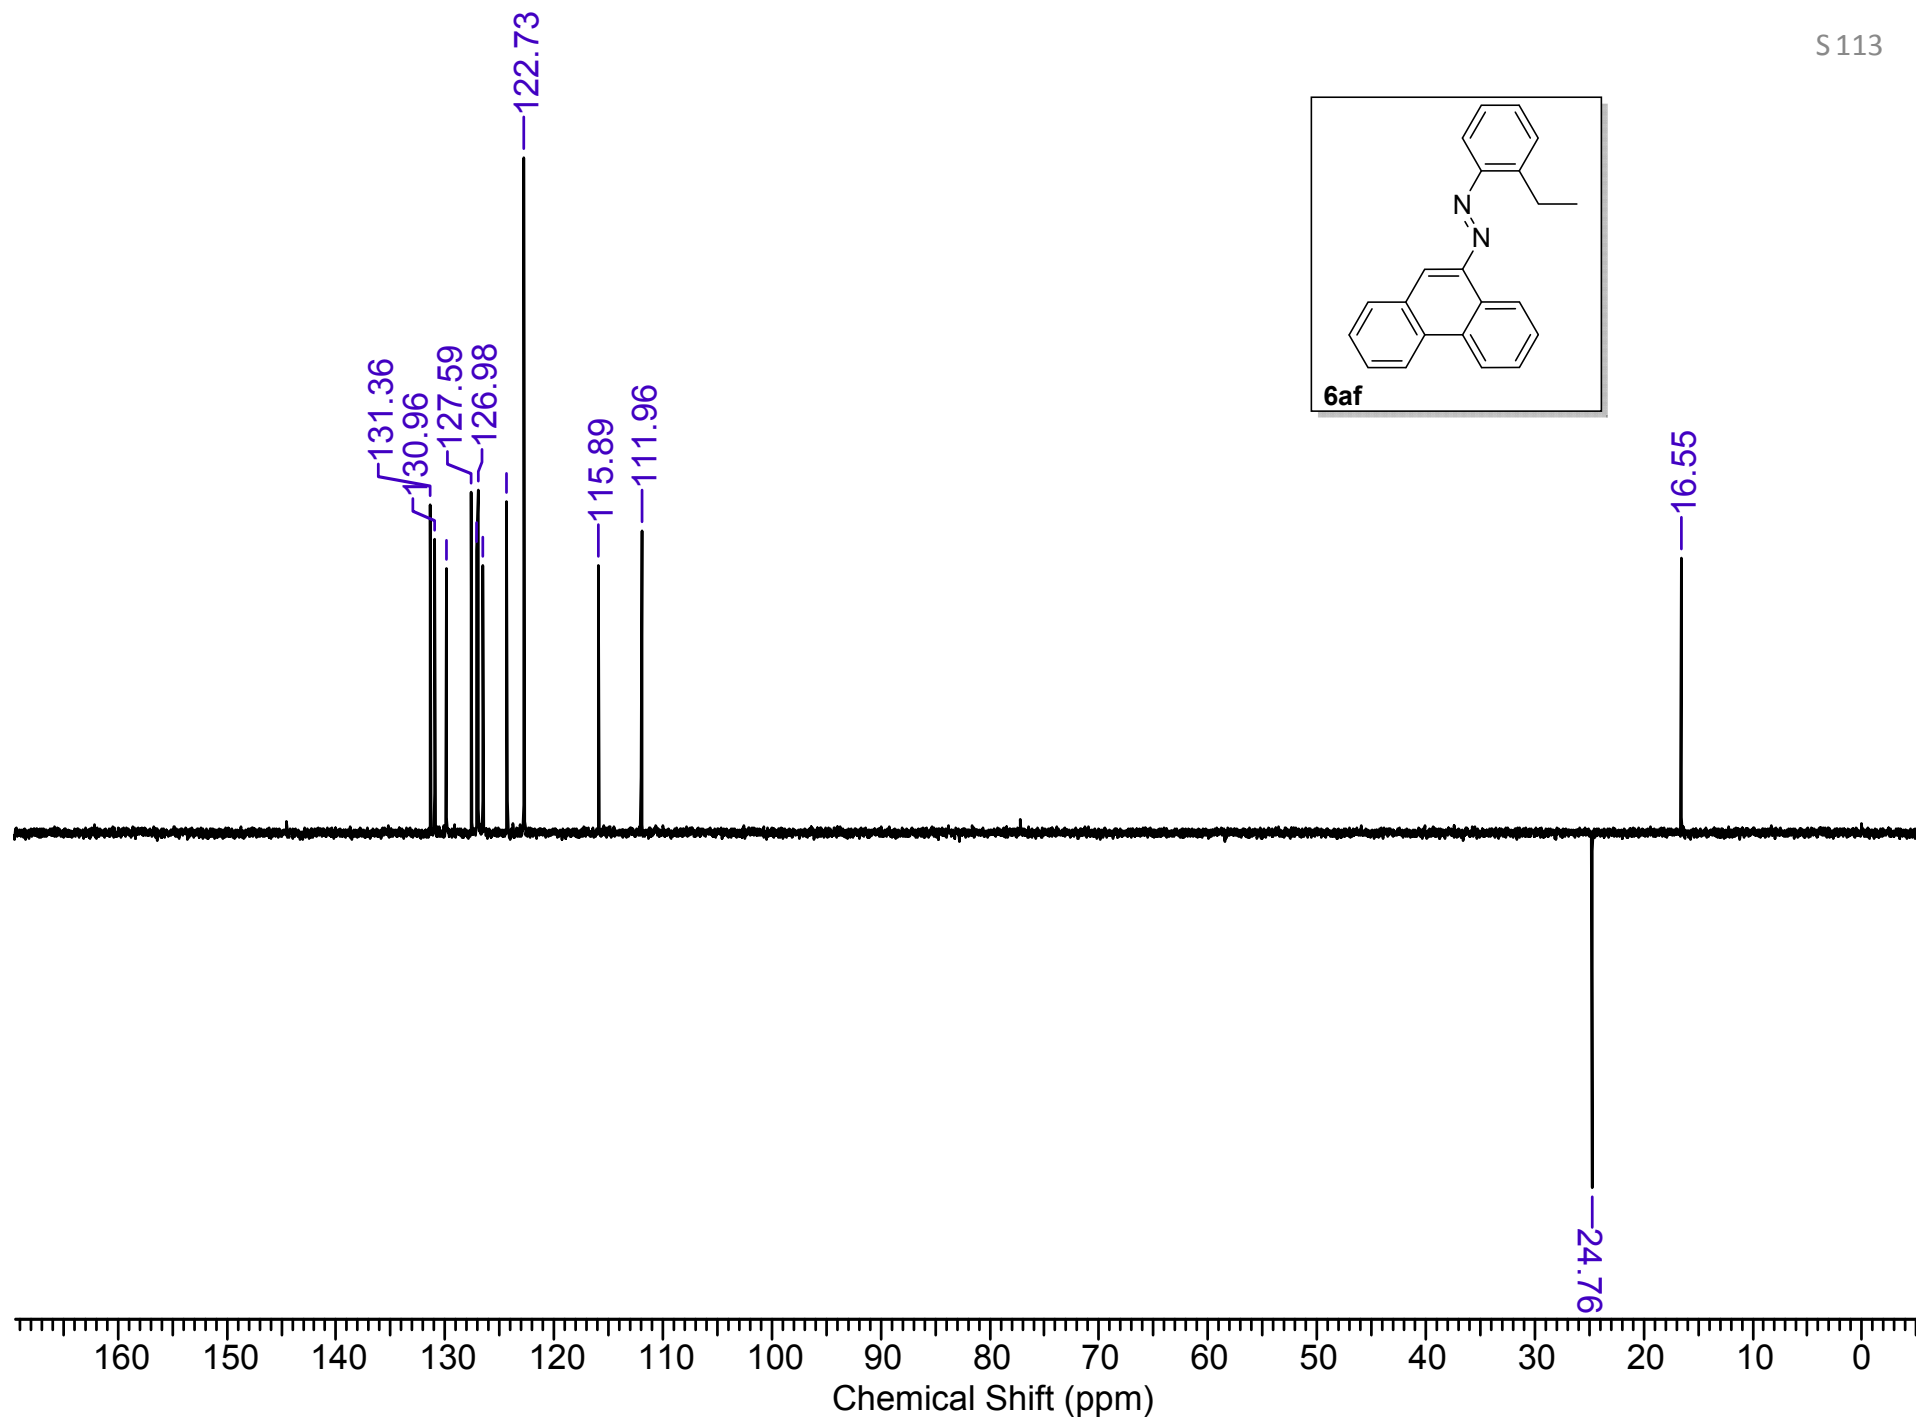

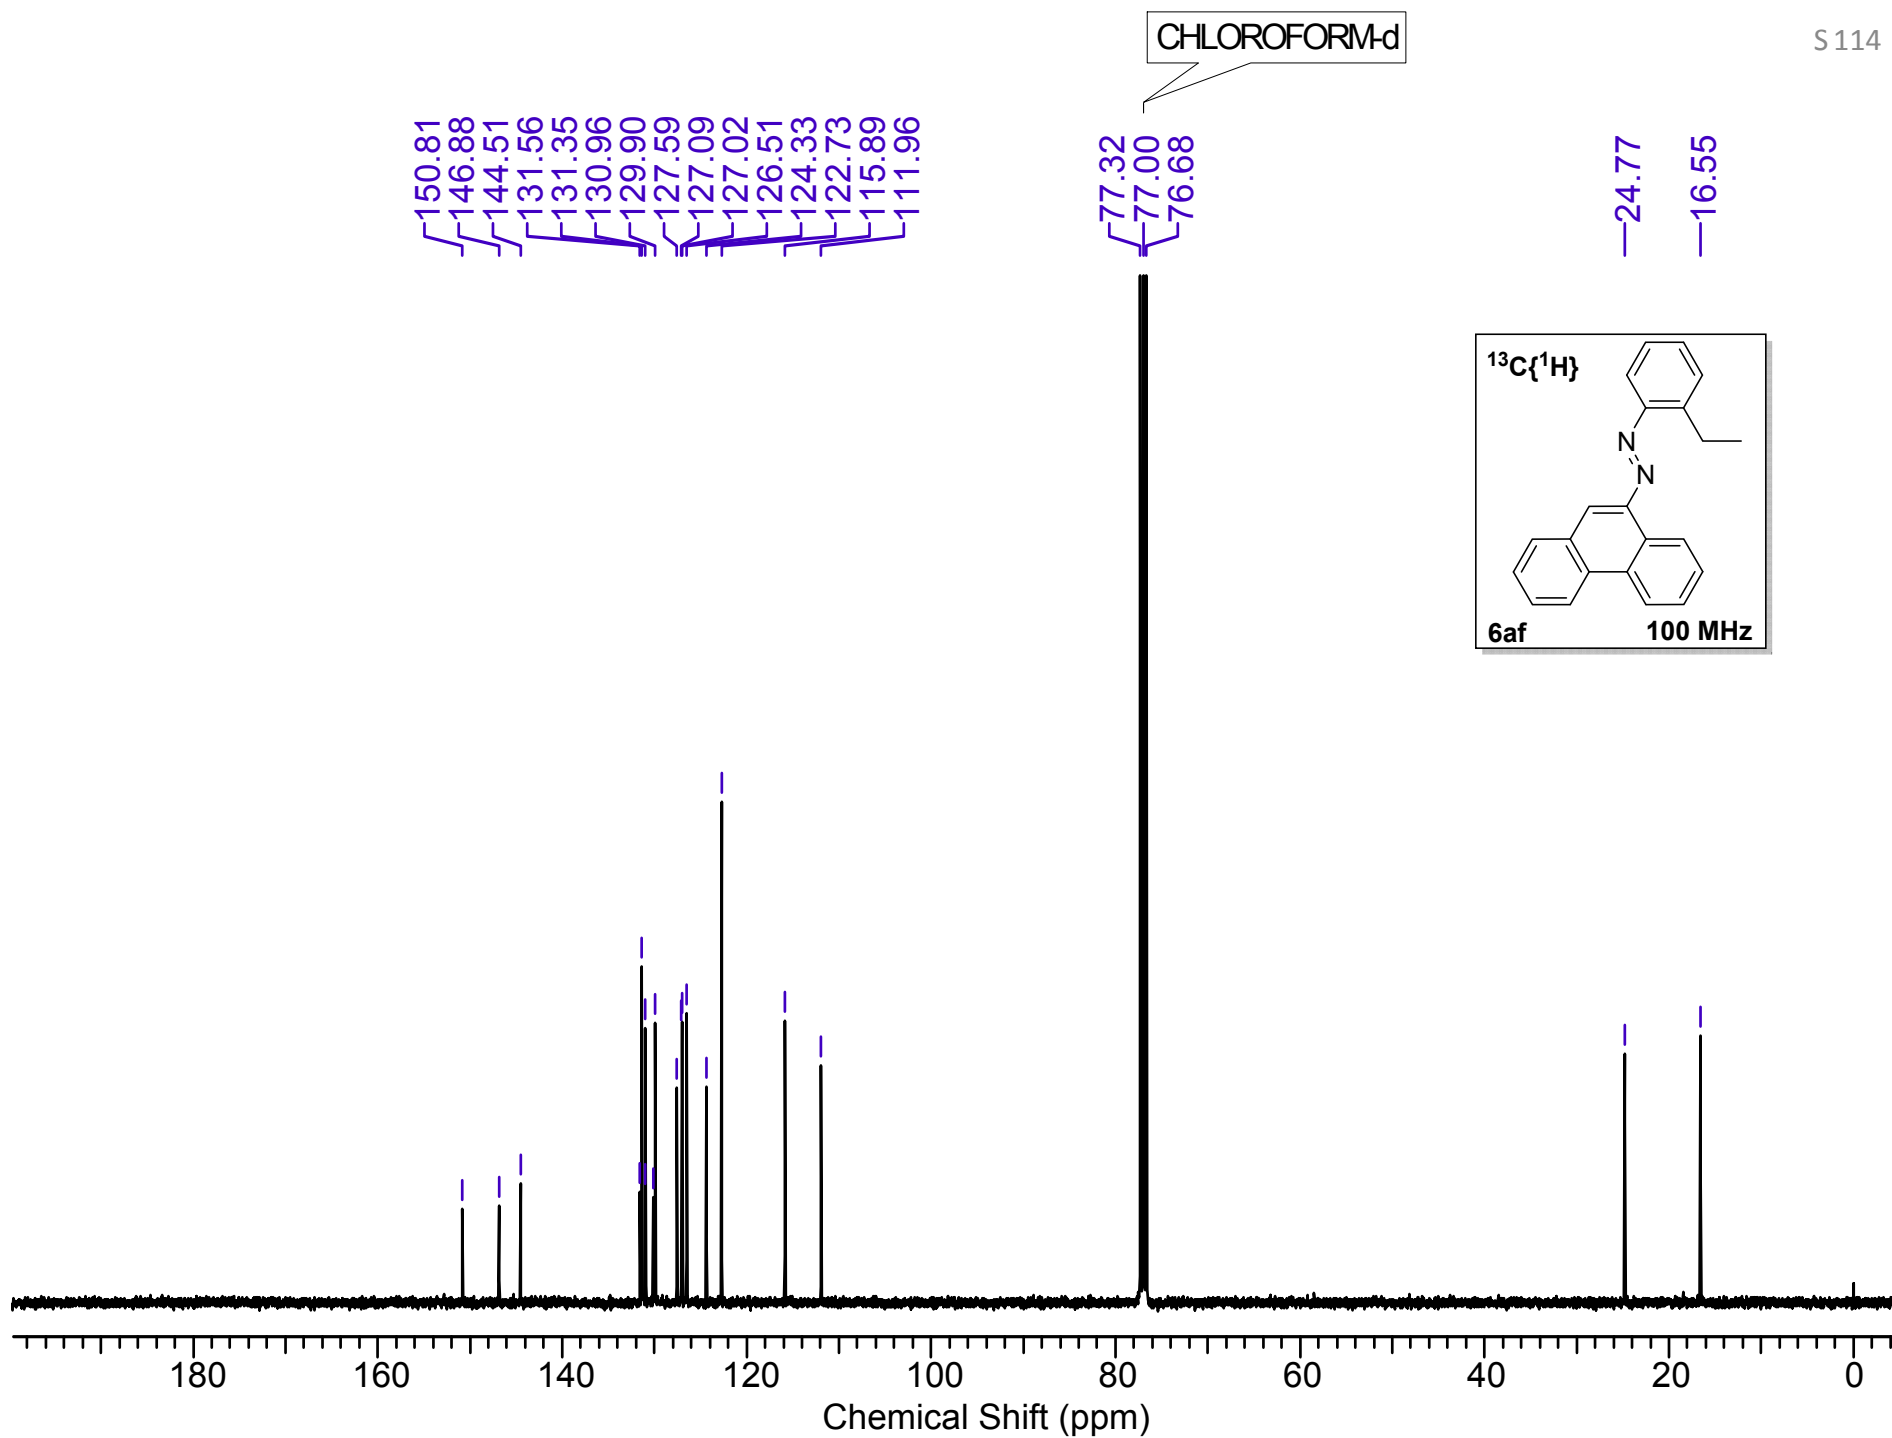

PSD-881-A #337 RT: 2.06 AV: 1 NL: 3.12E7  
T: FTMS + p ESI Full ms [100.0000-1500.0000]

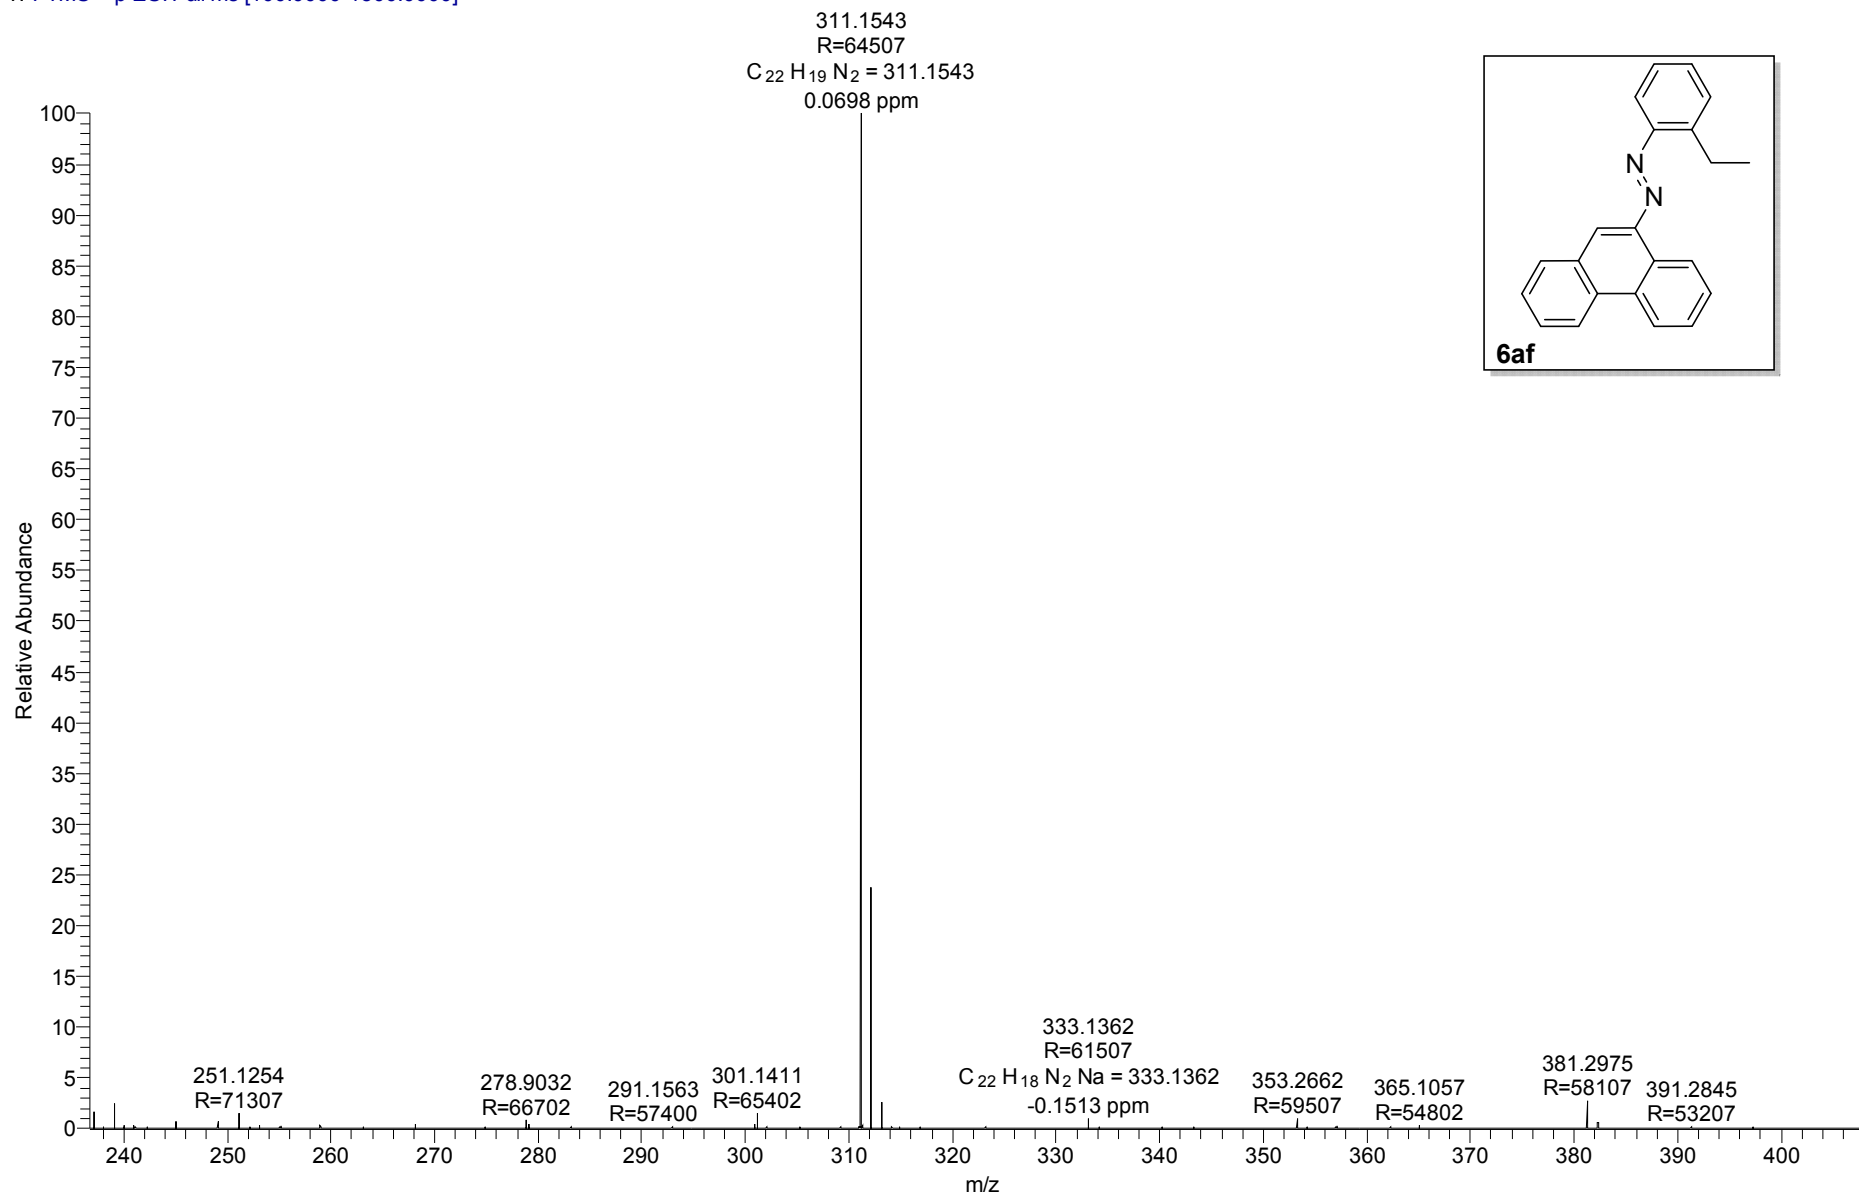

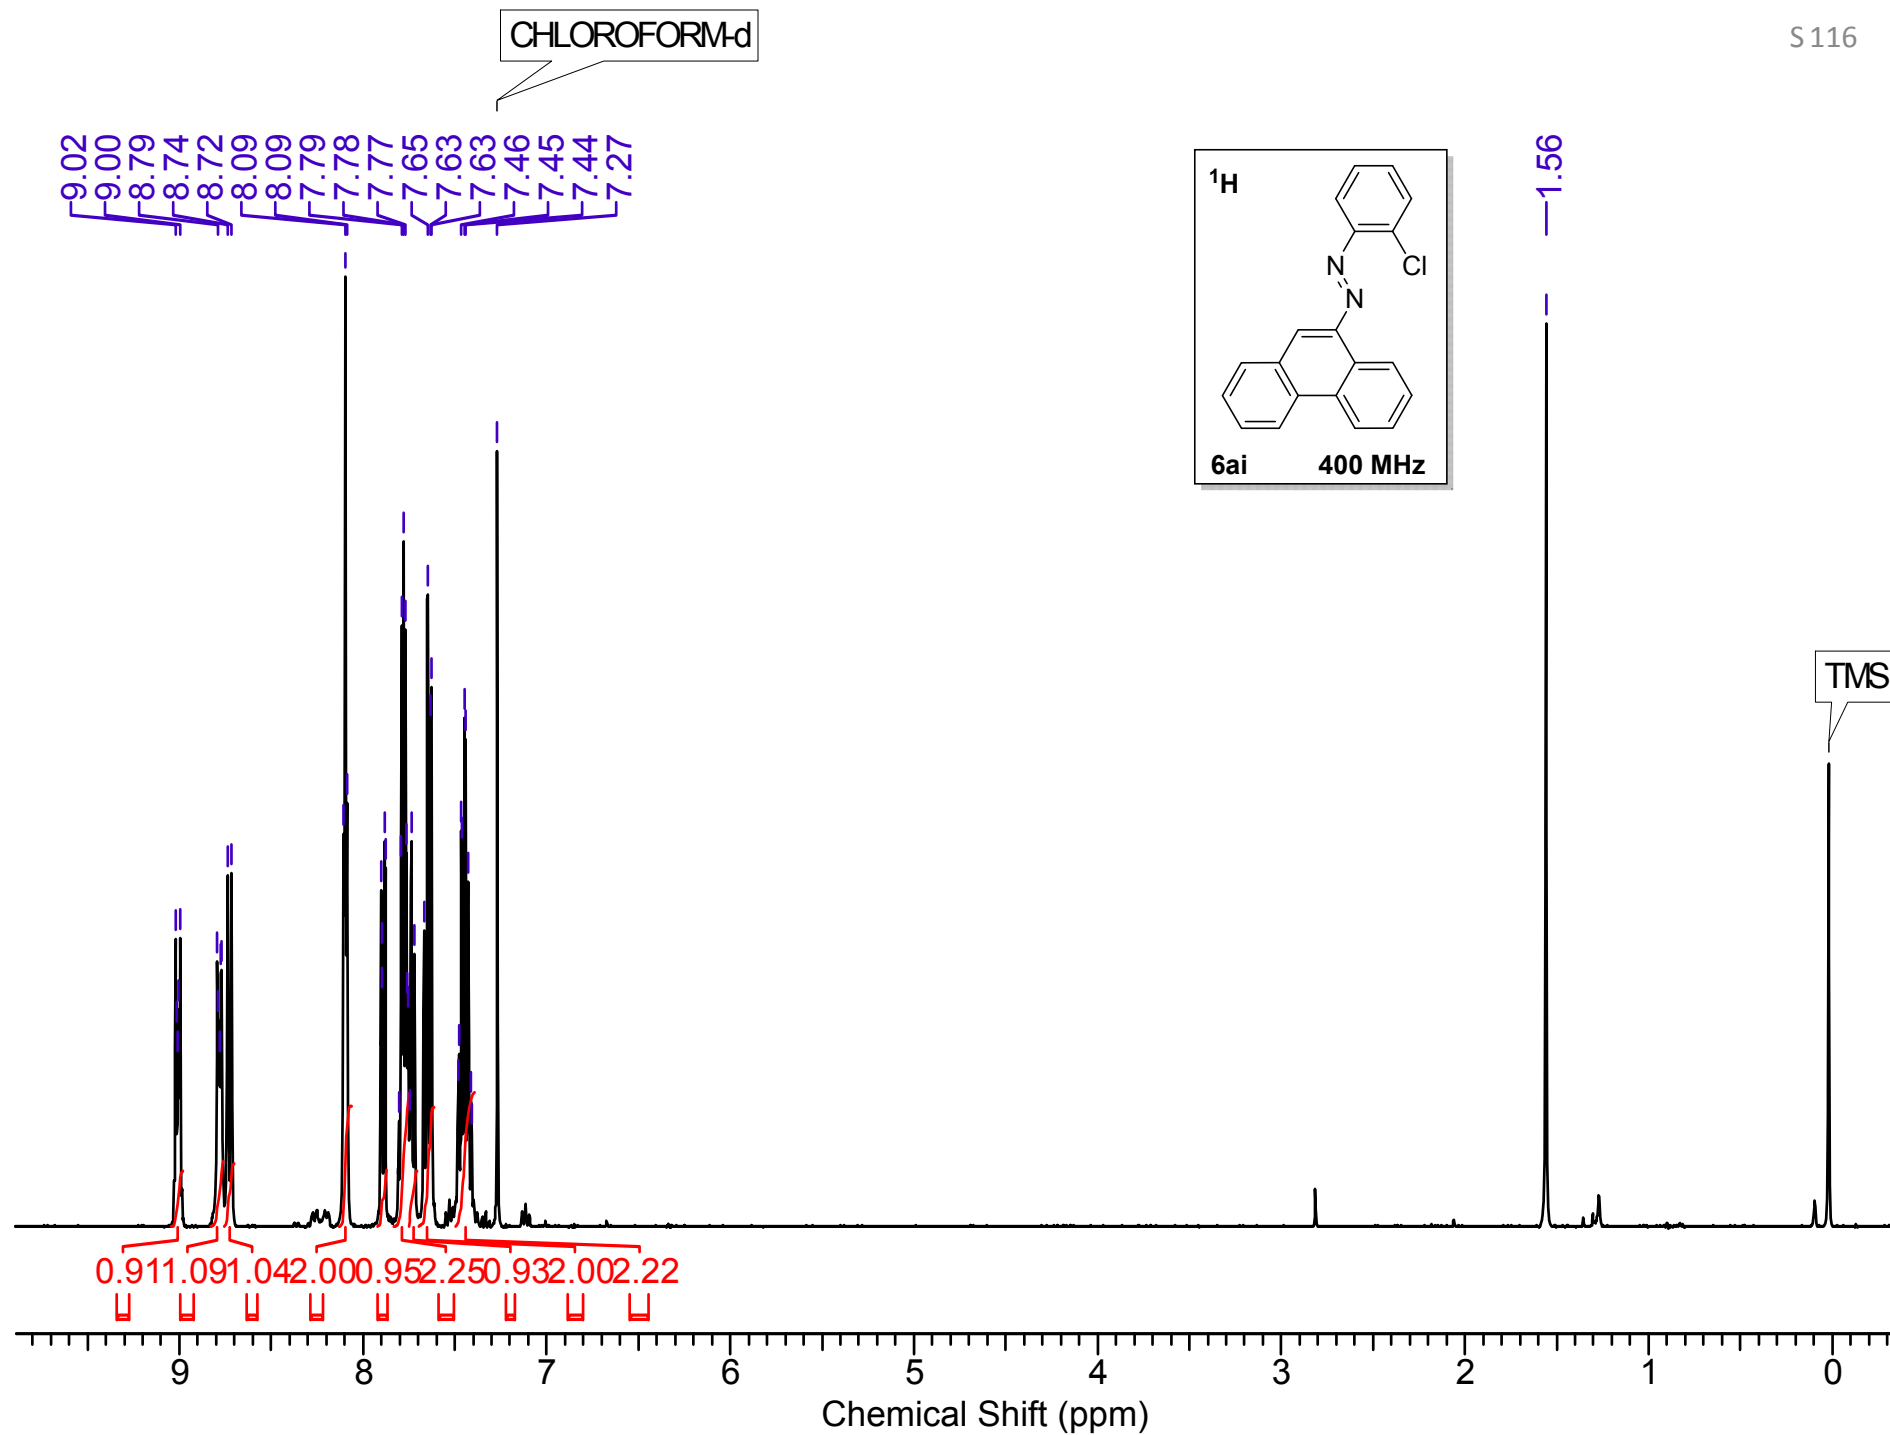

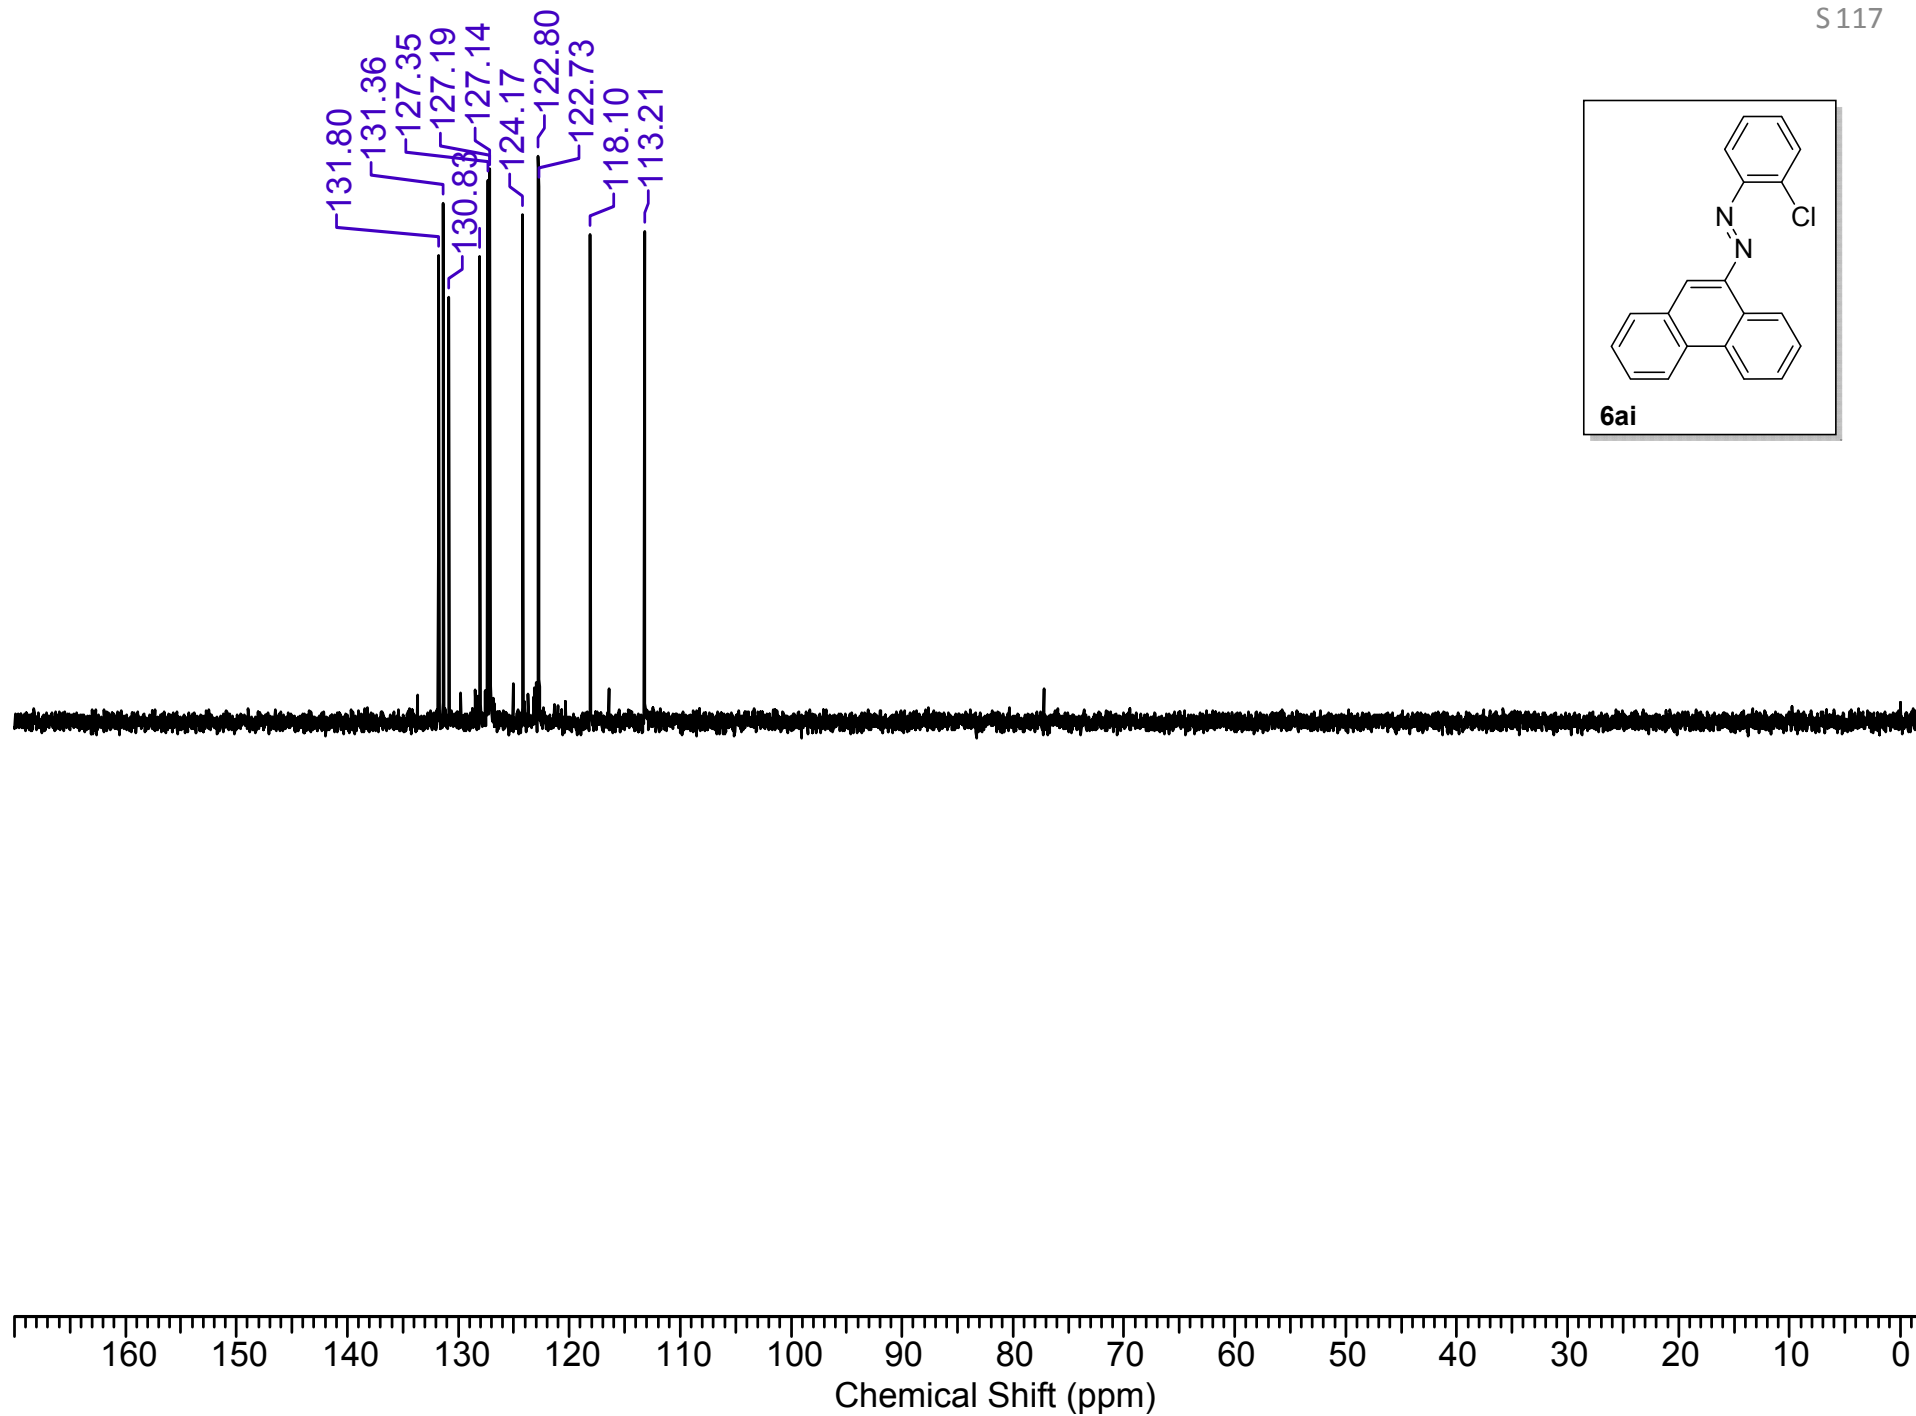

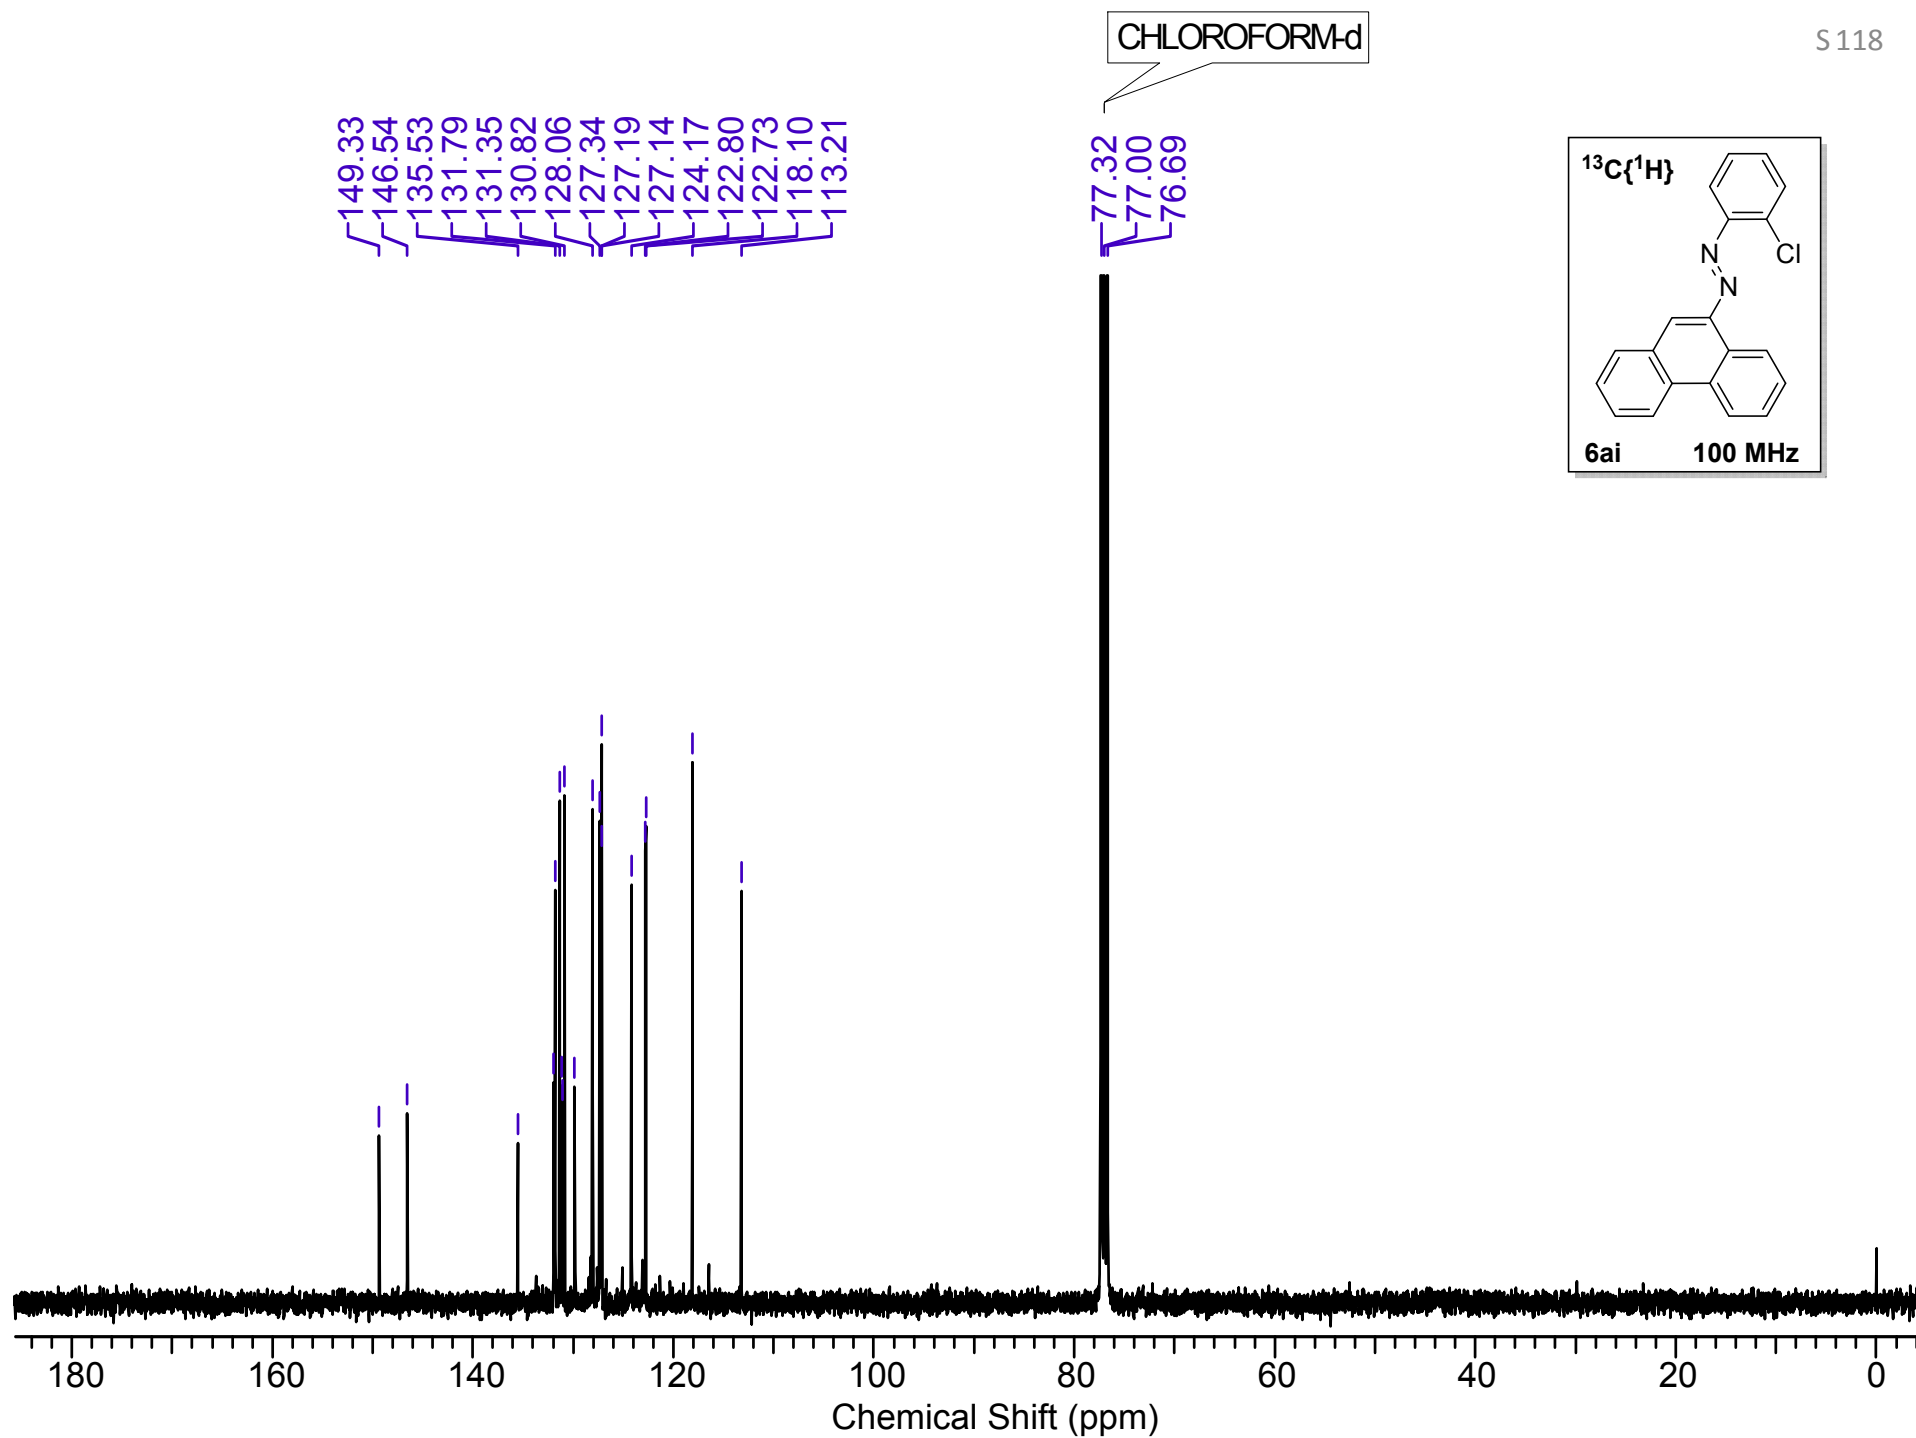

PSD-880 #599 RT: 3.65 AV: 1 NL: 1.24E7  
T: FTMS + p ESI Full ms [100.0000-1500.0000]

S 119

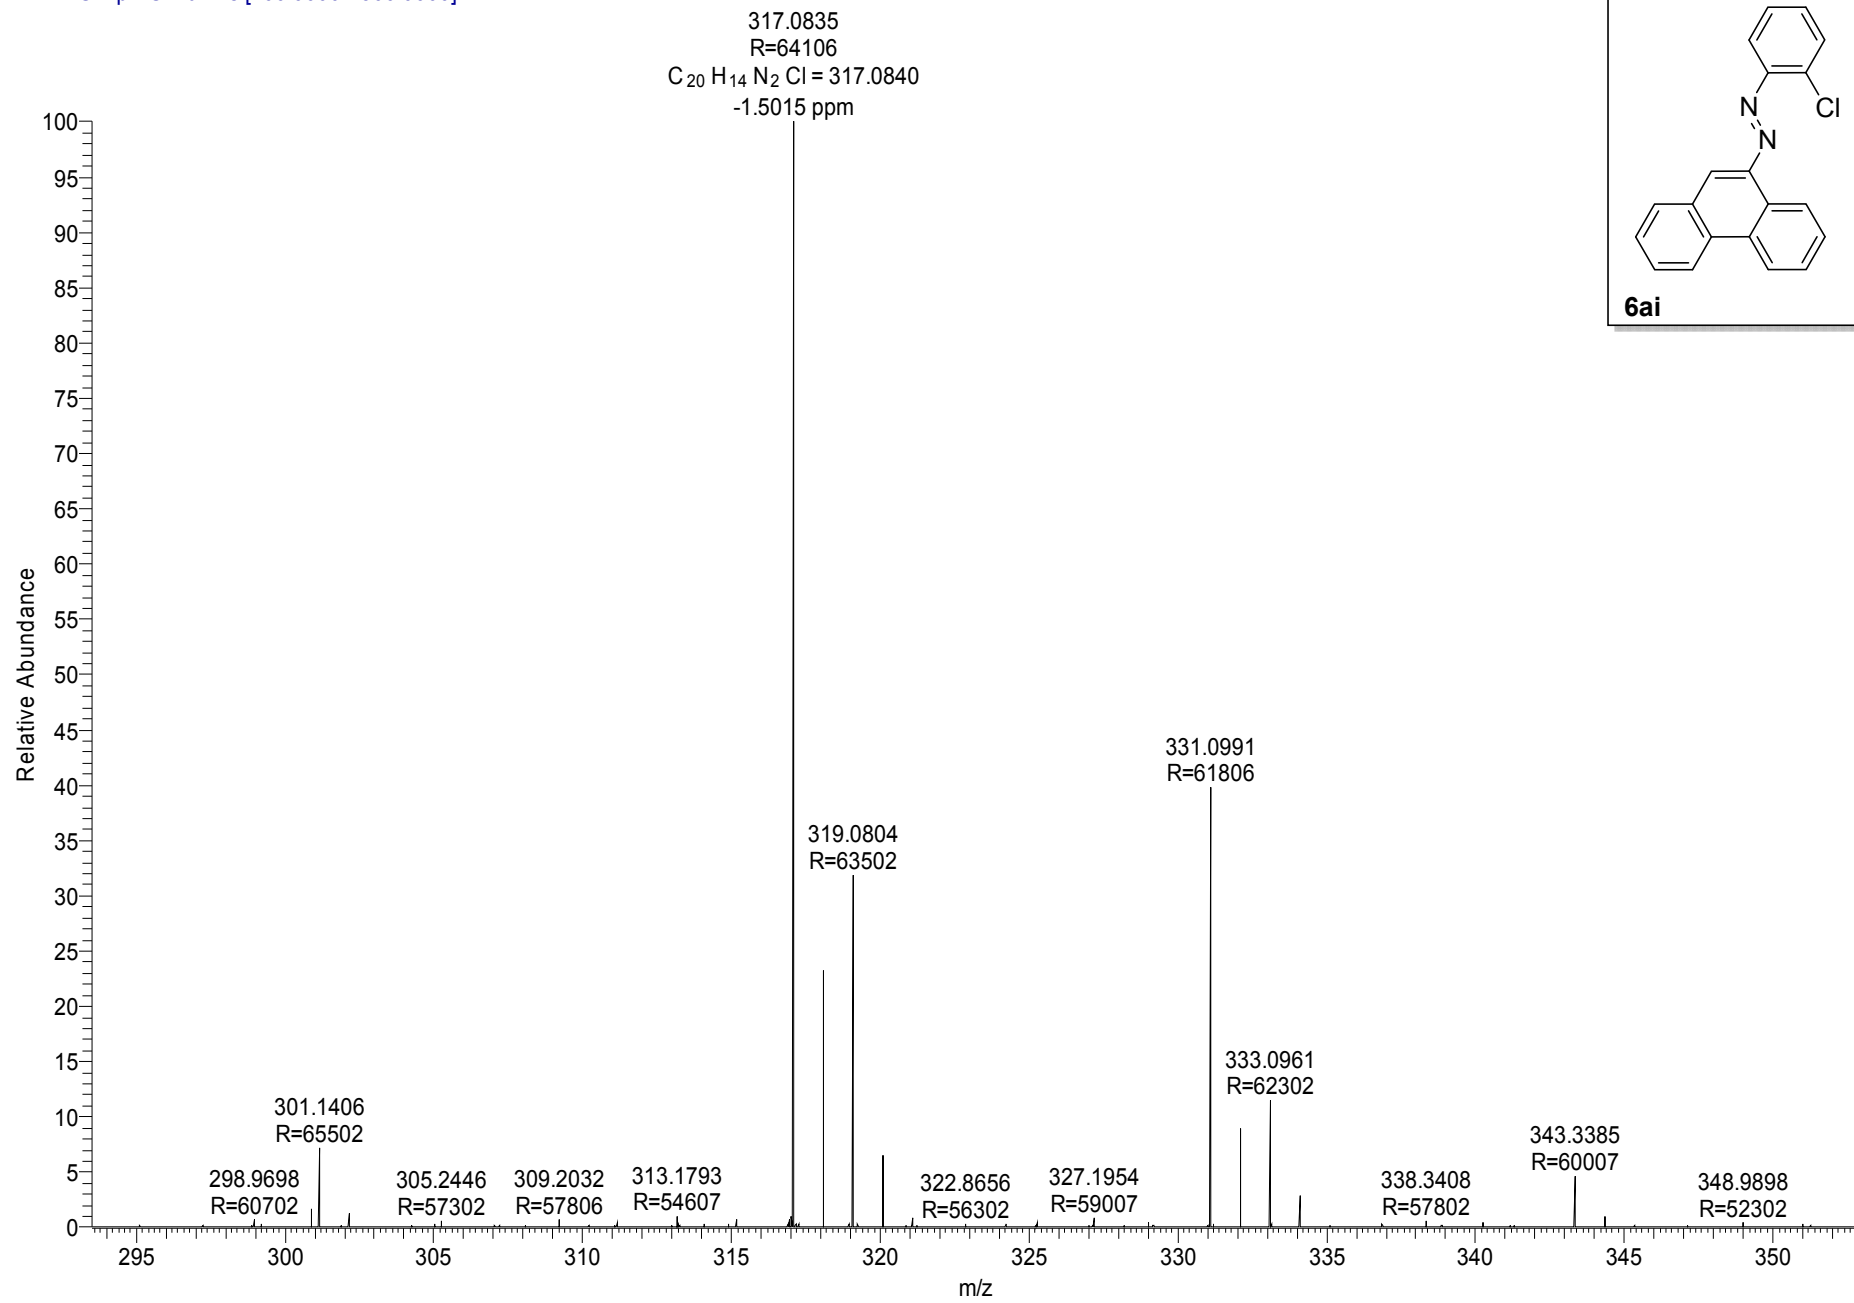

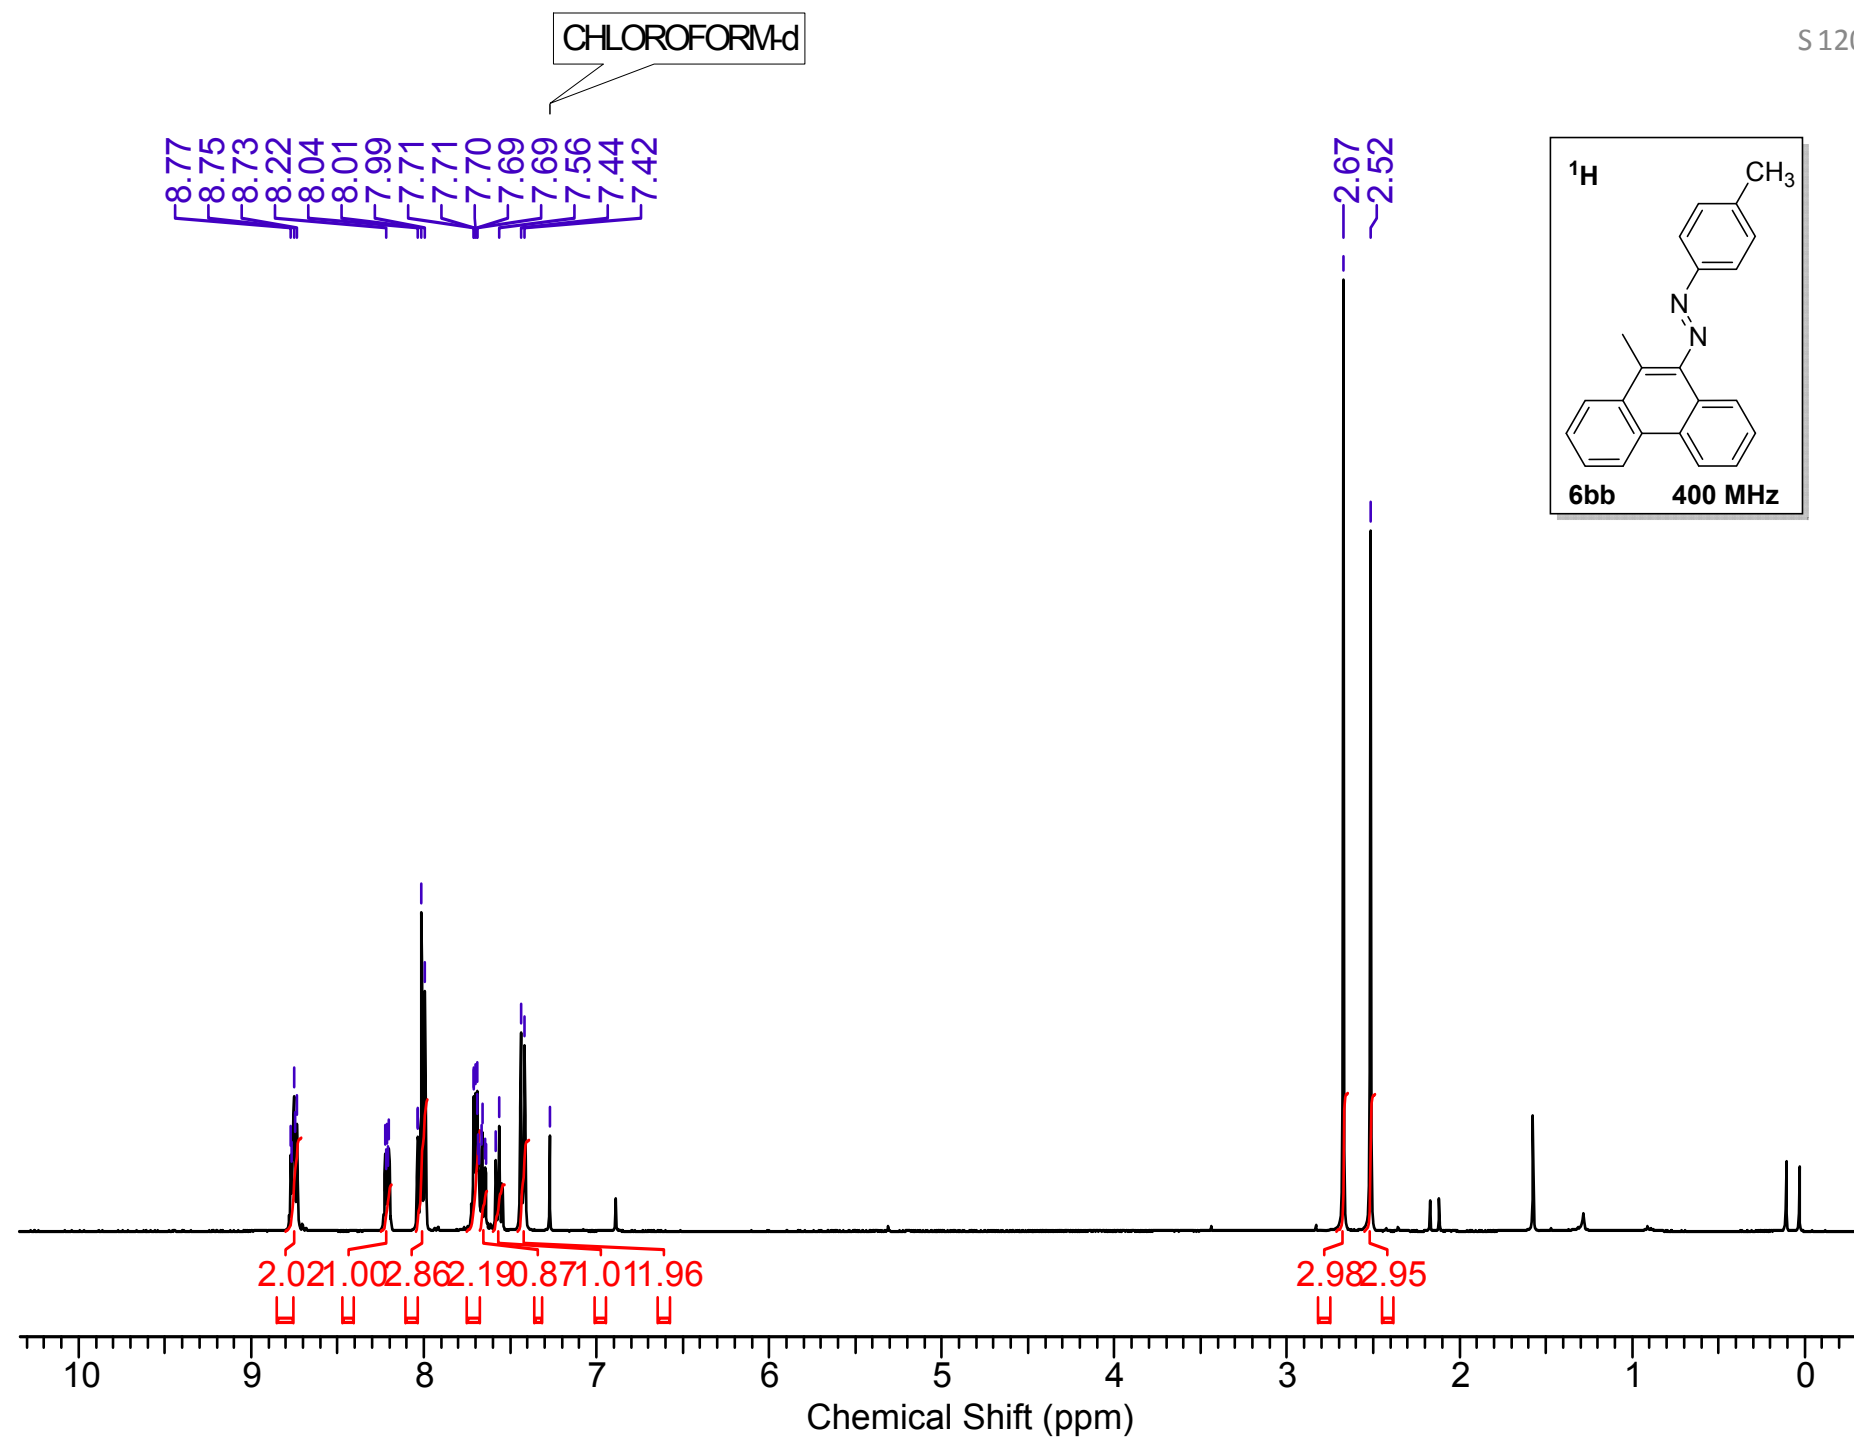



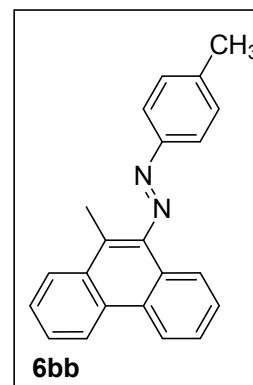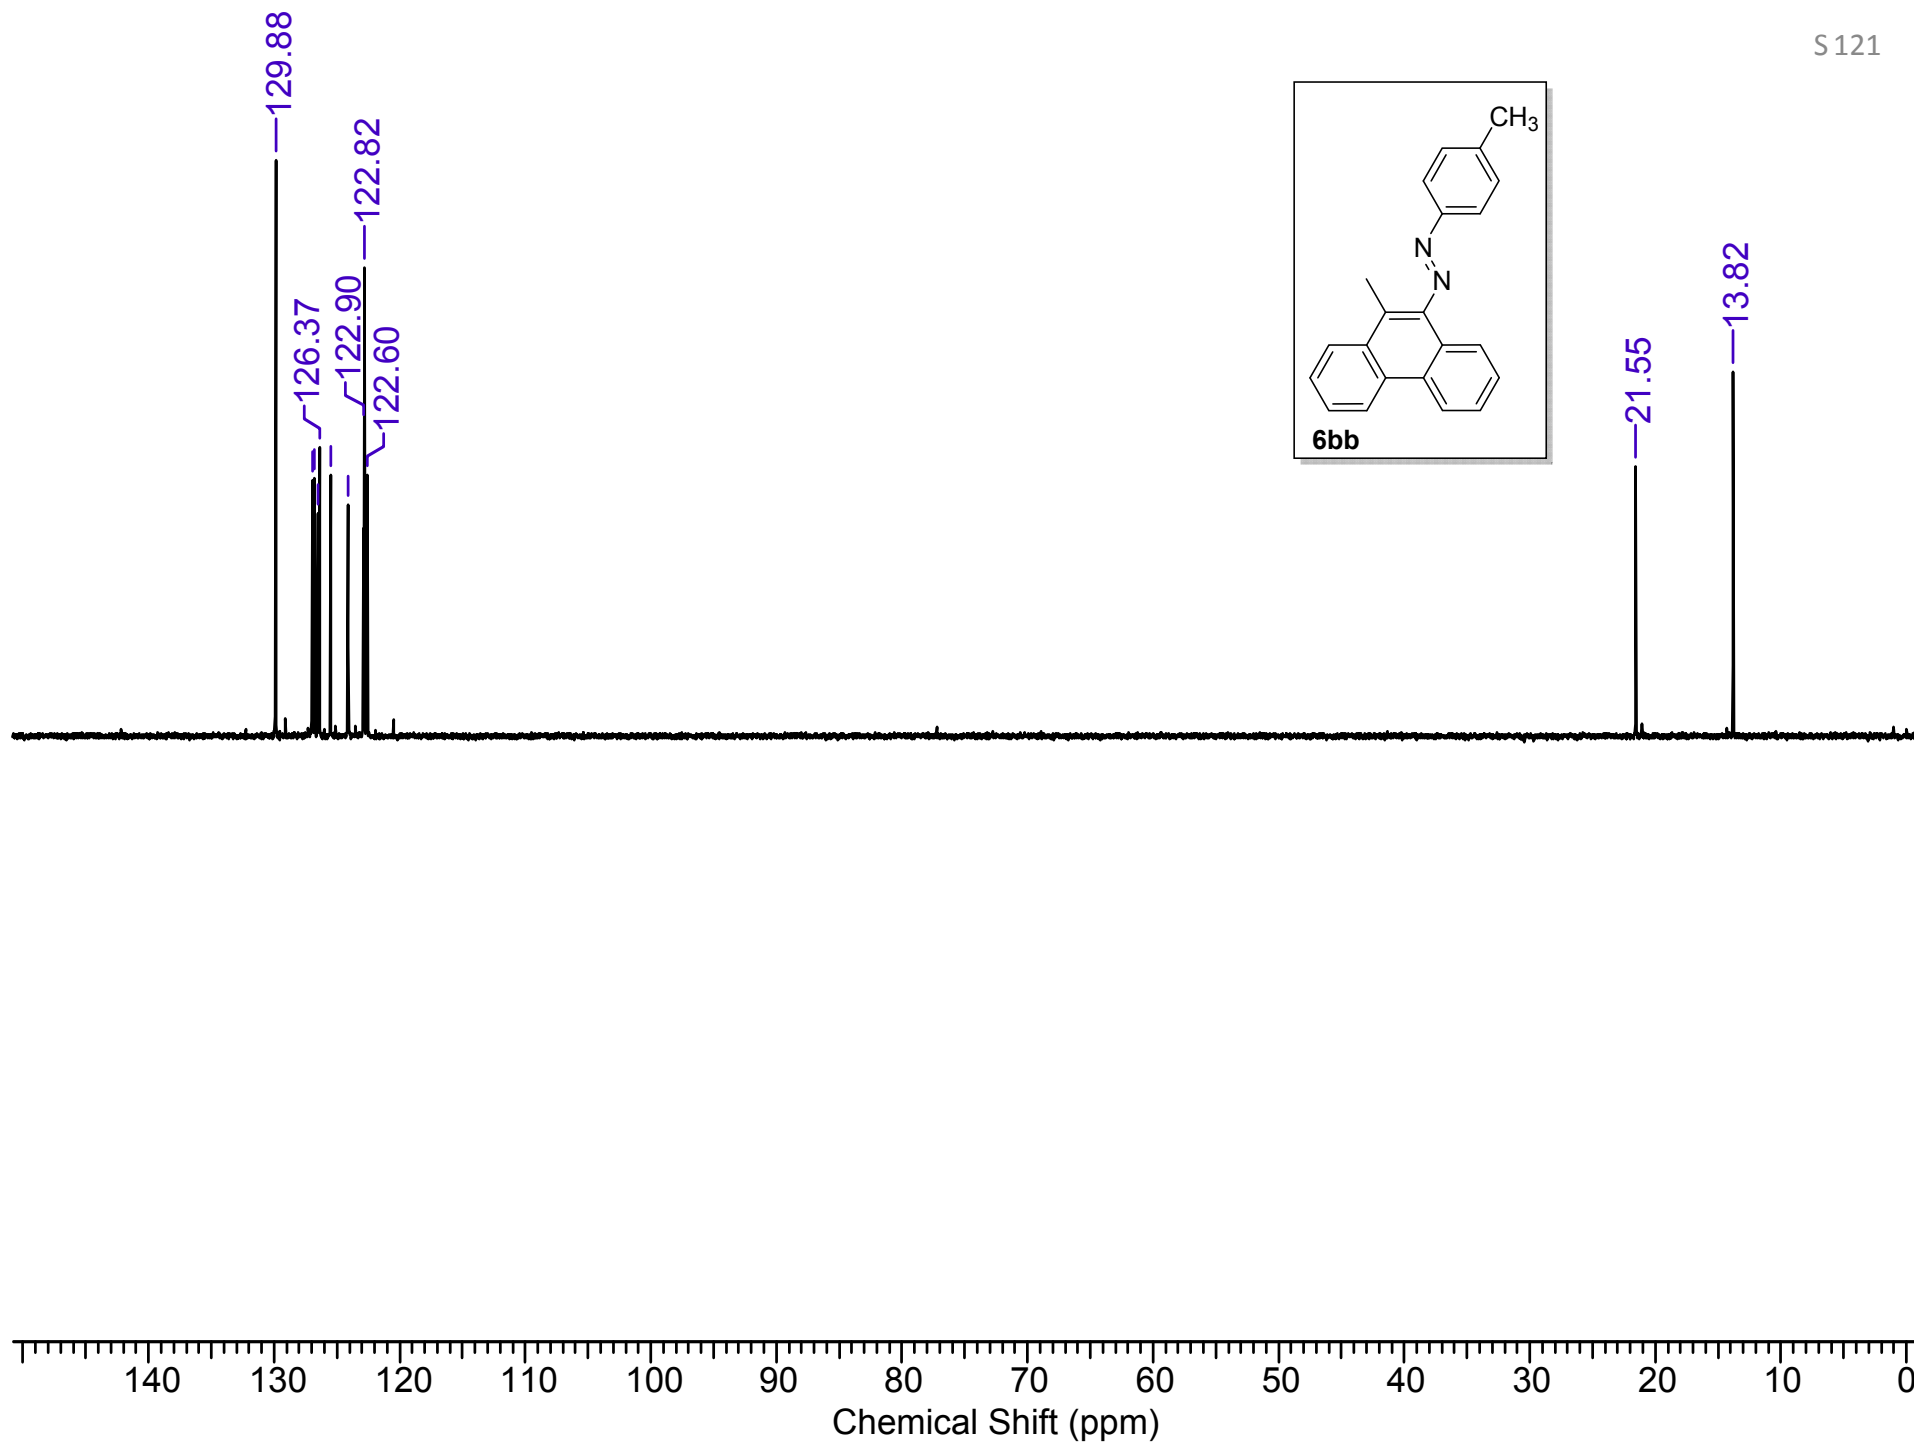

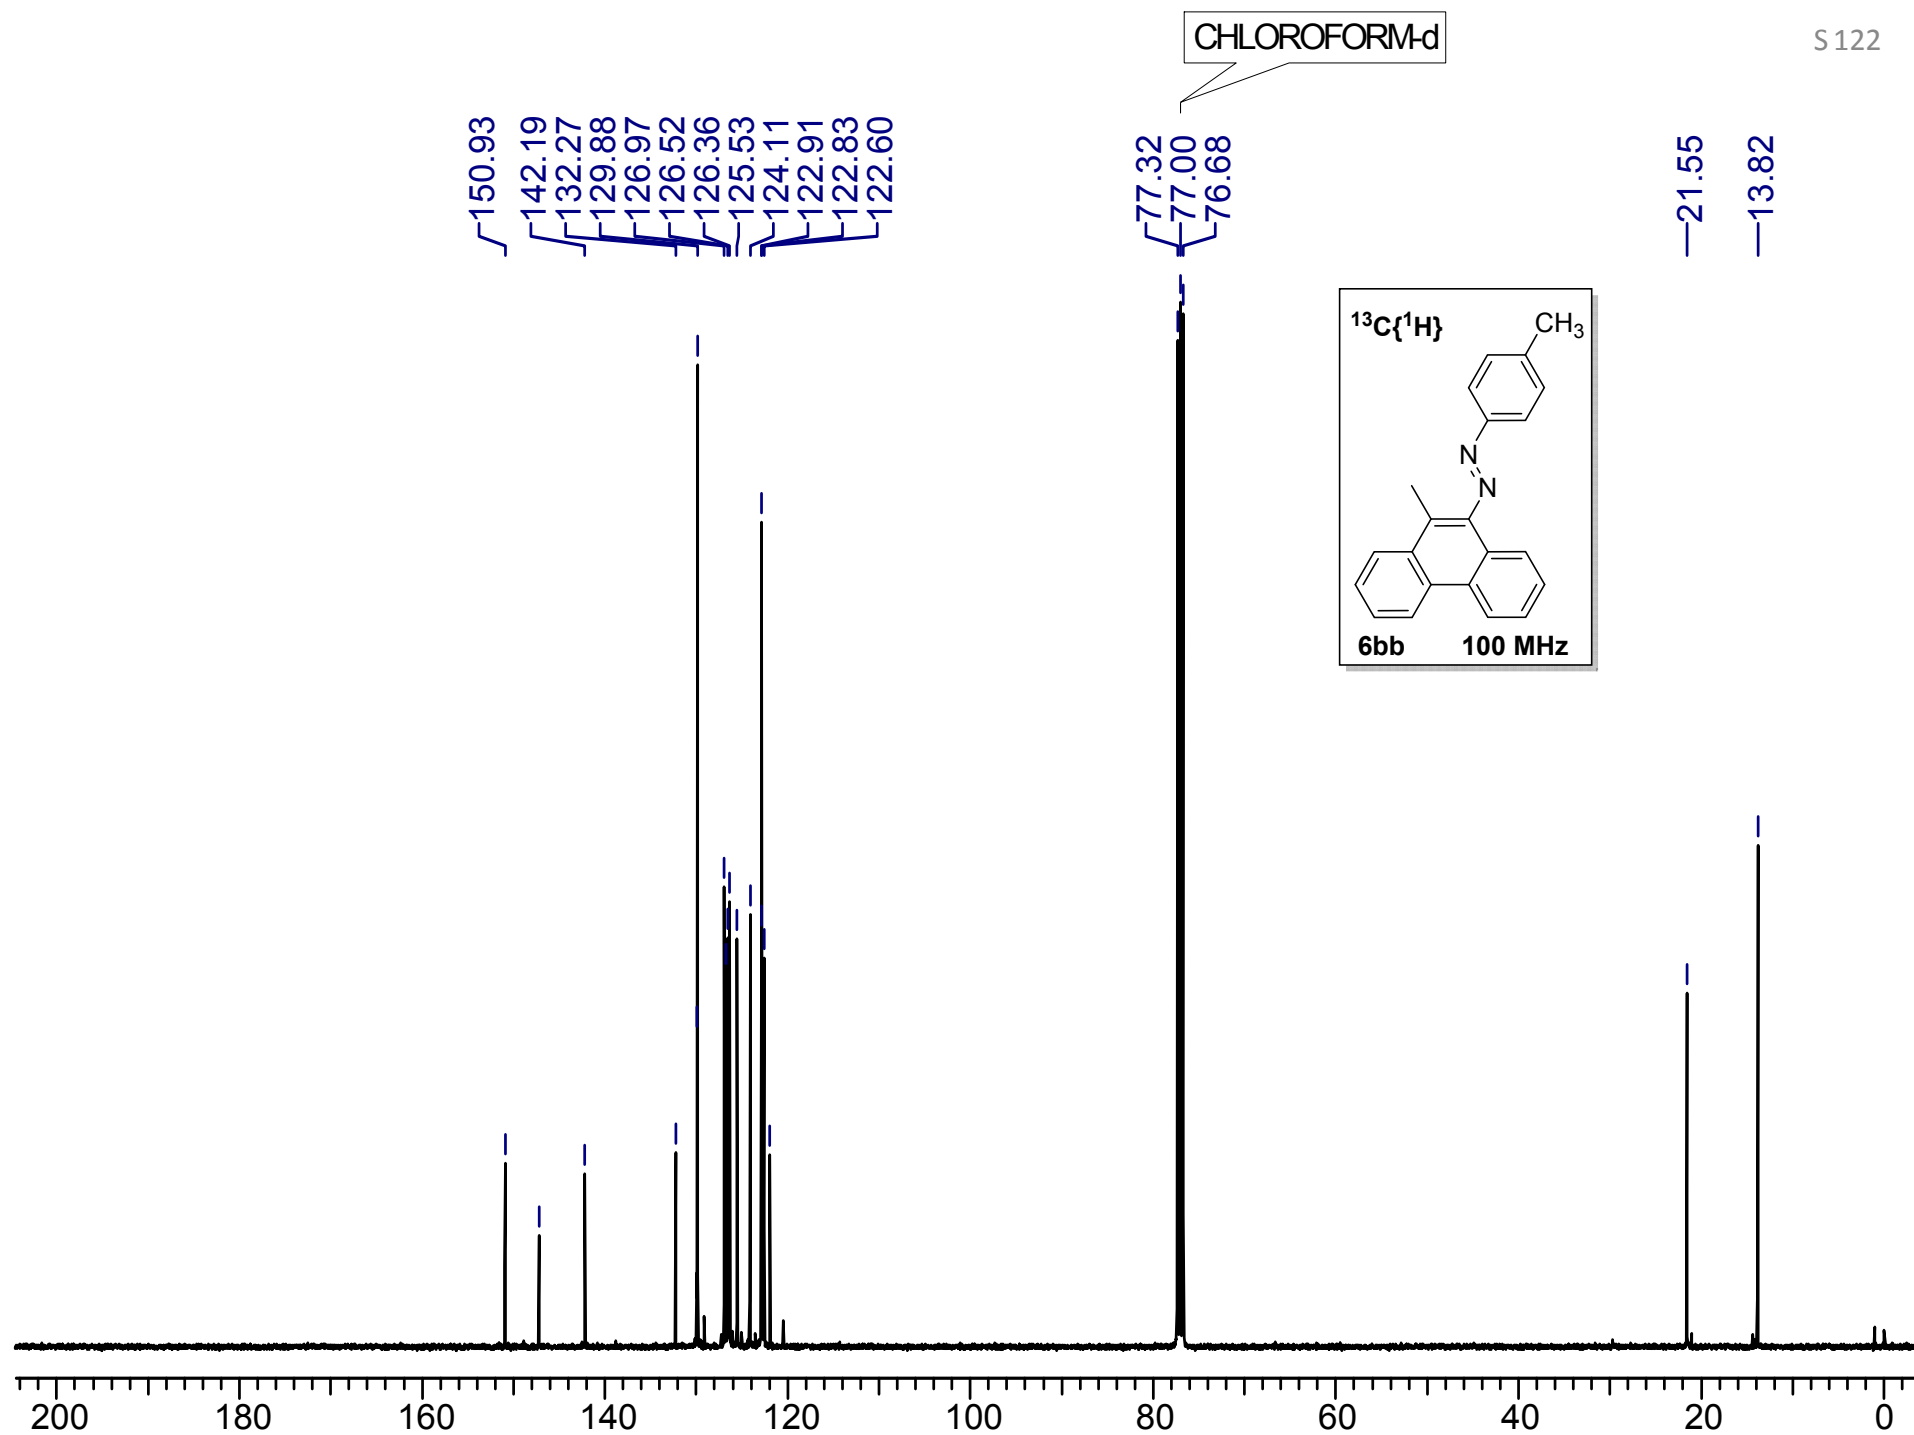

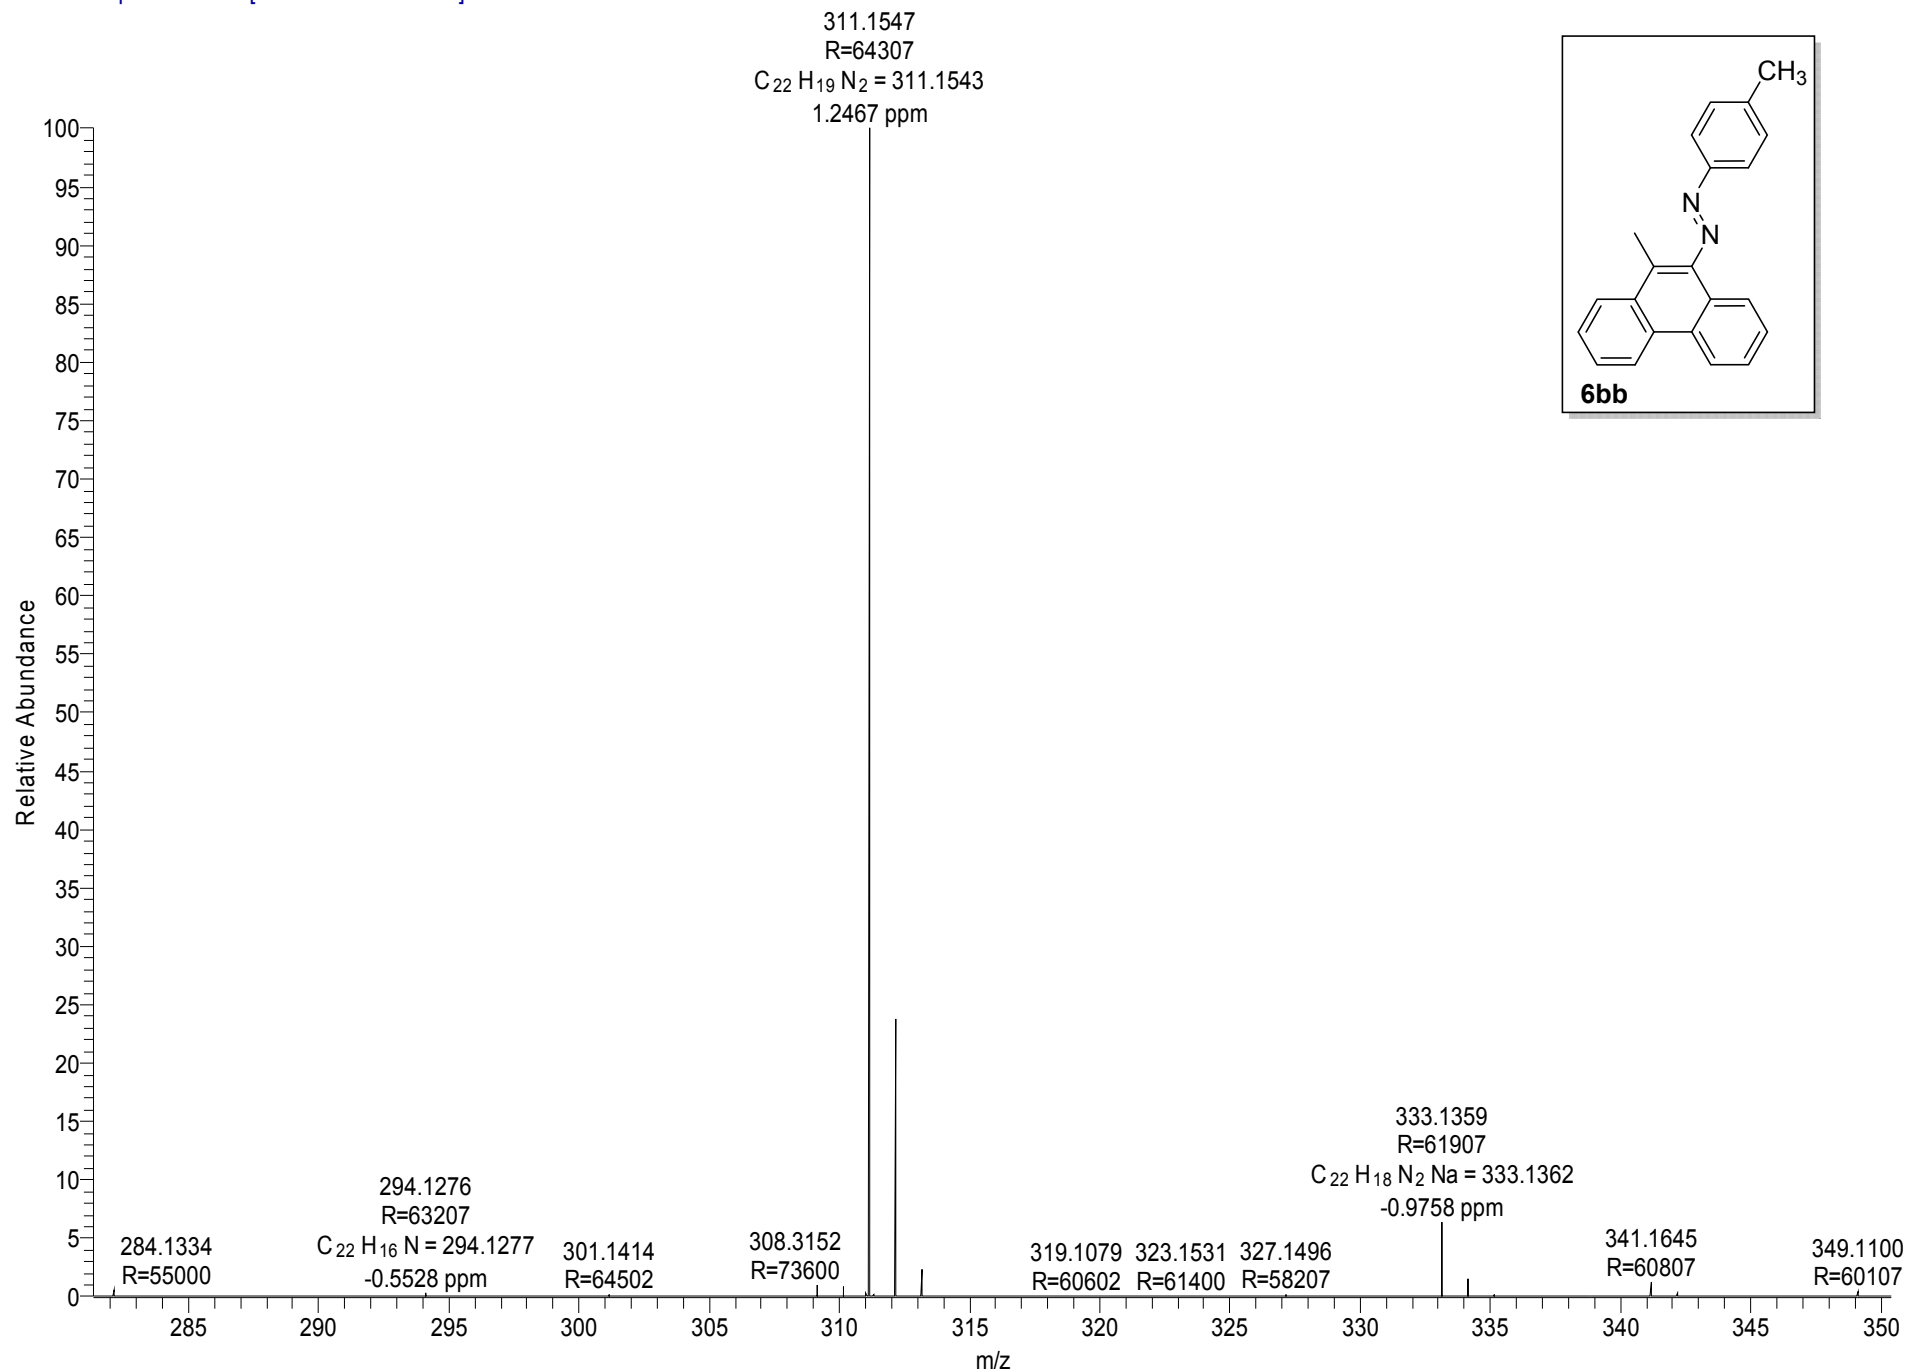

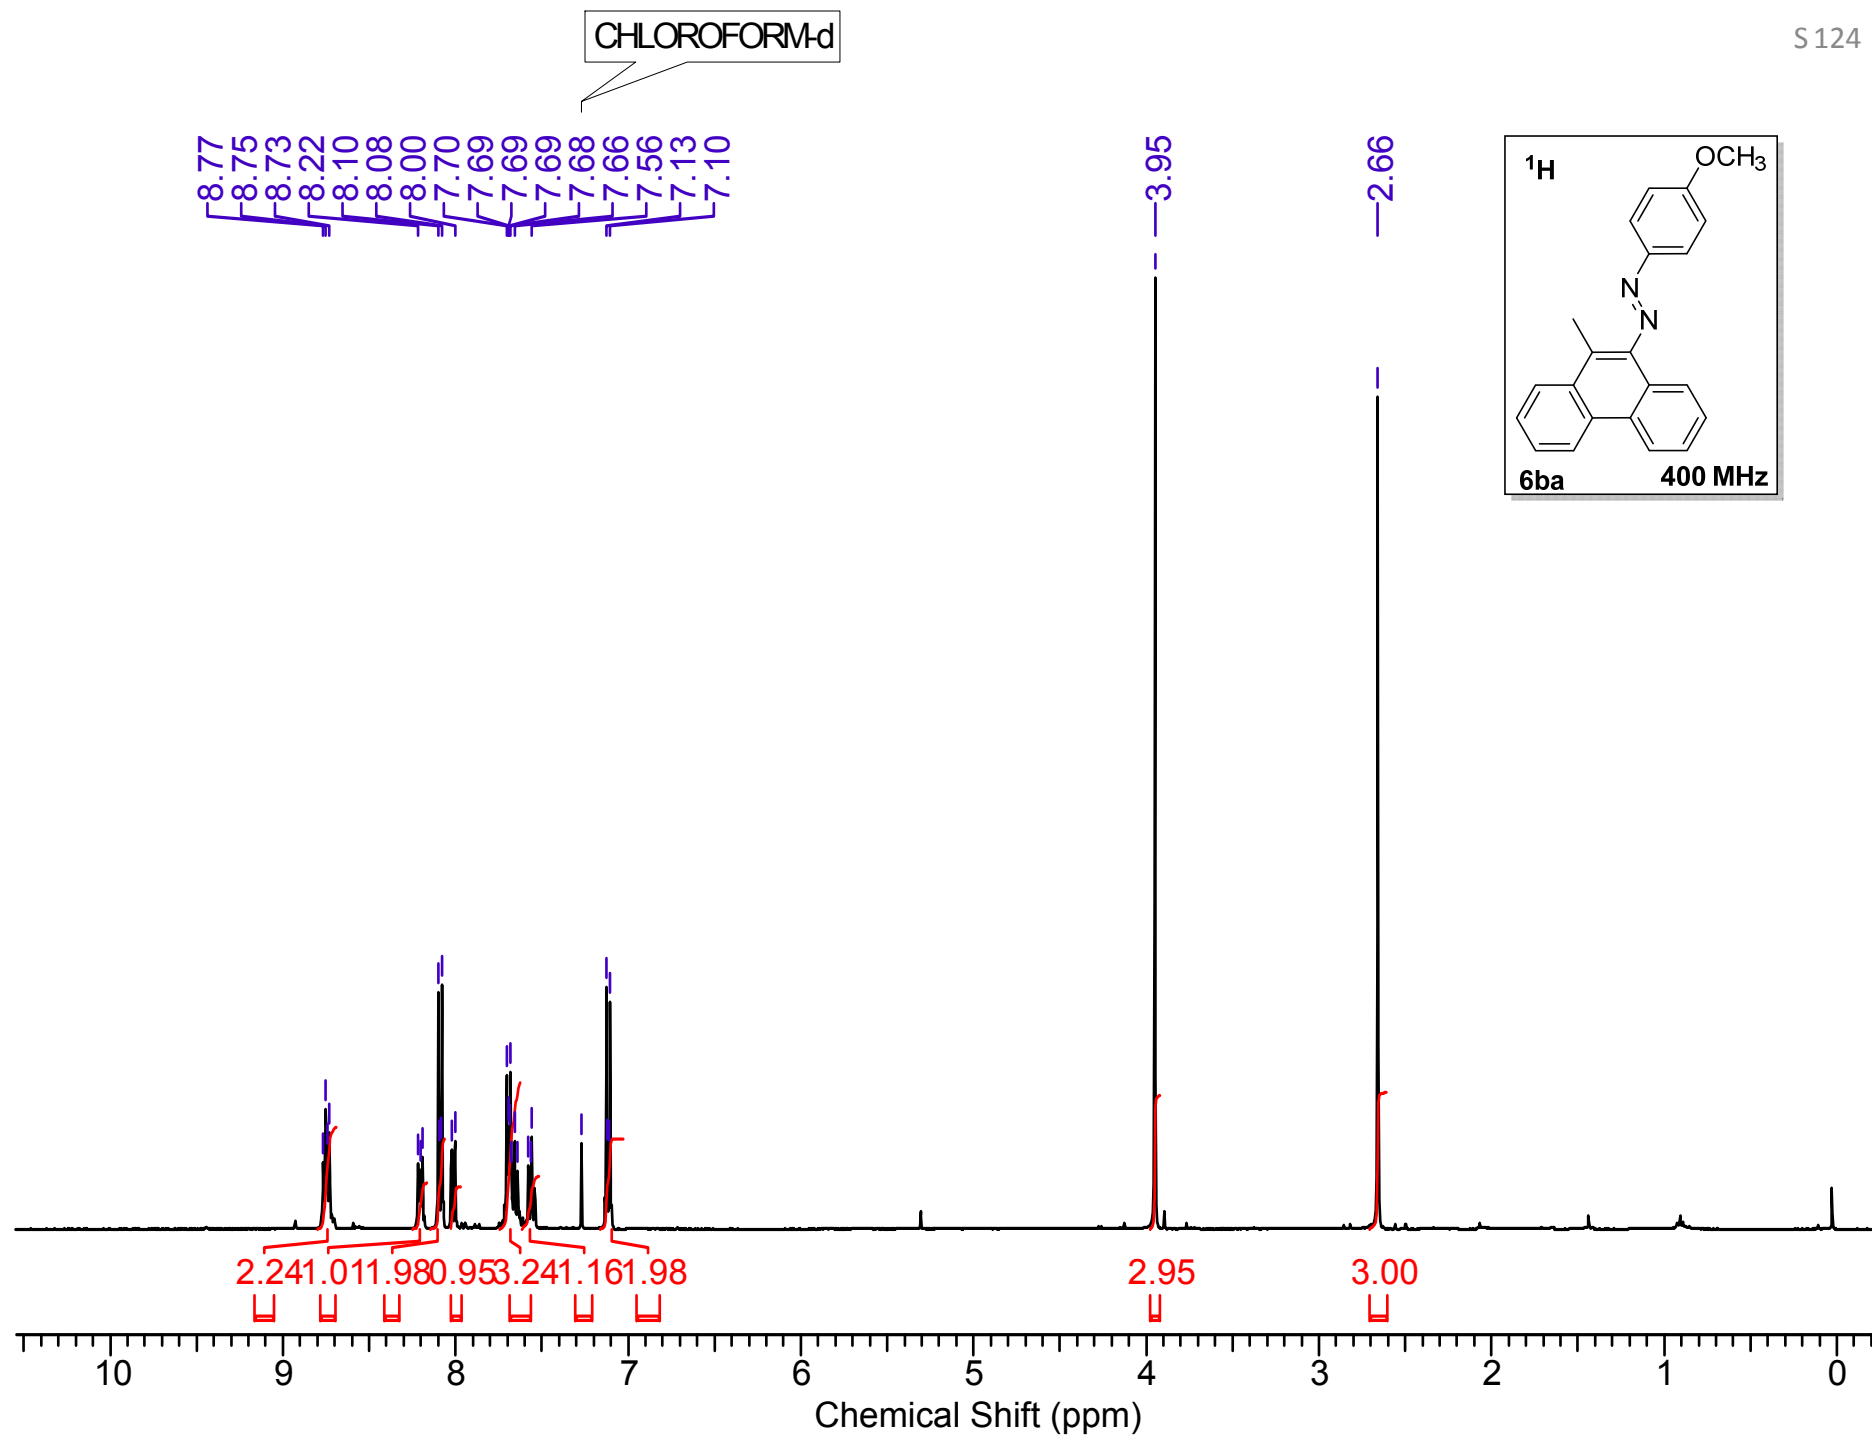

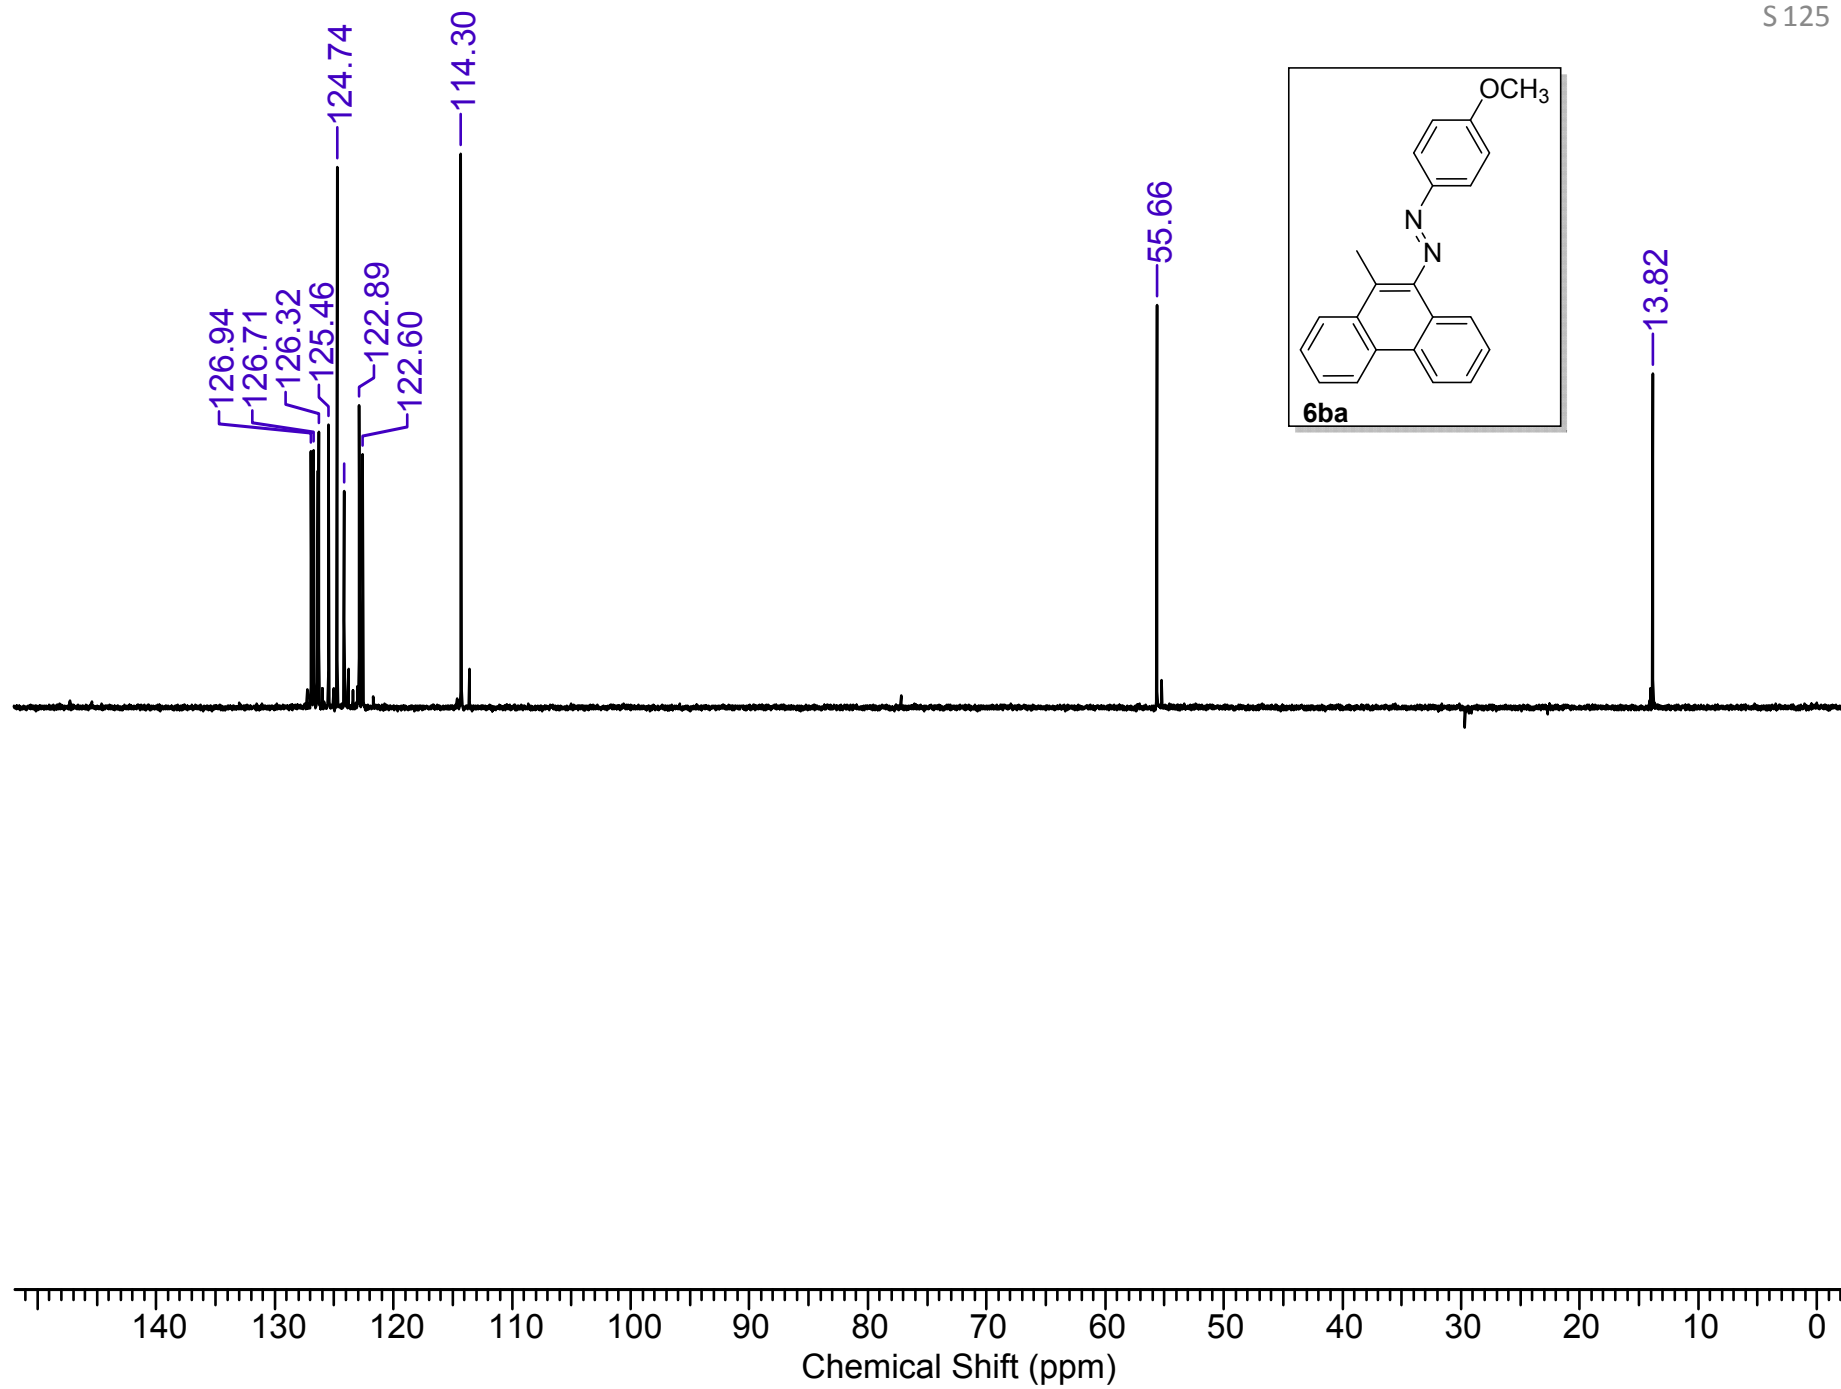

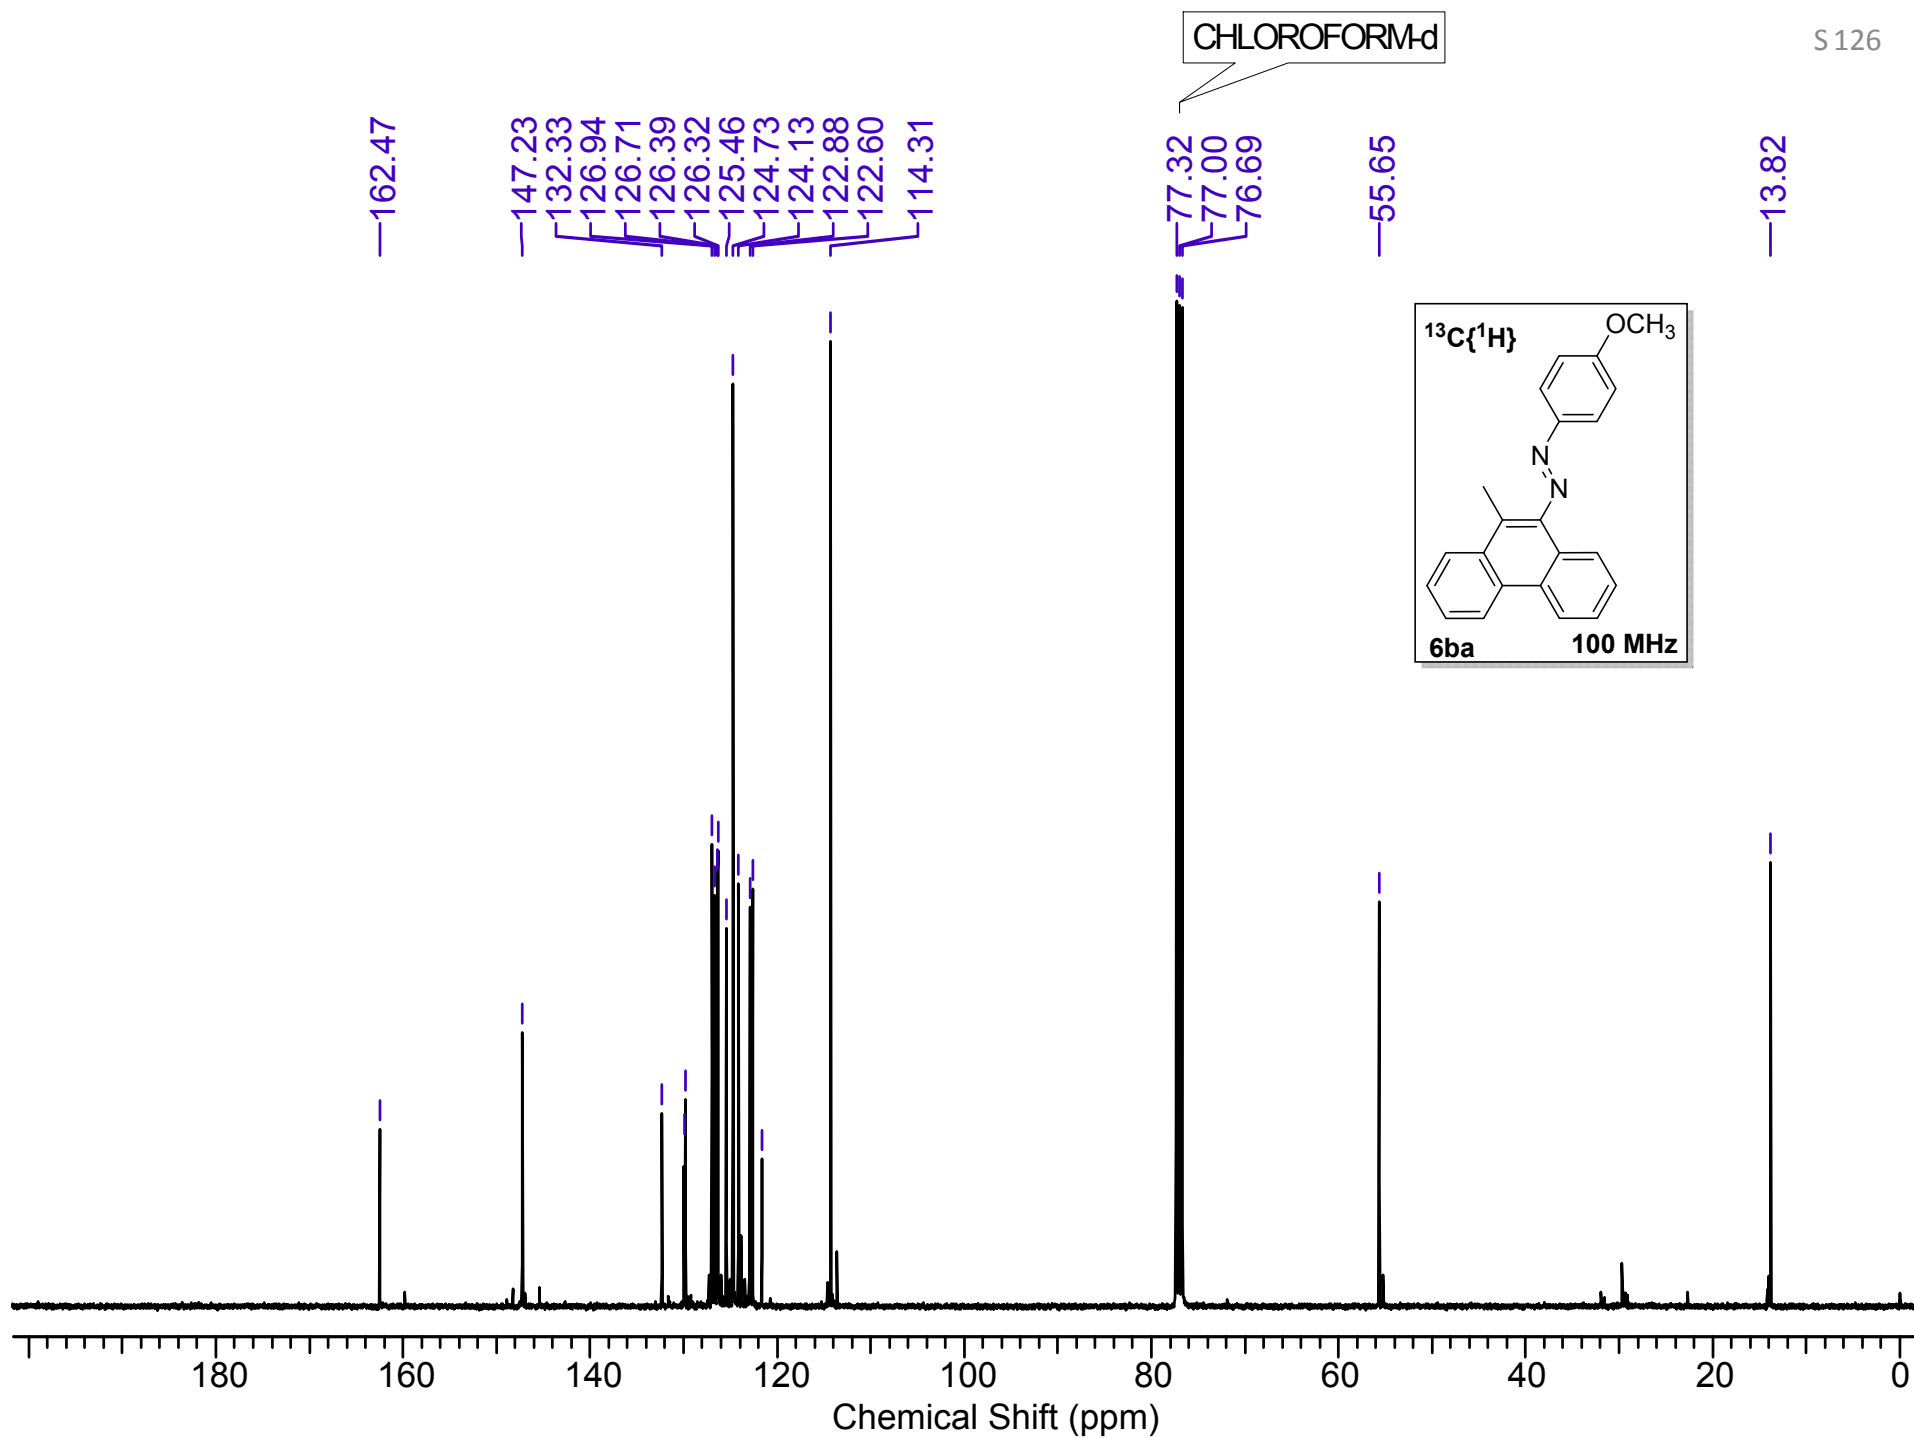

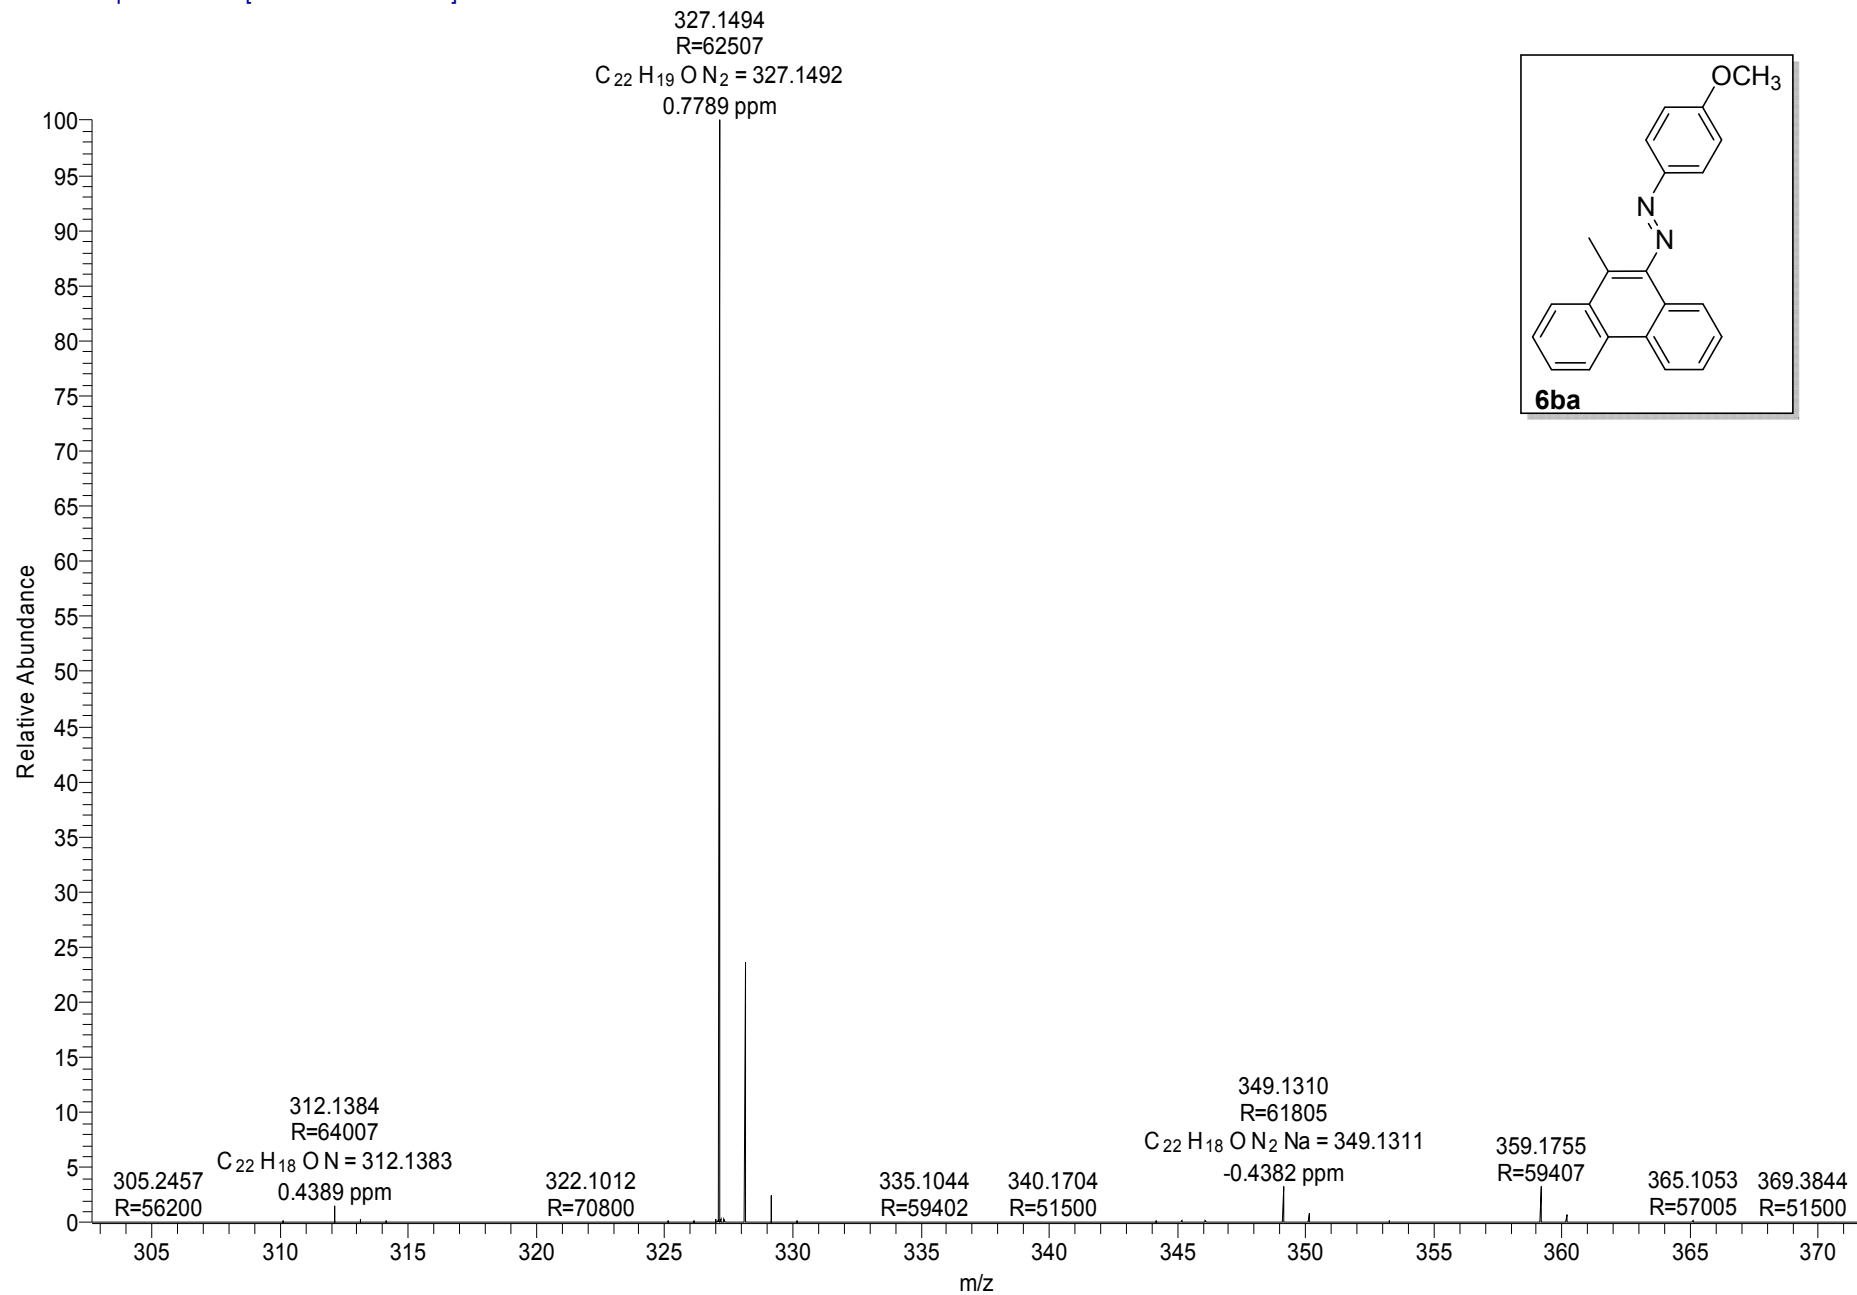

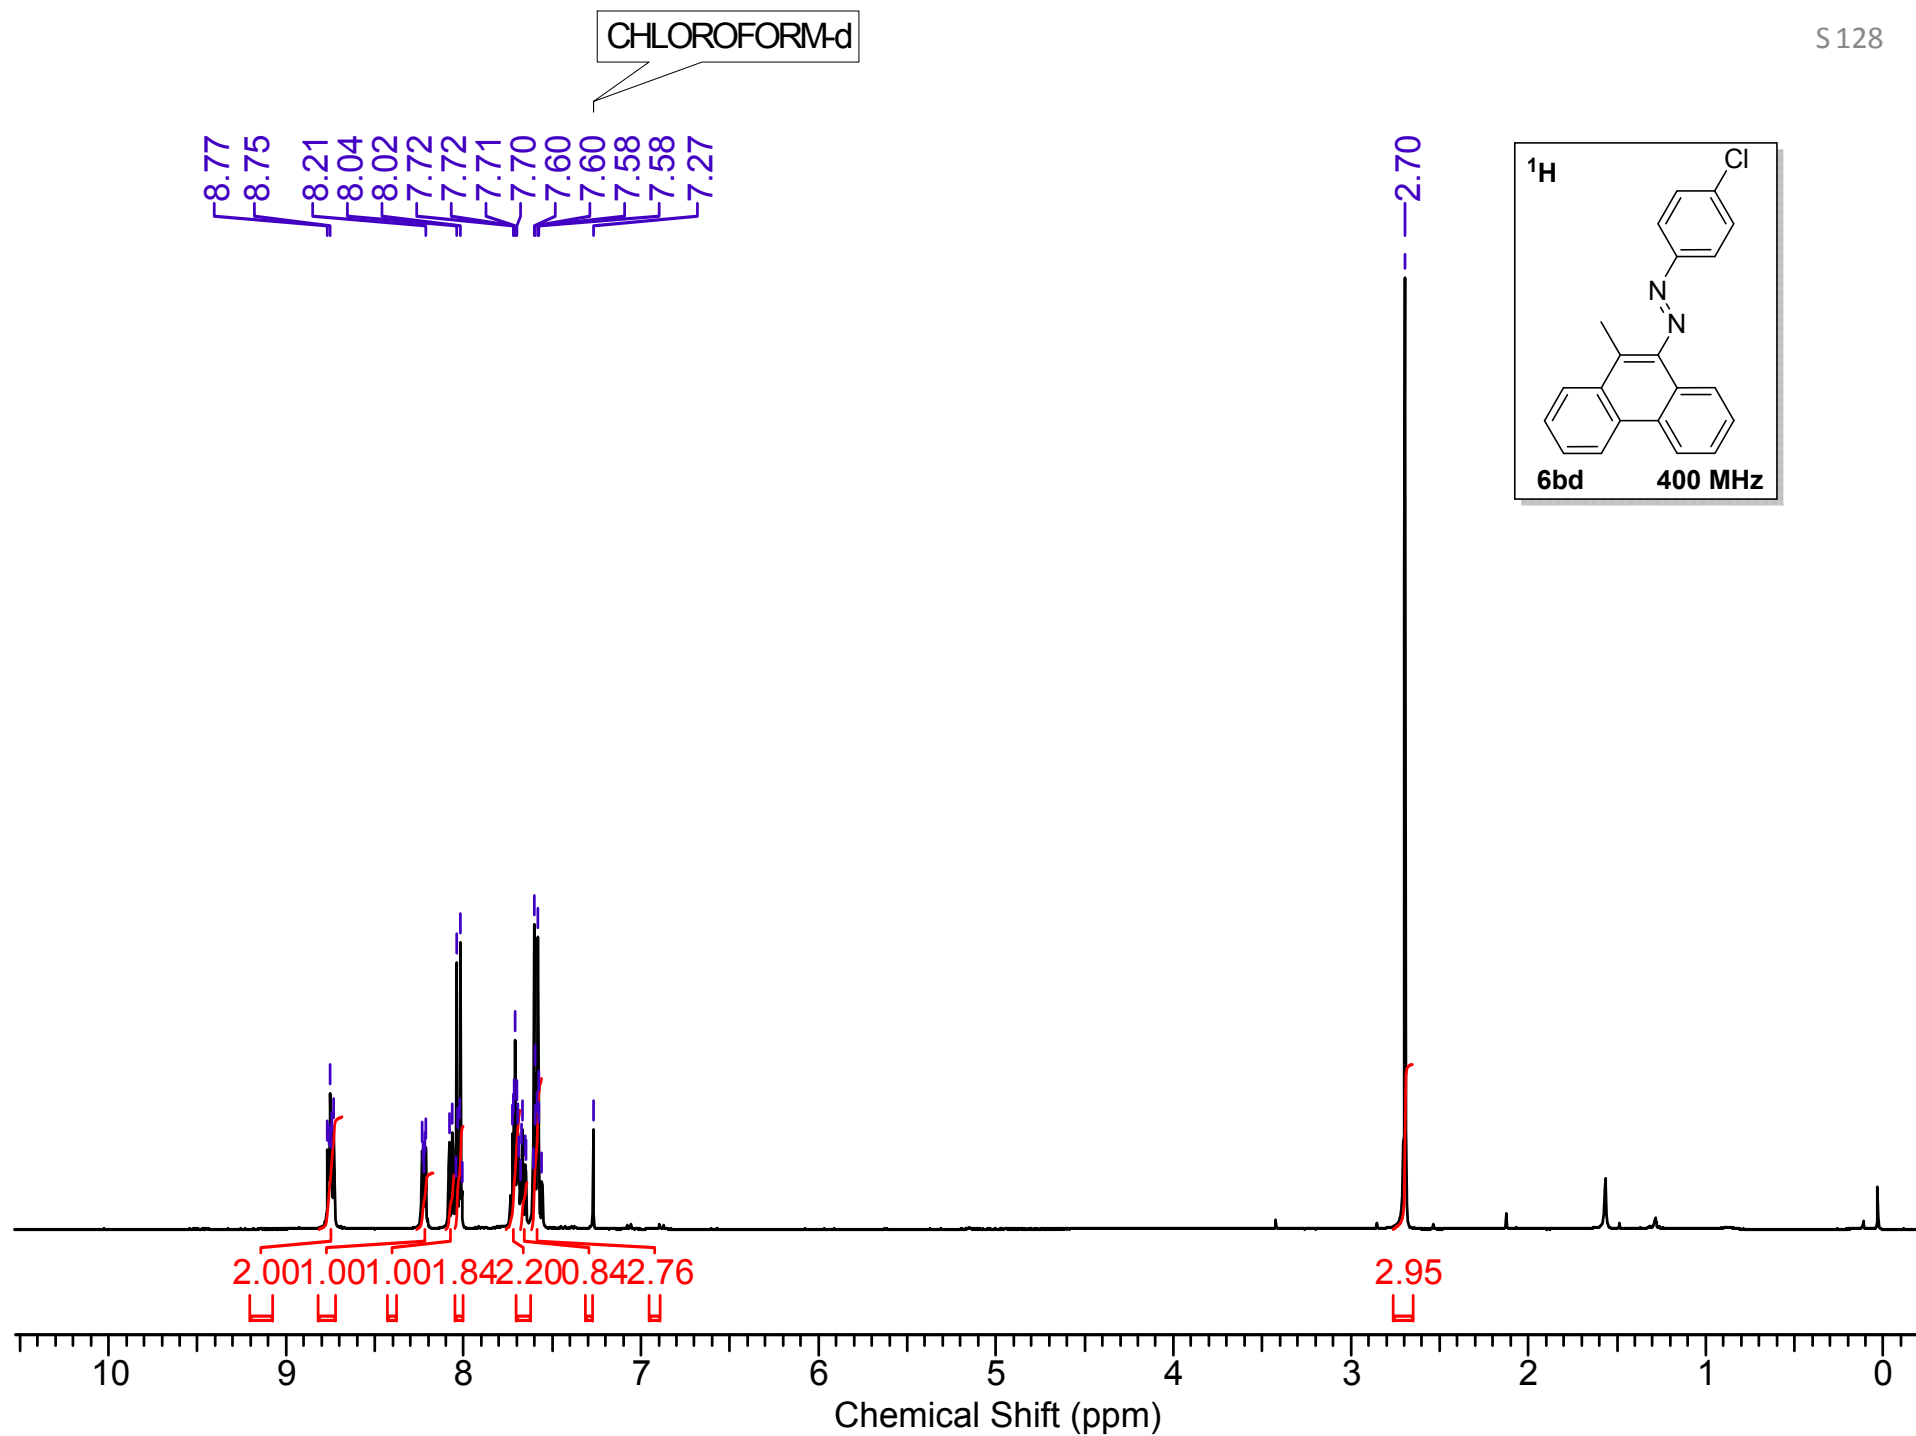



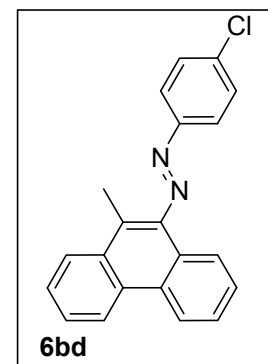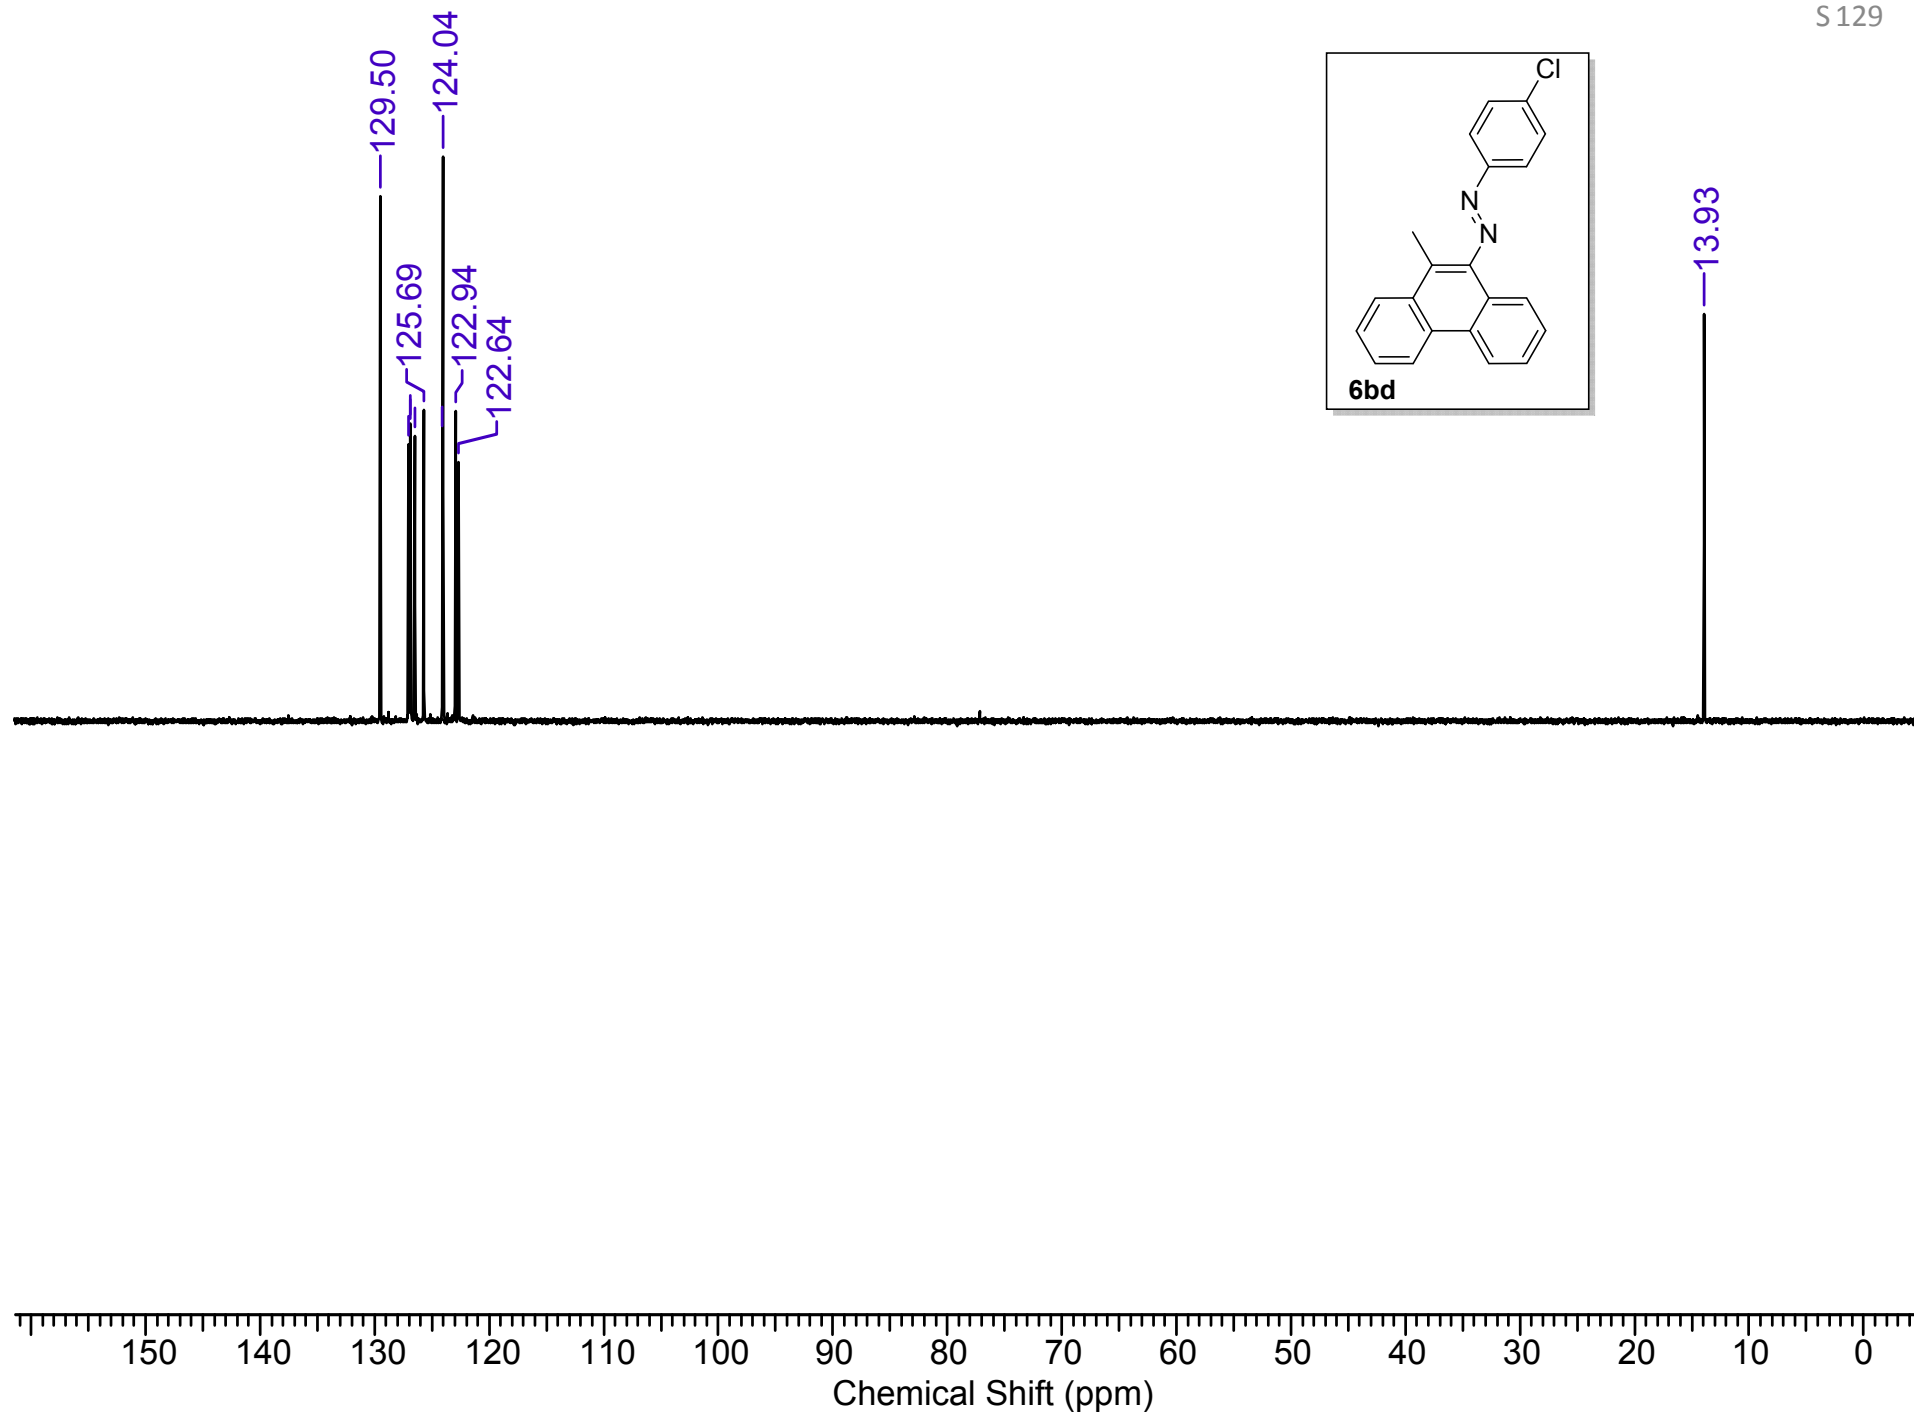

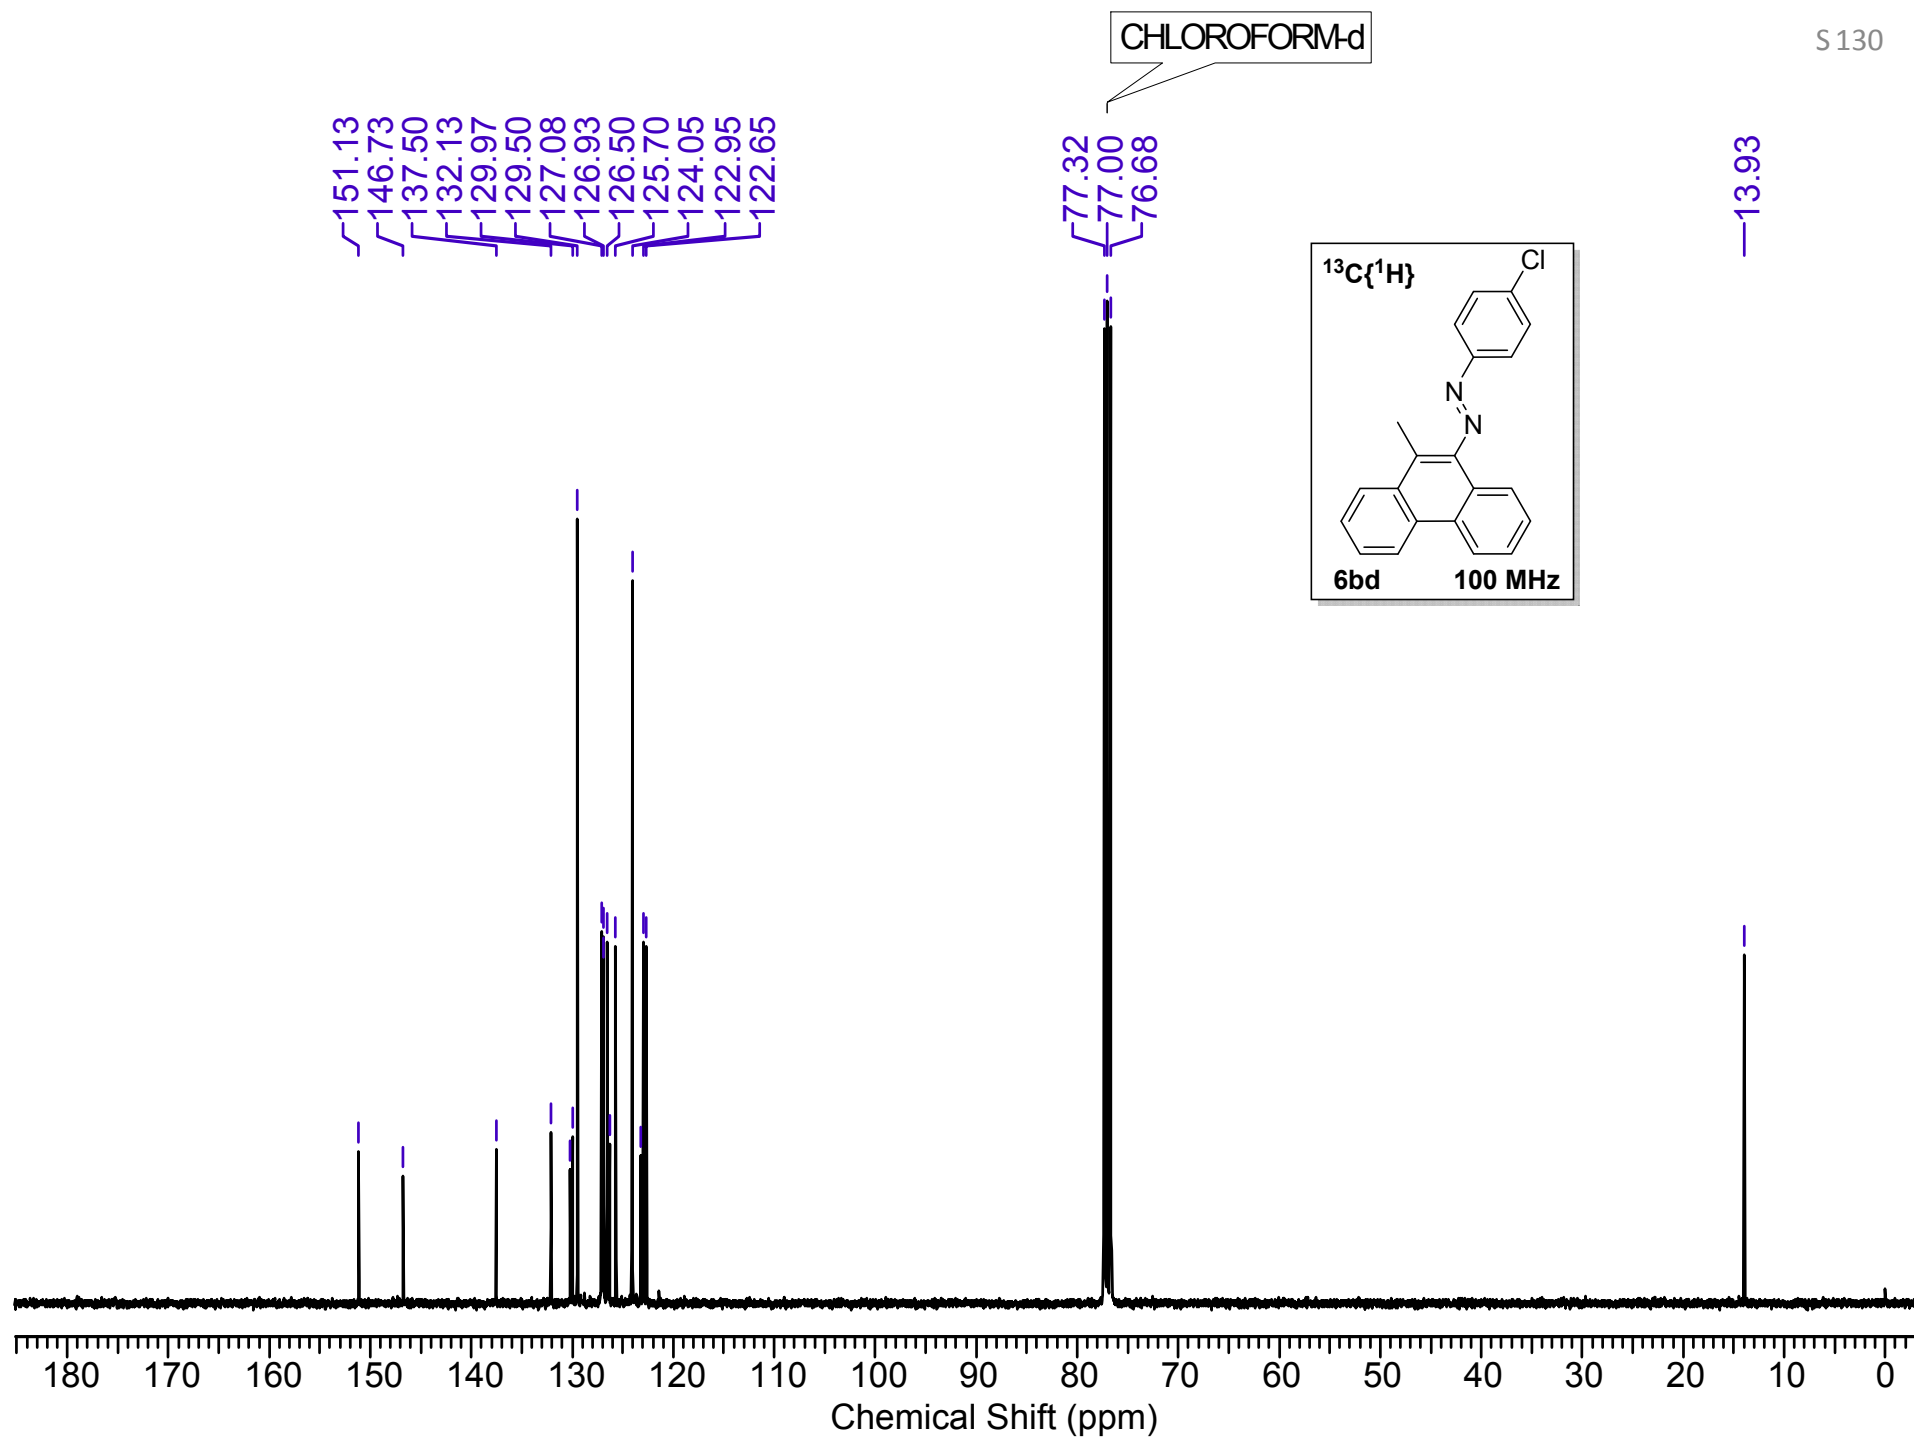

PSD-879 #346 RT: 2.12 AV: 1 NL: 1.07E6  
T: FTMS + p ESI Full ms [100.0000-1500.0000]

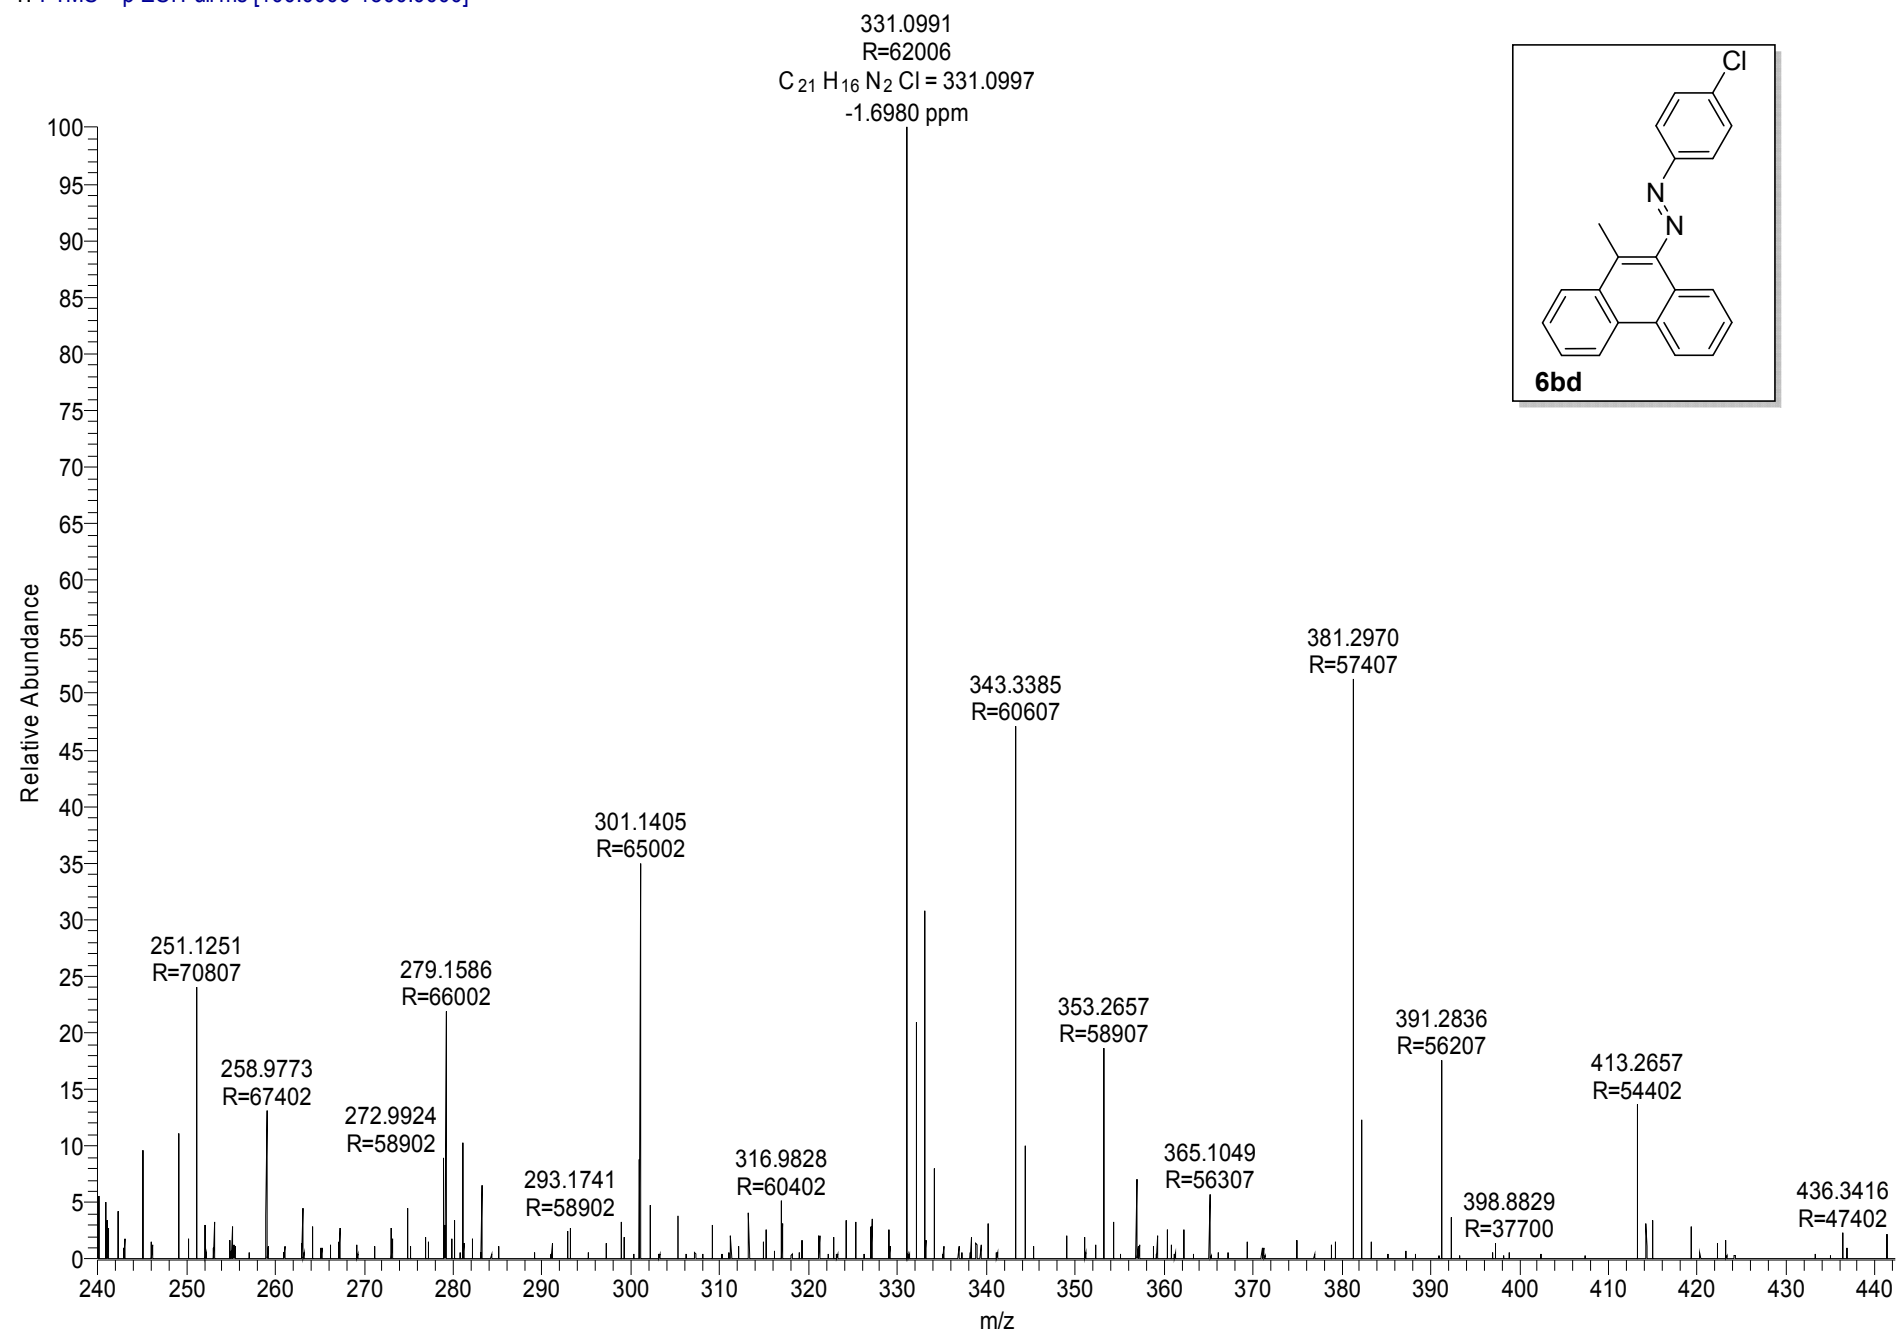

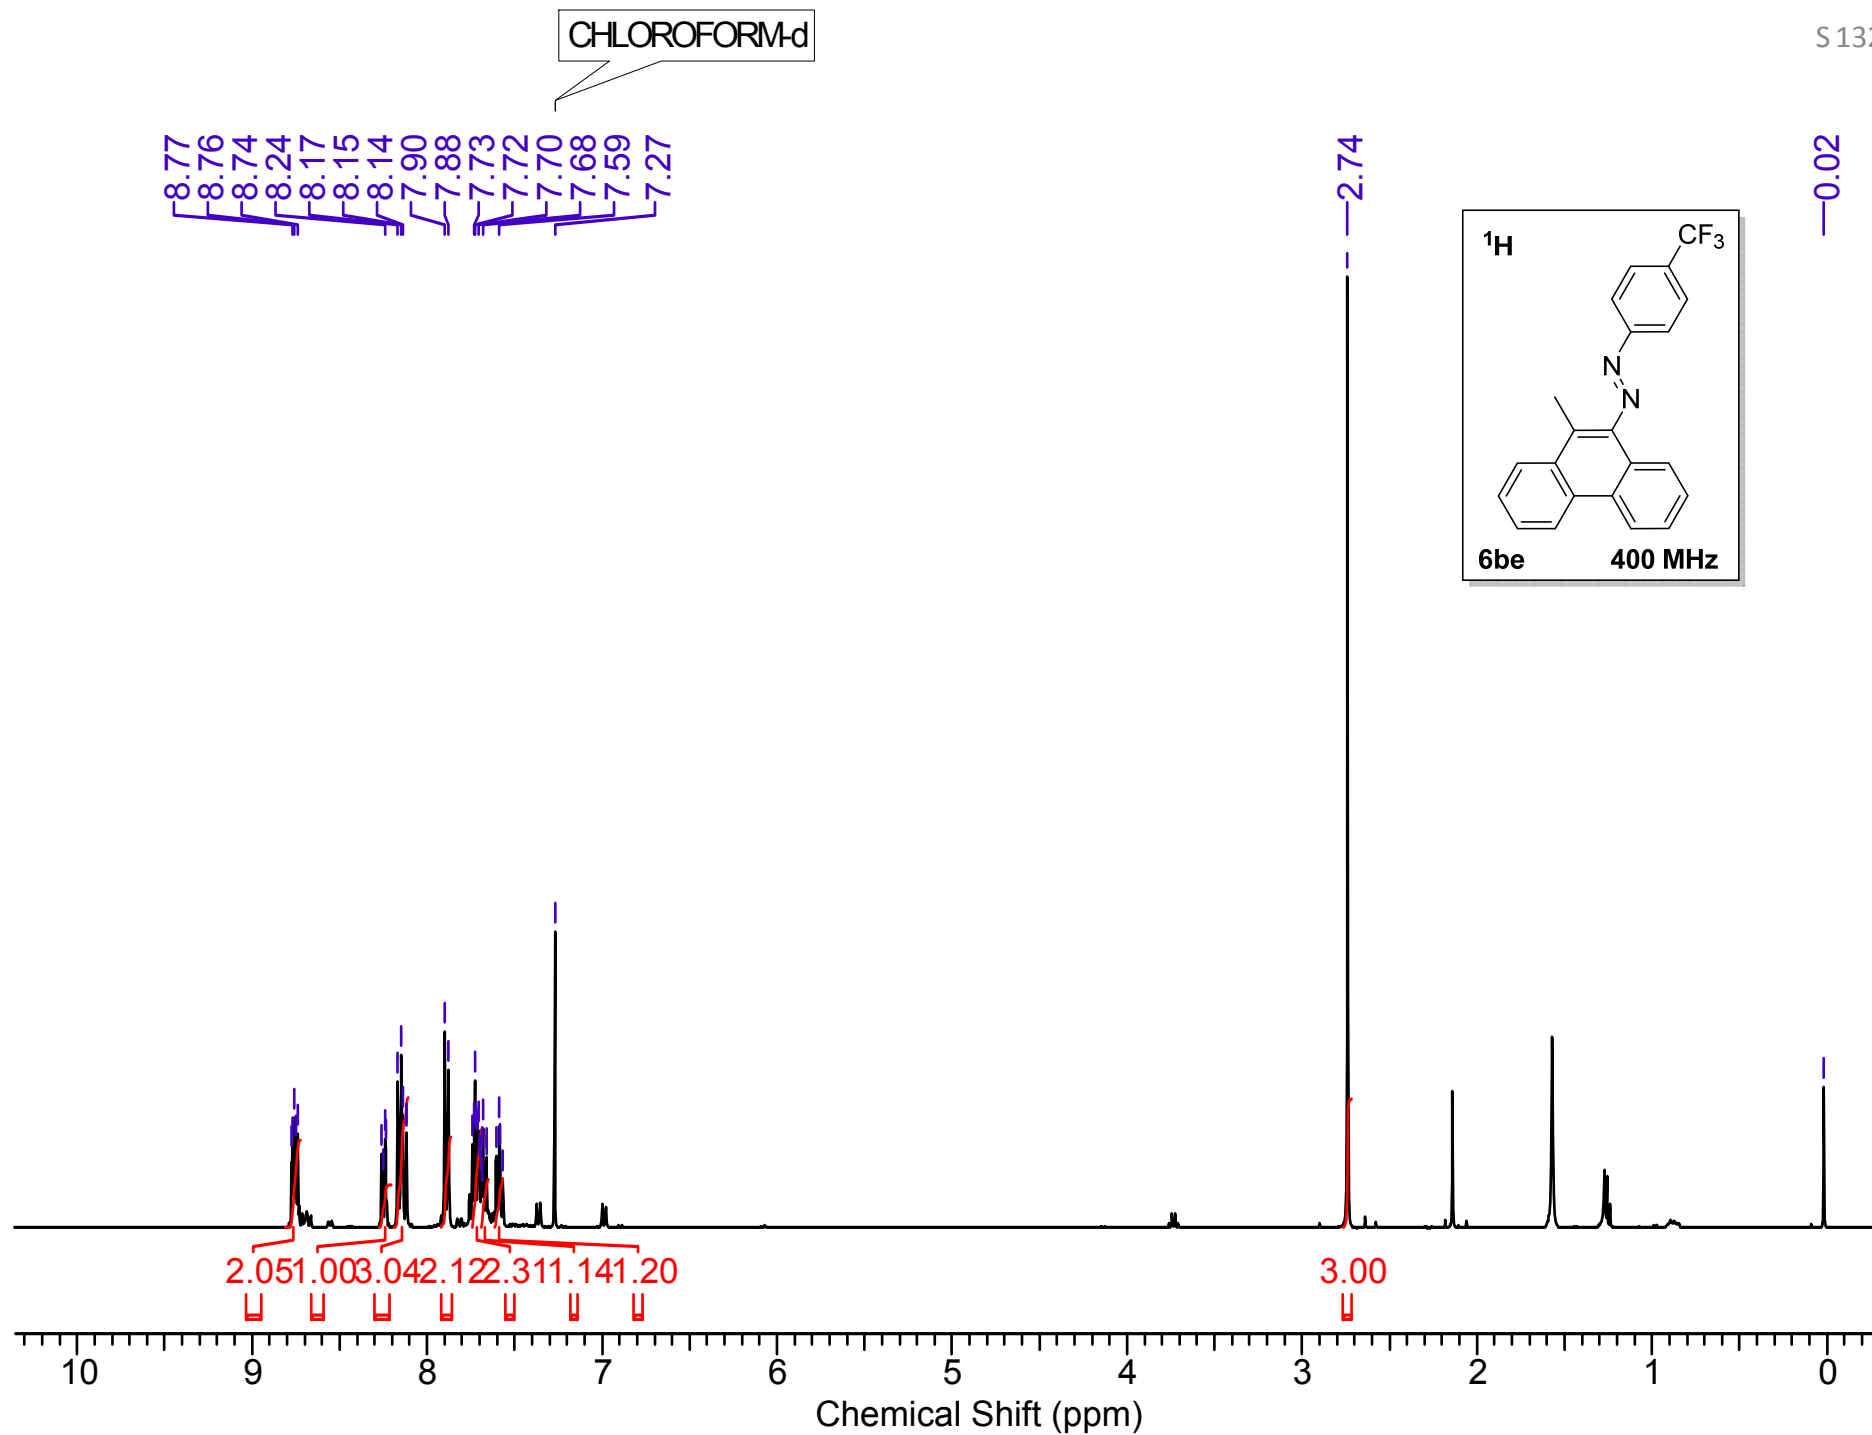

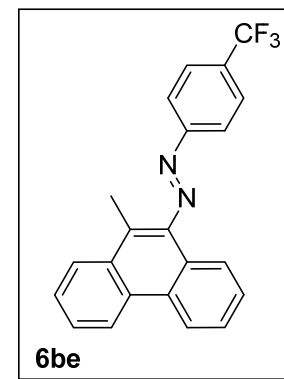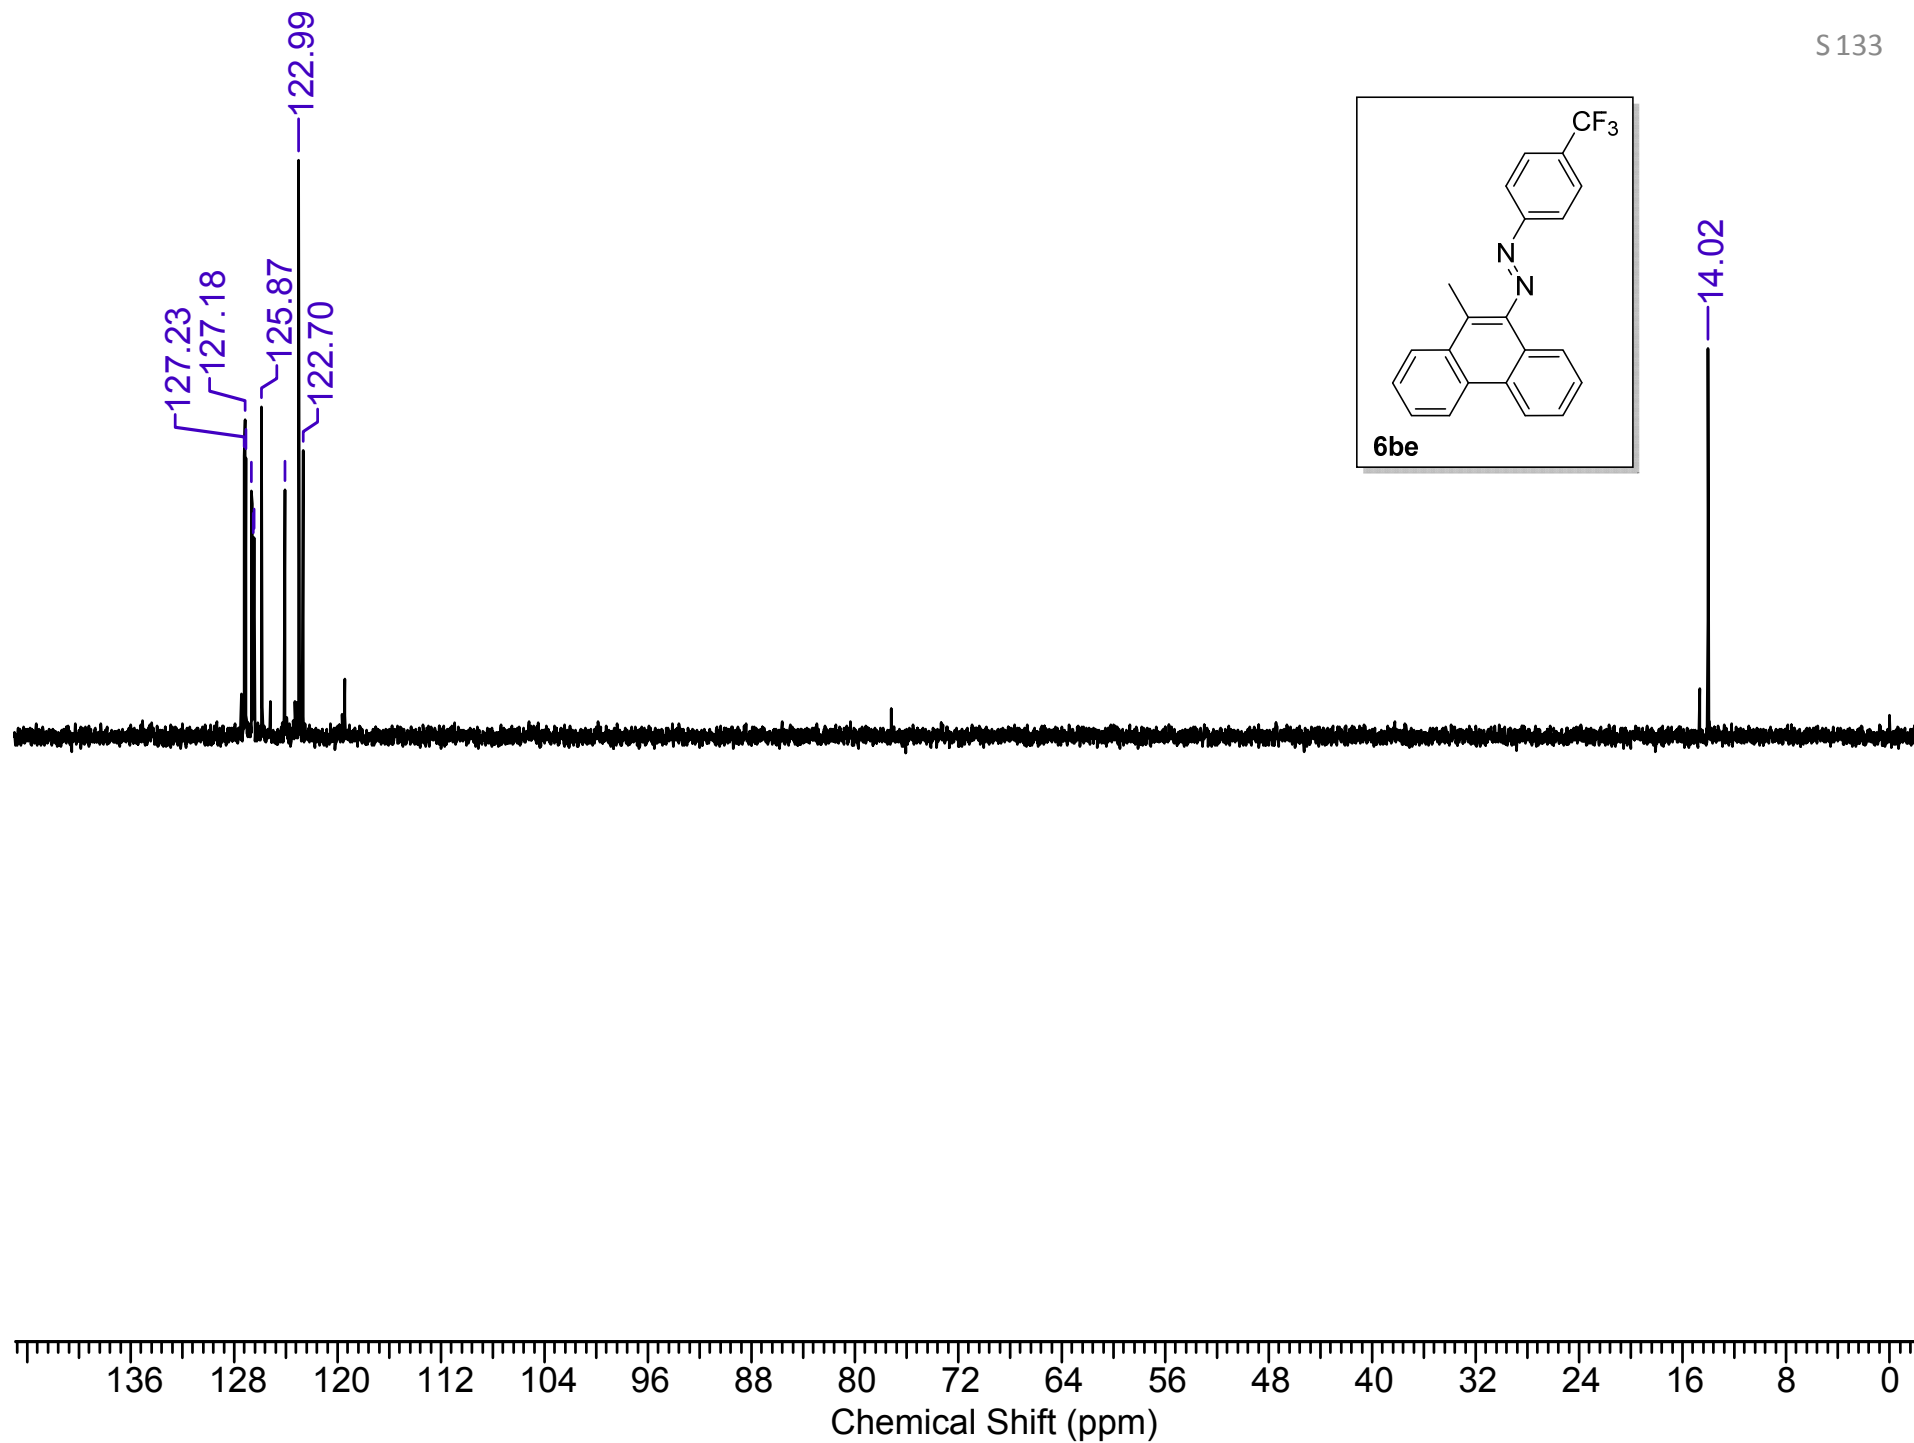

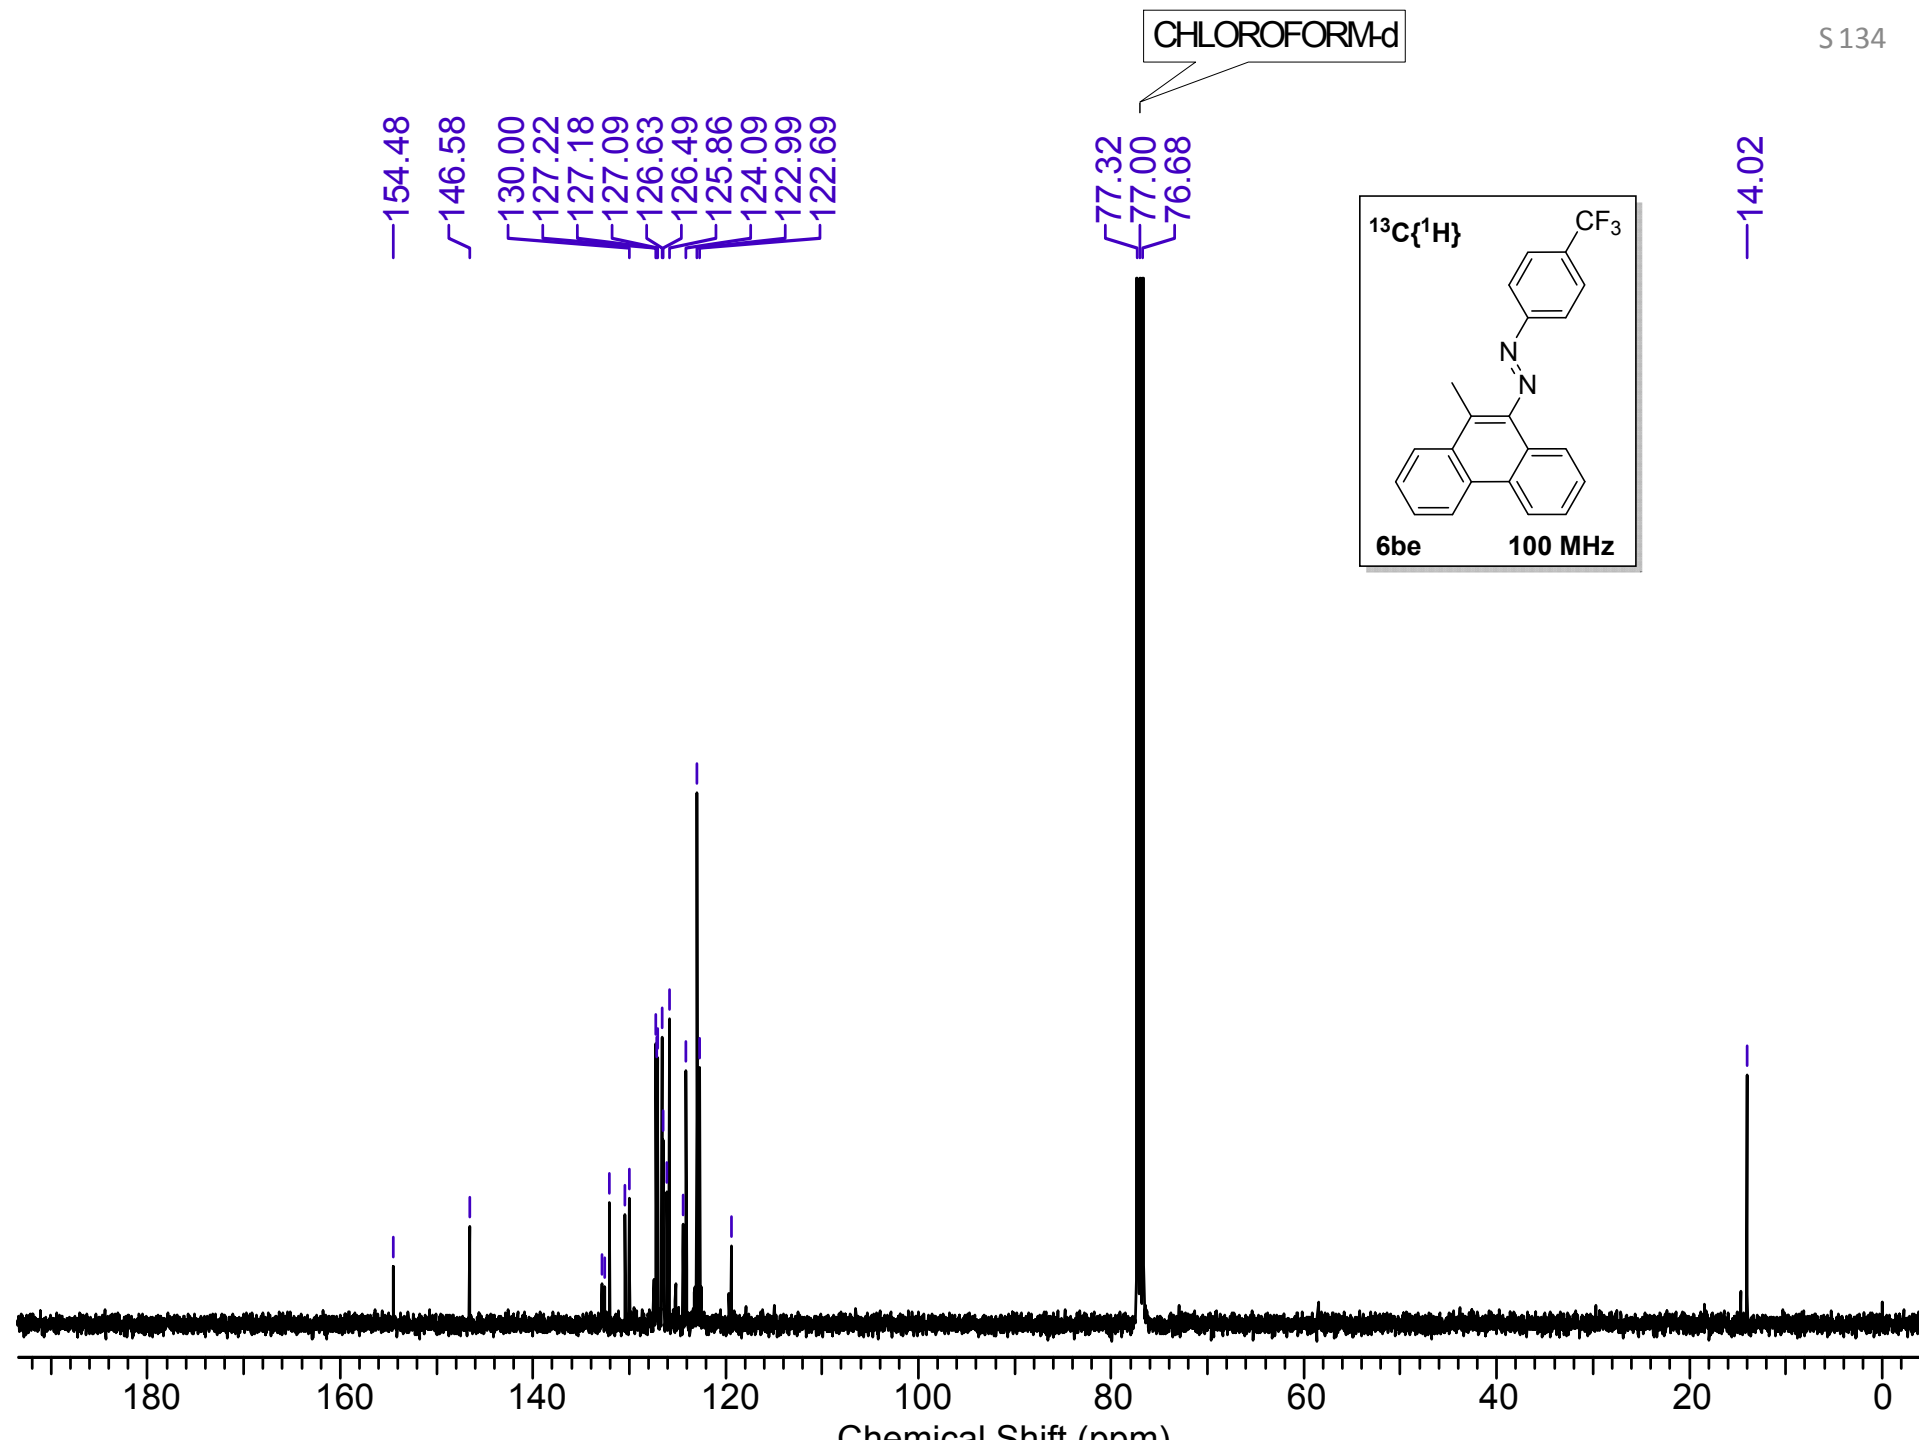

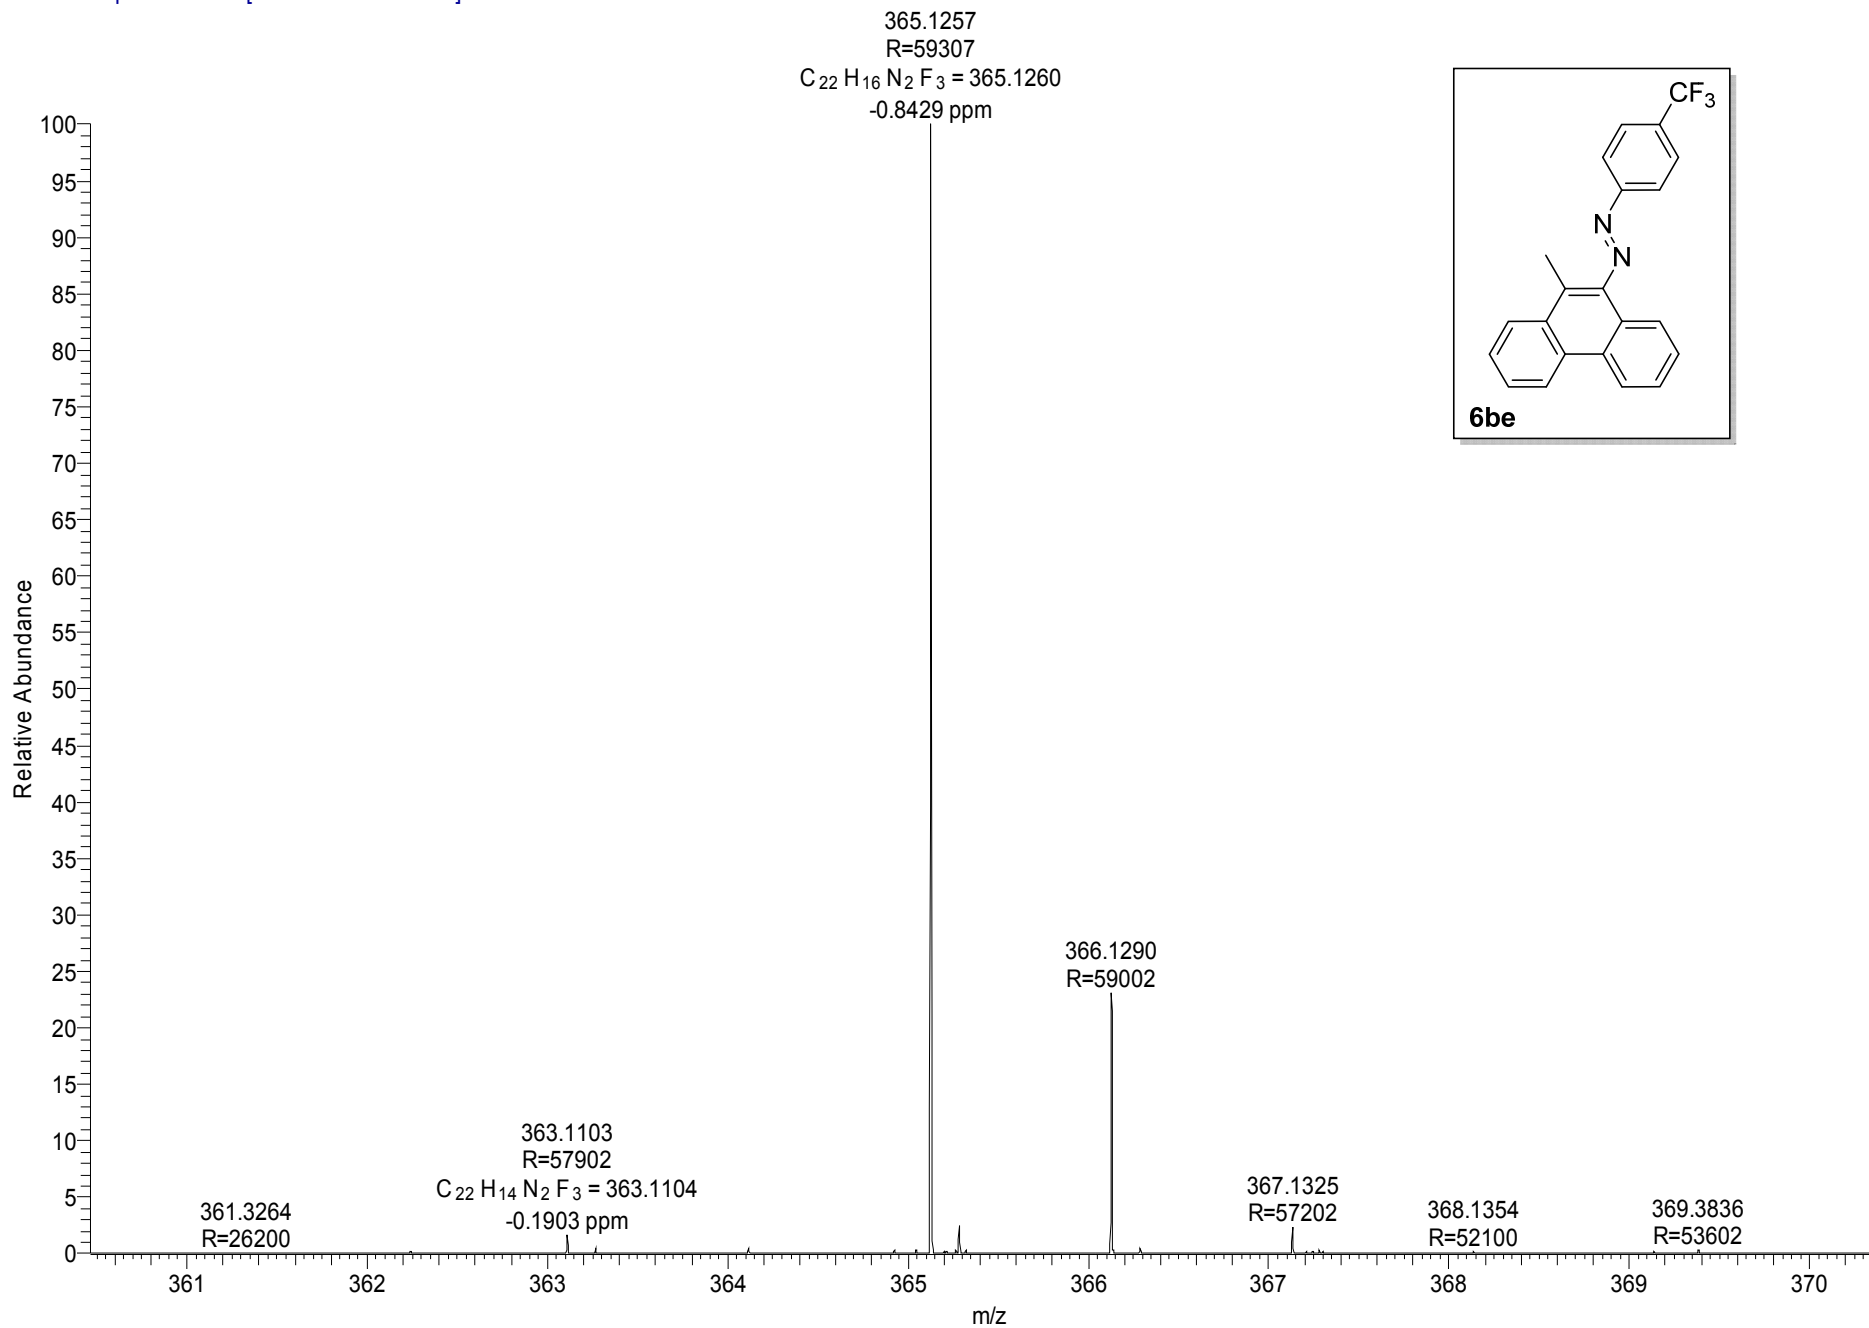

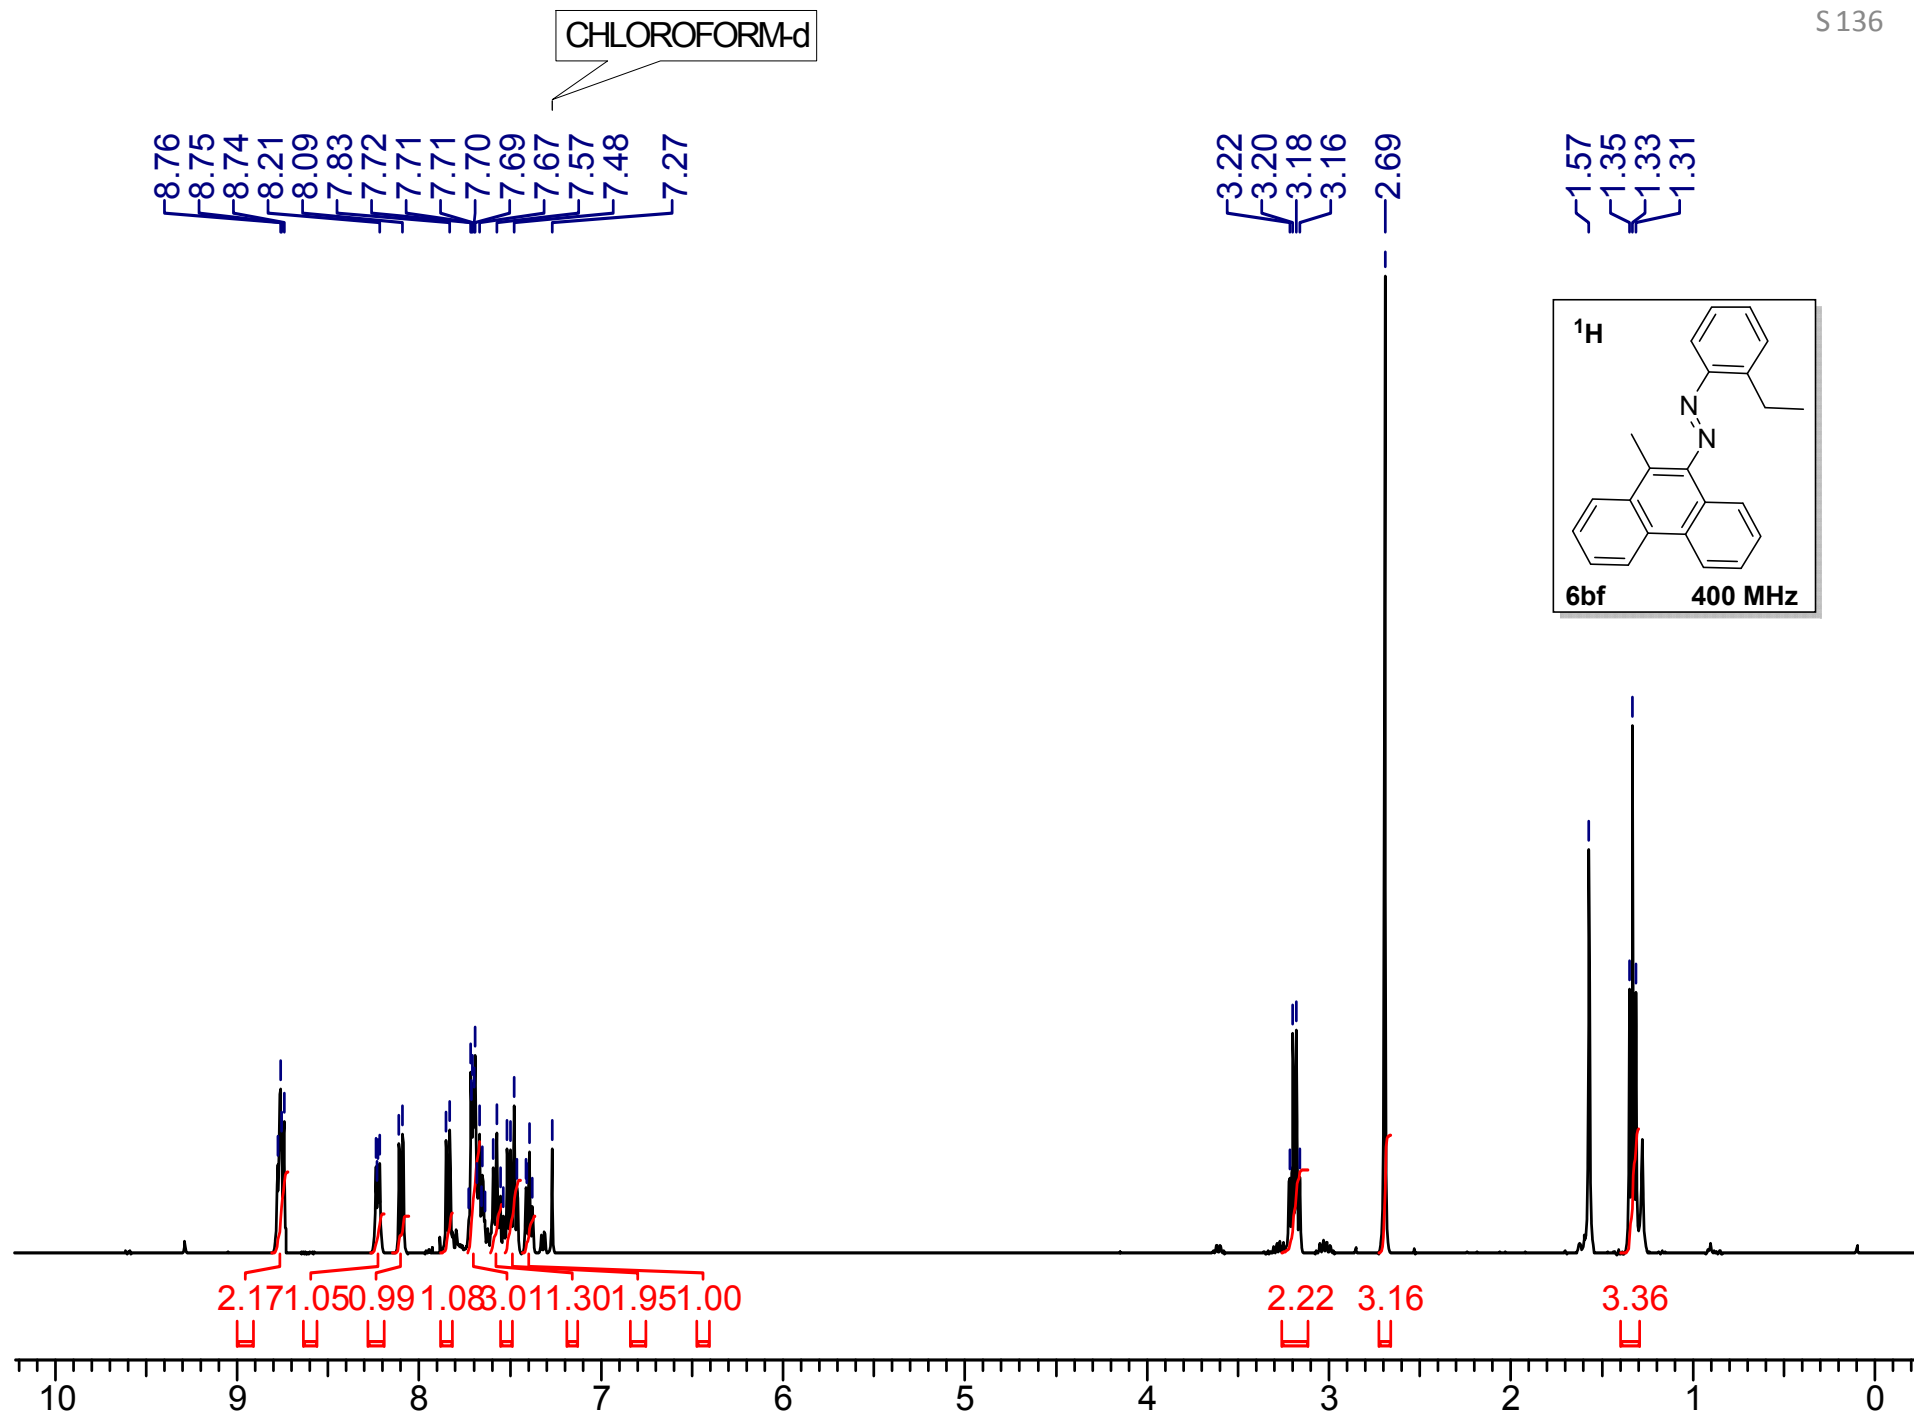



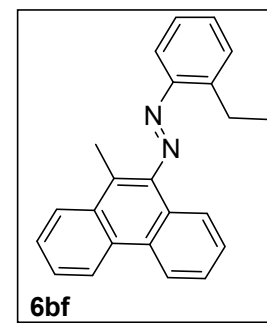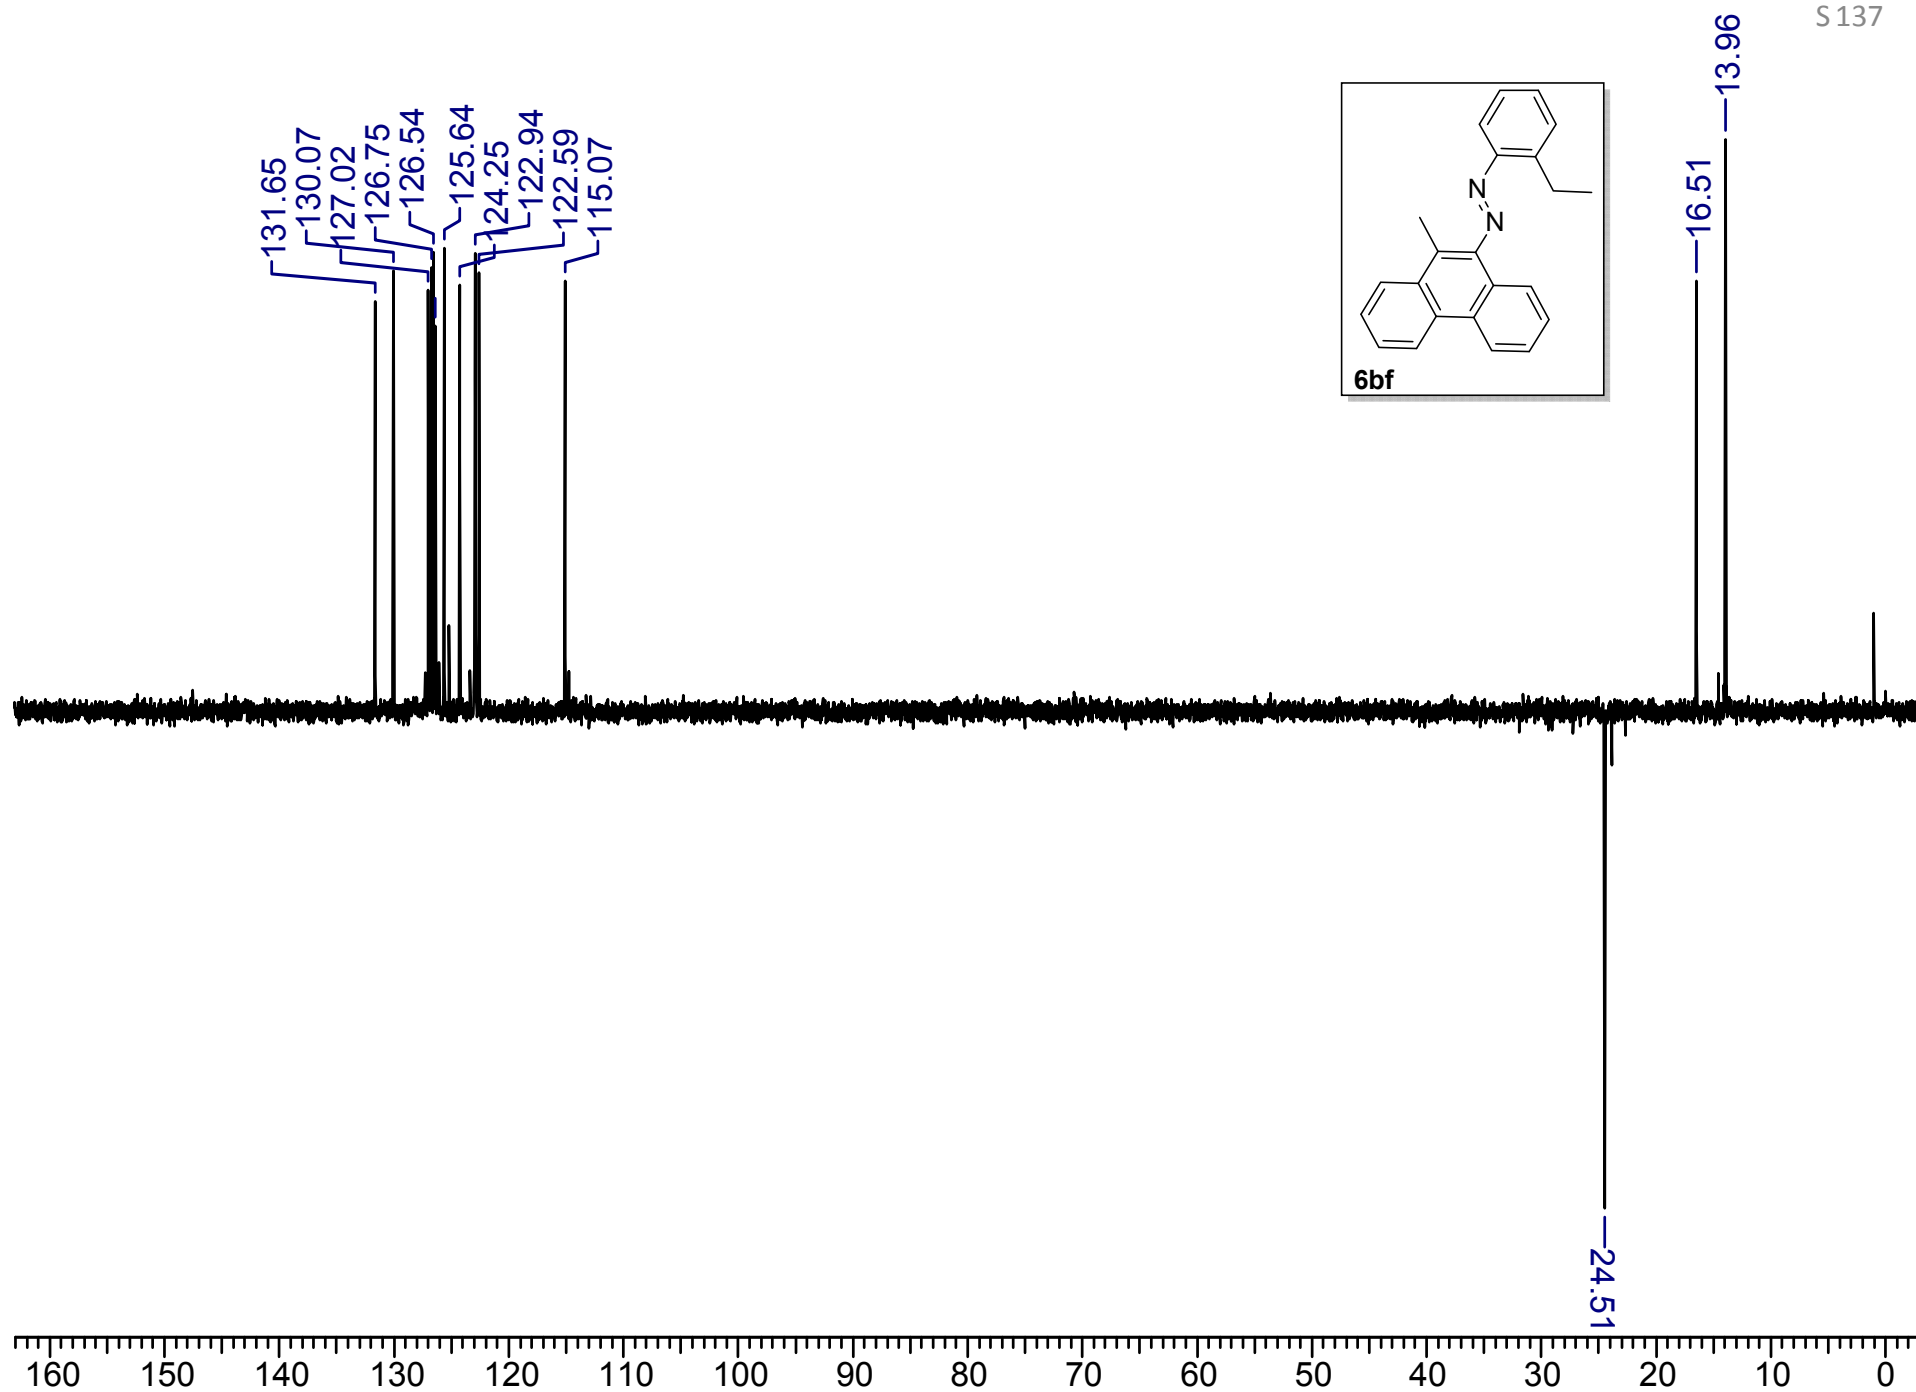

CHLOROFORM-d

S 138

150.47  
147.52  
144.65  
131.65  
130.07  
130.03  
127.02  
126.59  
126.37  
125.64  
124.24  
122.94  
122.60  
115.07

77.32  
77.00  
76.69

24.50  
16.51  
13.96

1.01

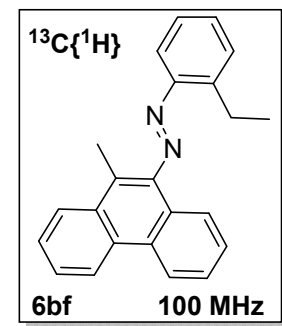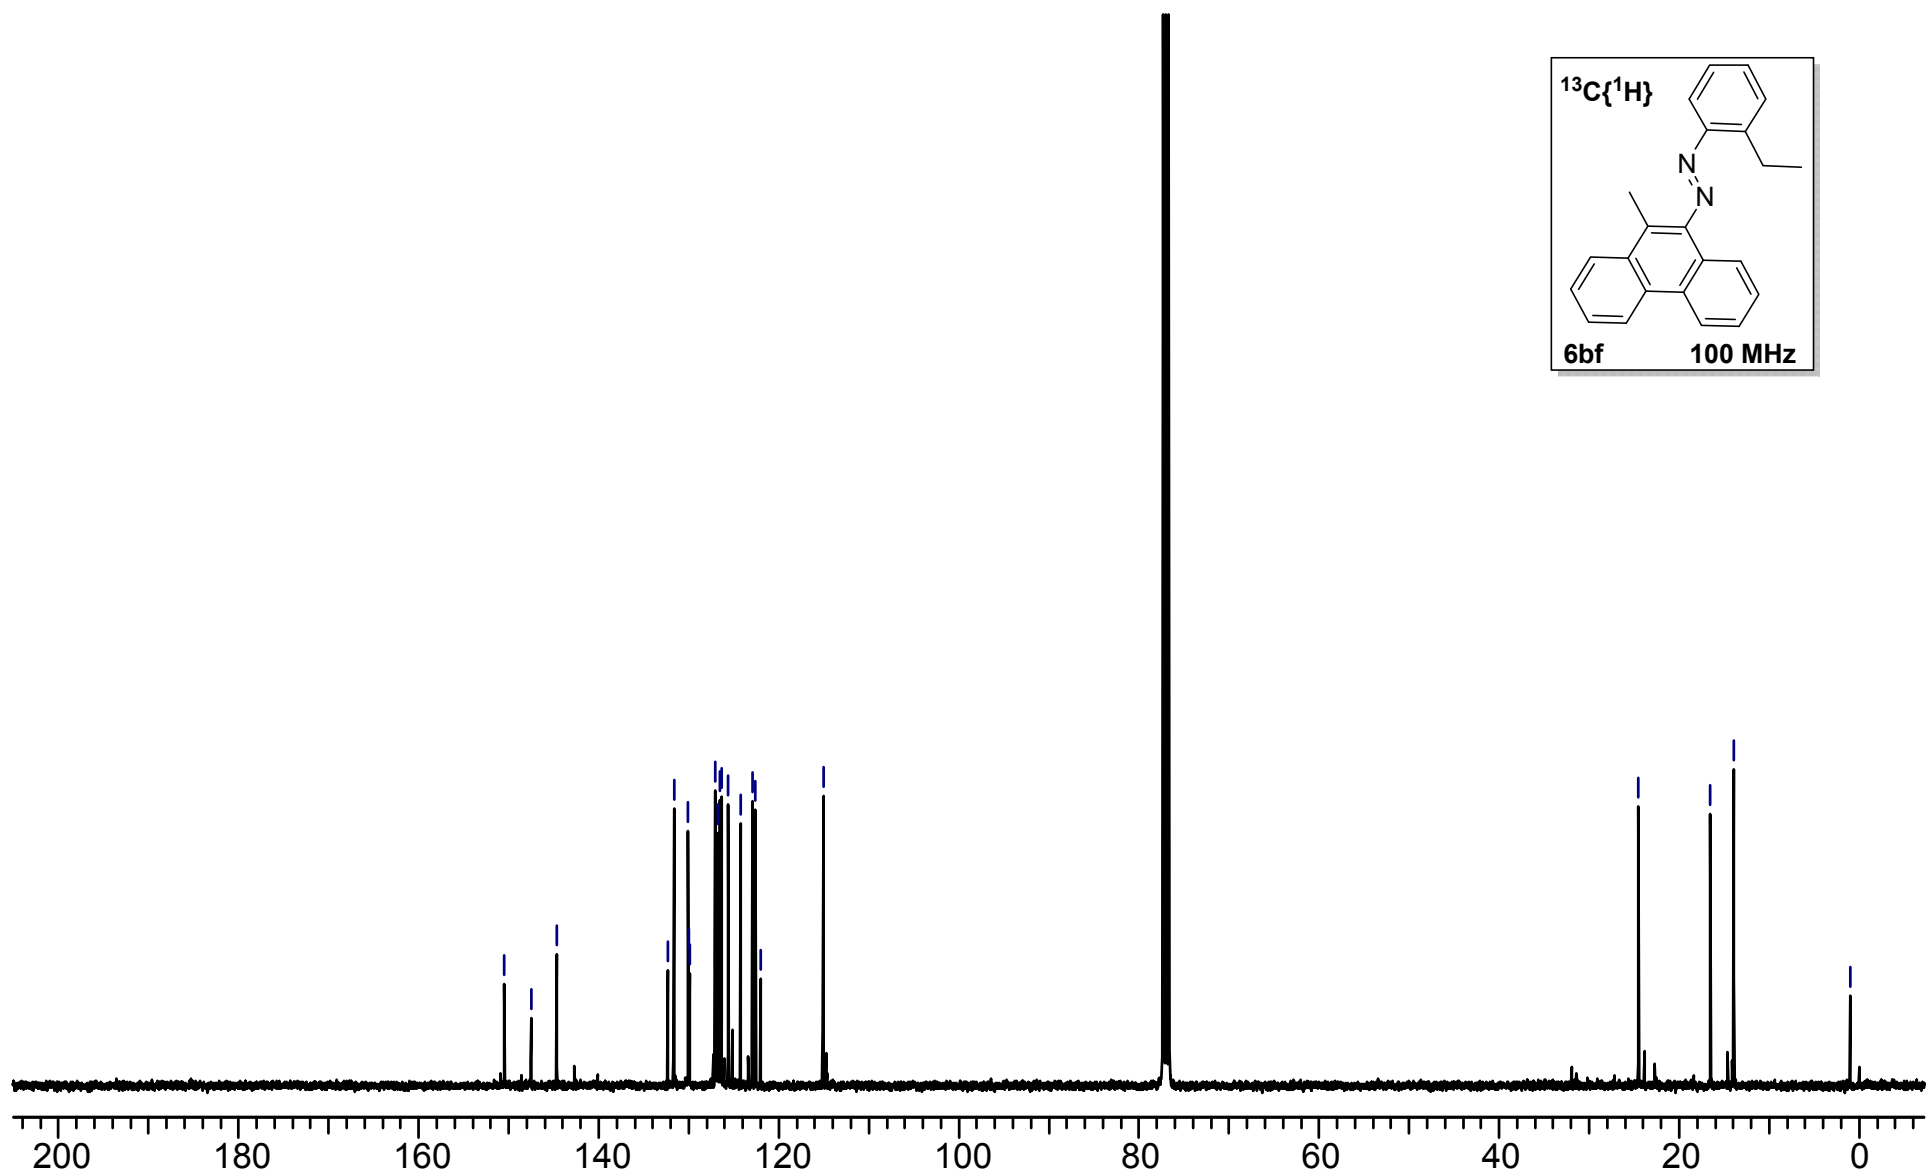

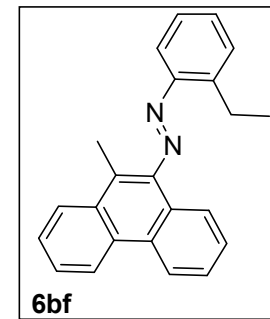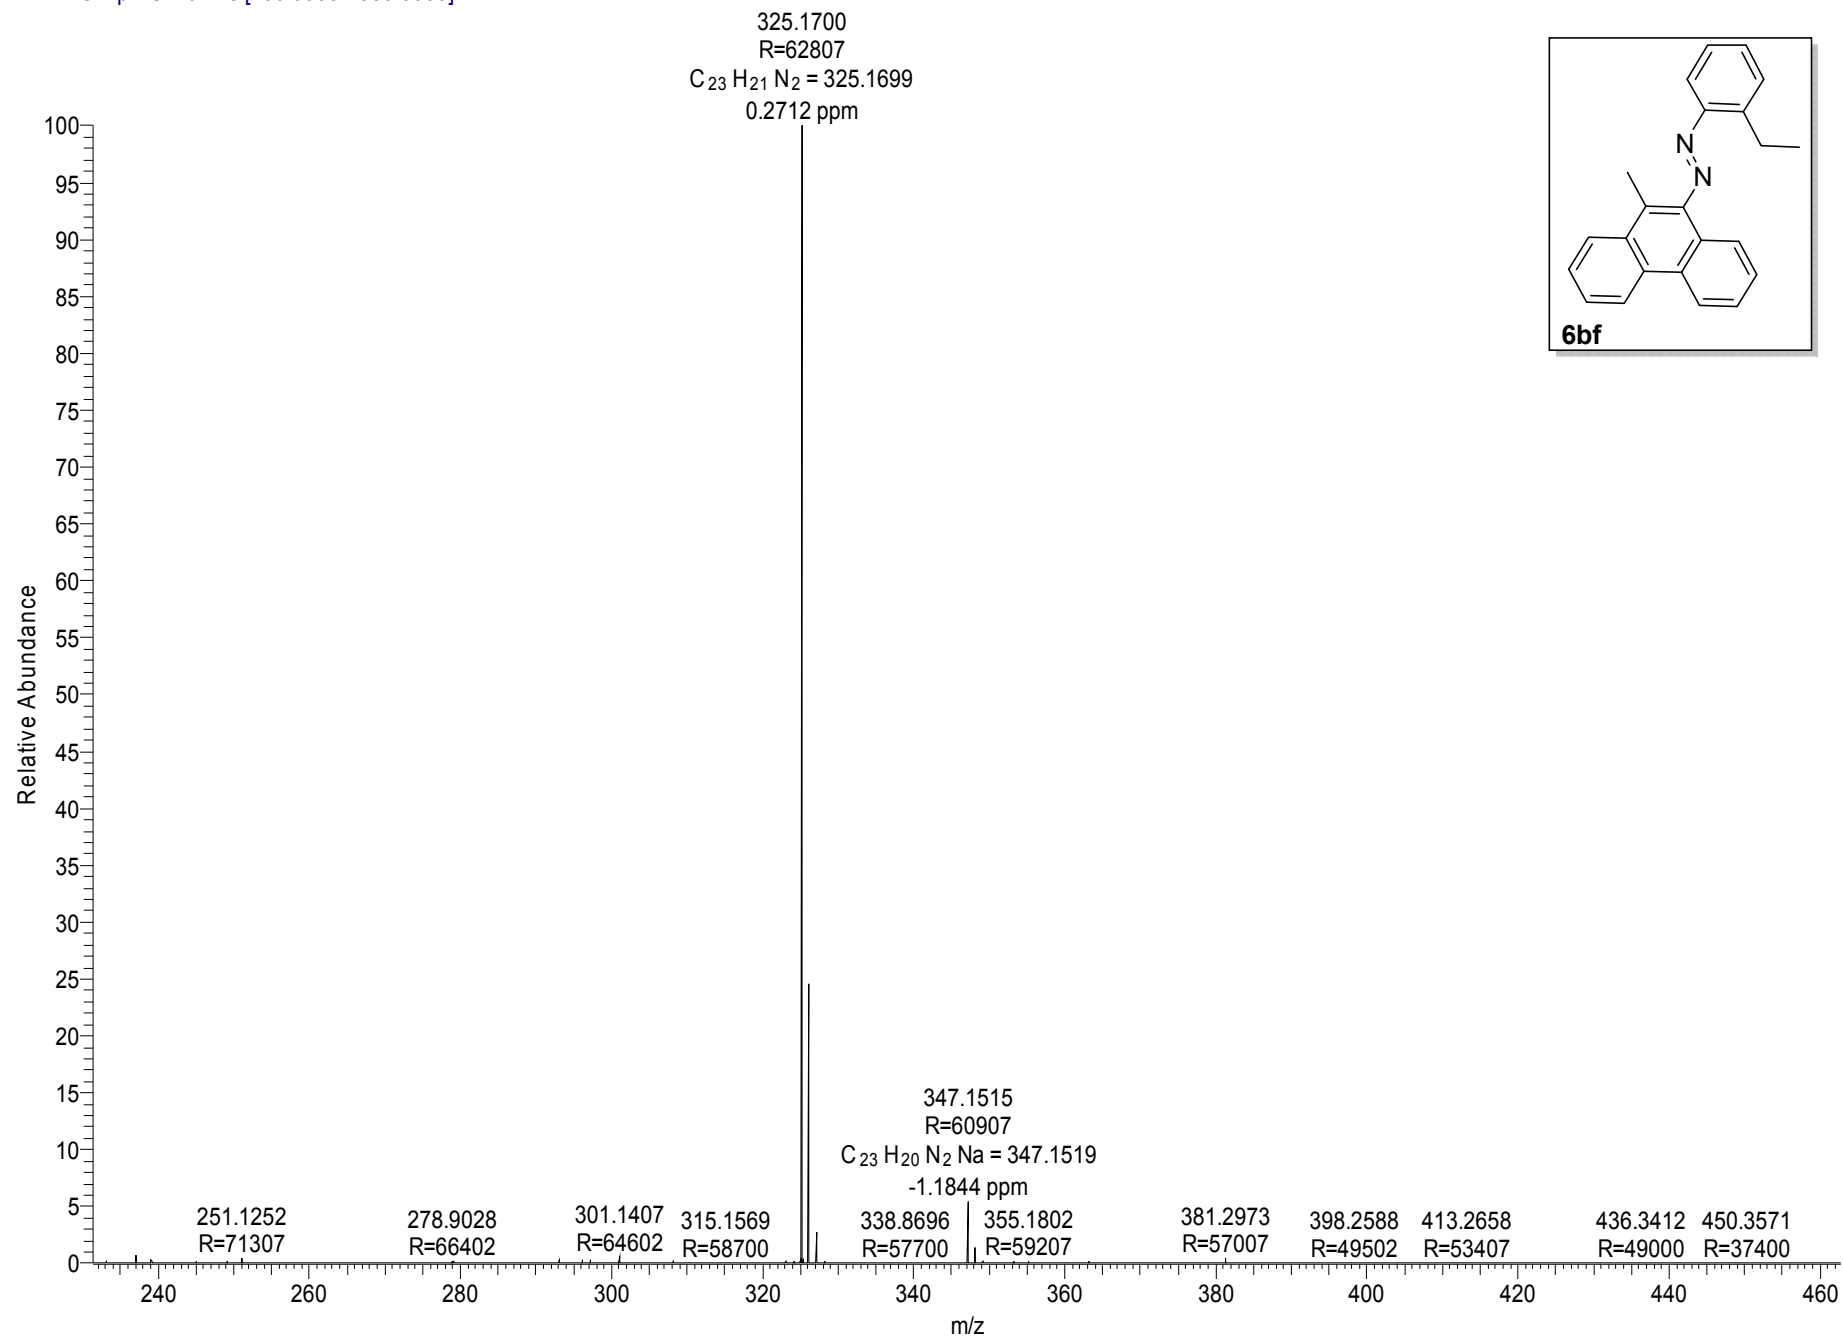

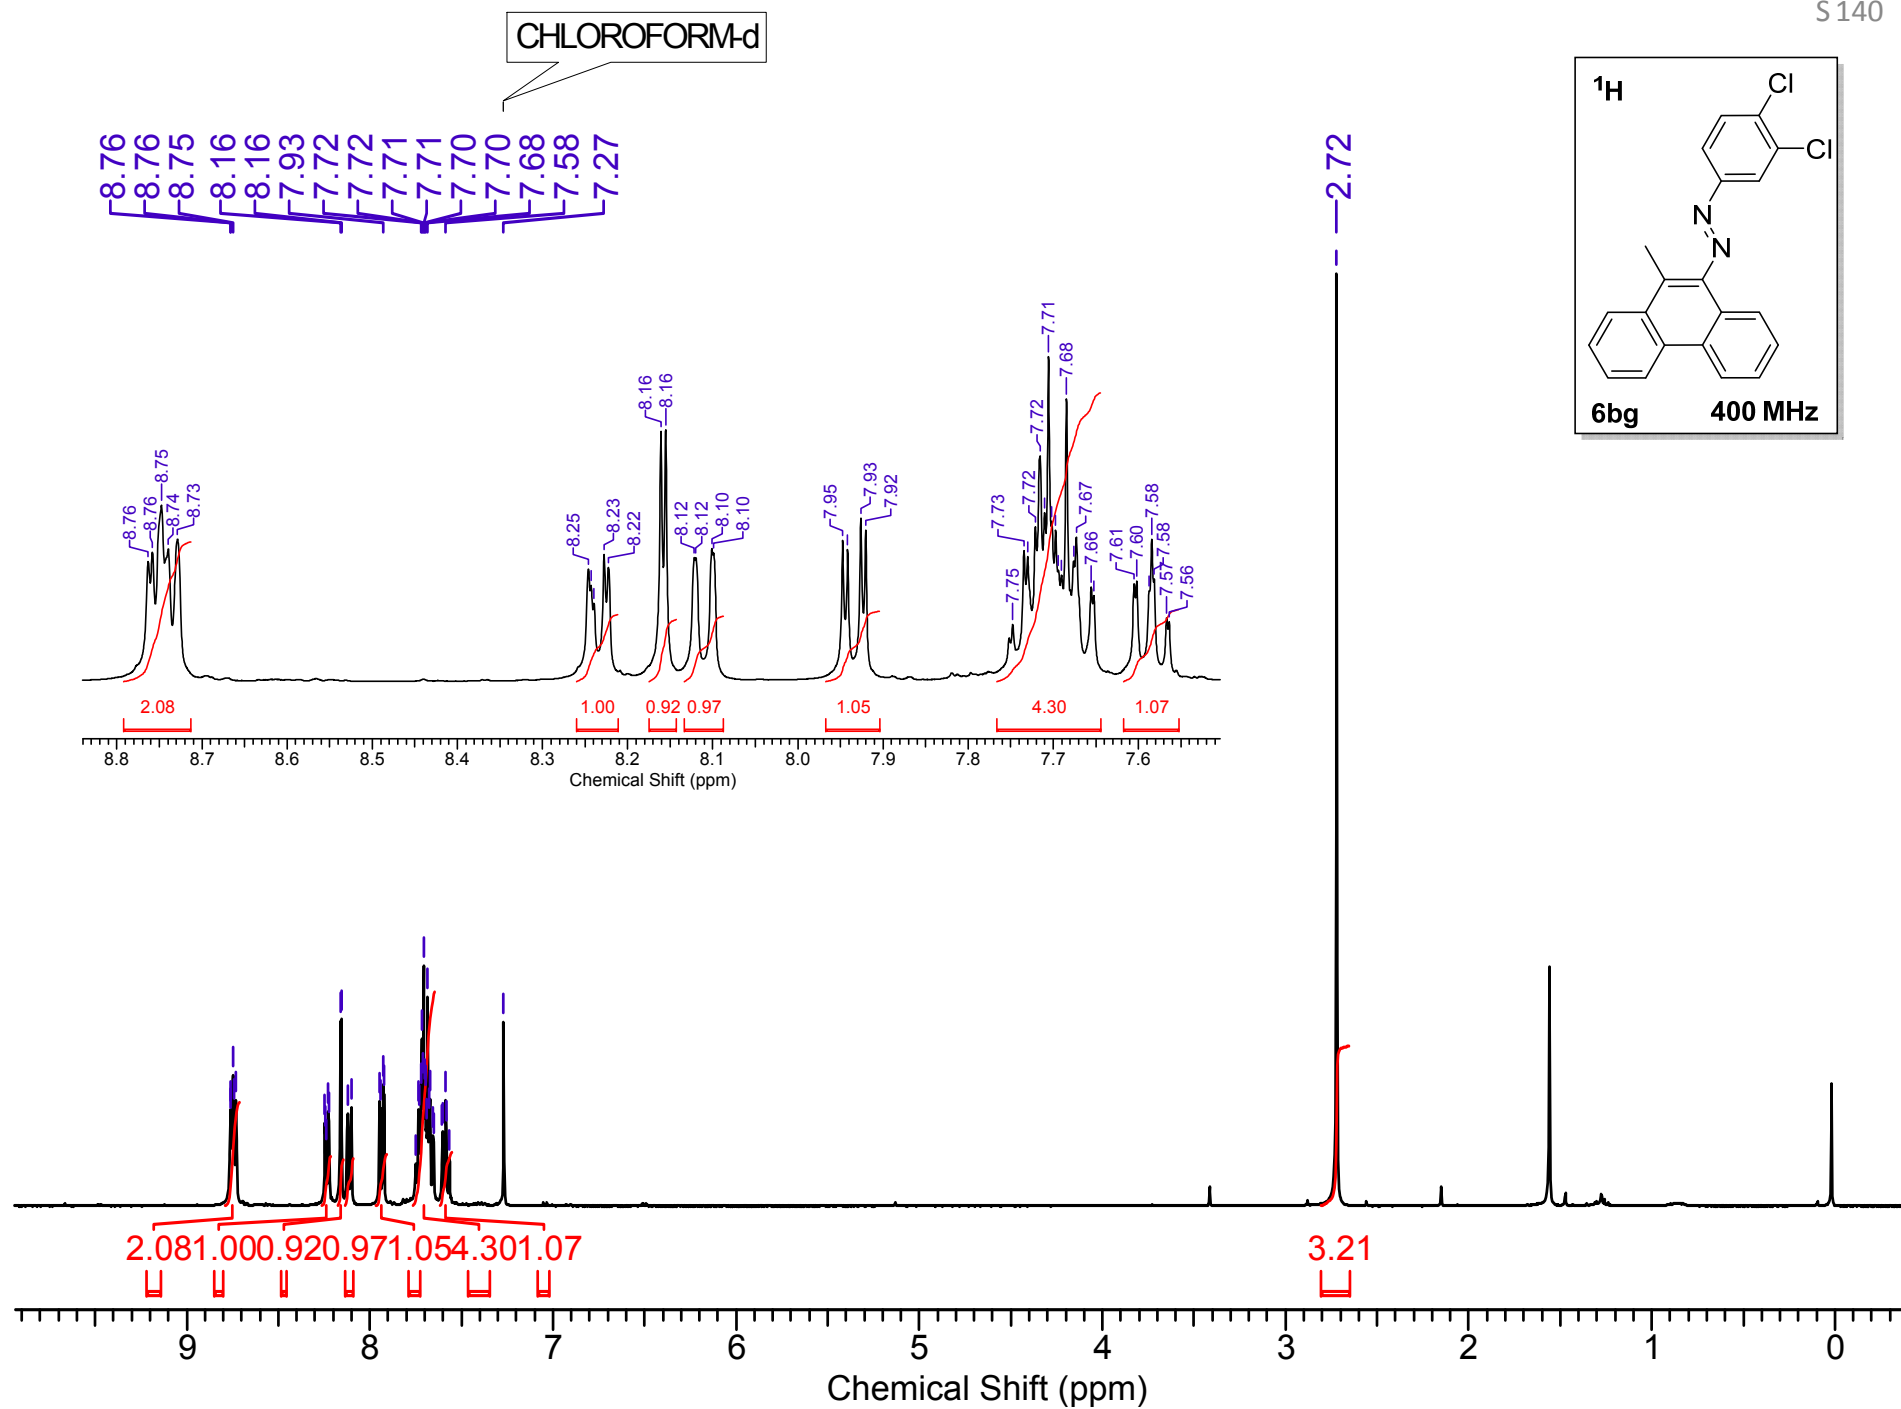

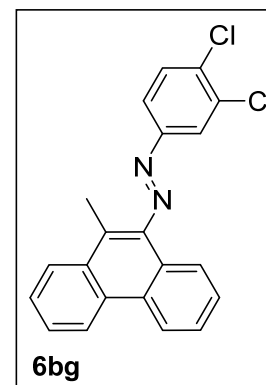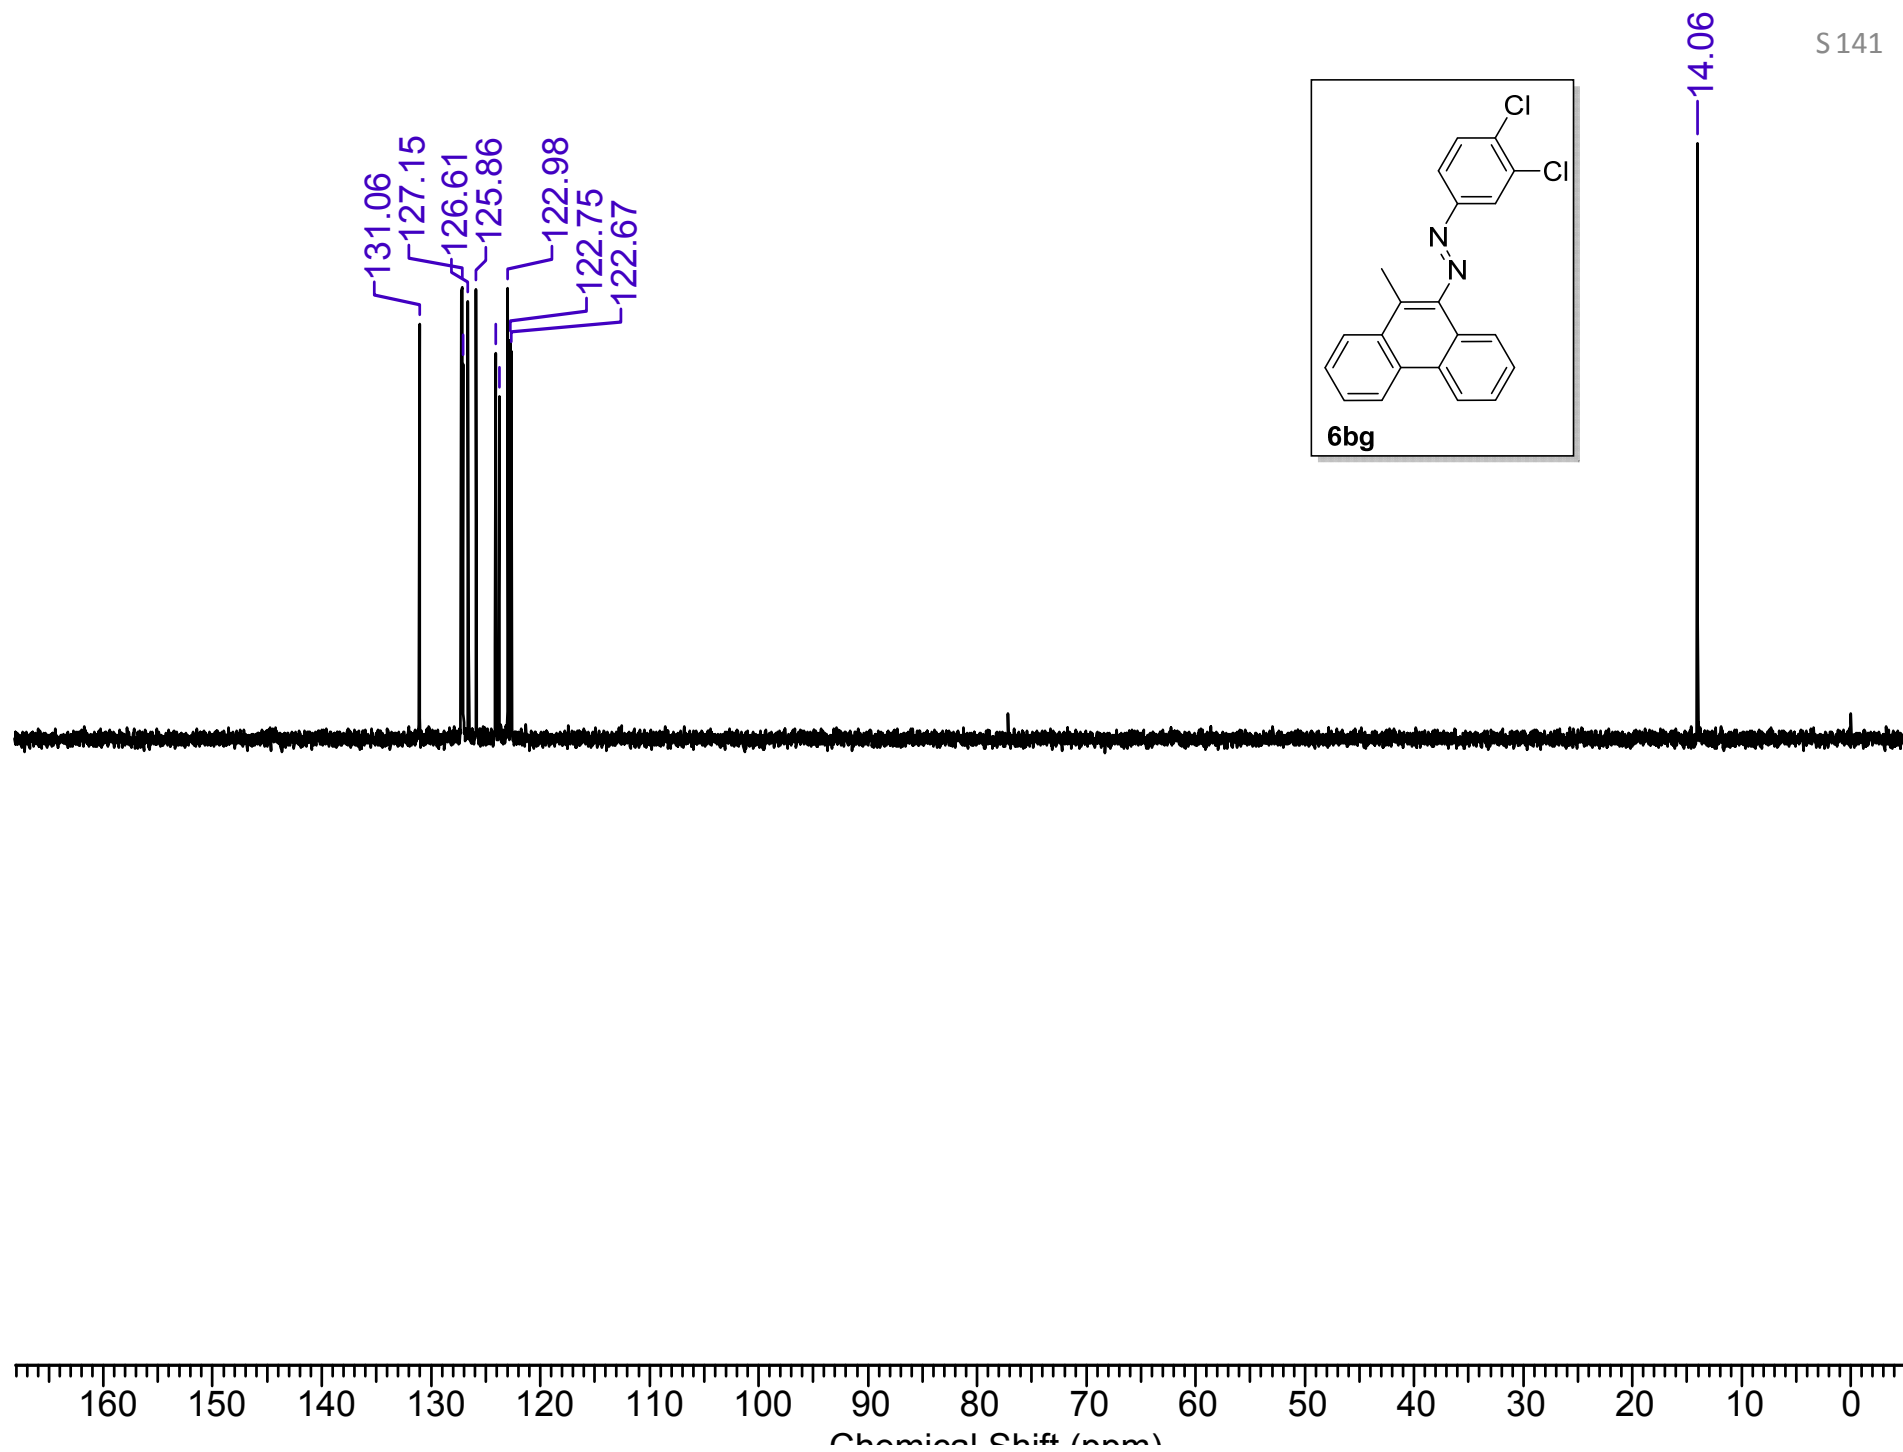

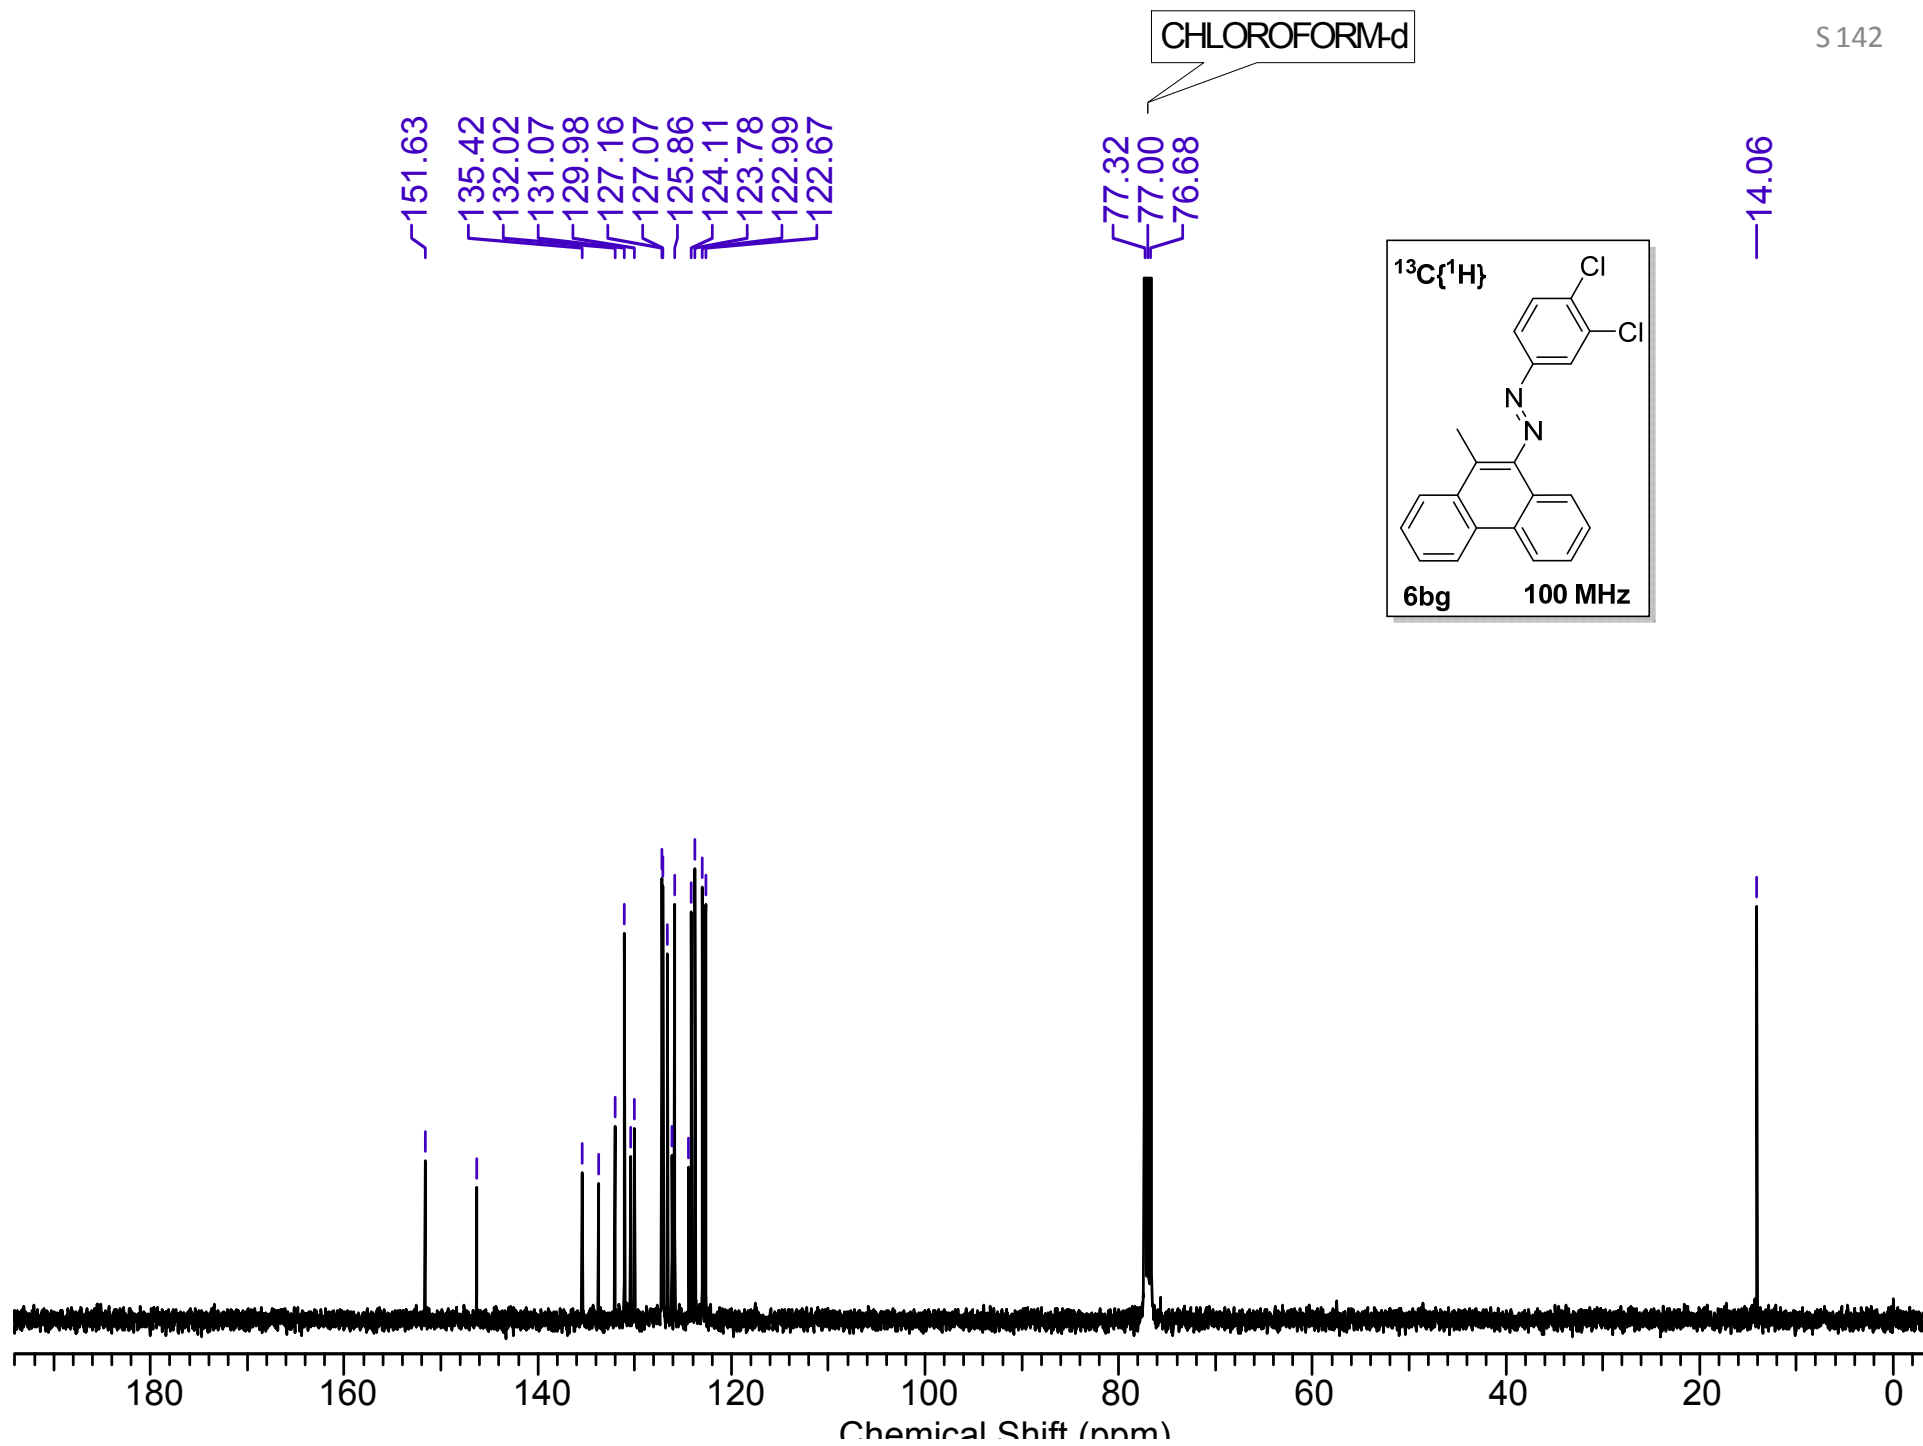

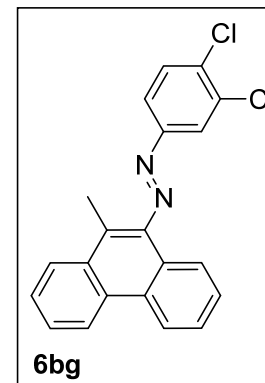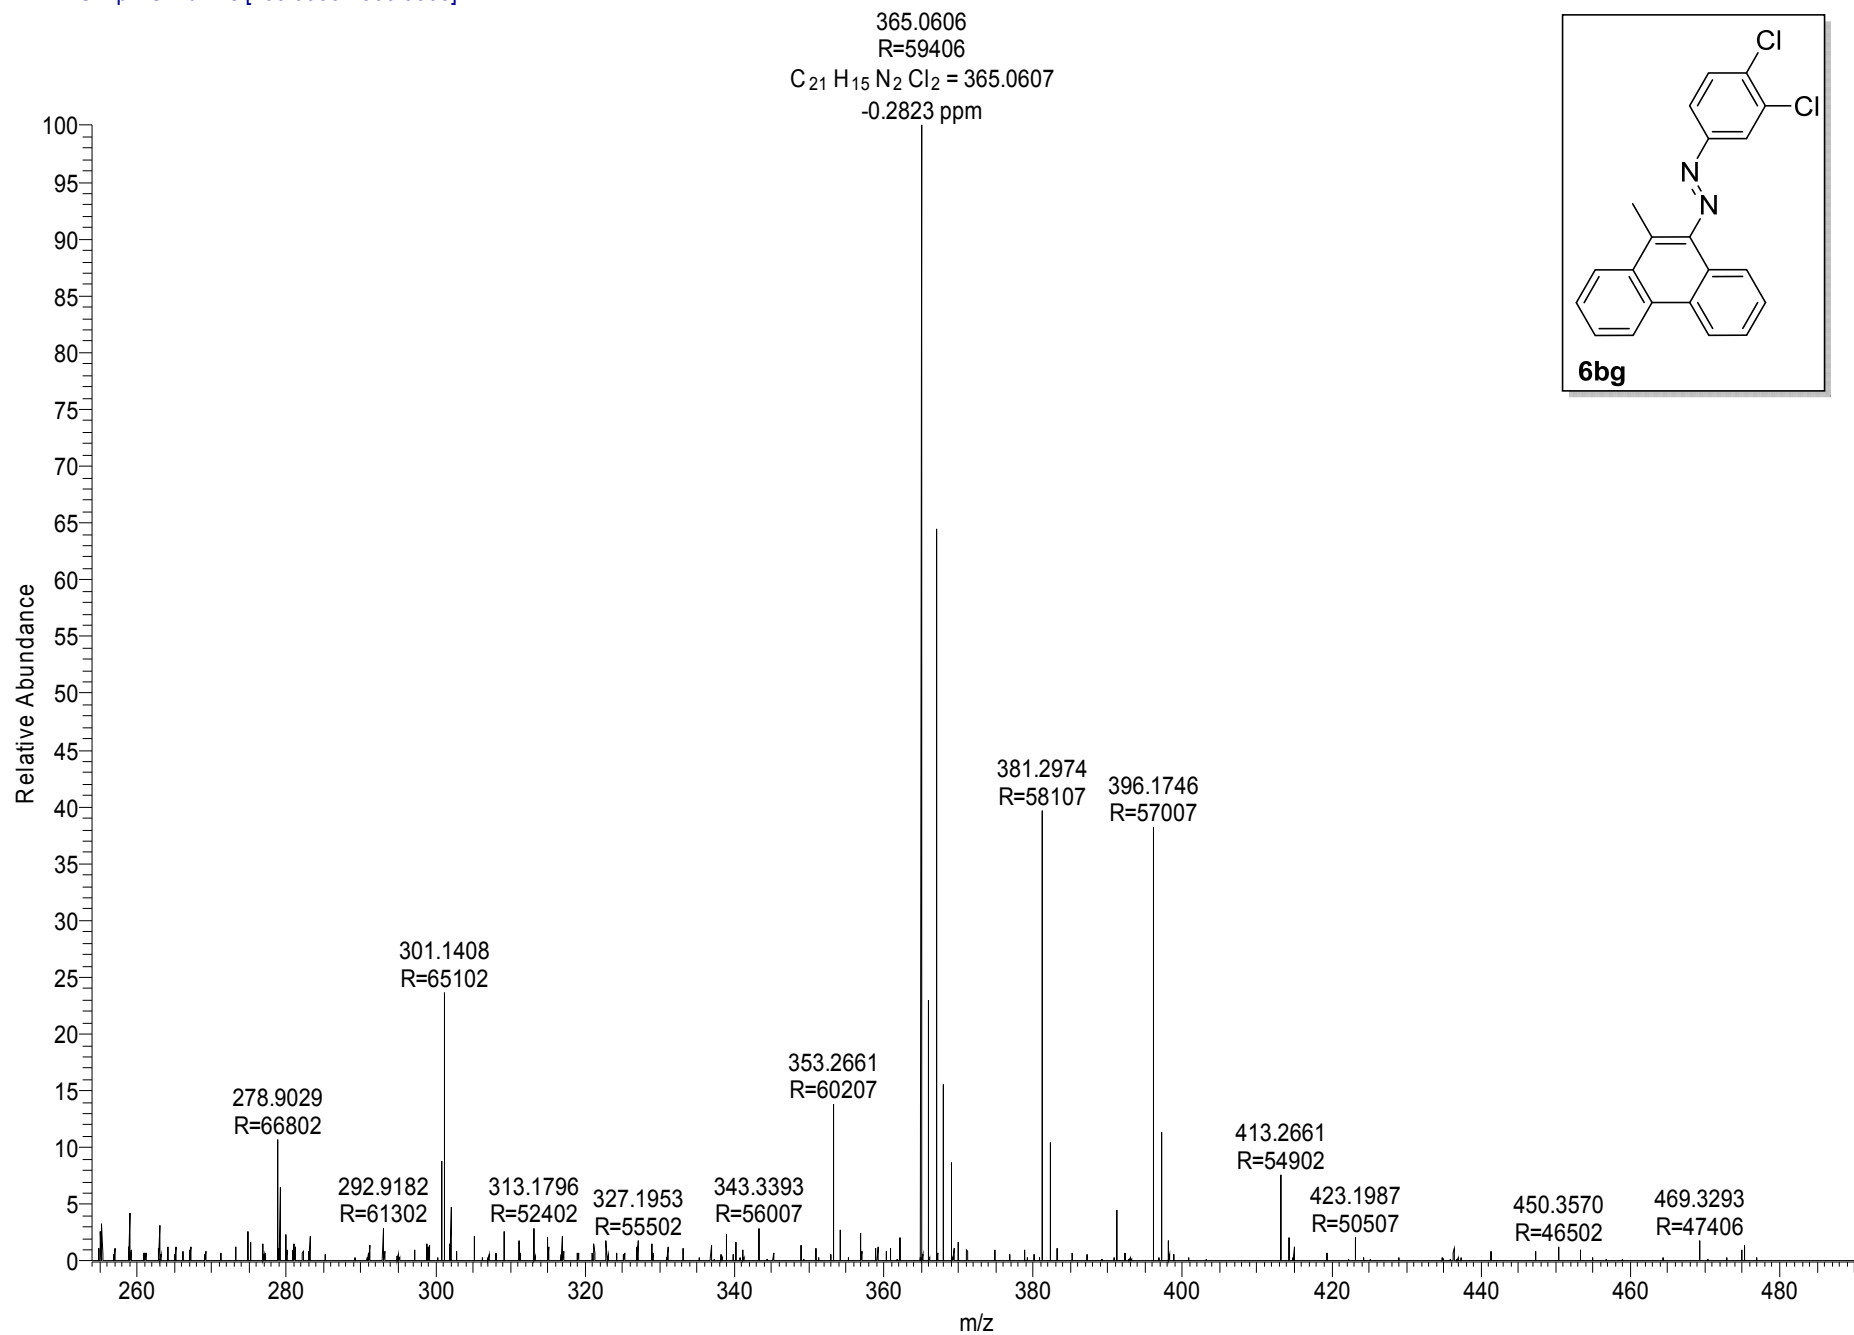

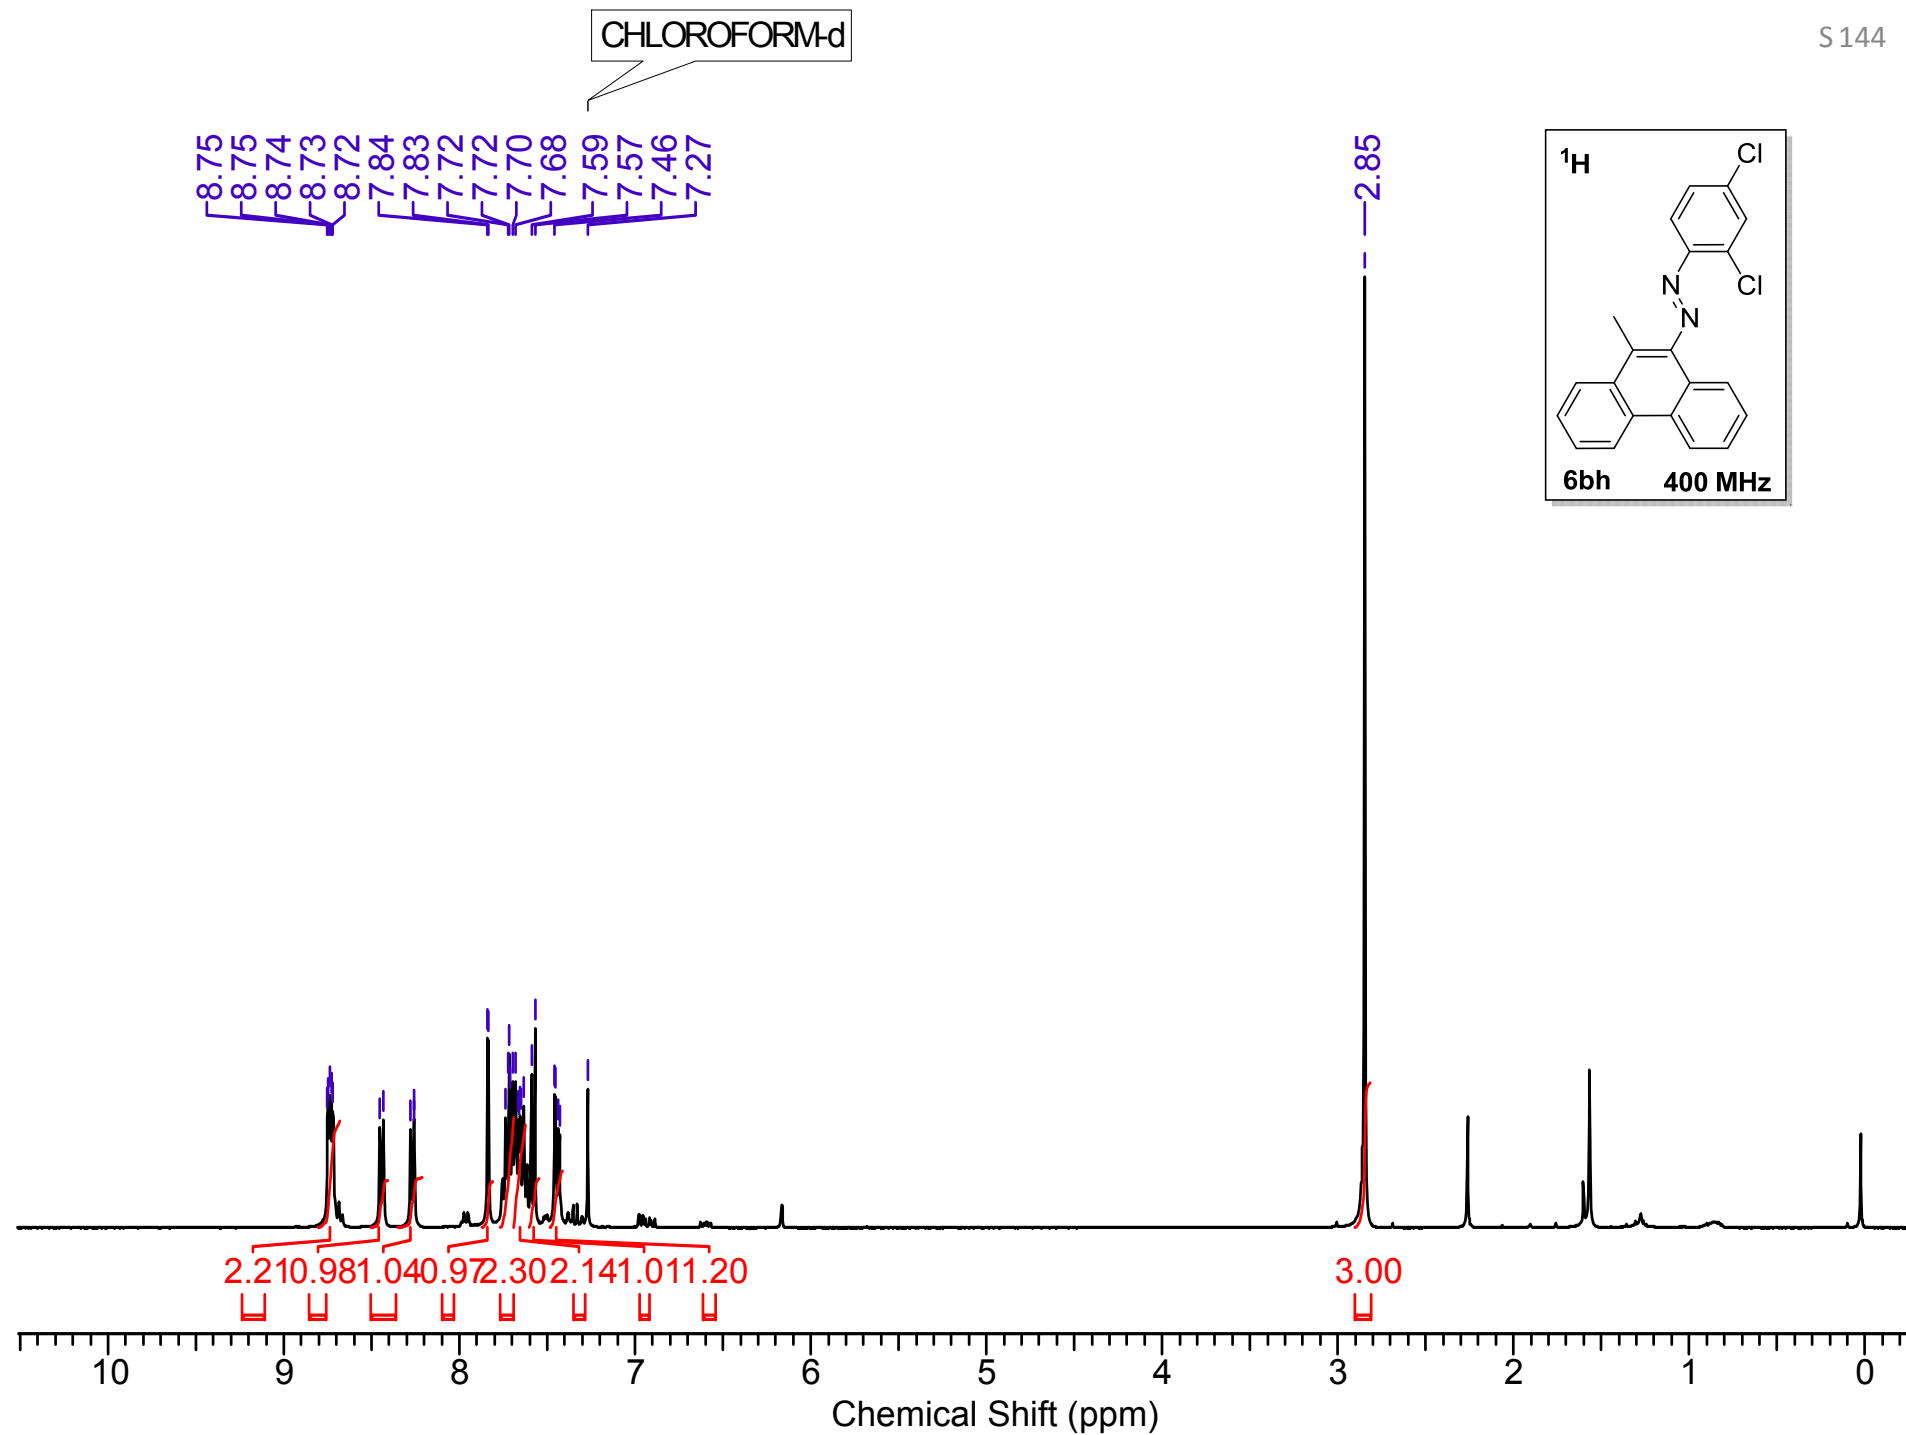



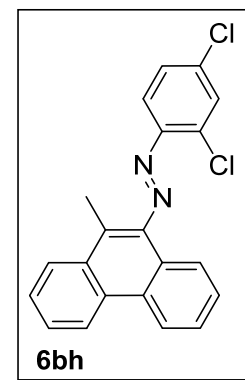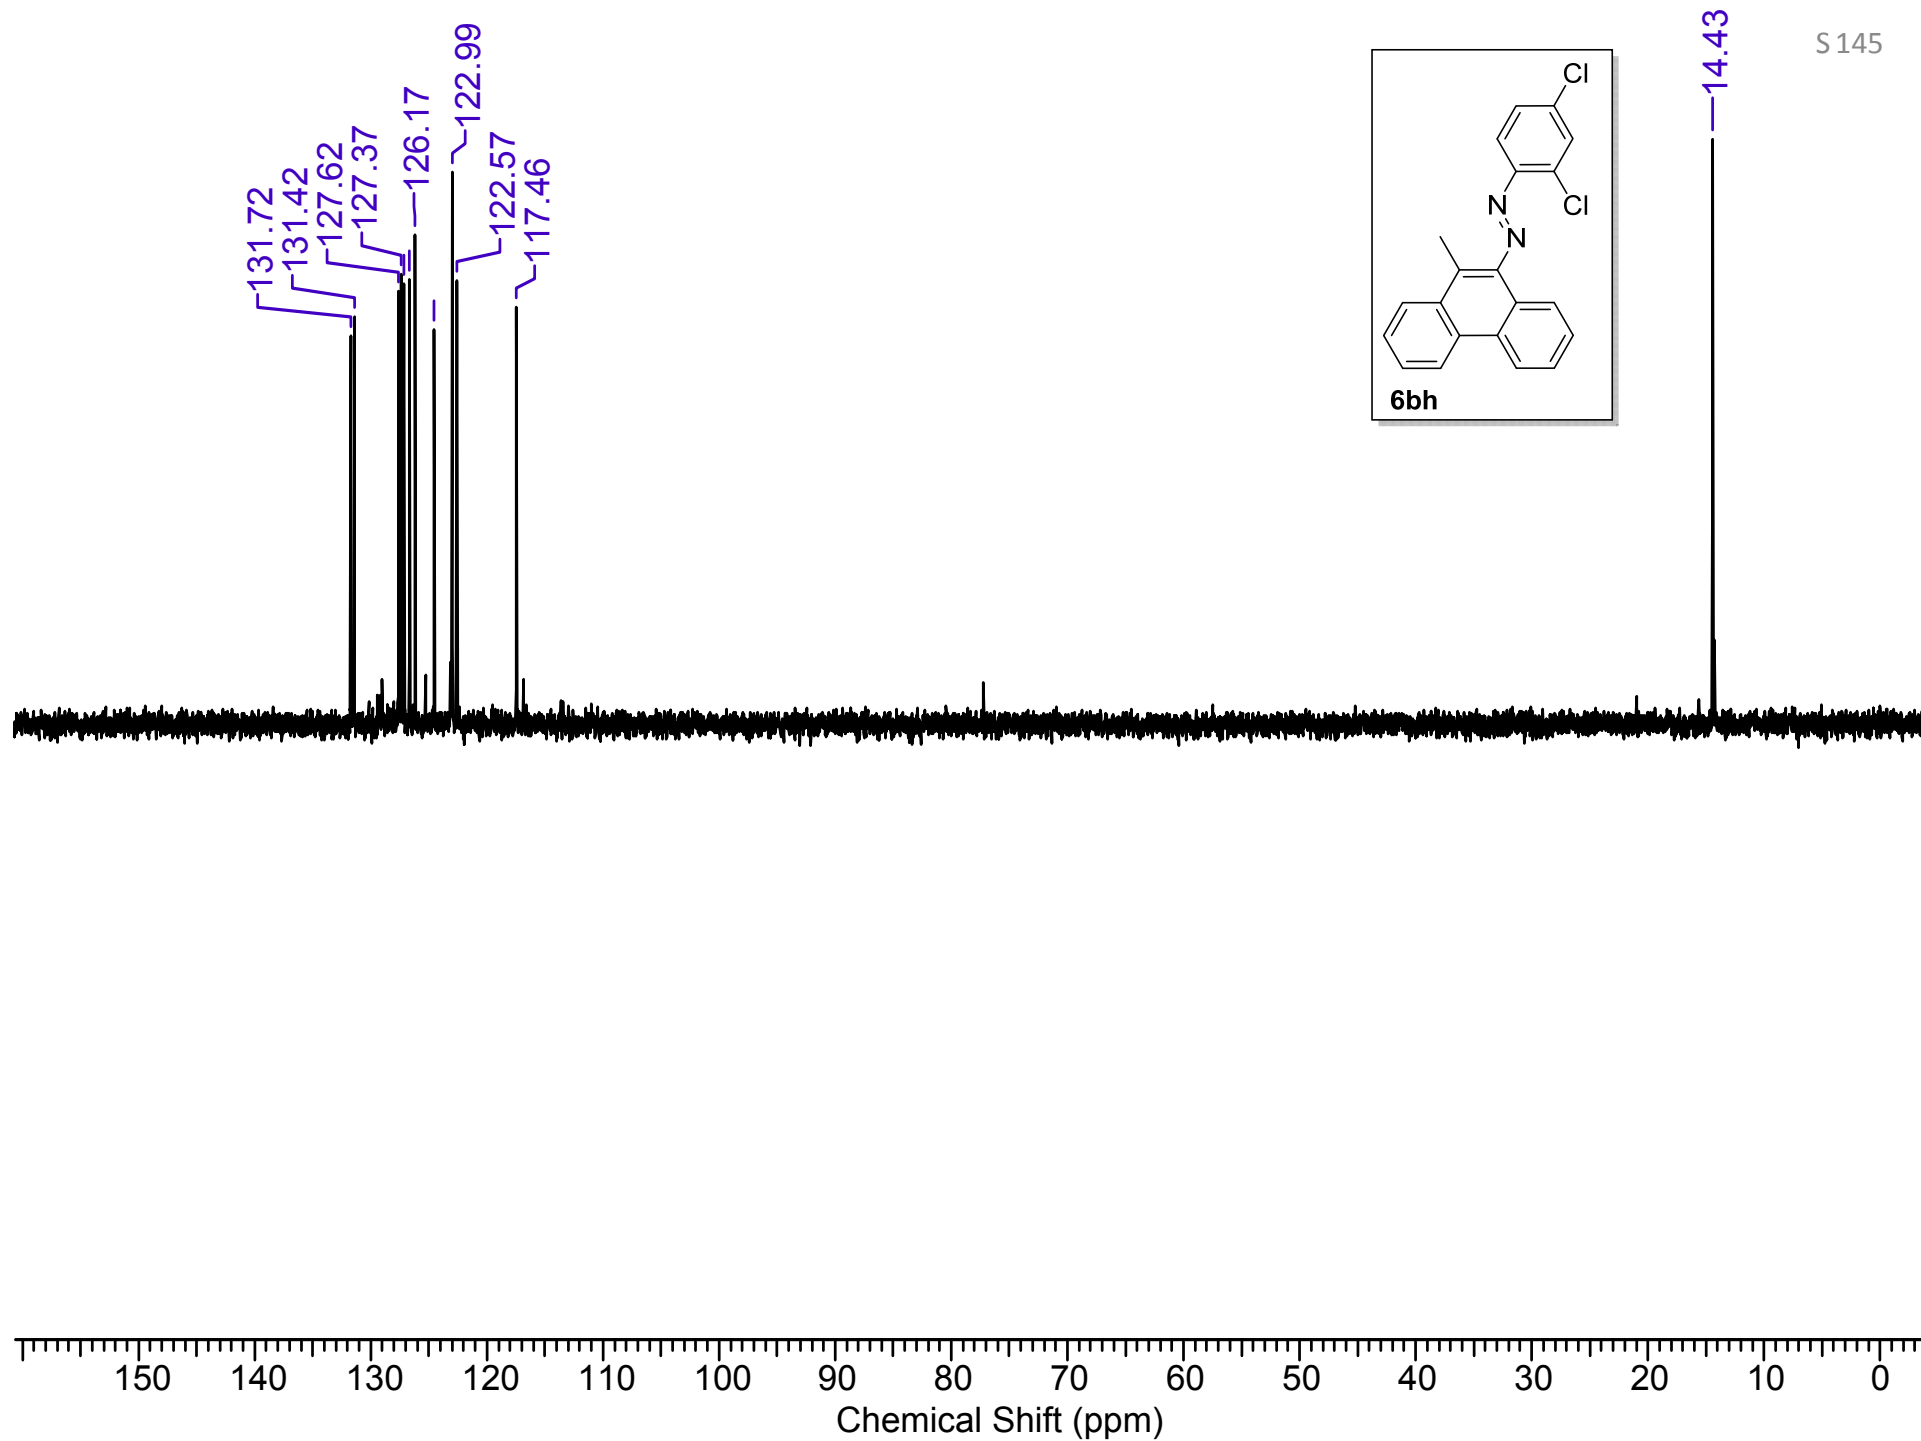

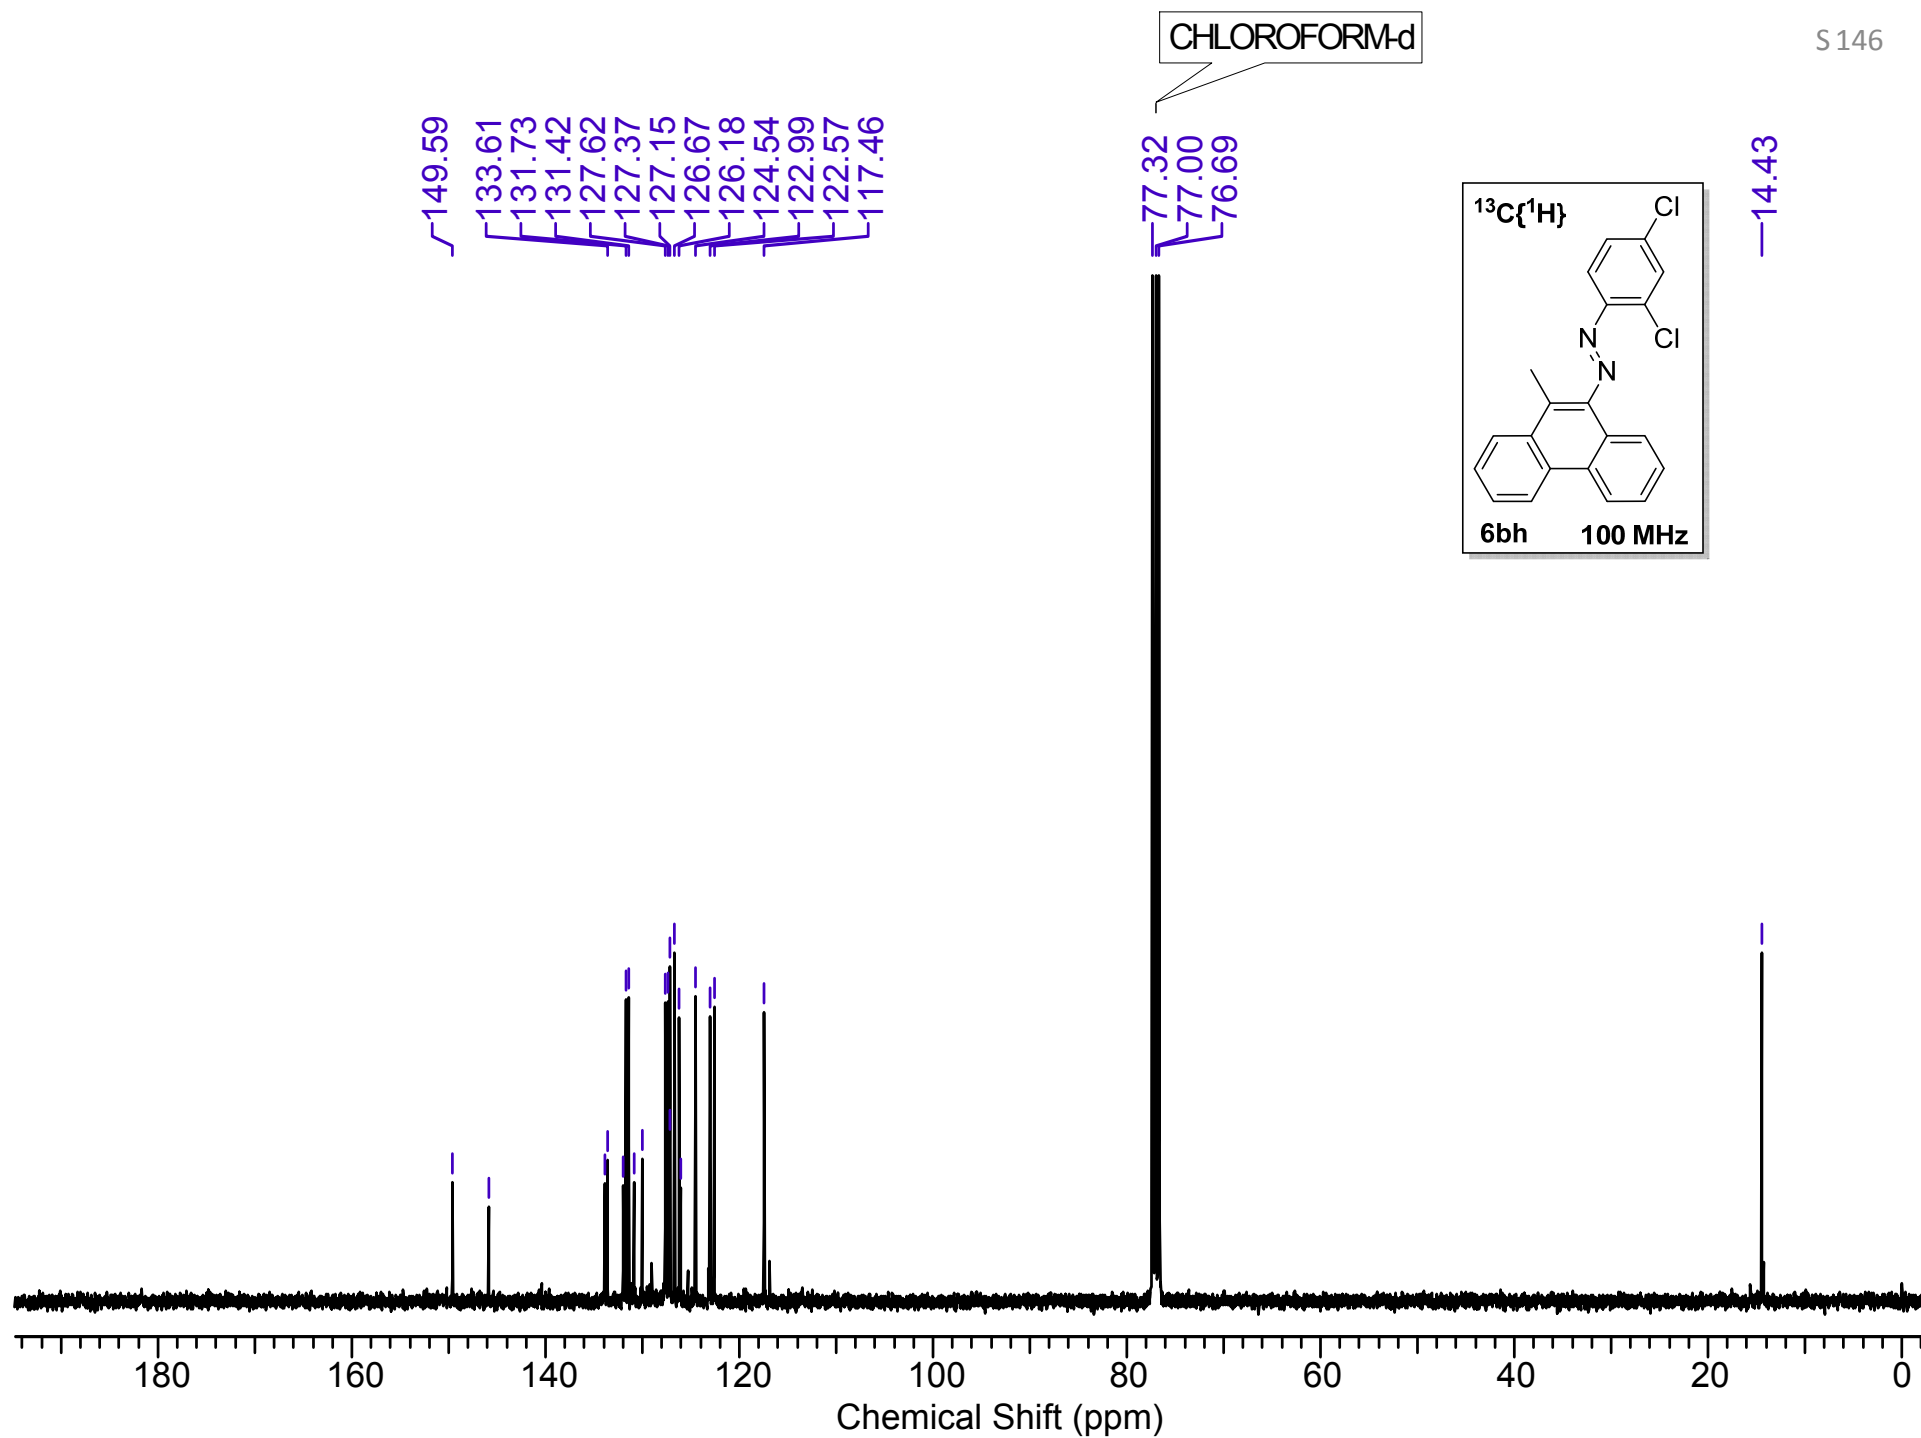

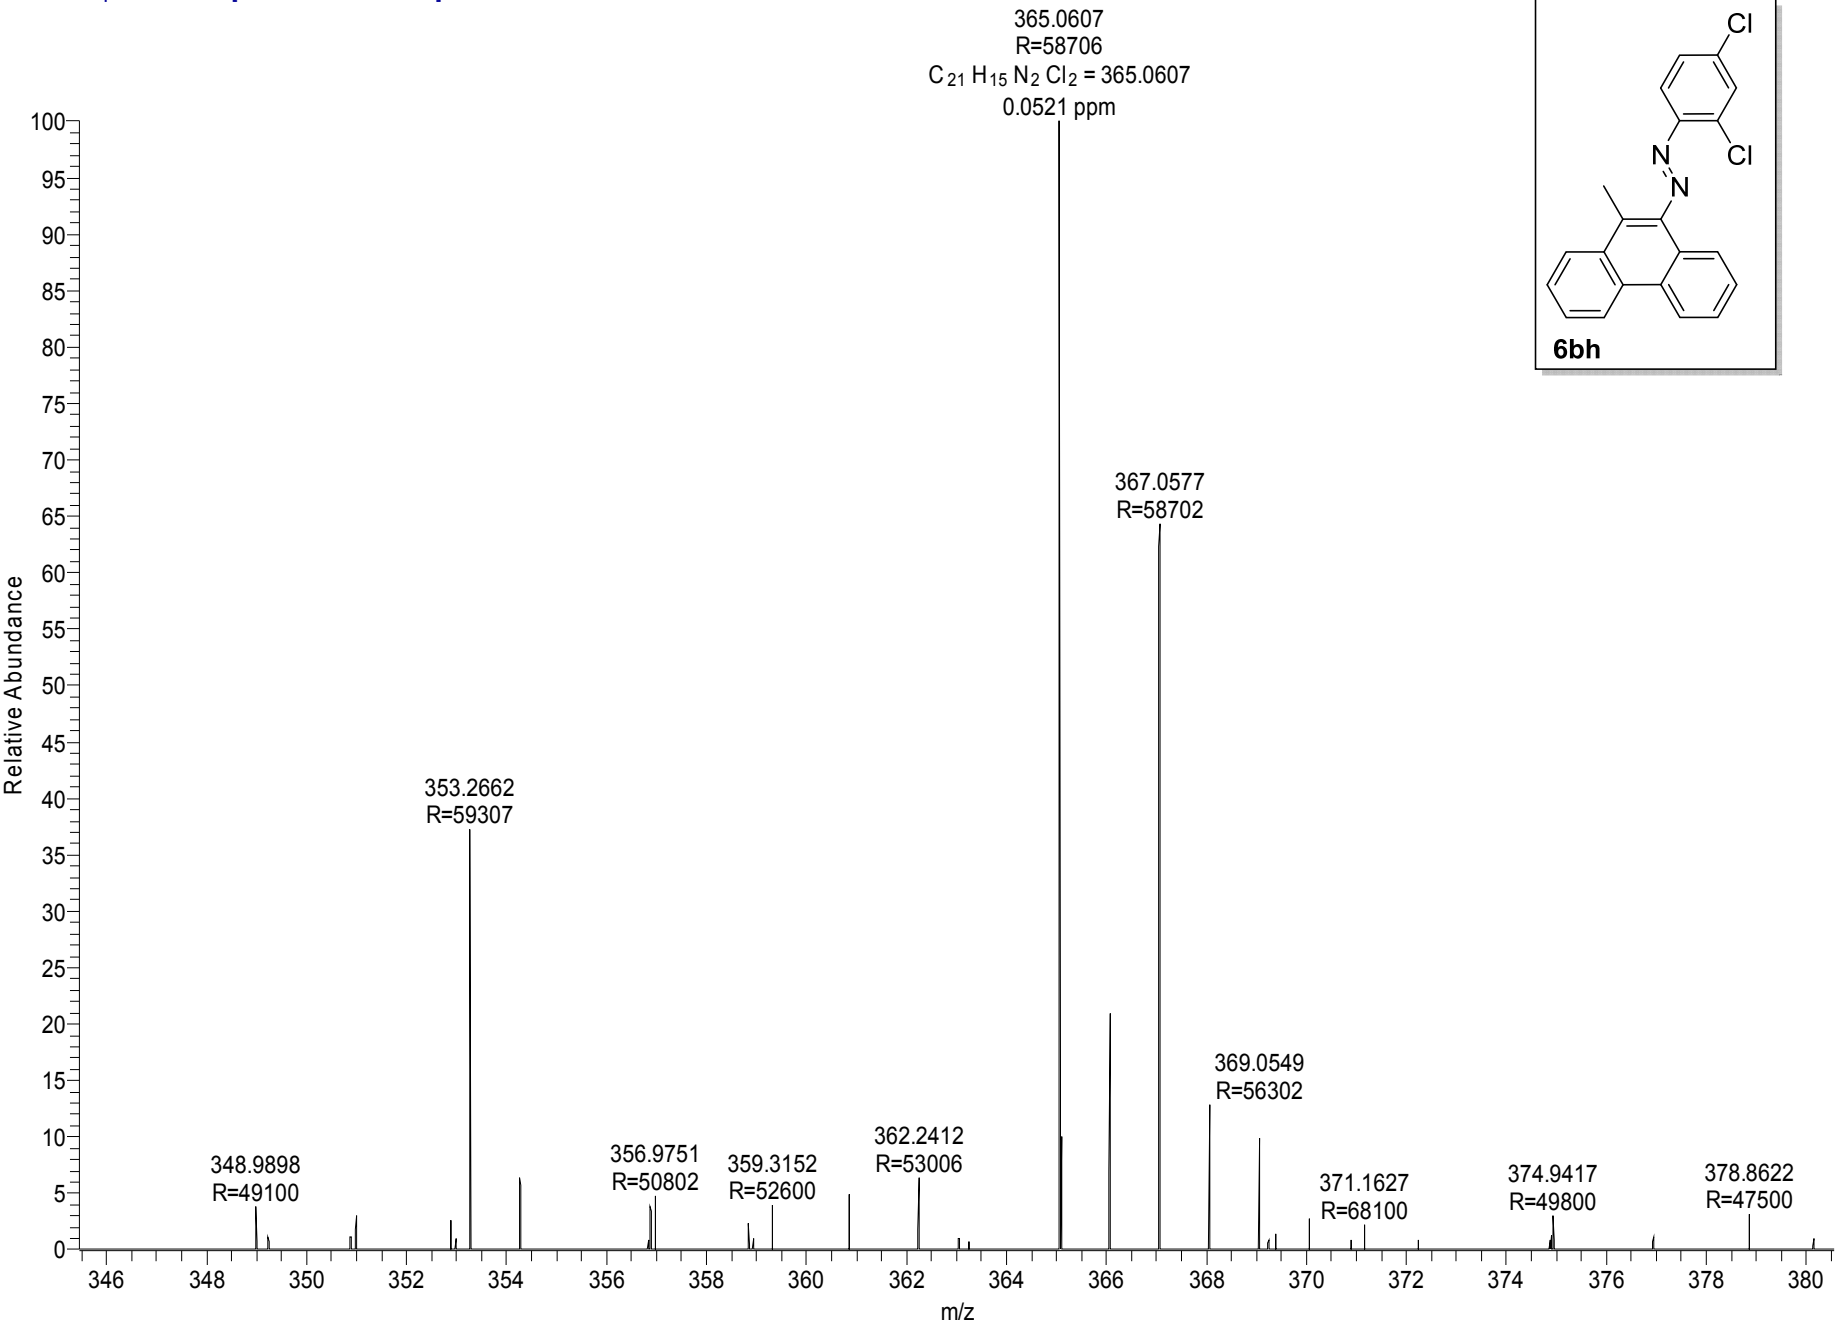

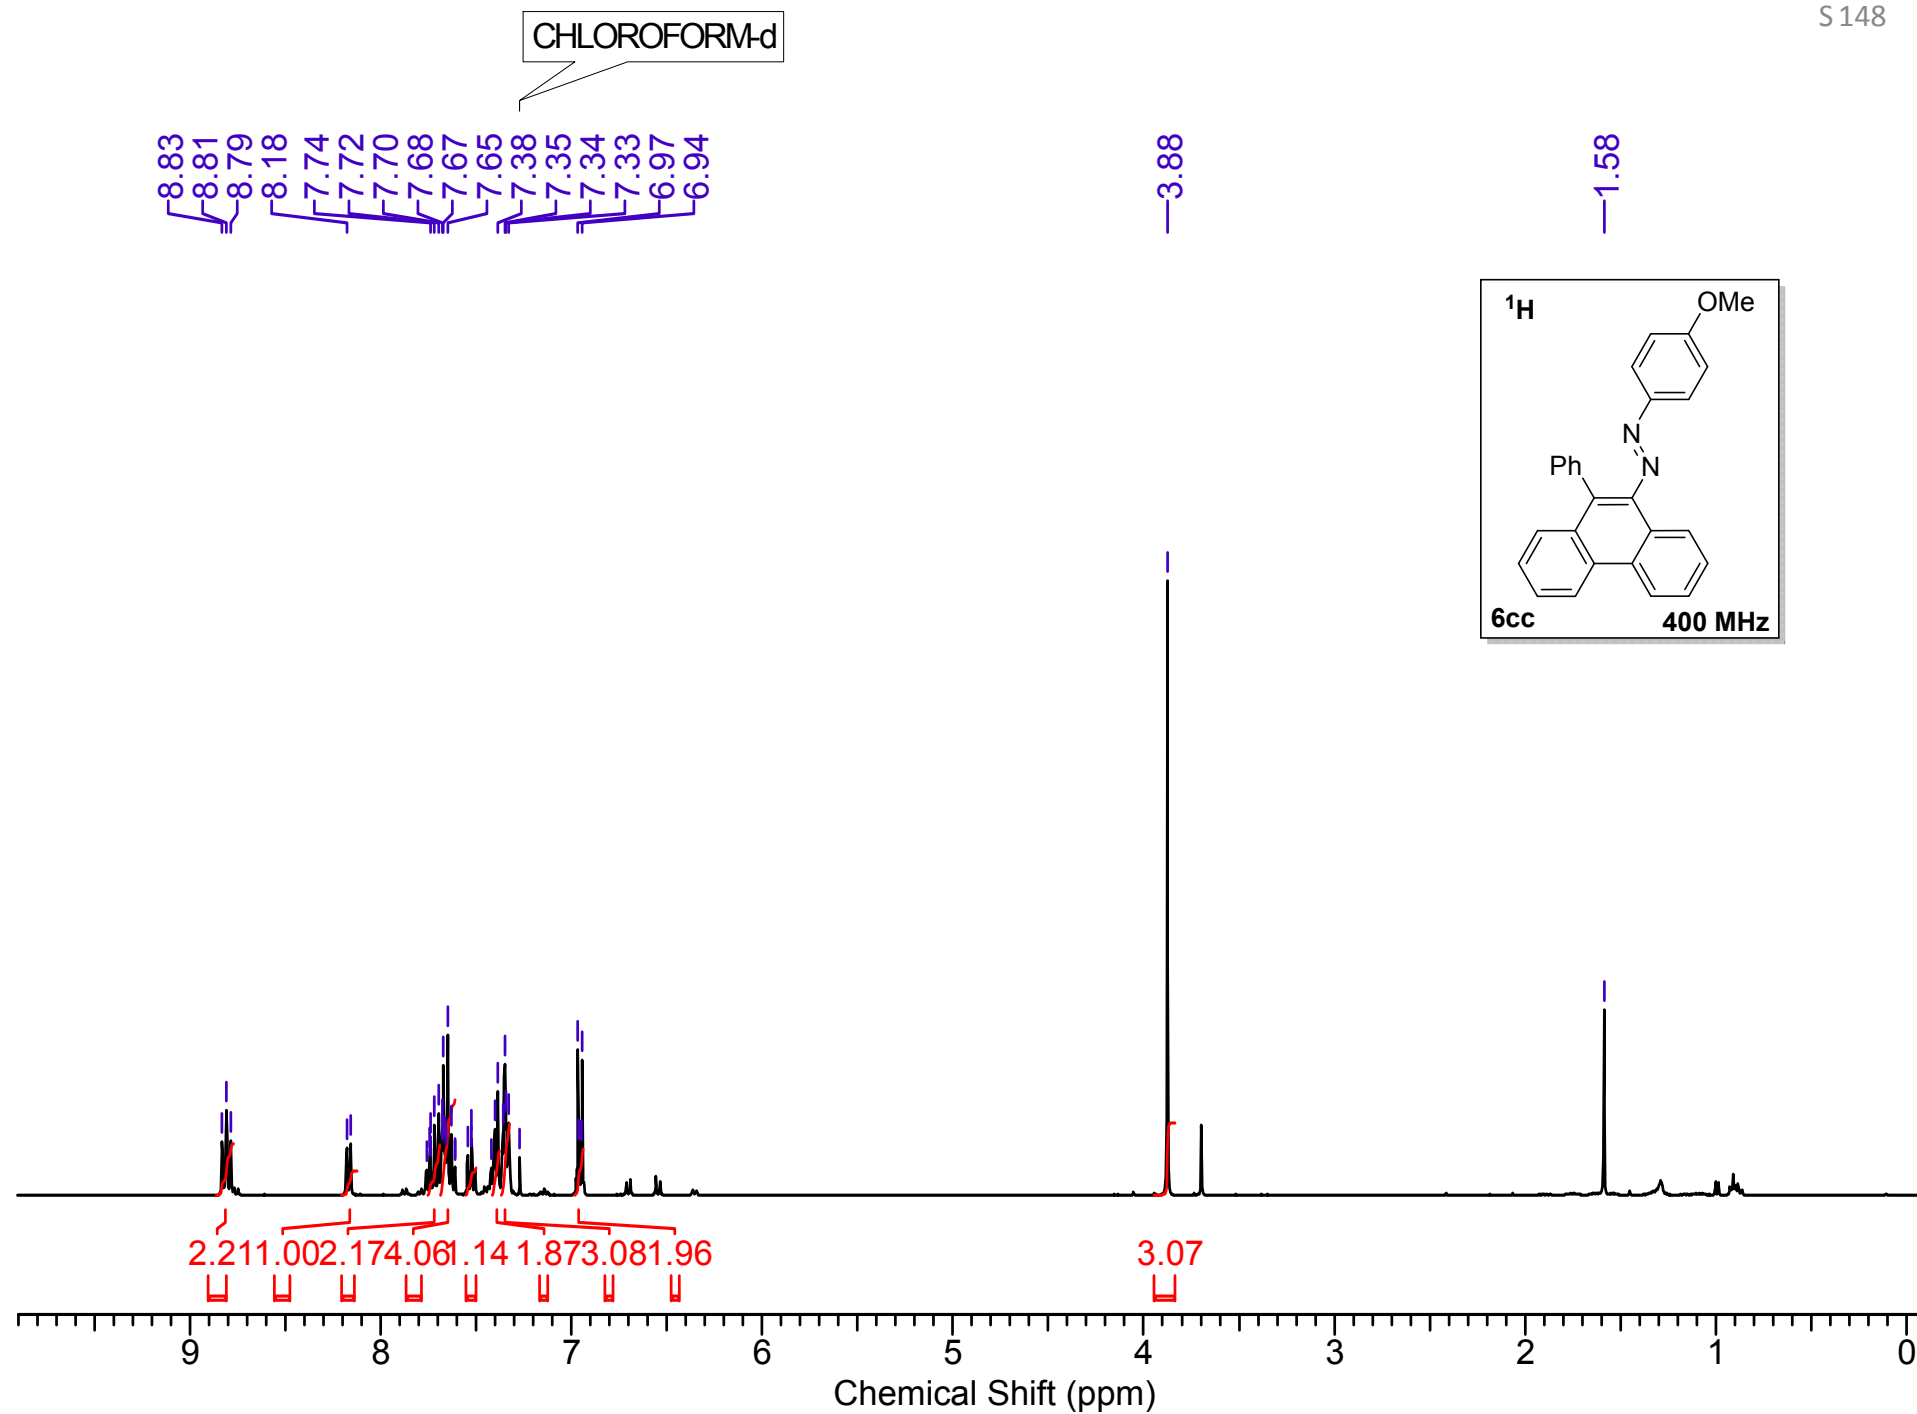

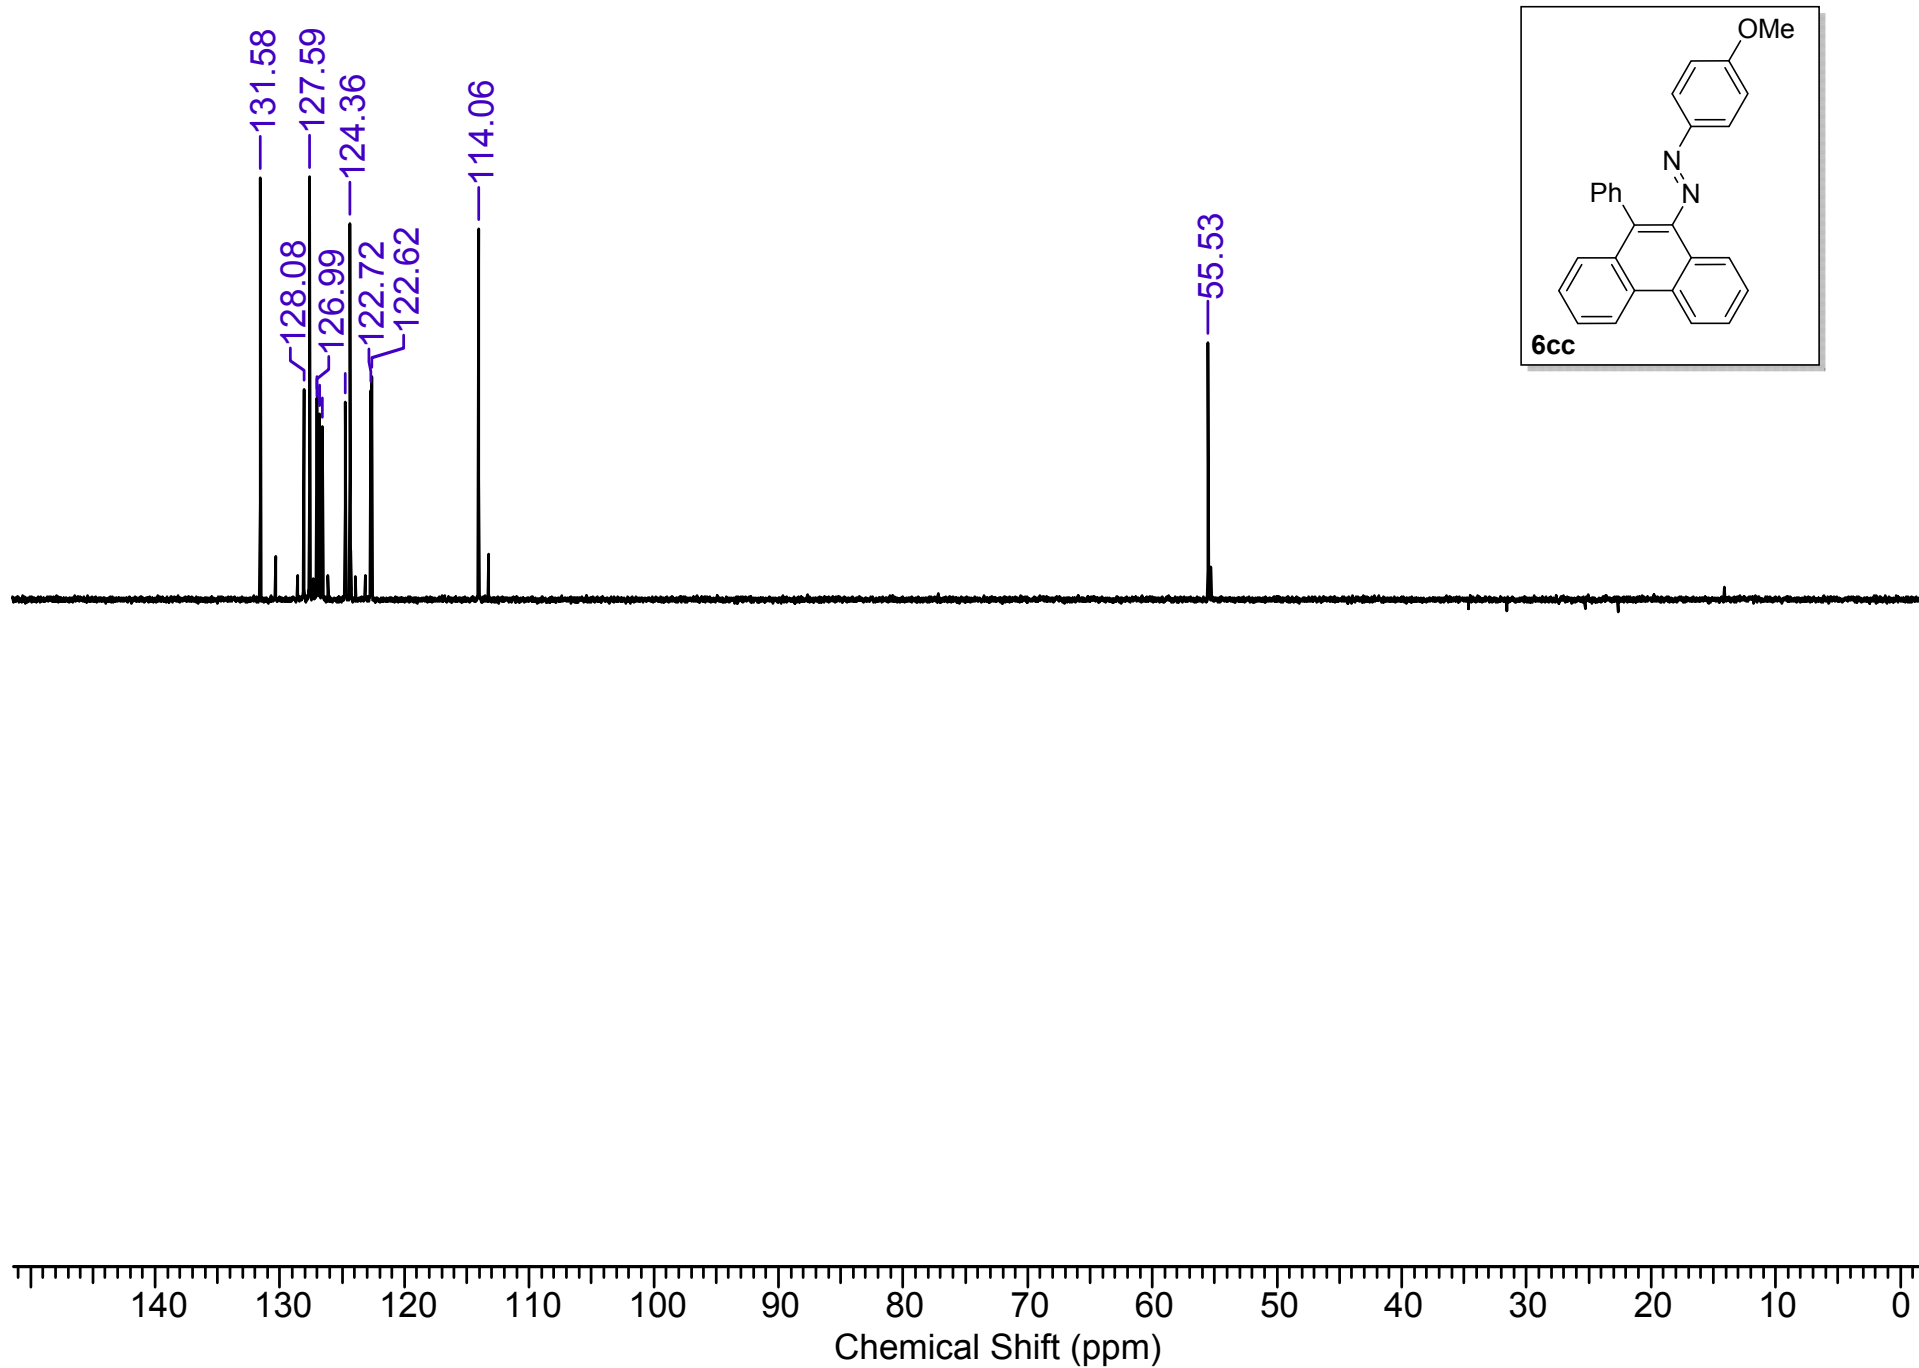

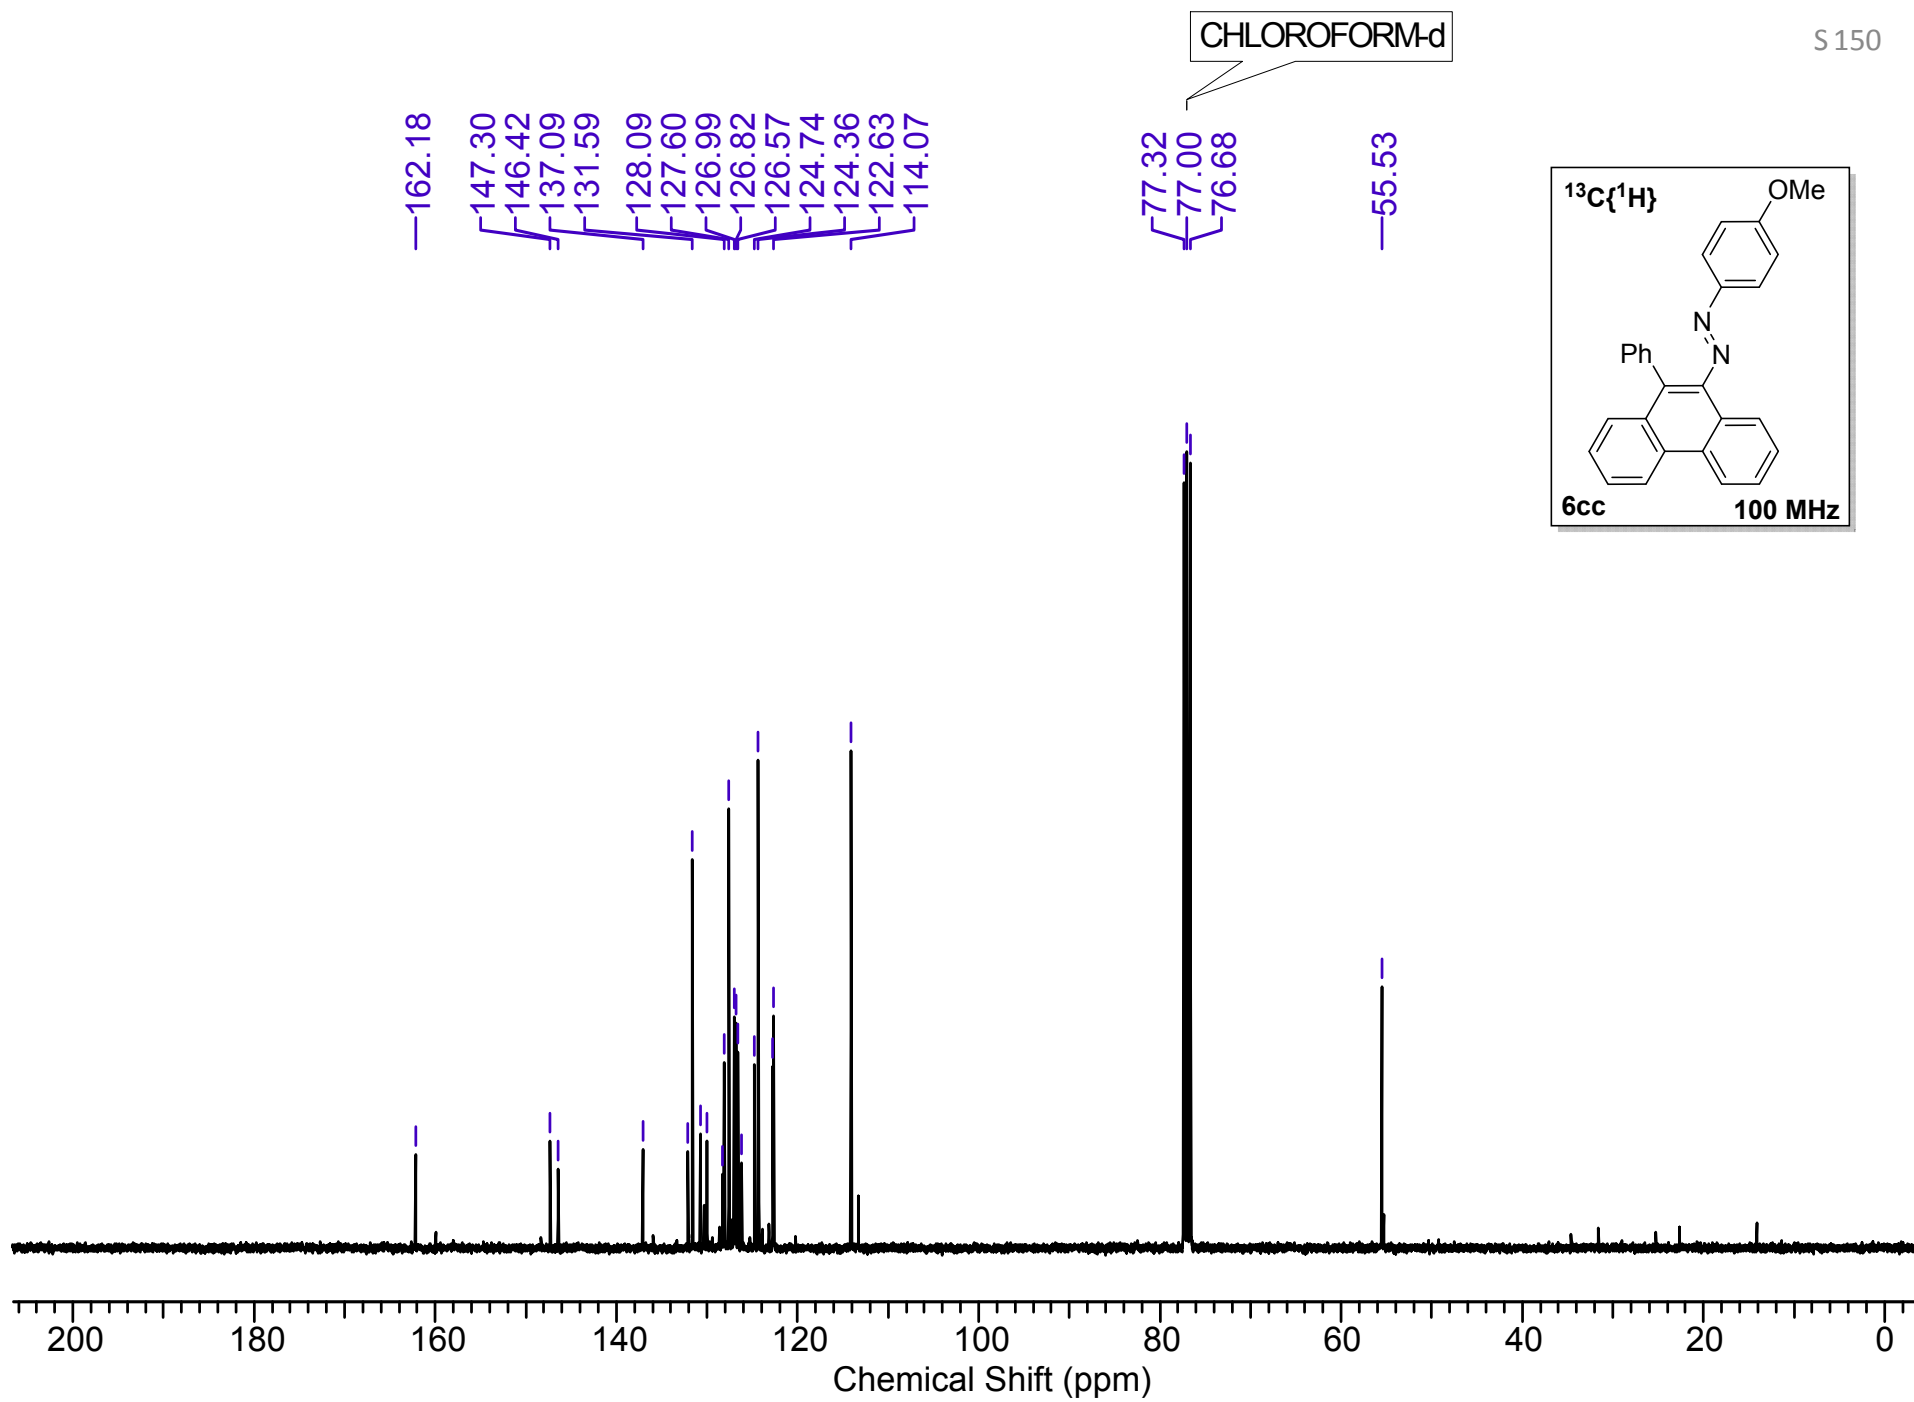

PSD 927

PSD 927 153 (2.804) AM2 (Ar,20000.0,556.28,0.00,LS 3); Sm (SG,  
300.00)

IISER PUNE

1: TOF MS ES+  
4.37e5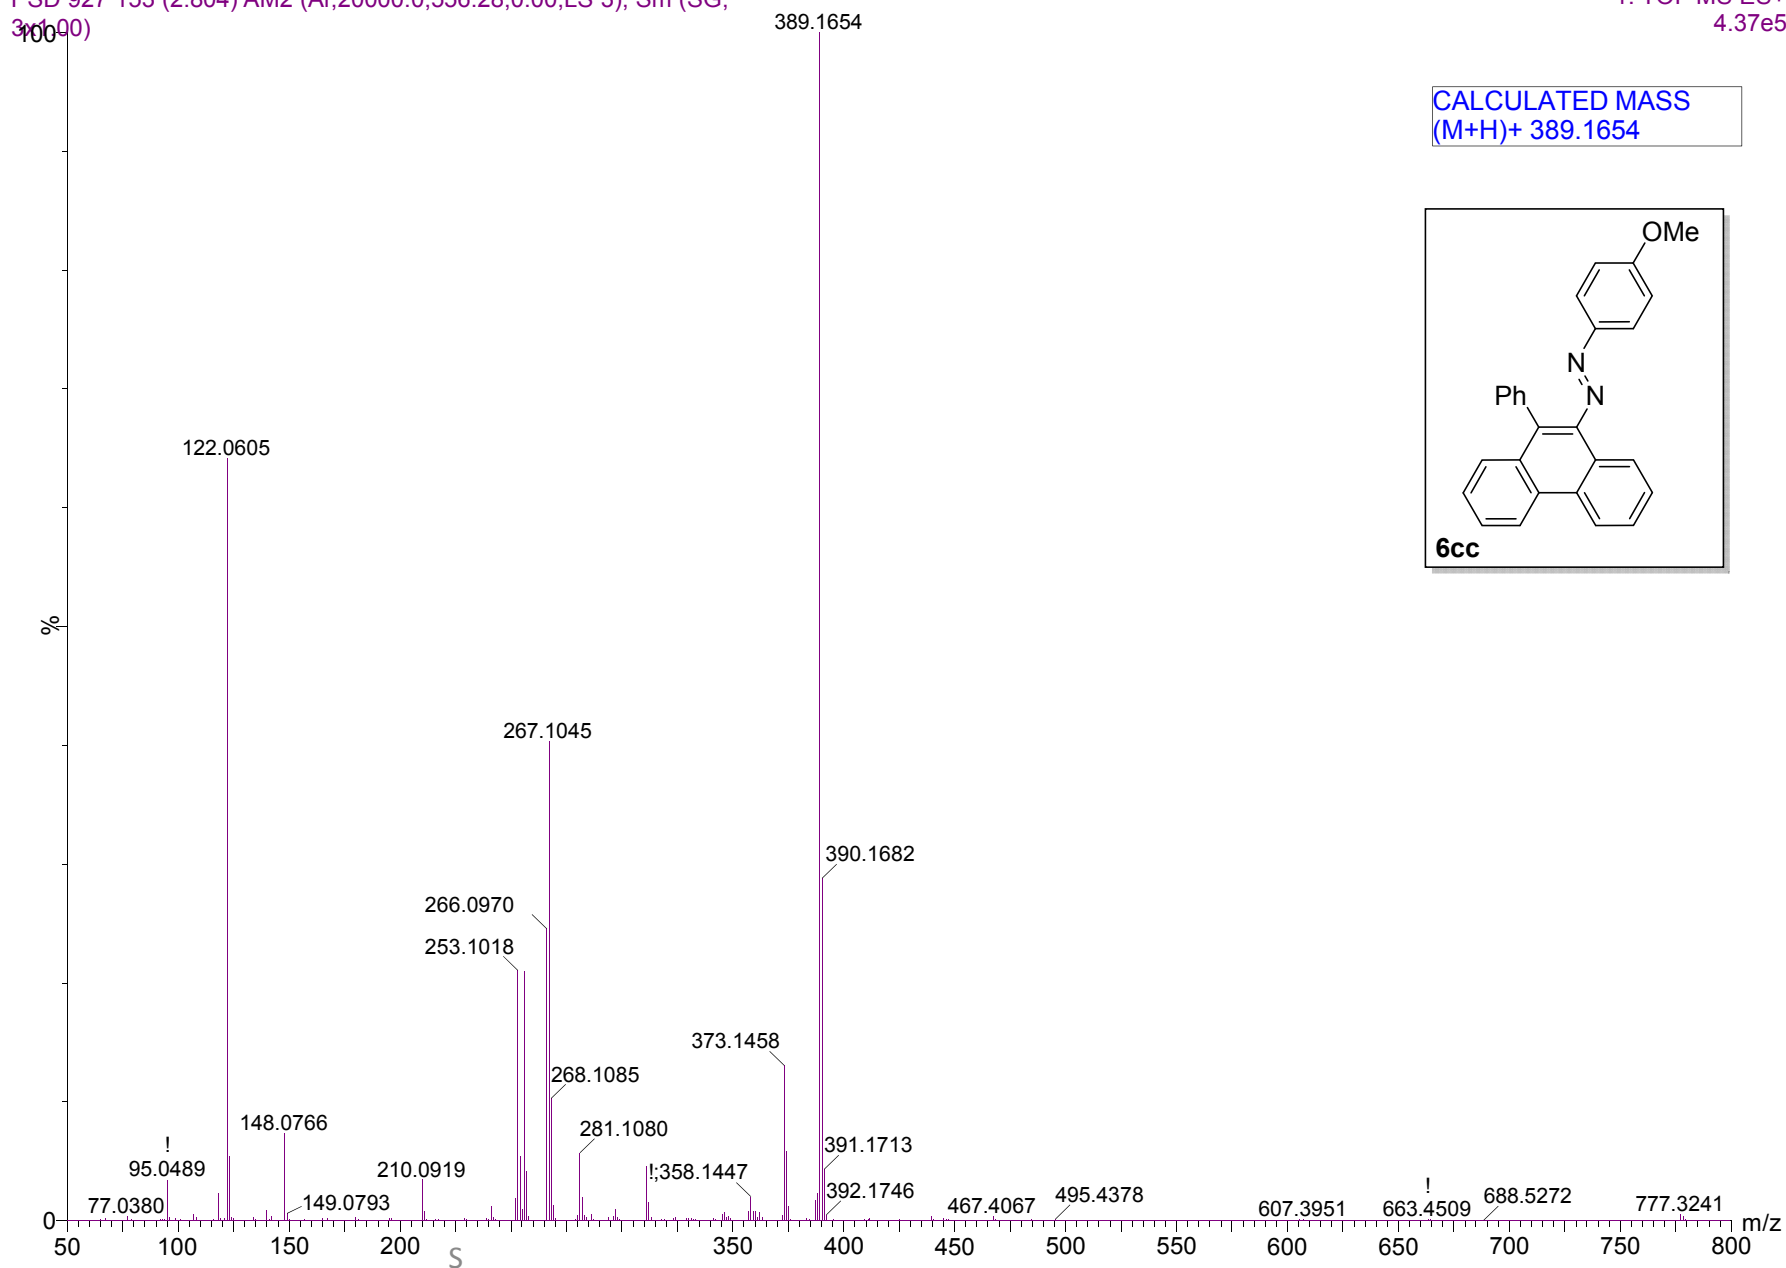CALCULATED MASS  
(M+H)+ 389.1654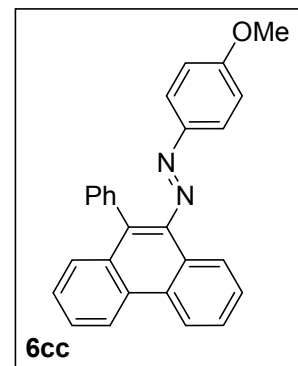

CHLOROFORM-d

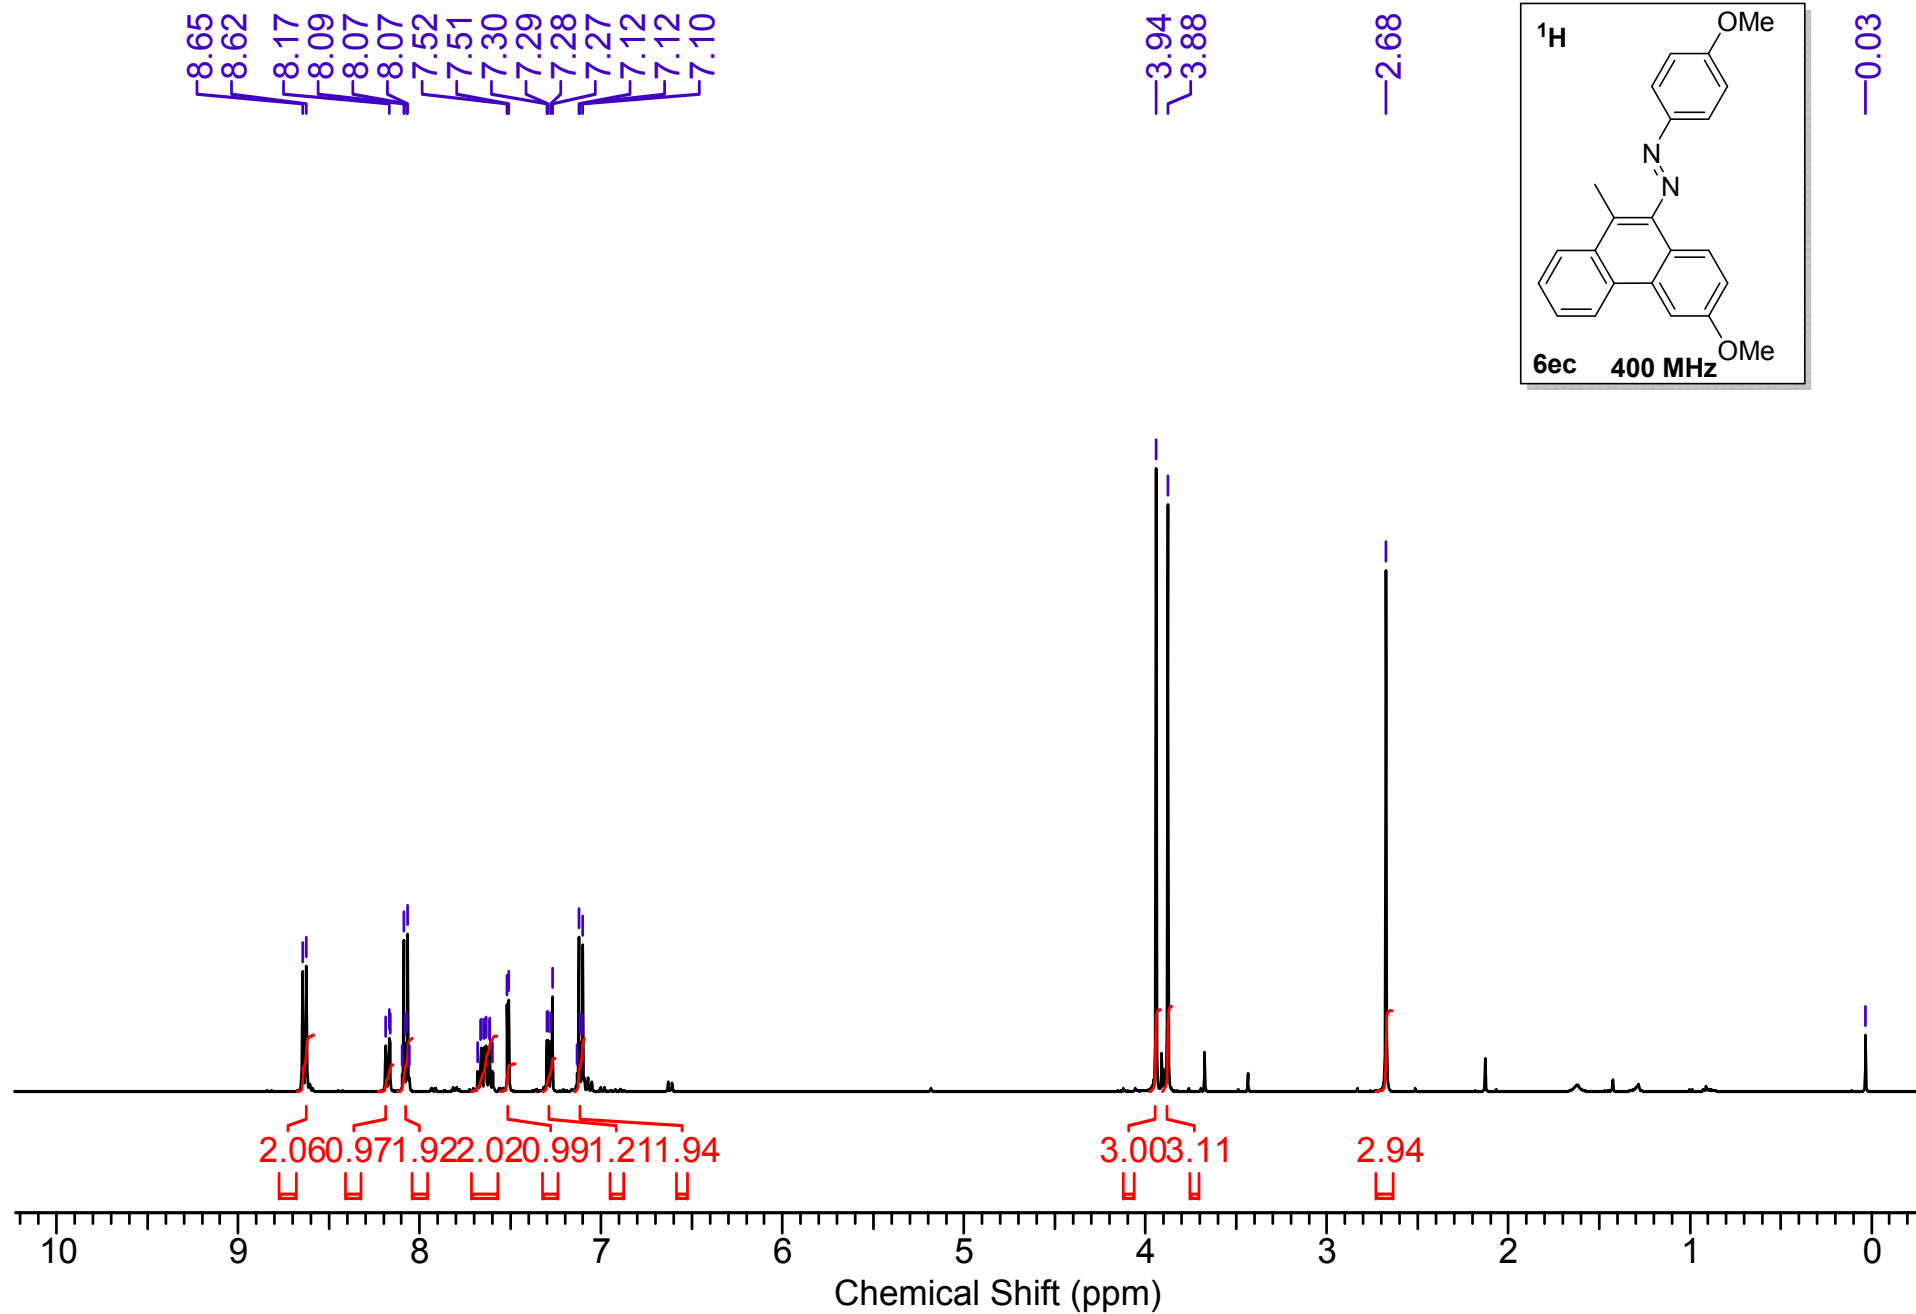



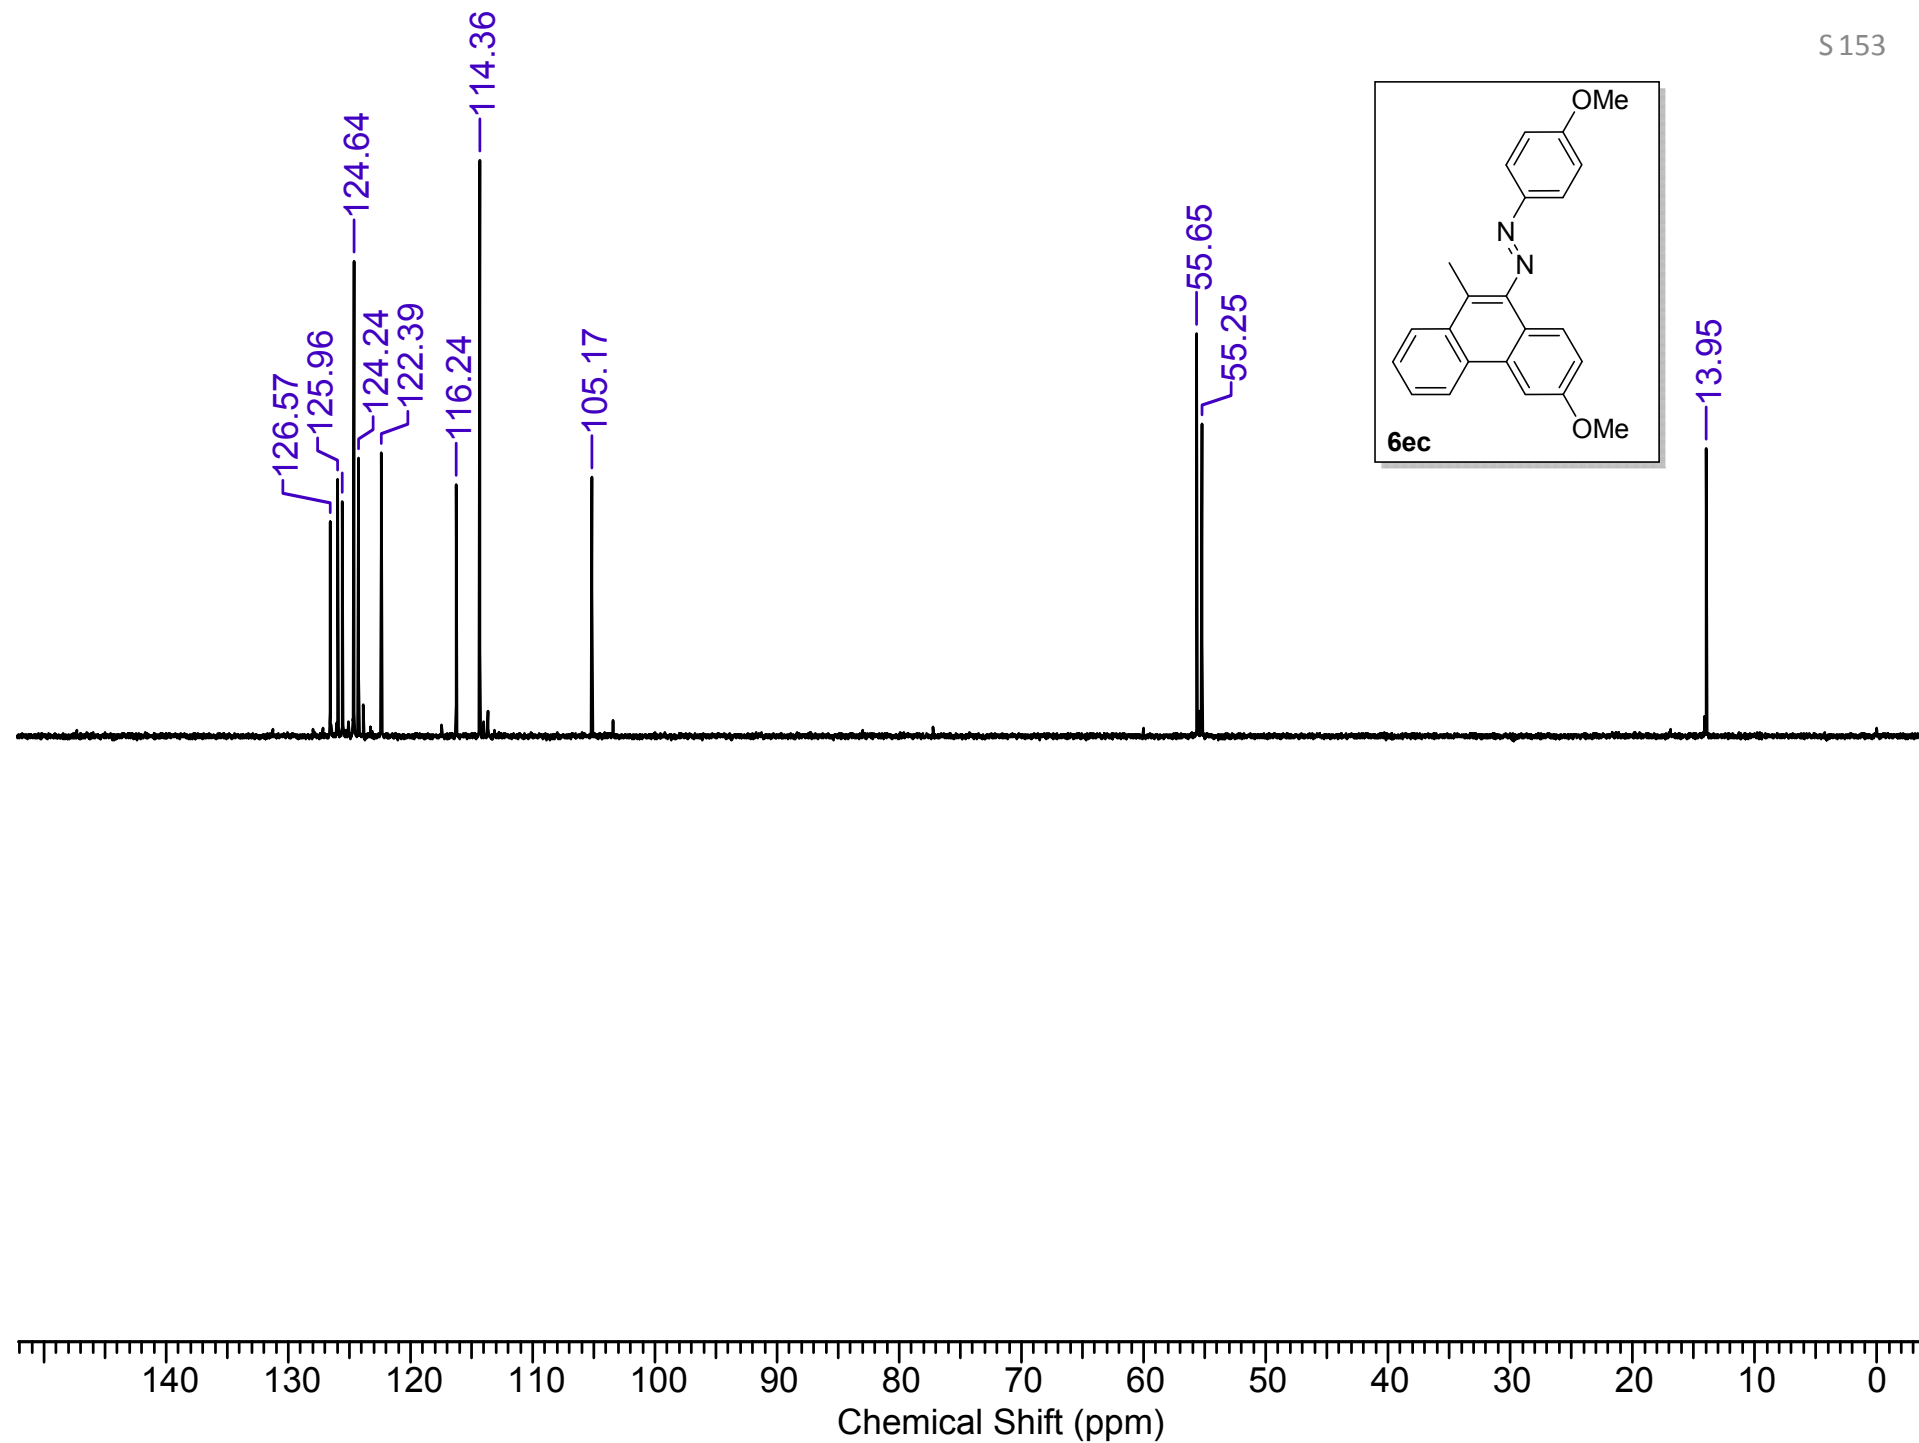

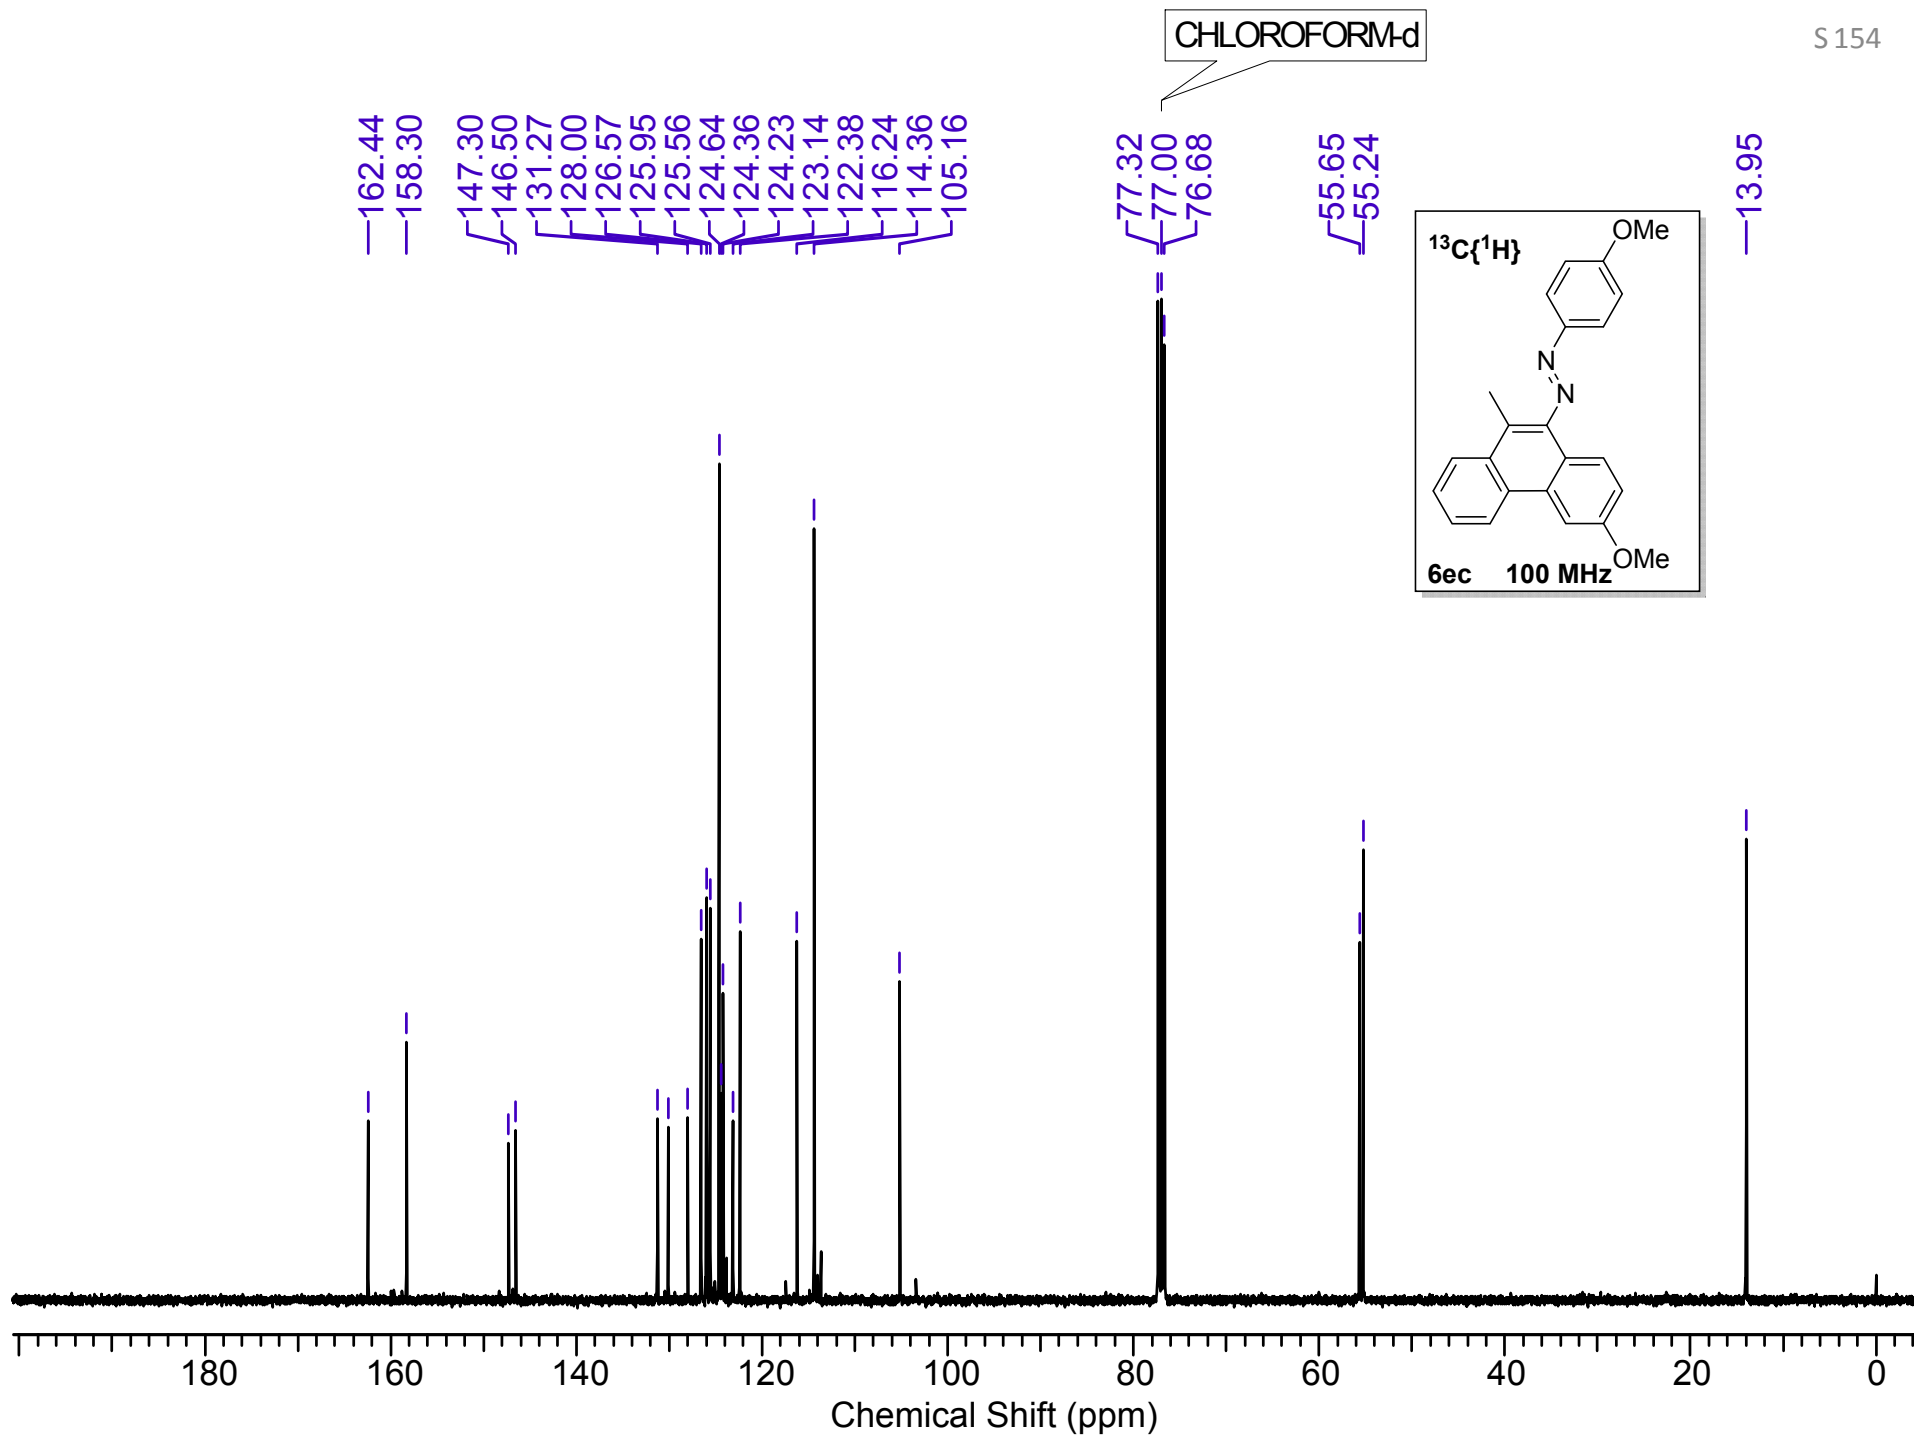

PSD 934

IISER PUNE

PSD 934 172 (3.148) AM2 (Ar,20000.0,556.28,0.00,LS 3); Sm (SG,  
300.00)1: TOF MS ES+  
6.36e4CALCULATED MASS  
(M+H)<sup>+</sup> 357.1603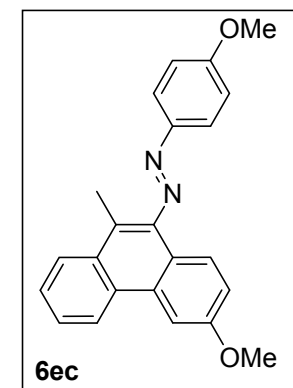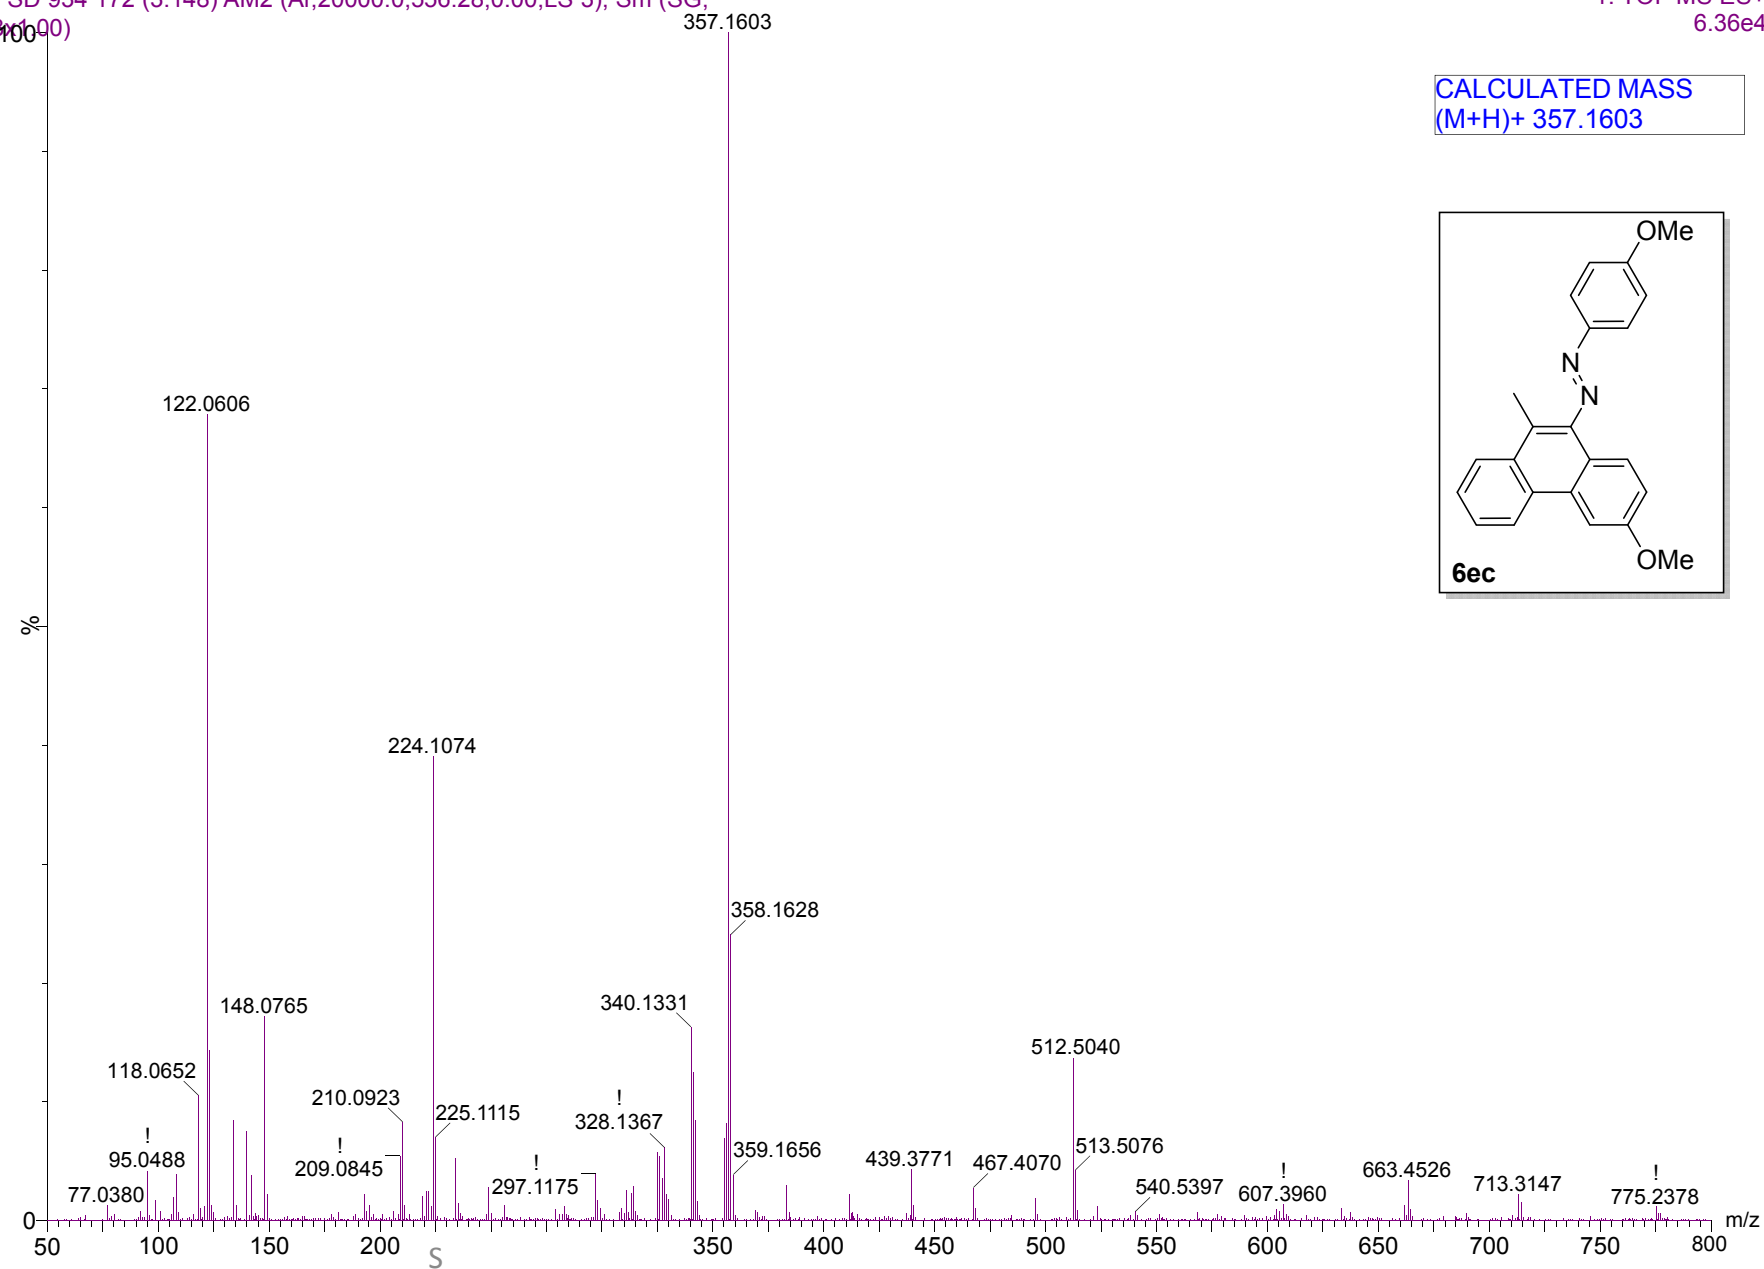

CHLOROFORM-d

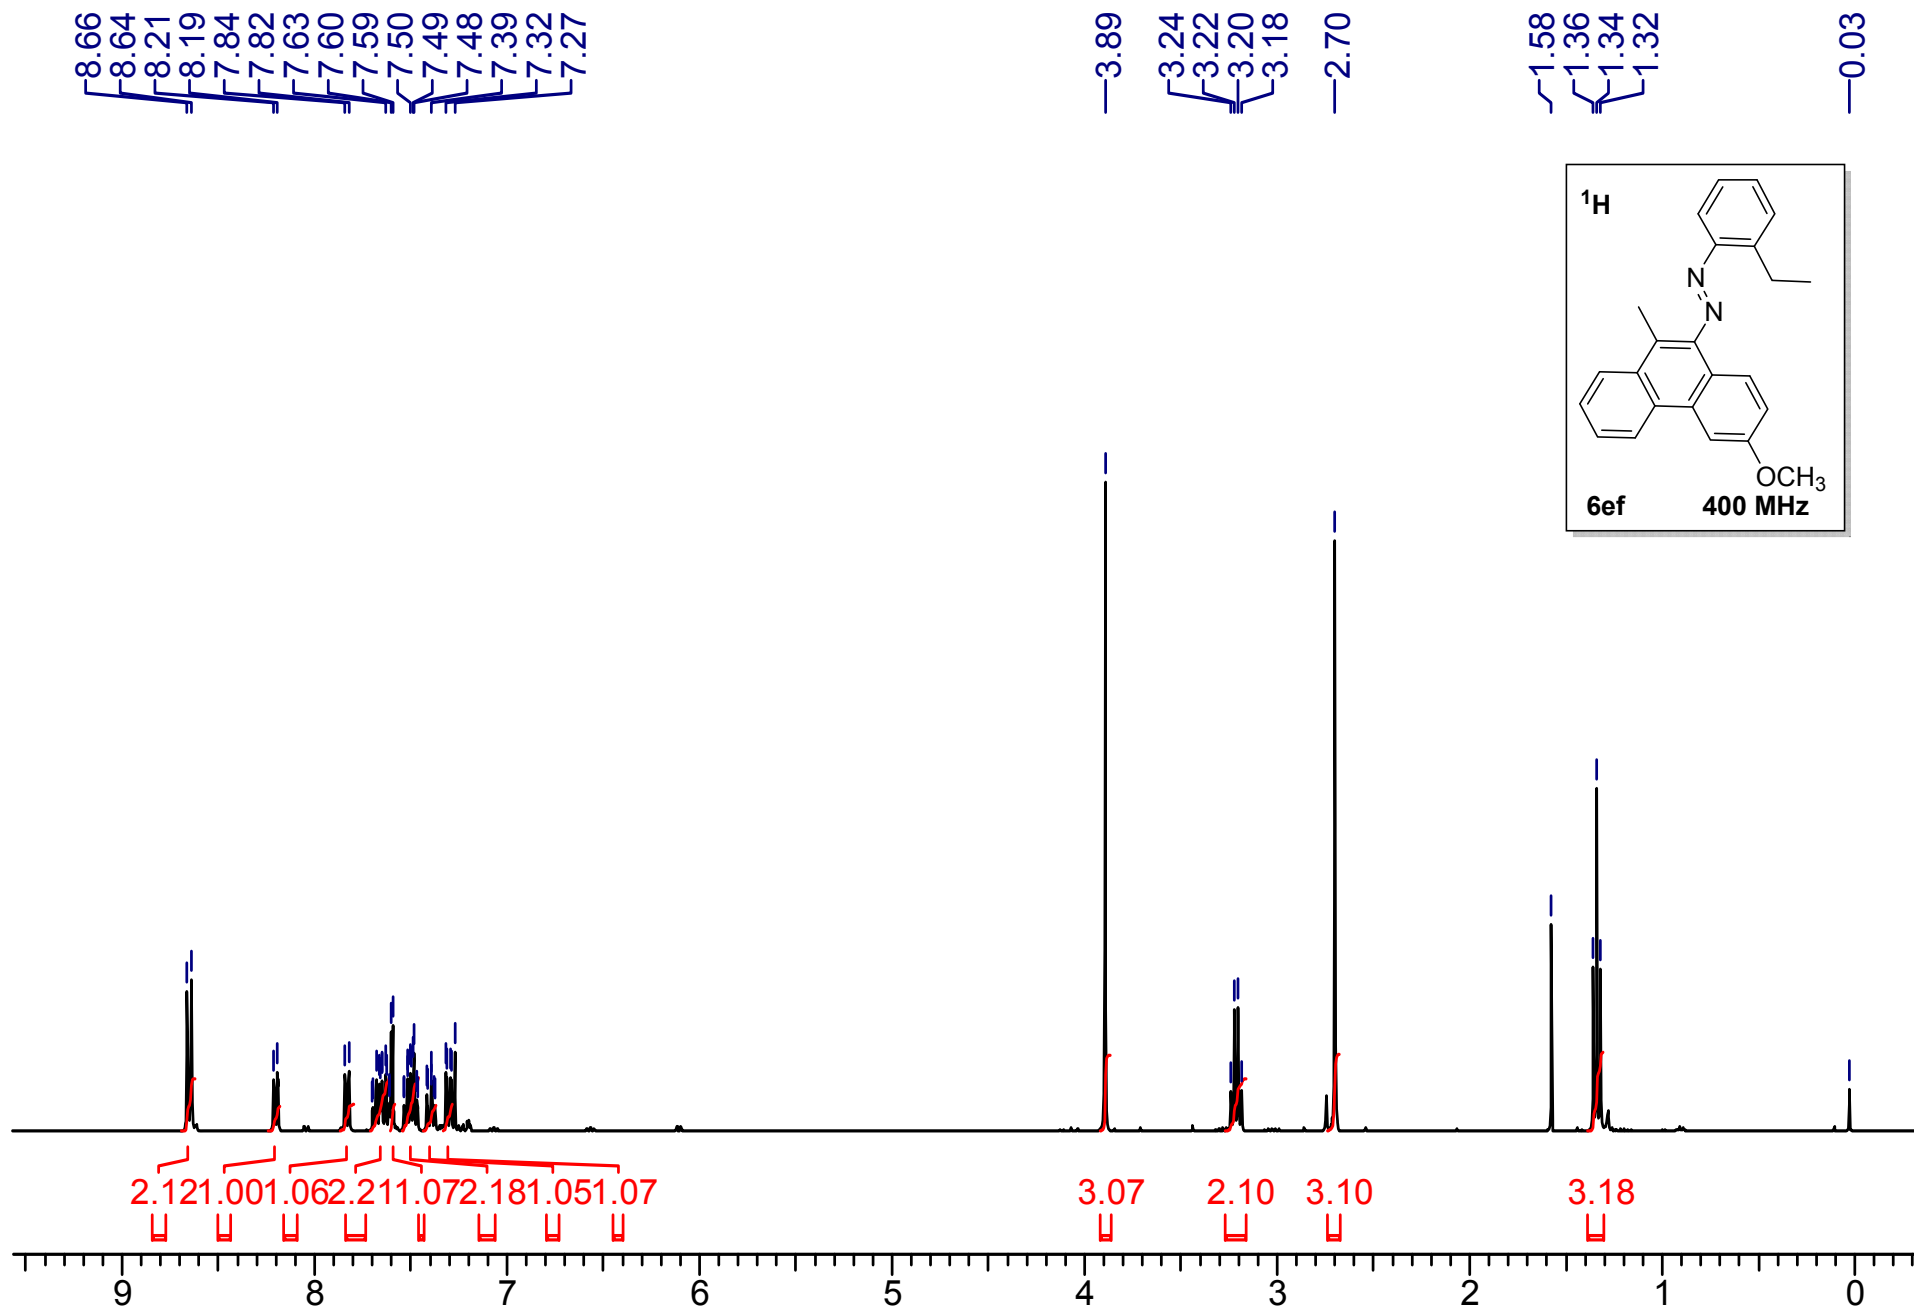

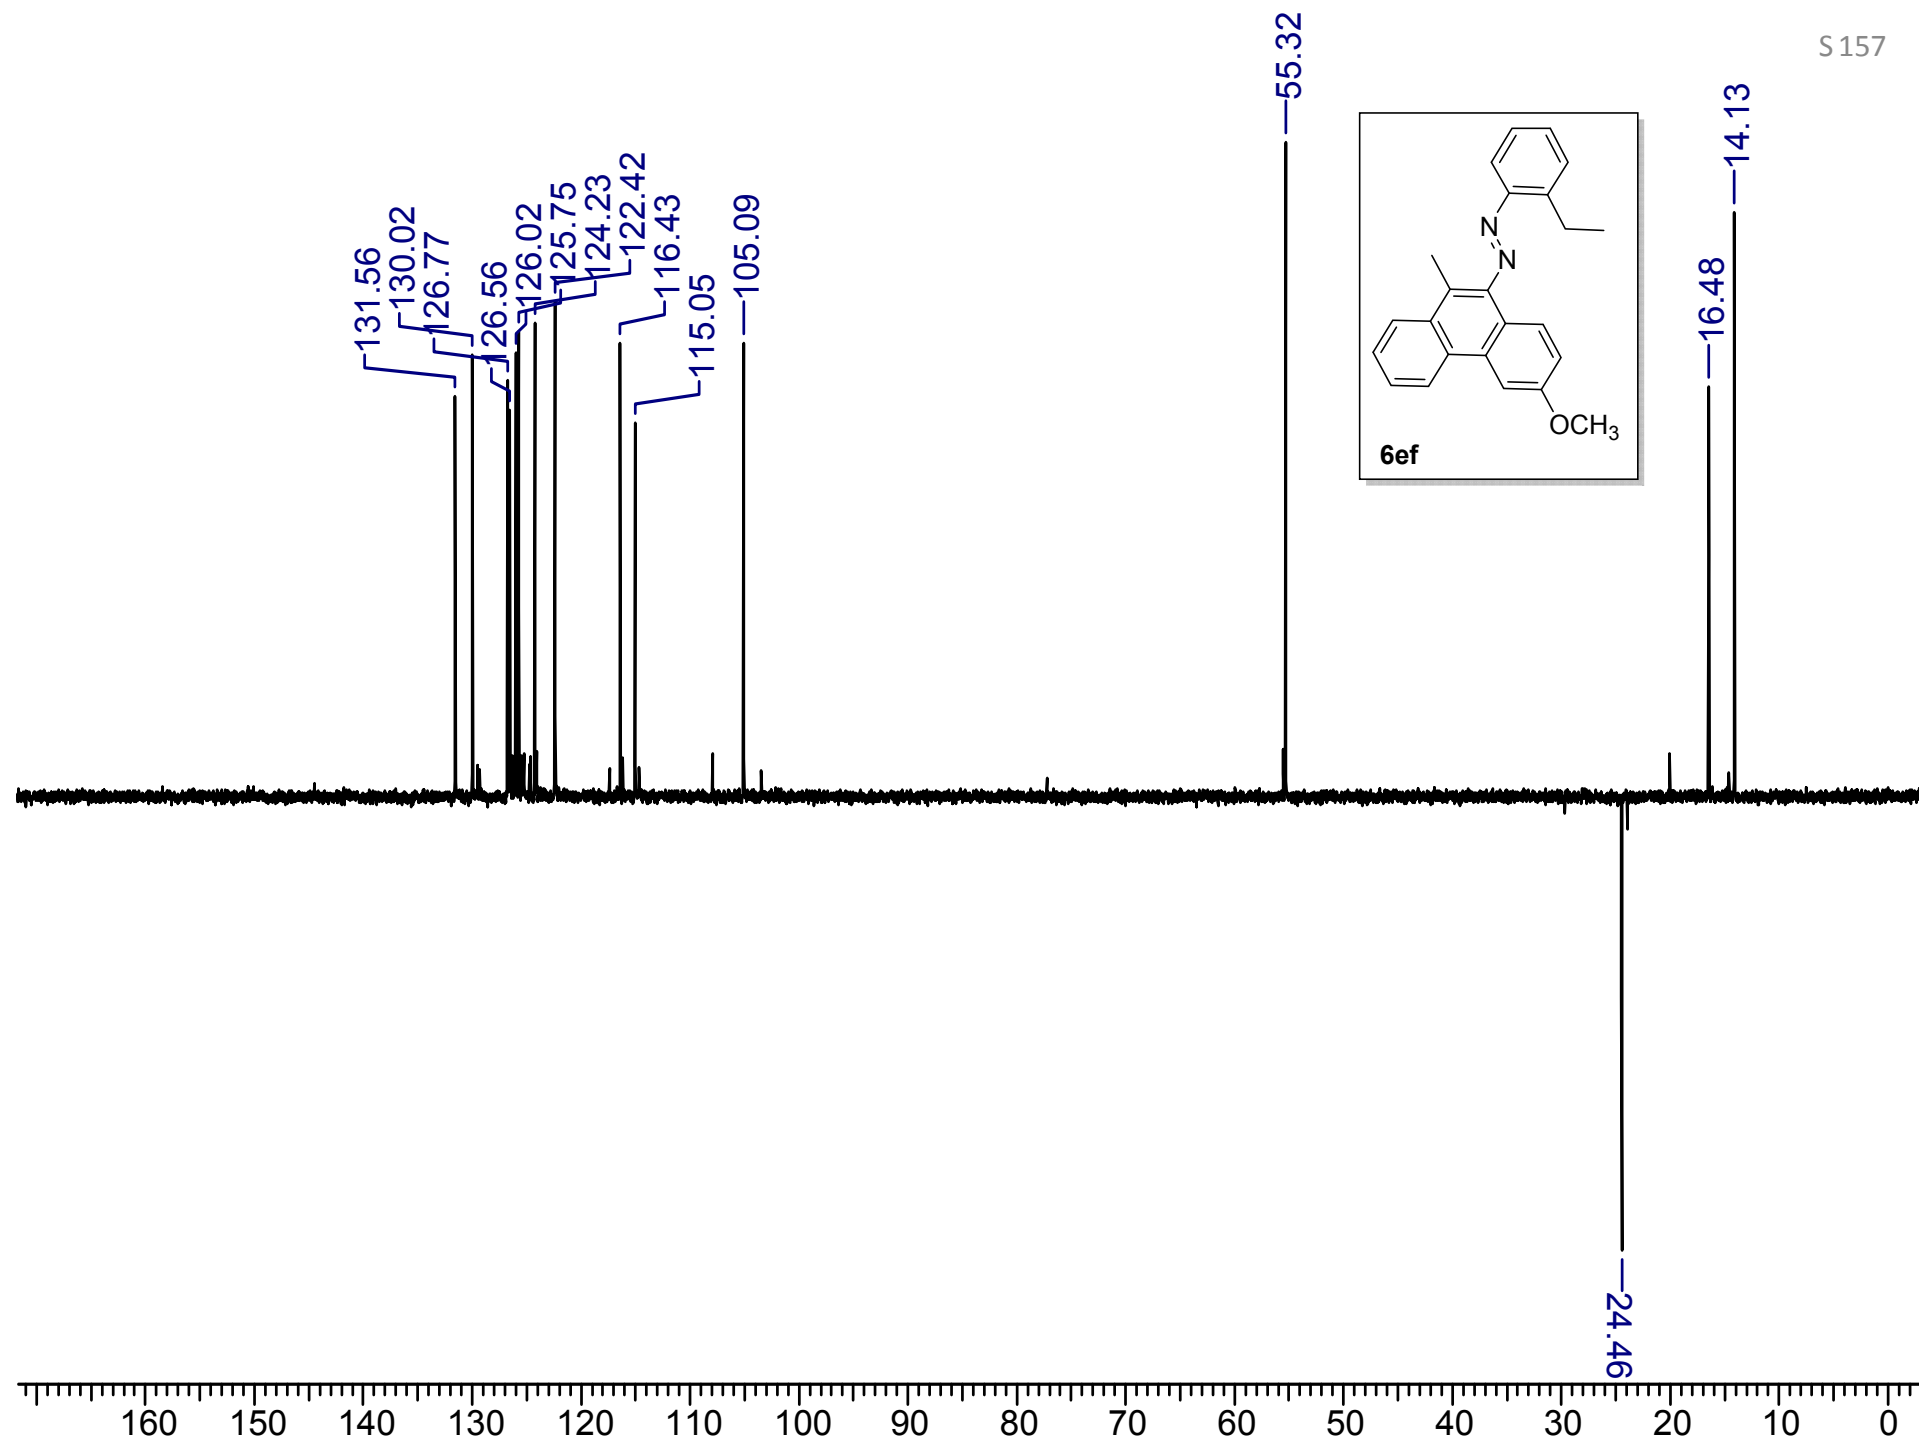

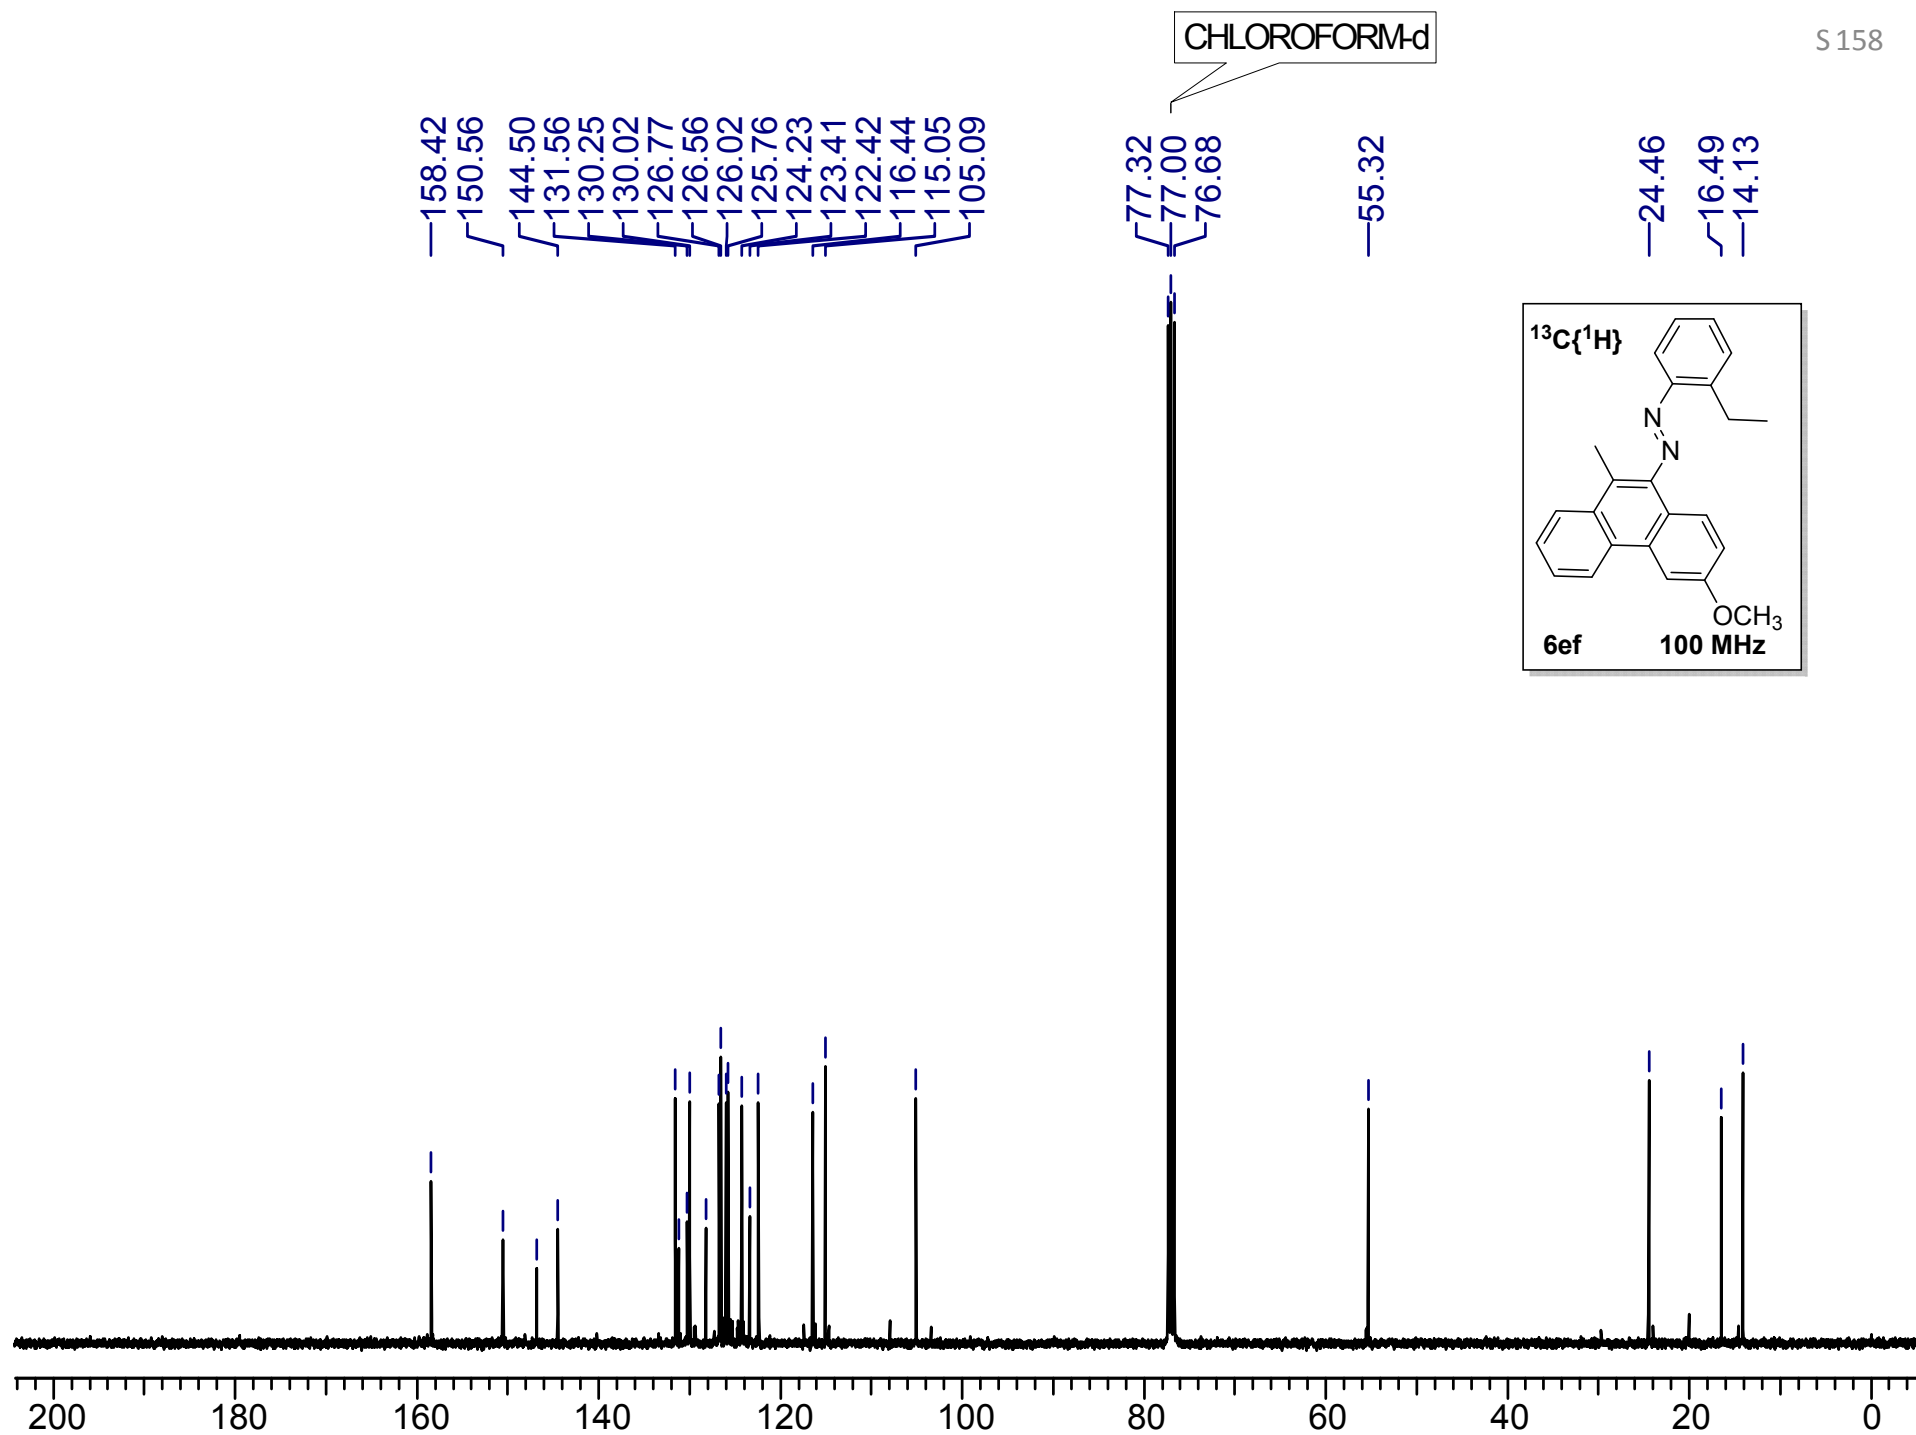

Y 935 K

IISER PUNE

1: TOF MS ES+  
9.83e4Y 935 K 158 (2.889) AM2 (Ar,20000.0,556.28,0.00,LS 3); Sm (SG,  
300.00)CALCULATED MASS  
(M+H)<sup>+</sup> 355.1810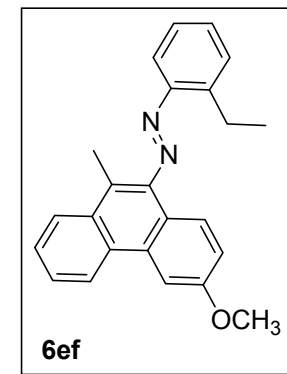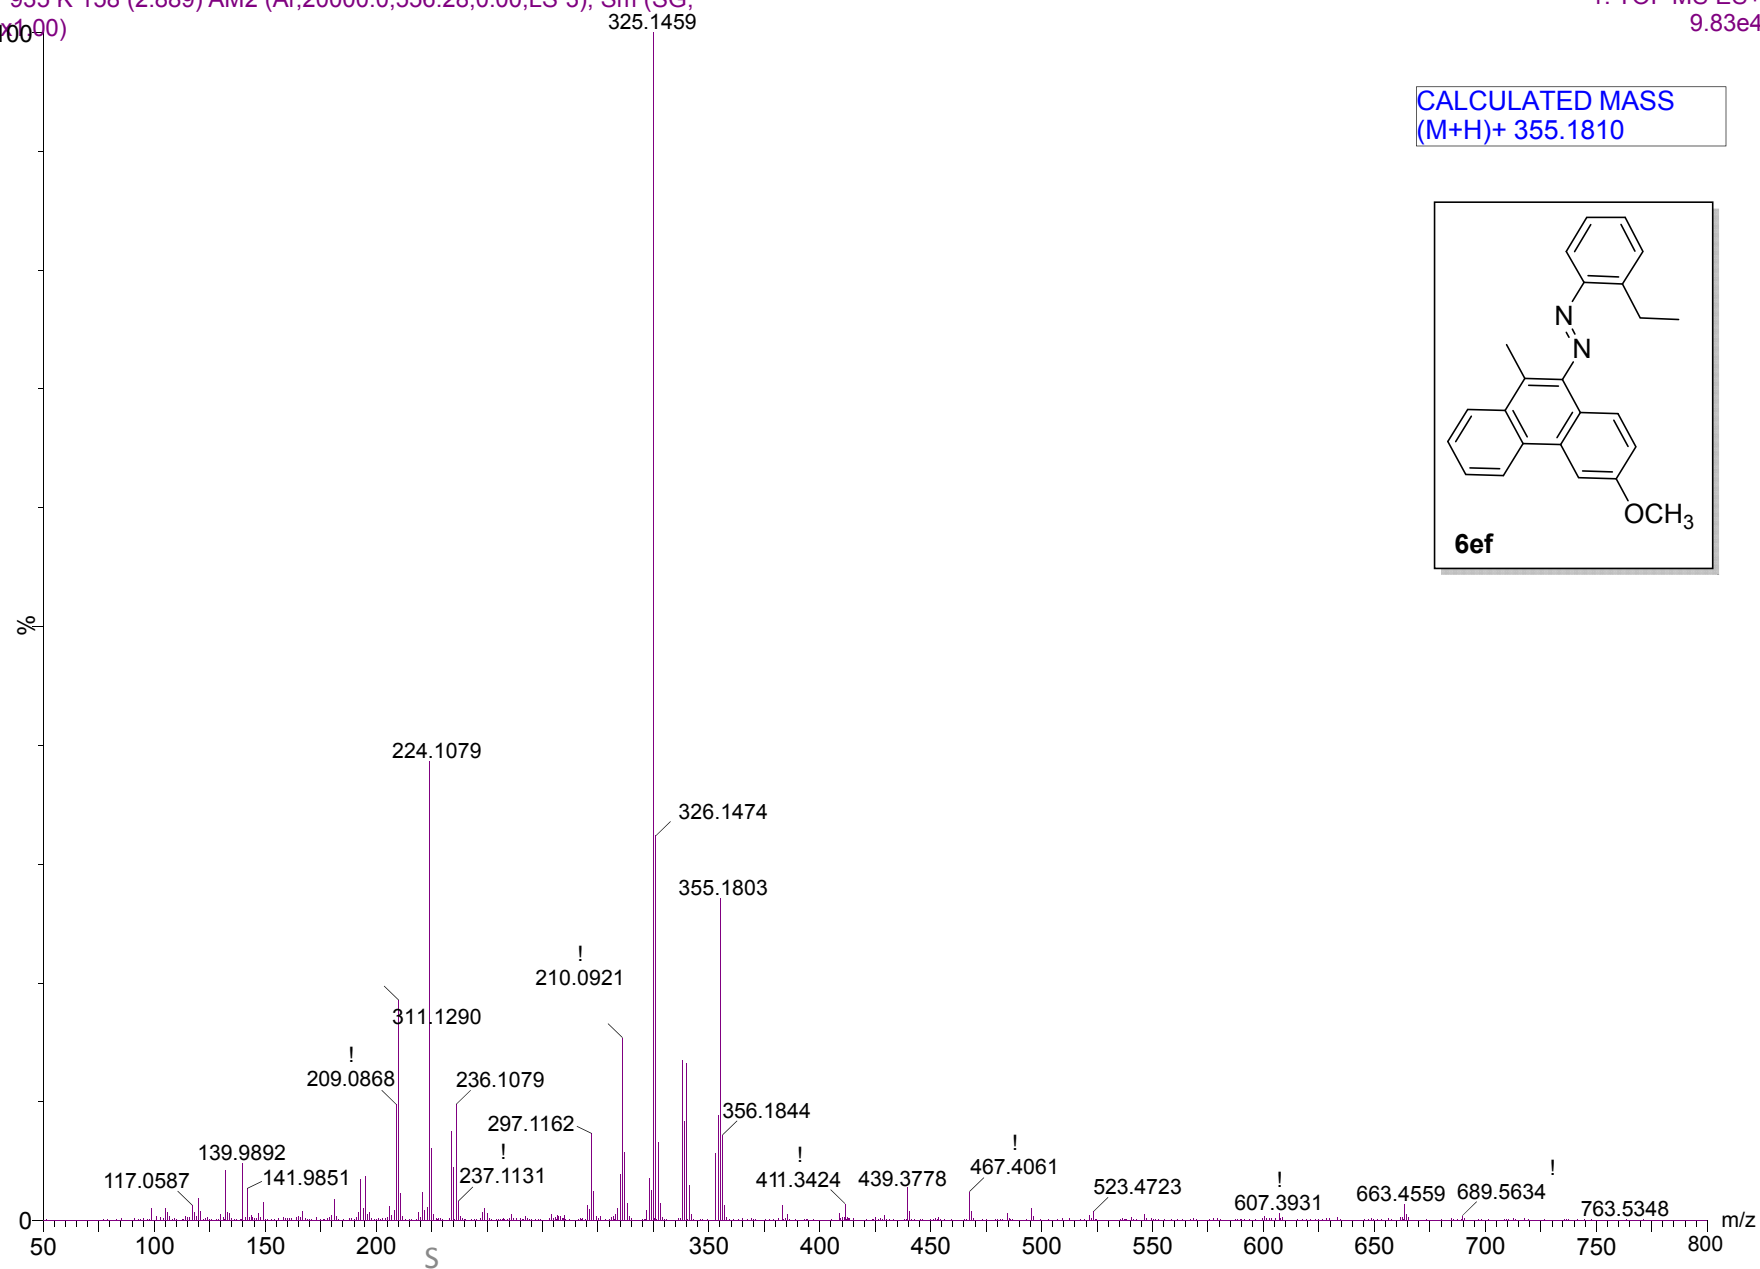

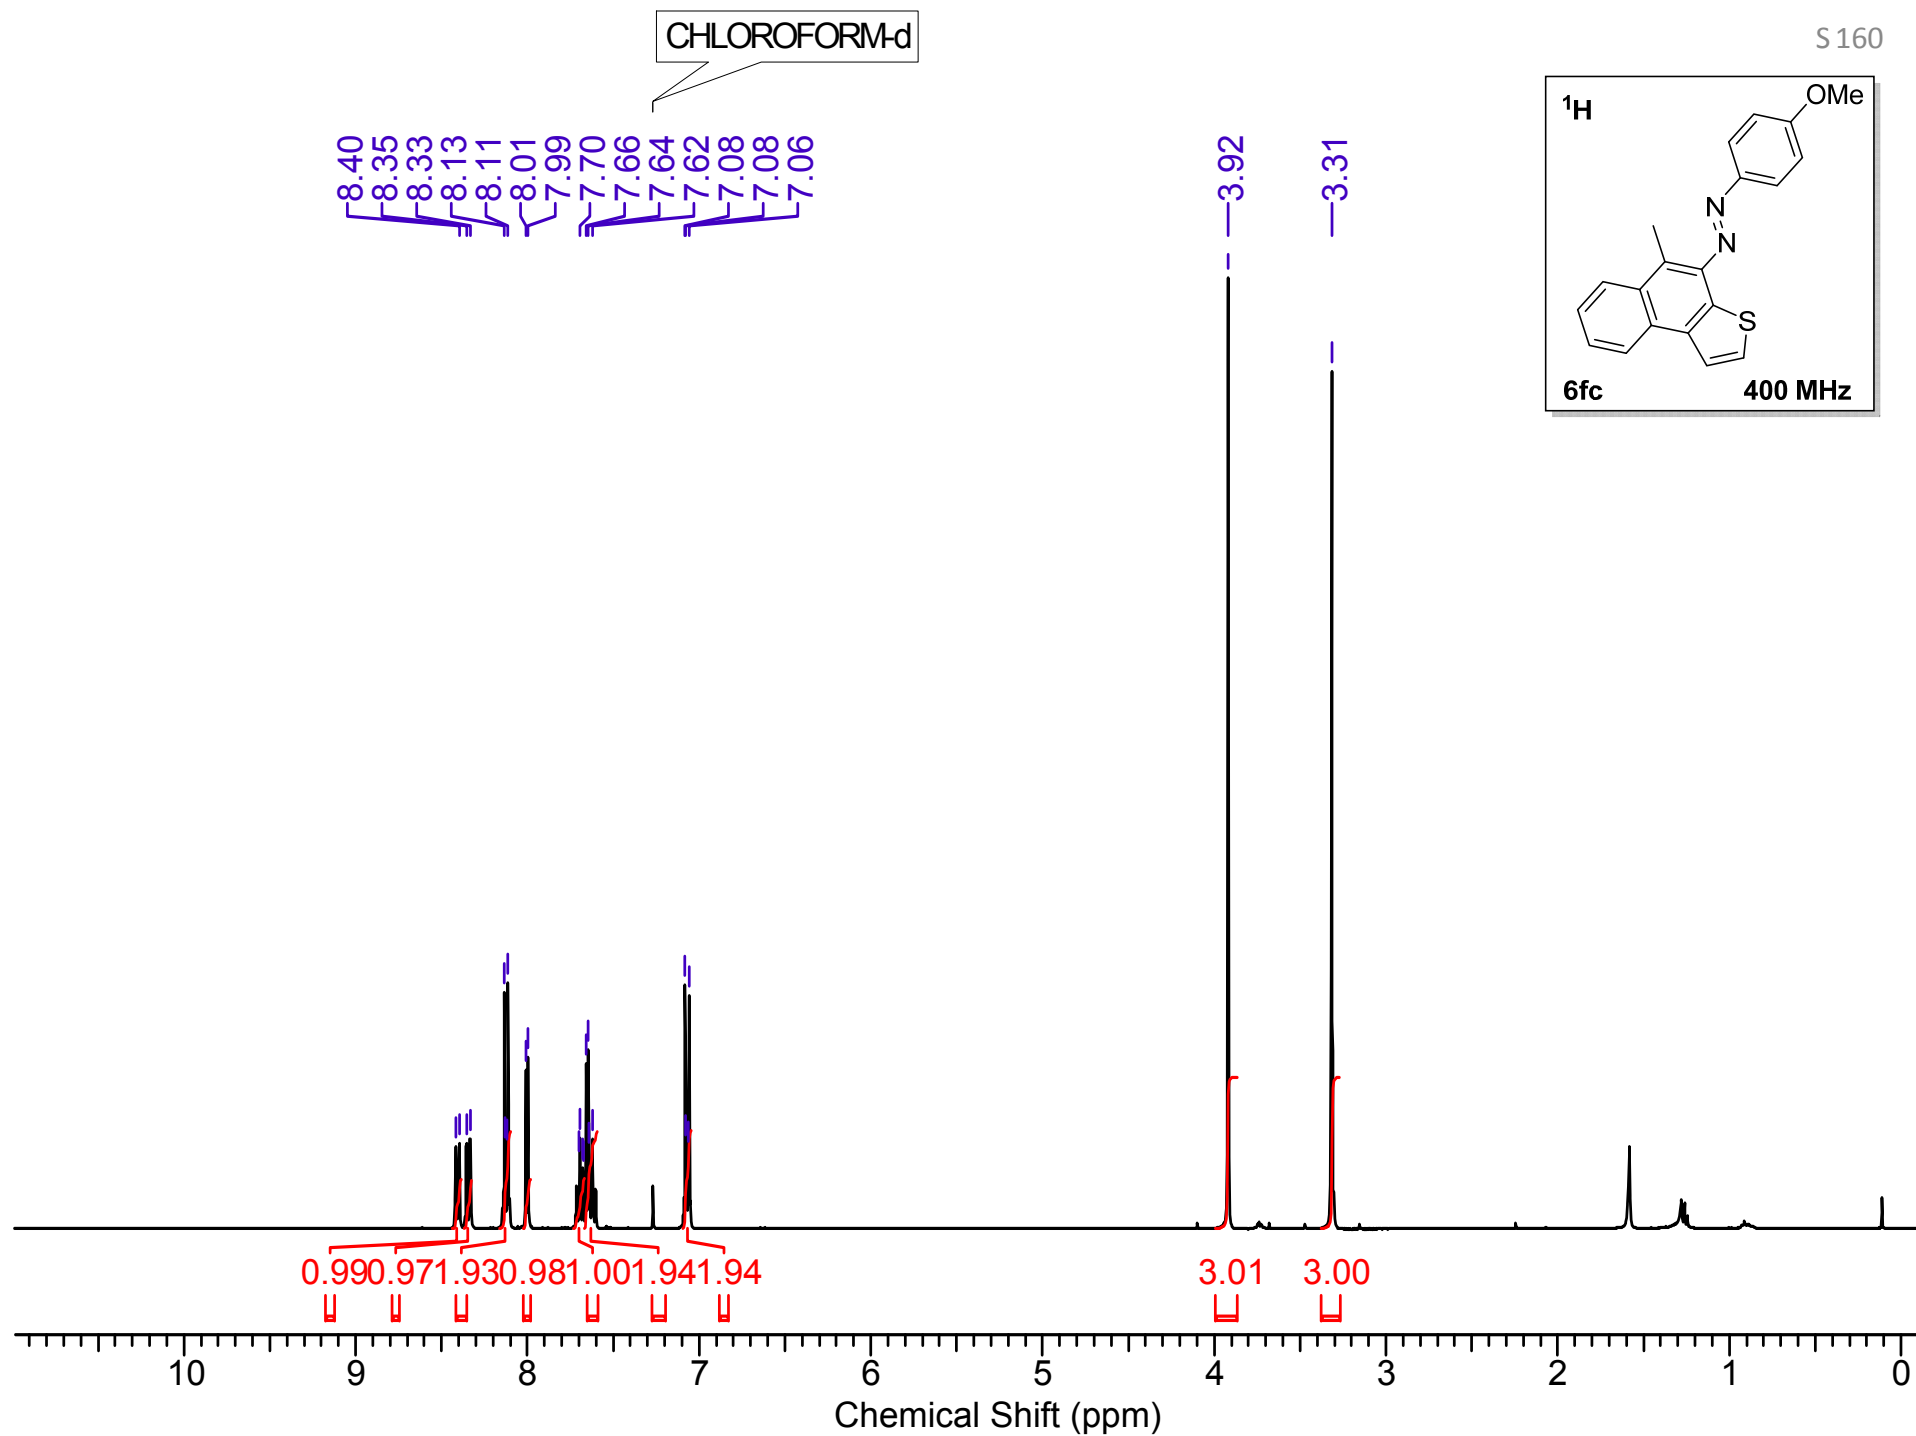



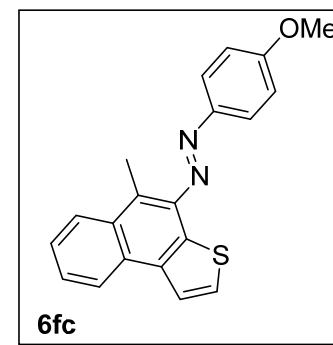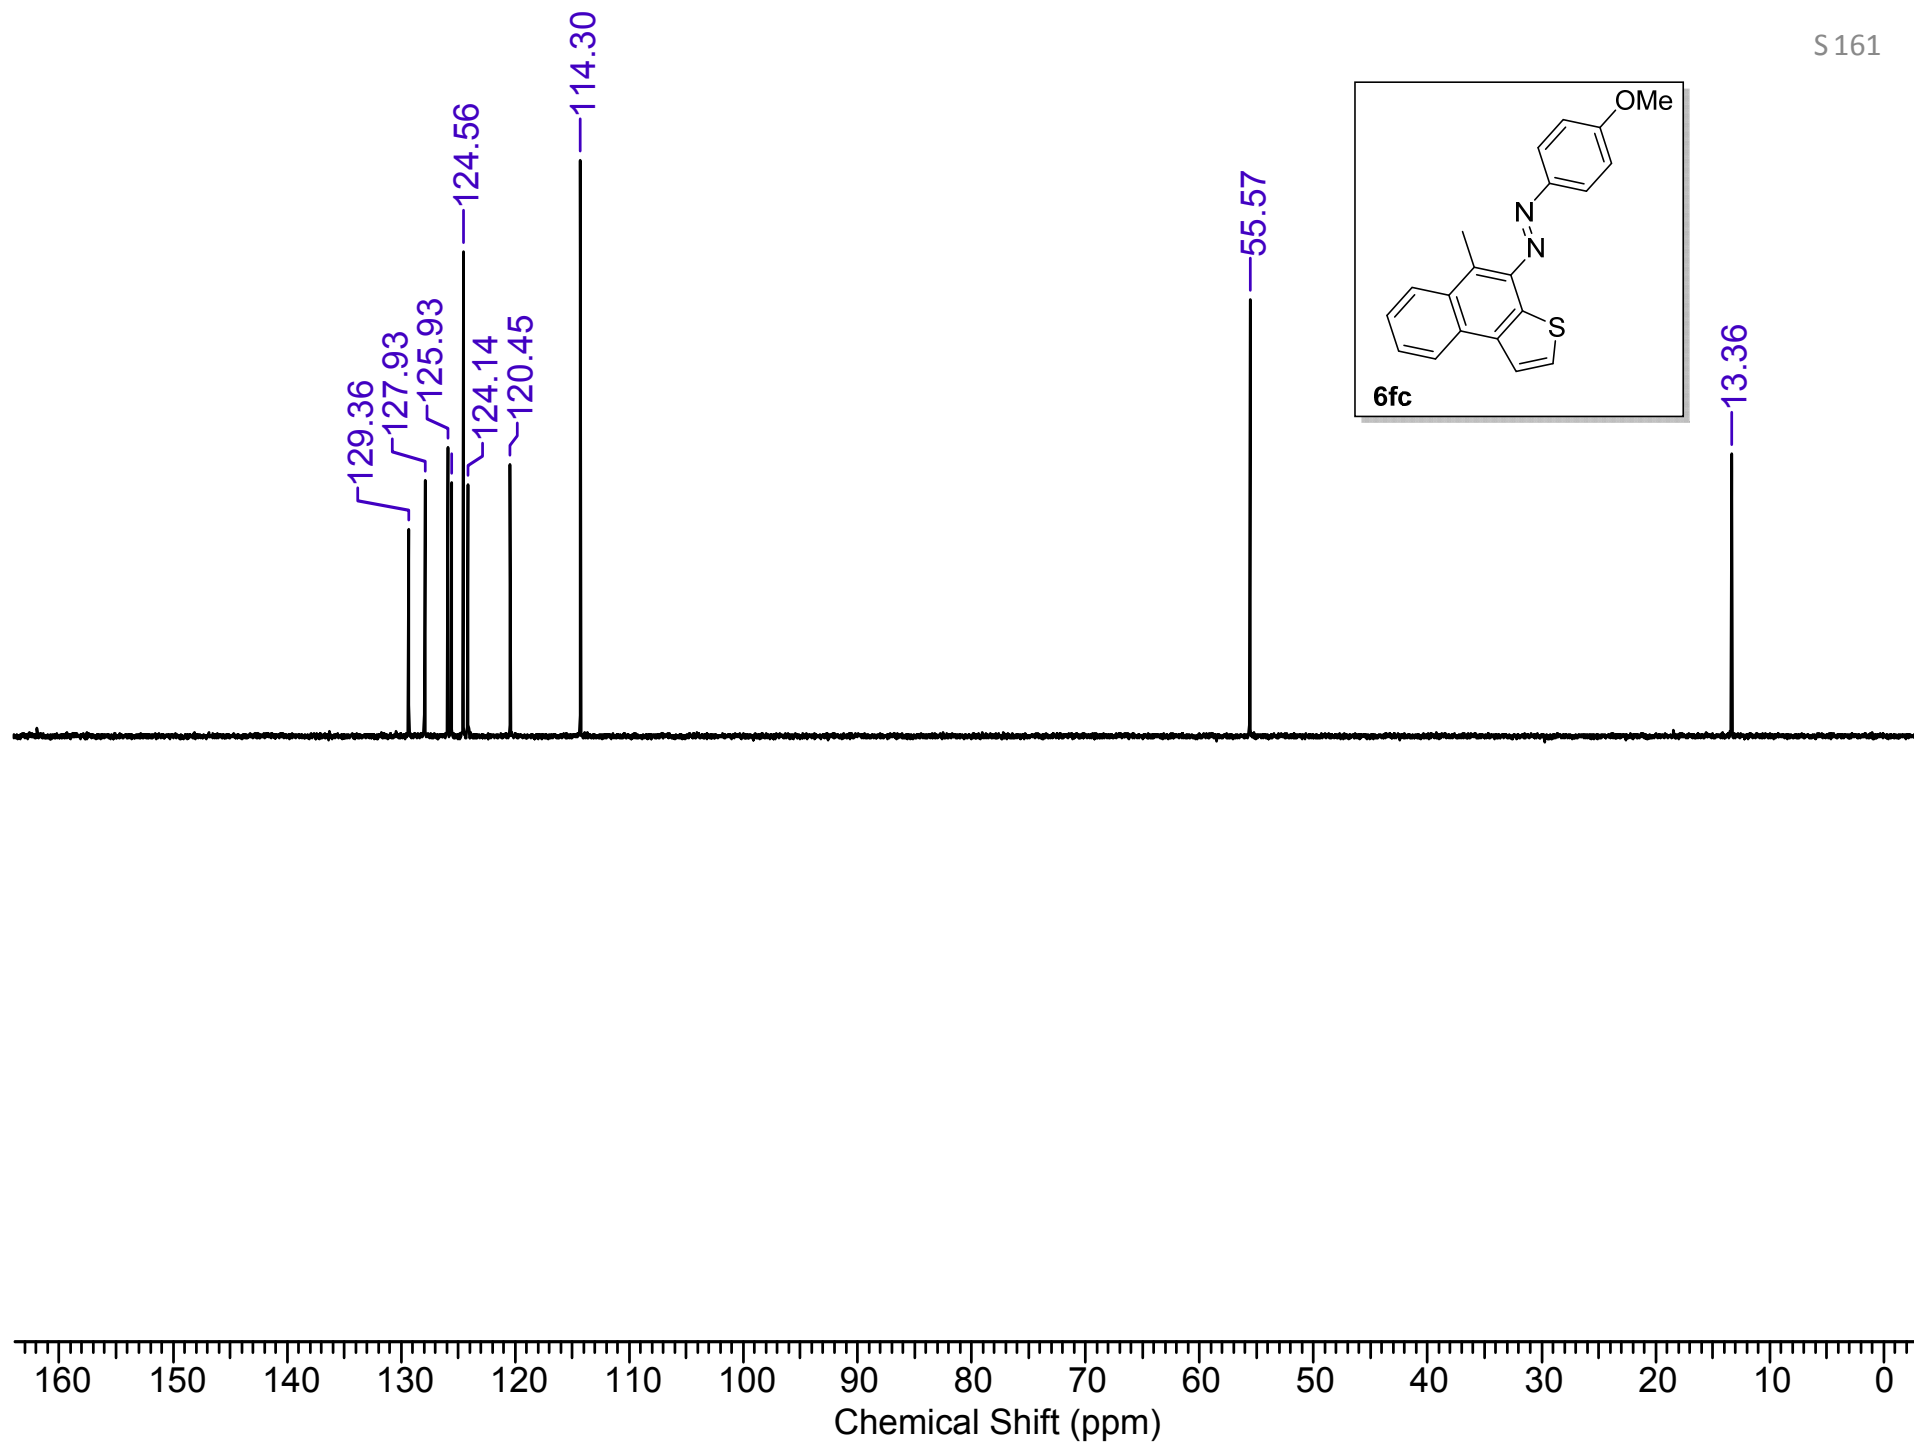

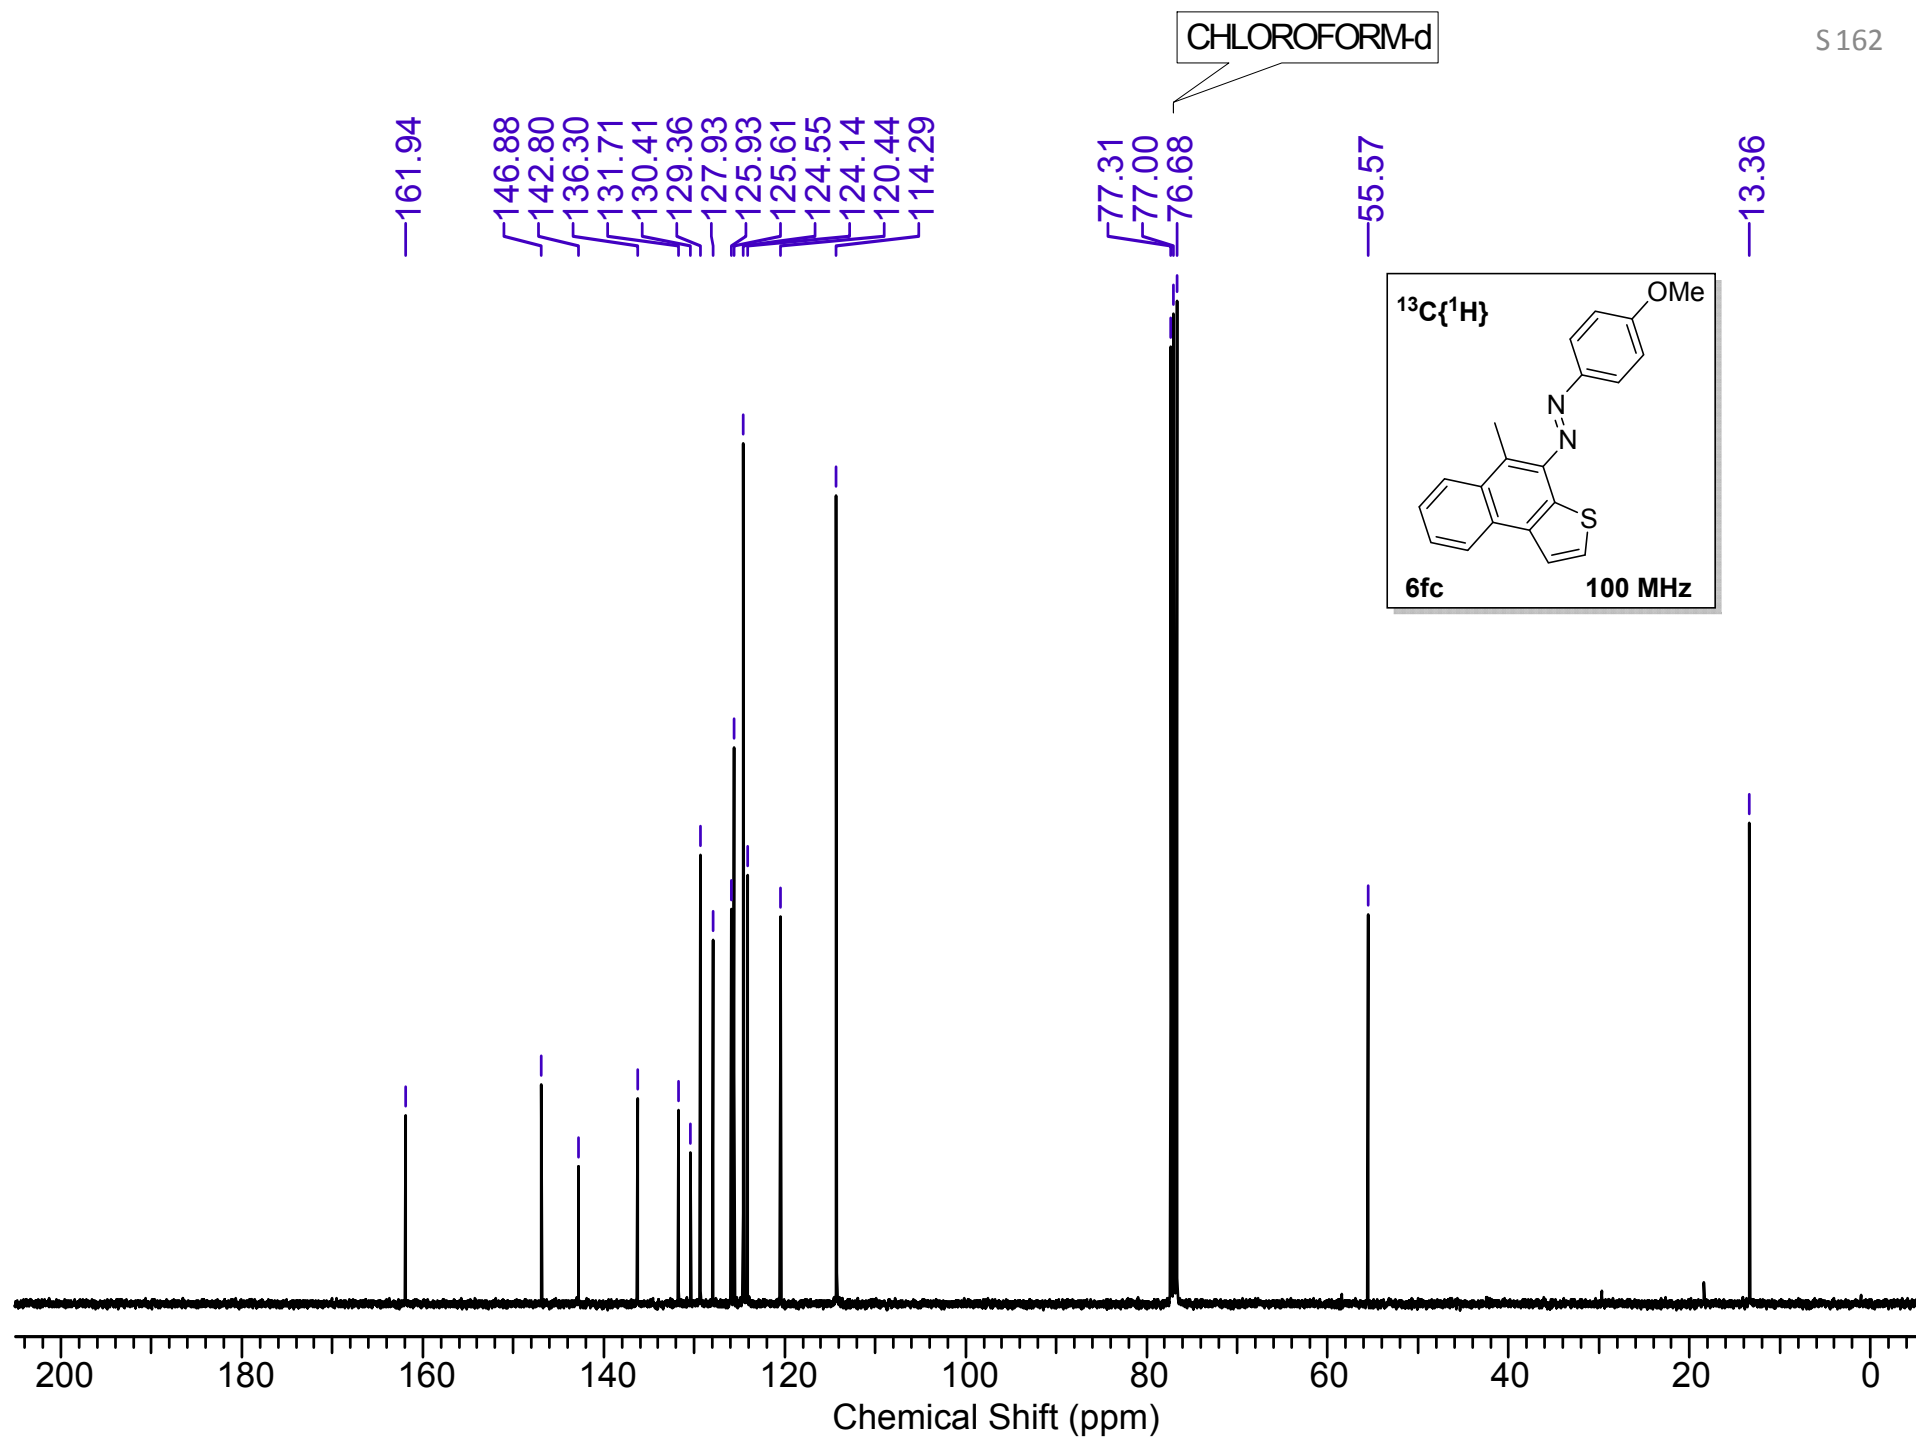

PSD 925

IISER PUNE

1: TOF MS ES+  
7.22e4PSD 925 194 (3.543) AM2 (Ar,20000.0,556.28,0.00,LS 3); Sm (SG,  
310.00)CALCULATED MASS  
(M+H)+ 333.1061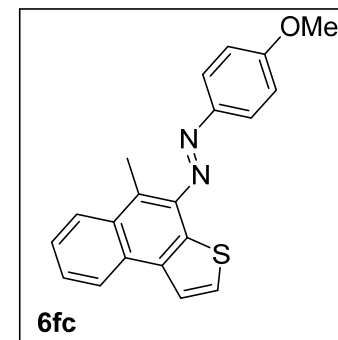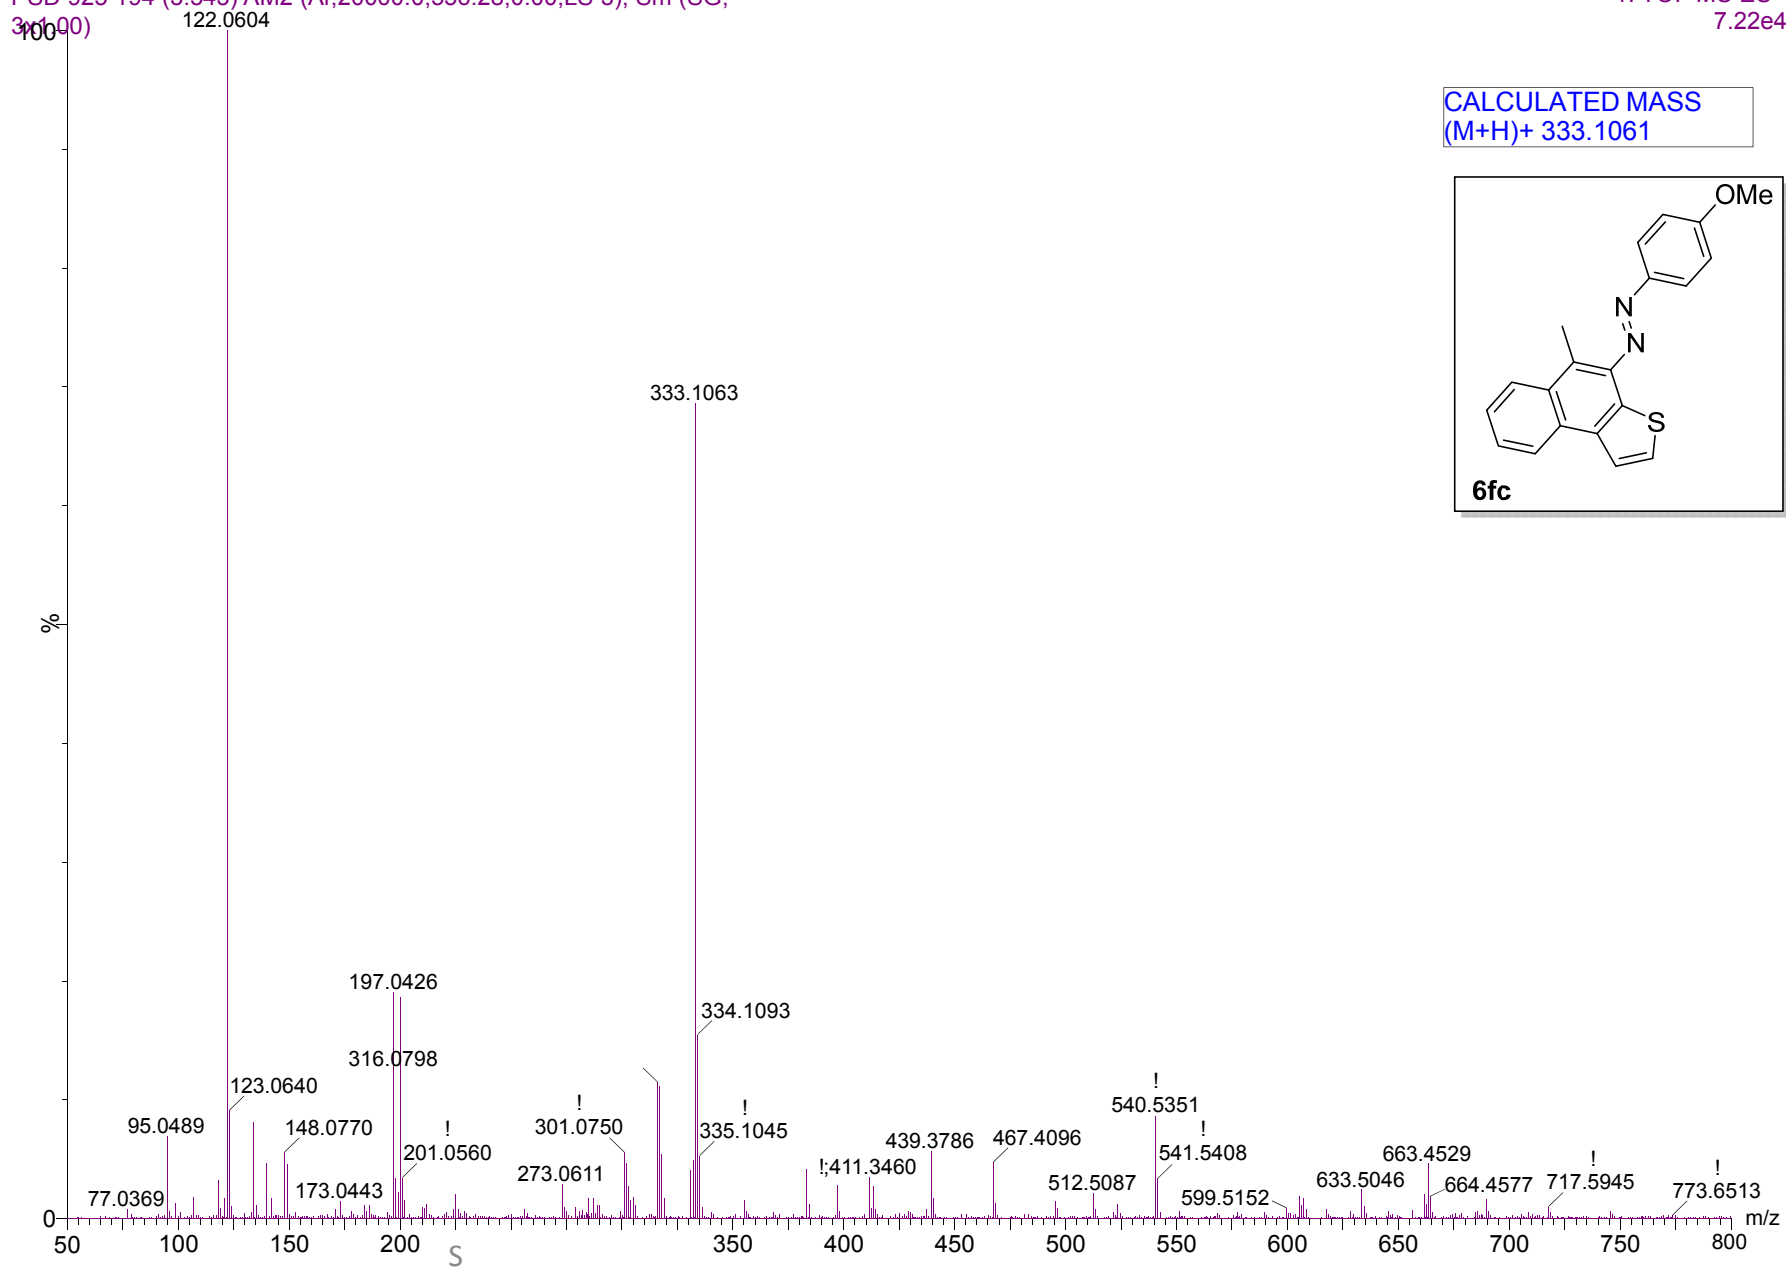

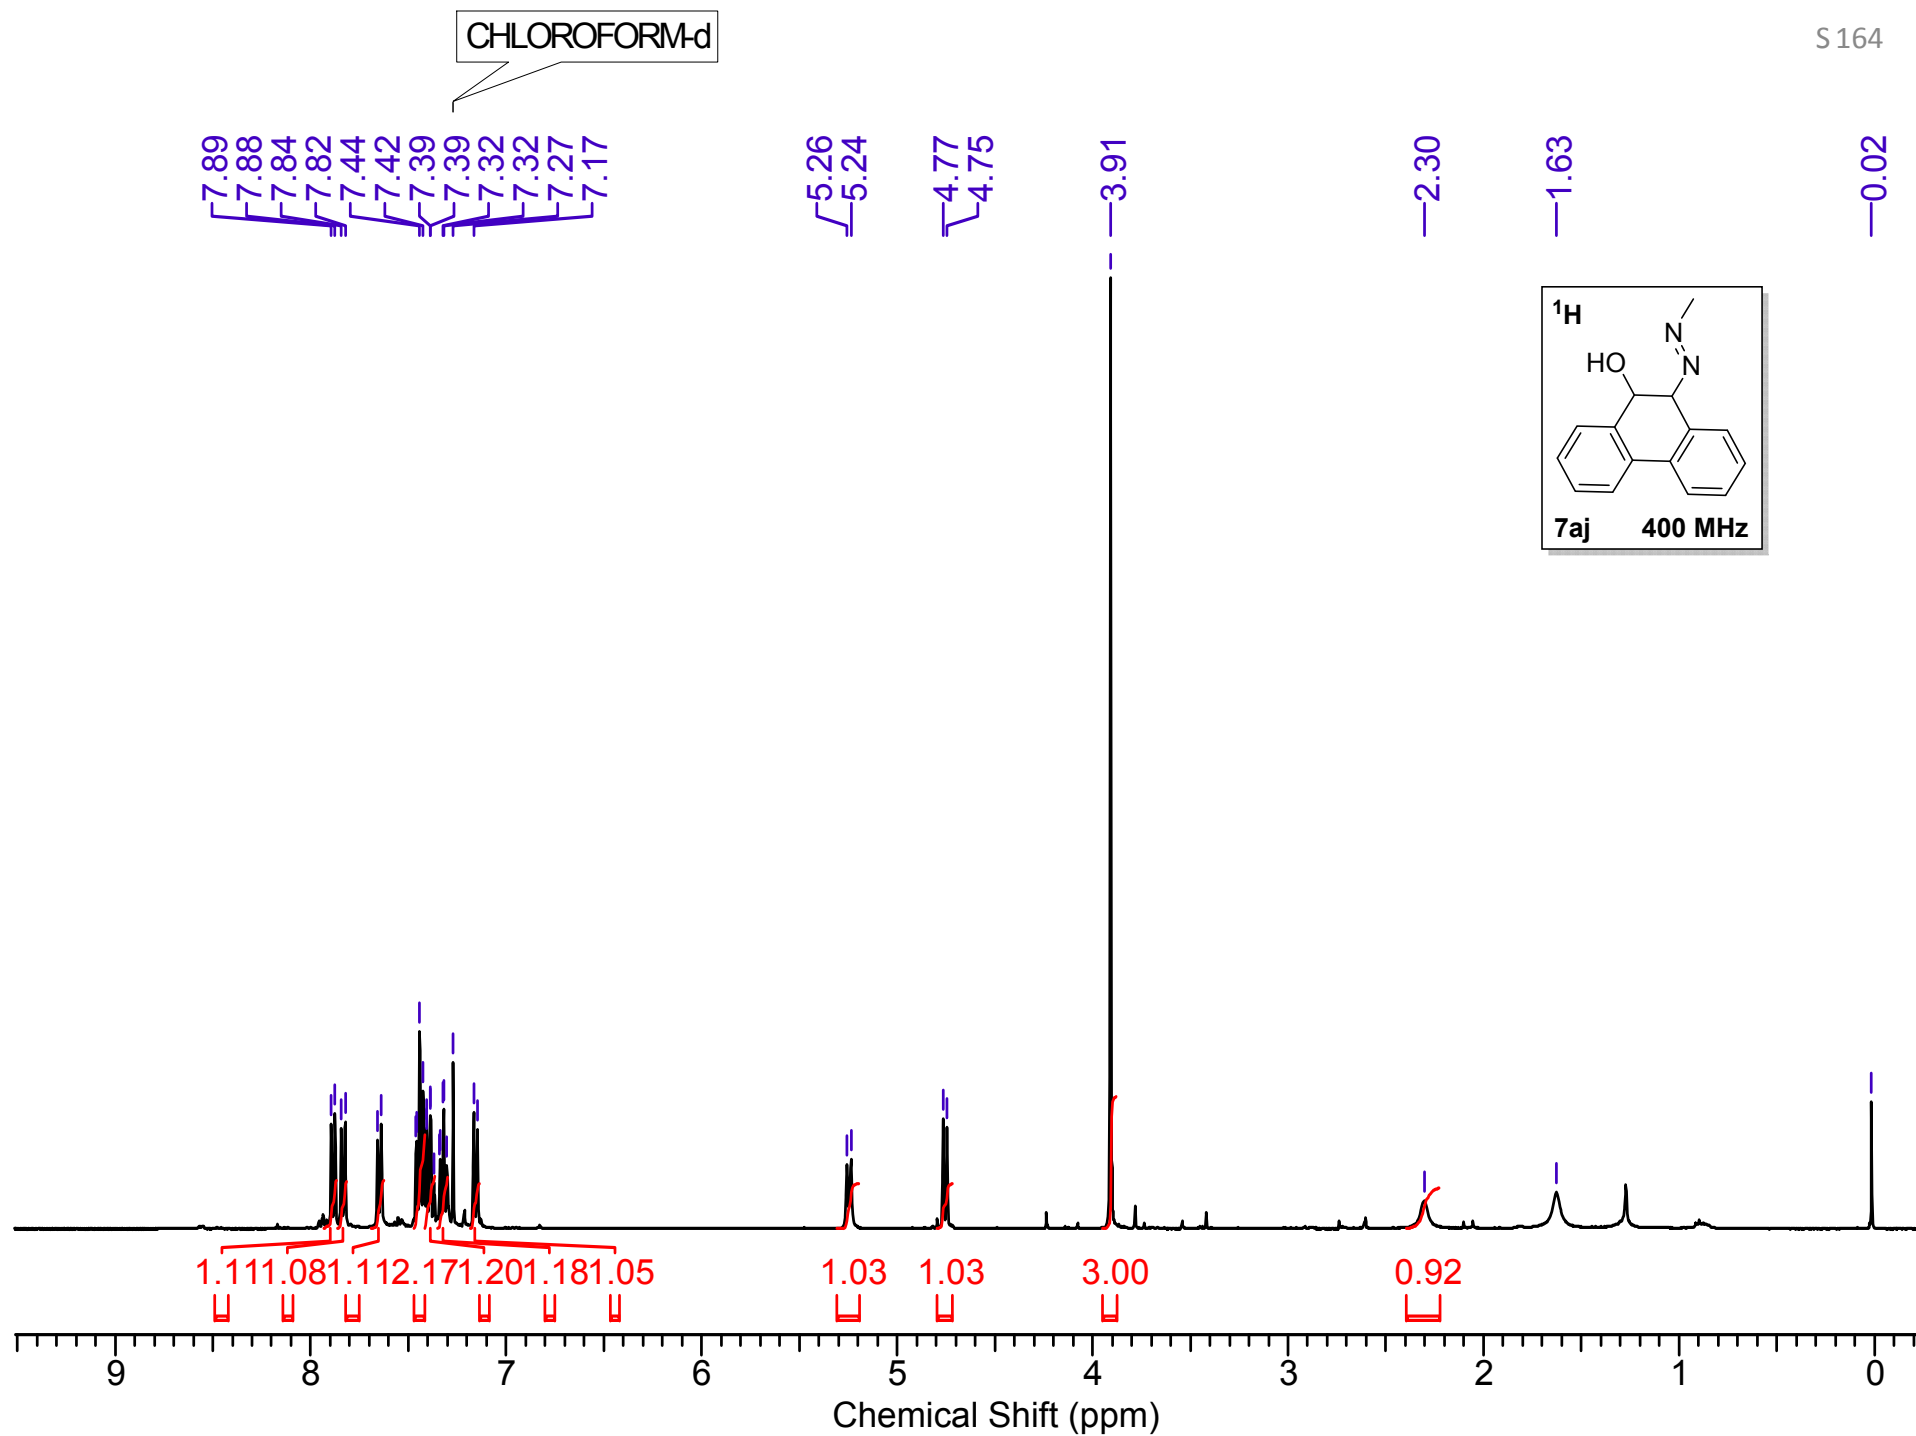

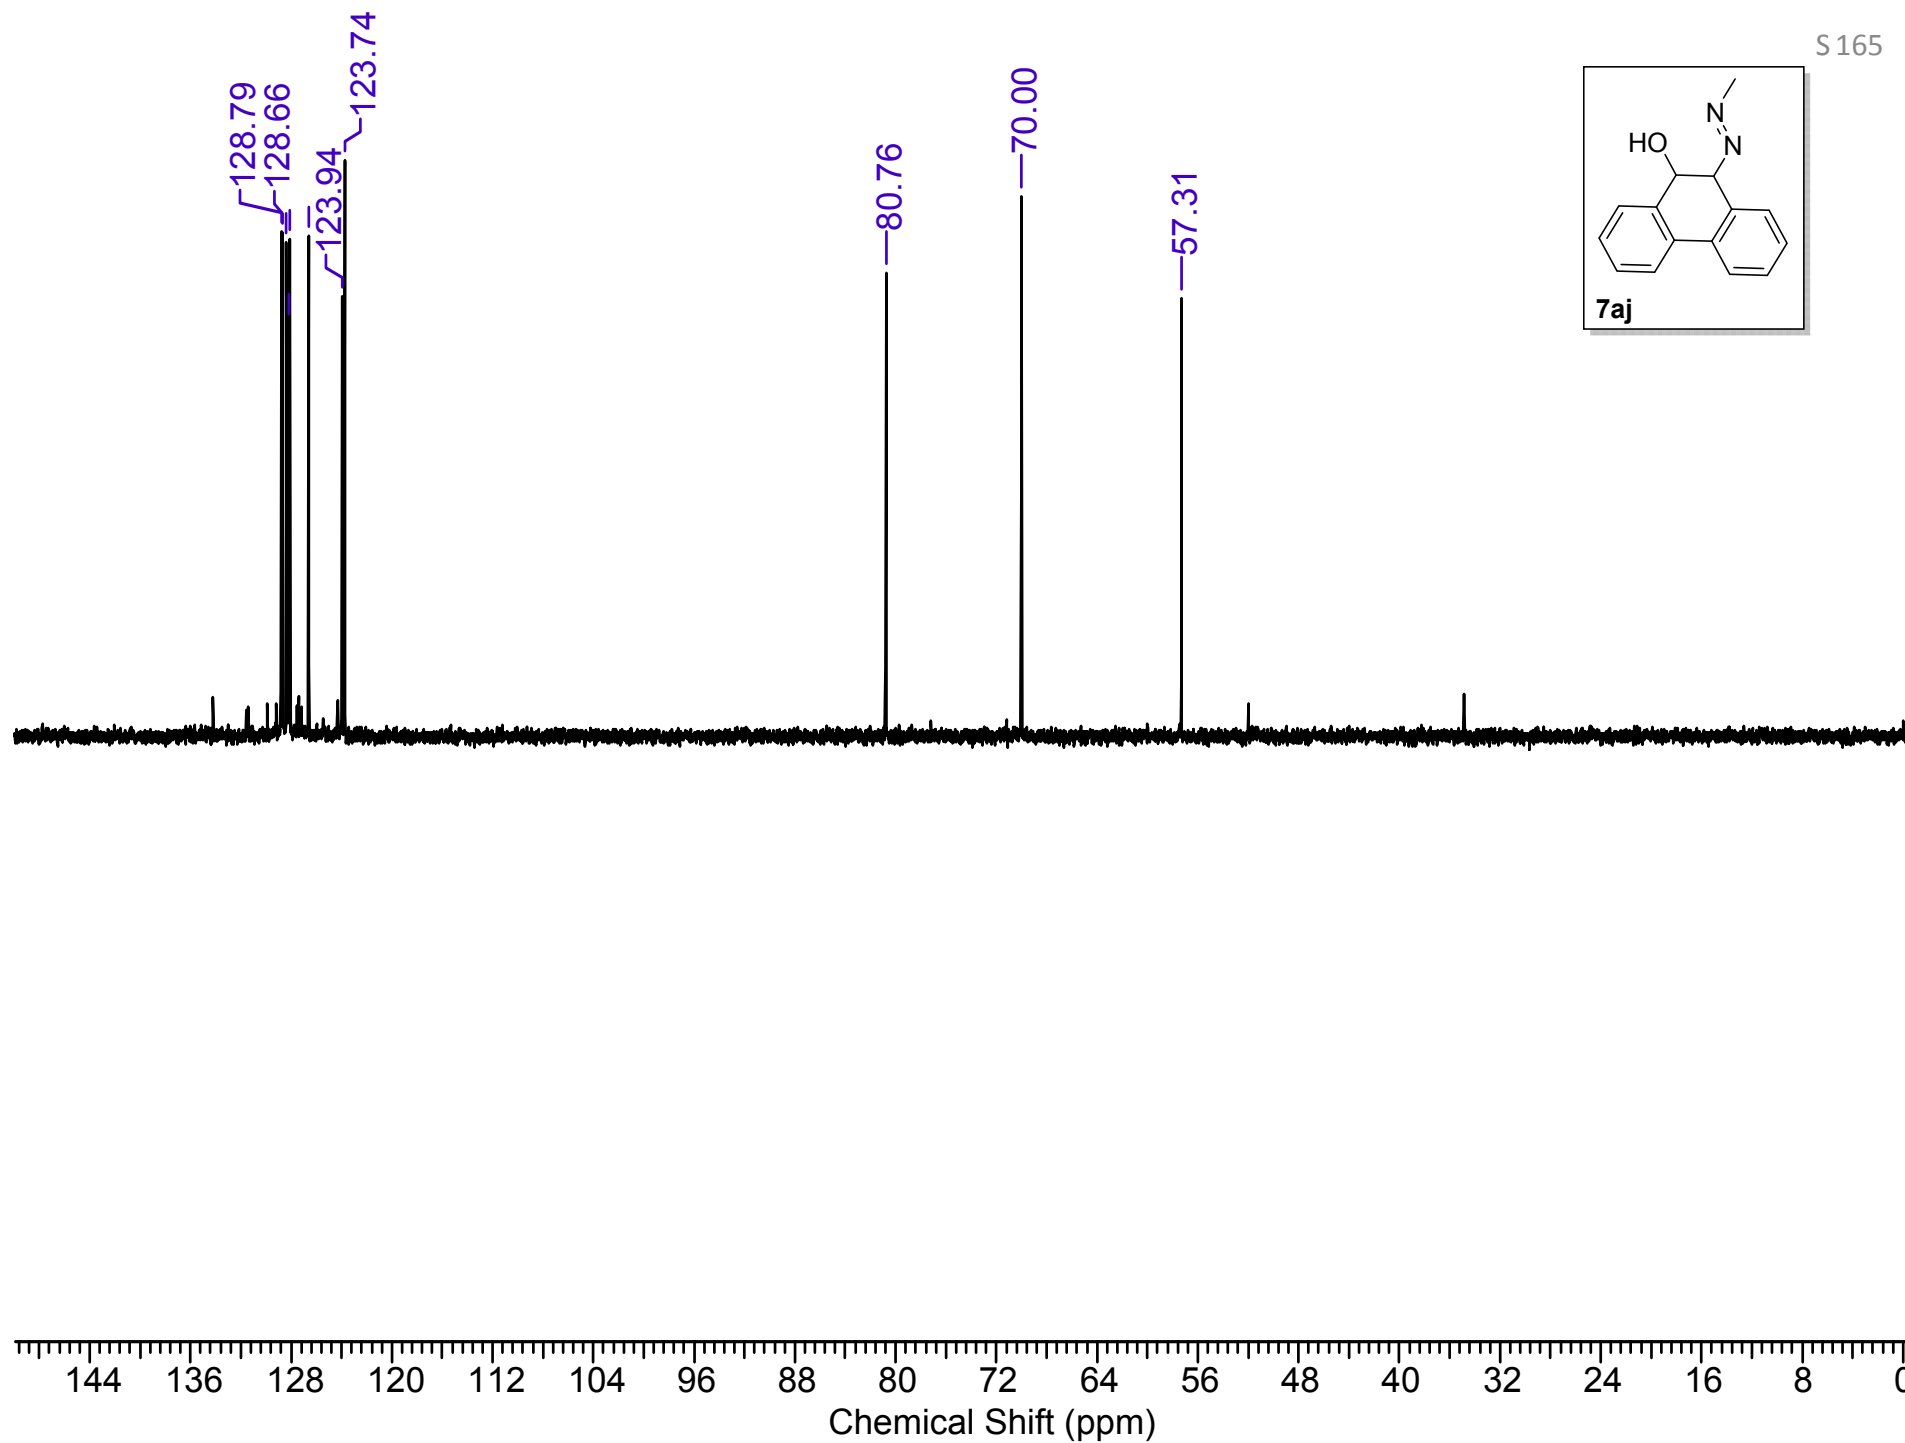

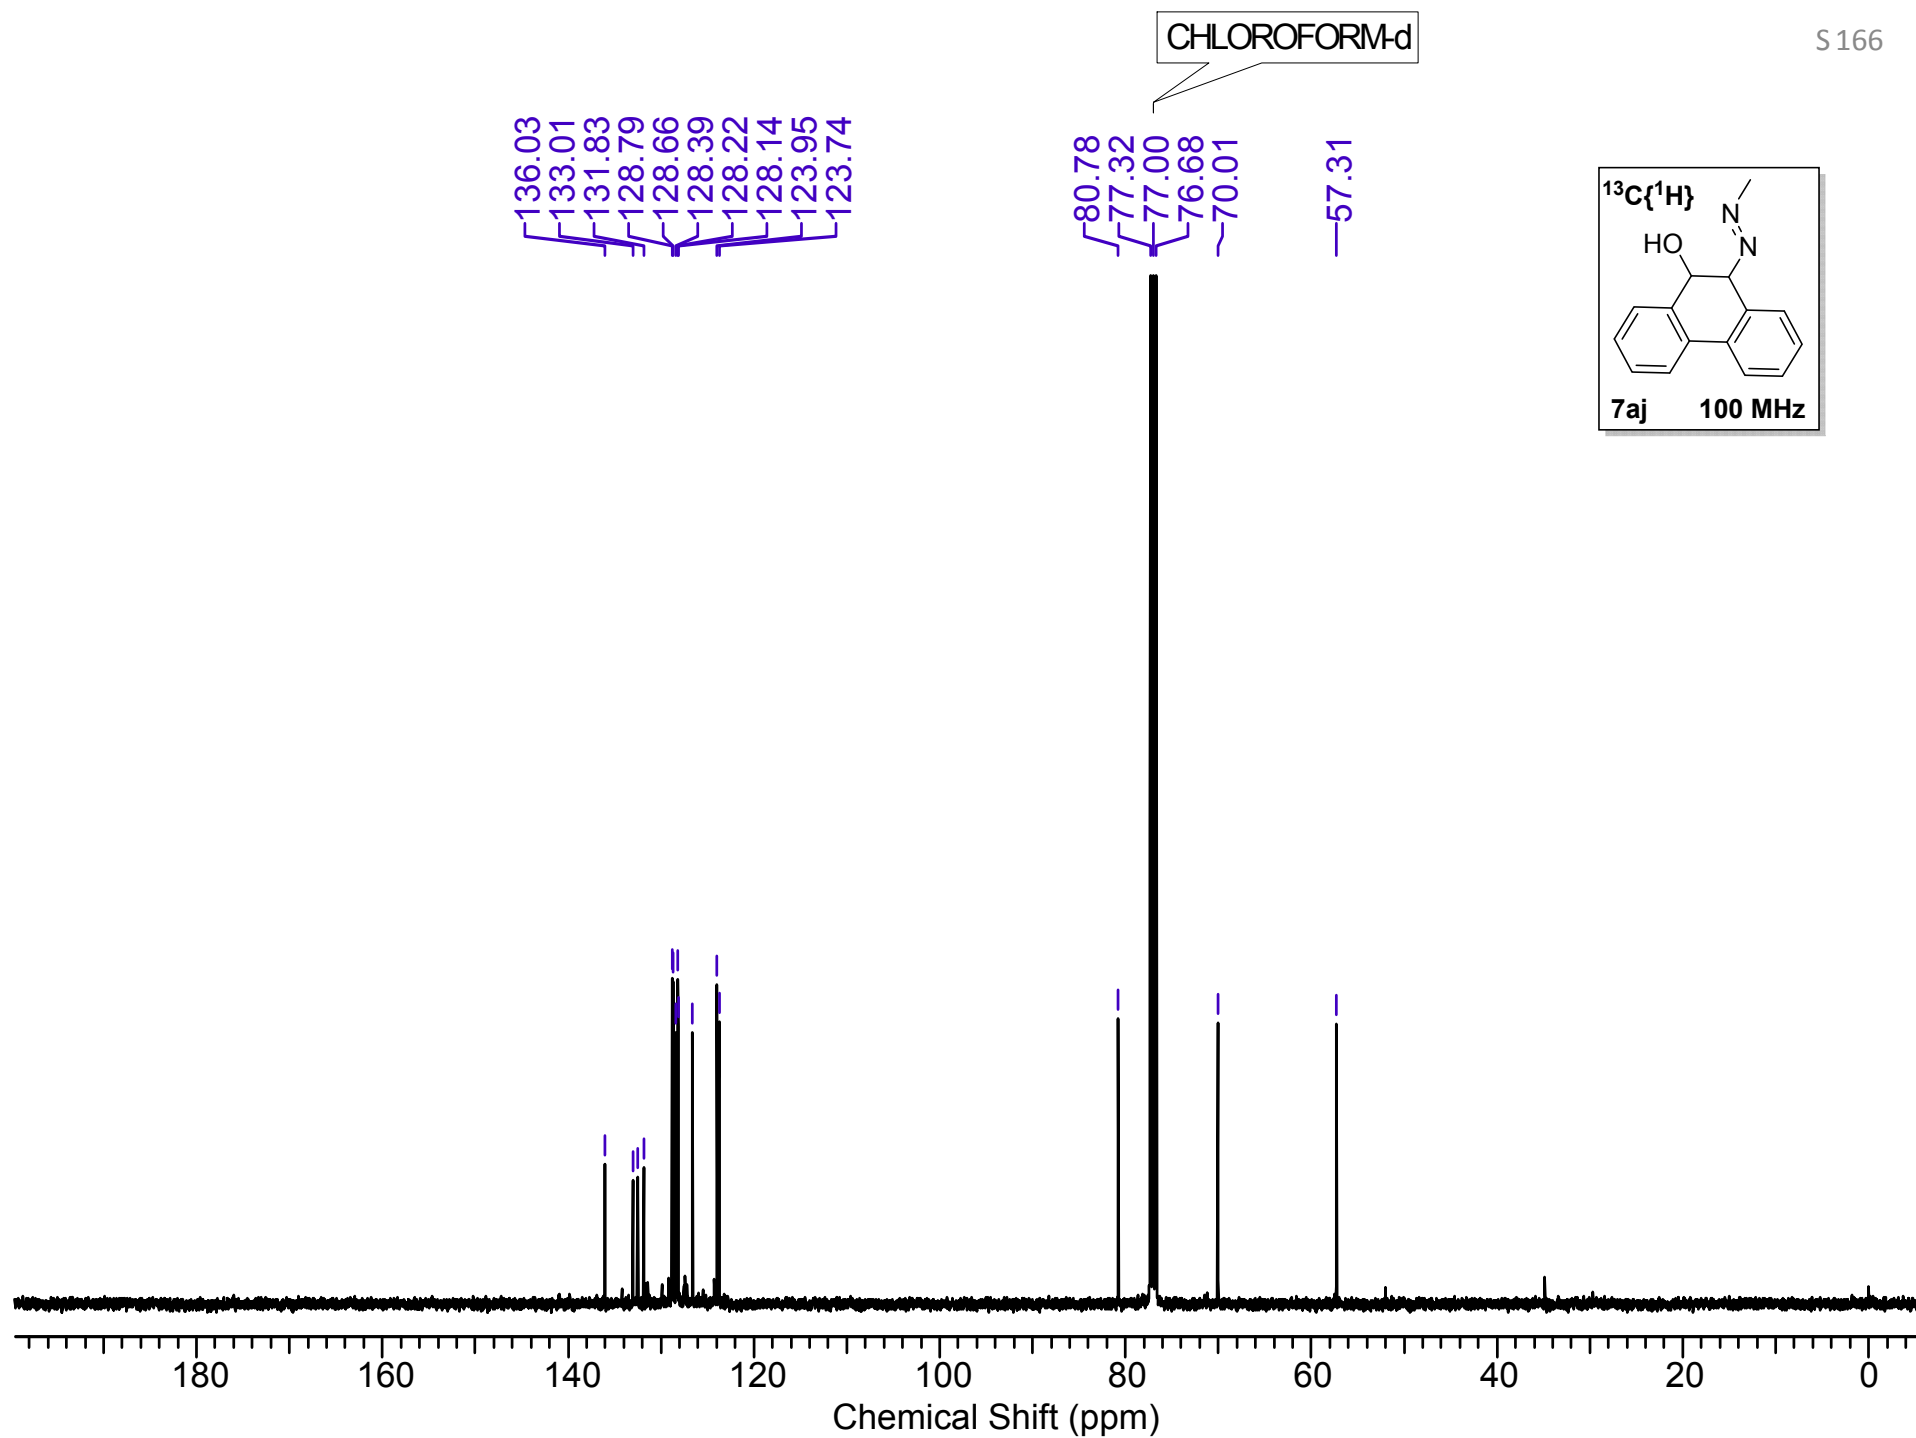

Y 943 Ph

IISER PUNE

1: TOF MS ES+  
4.88e3Y 943 Ph 87 (1.599) AM2 (Ar,20000.0,556.28,0.00,LS 3); Sm (SG,  
300.00)CALCULATED MASS  
(M+H)<sup>+</sup> 239.1184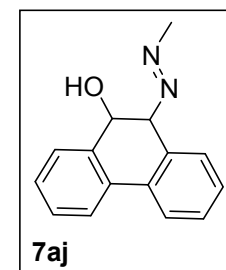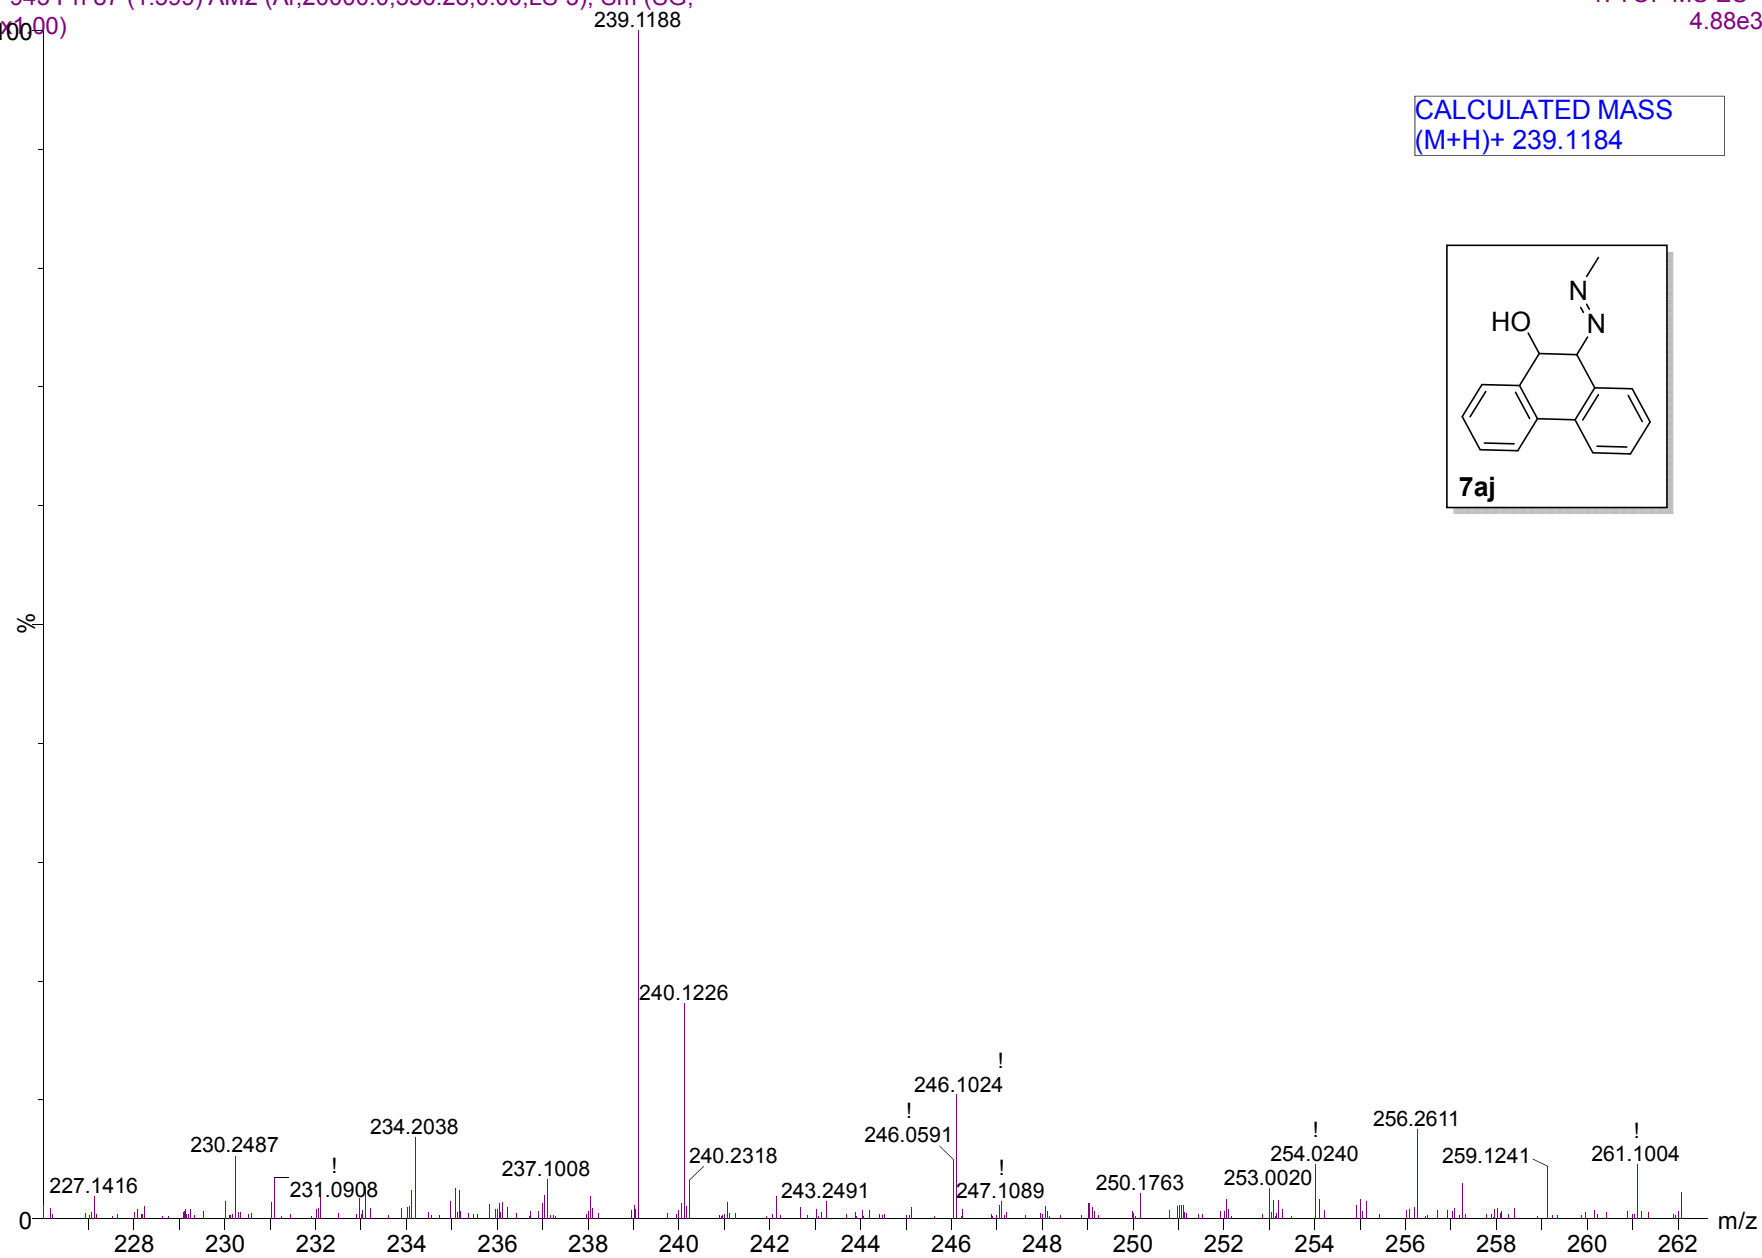

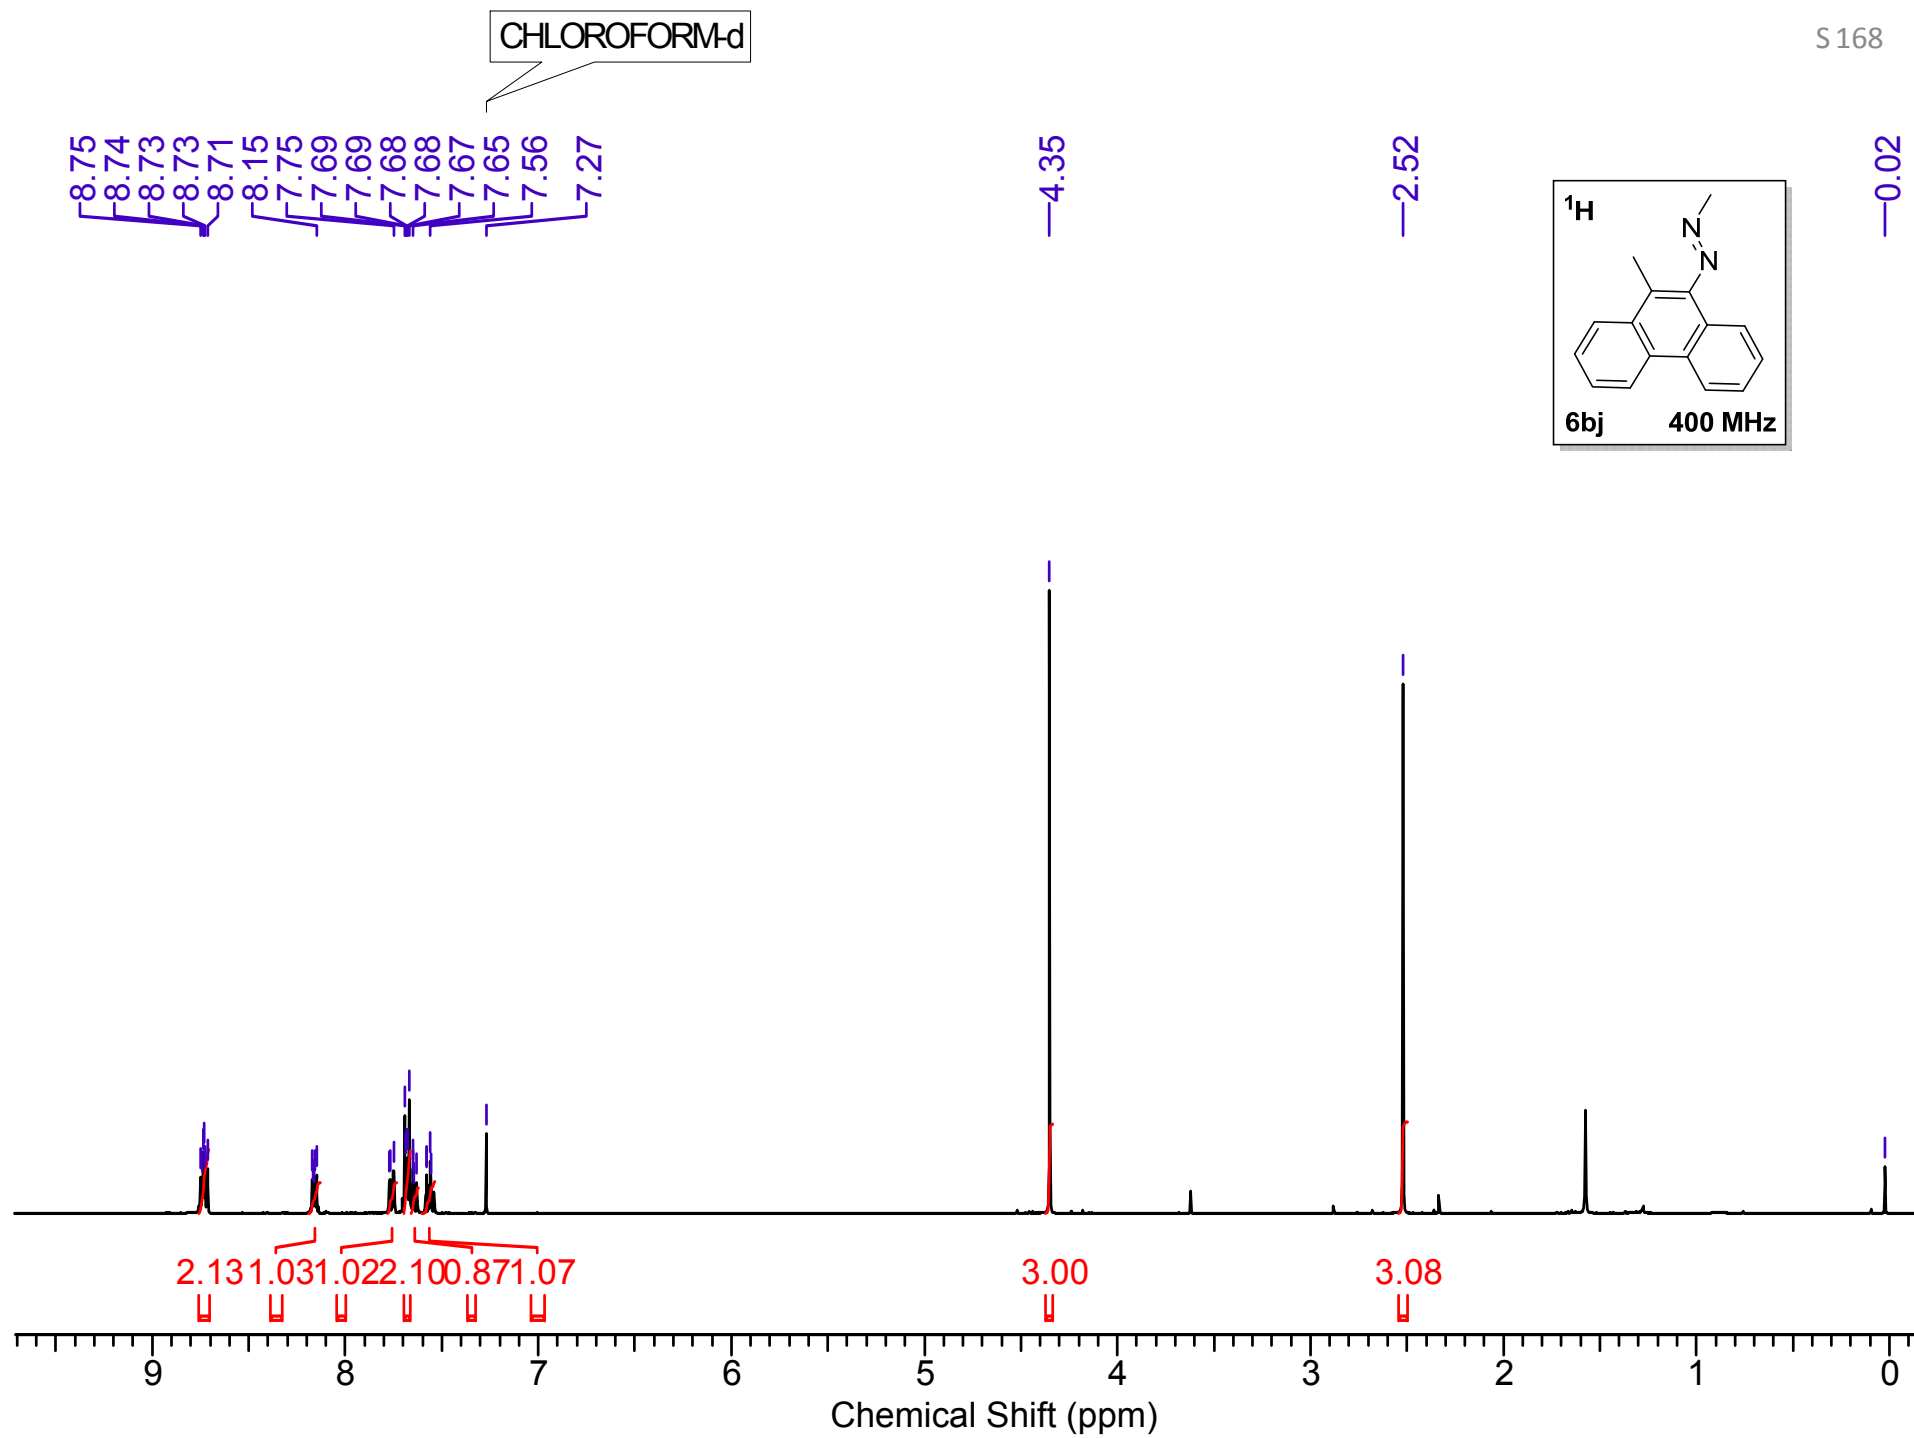



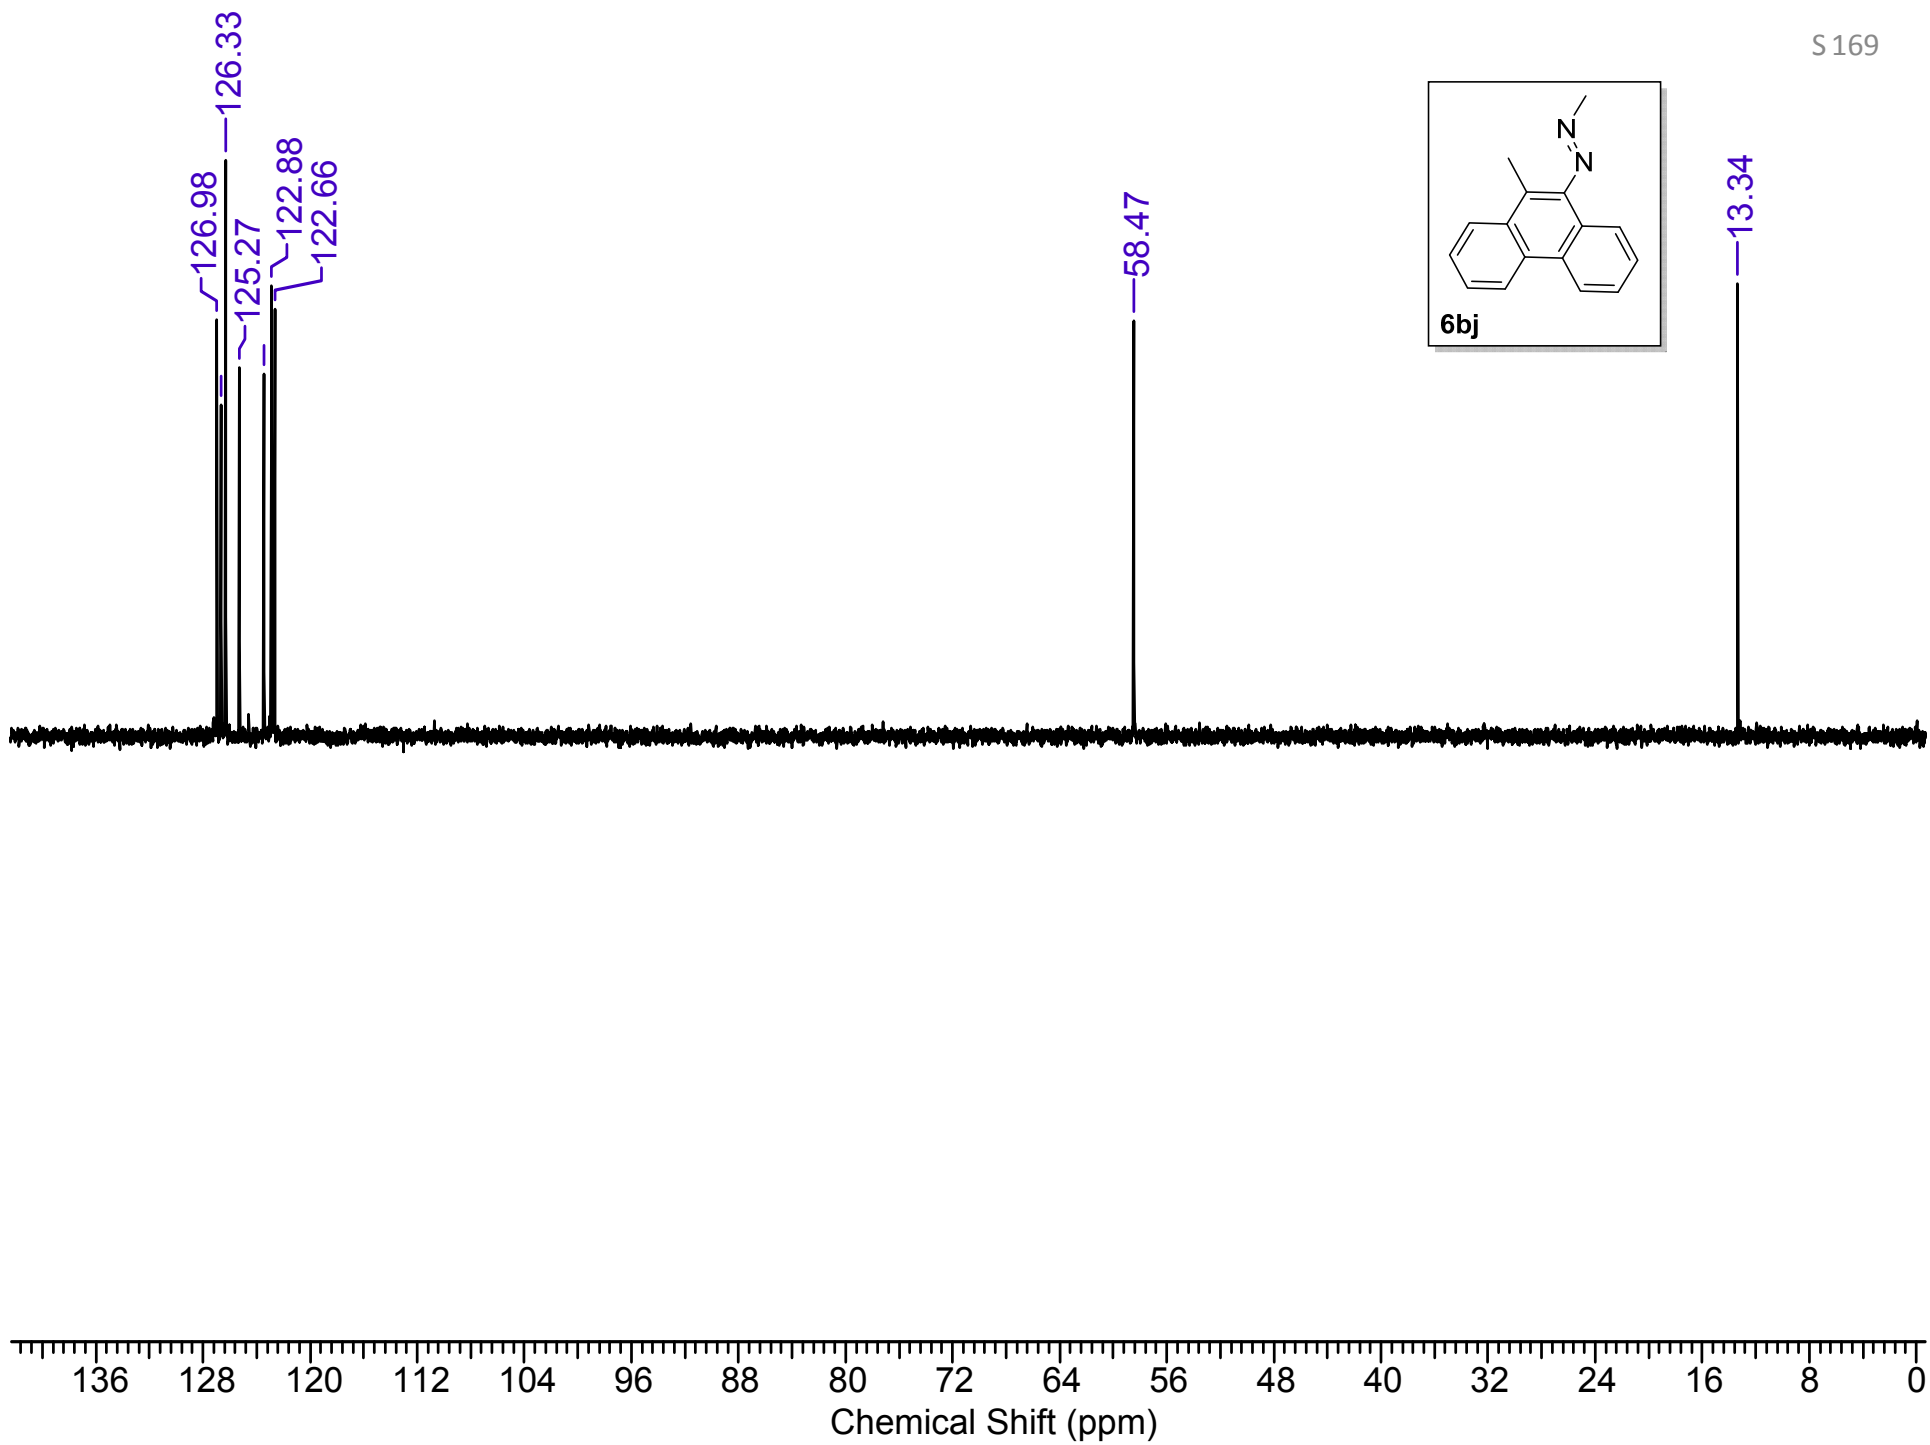

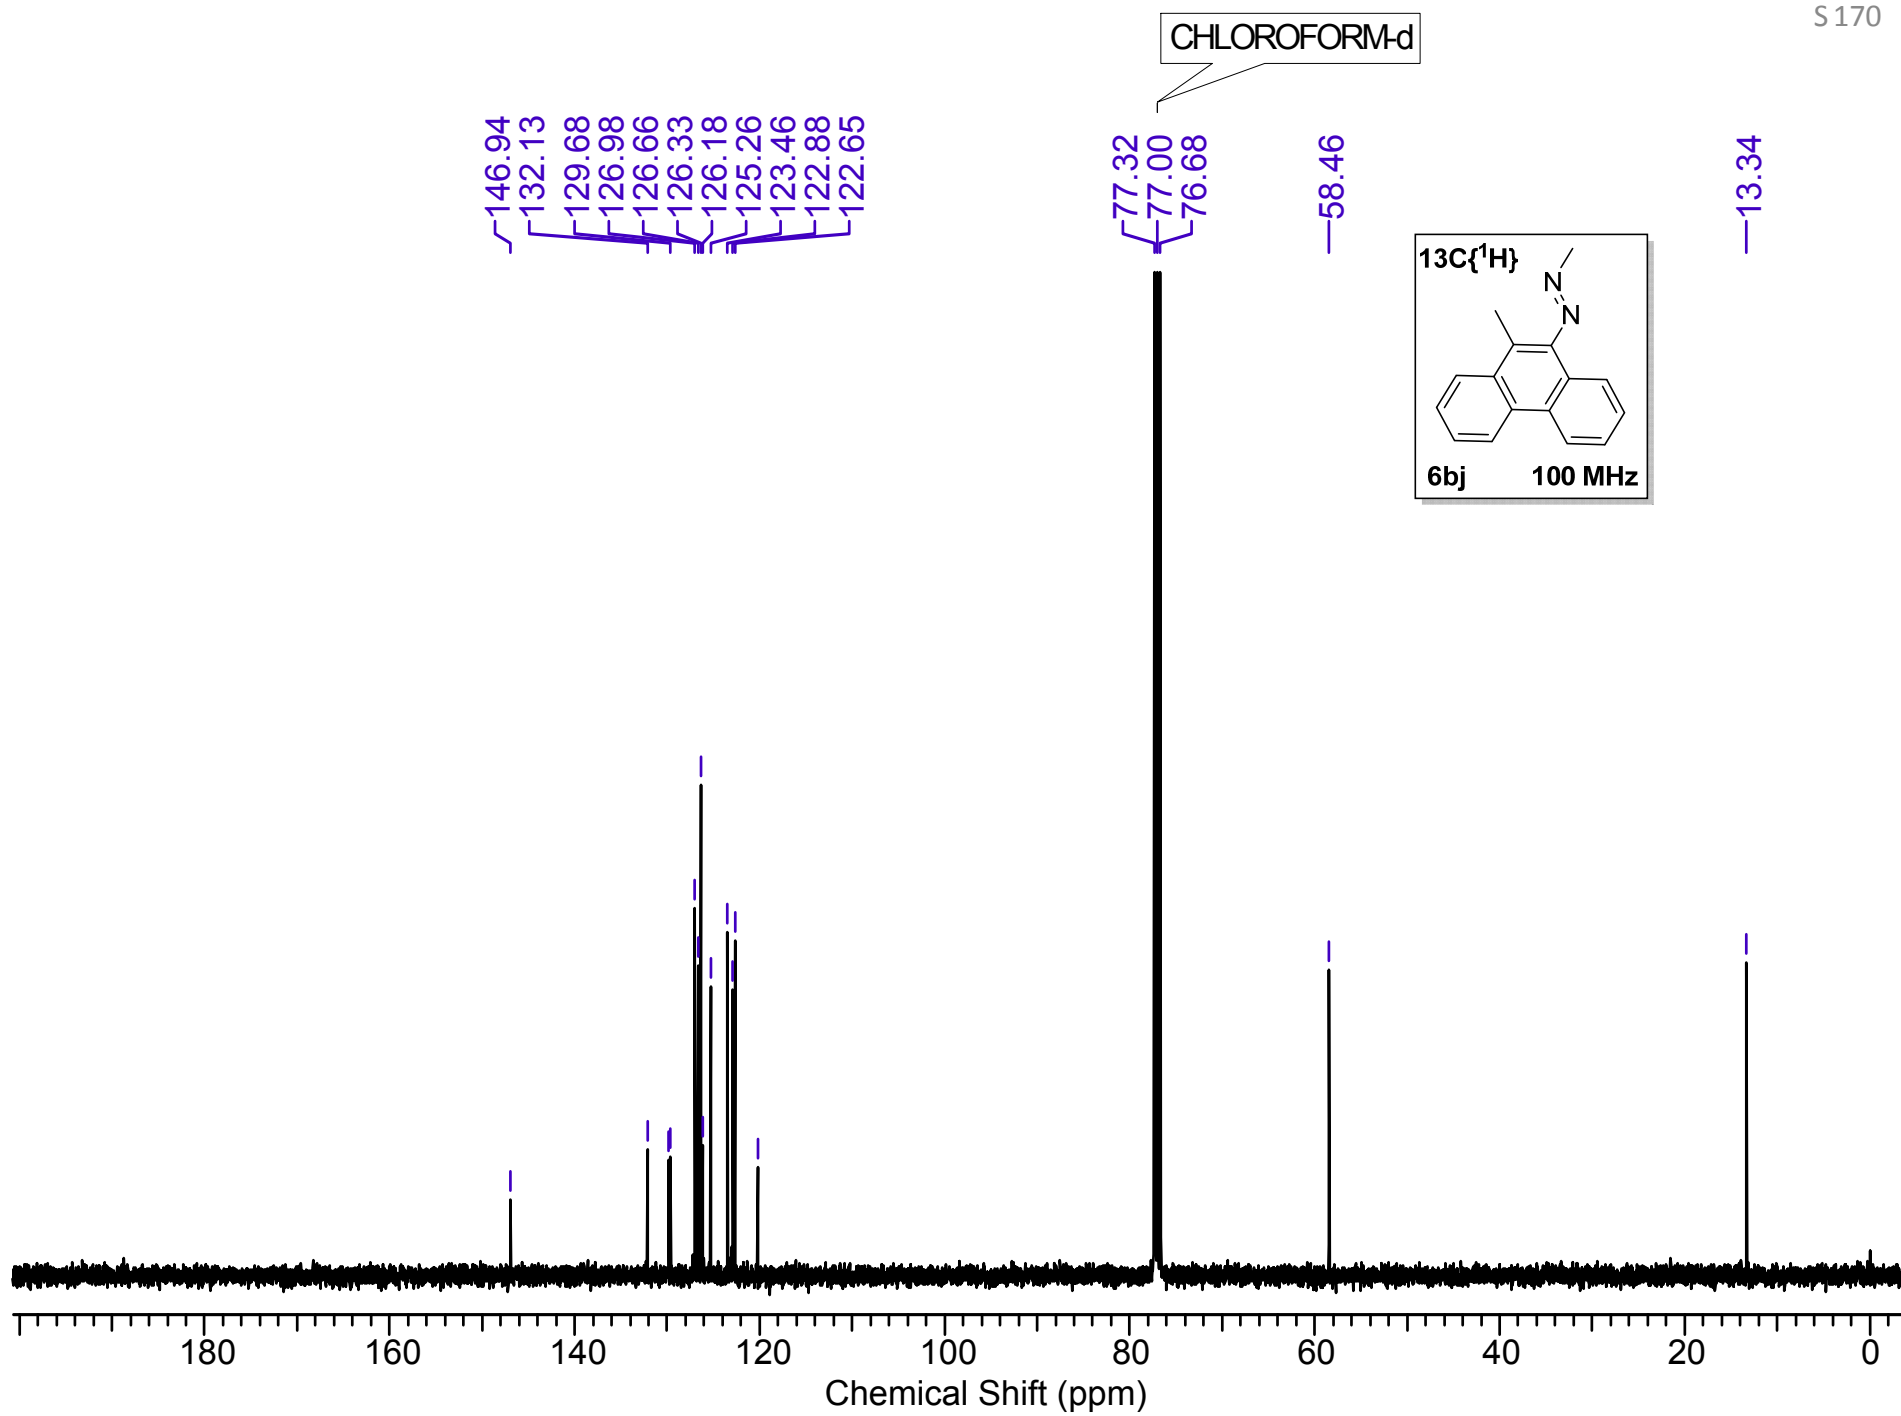

Y 942

IISER PUNE

1: TOF MS ES+  
4.34e4Y 942 122 (2.236) AM2 (Ar,20000.0,556.28,0.00,LS 3); Sm (SG,  
300.00)CALCULATED MASS  
(M+H)+ 235.1235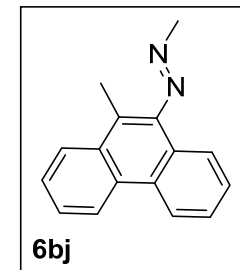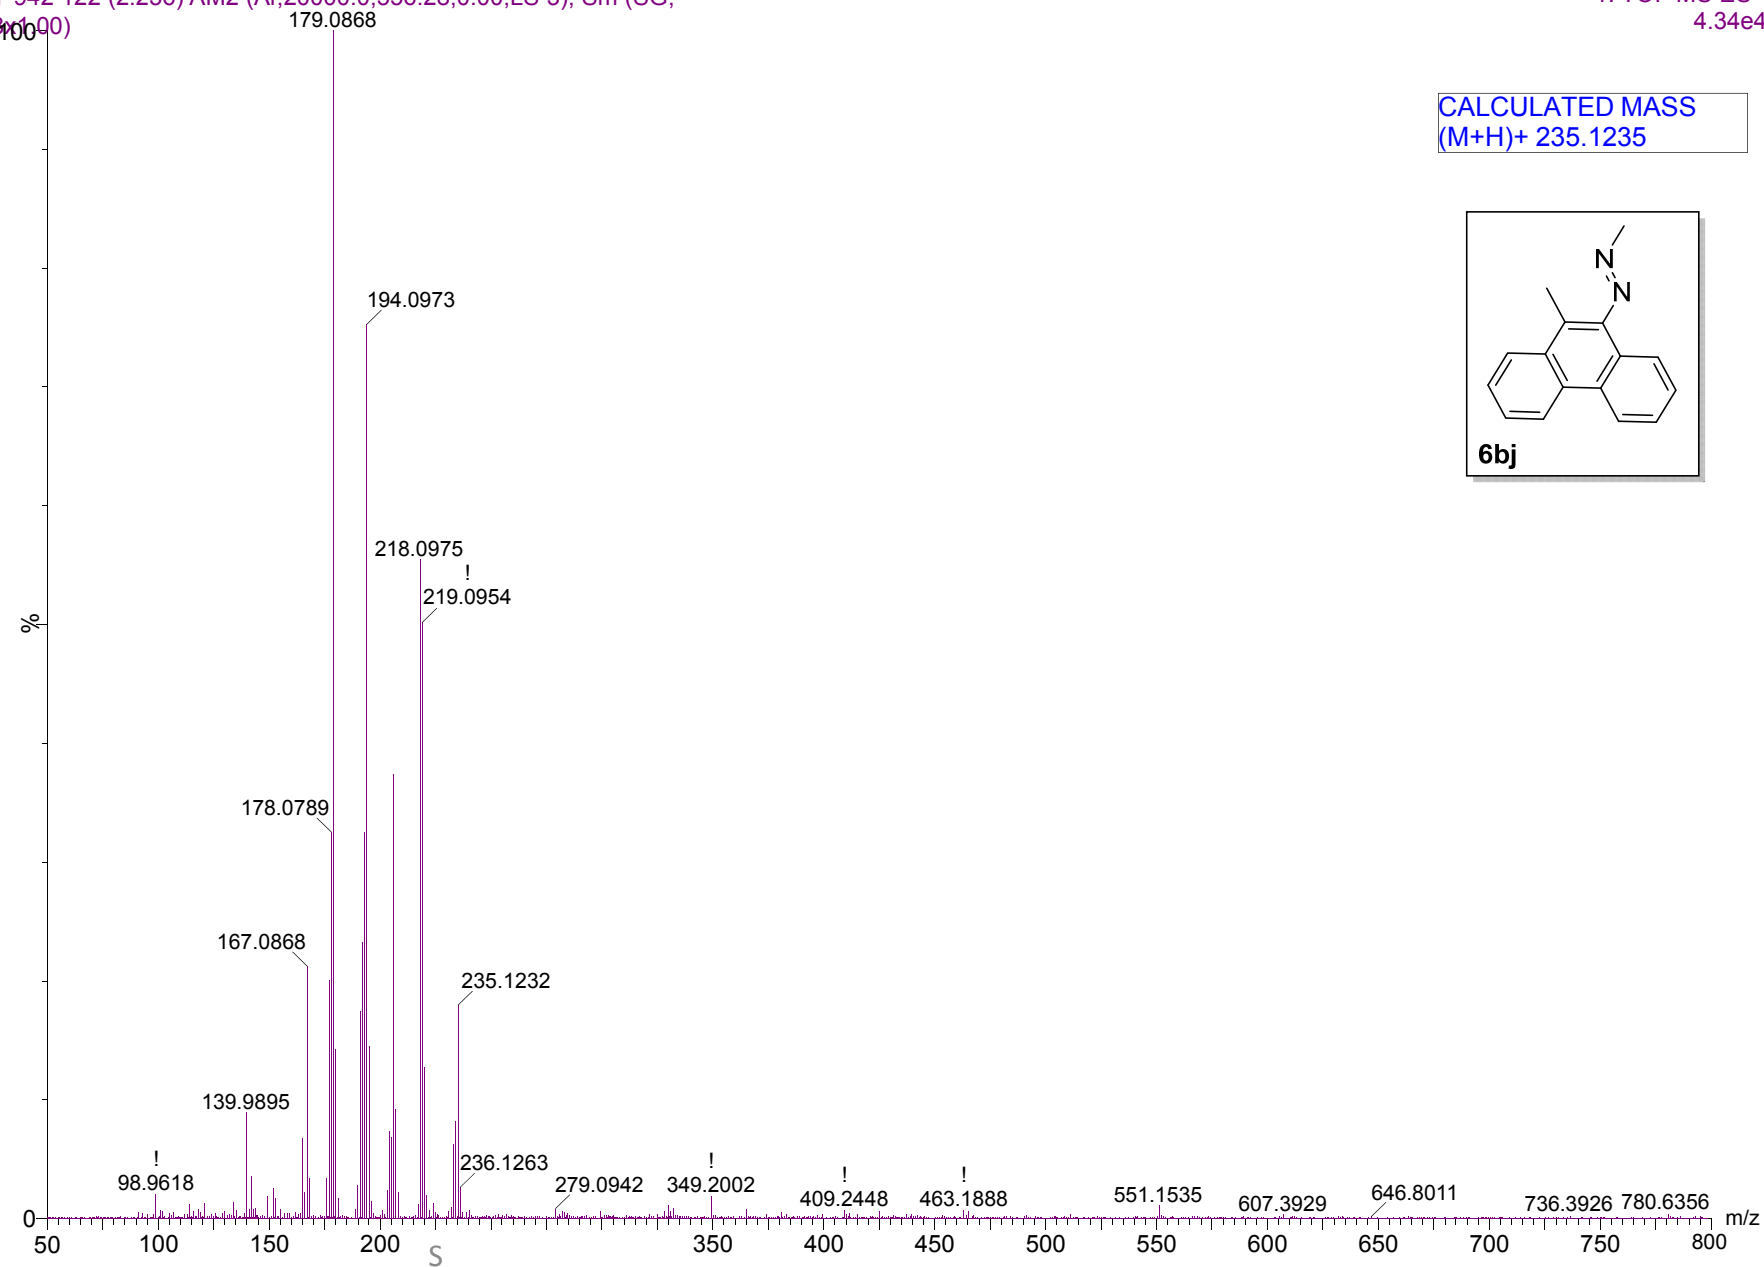

CHLOROFORM-d

8.30  
8.06  
8.04  
7.65  
7.65  
7.63  
7.44  
7.41  
7.41  
7.40  
7.39  
7.39  
7.27

—3.16

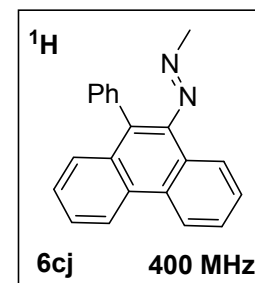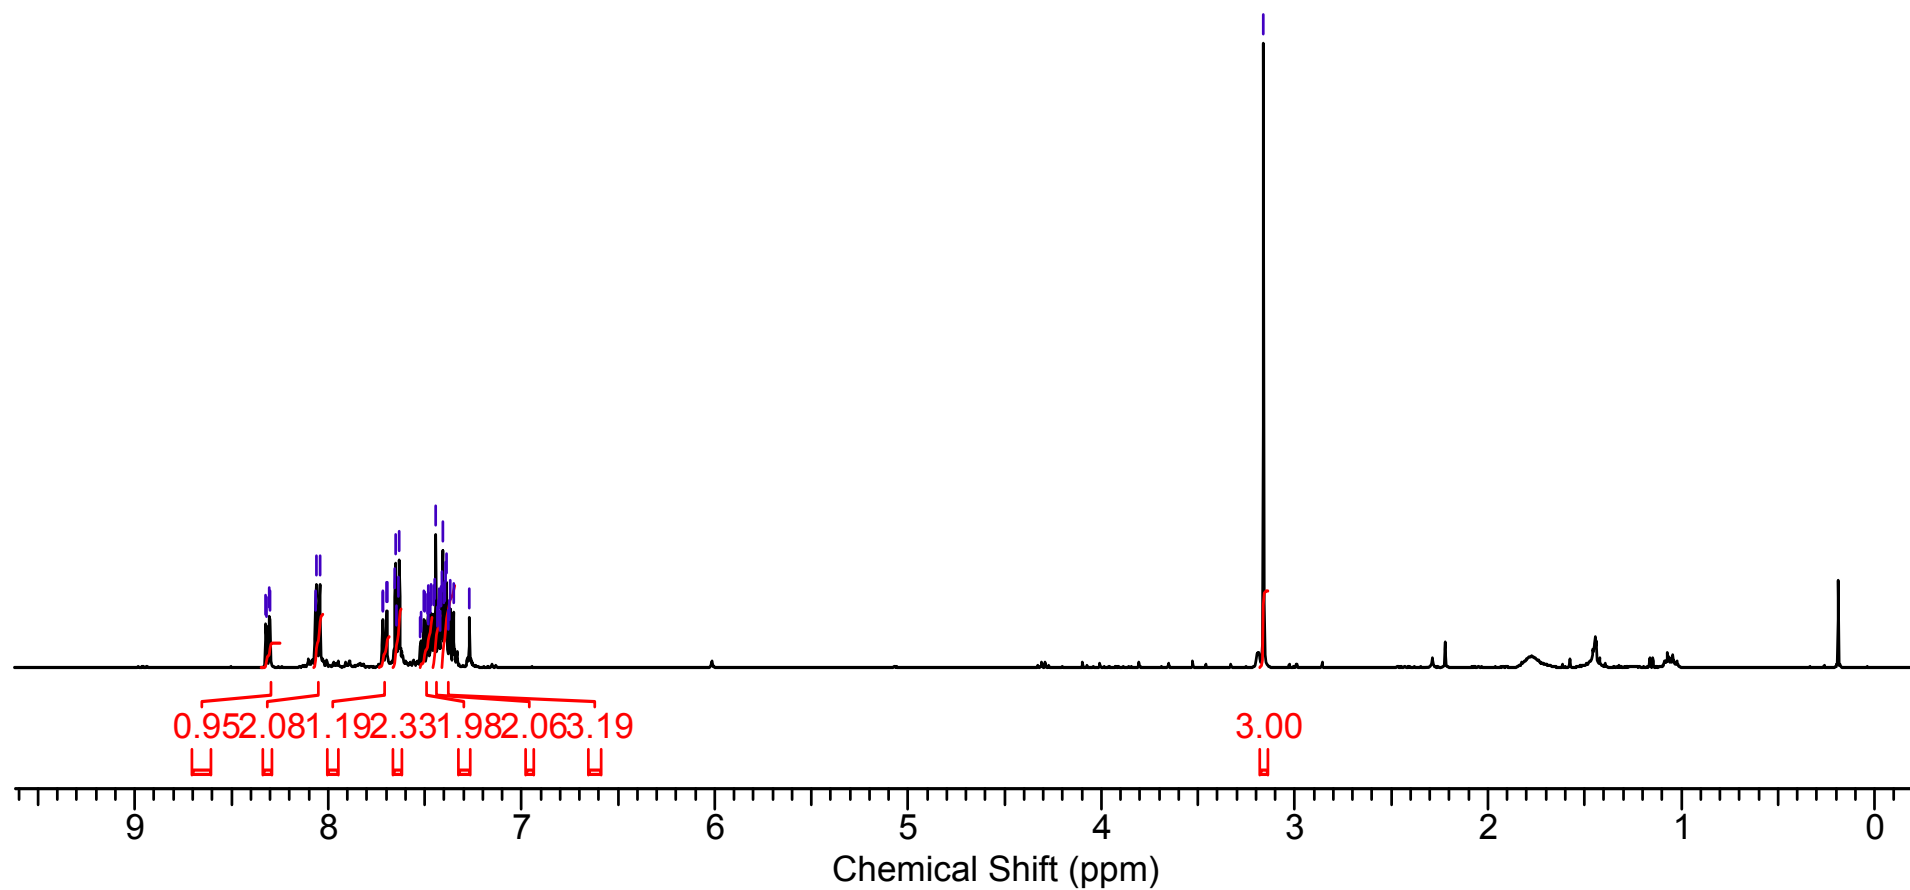

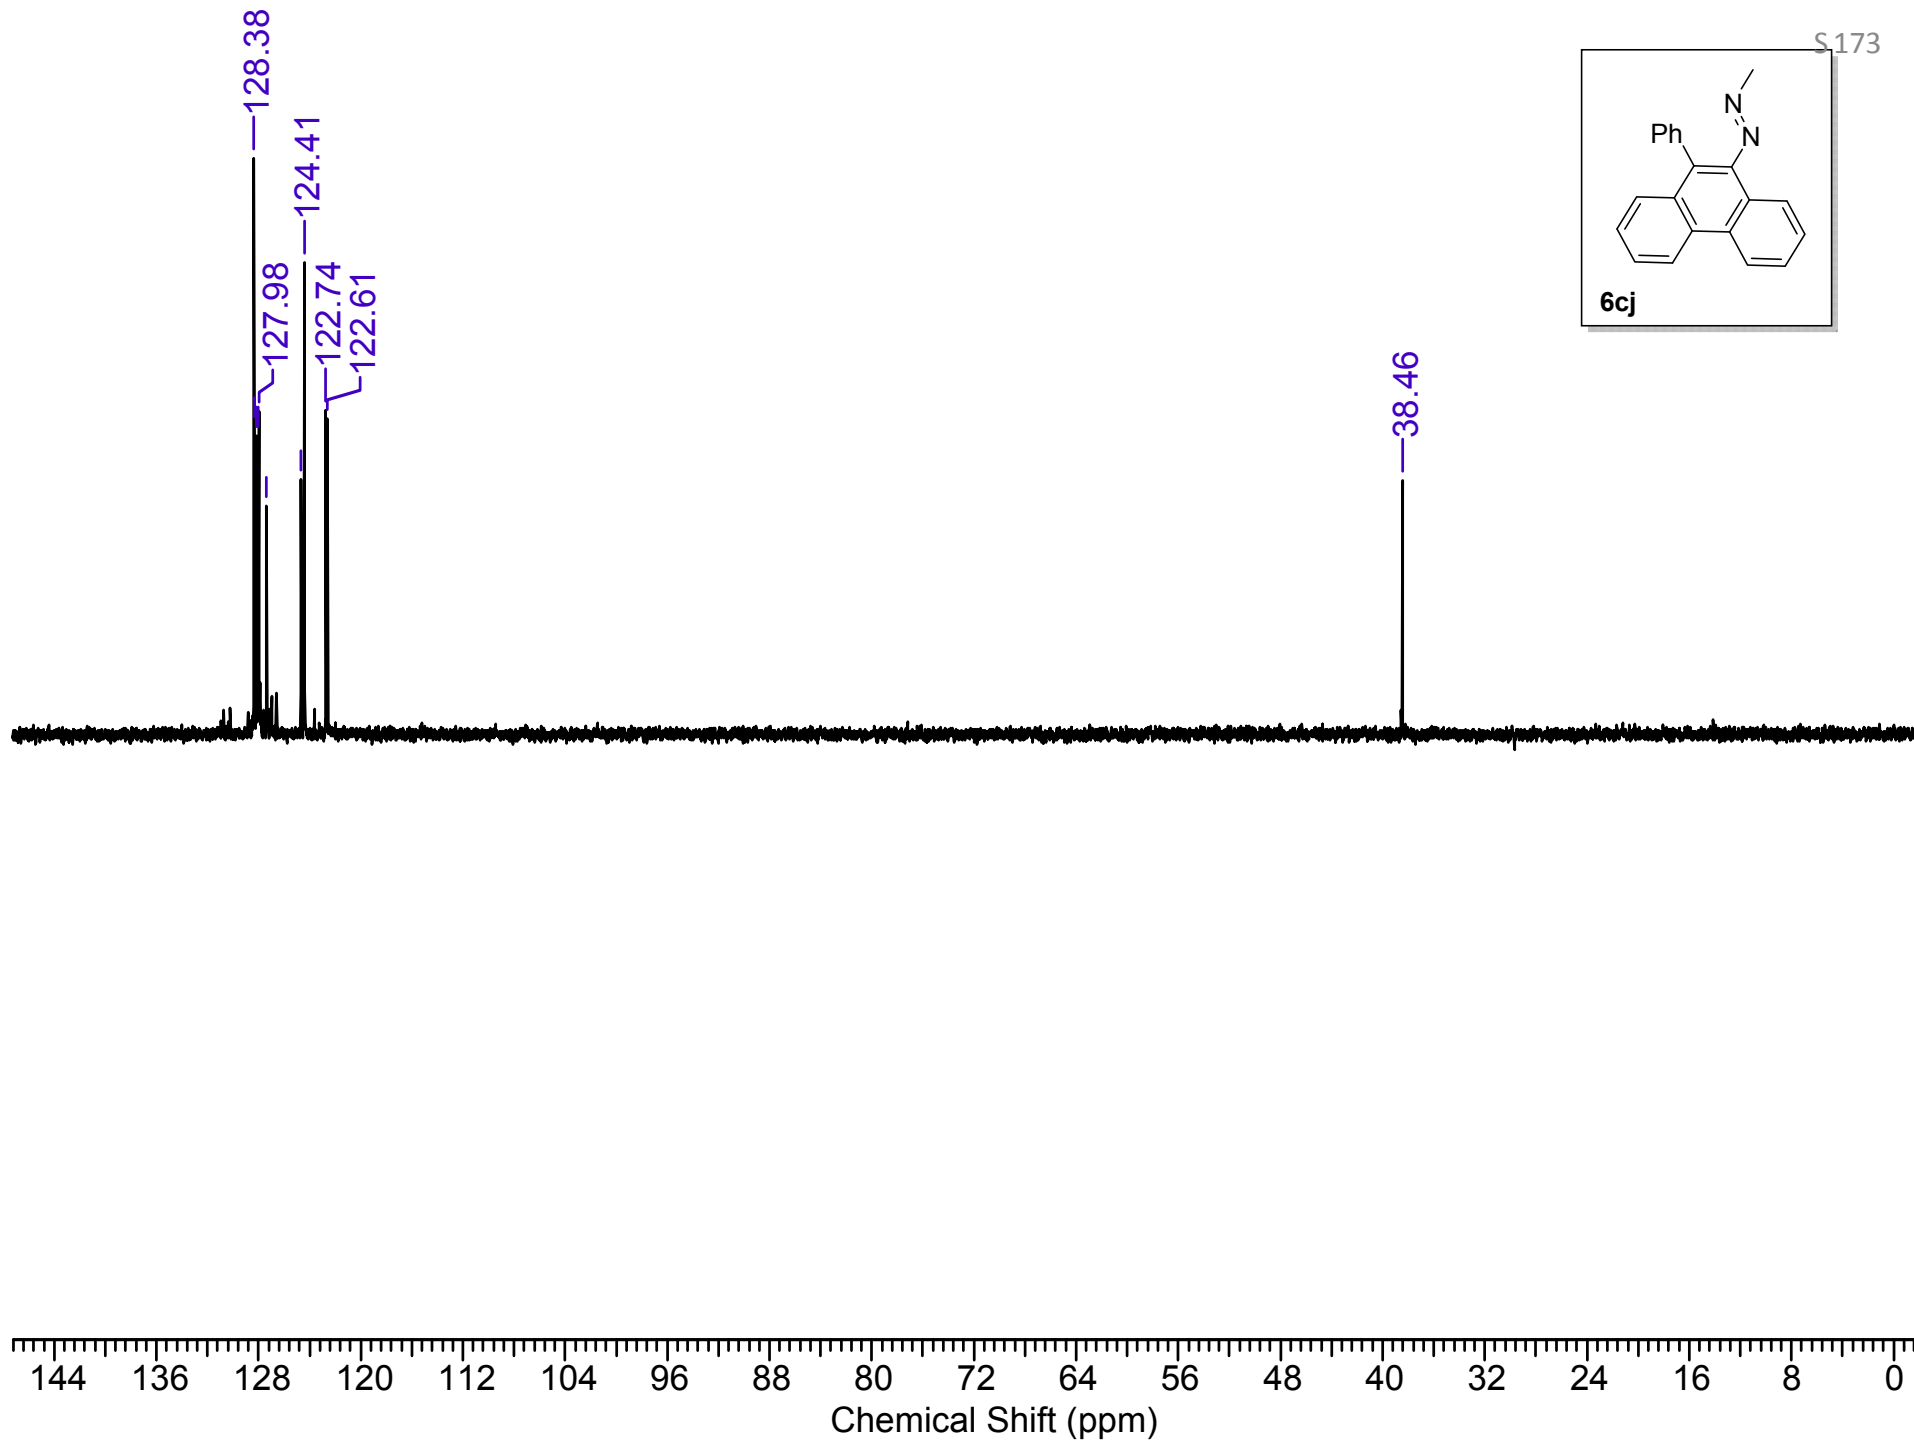

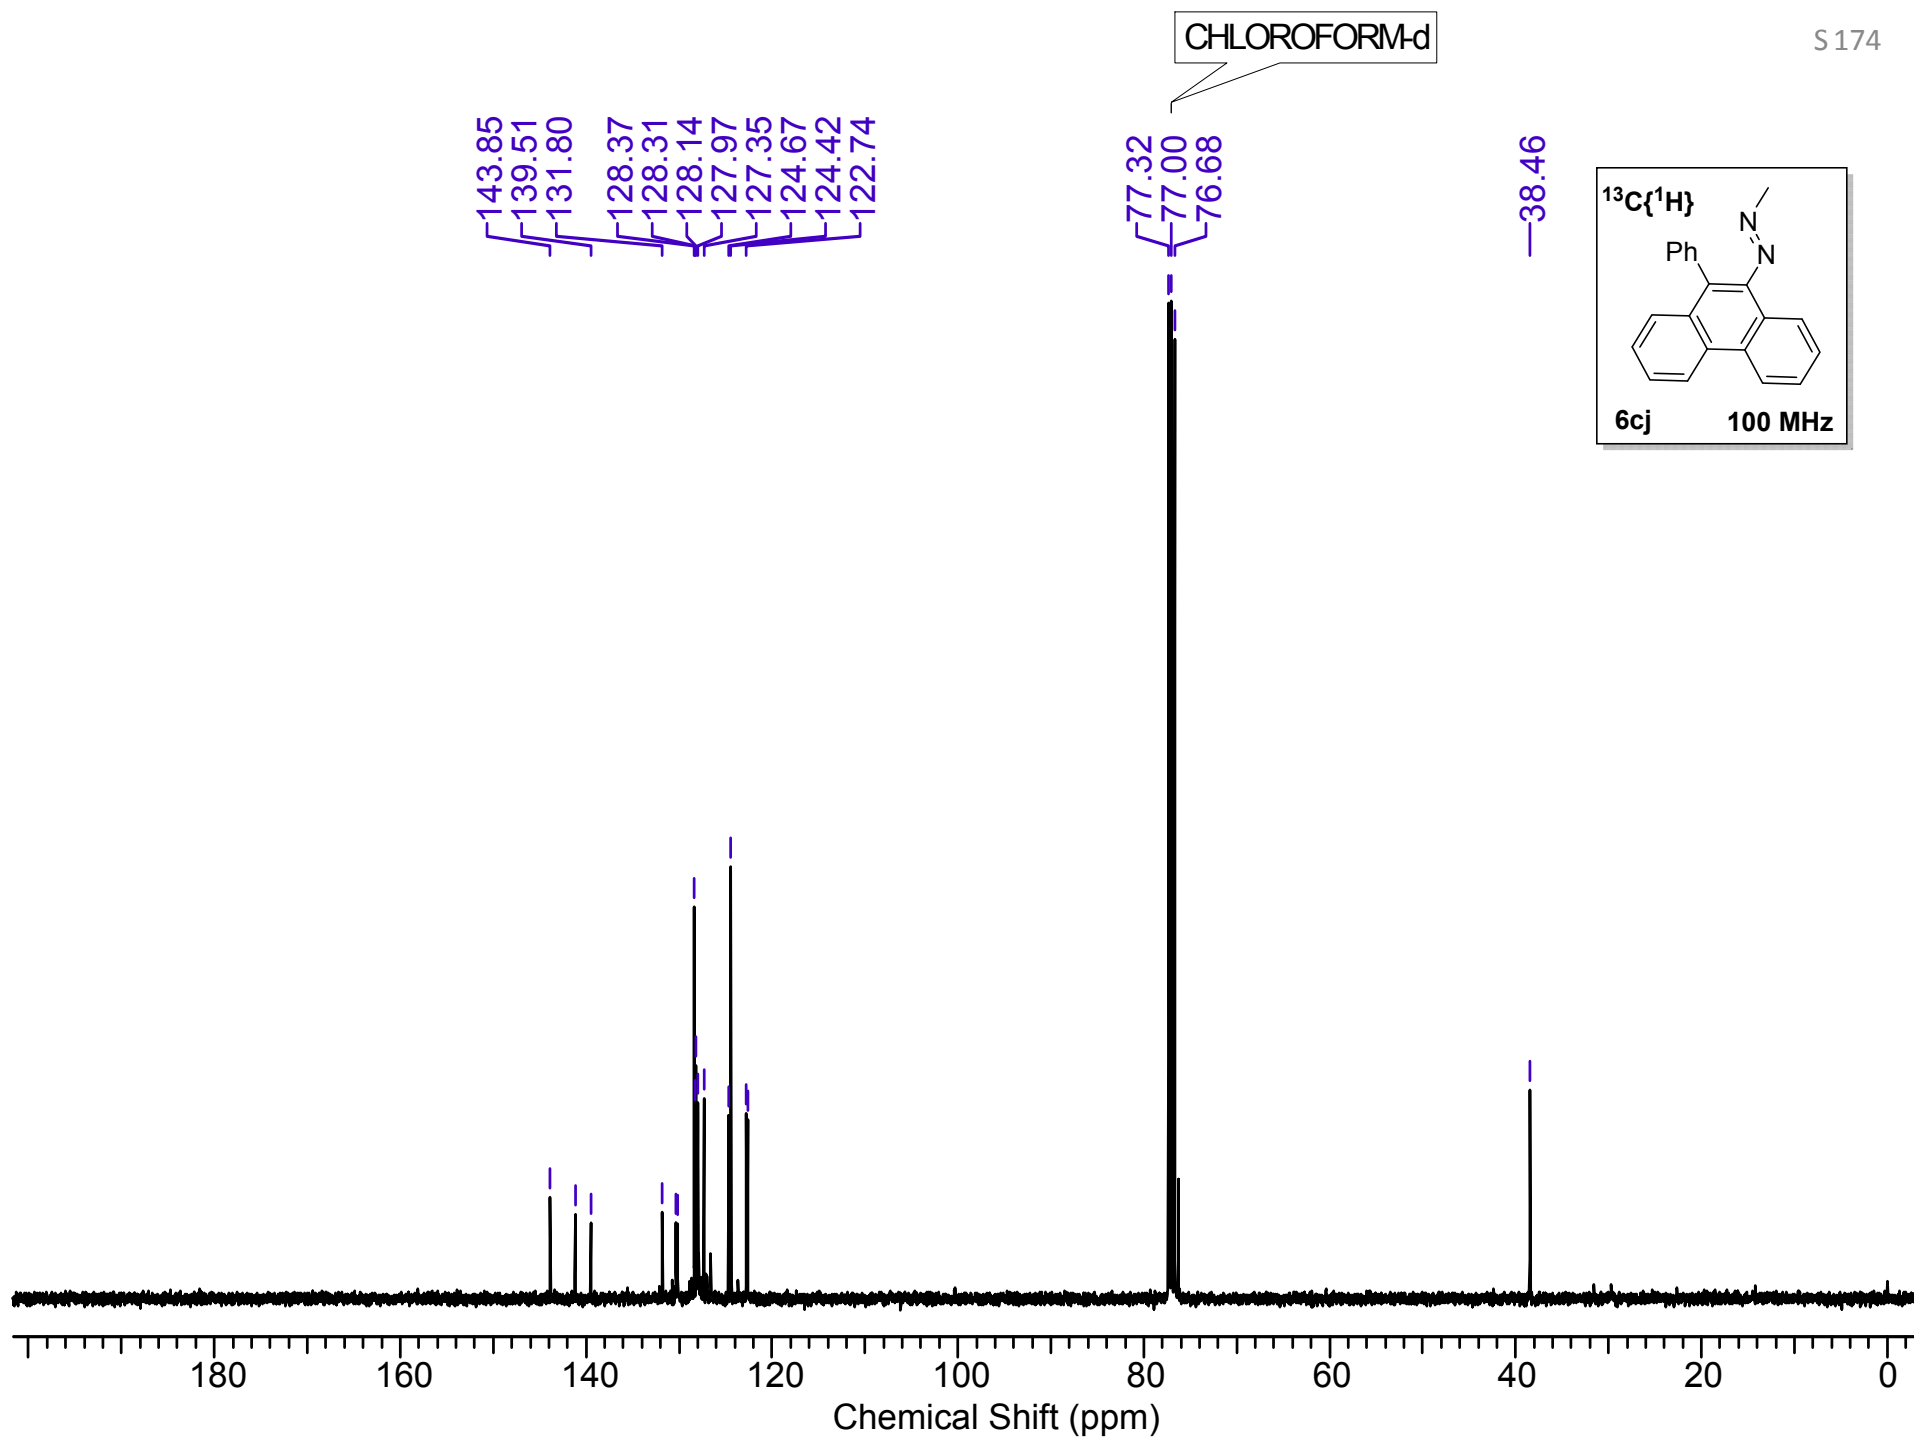

Y 944

Y 944 123 (2.253) AM2 (Ar,20000.0,556.28,0.00,LS 3); Sm (SG,  
30000)

IISER PUNE

1: TOF MS ES+  
9.13e4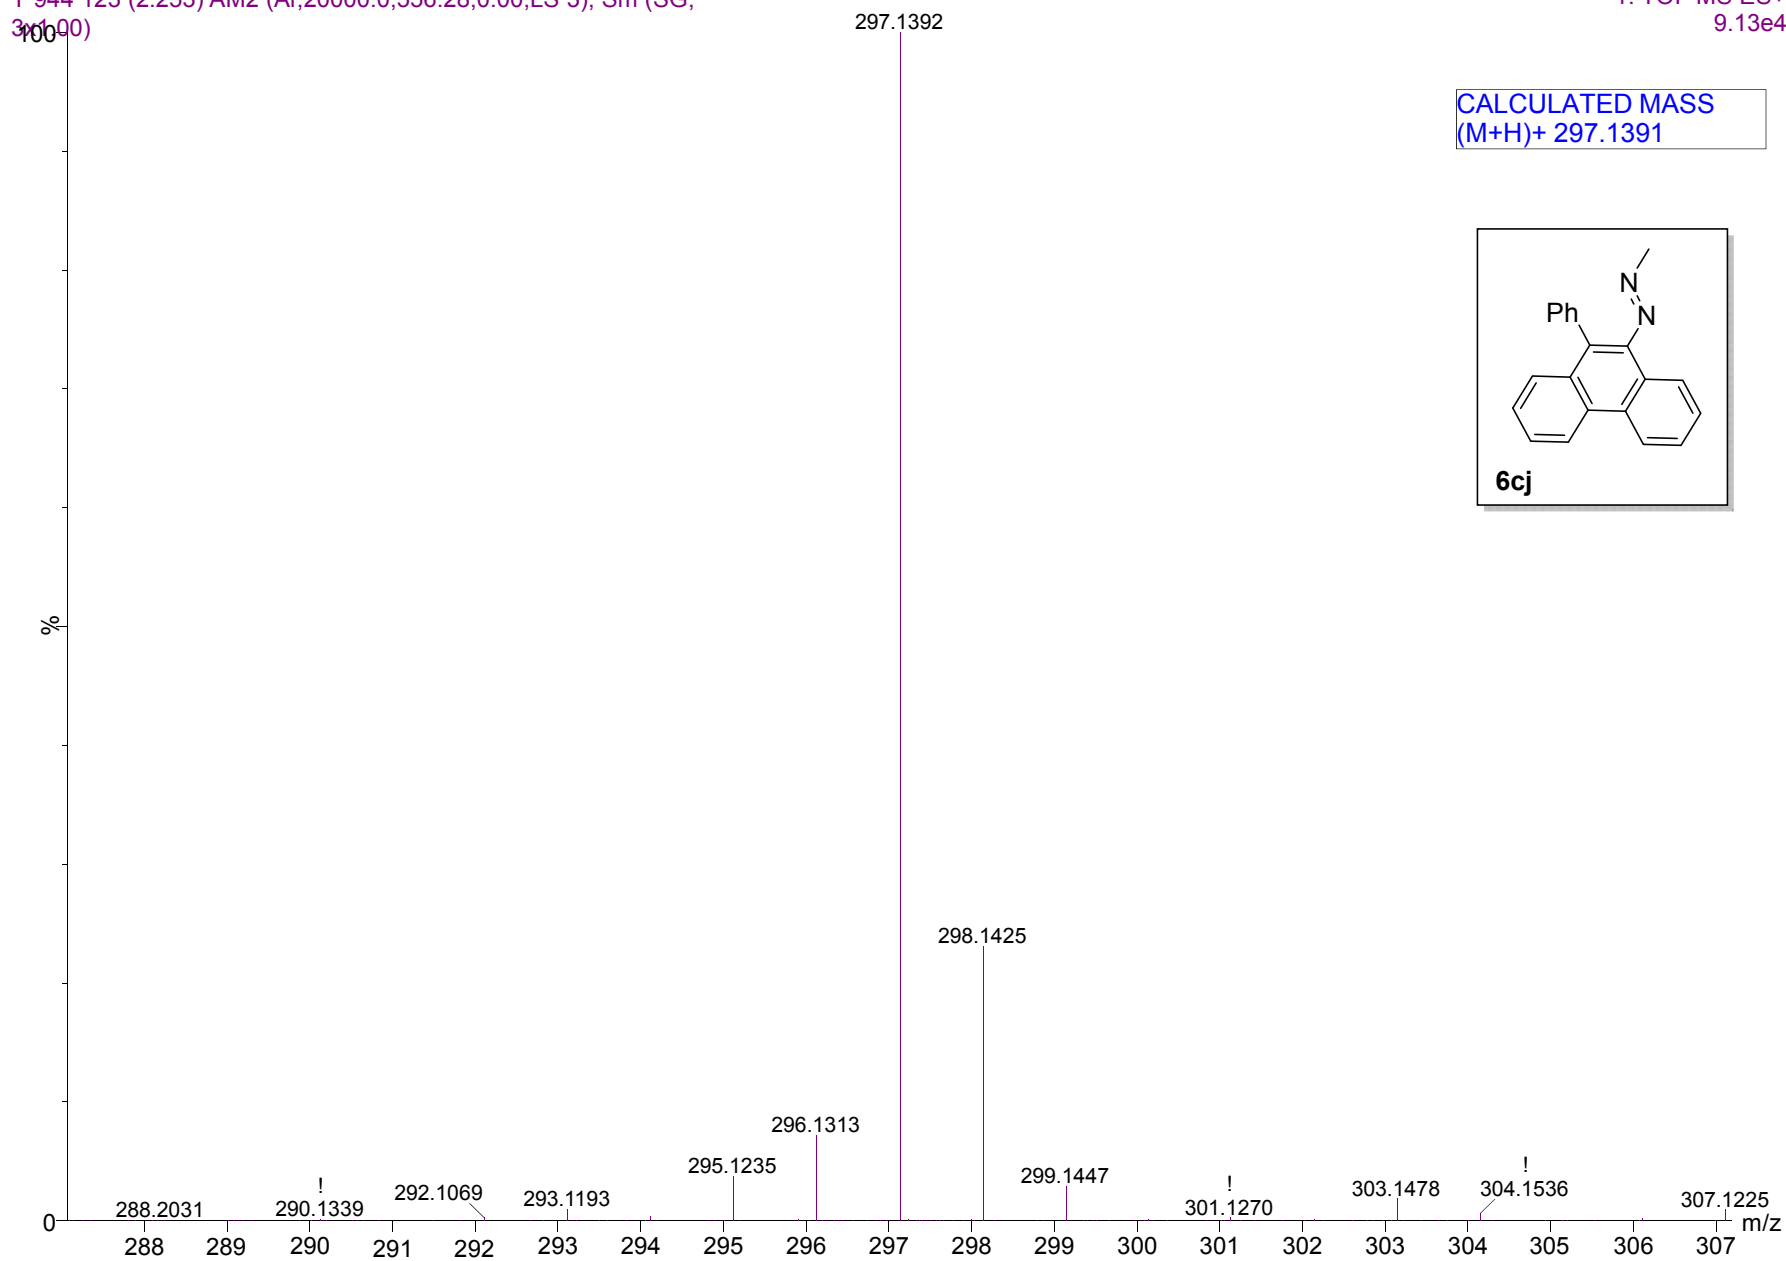

CHLOROFORM-d

Water

S 176

8.43  
8.41  
8.37  
8.35  
8.00  
7.99  
7.71  
7.66  
7.64  
7.63  
7.61  
7.60  
7.27

4.26

3.26

1.56

0.02

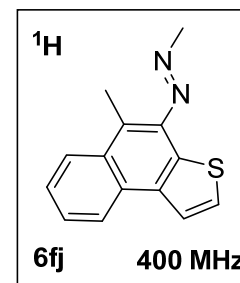

0.98 1.06 1.00 1.01 1.16 0.98

3.03

3.08

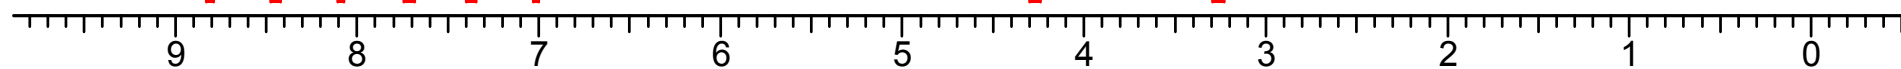

Chemical Shift (ppm)



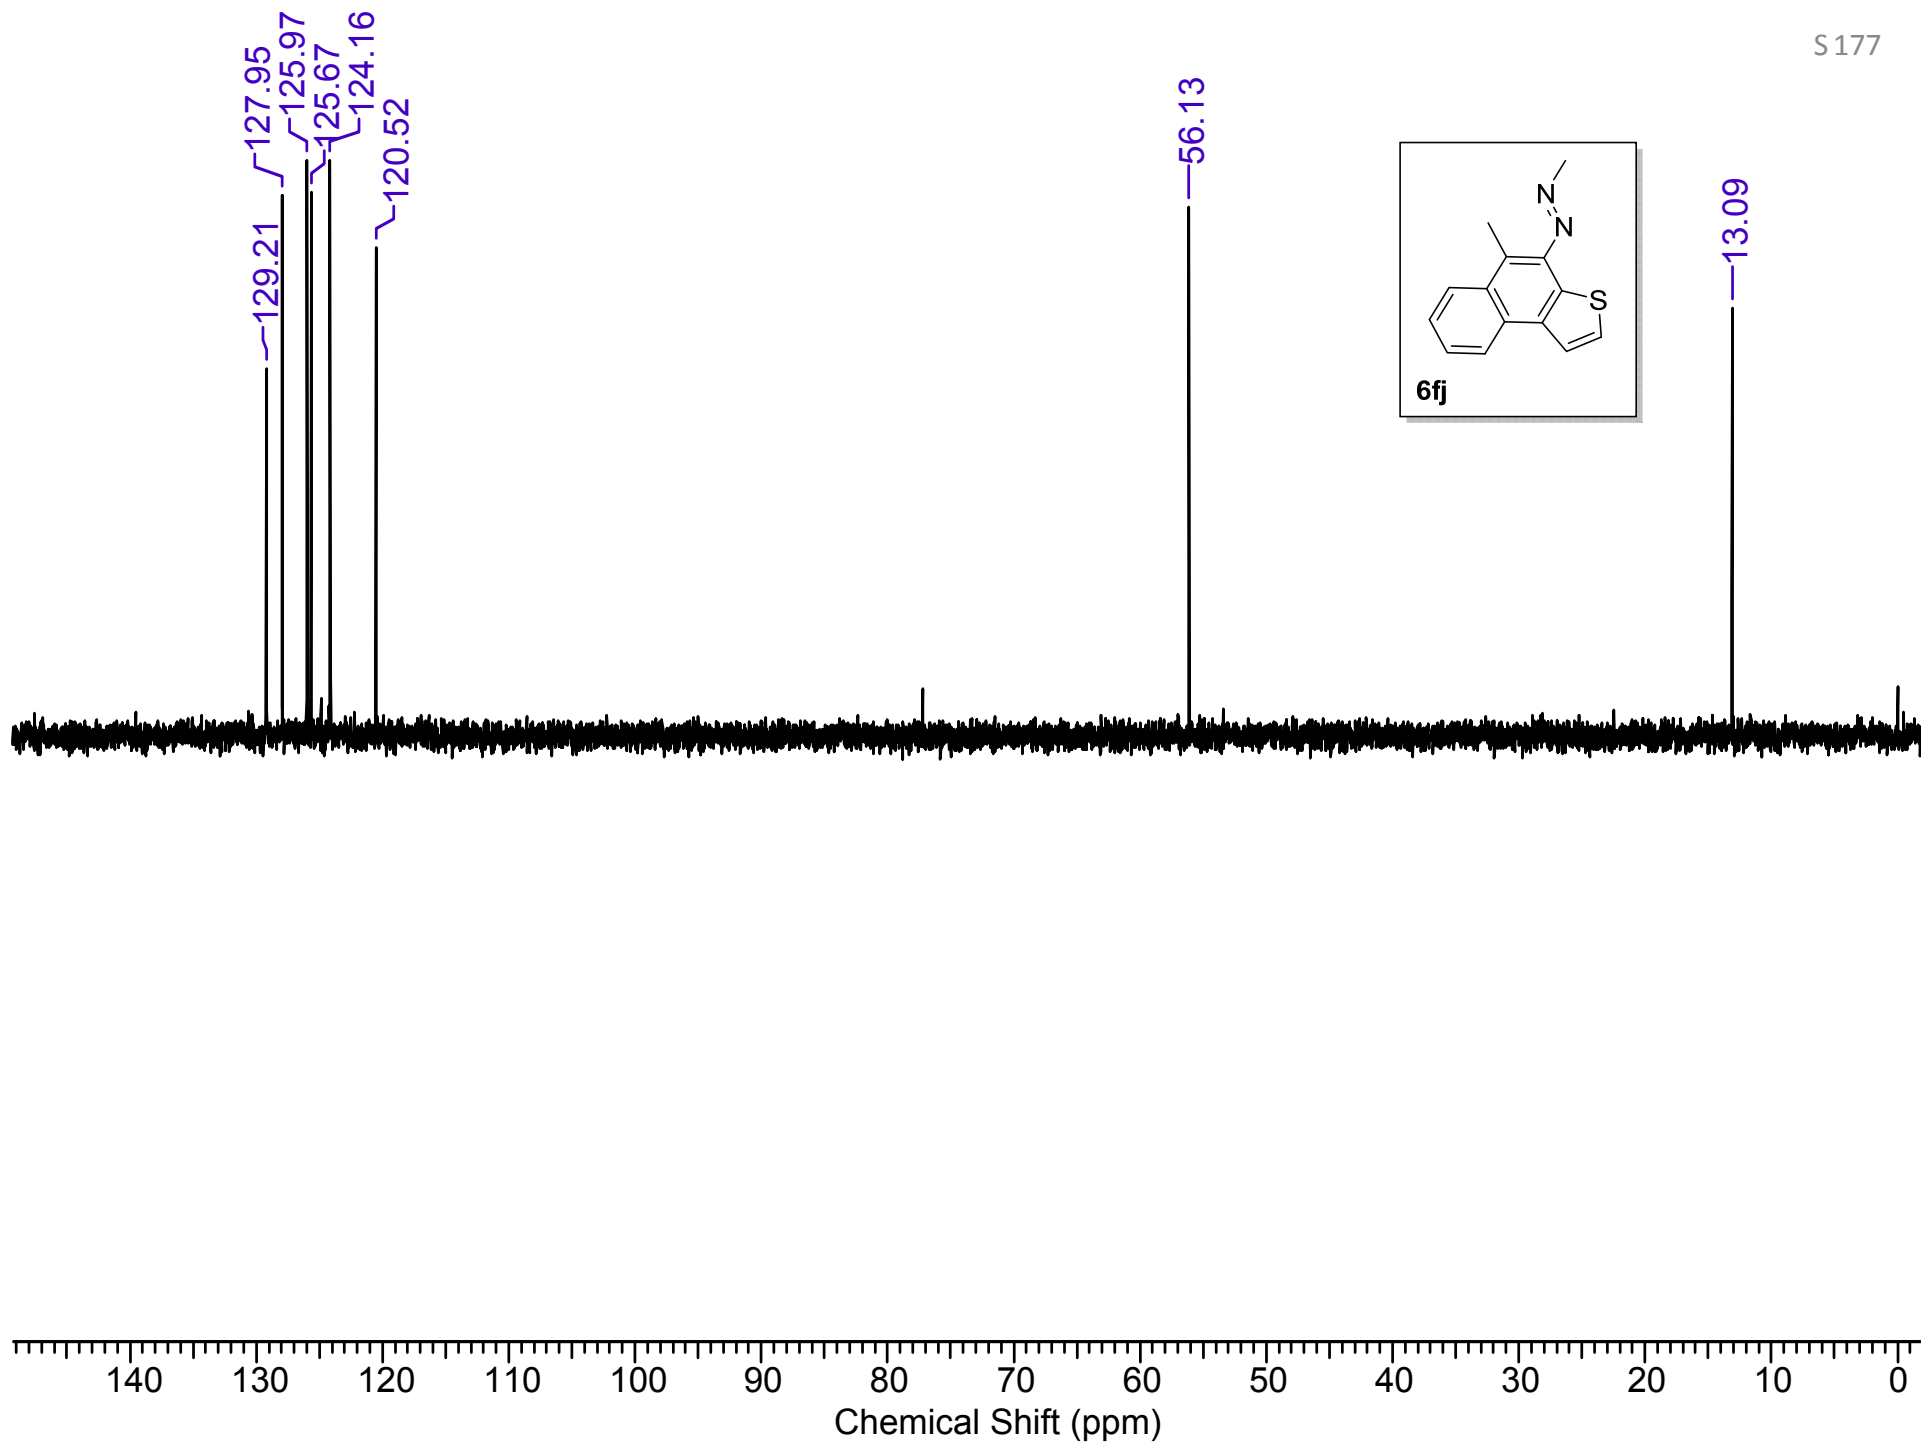

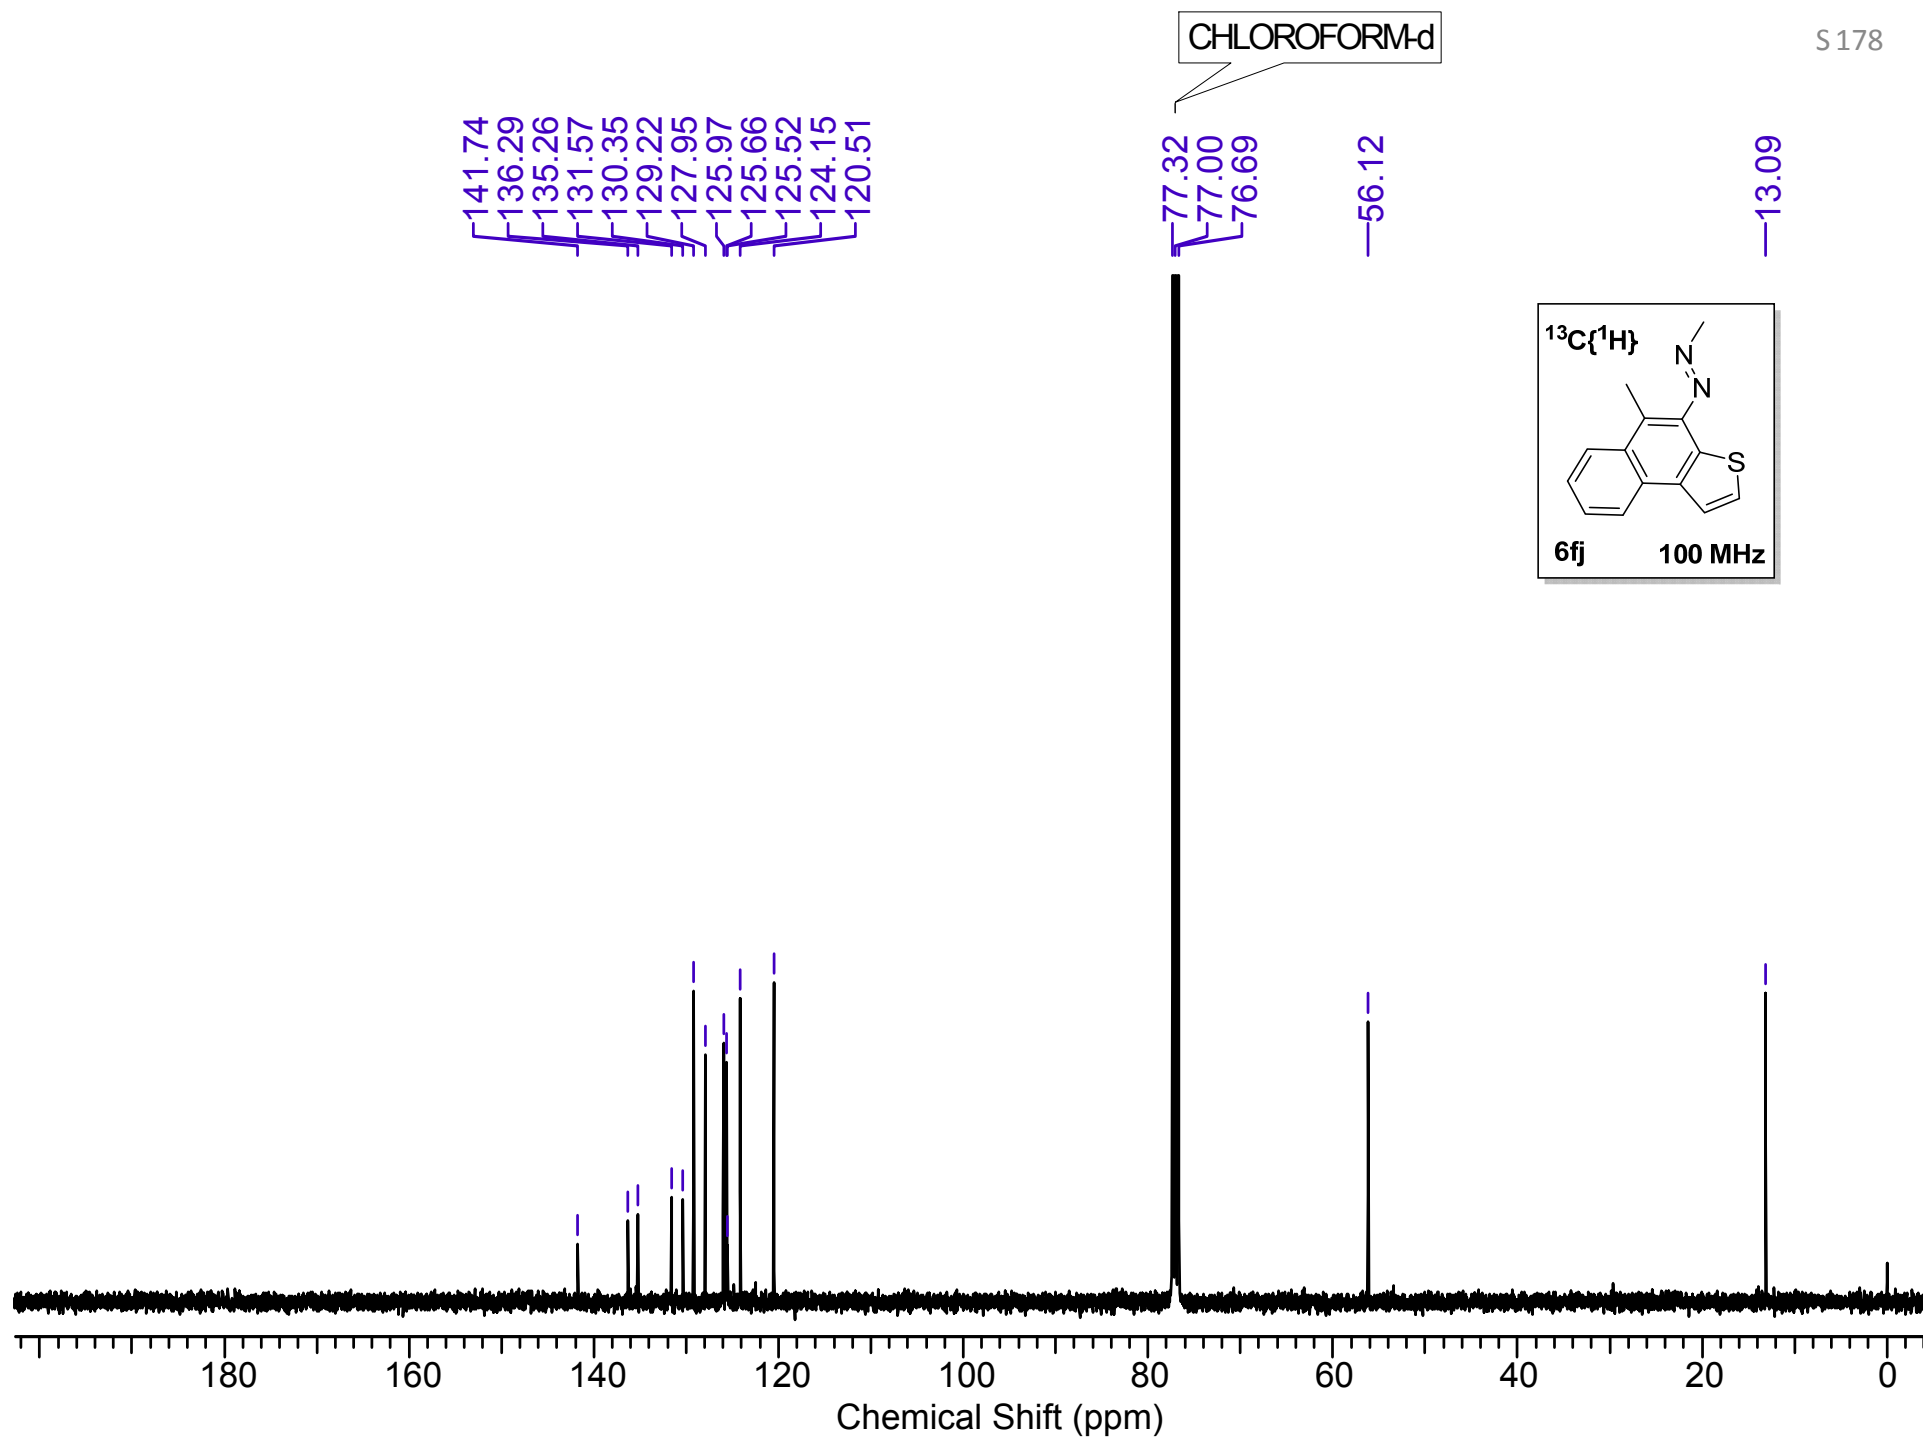

Y 943

IISER PUNE

1: TOF MS ES+  
9.05e3Y 943 158 (2.889) AM2 (Ar,20000.0,556.28,0.00,LS 3); Sm (SG,  
300.00)CALCULATED MASS  
(M+H)+ 241.0799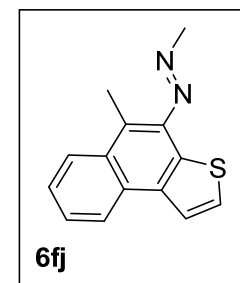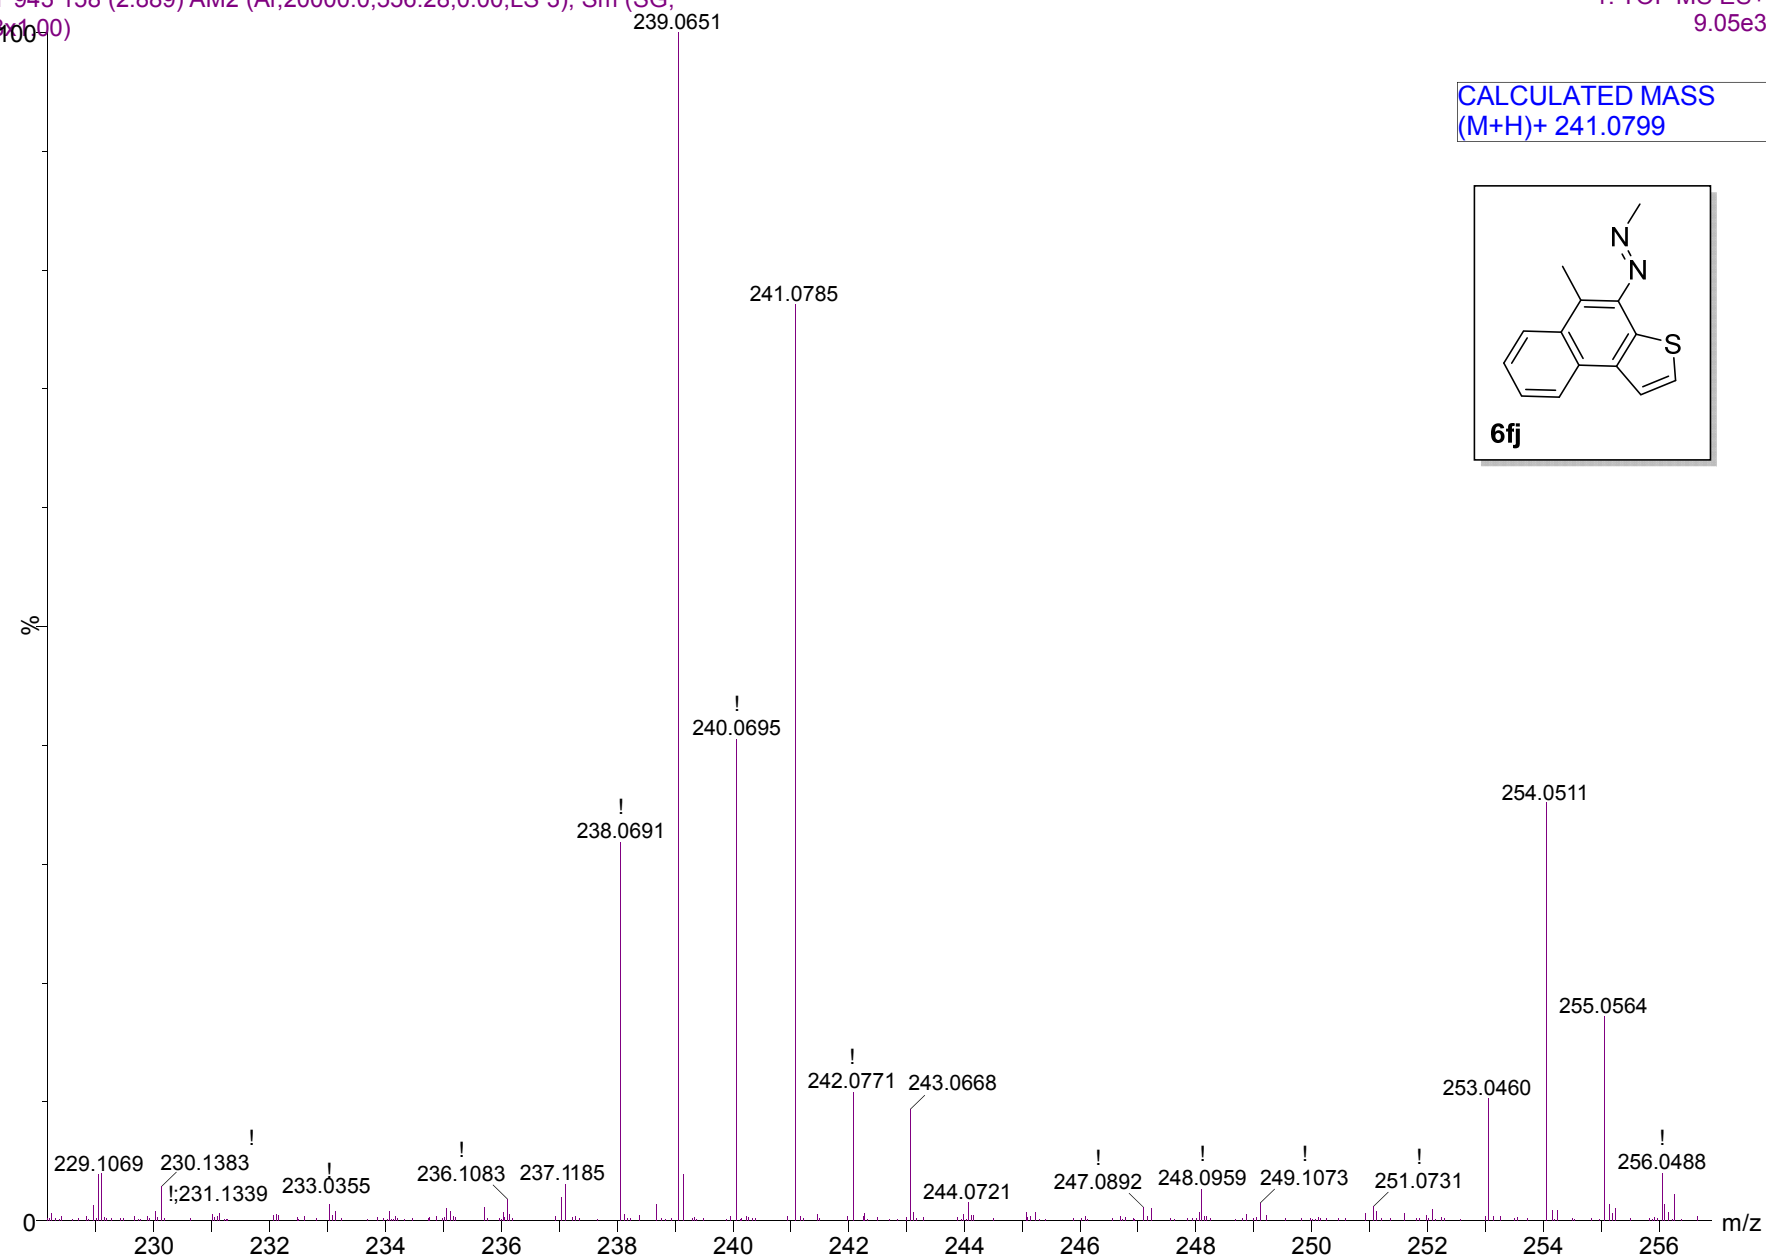

CHLOROFORM-d

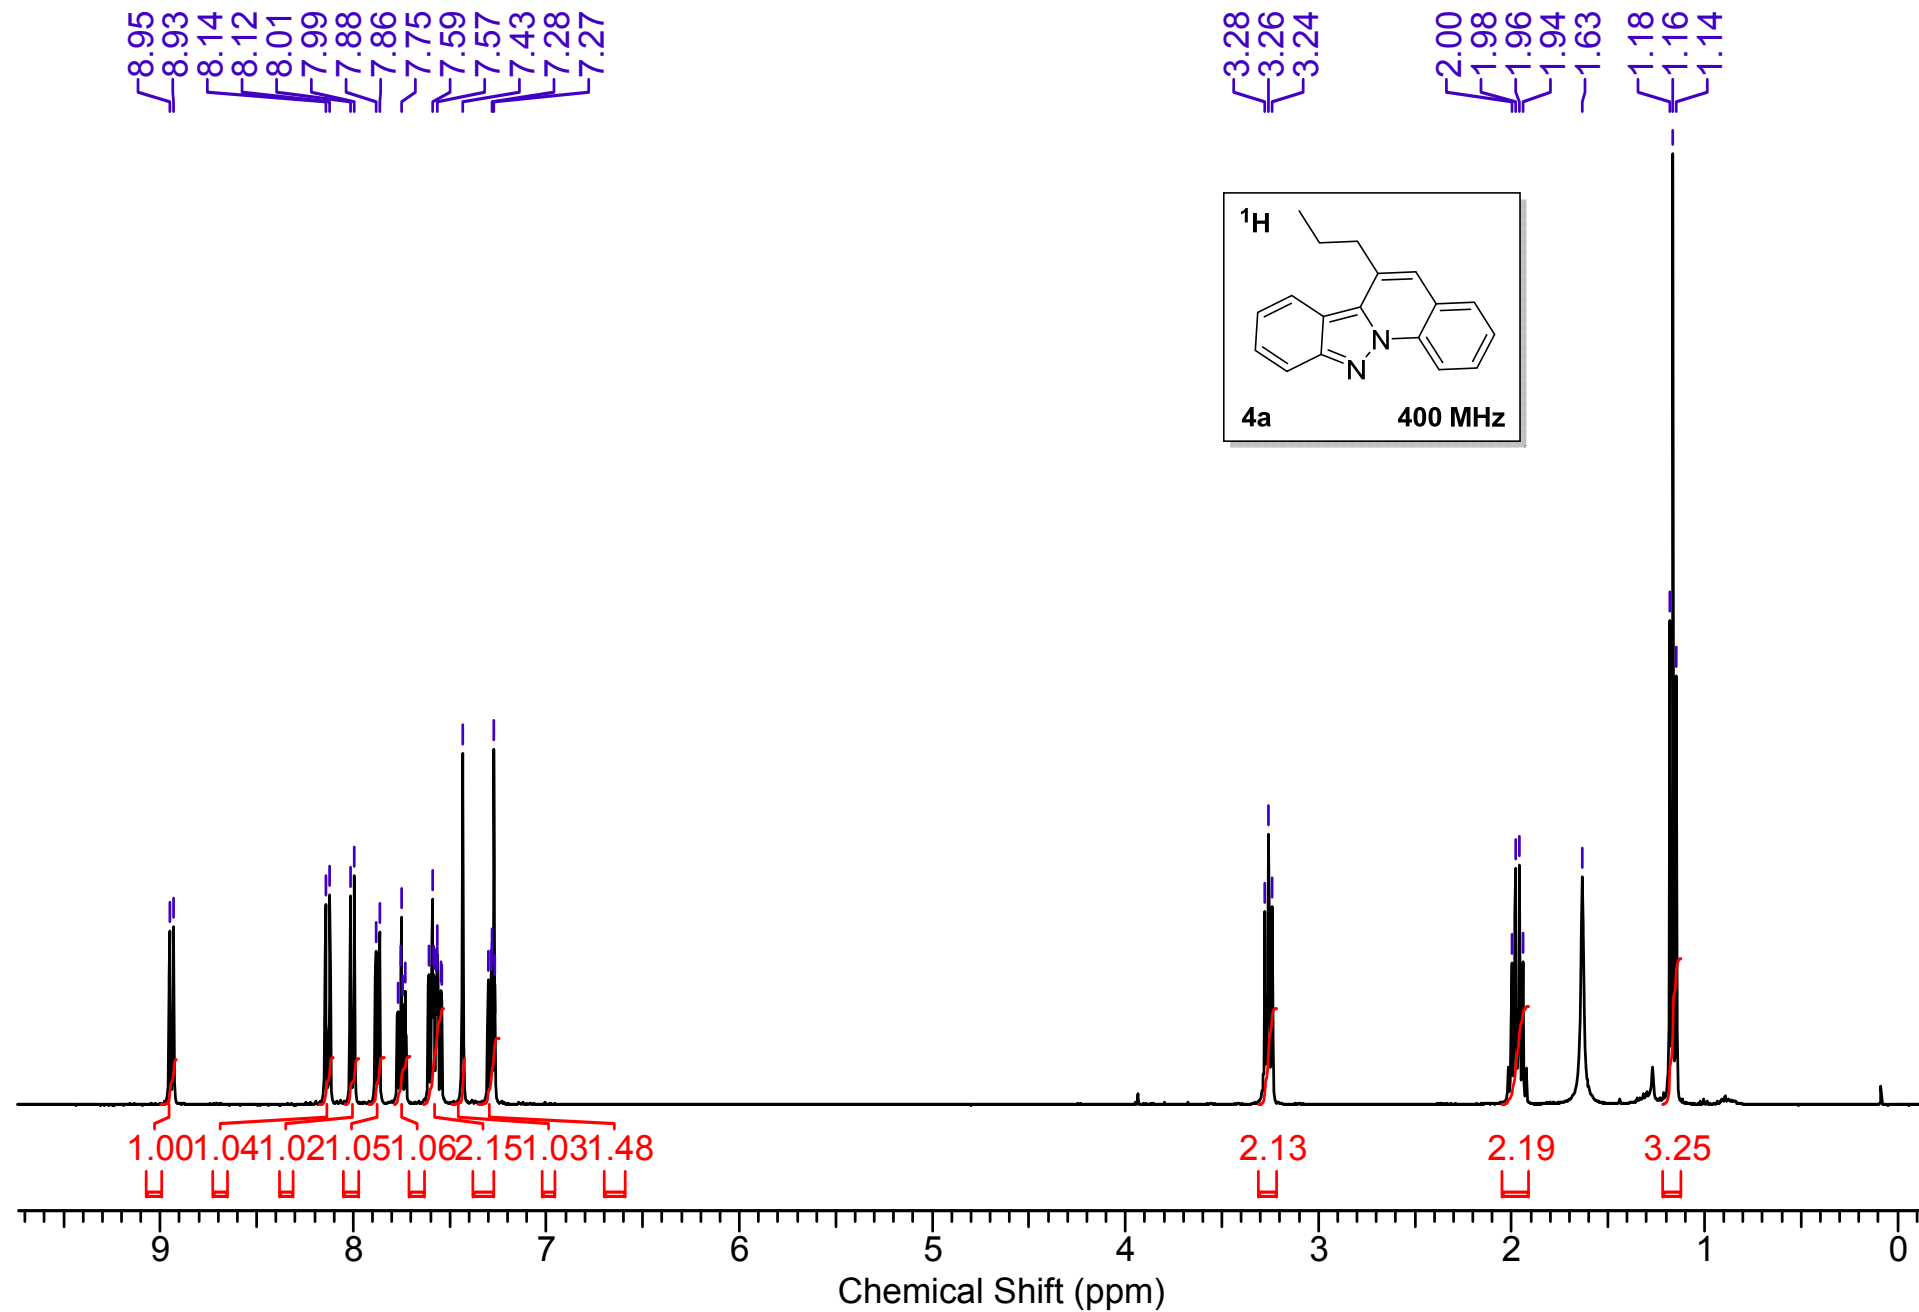

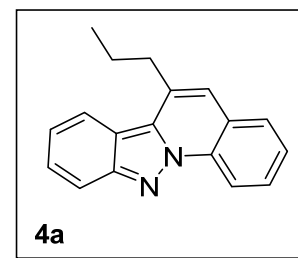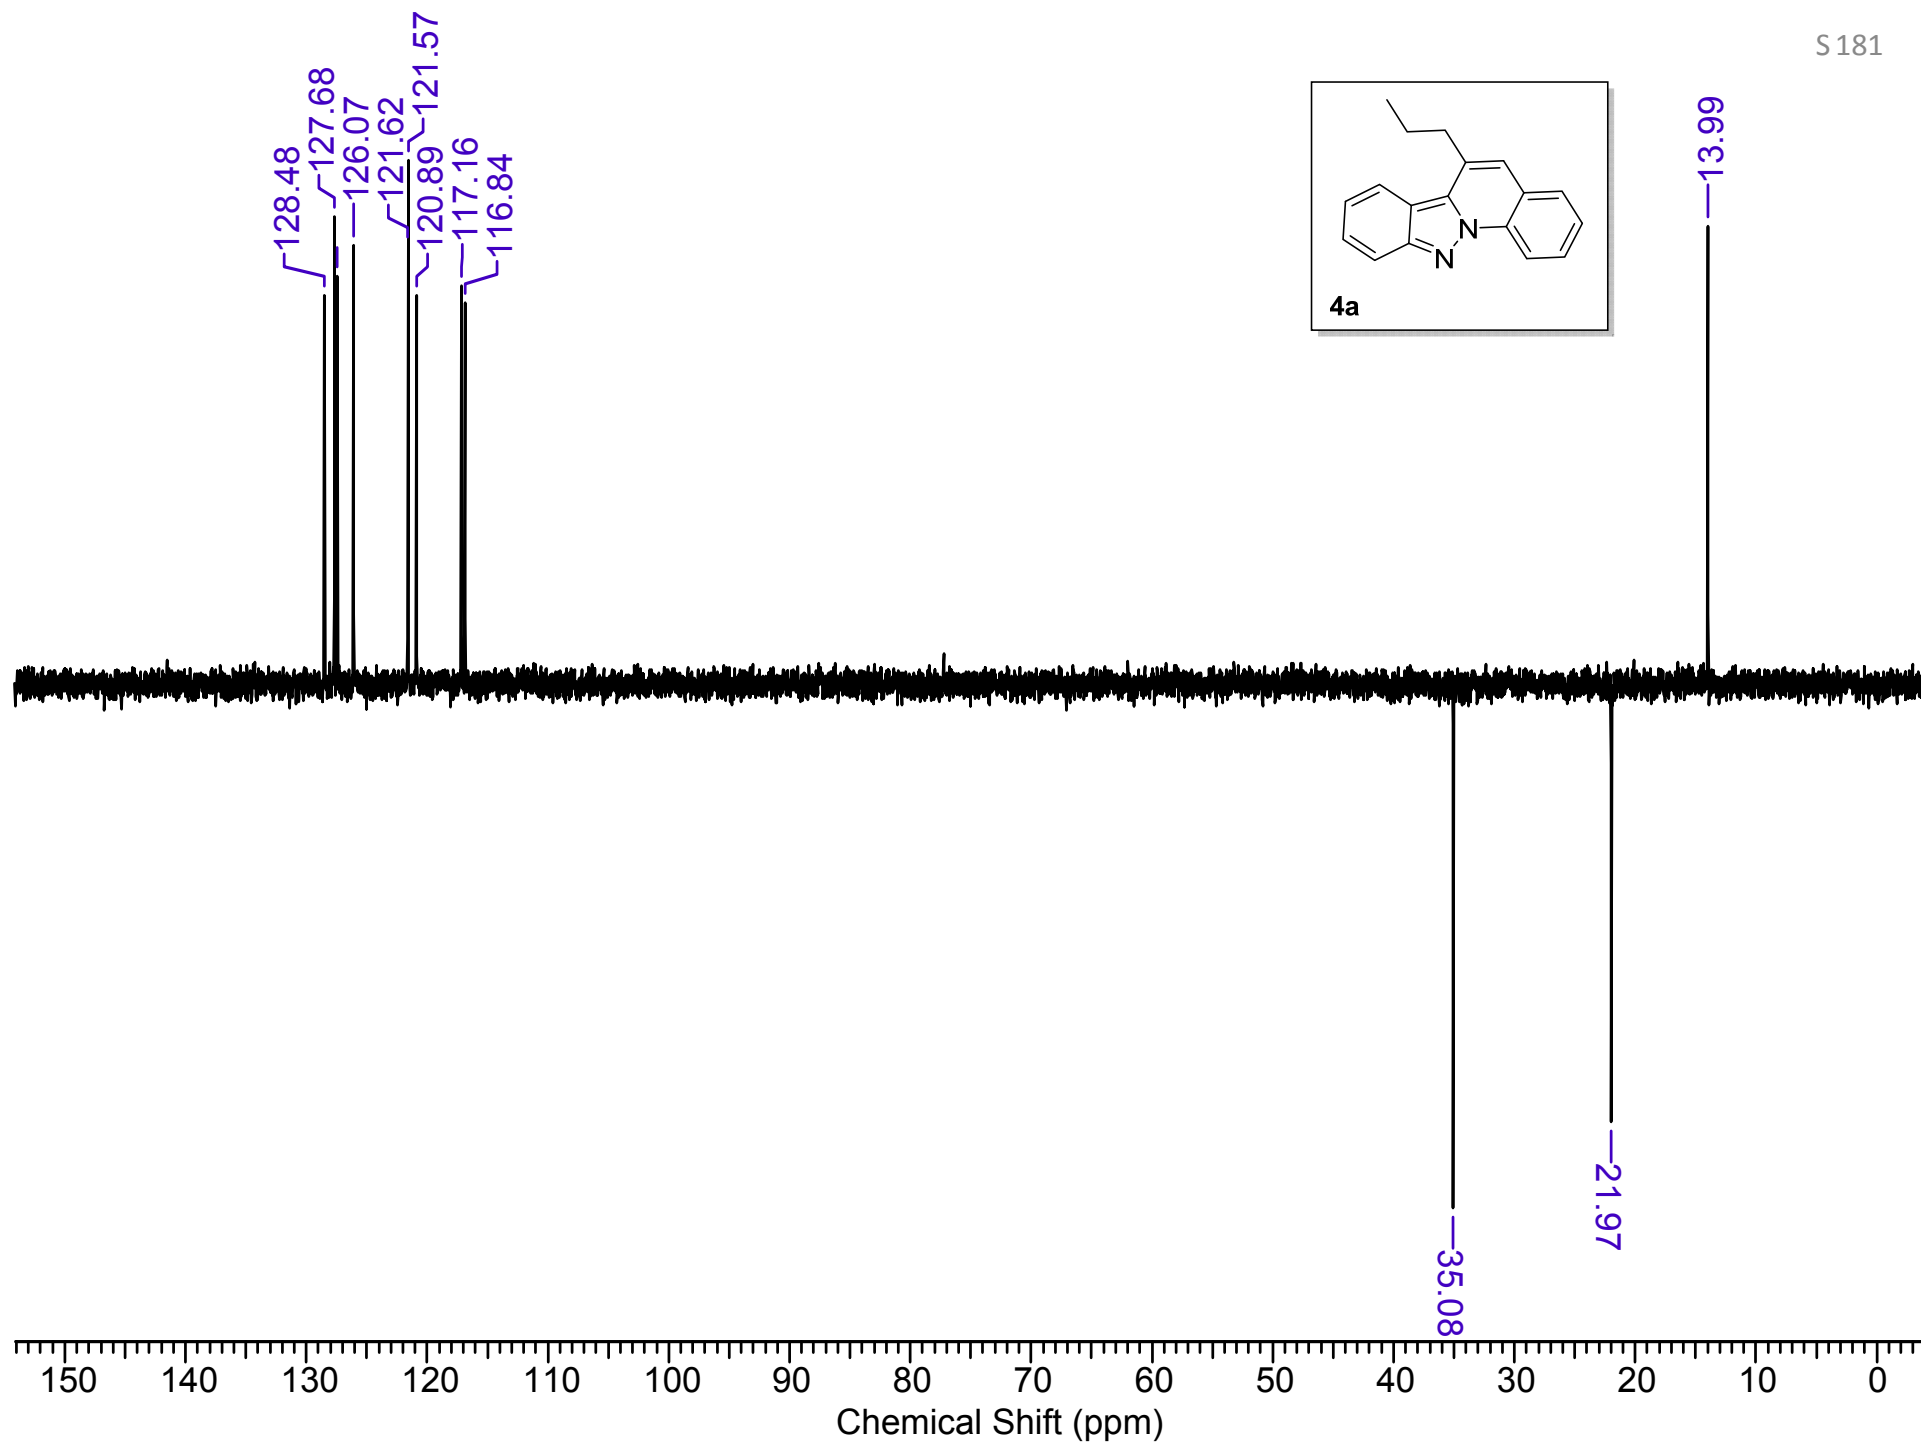

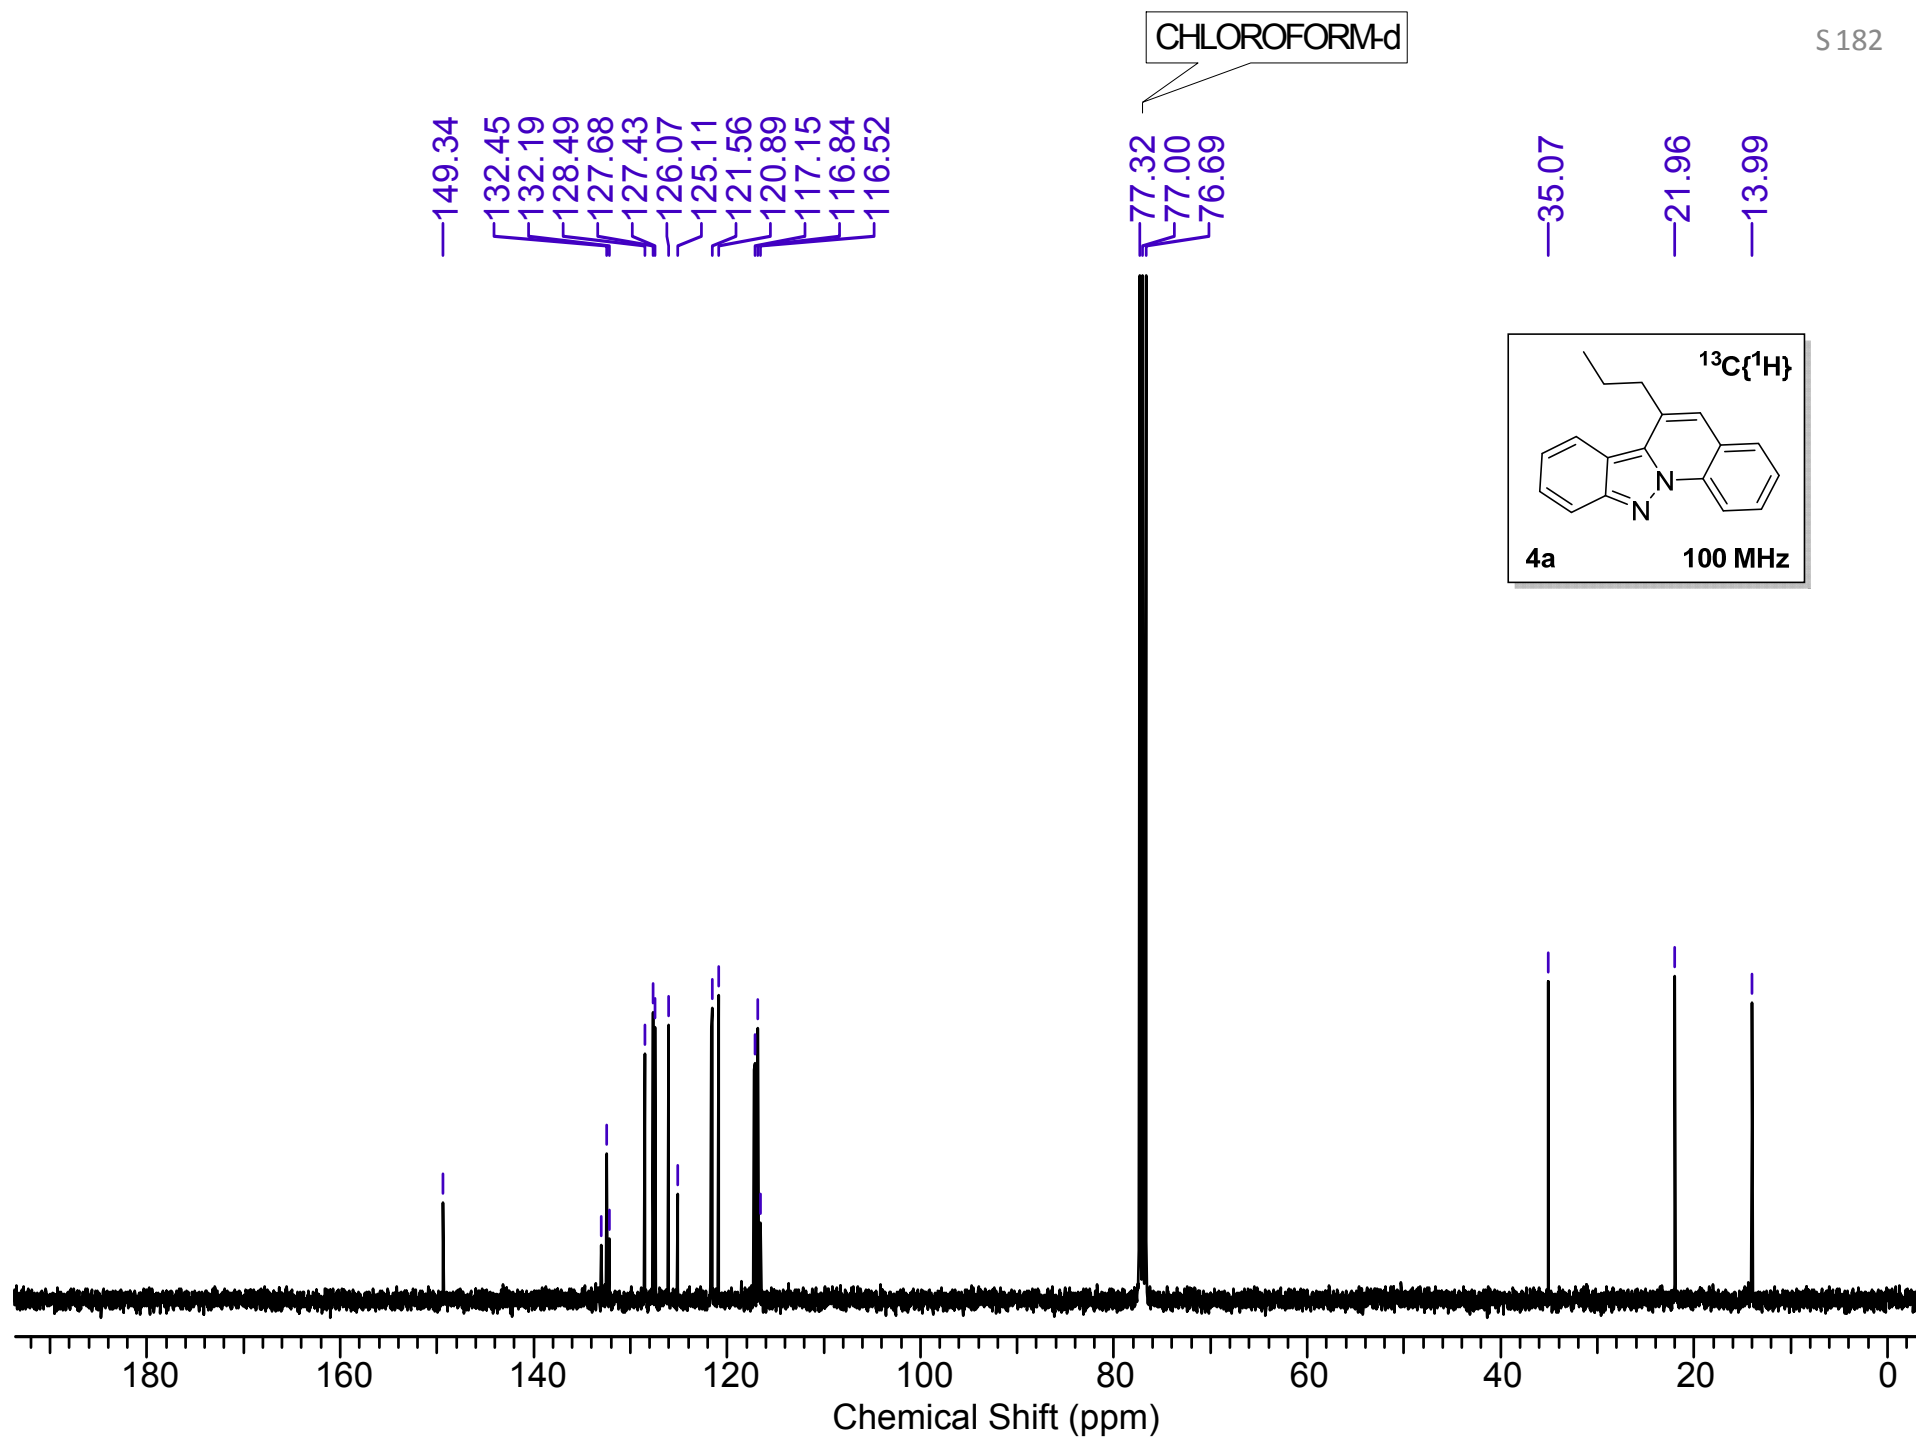

PSD-Fluorescence #491 RT: 4.02 AV: 1 NL: 3.16E8  
T: FTMS + p ESI Full ms [100.0000-1500.0000]

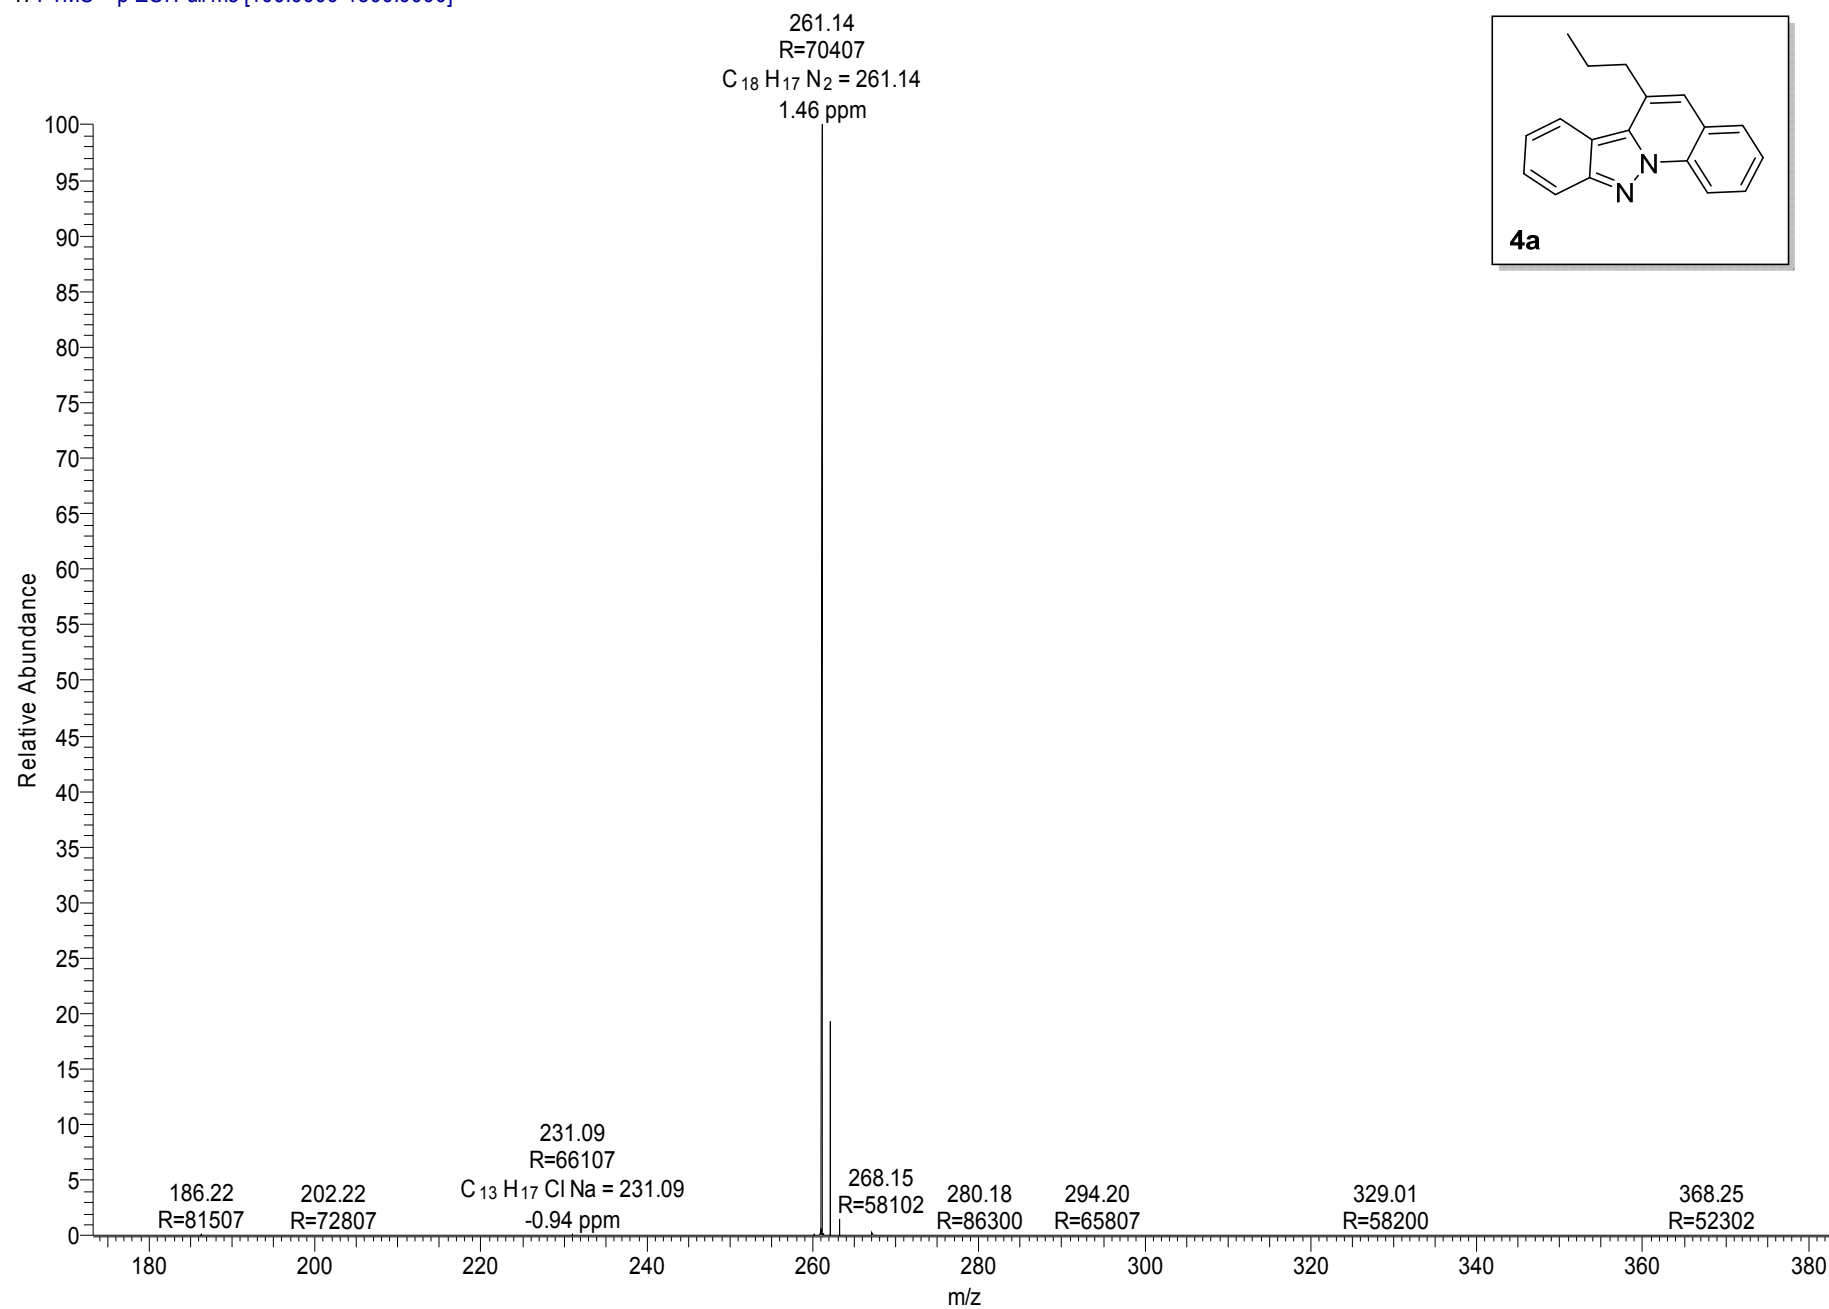

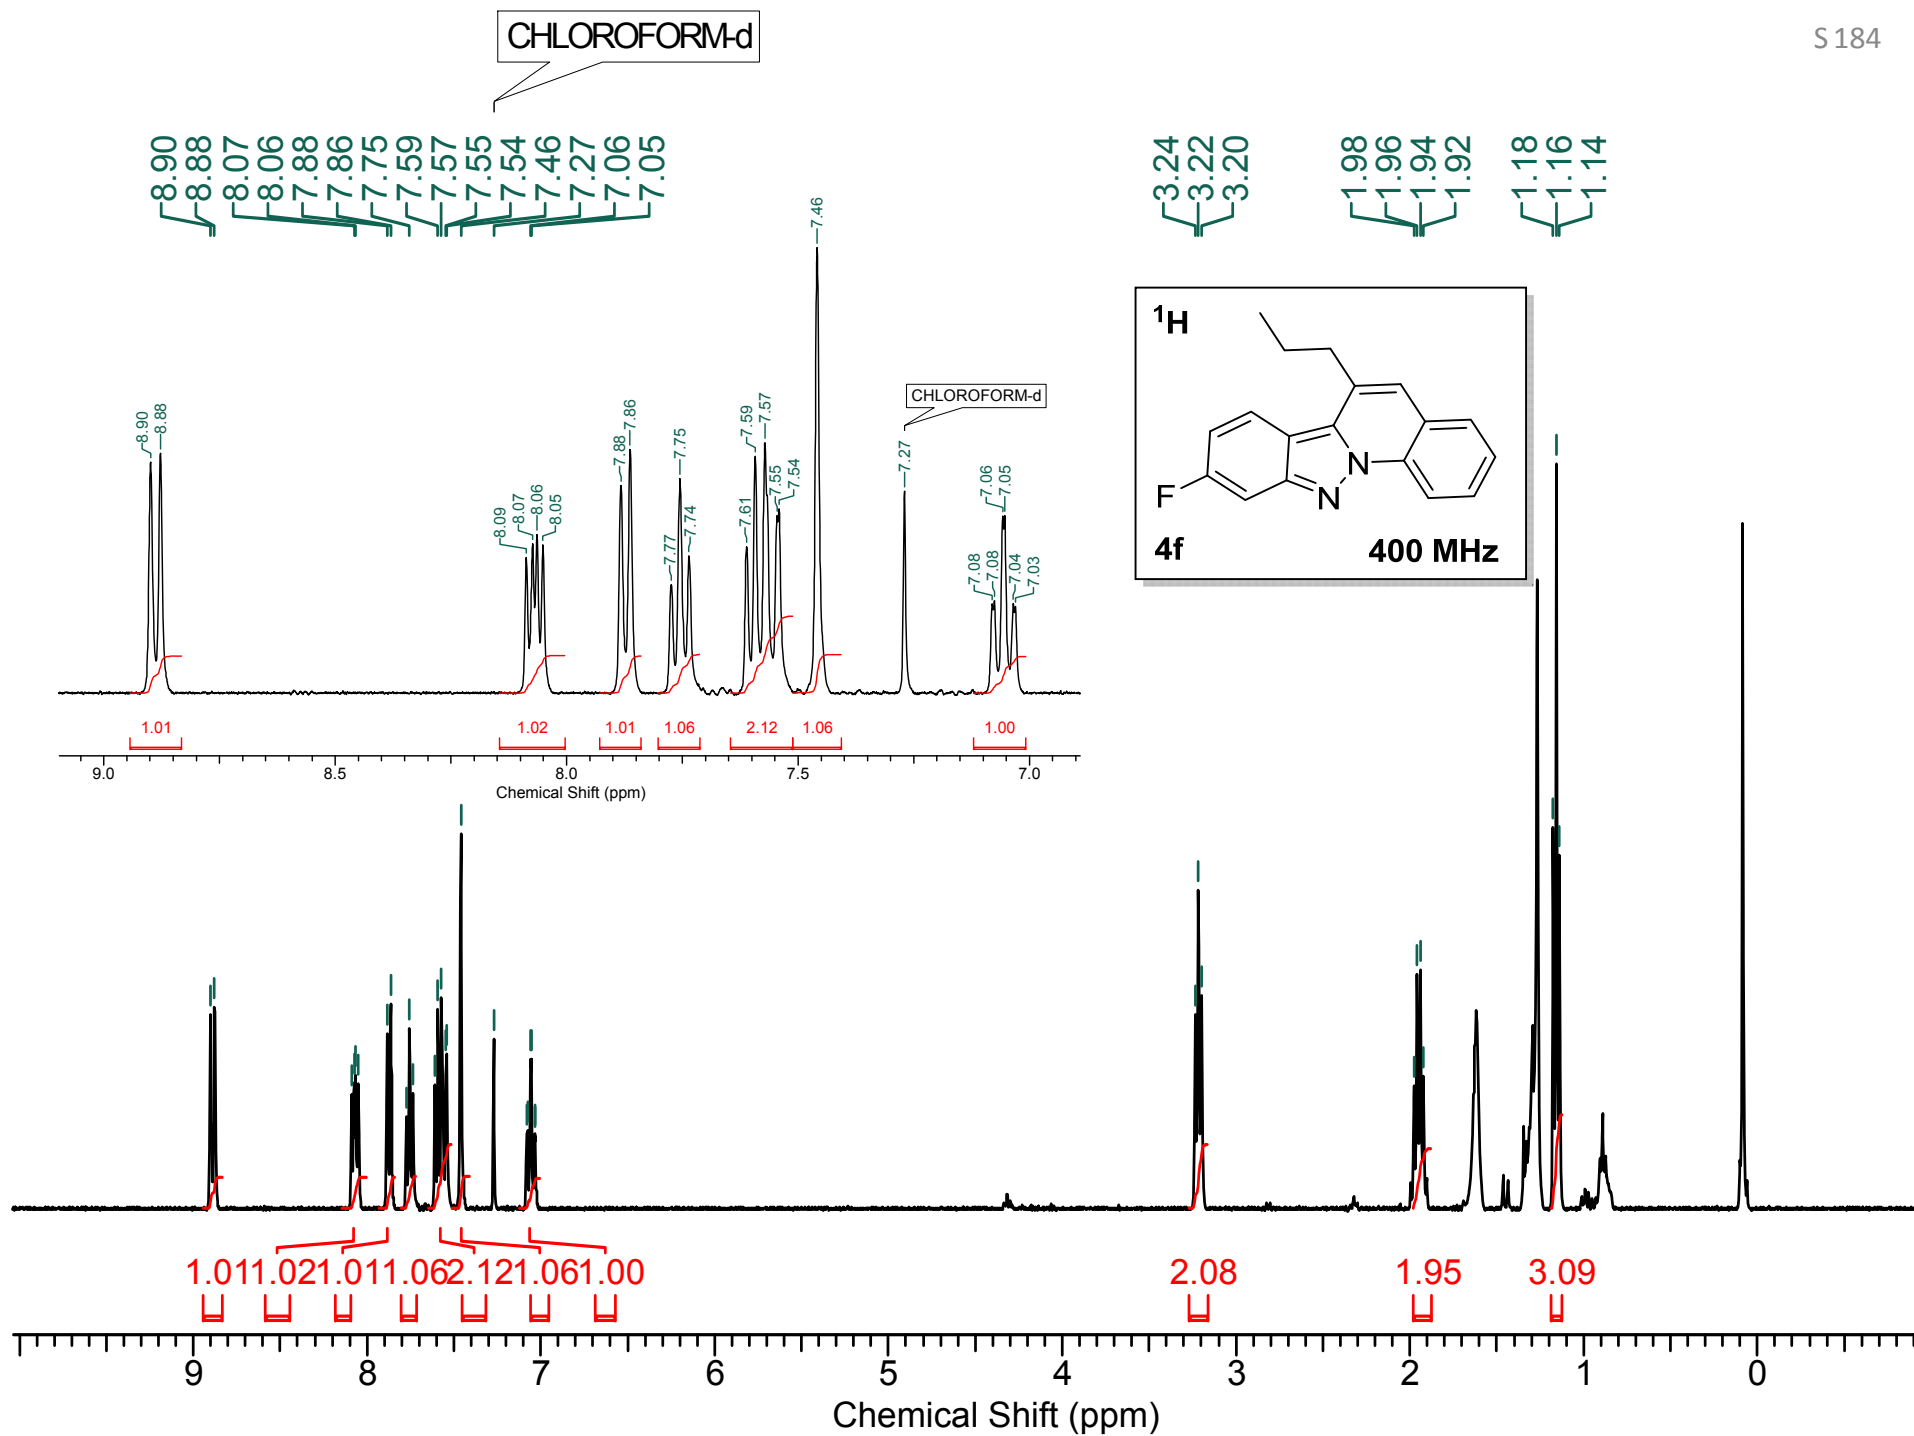



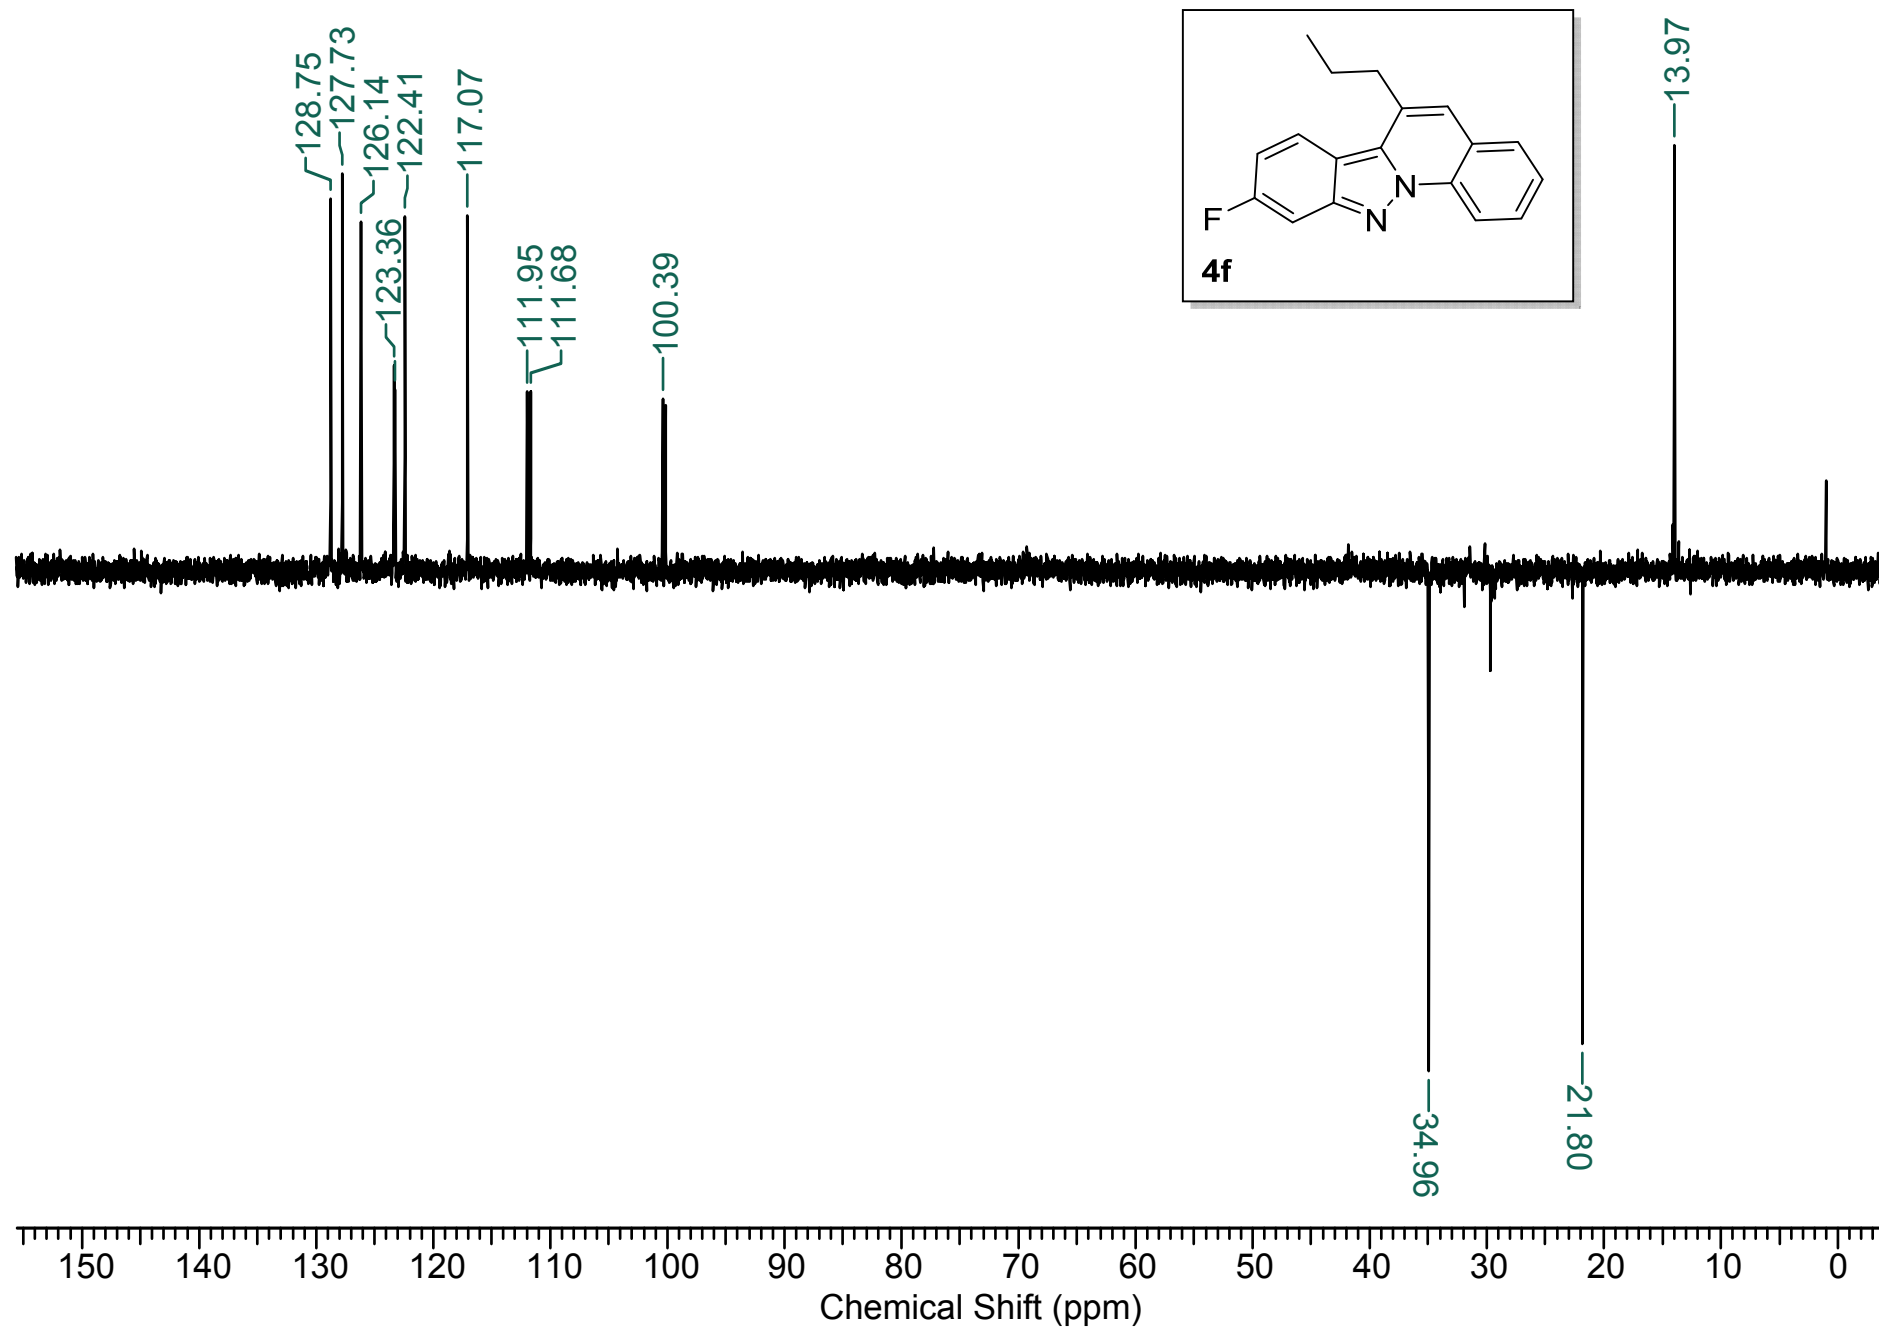

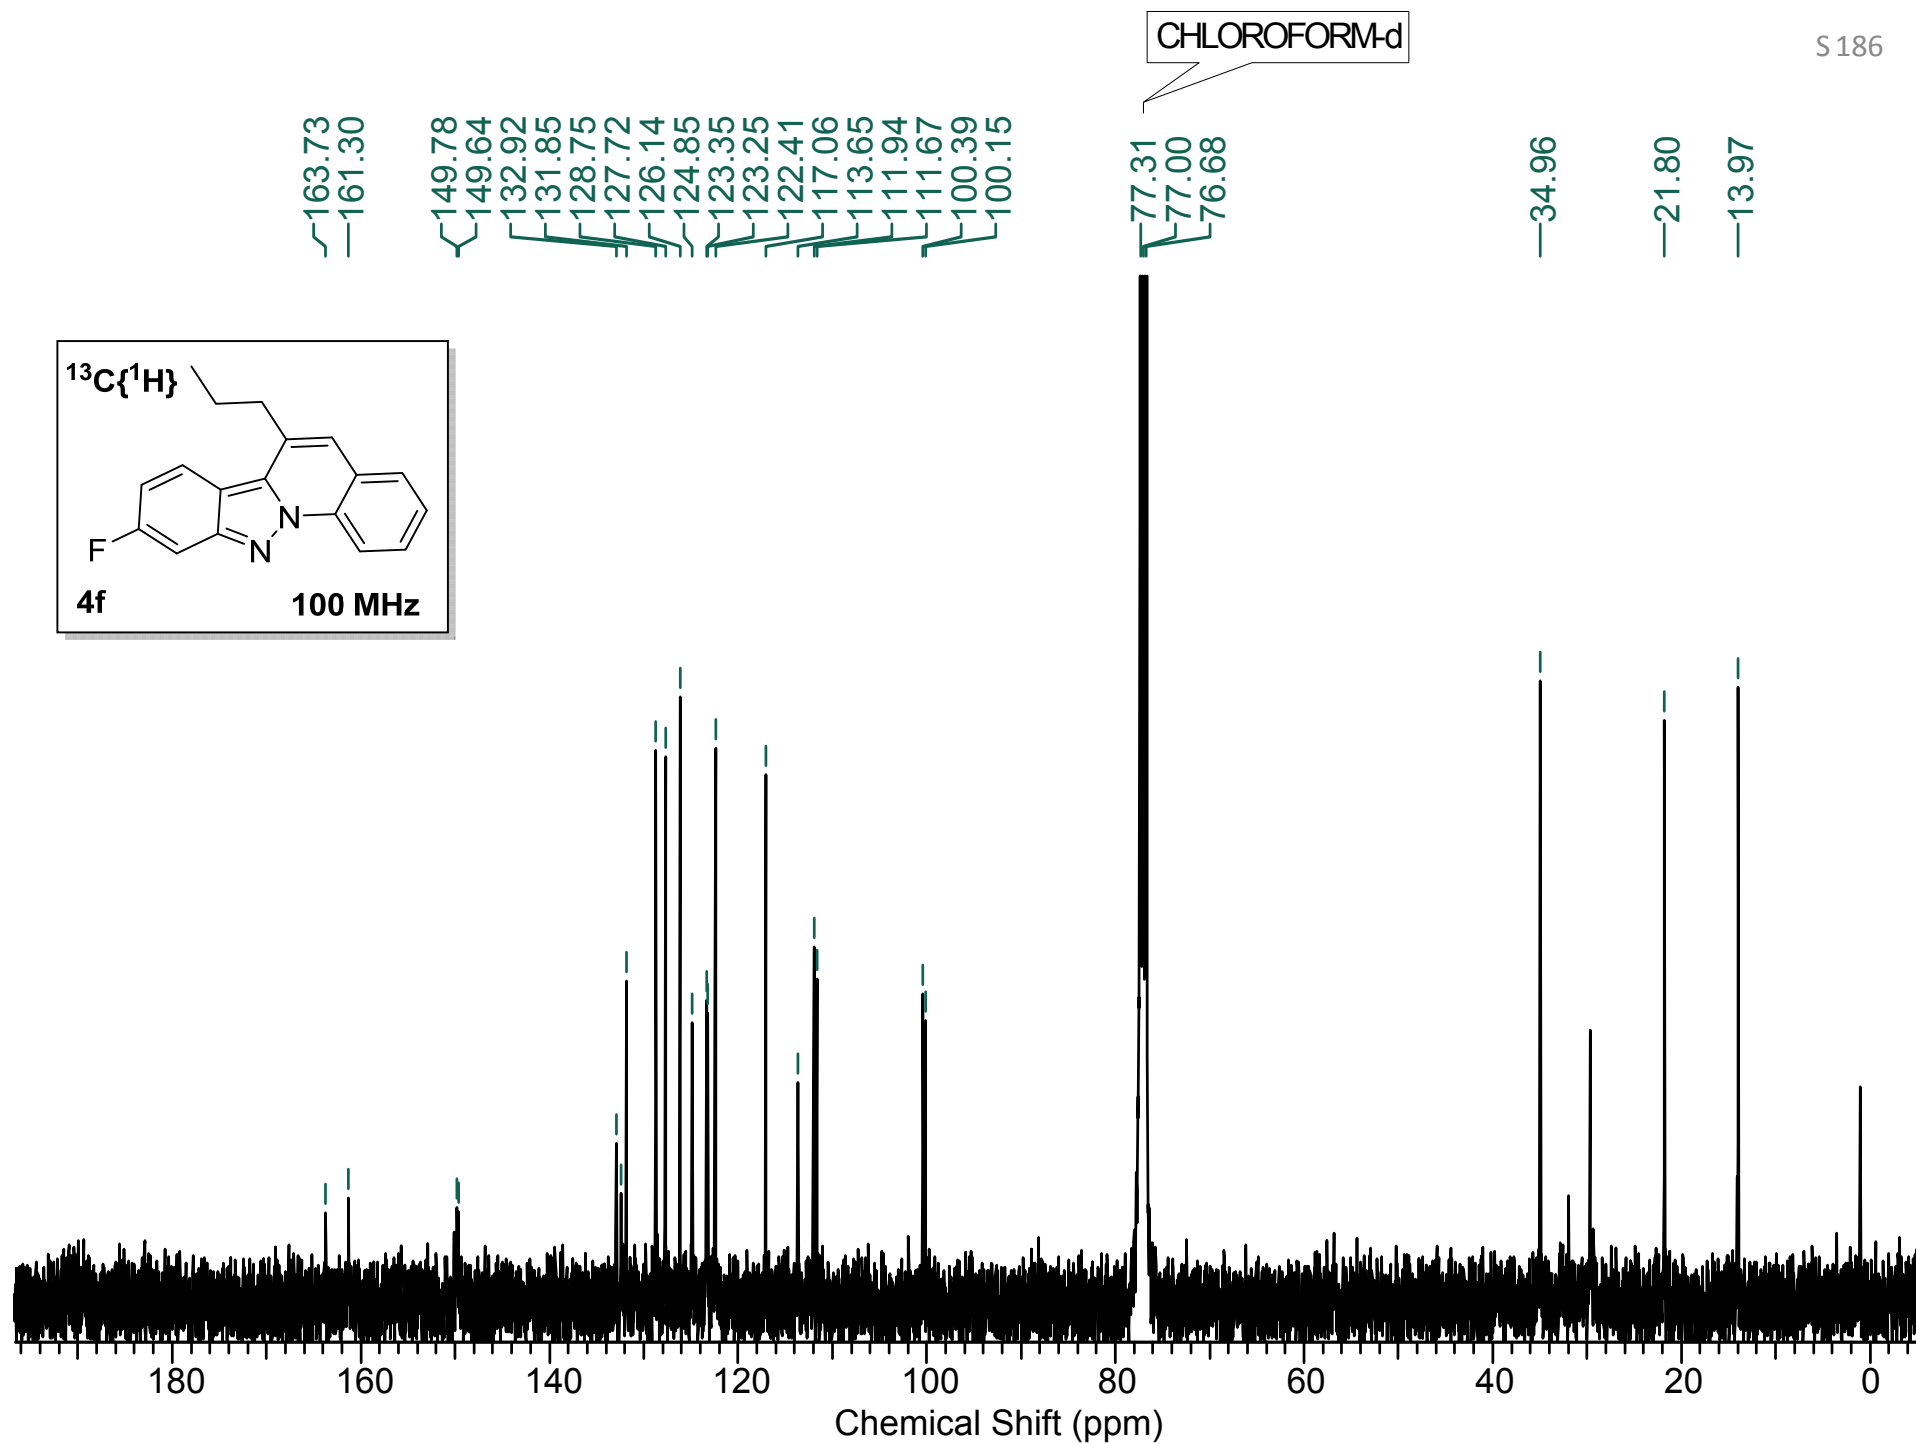

PSD-78K #562 RT: 3.08 AV: 1 NL: 1.15E9  
T: FTMS + p ESI Full ms [100.0000-1500.0000]

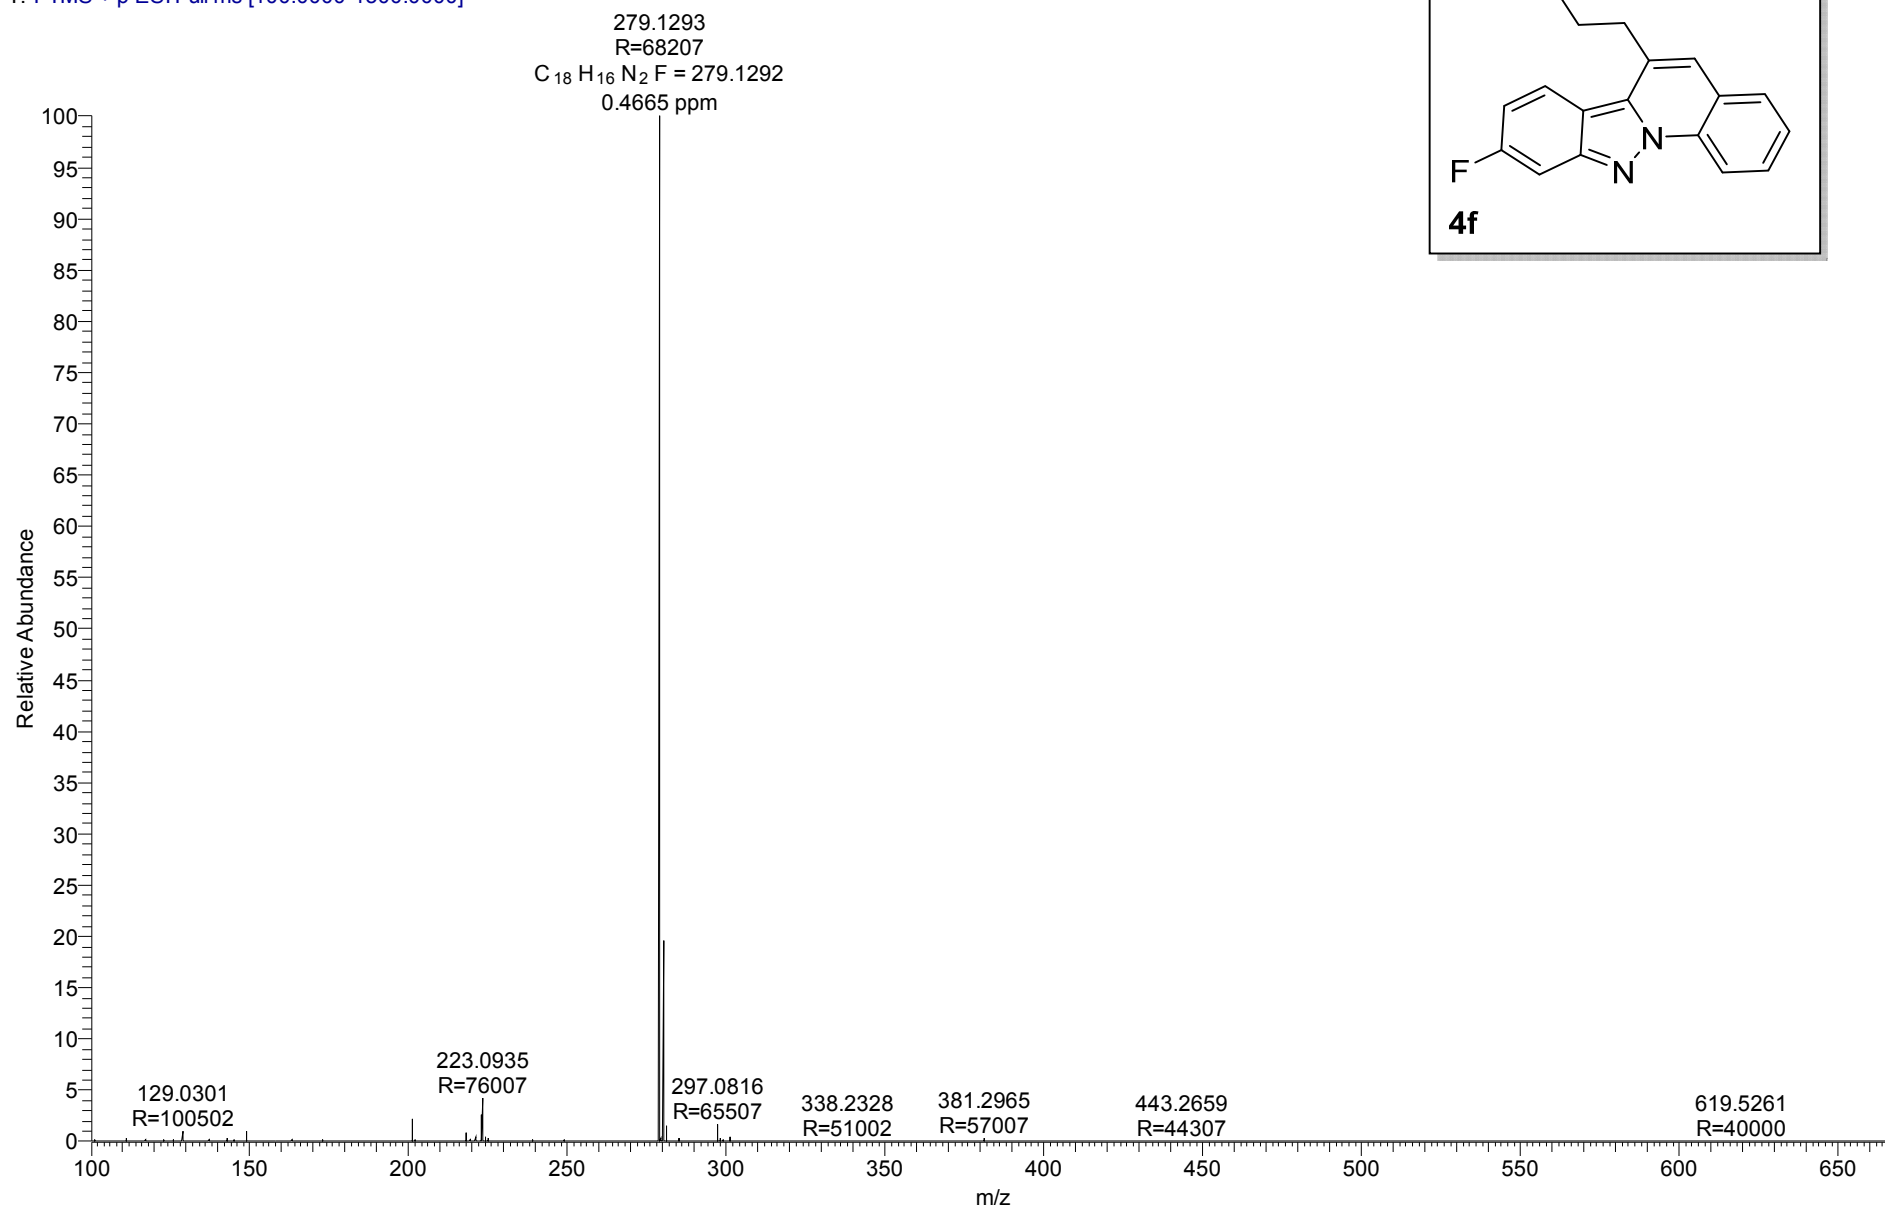

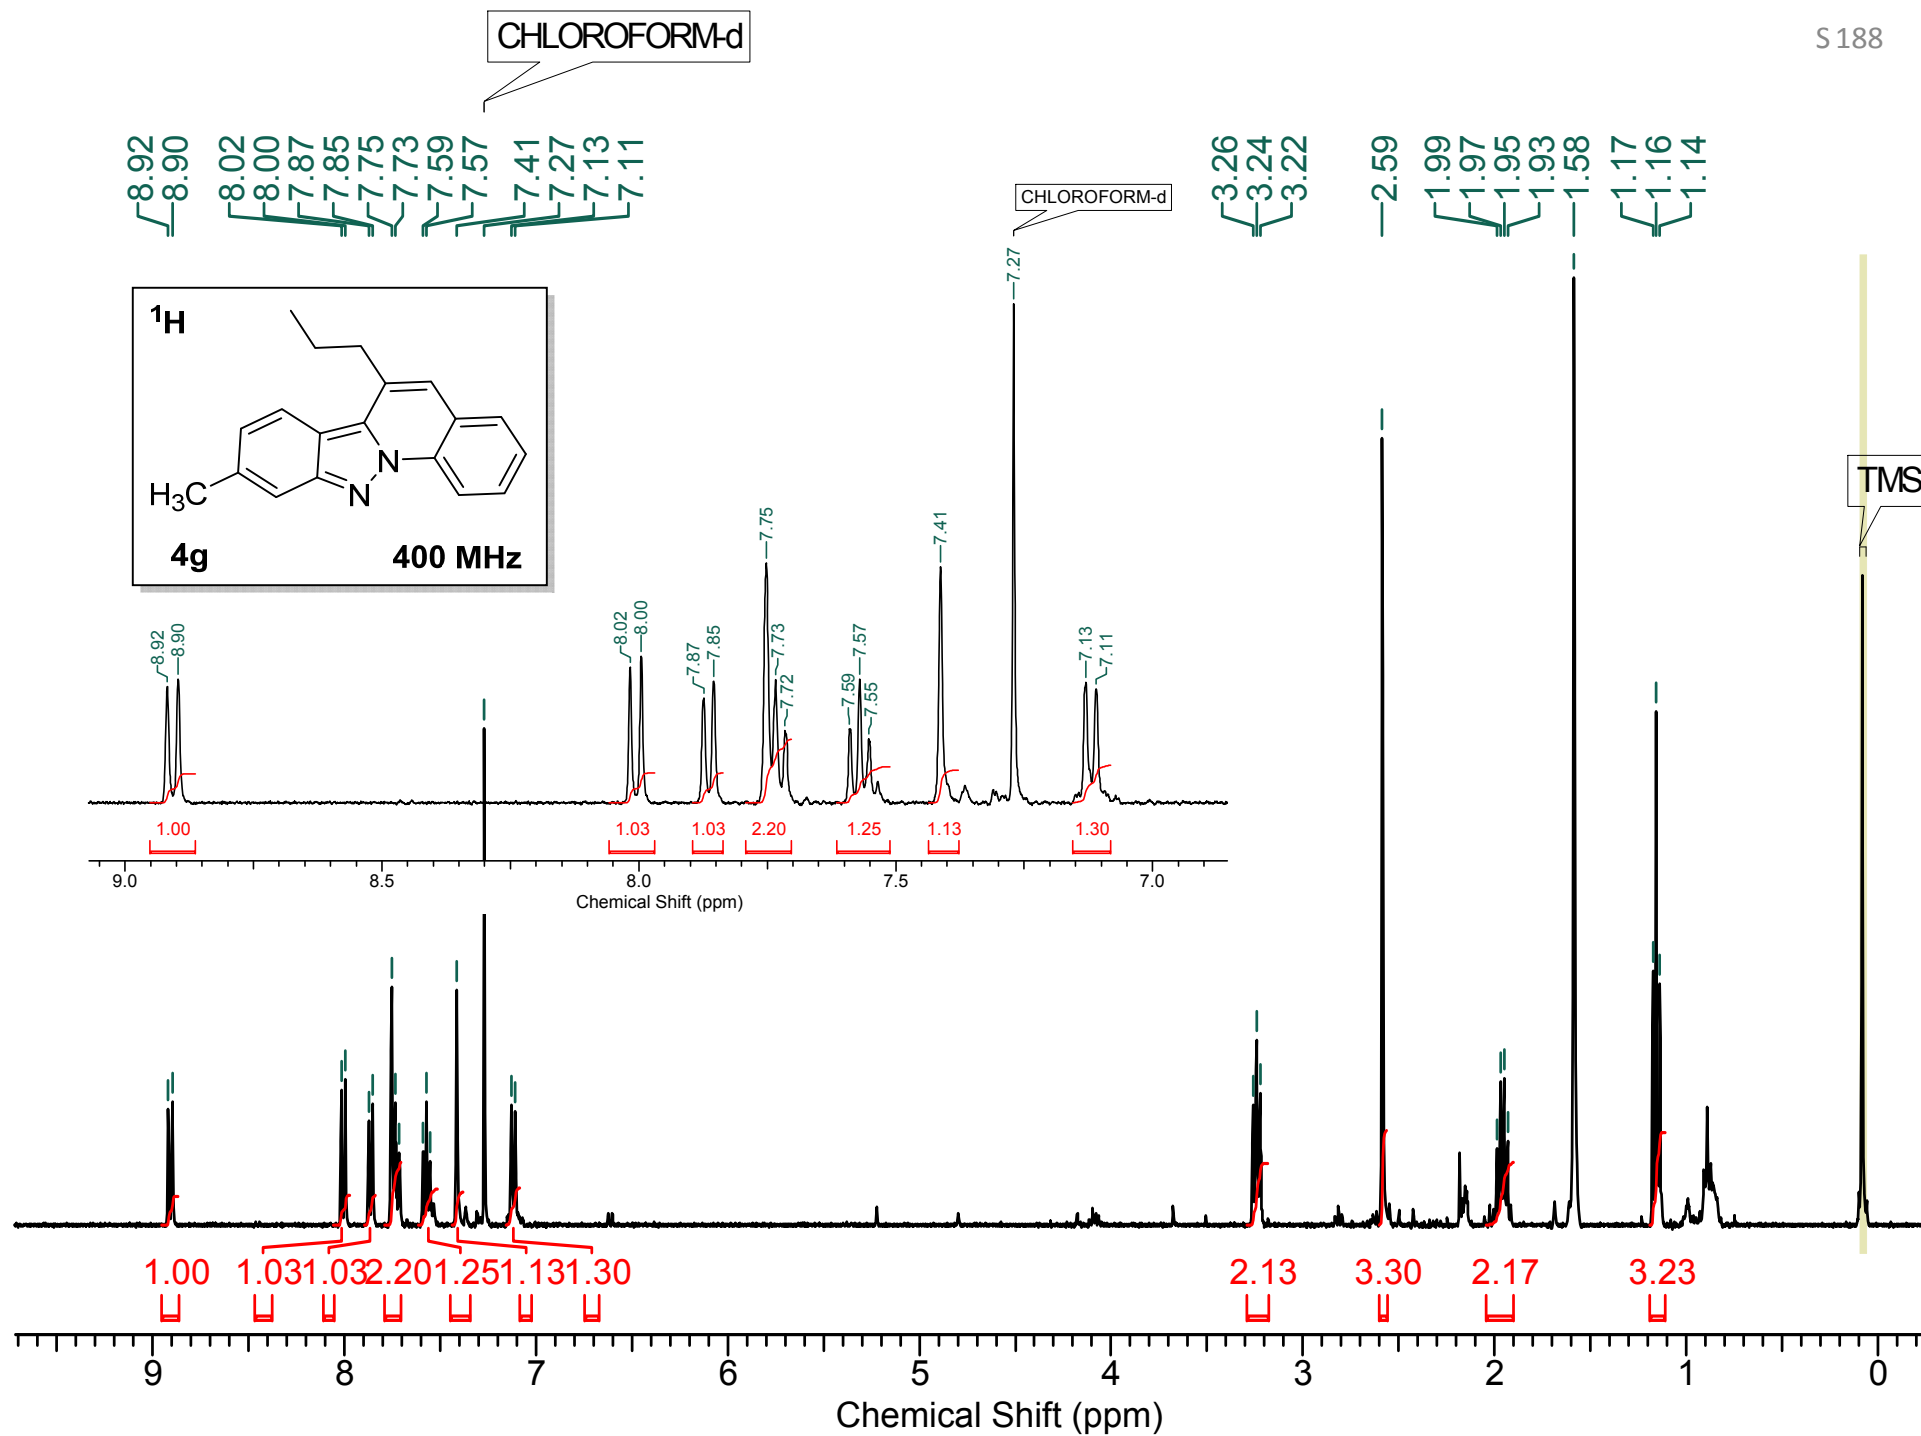

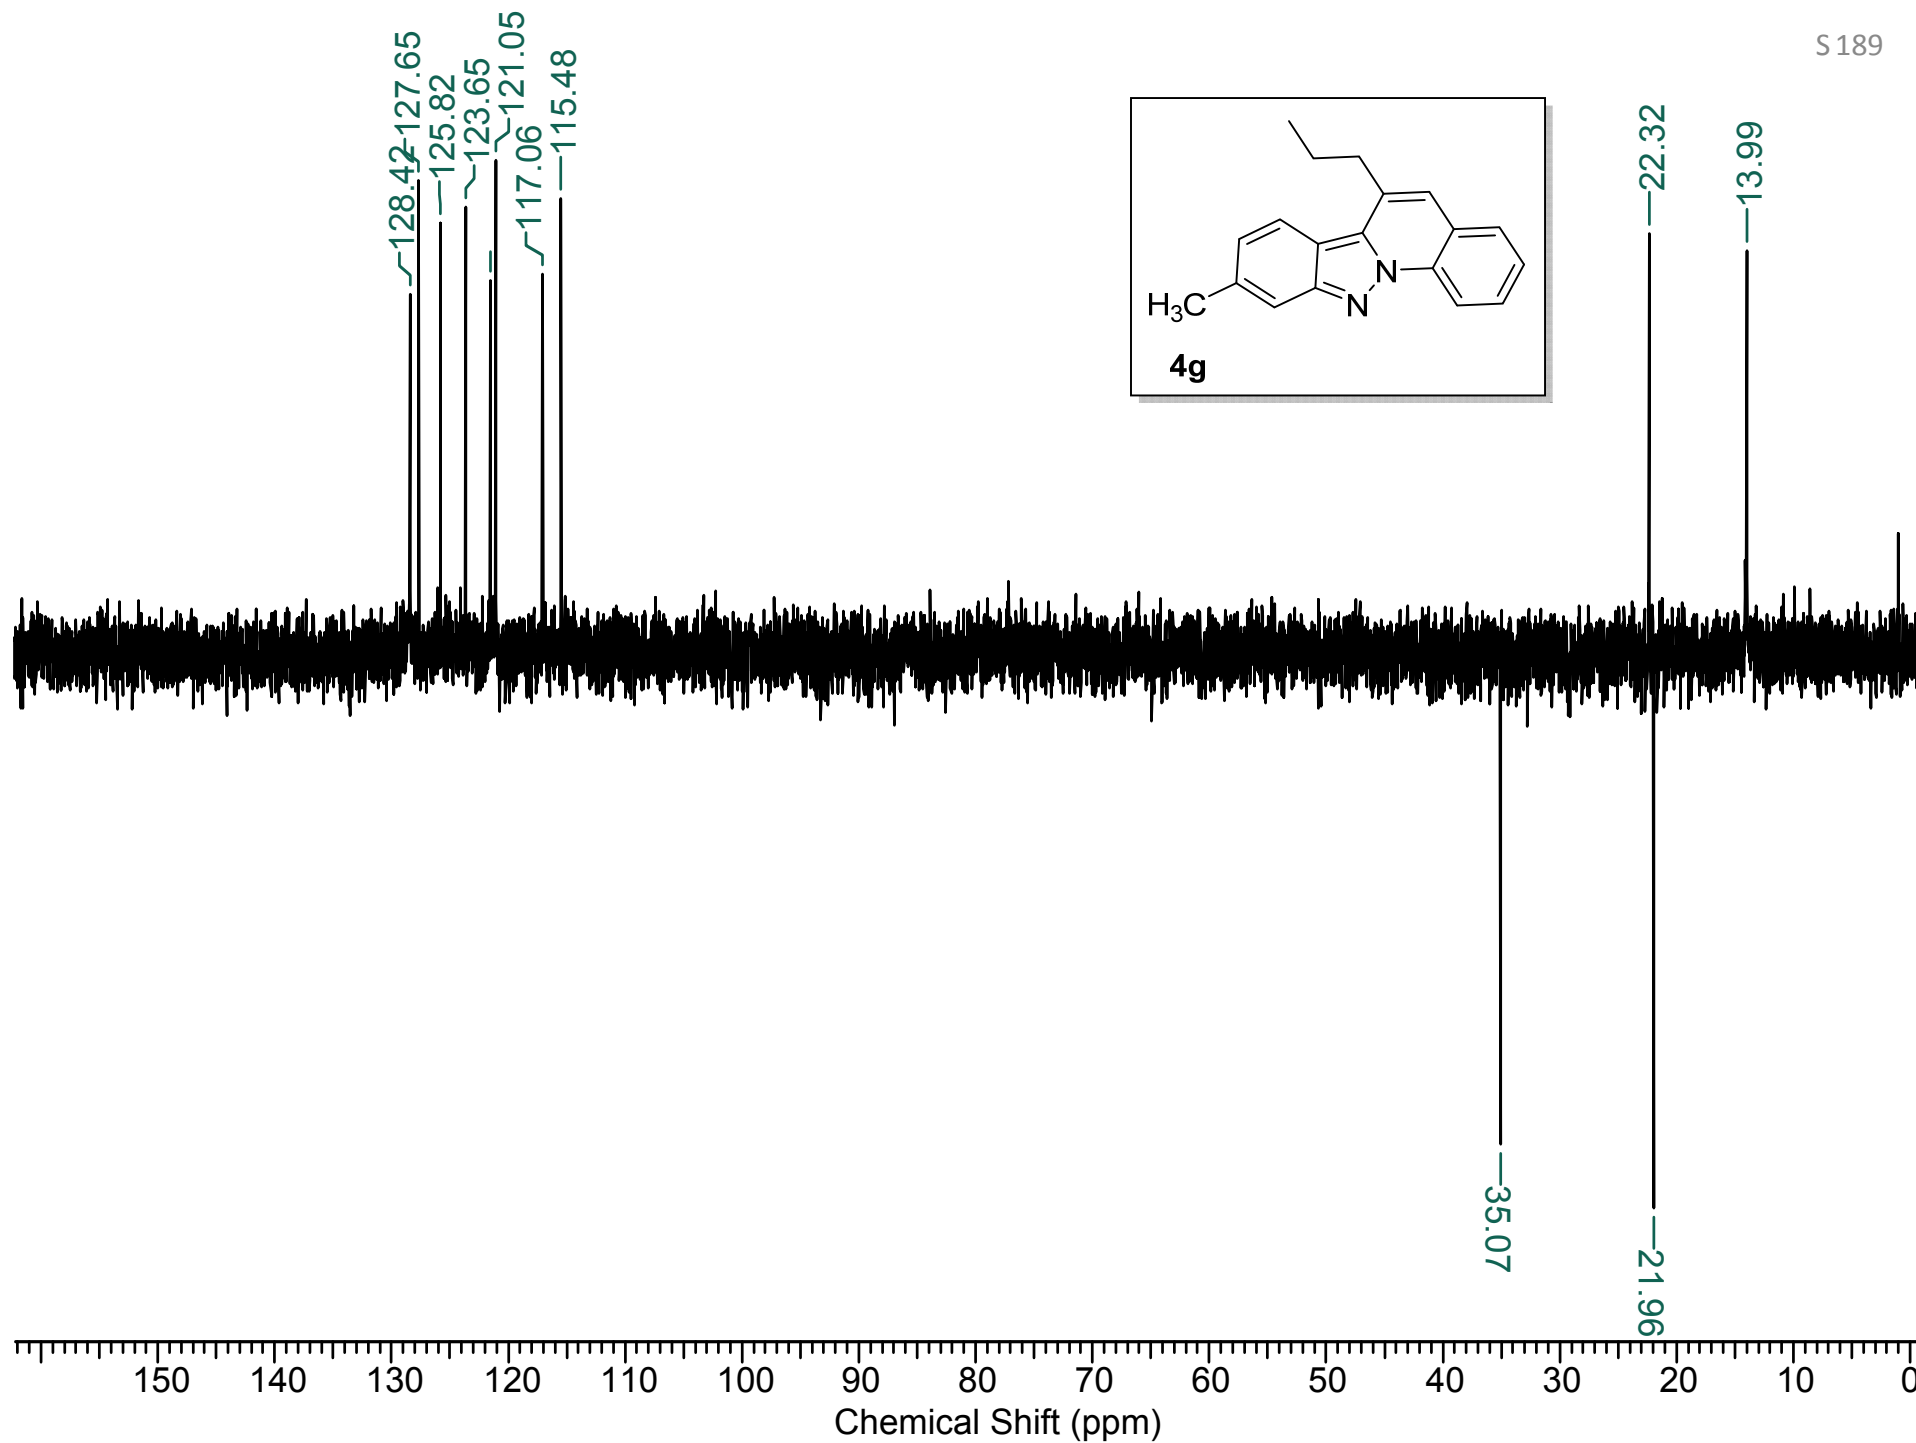

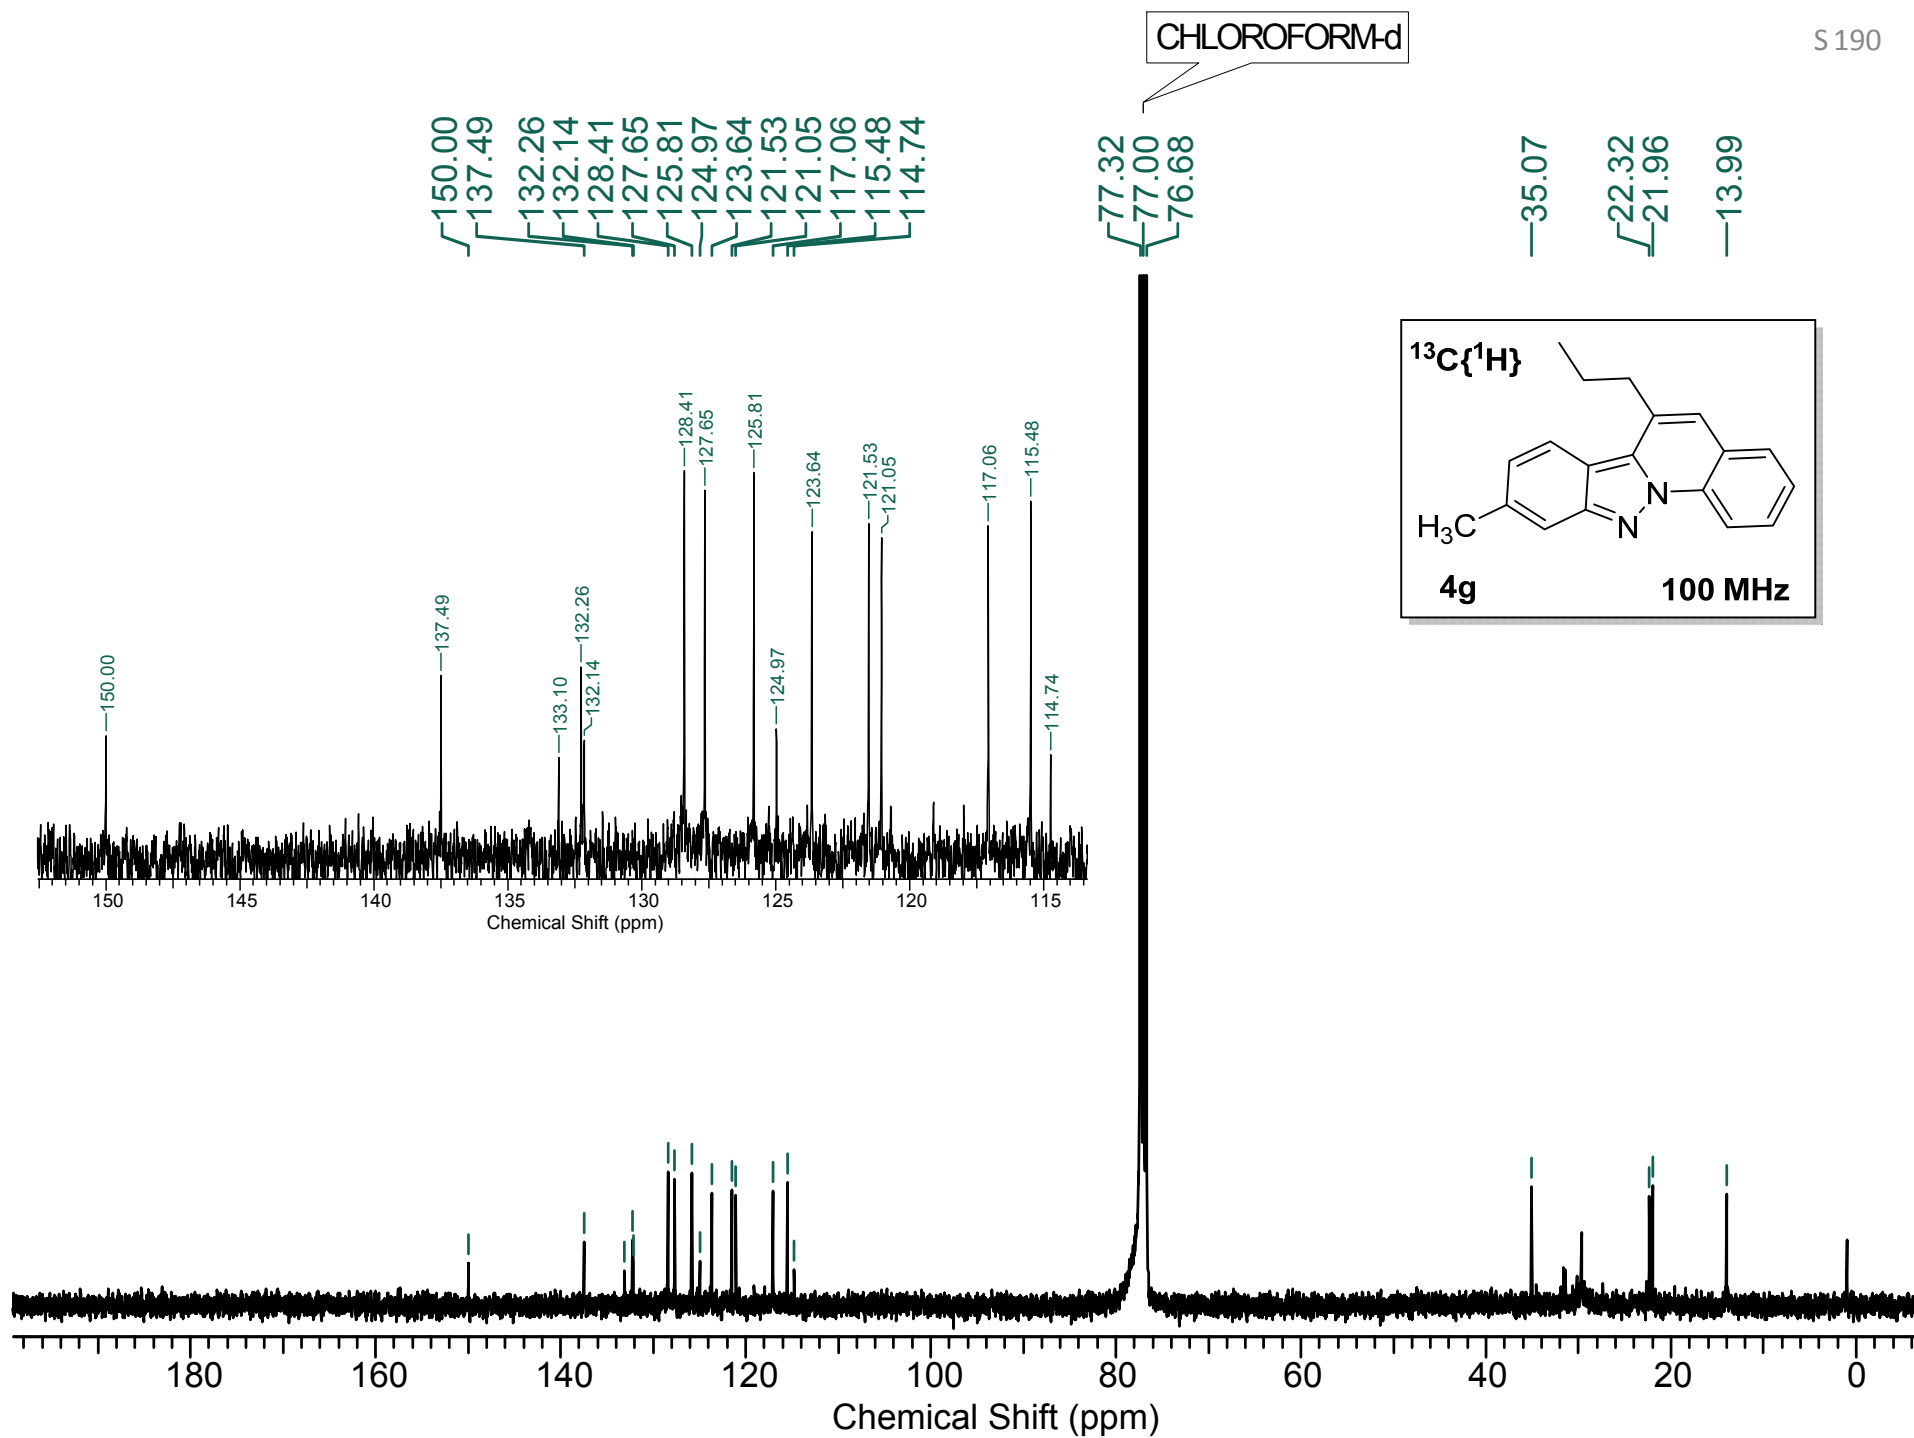

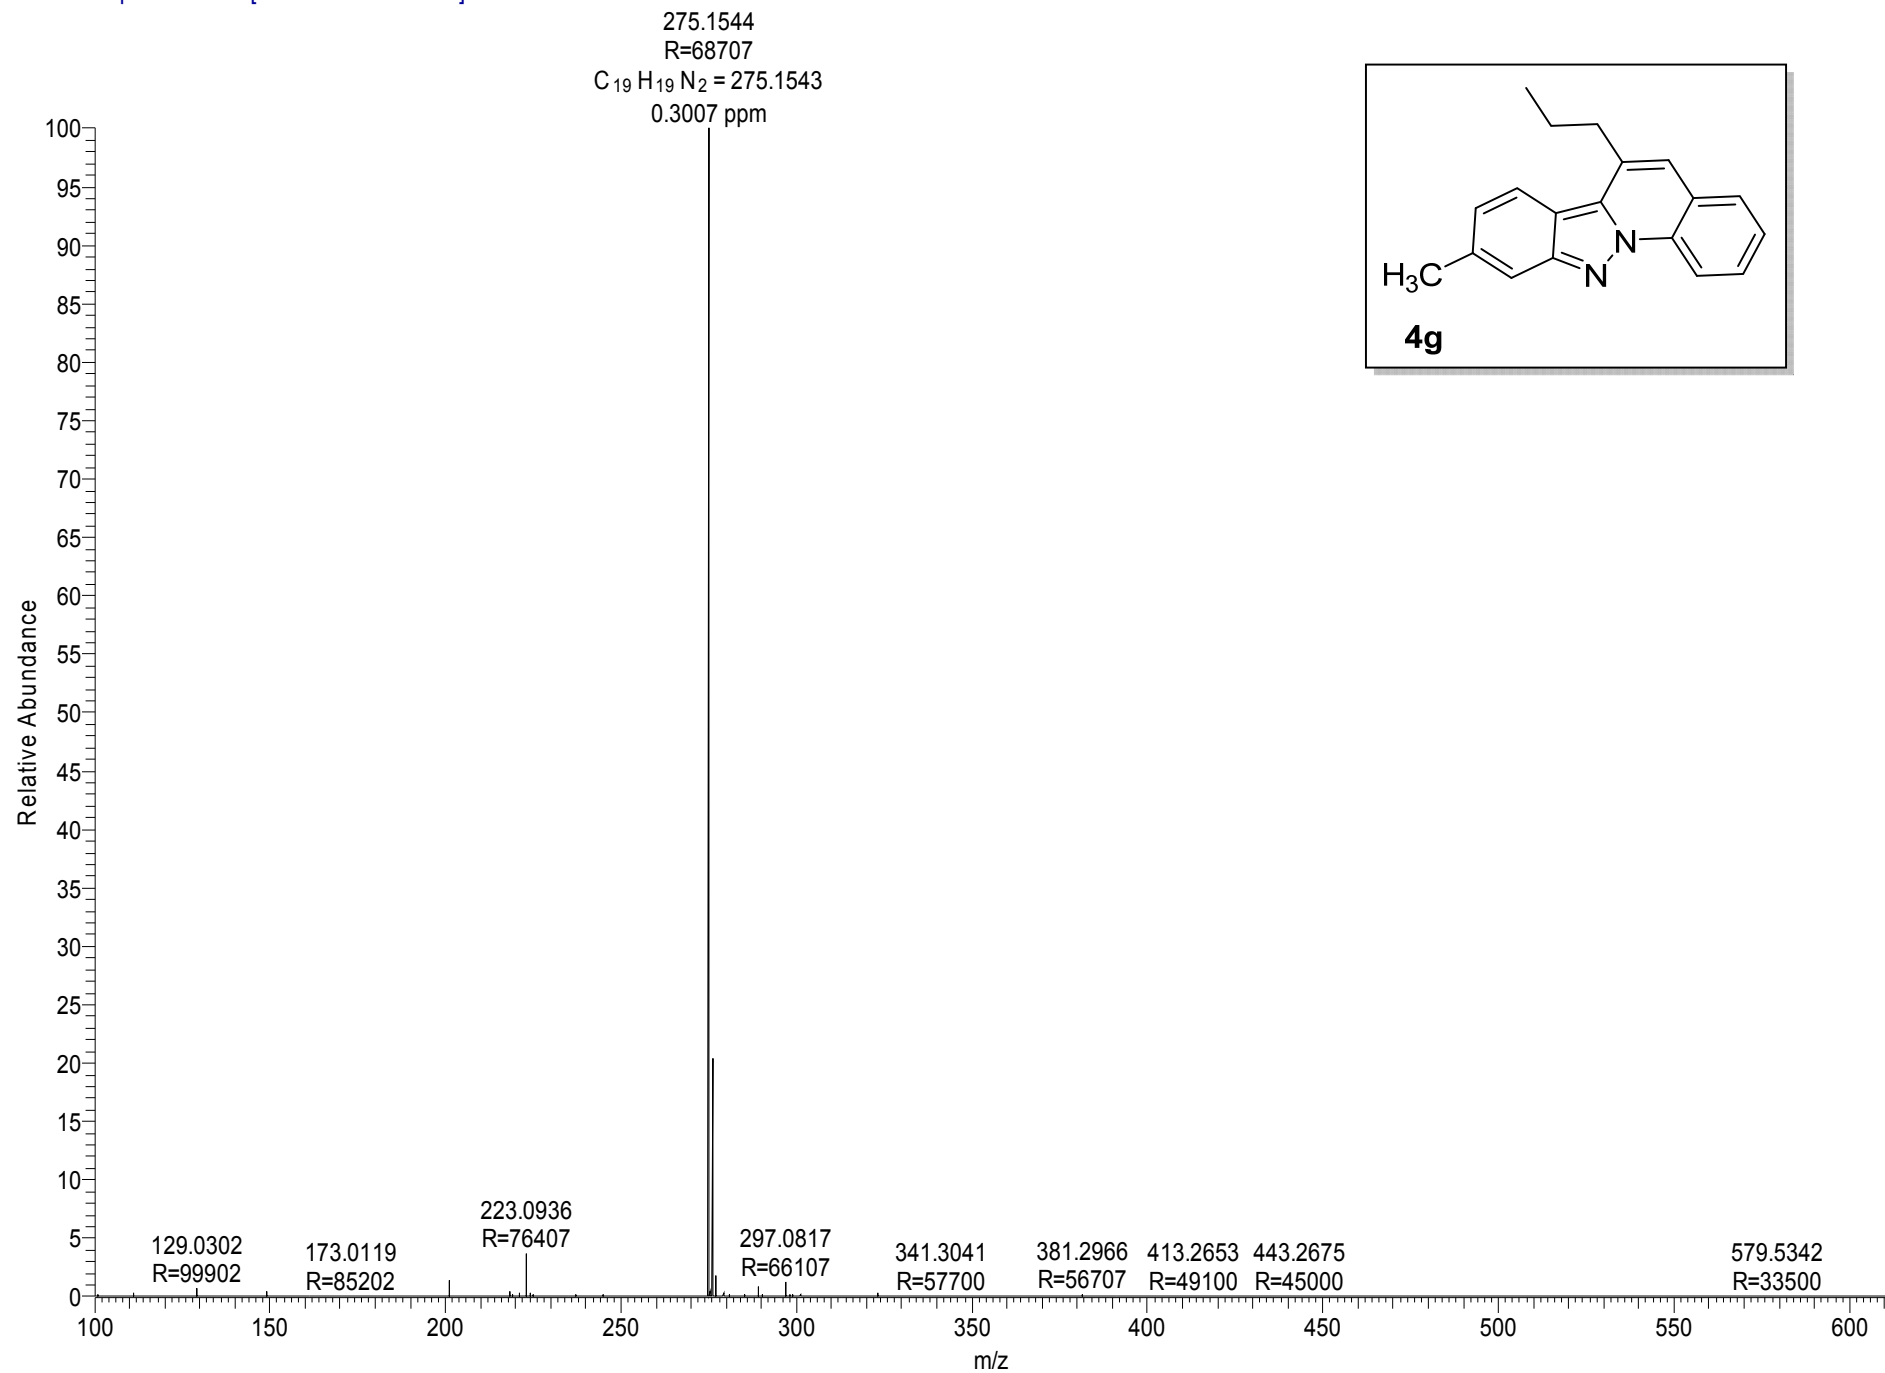

275.1544  
R=68707  
C<sub>19</sub> H<sub>19</sub> N<sub>2</sub> = 275.1543  
0.3007 ppm

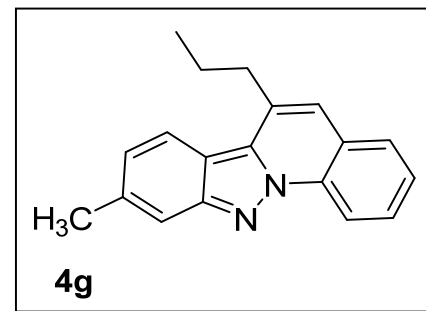

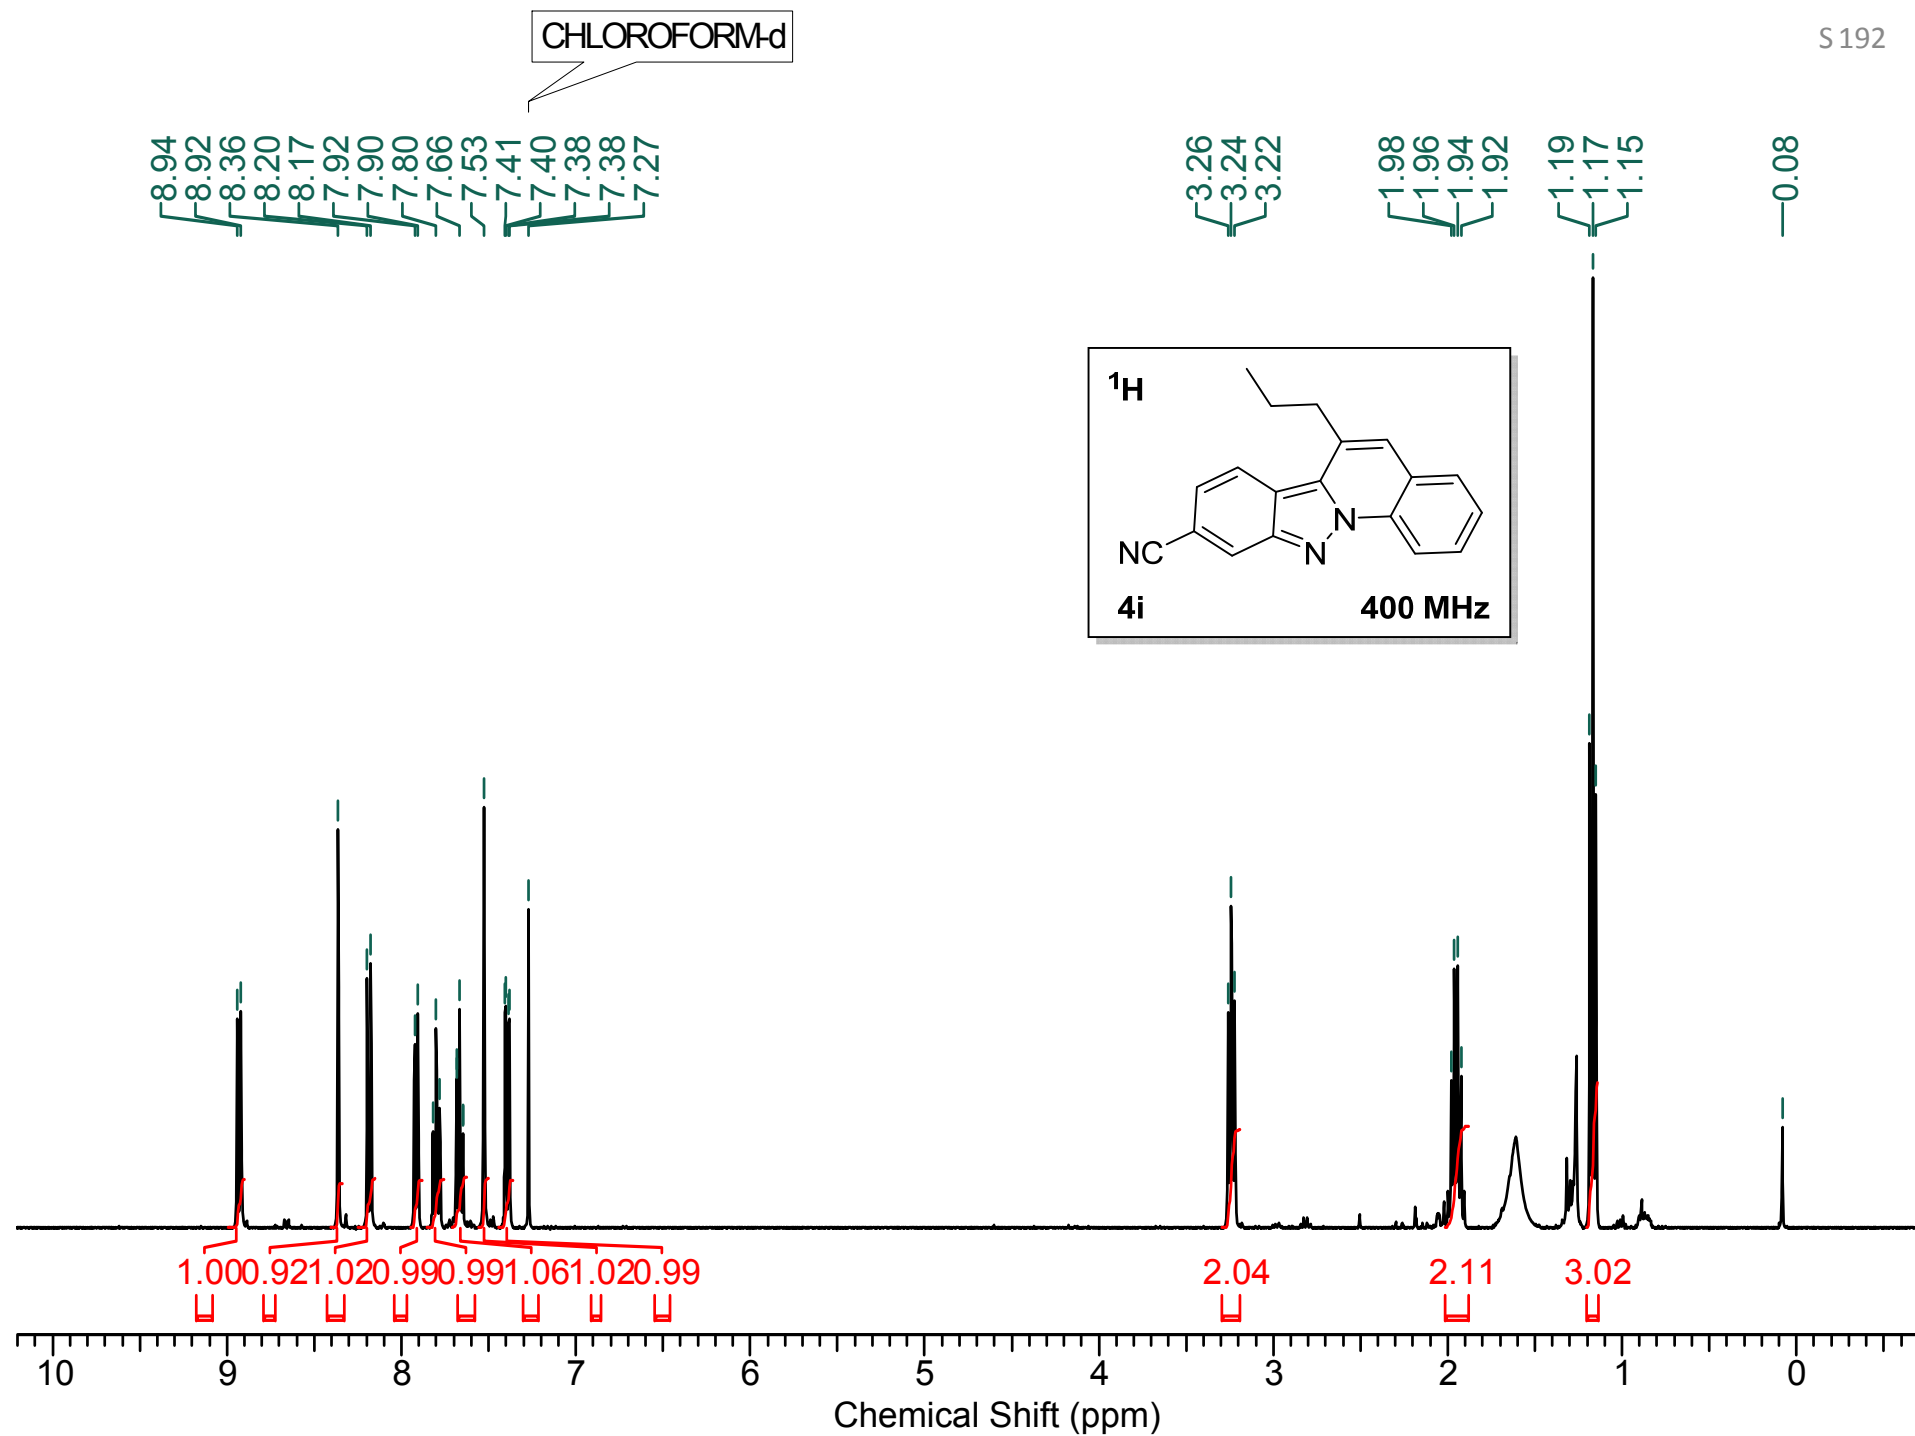



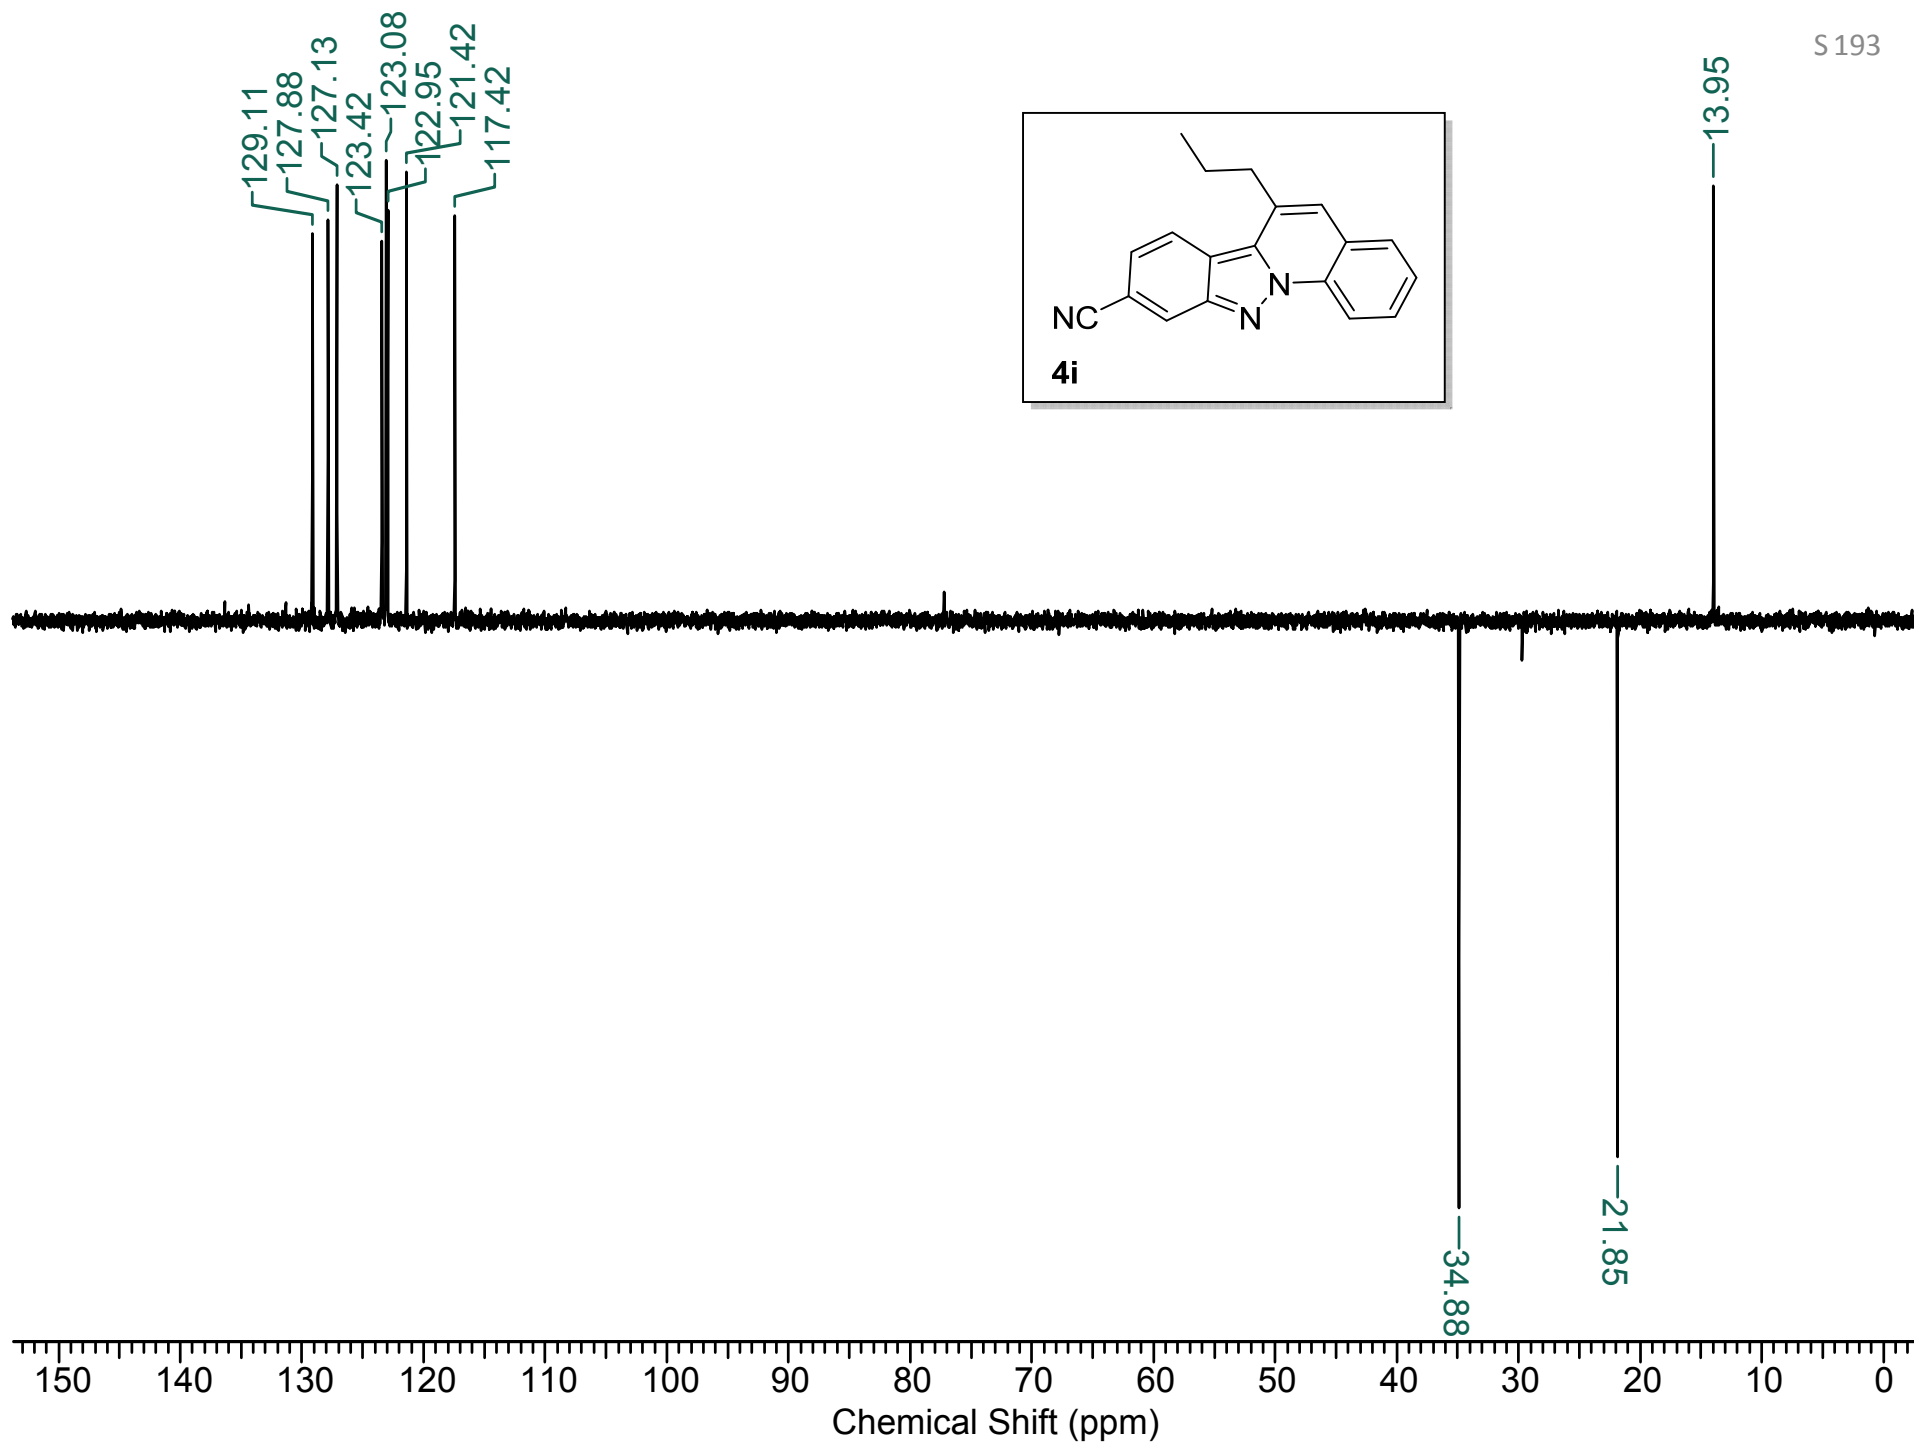

CHLOROFORM-d

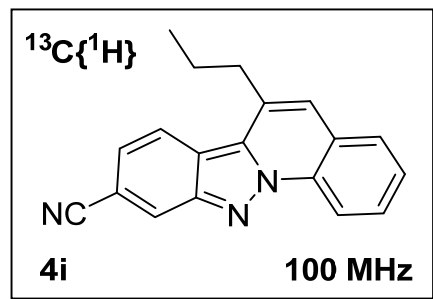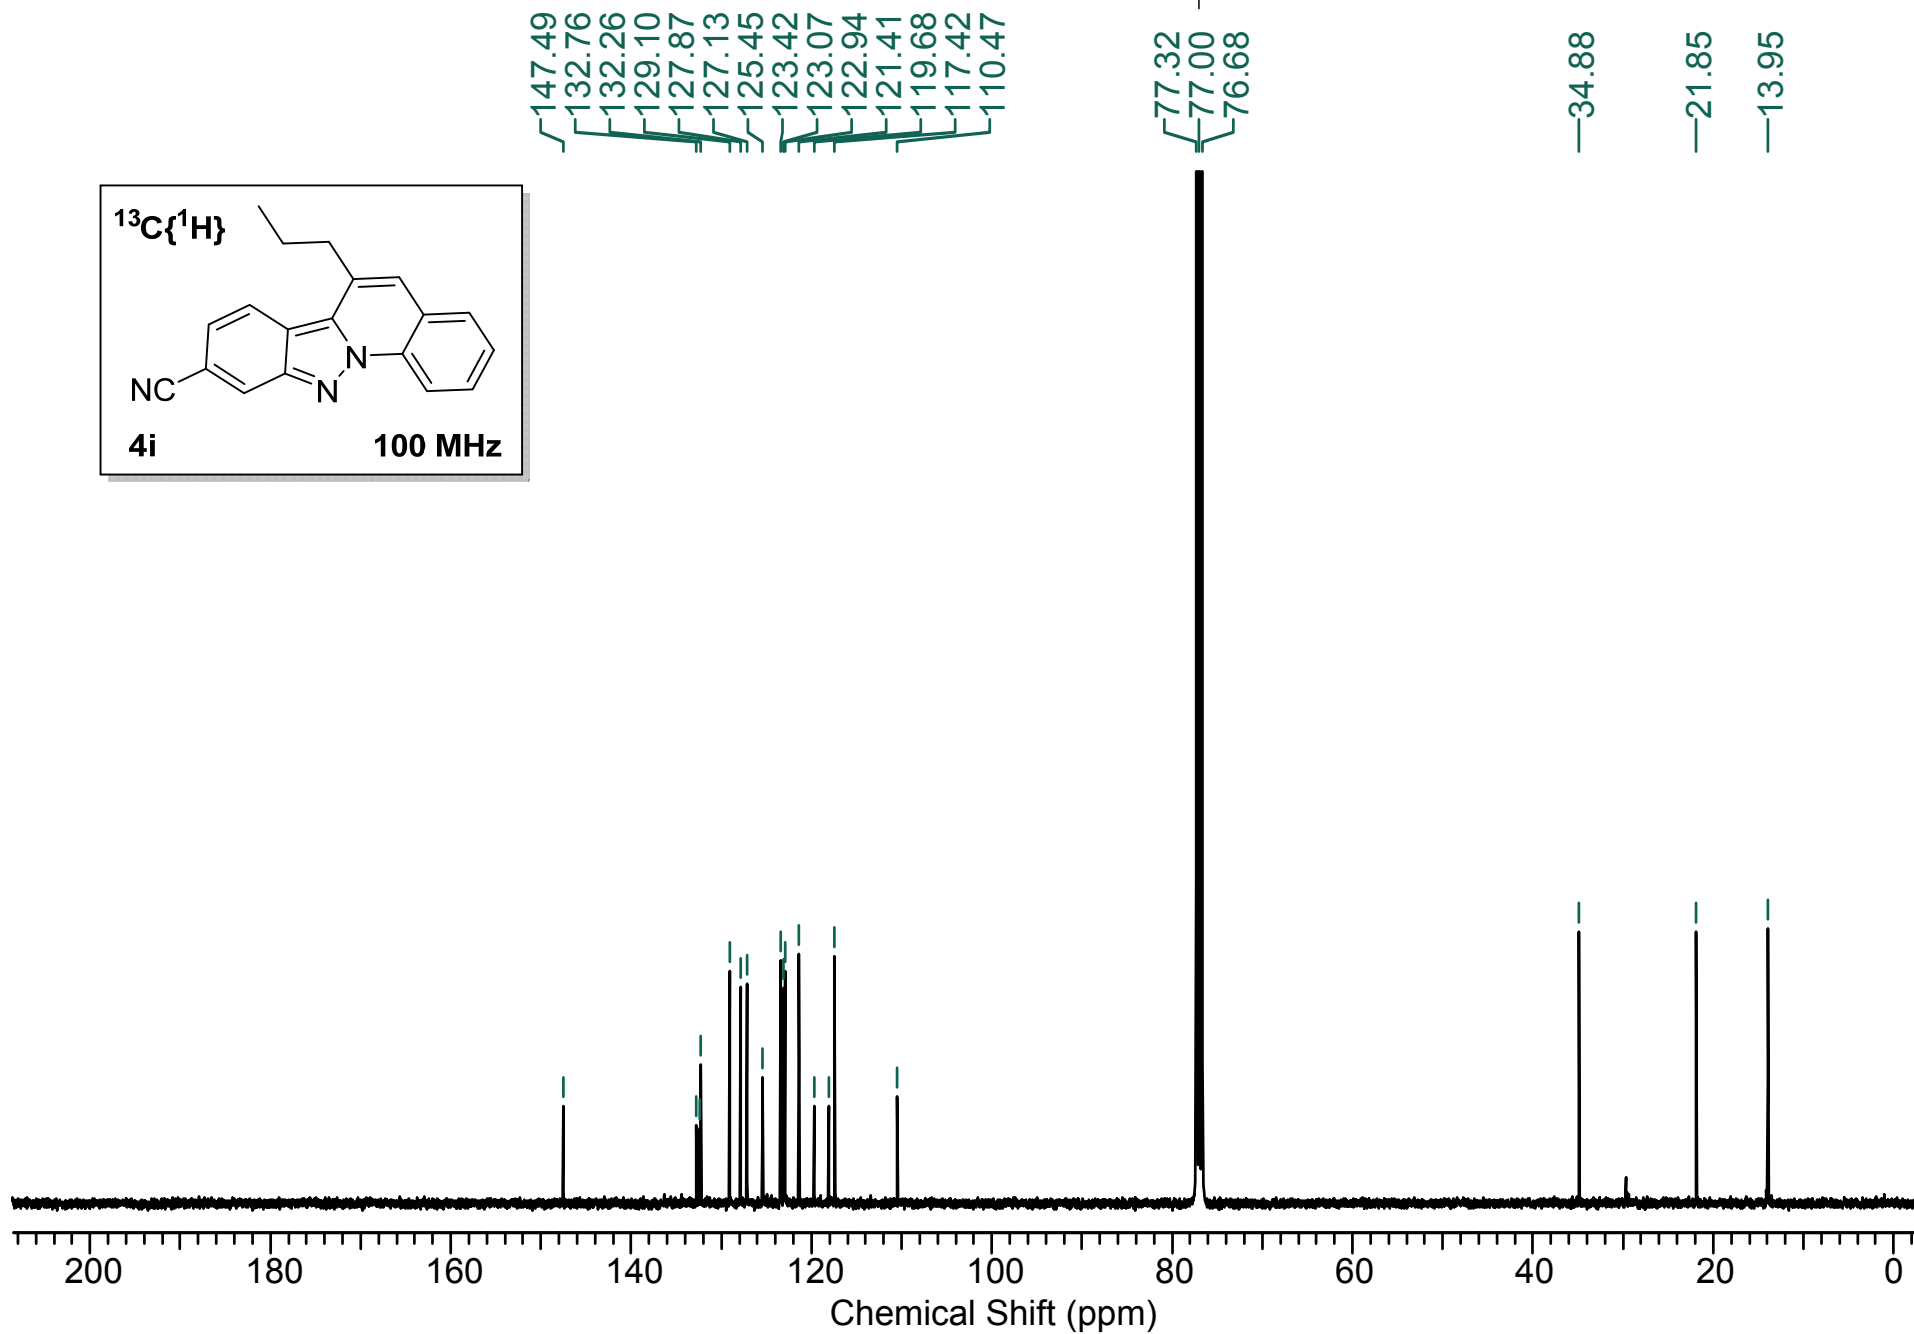

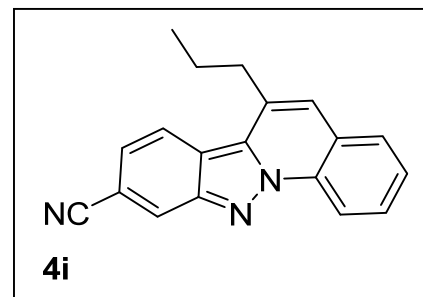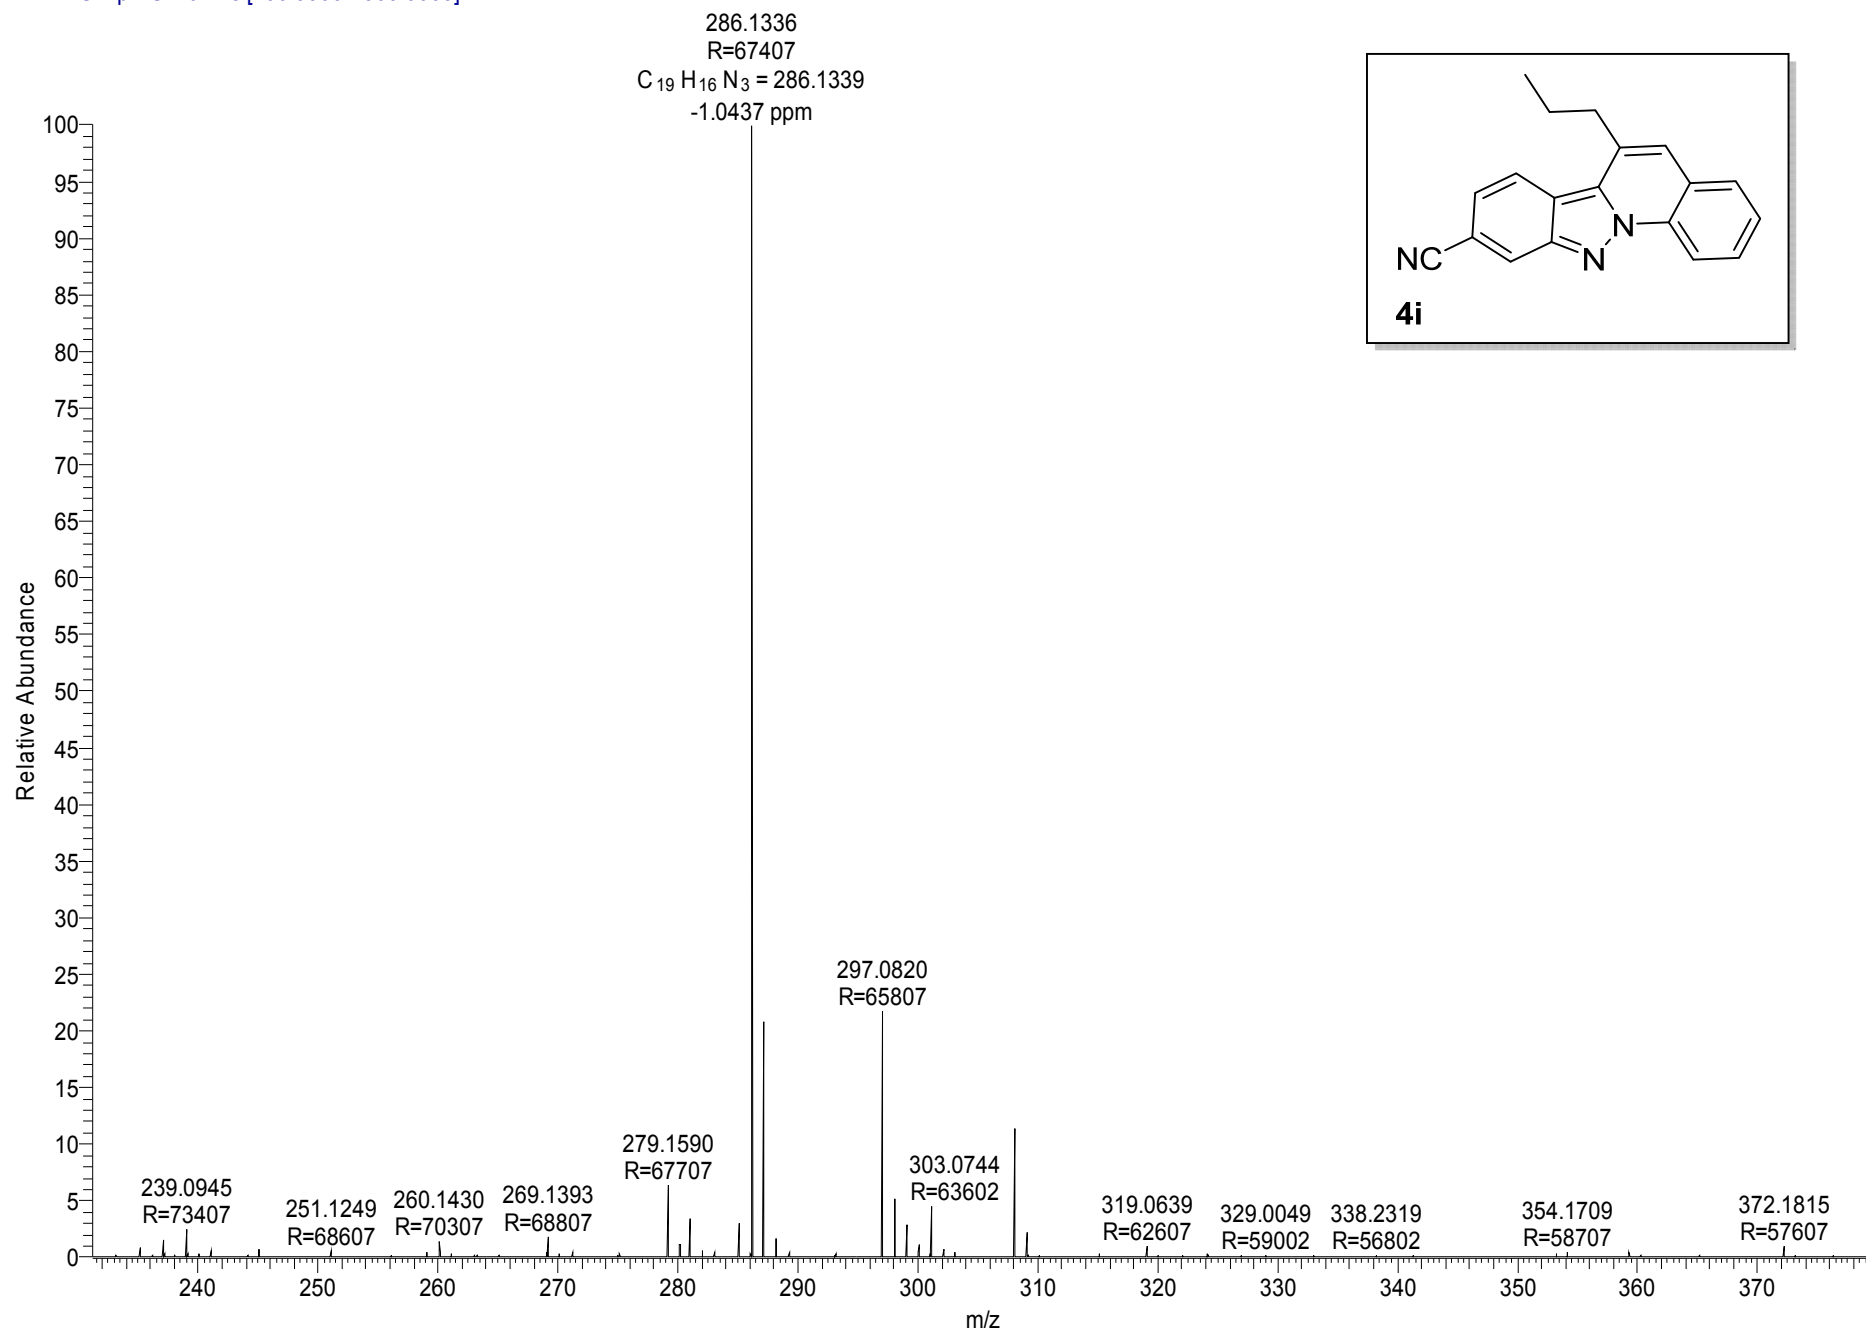

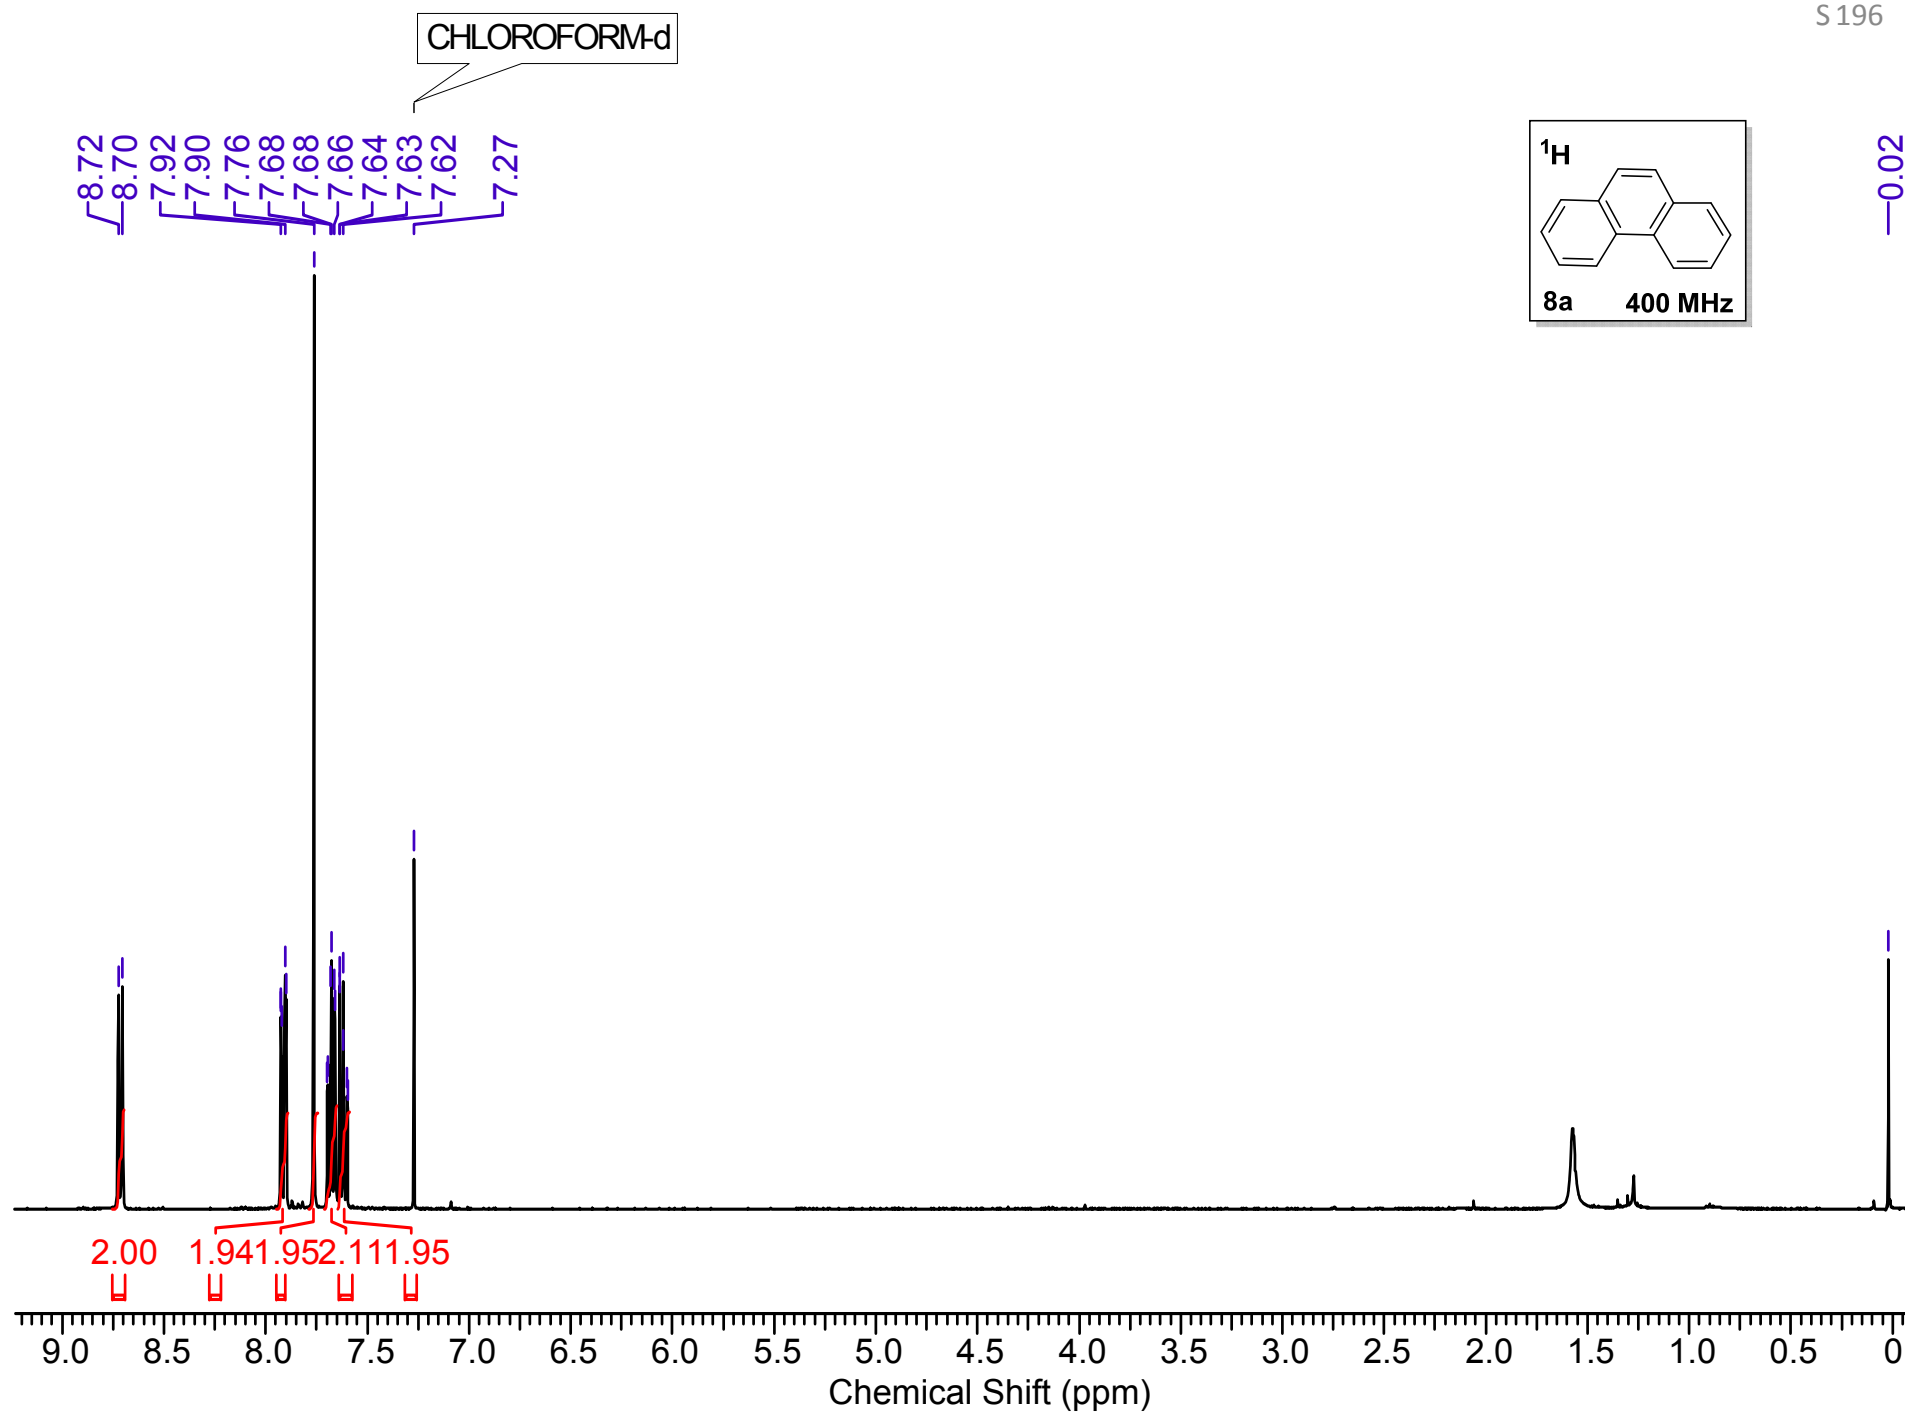

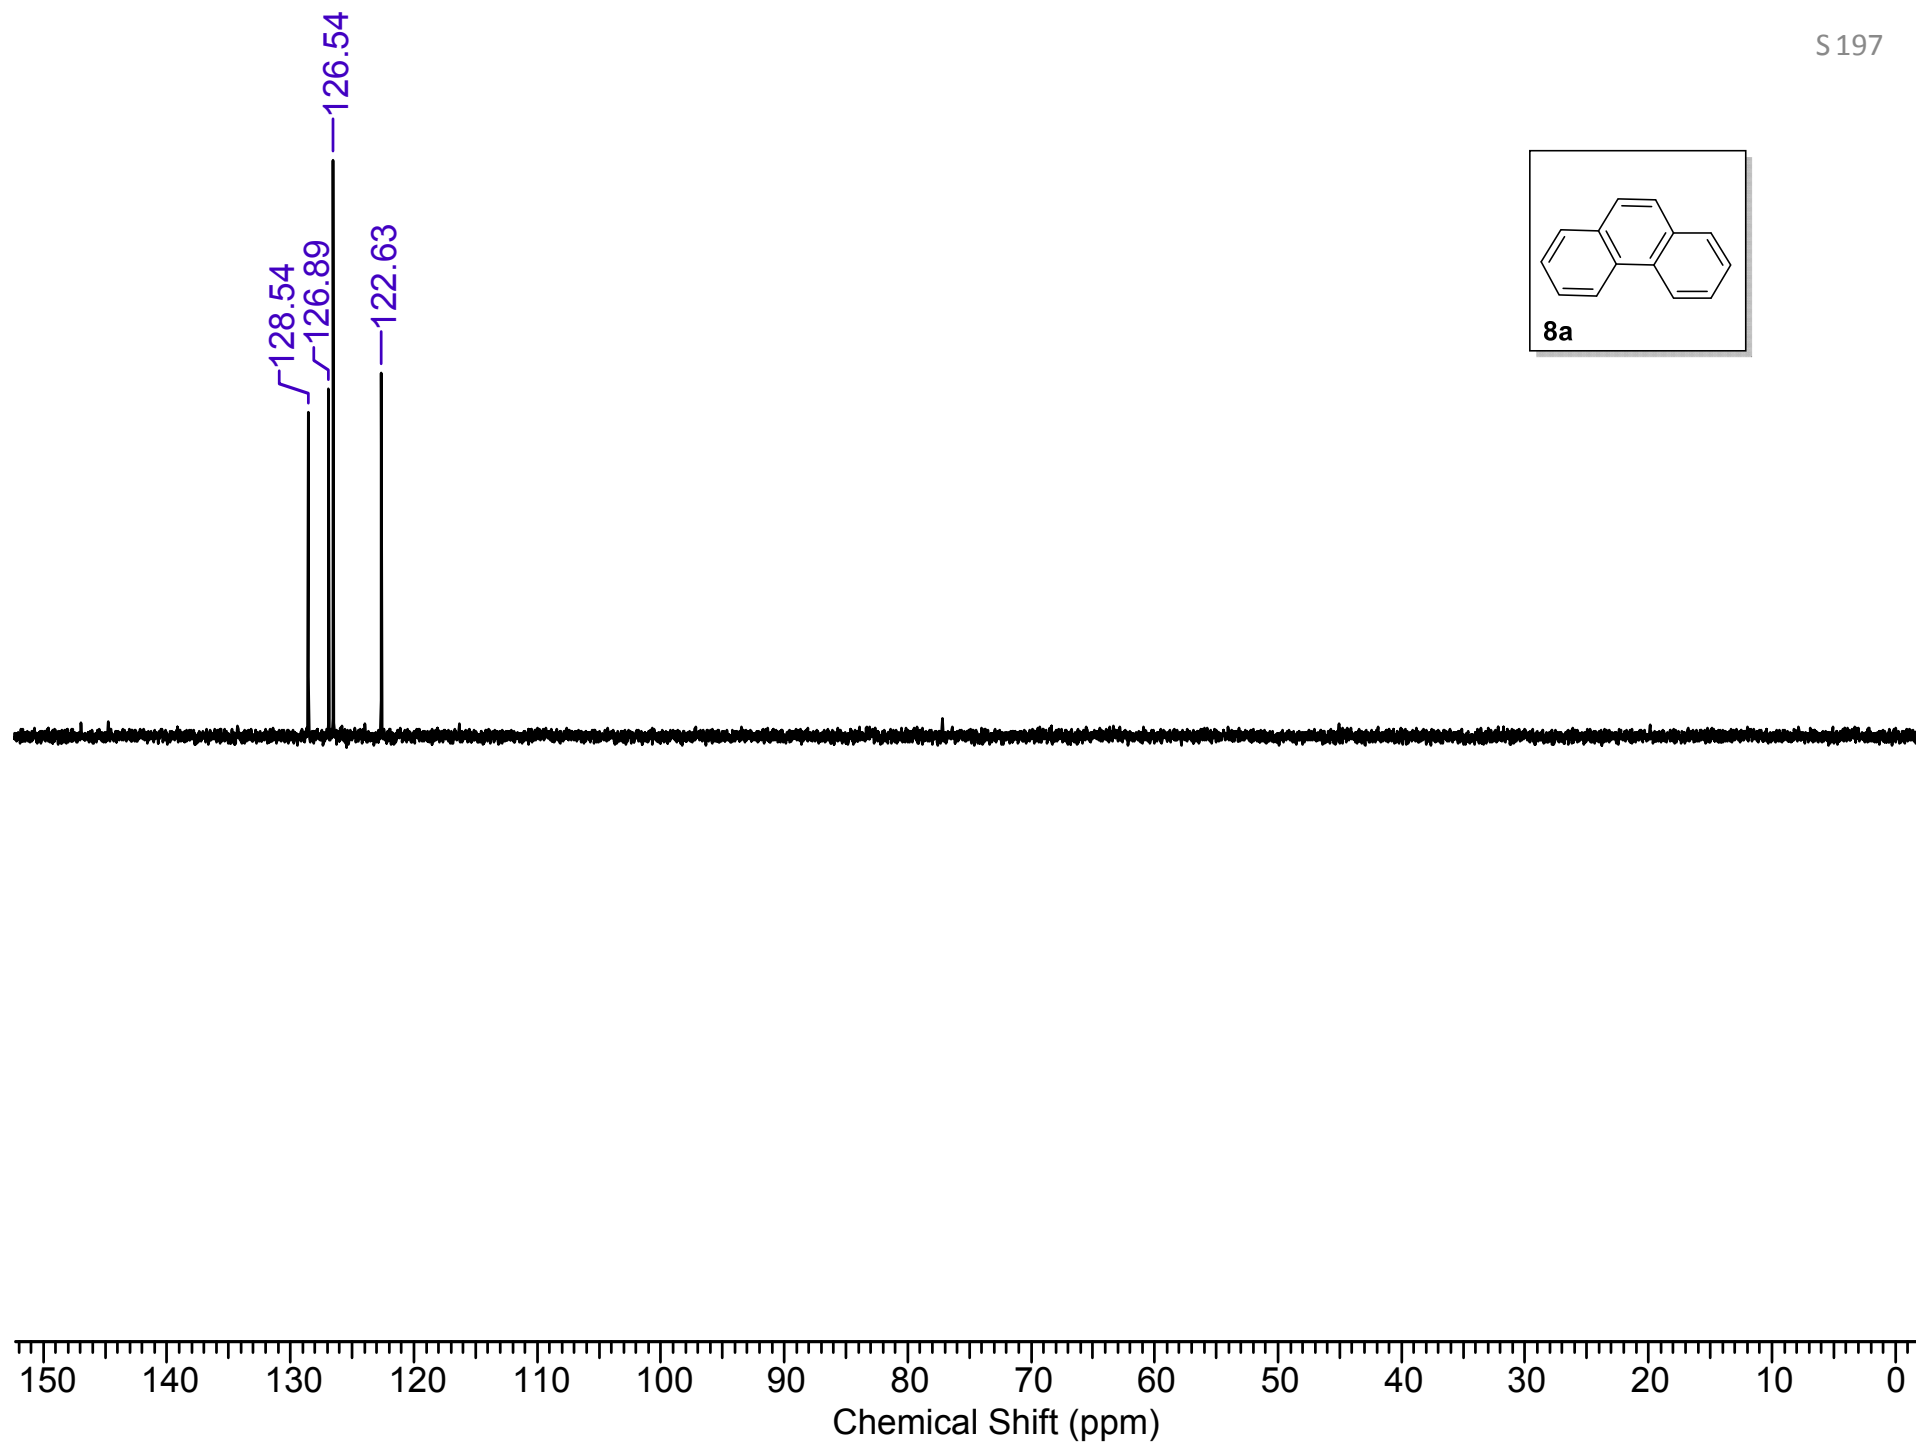

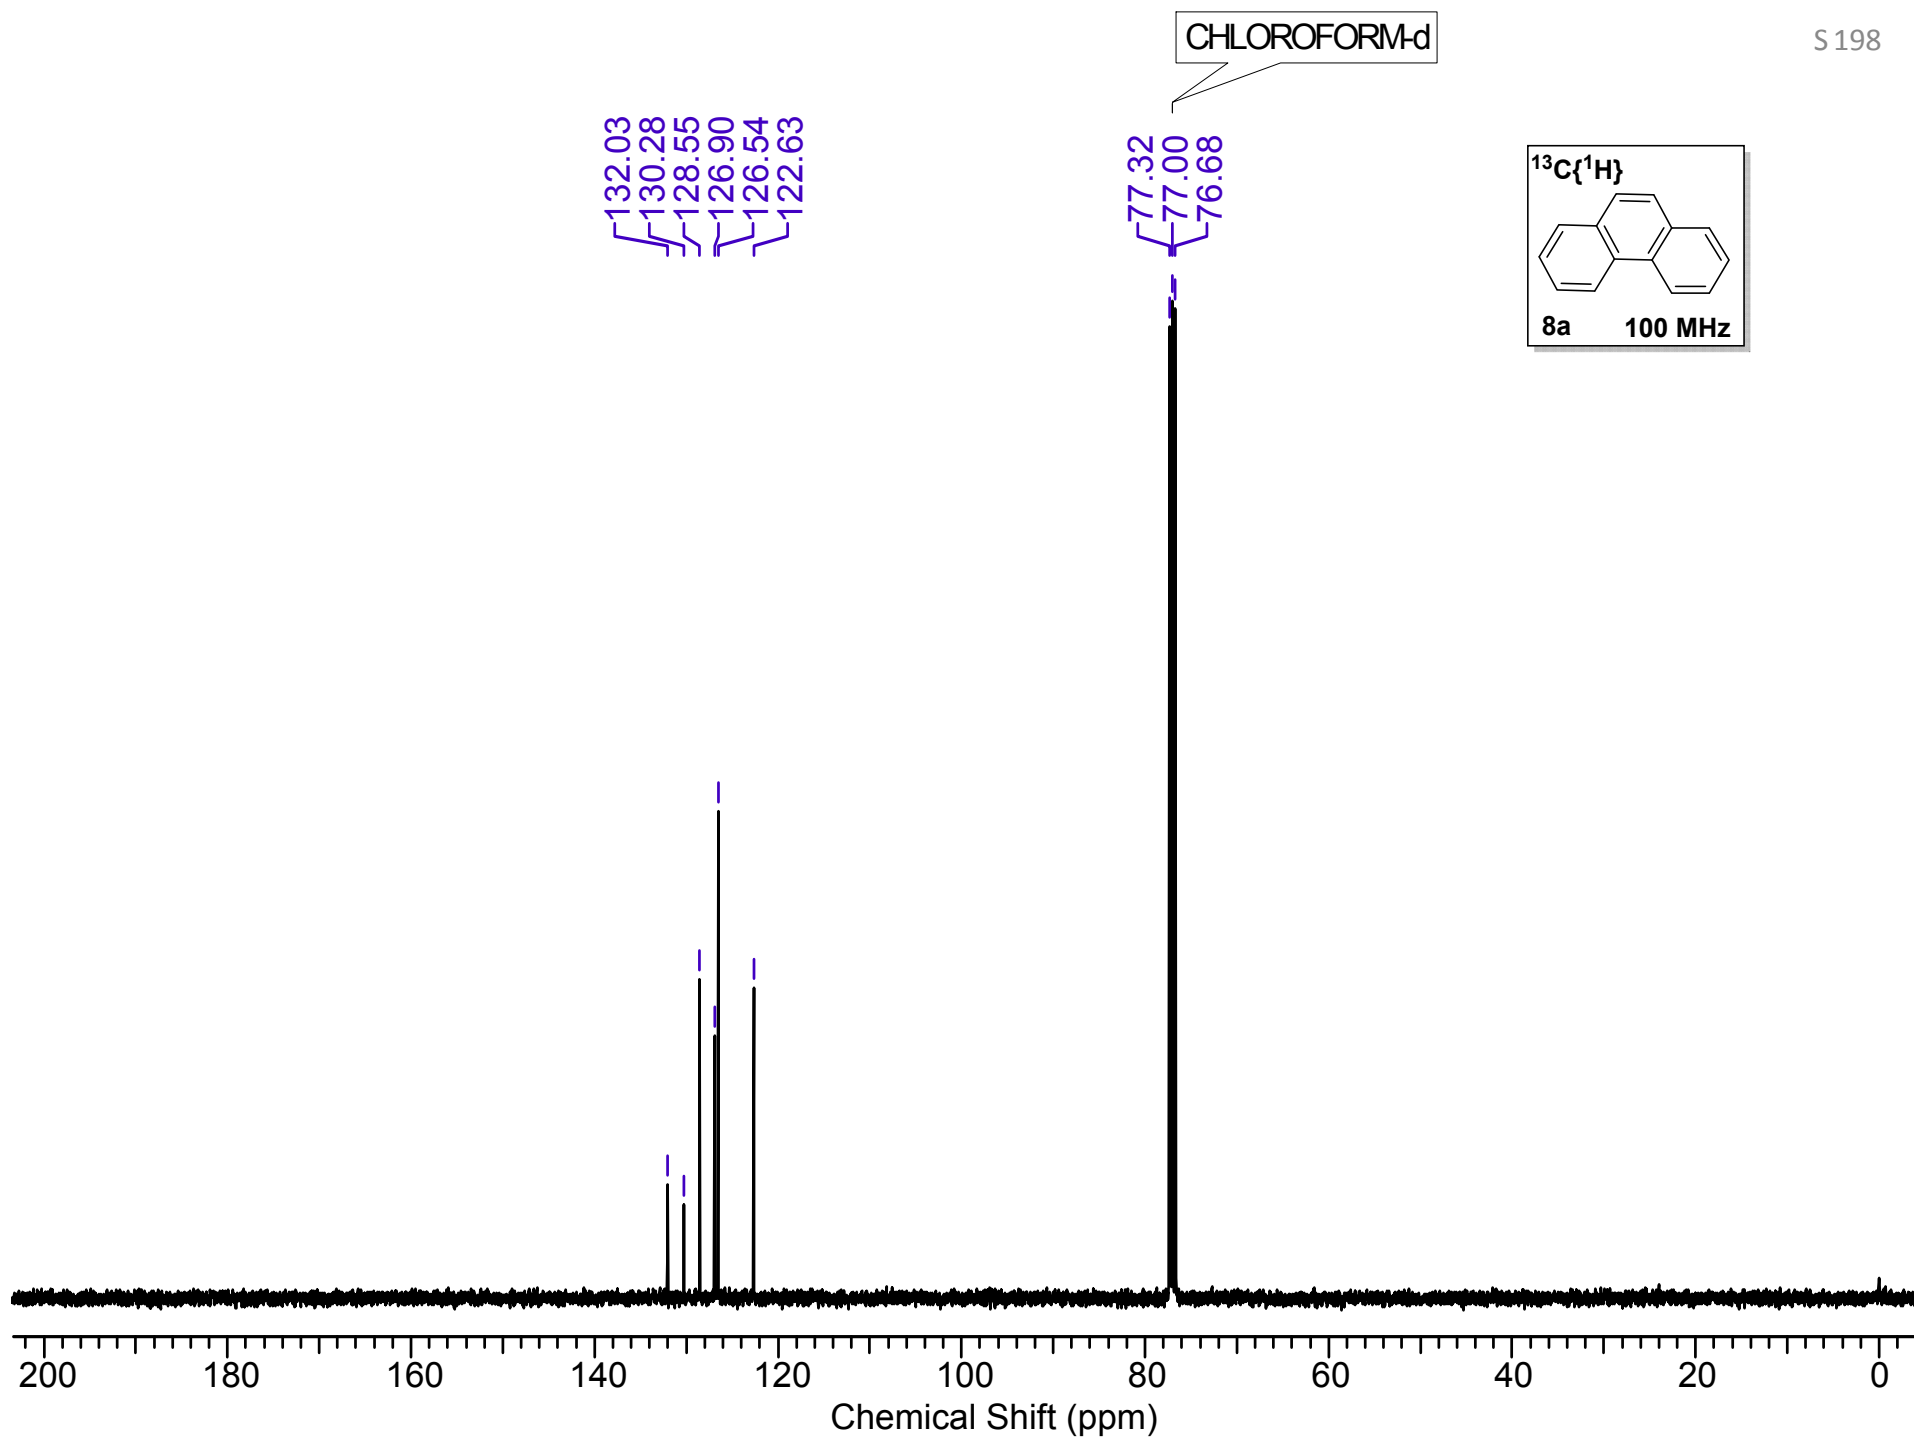

CHLOROFORM-d

Water

S 199

8.75  
8.73  
8.68  
8.66  
8.09  
8.07  
7.82  
7.68  
7.67  
7.67  
7.61  
7.60  
7.60  
7.59  
7.27

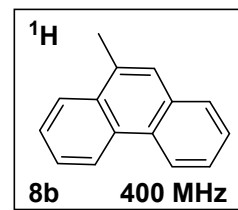

2.76

1.55

0.02

1.06  
1.06  
1.00  
1.01  
1.93  
3.17

3.13

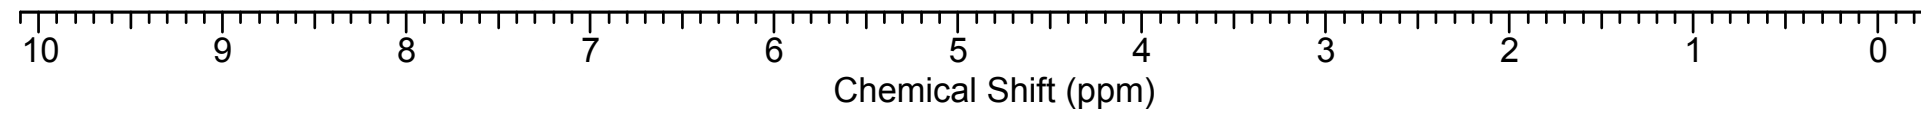

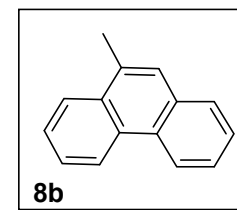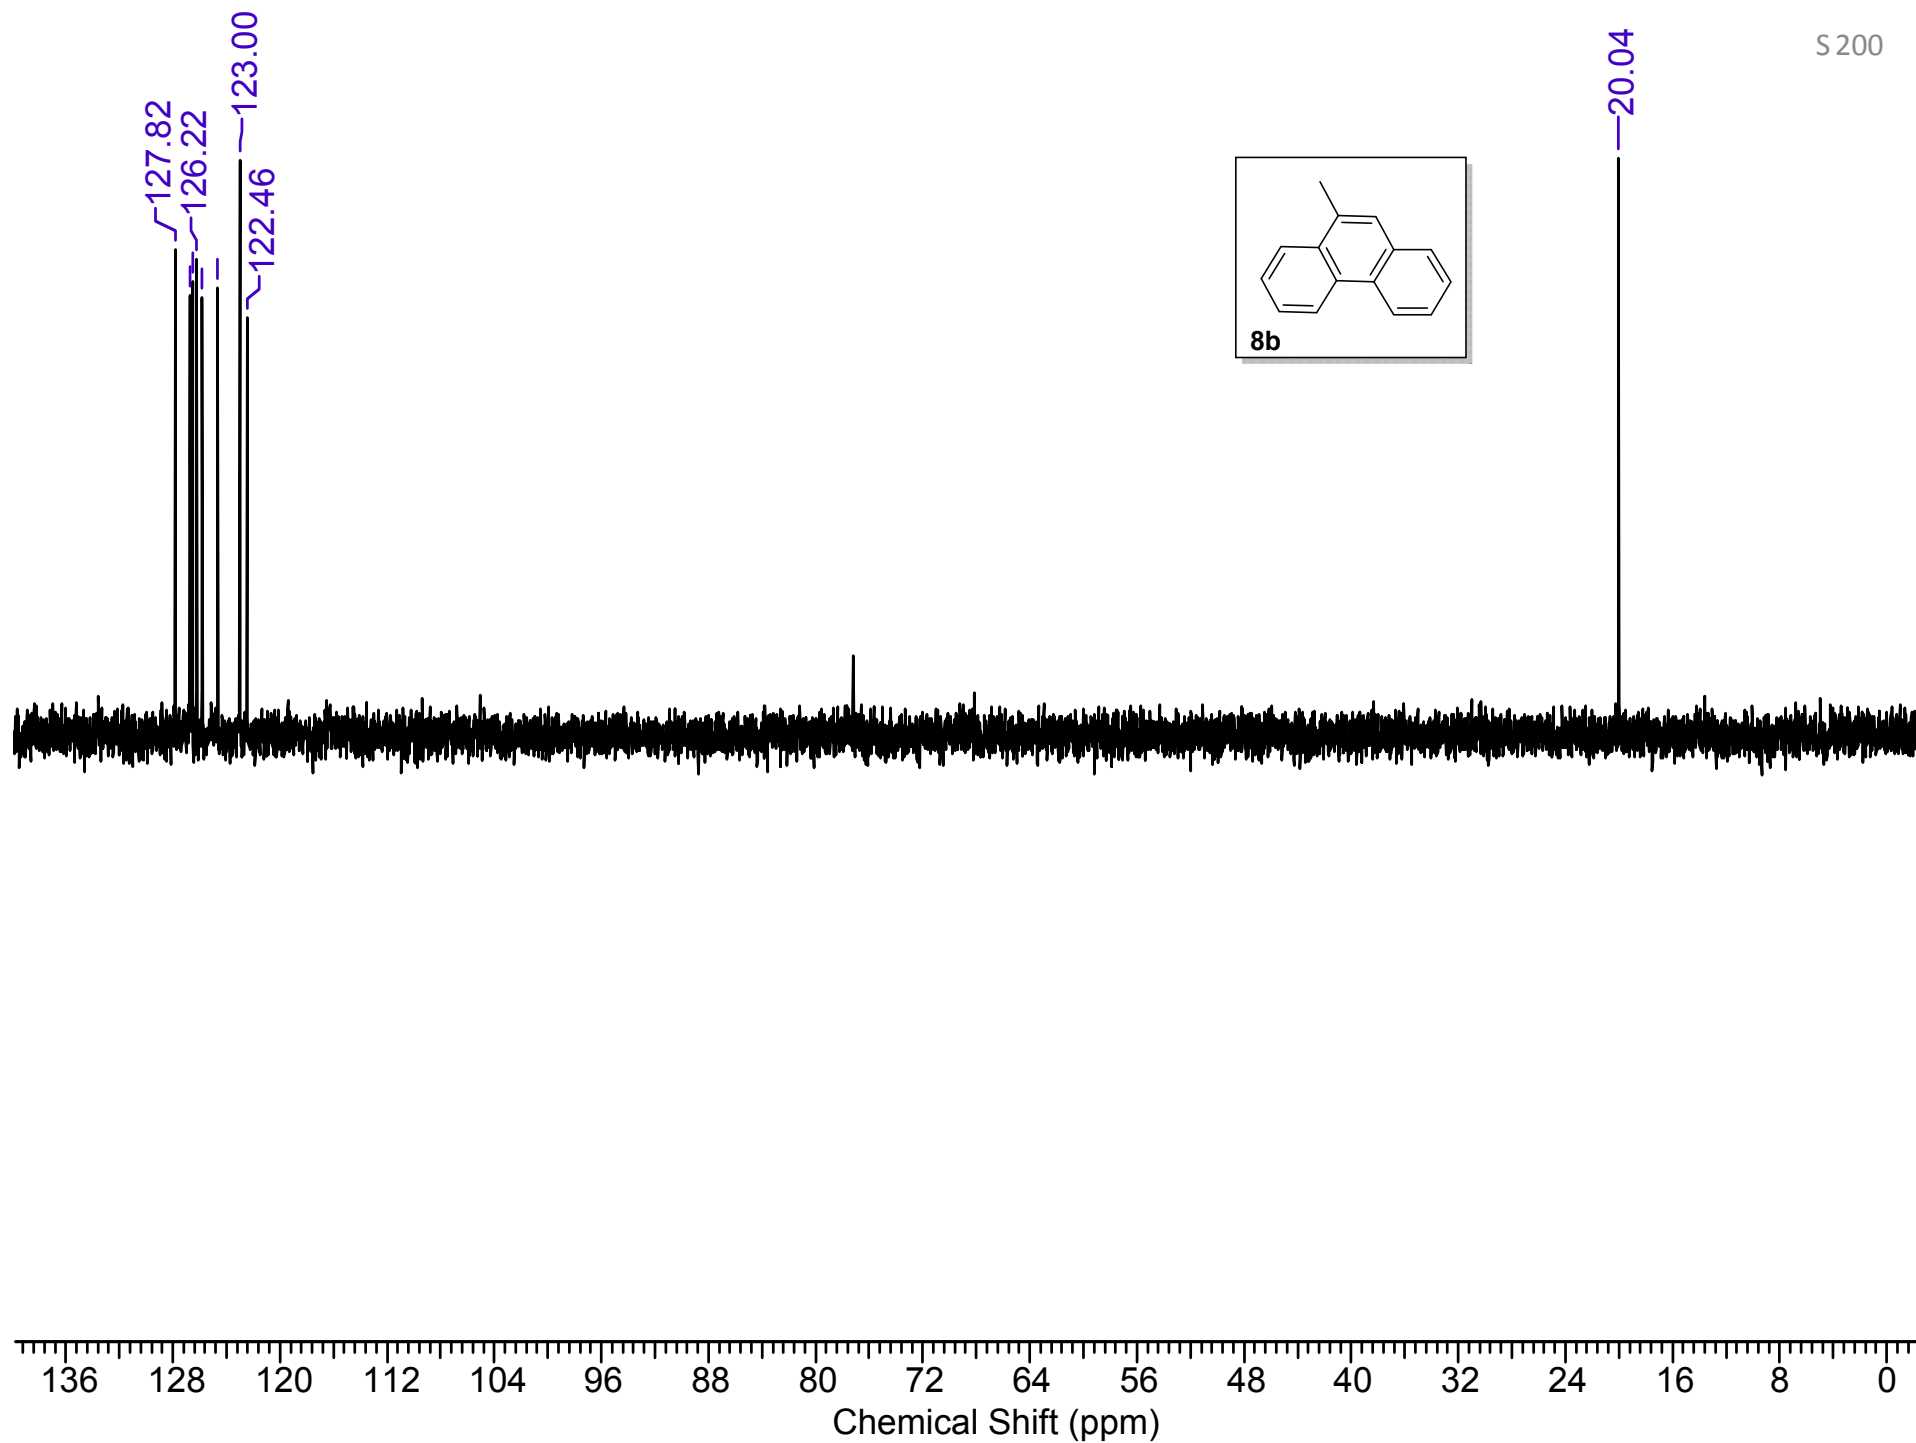



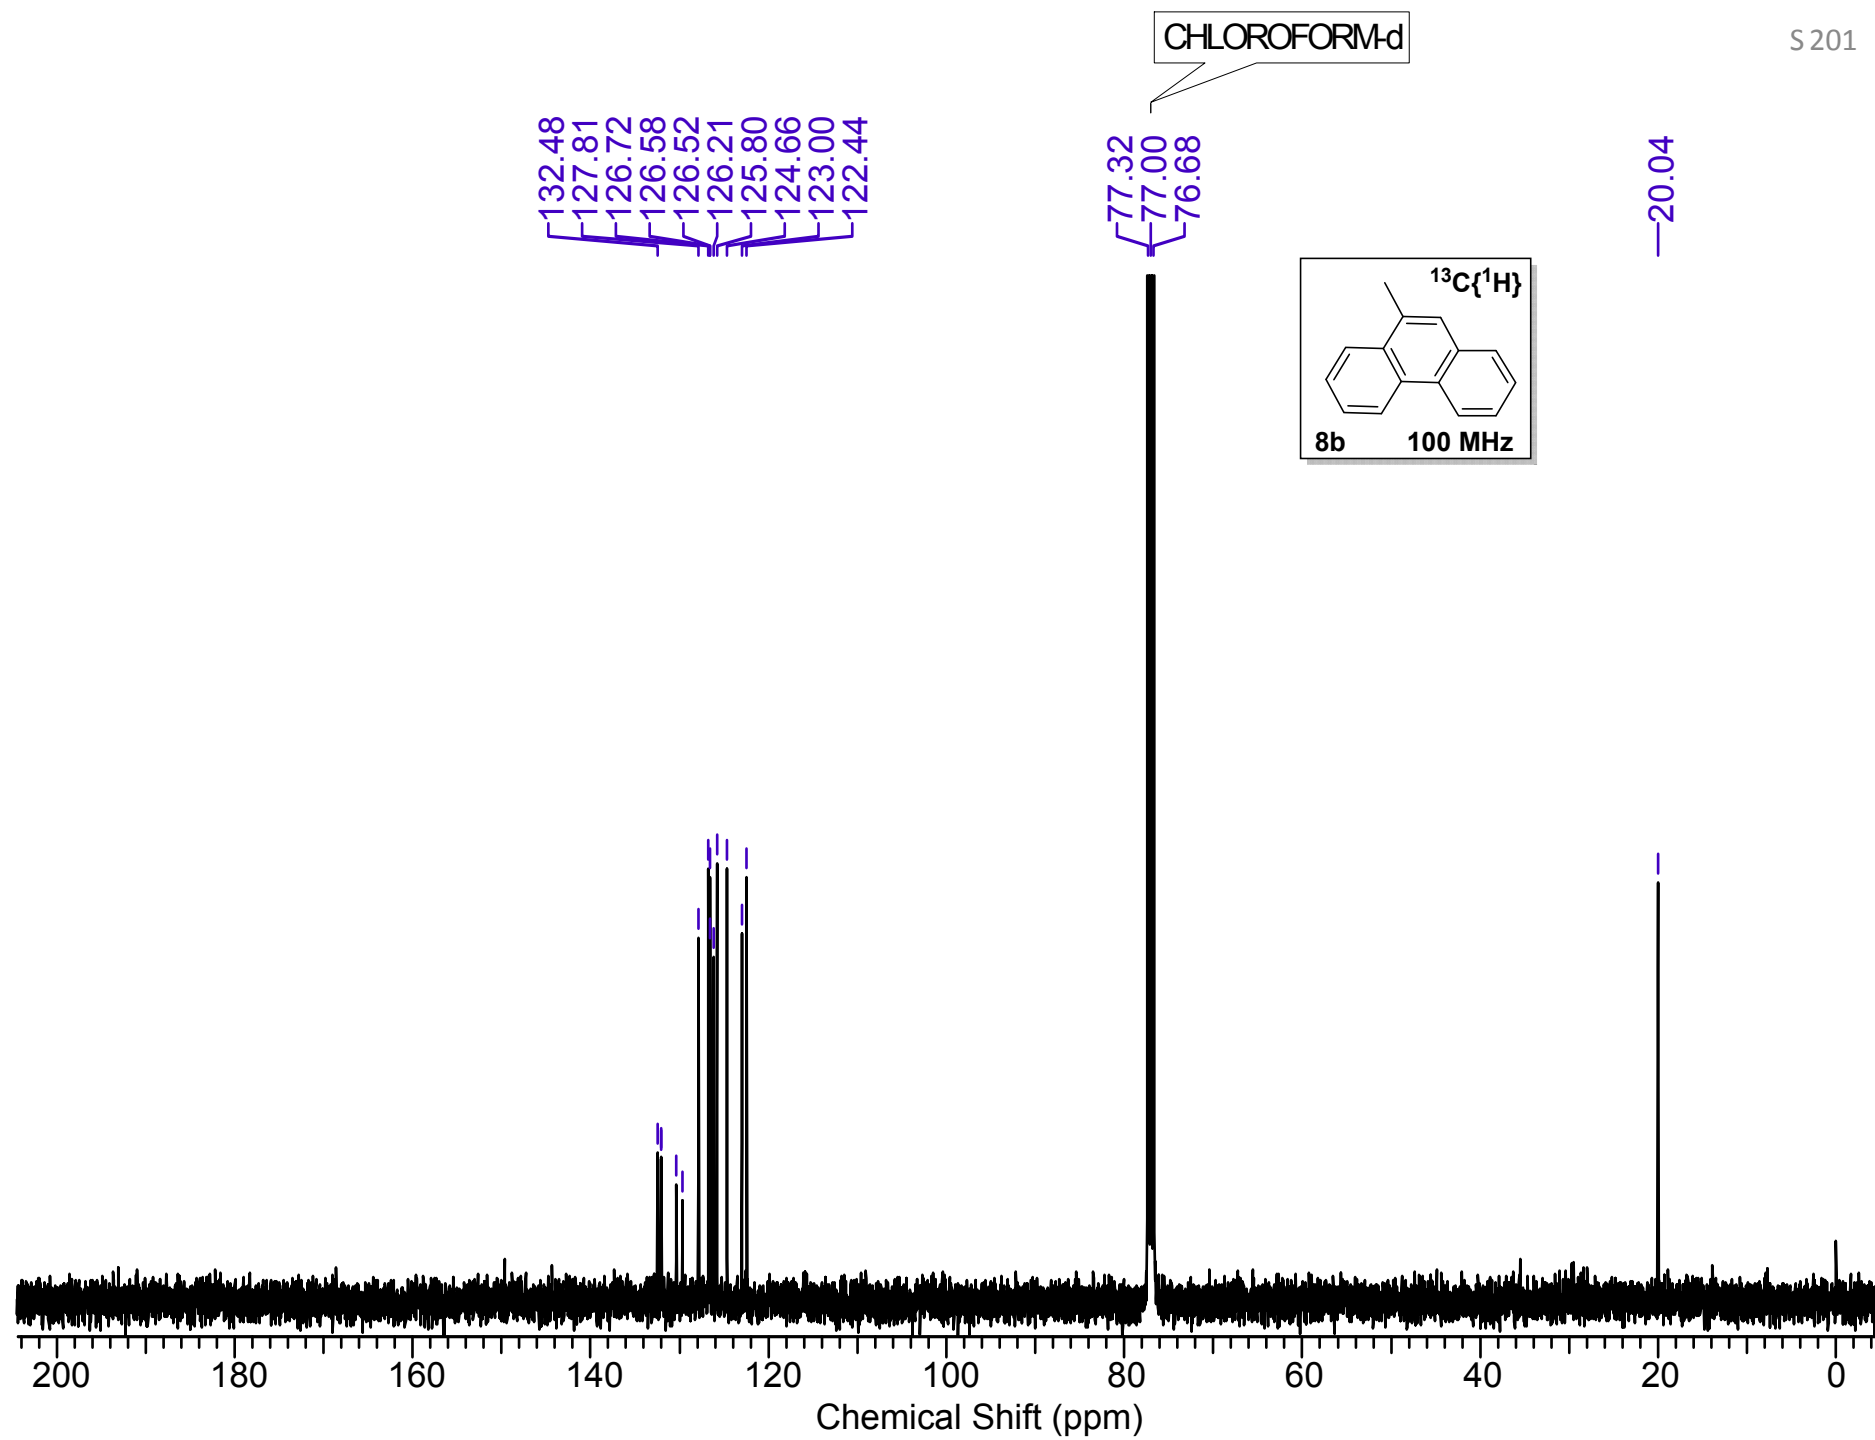

CHLOROFORM-d

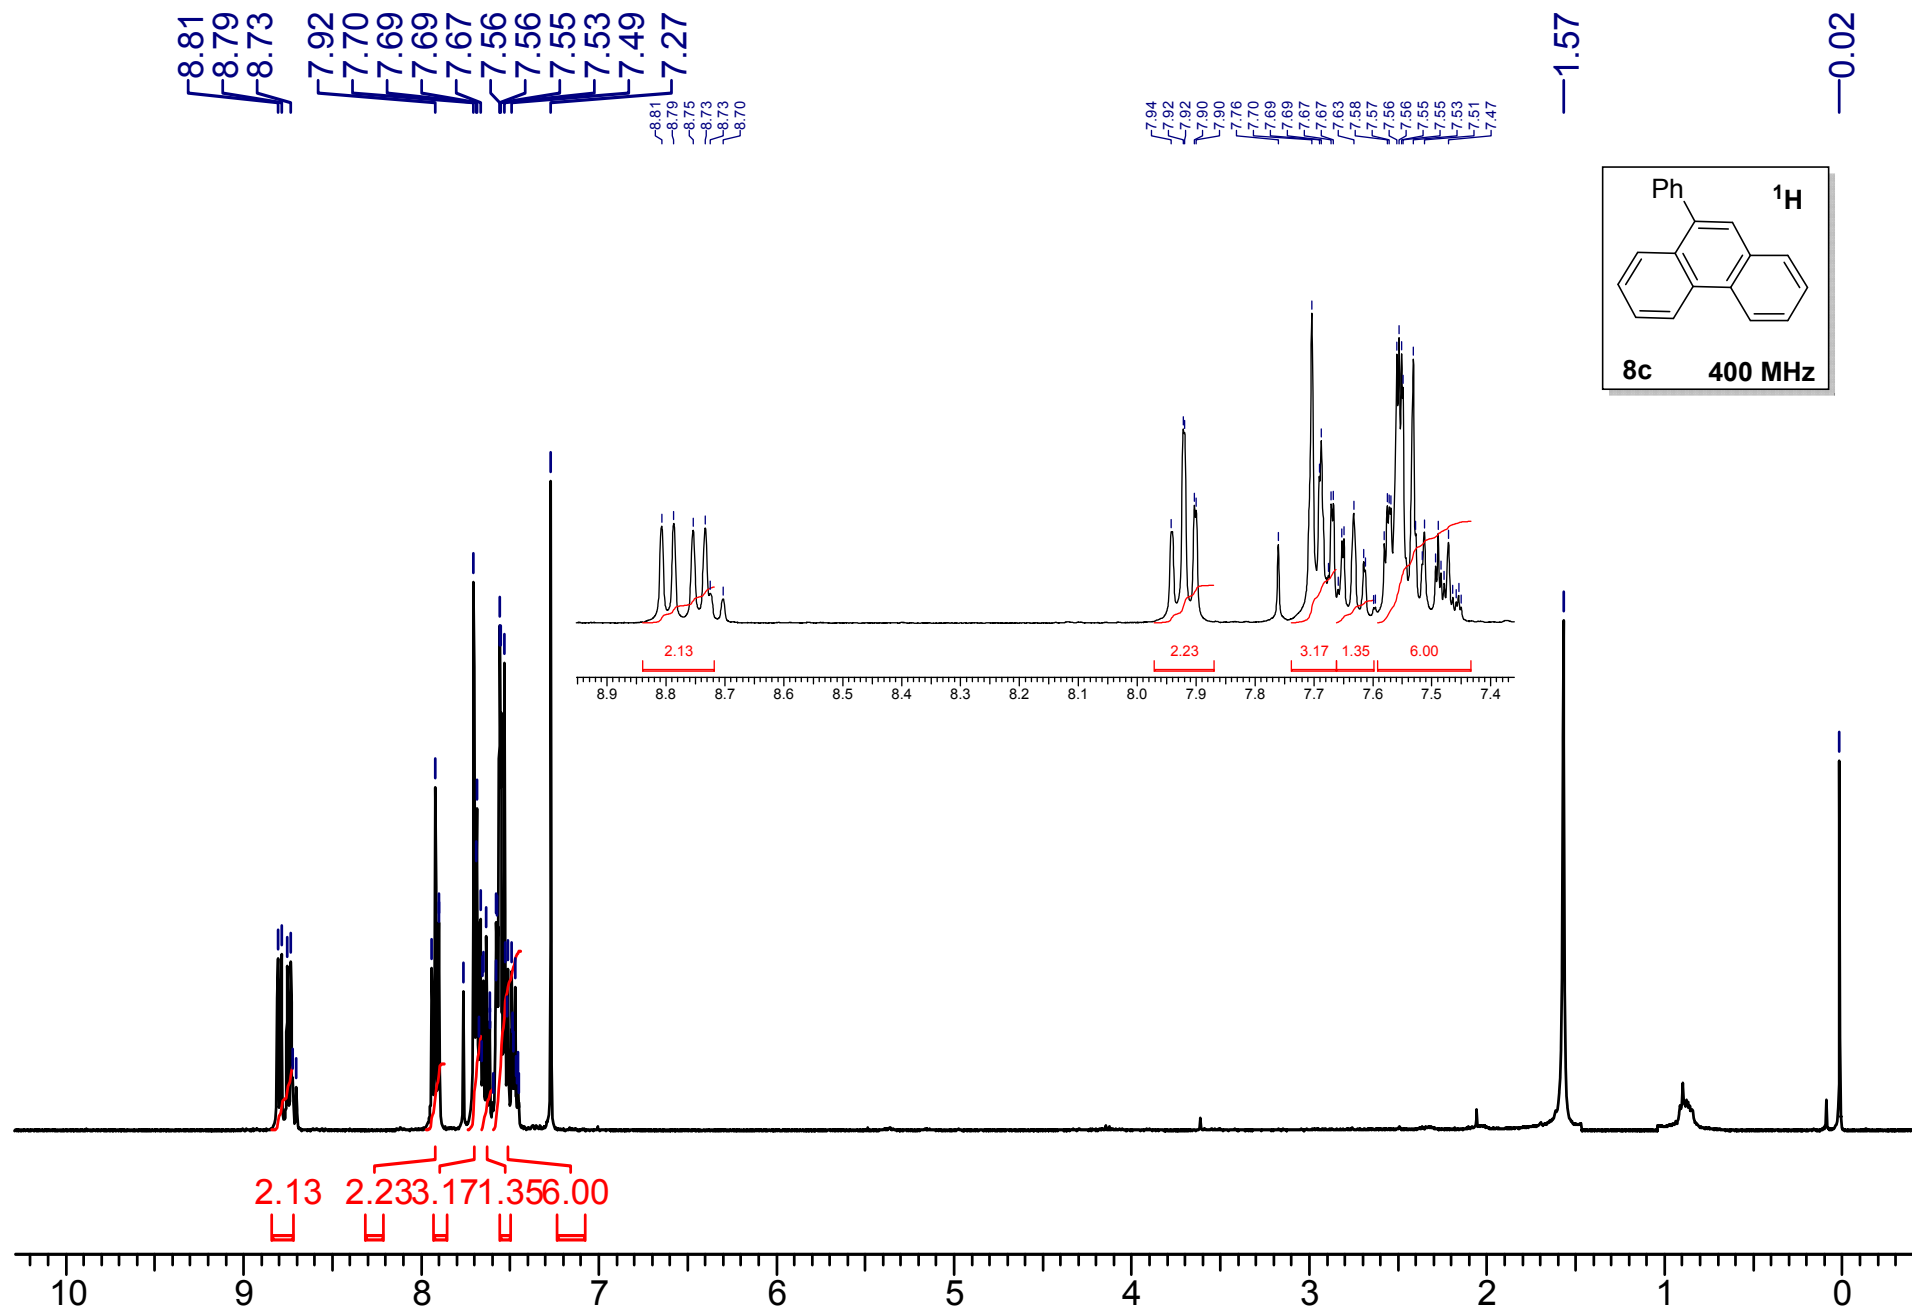

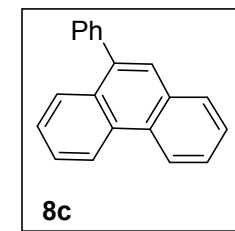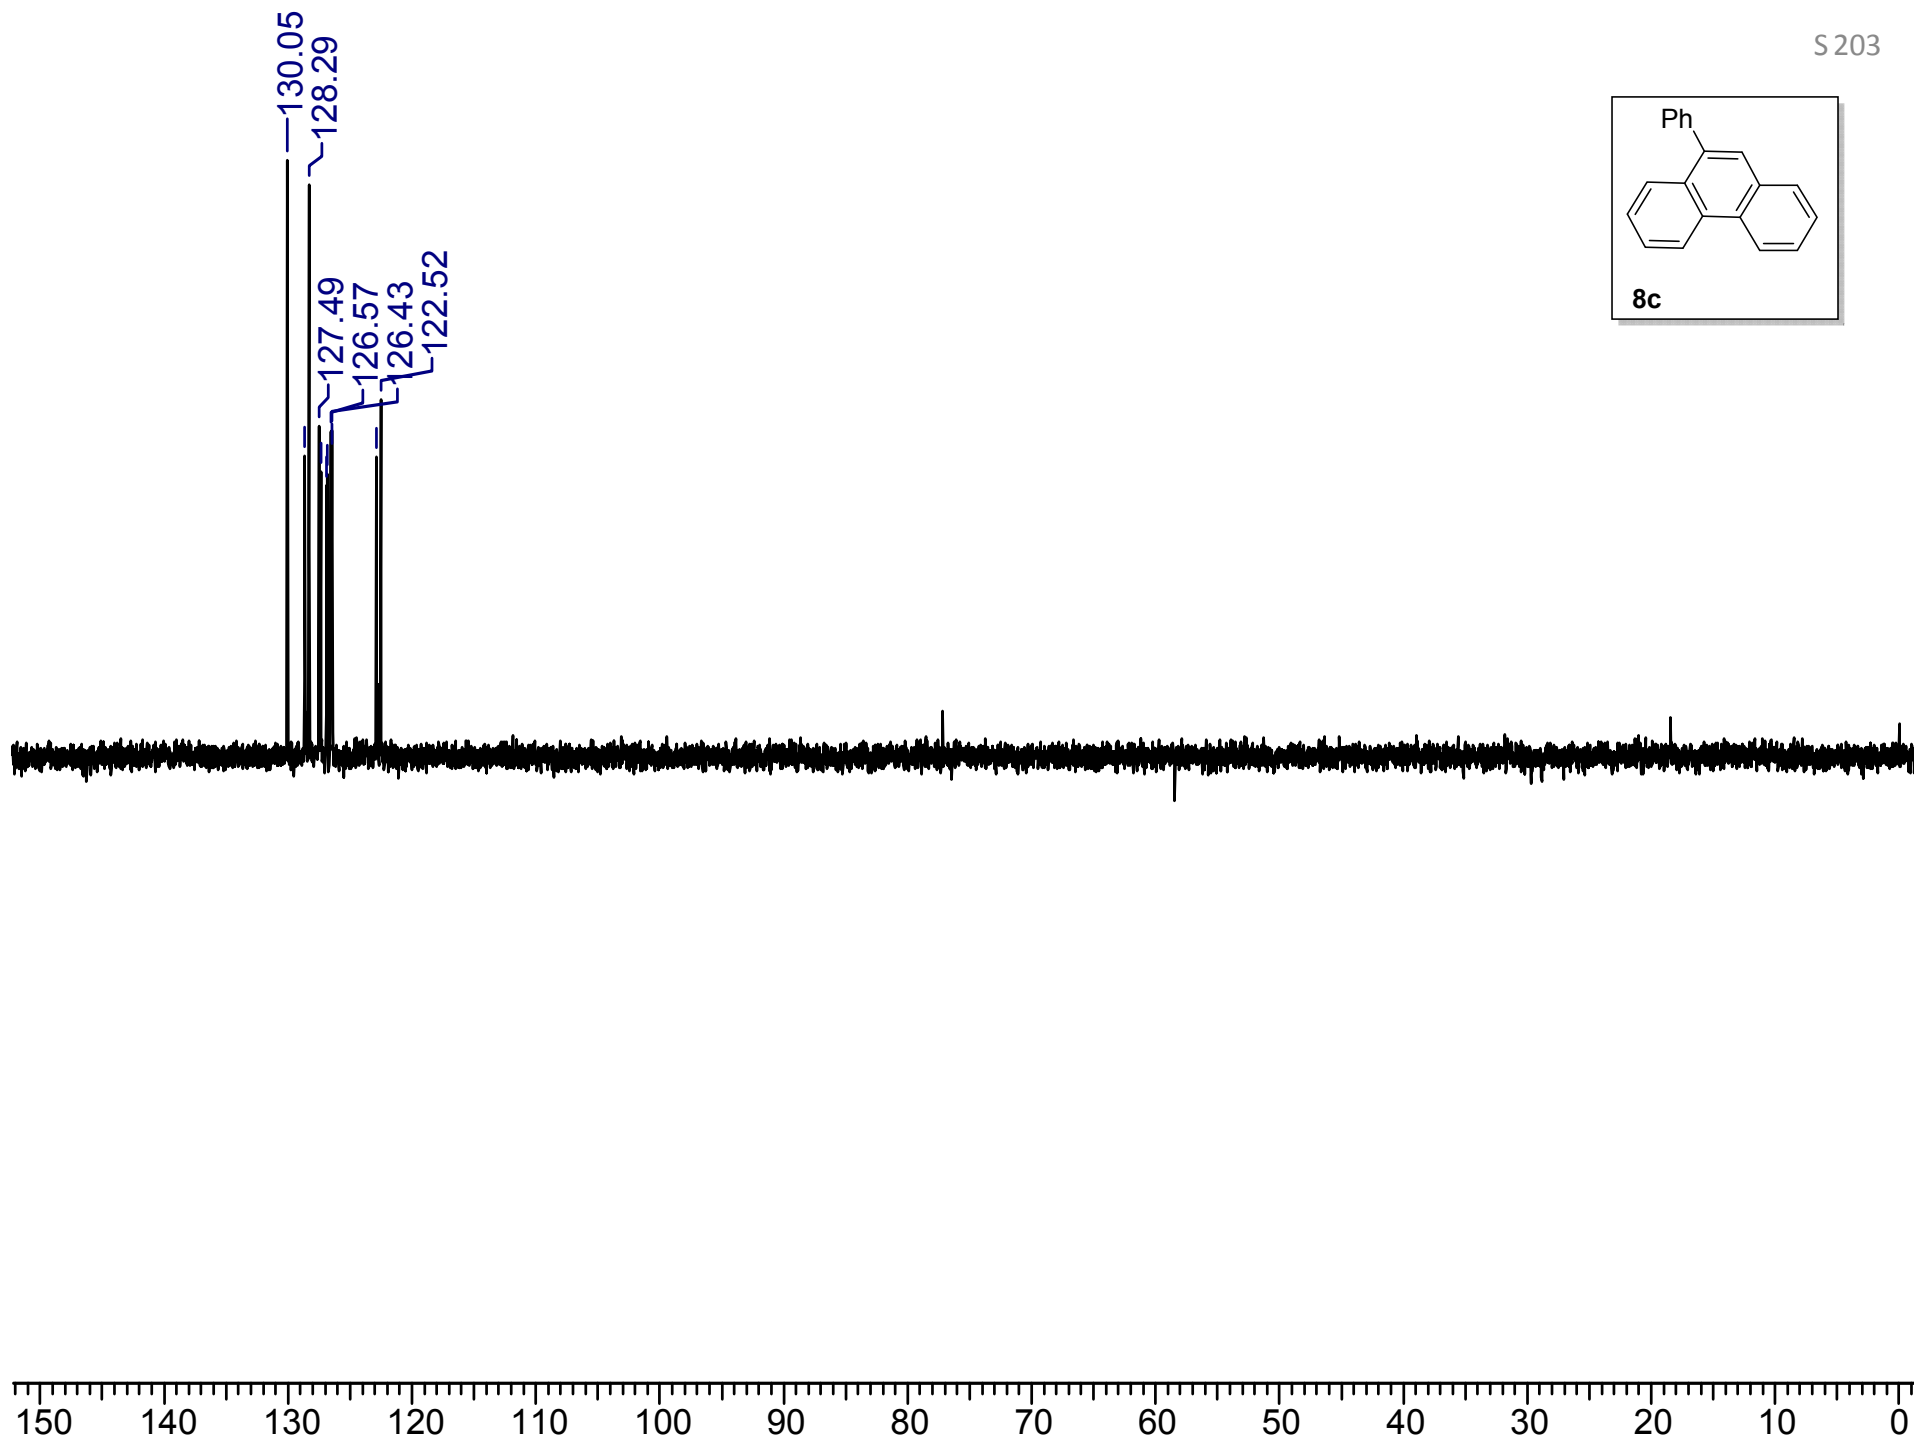

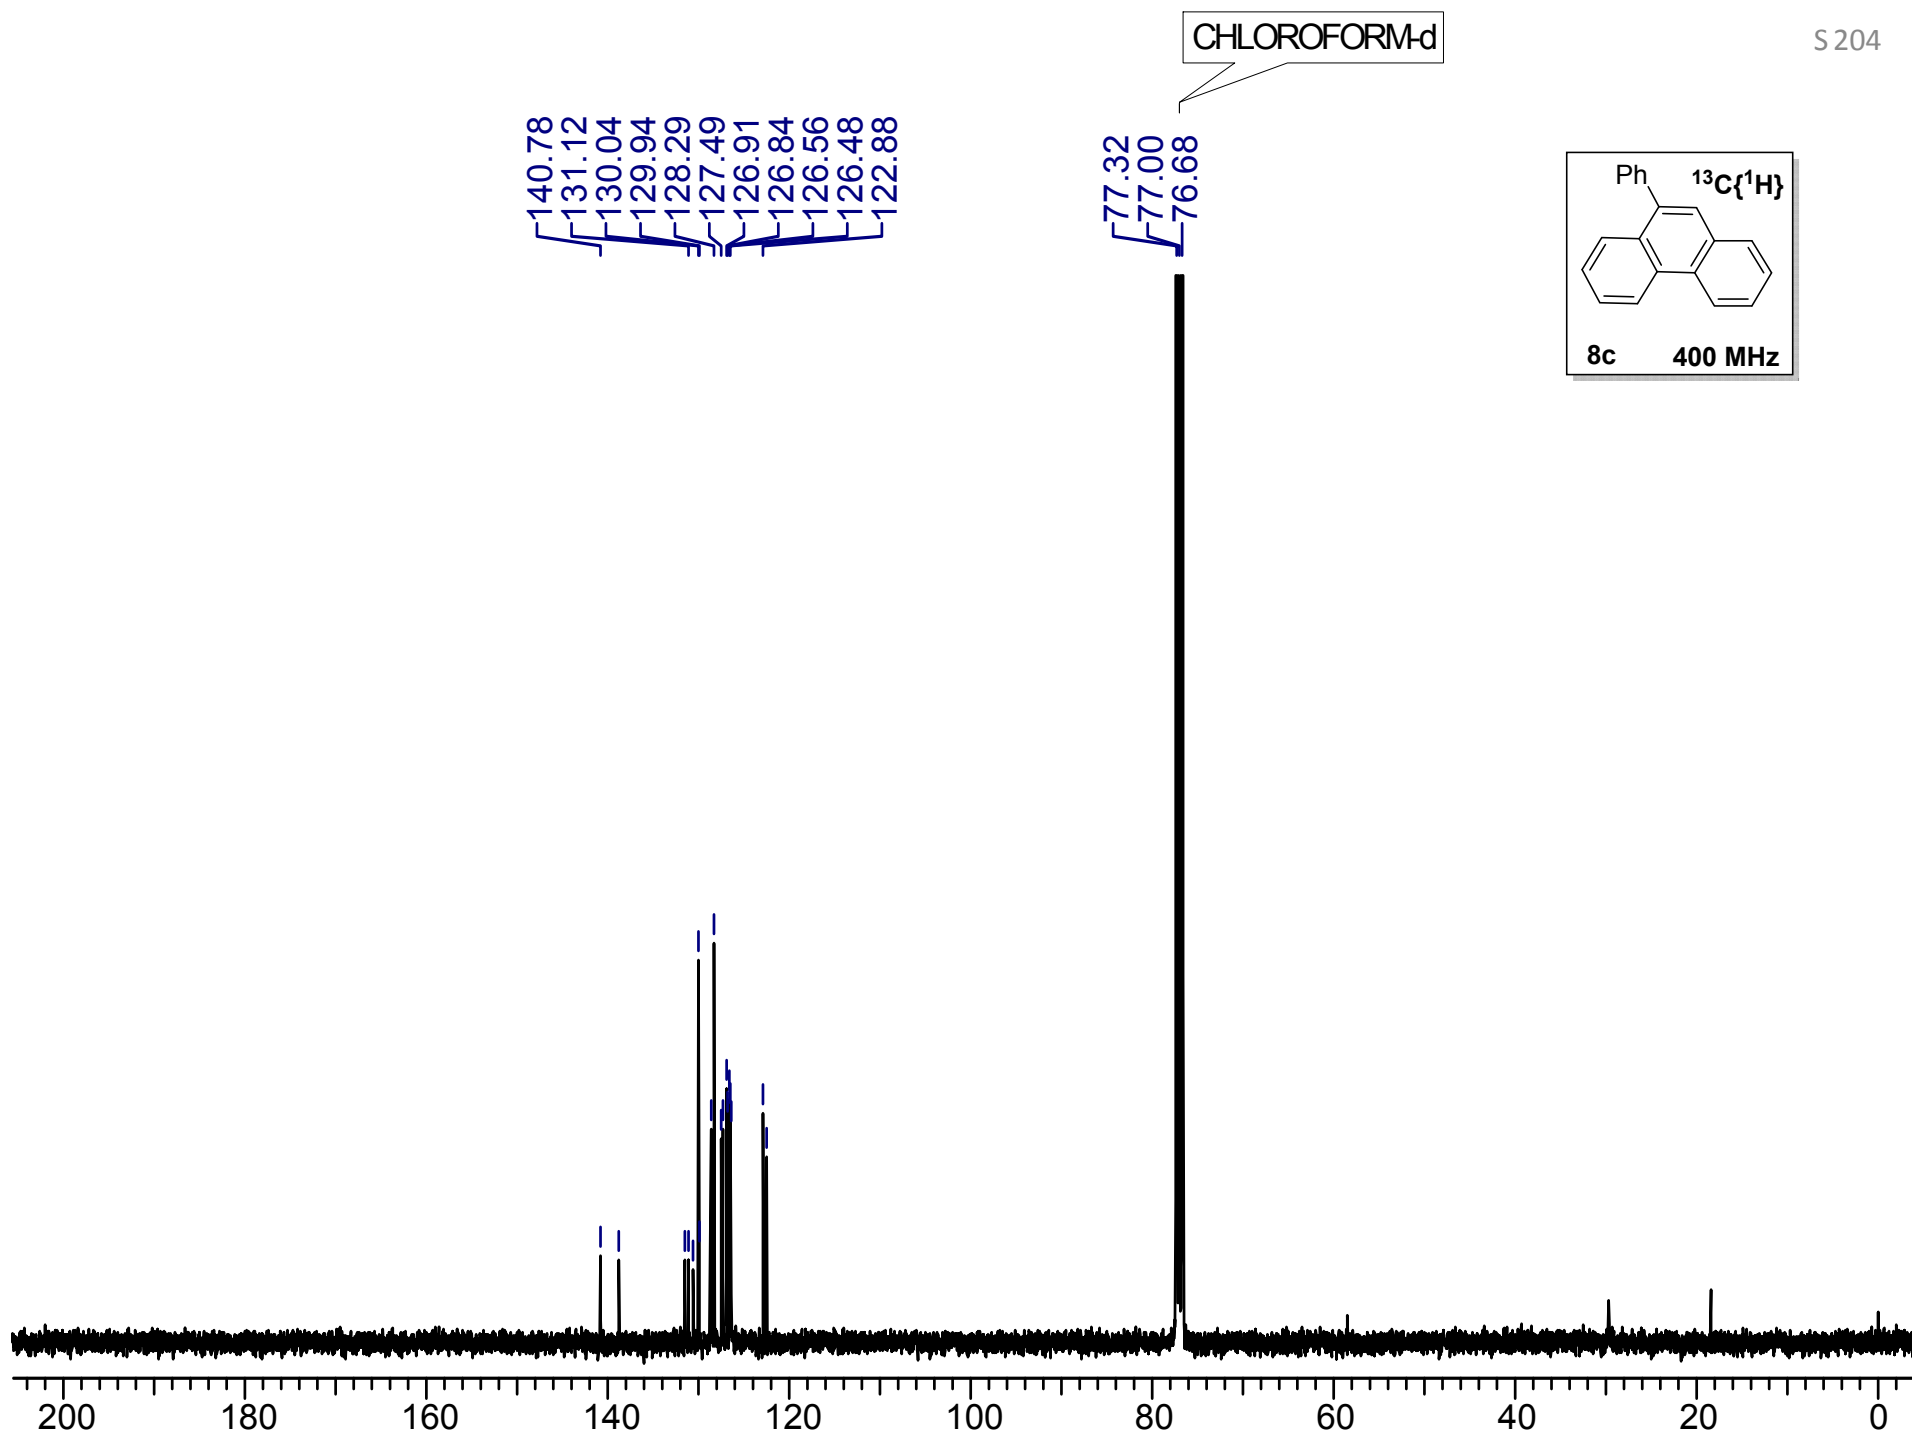

CHLOROFORM-d

Water

S 205

8.66  
8.65  
8.64  
8.06  
8.06  
7.69  
7.69  
7.67  
7.67  
7.65  
7.65  
7.53  
7.45  
7.43  
7.27

2.75  
2.75

1.57

0.03

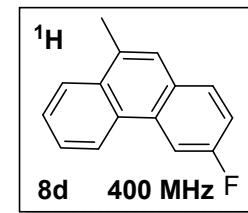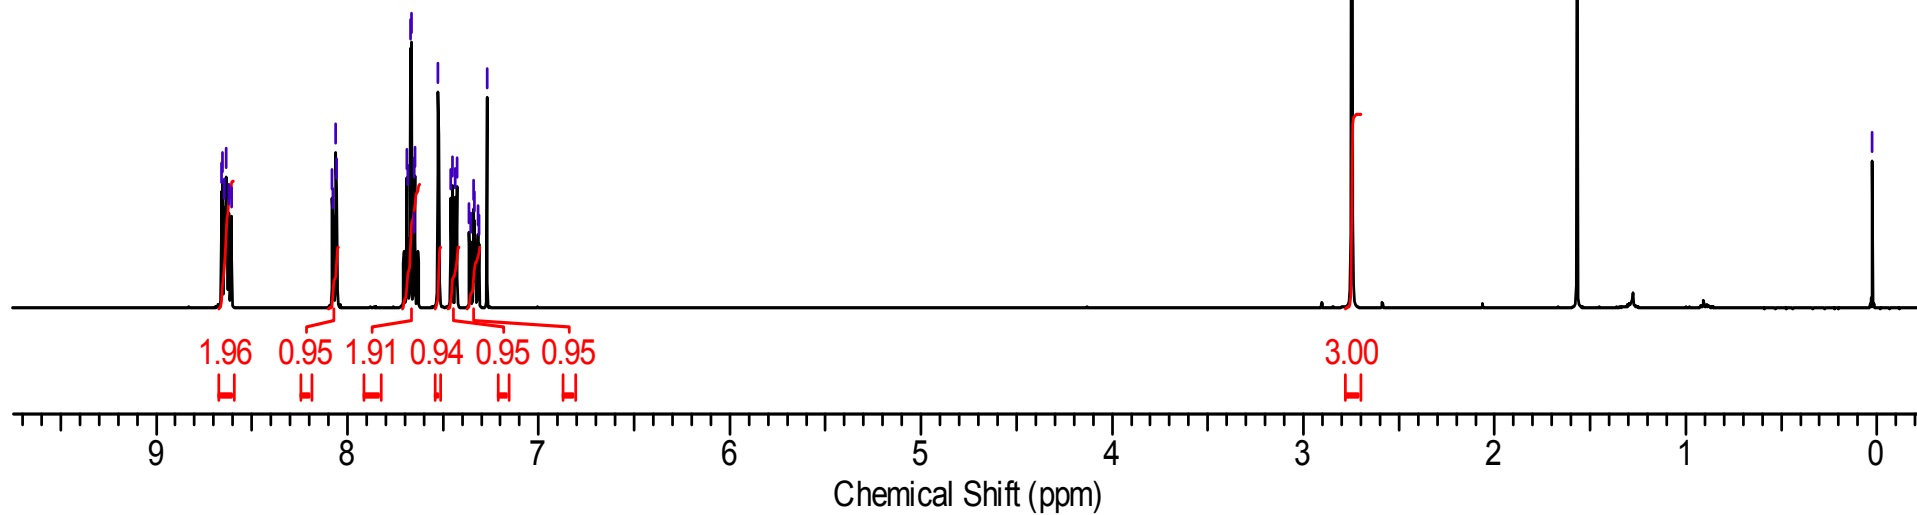

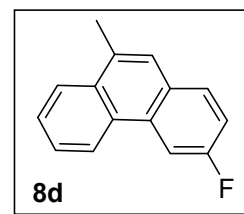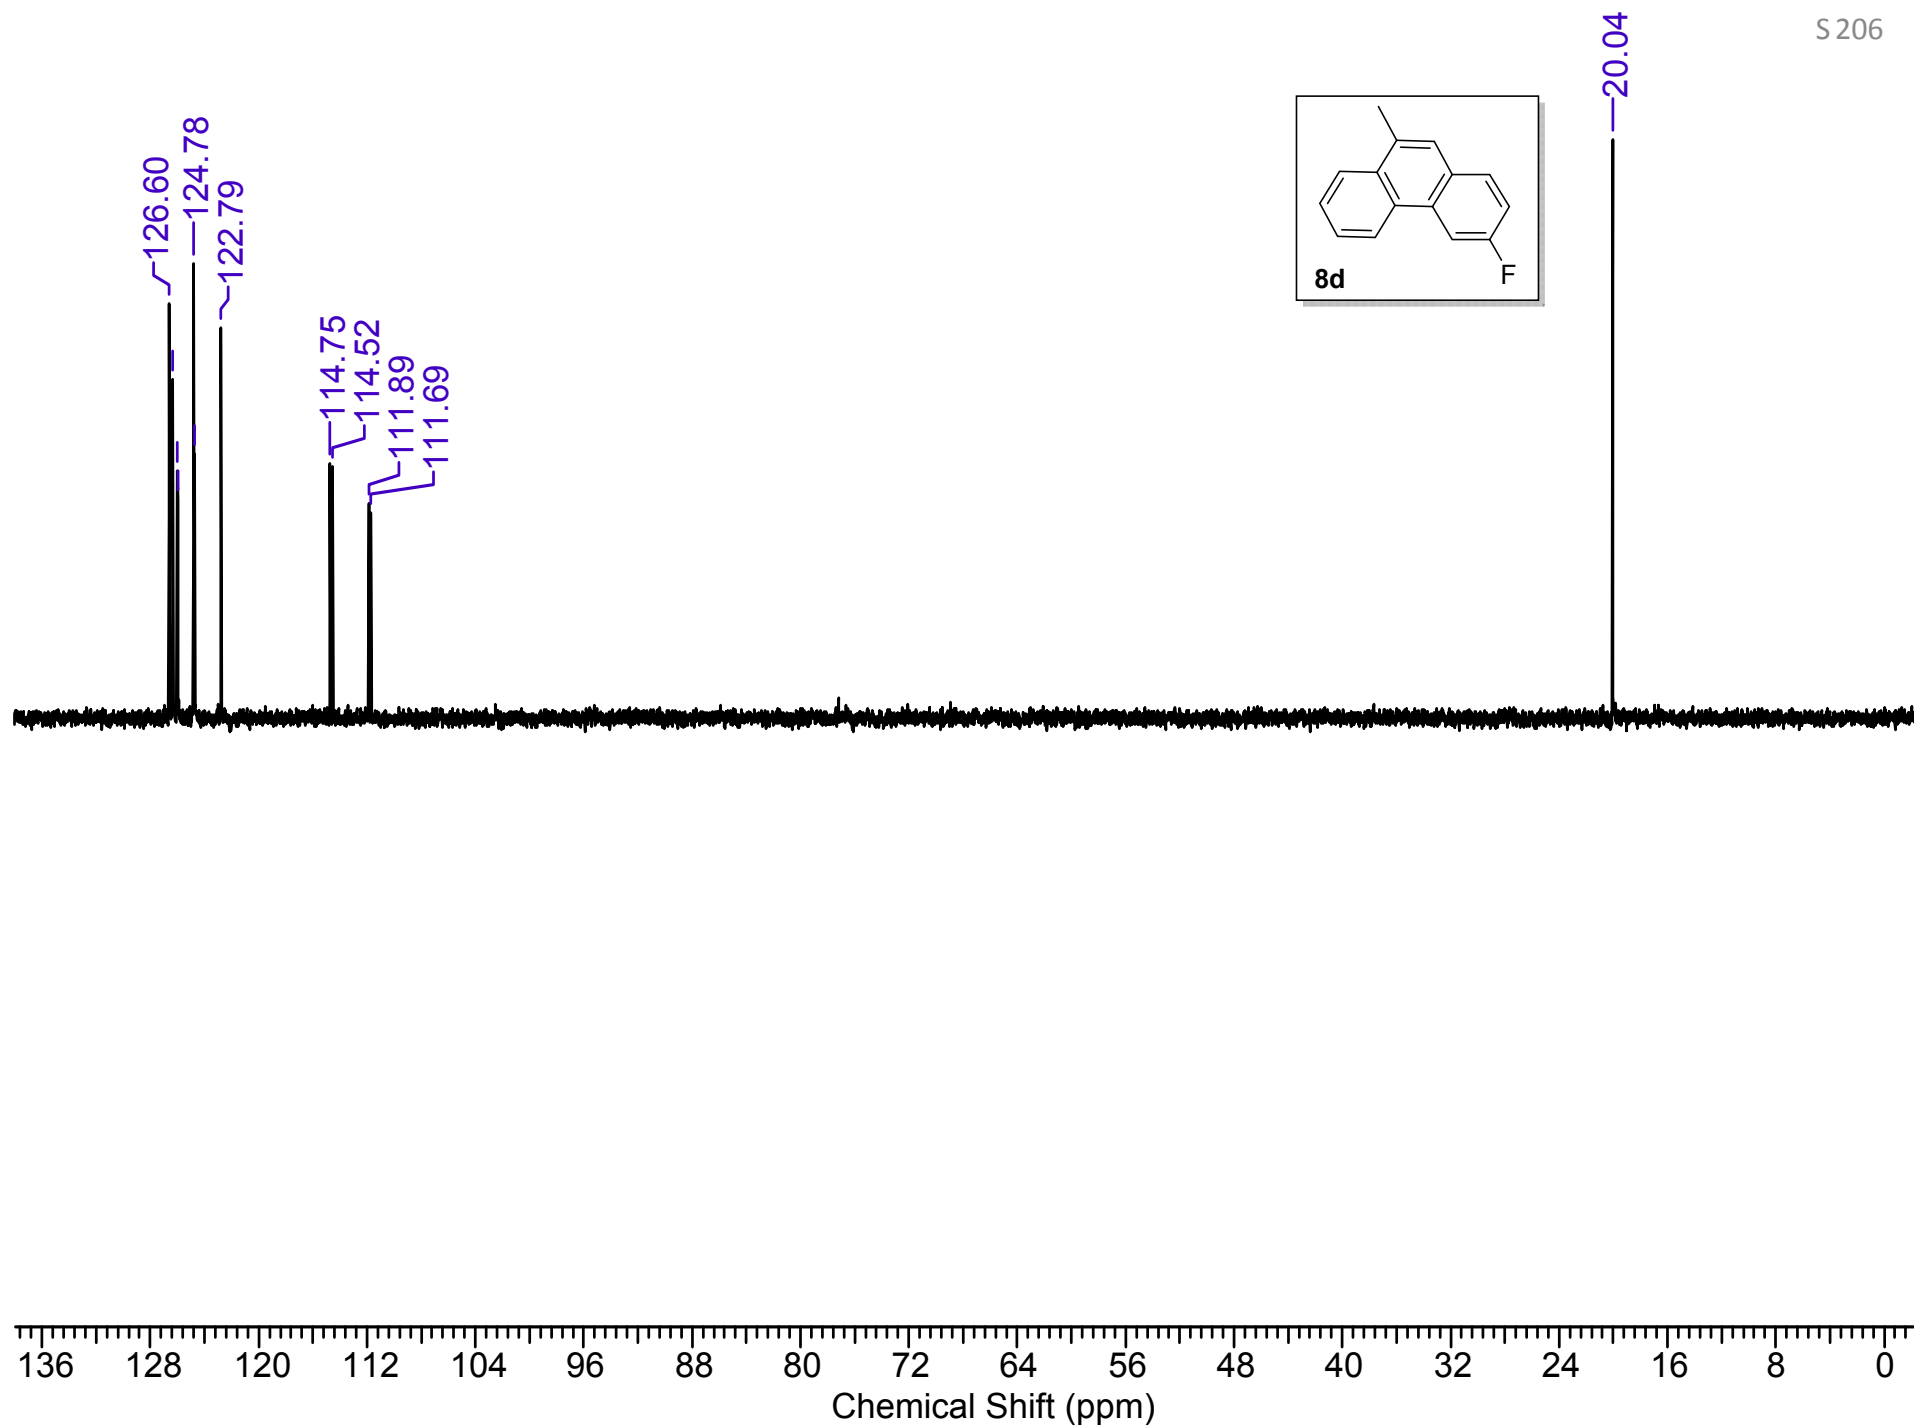

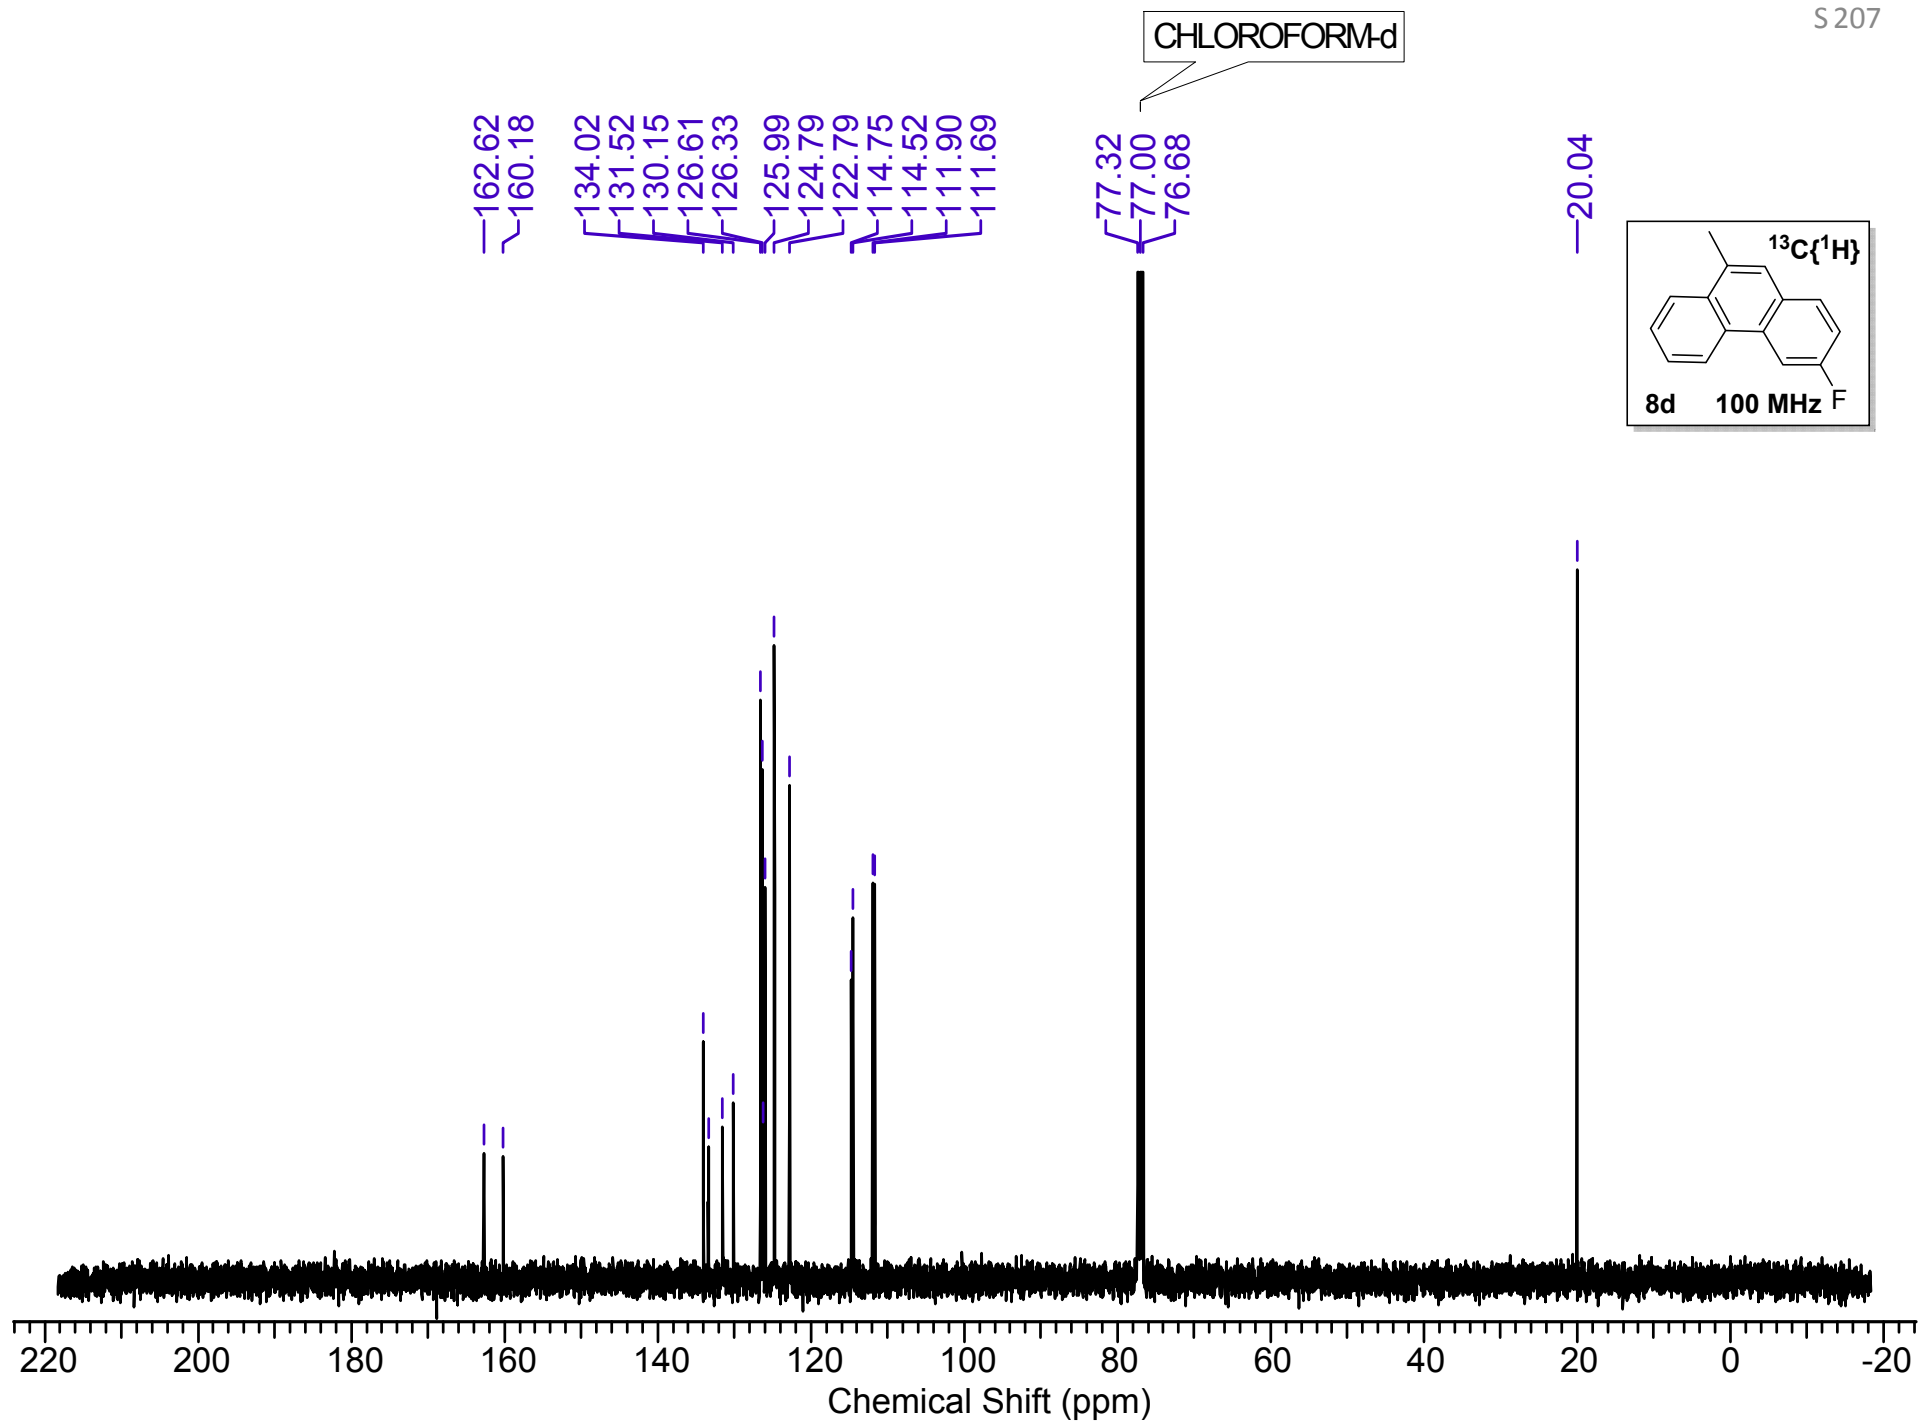

CHLOROFORM-d

Water

S 208

8.64  
8.62  
8.57  
8.55  
8.06  
8.04  
7.65  
7.60  
7.54  
7.27  
7.25  
7.25  
7.23  
7.21  
7.20

3.97

2.74

1.58

0.03

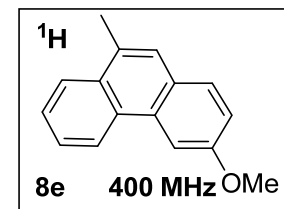

1.011.000.982.000.971.220.97

3.00

3.07

Chemical Shift (ppm)



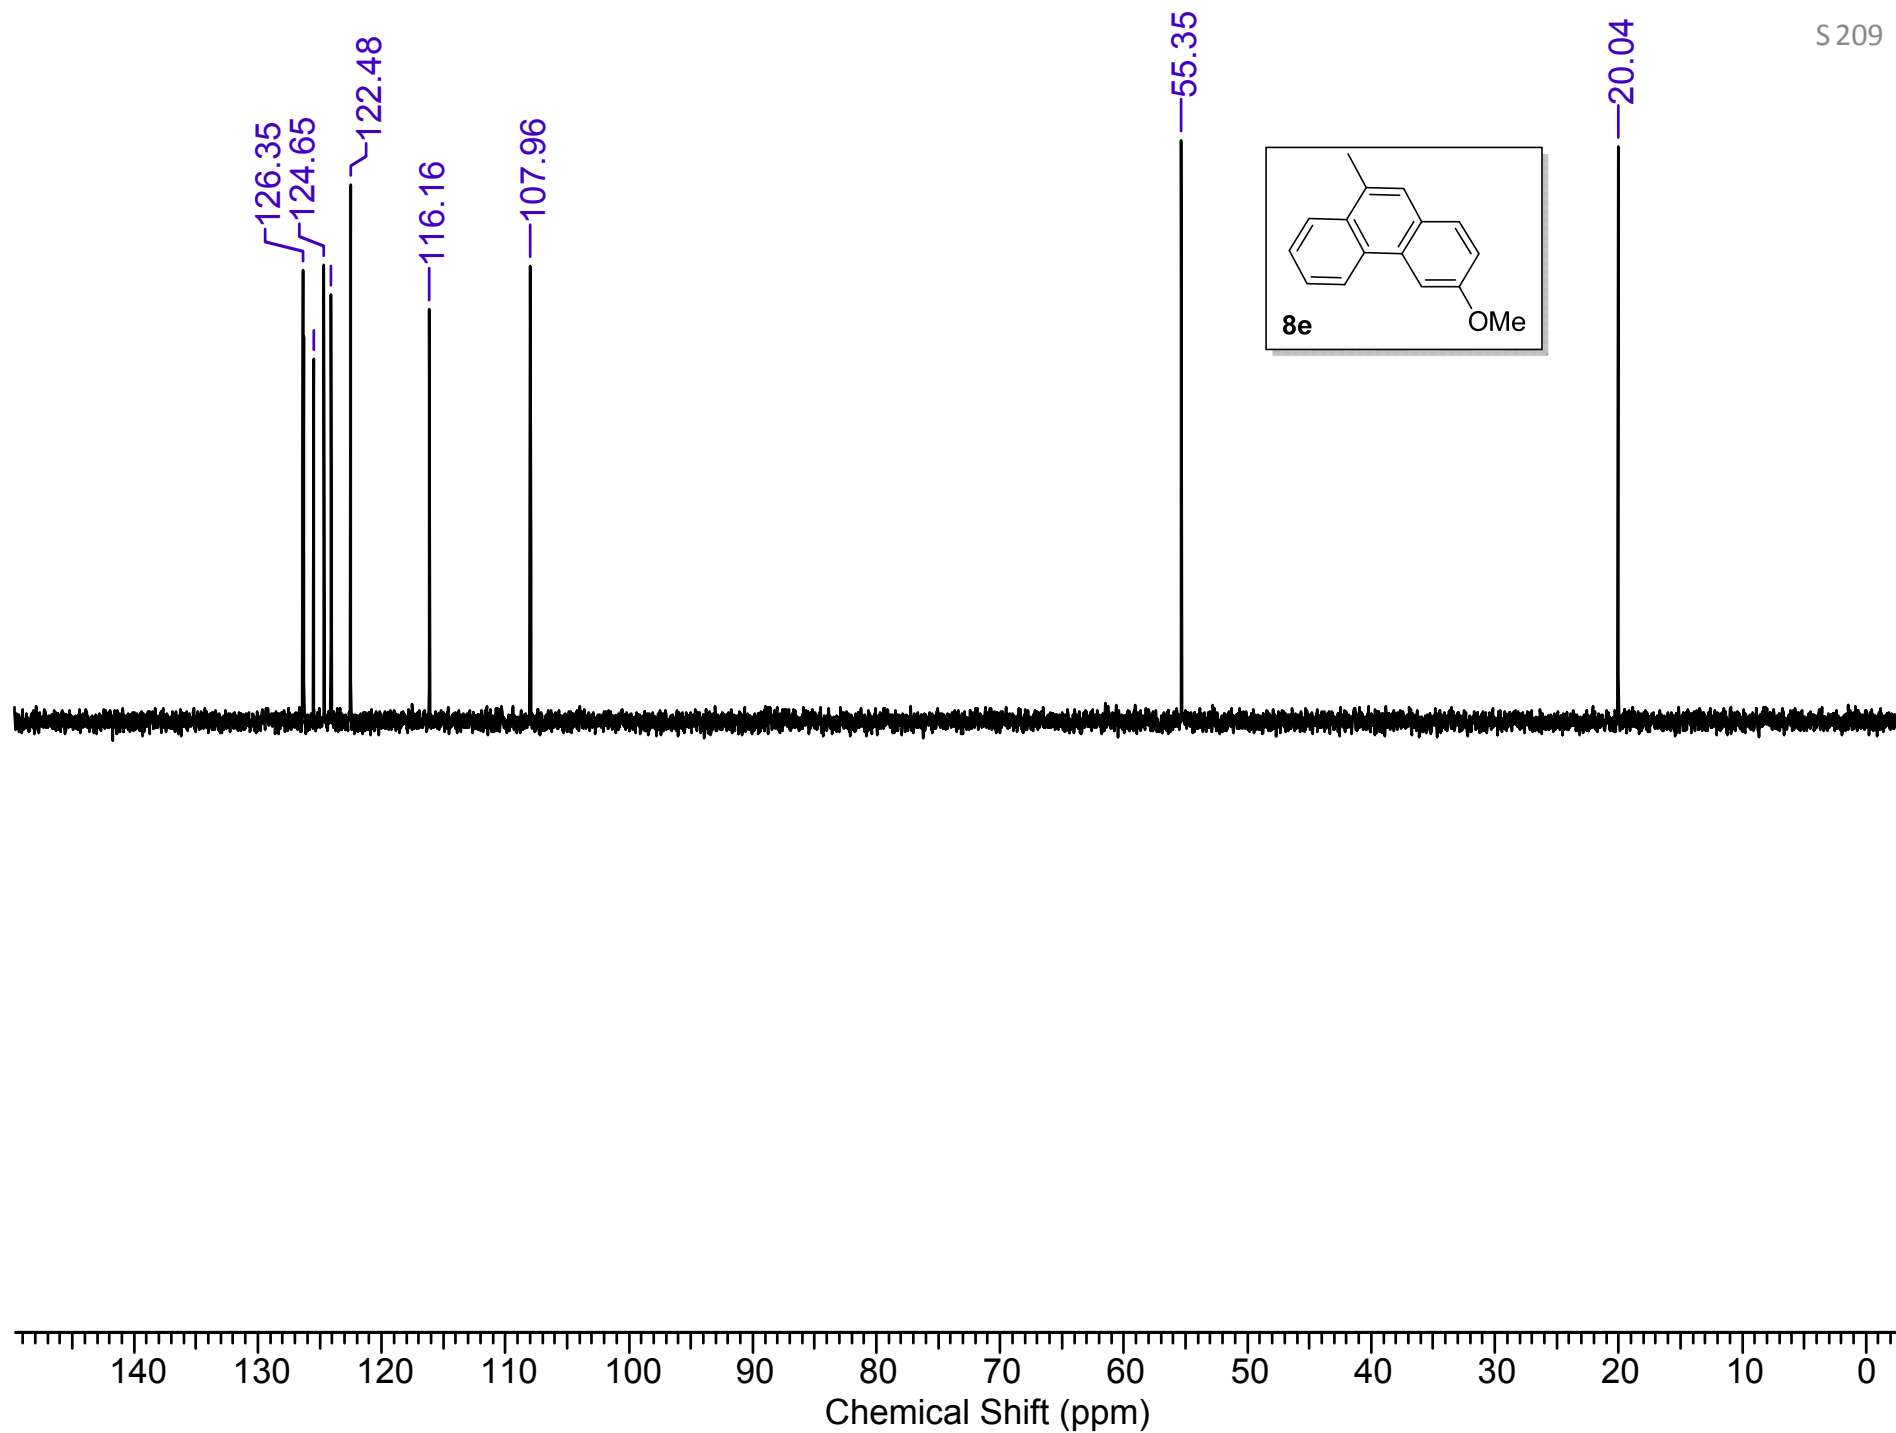

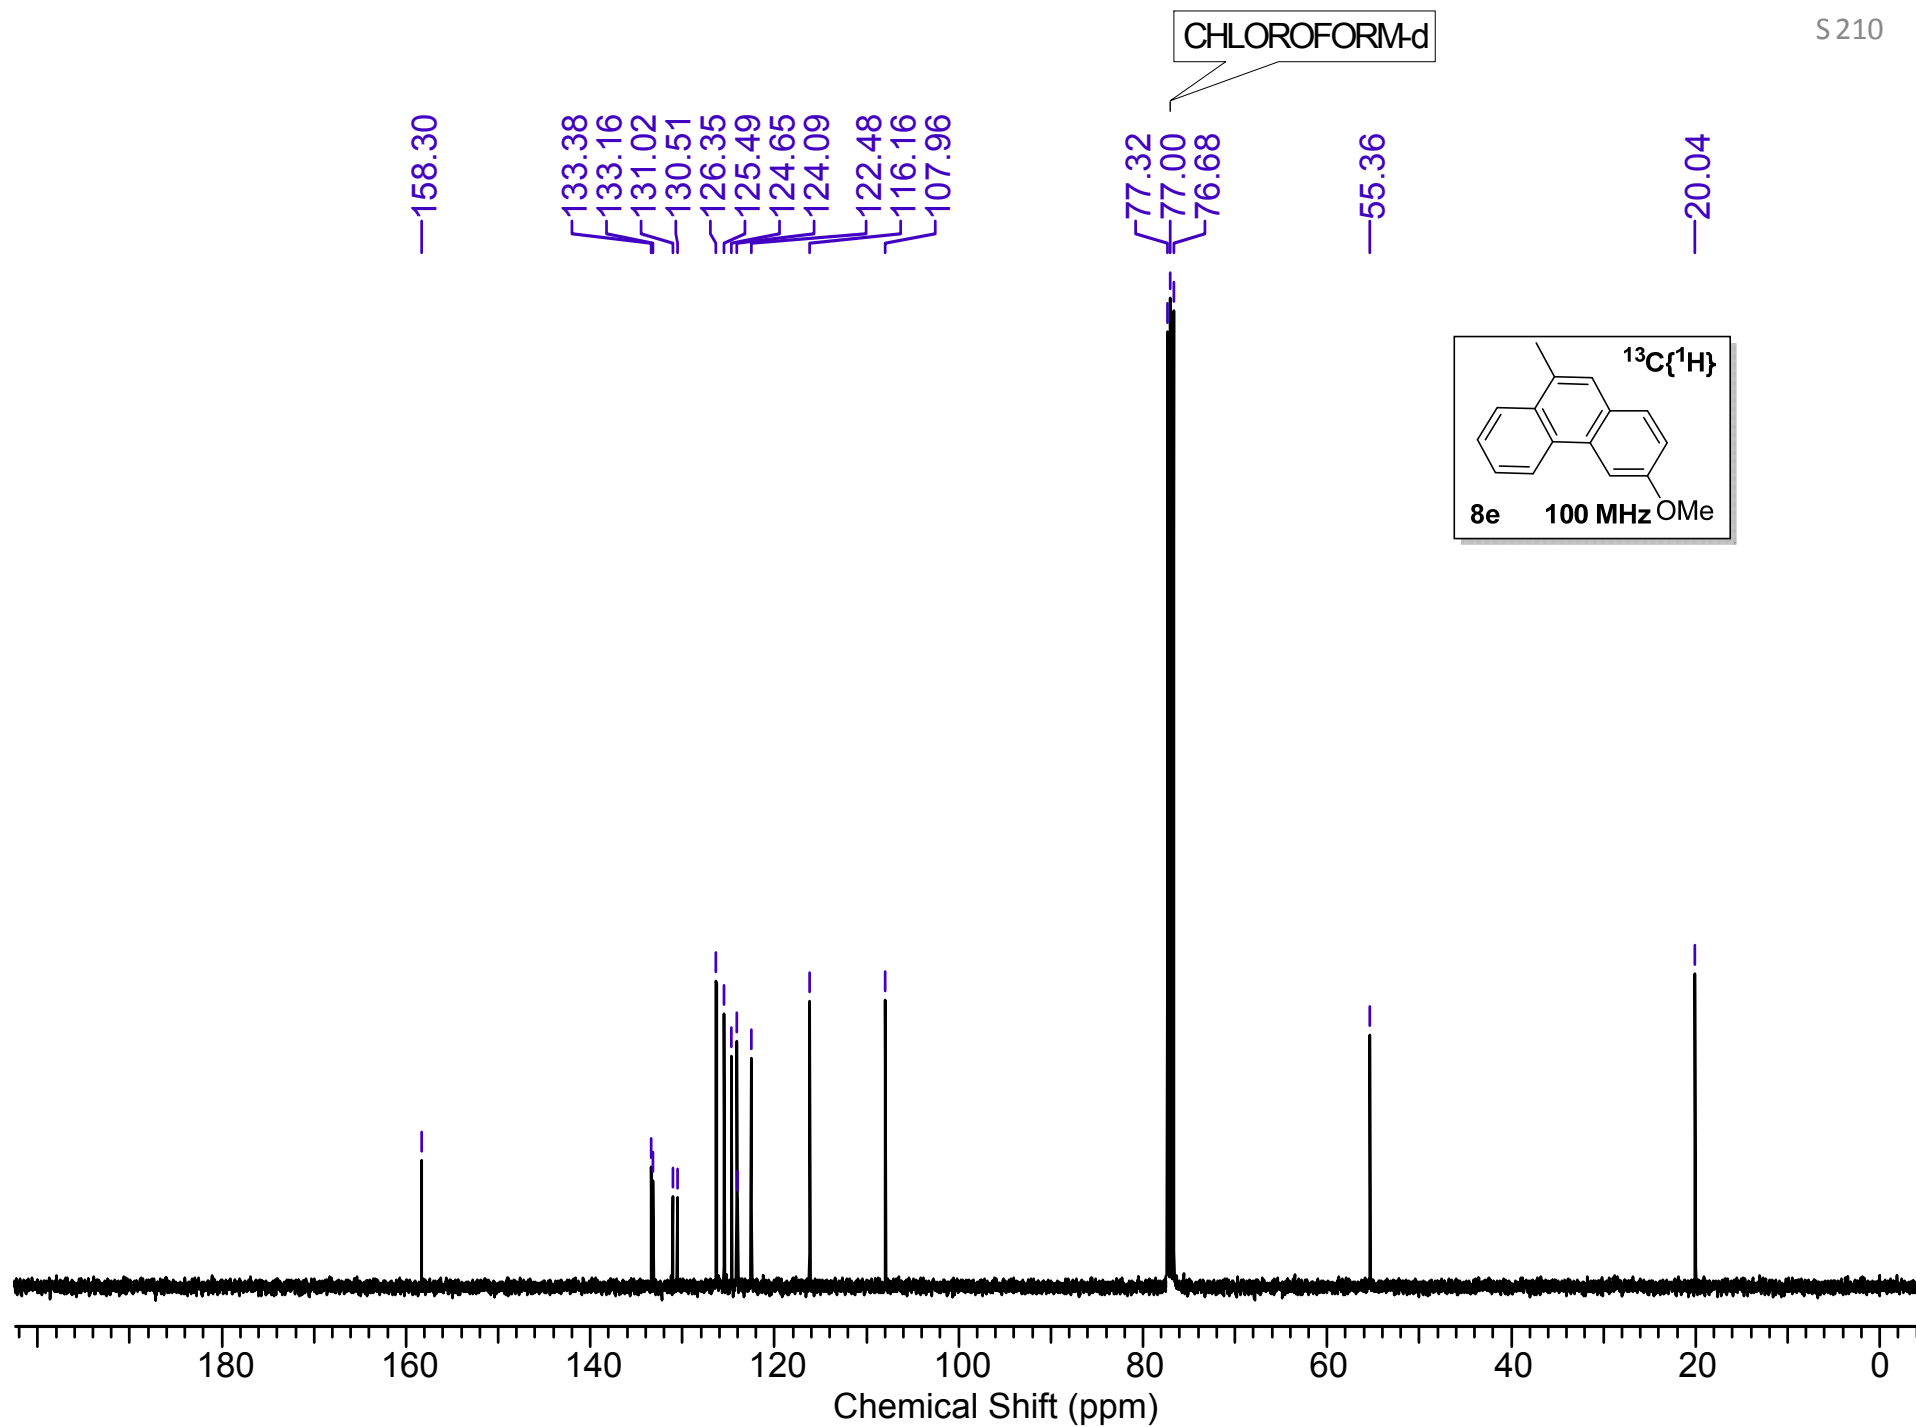

CHLOROFORM-d

8.38  
8.36  
8.08  
8.08  
7.97  
7.96  
7.76  
7.61  
7.60  
7.59  
7.51  
7.50  
7.27

—2.78

—1.58

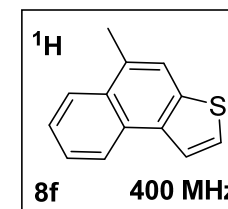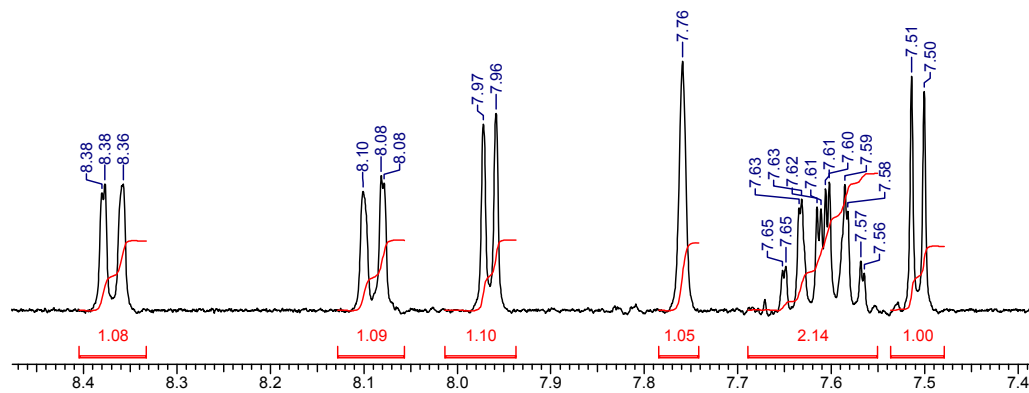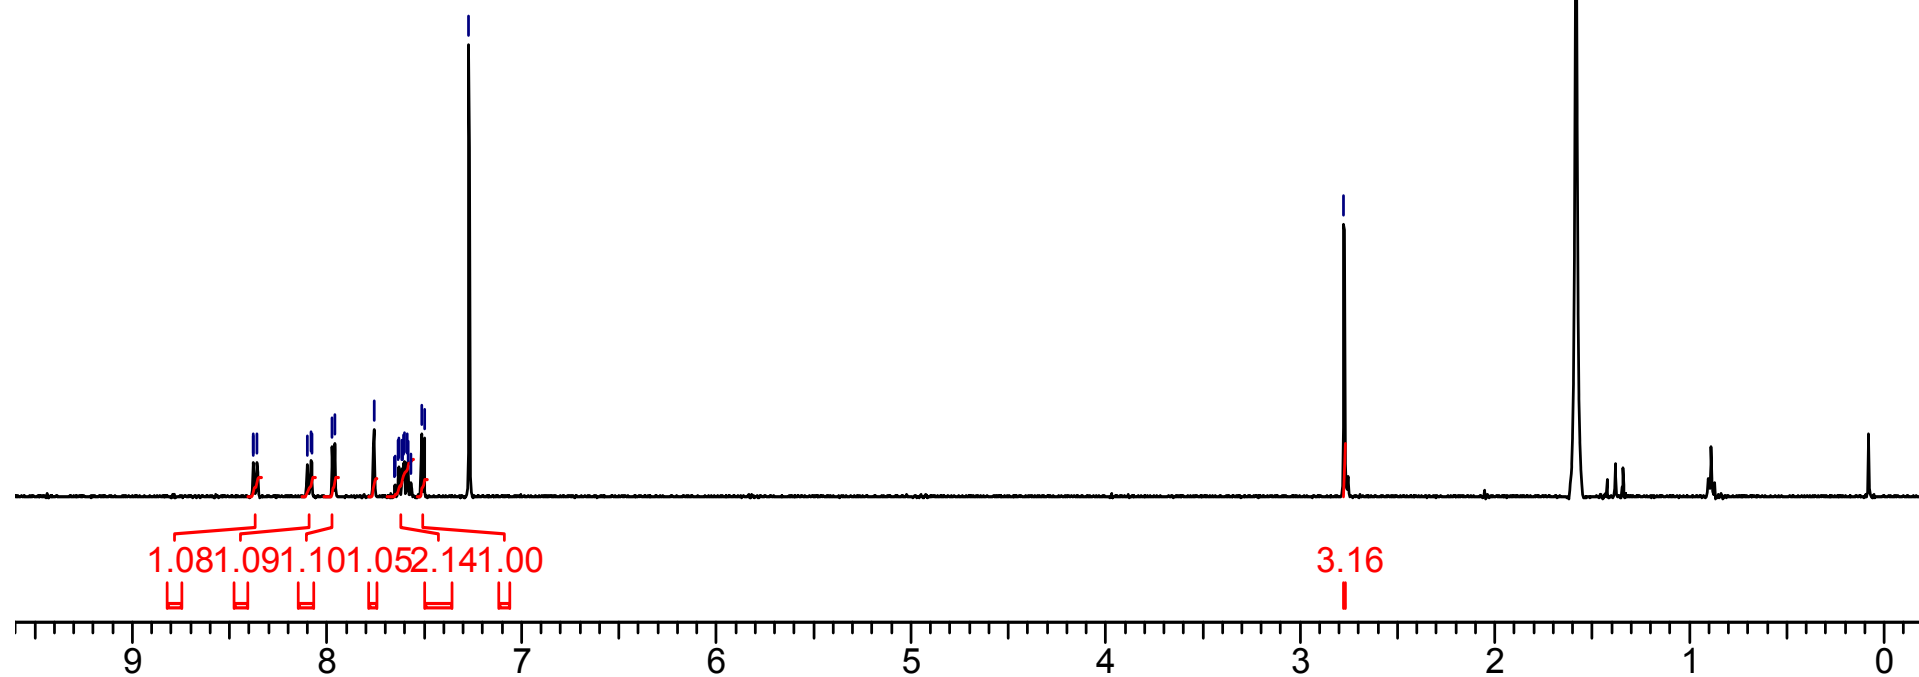

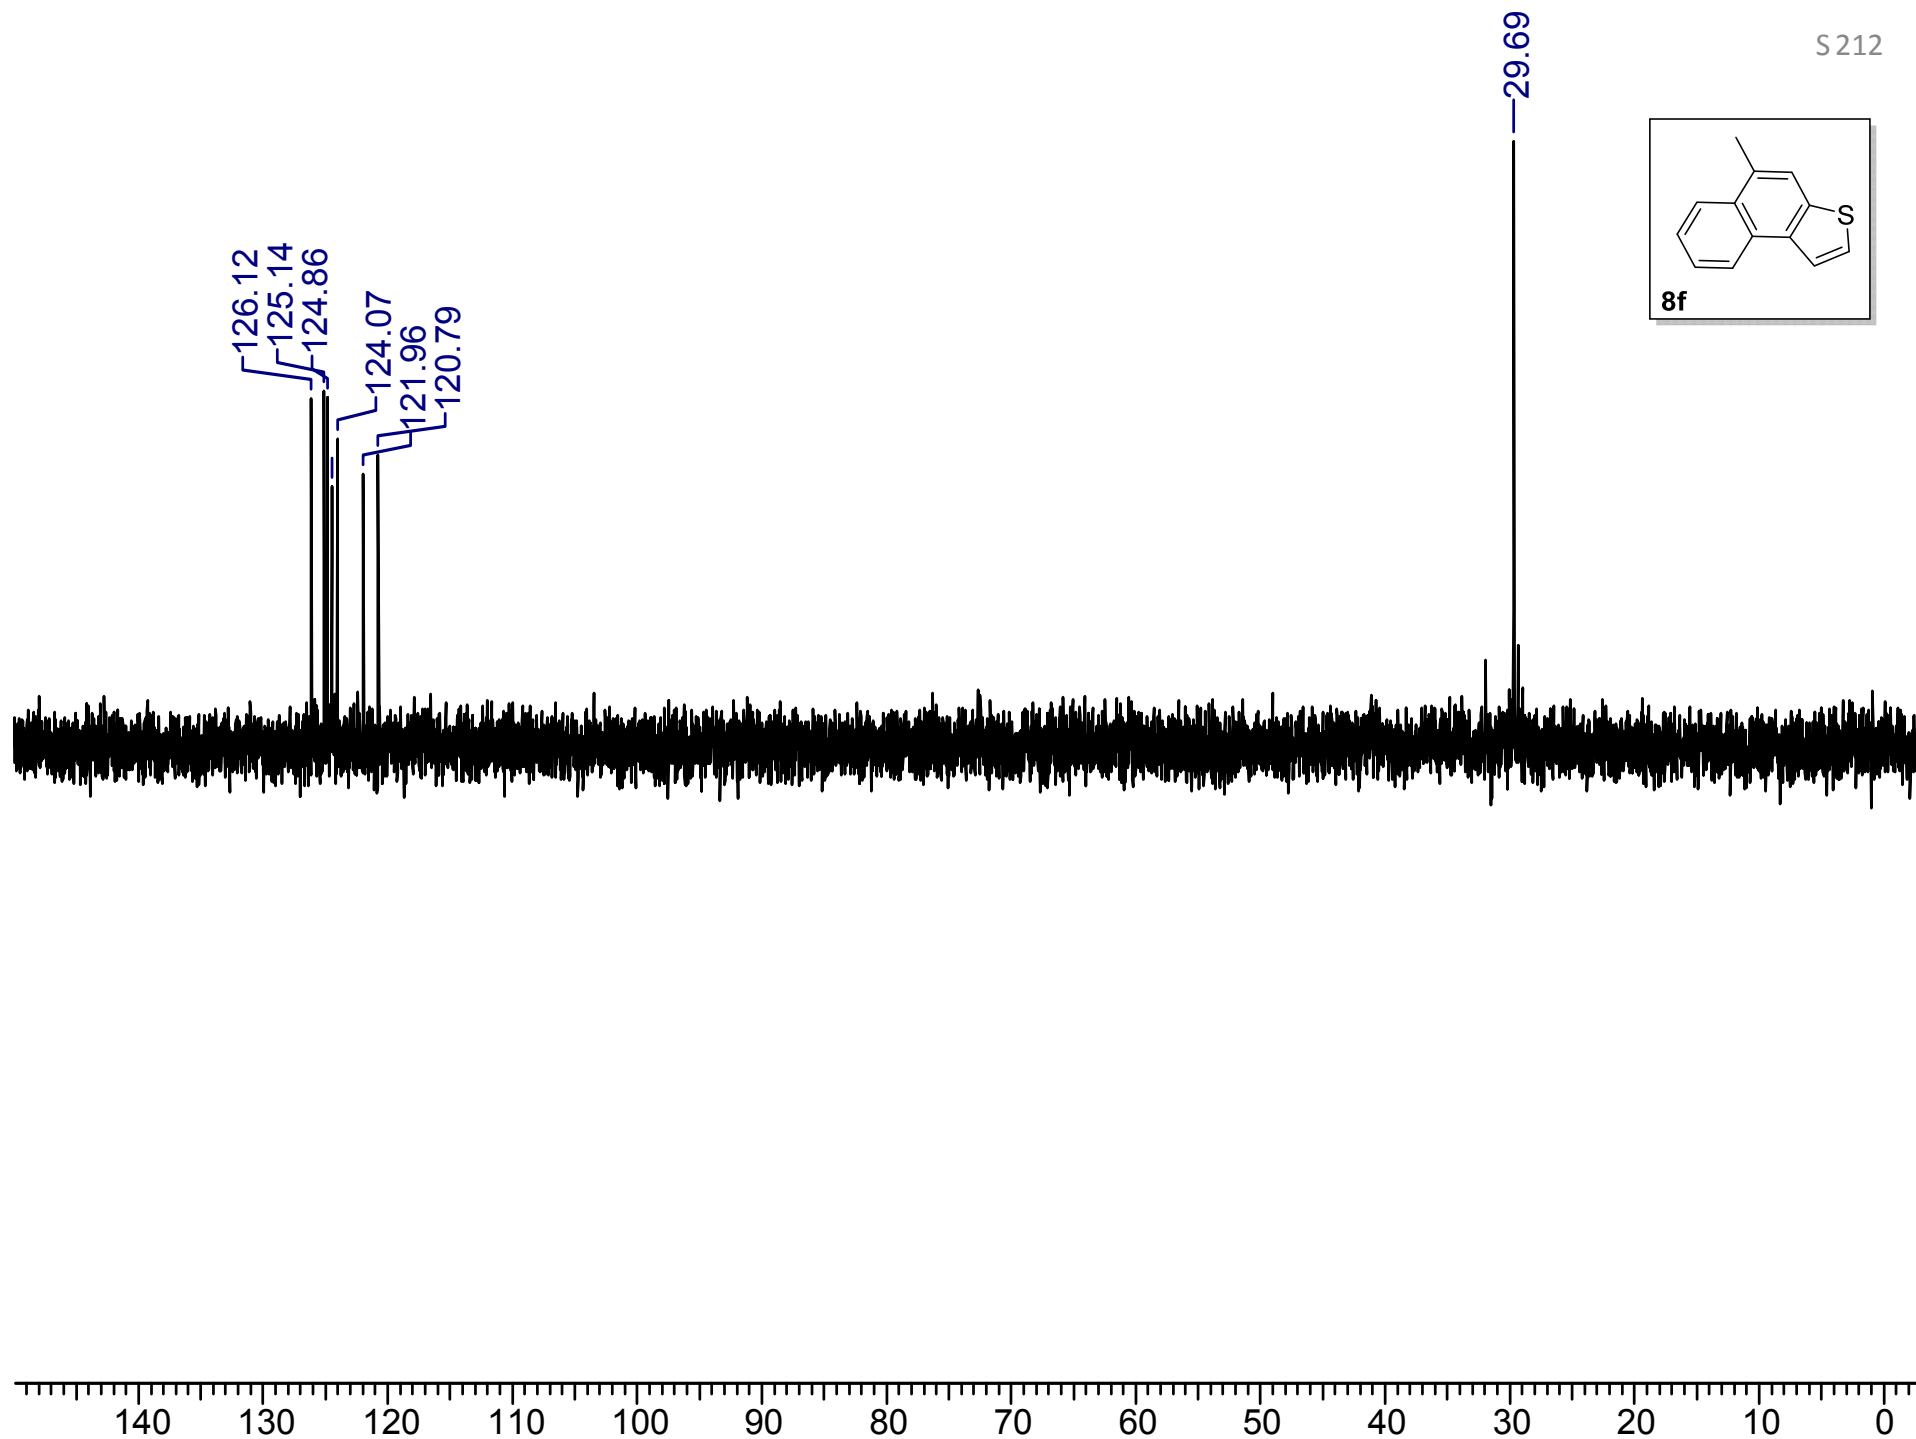

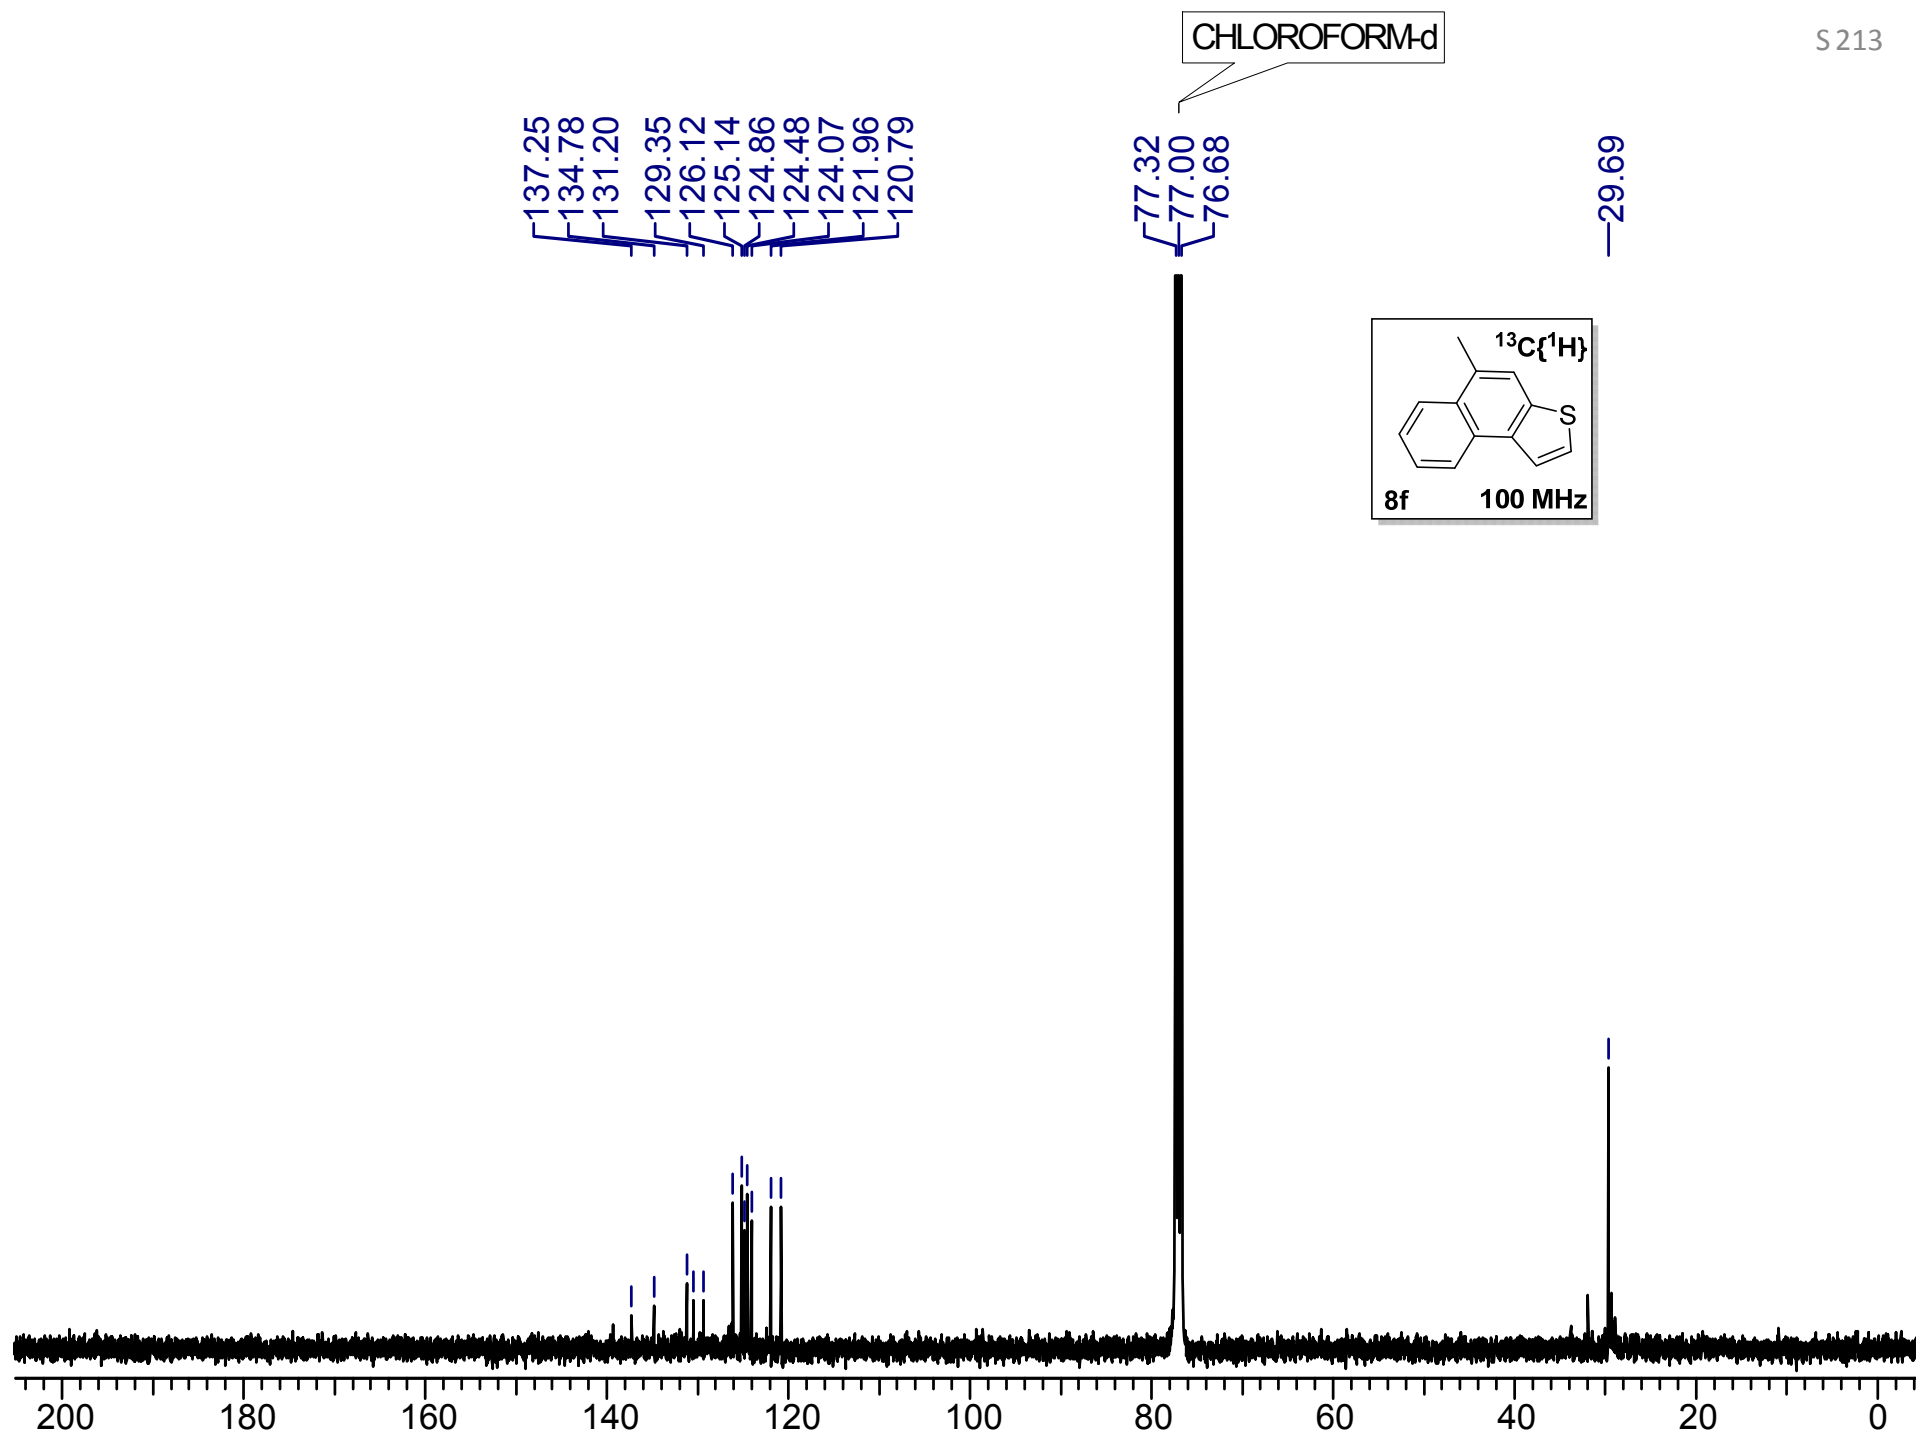

CHLOROFORM-d

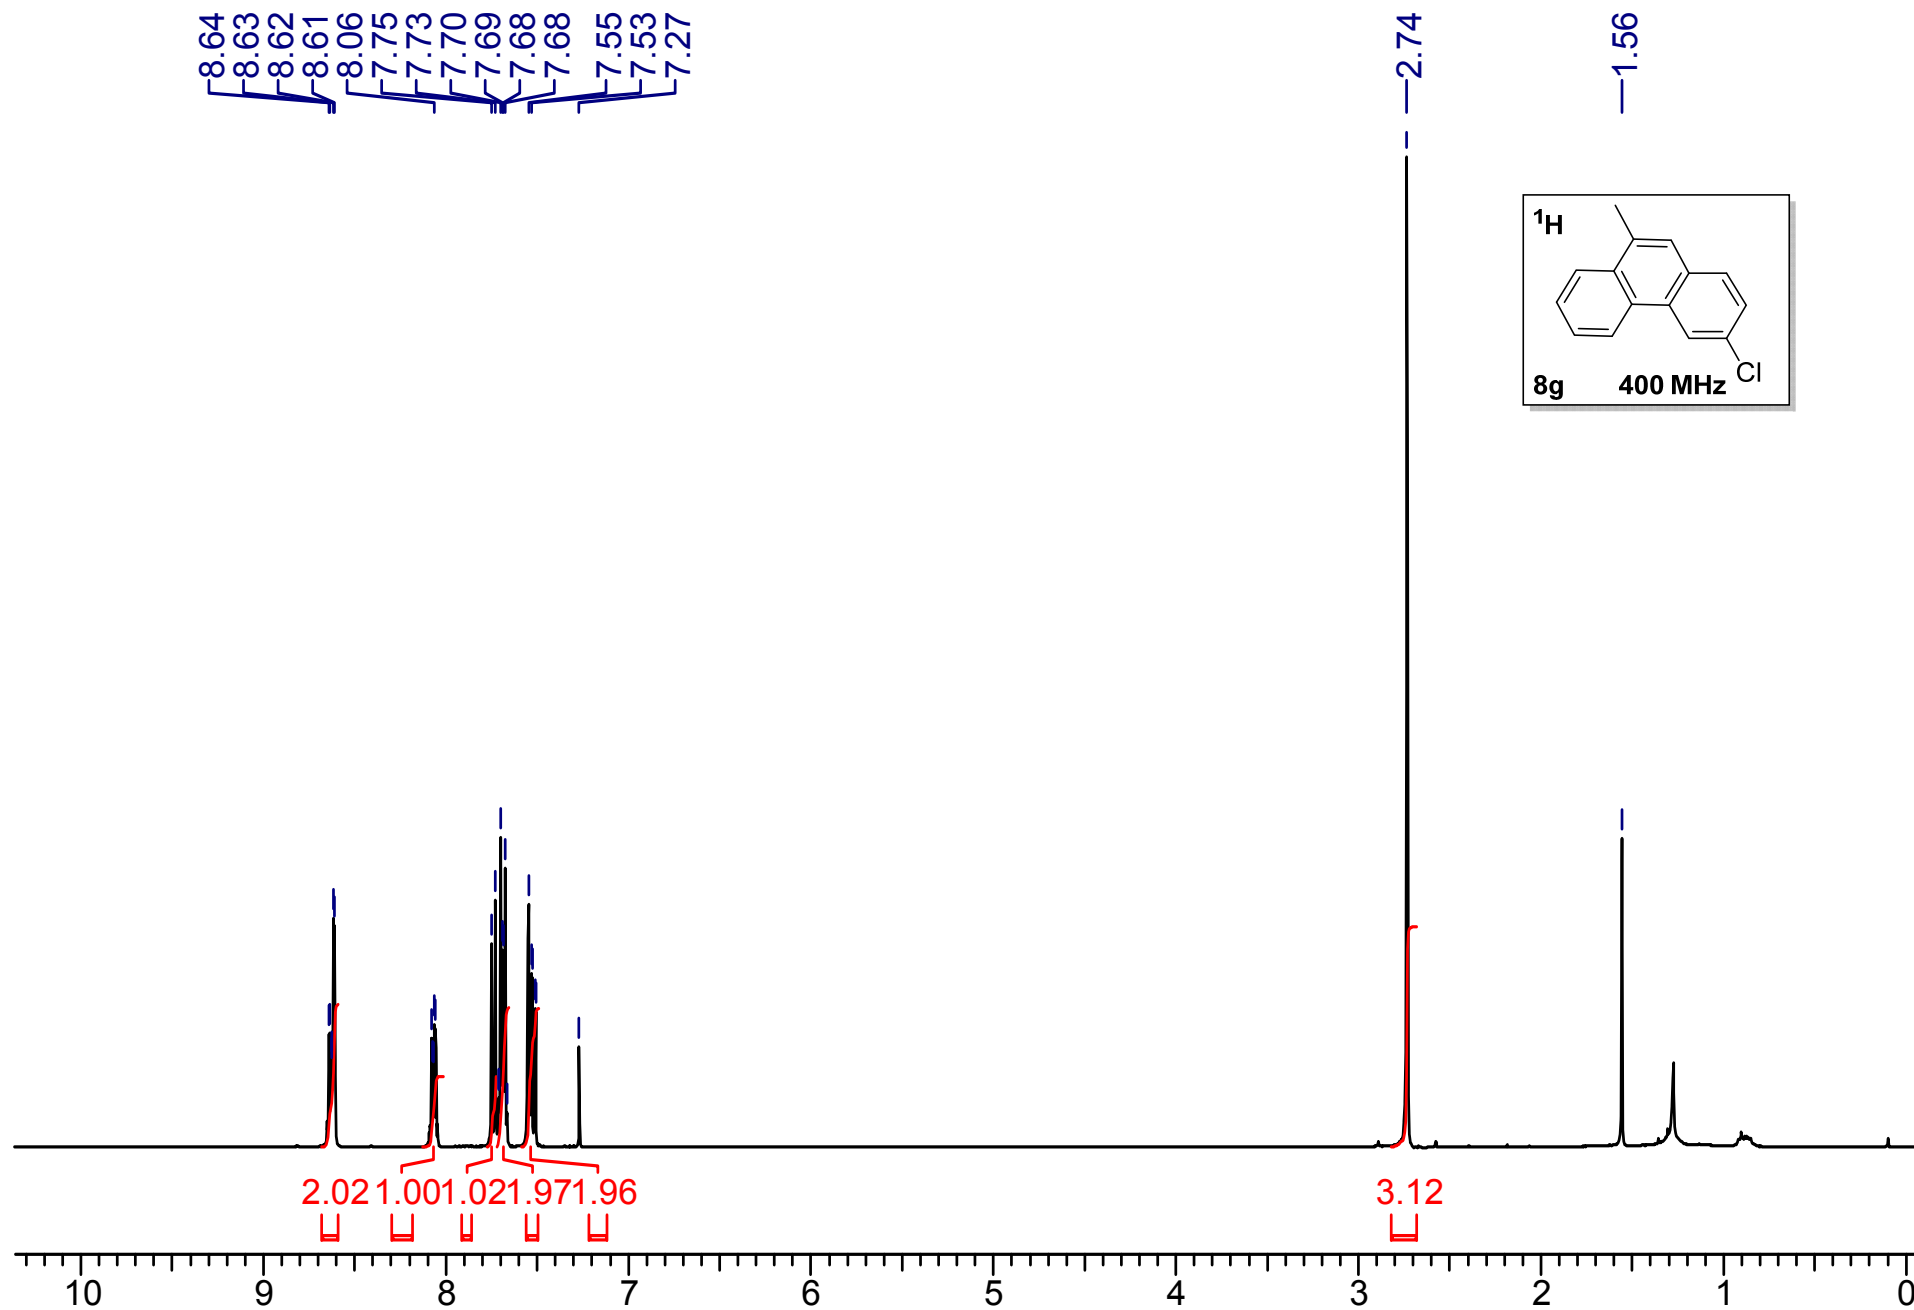

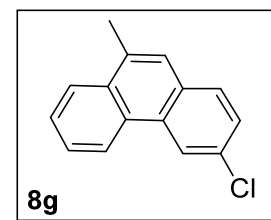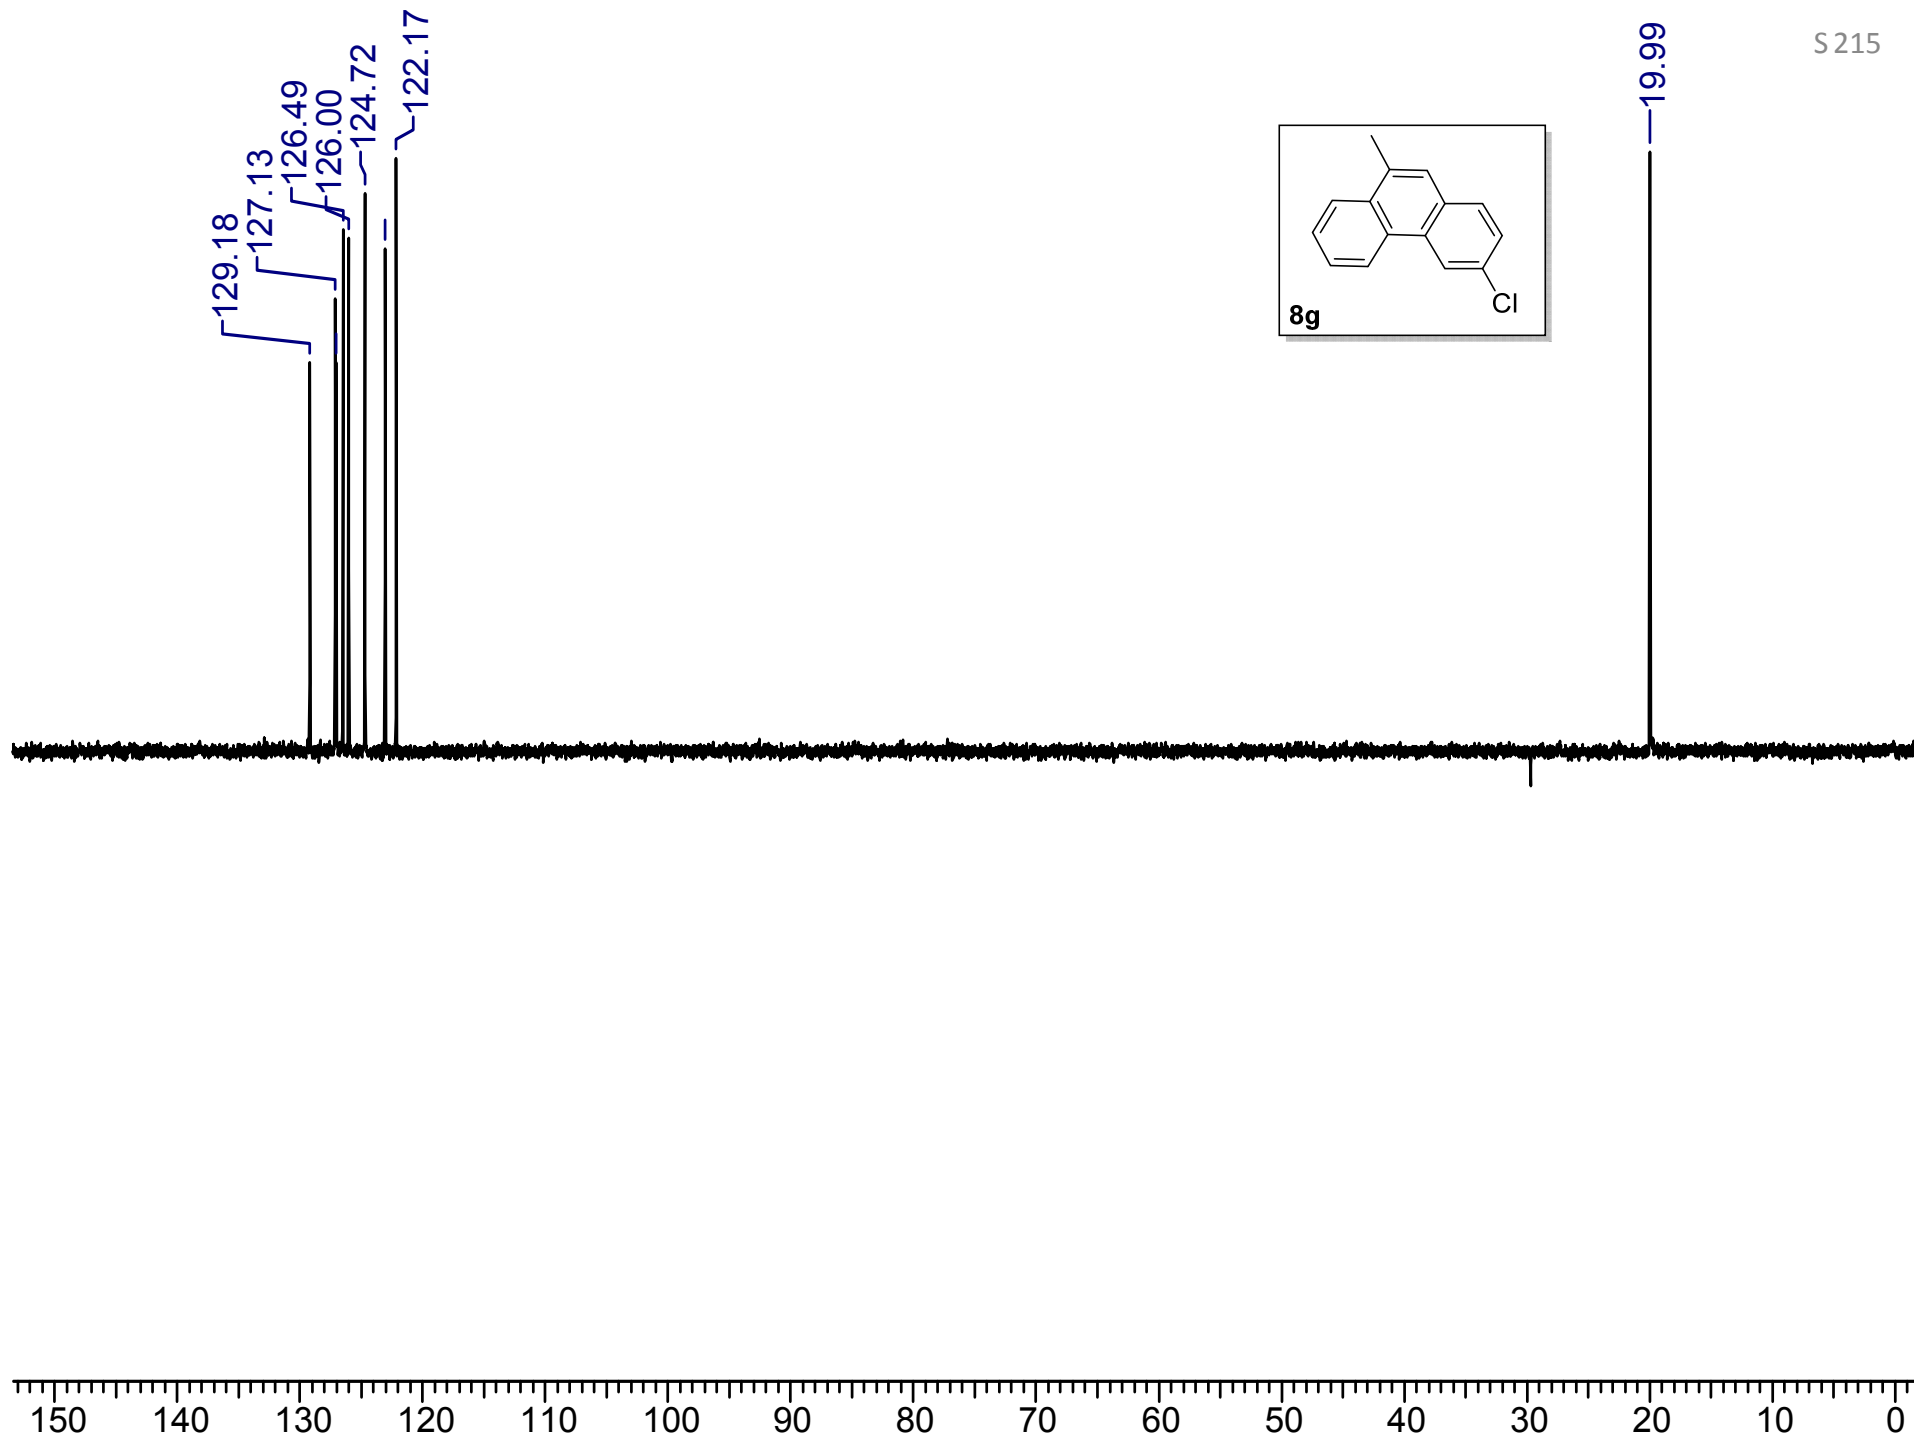

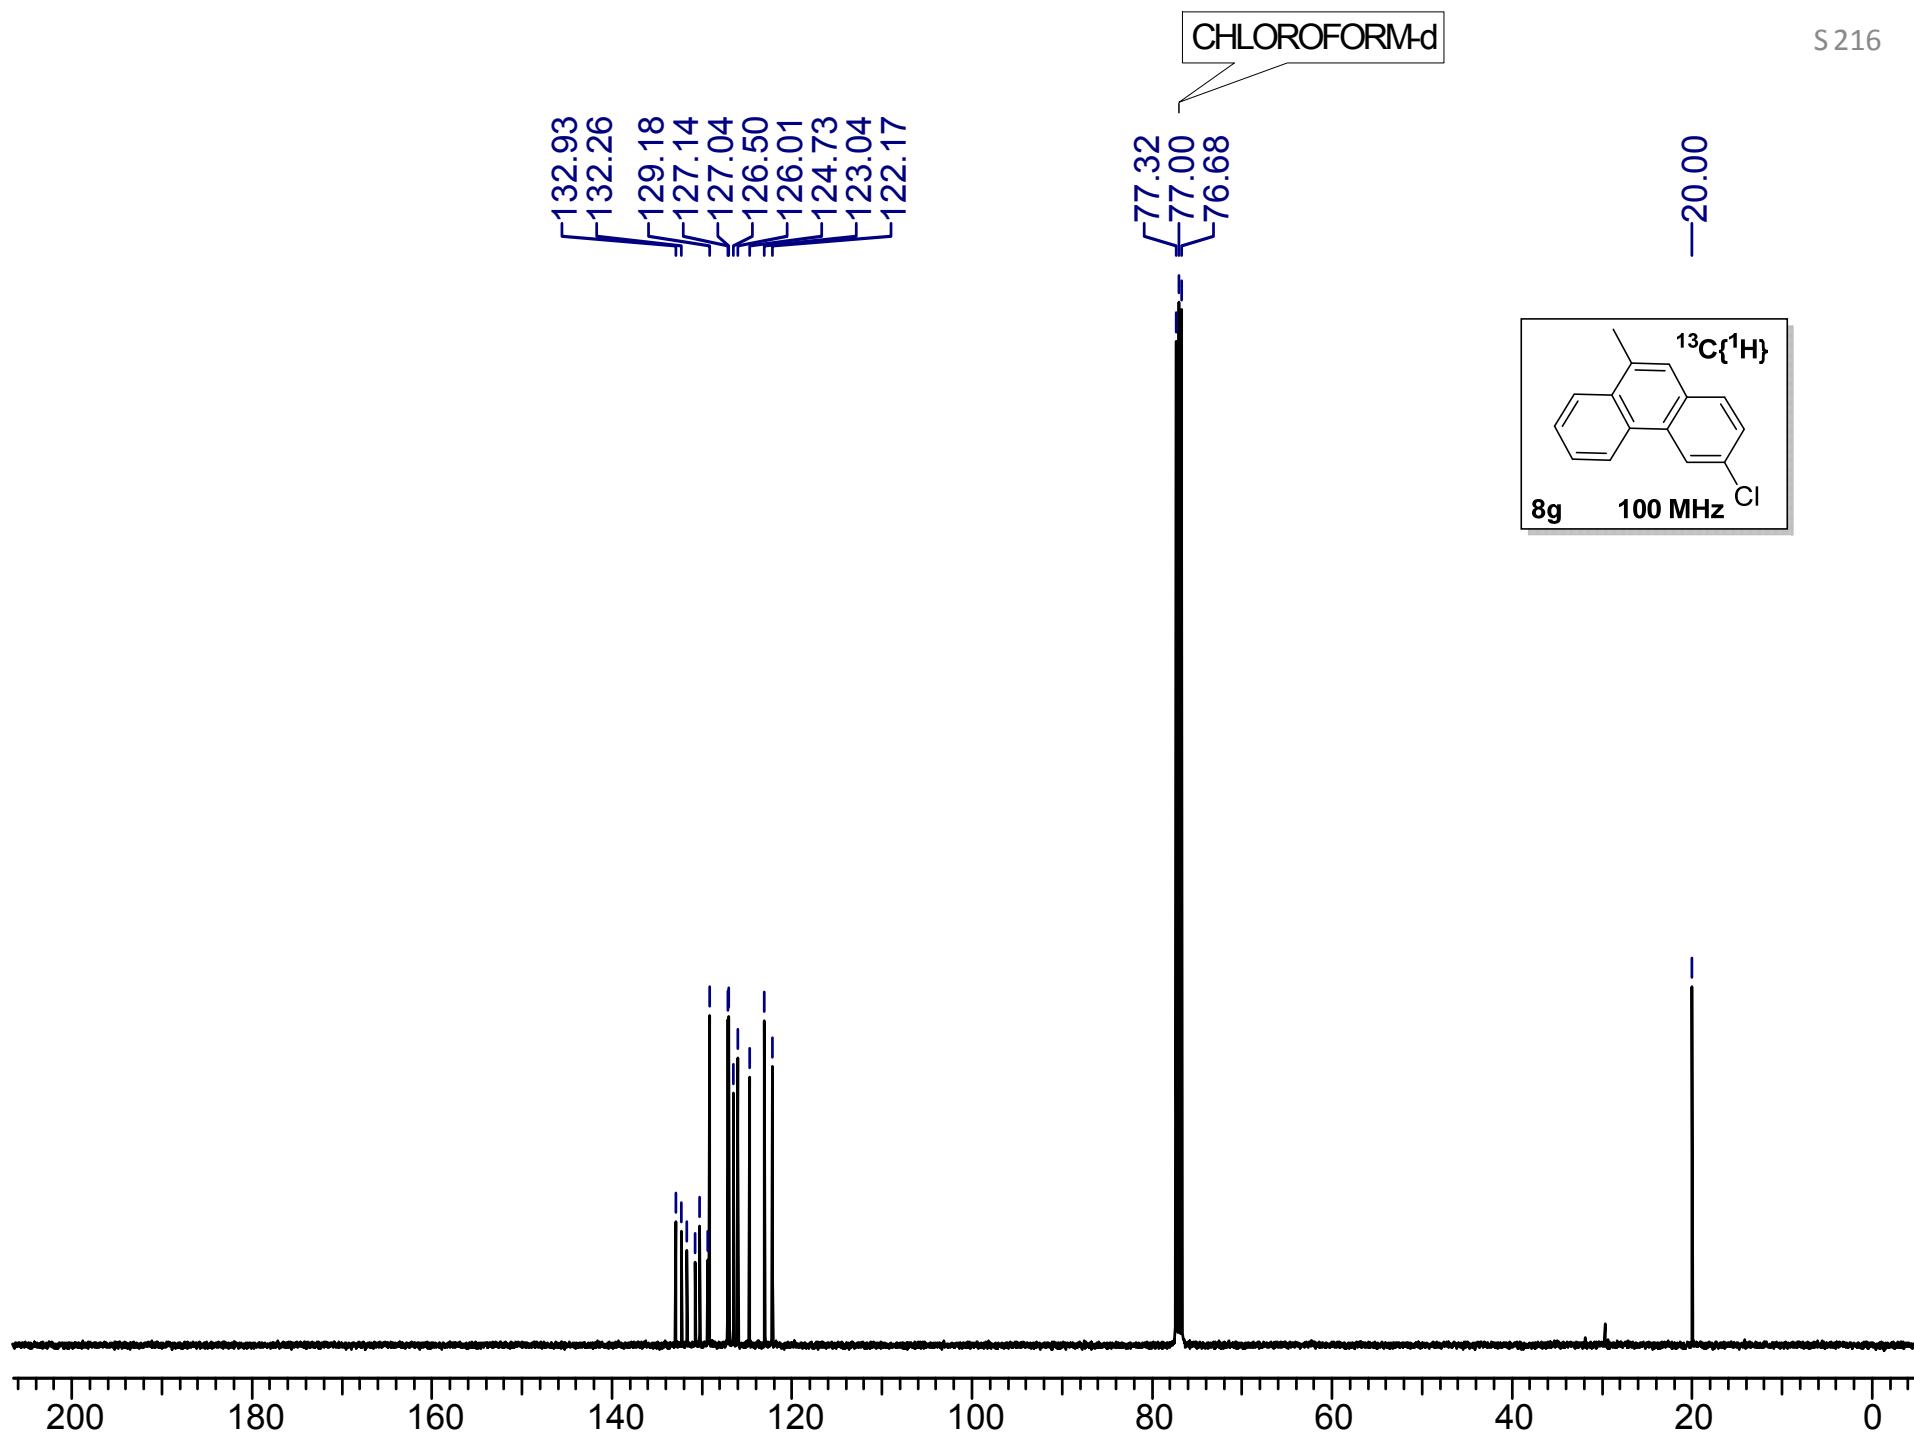



CHLOROFORM-d

S 217

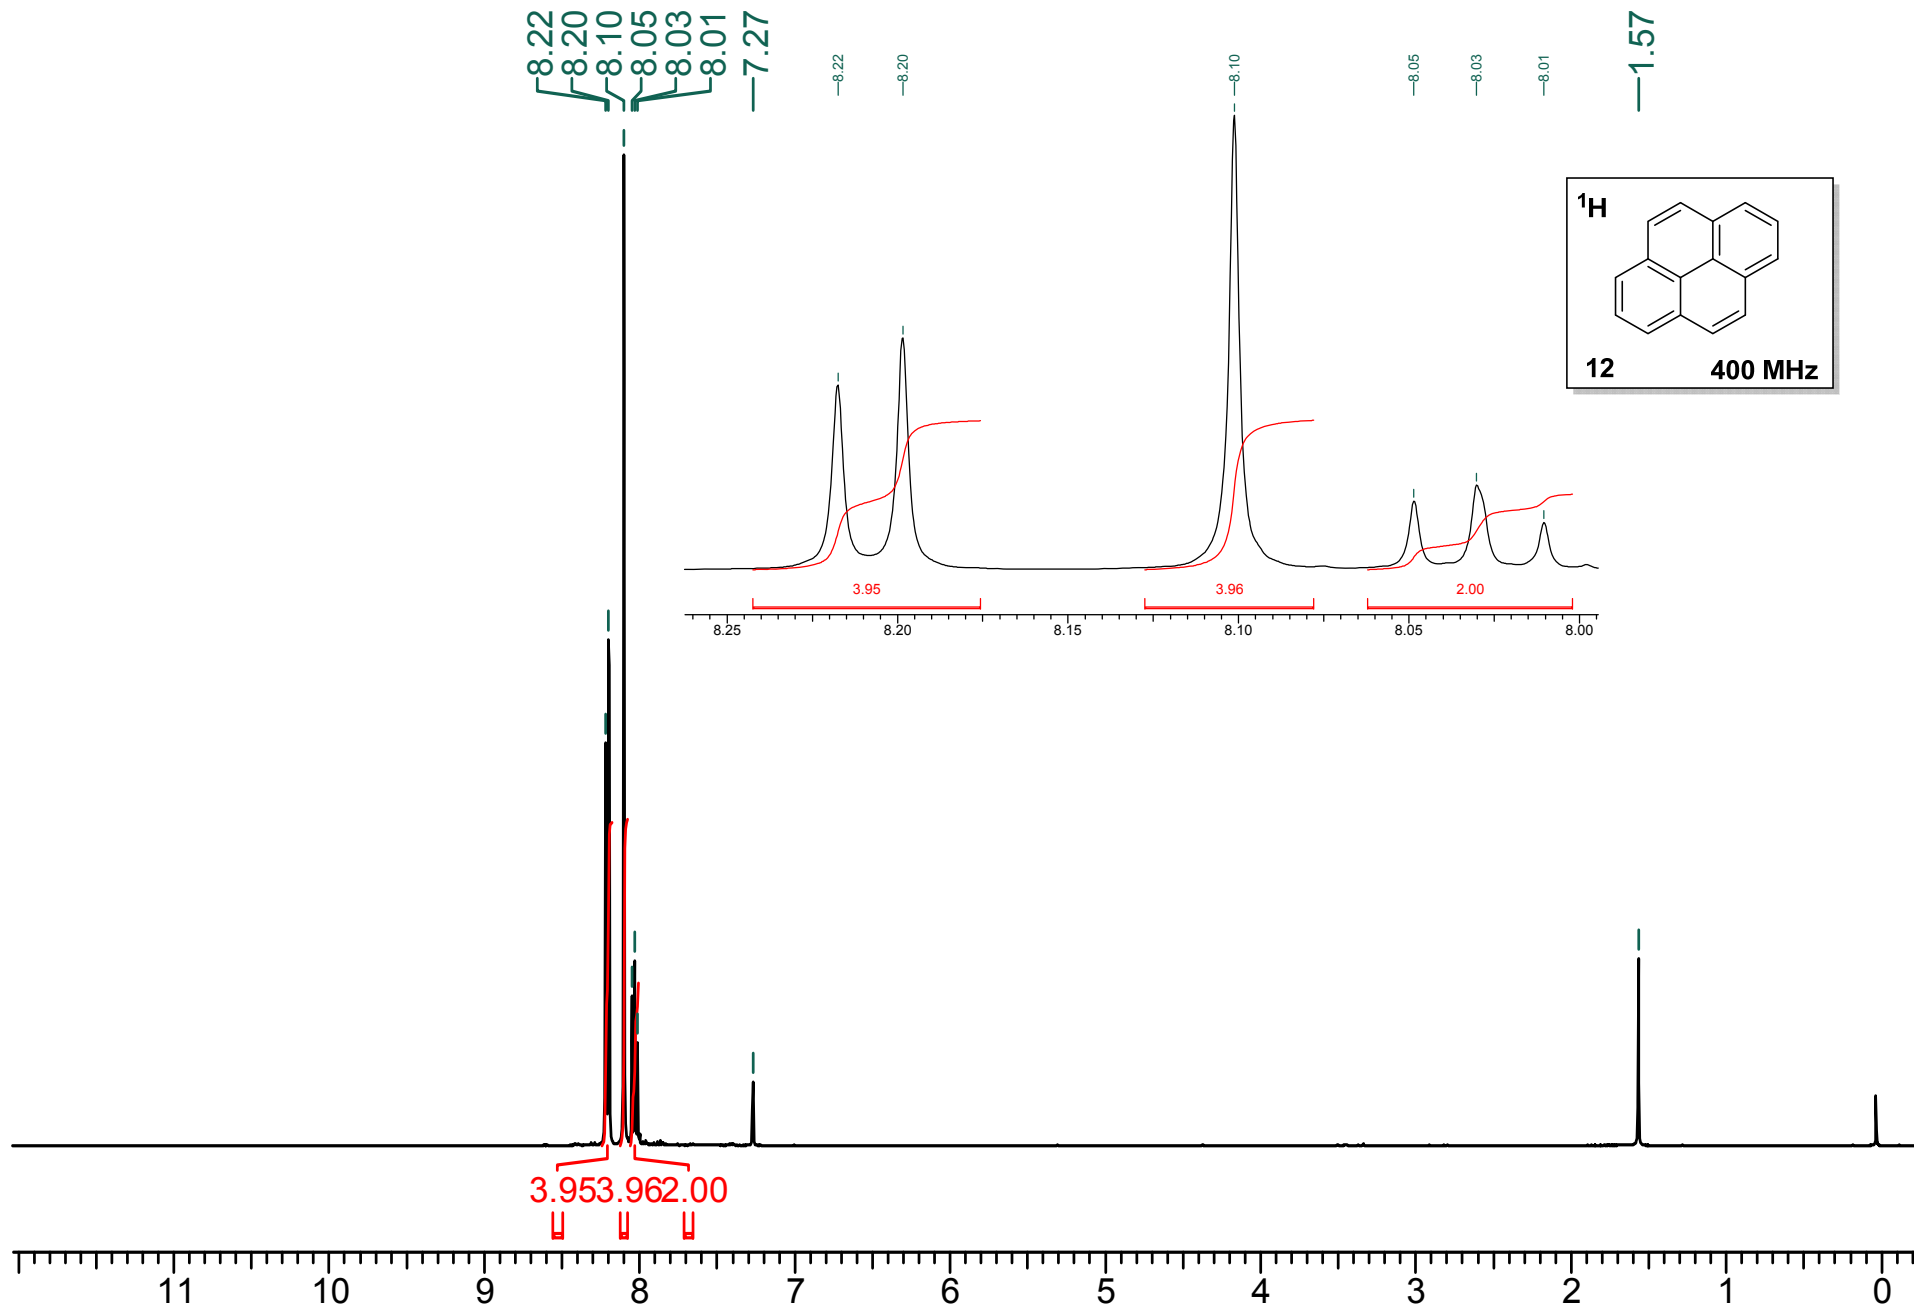

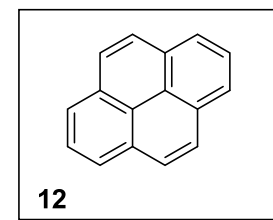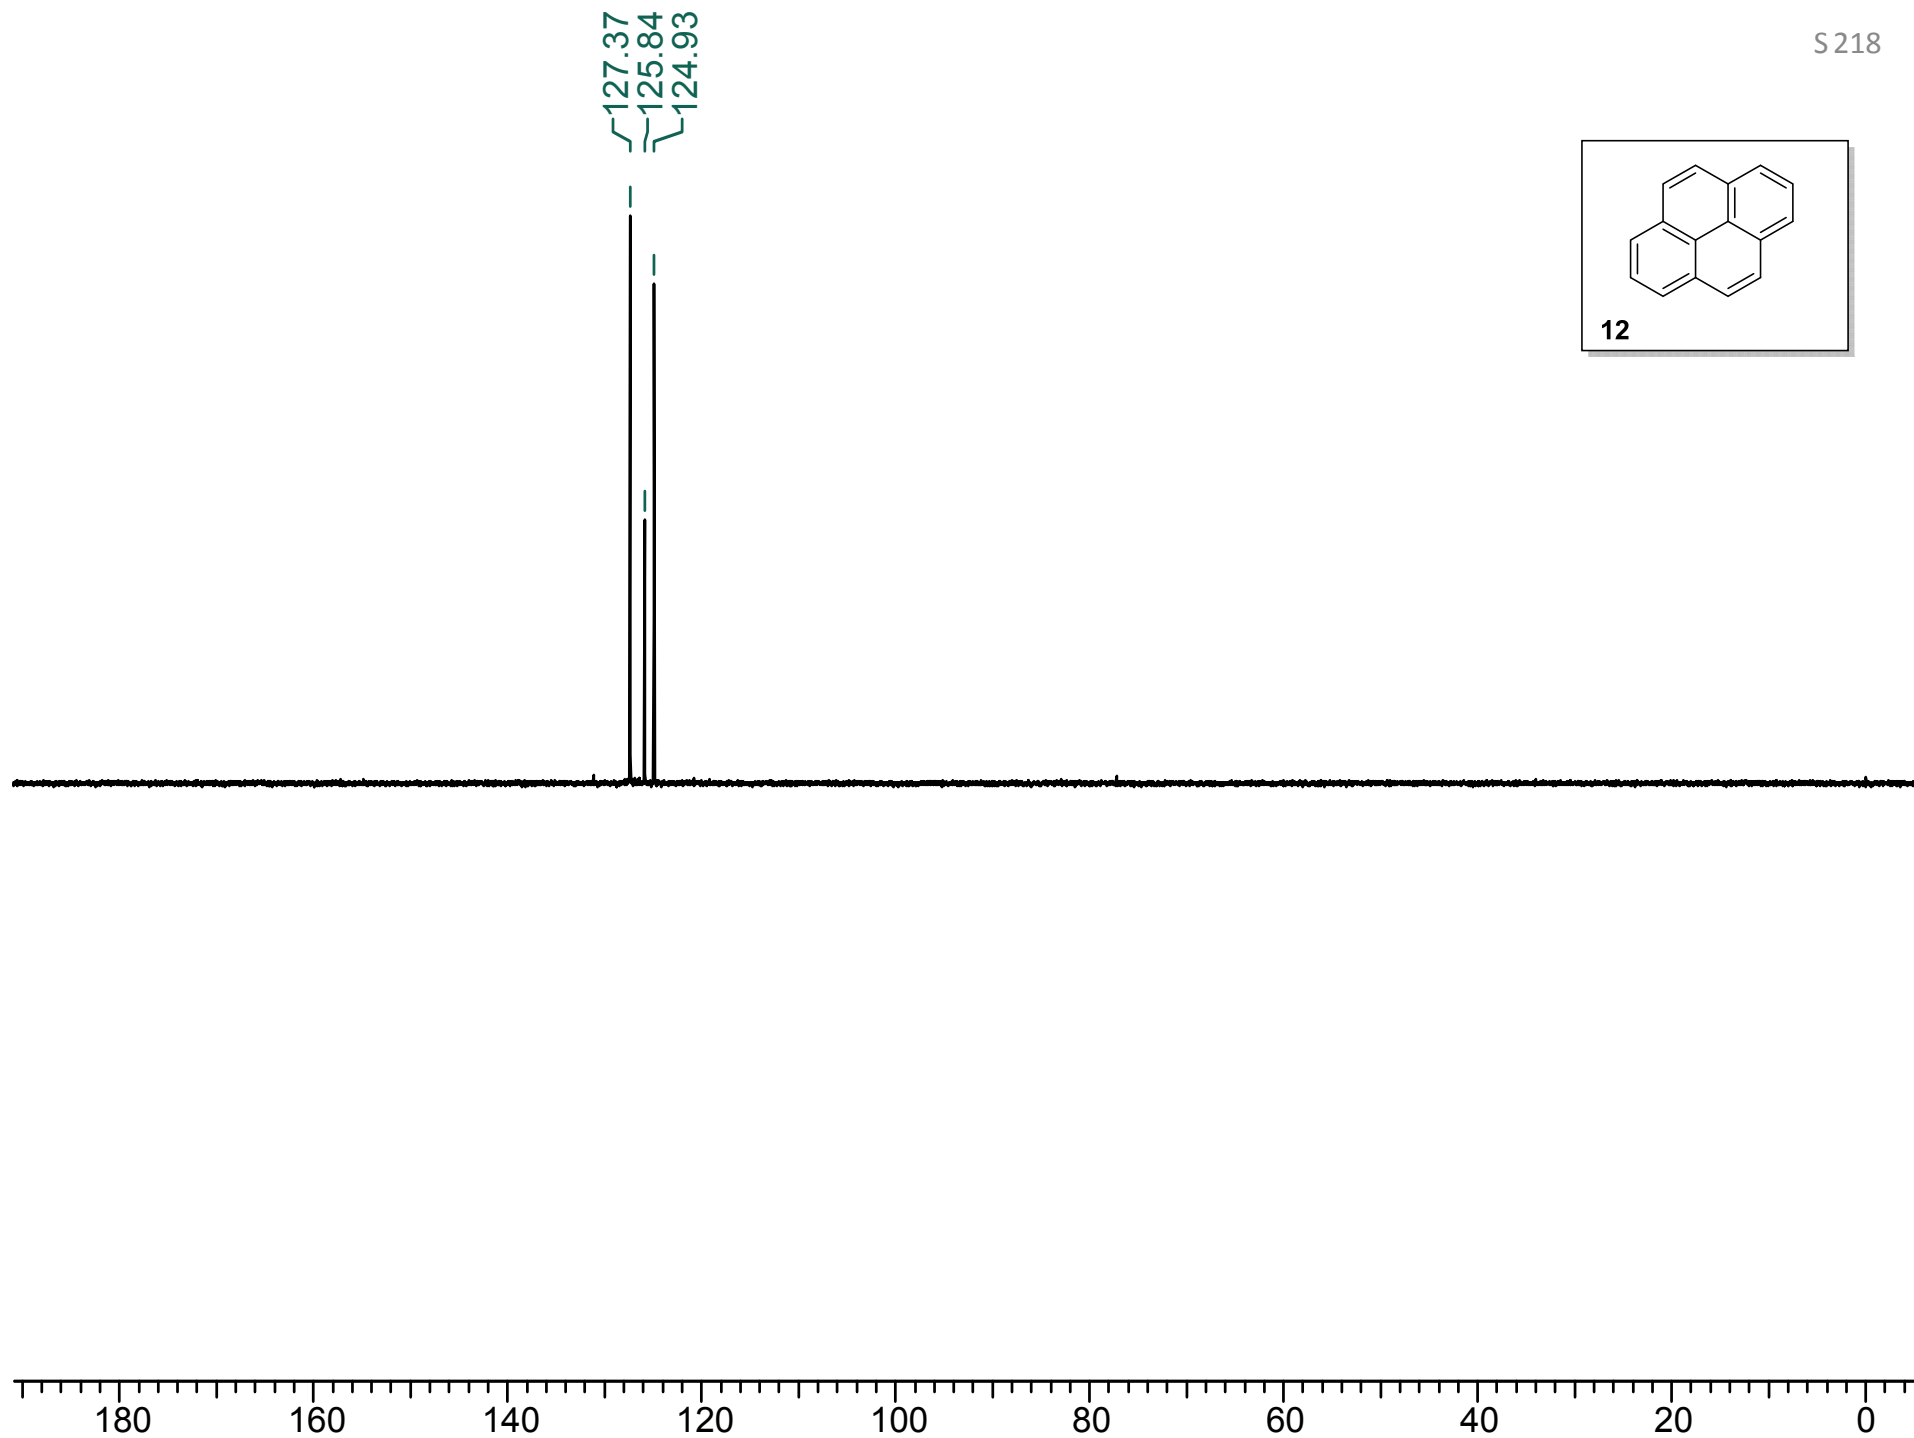

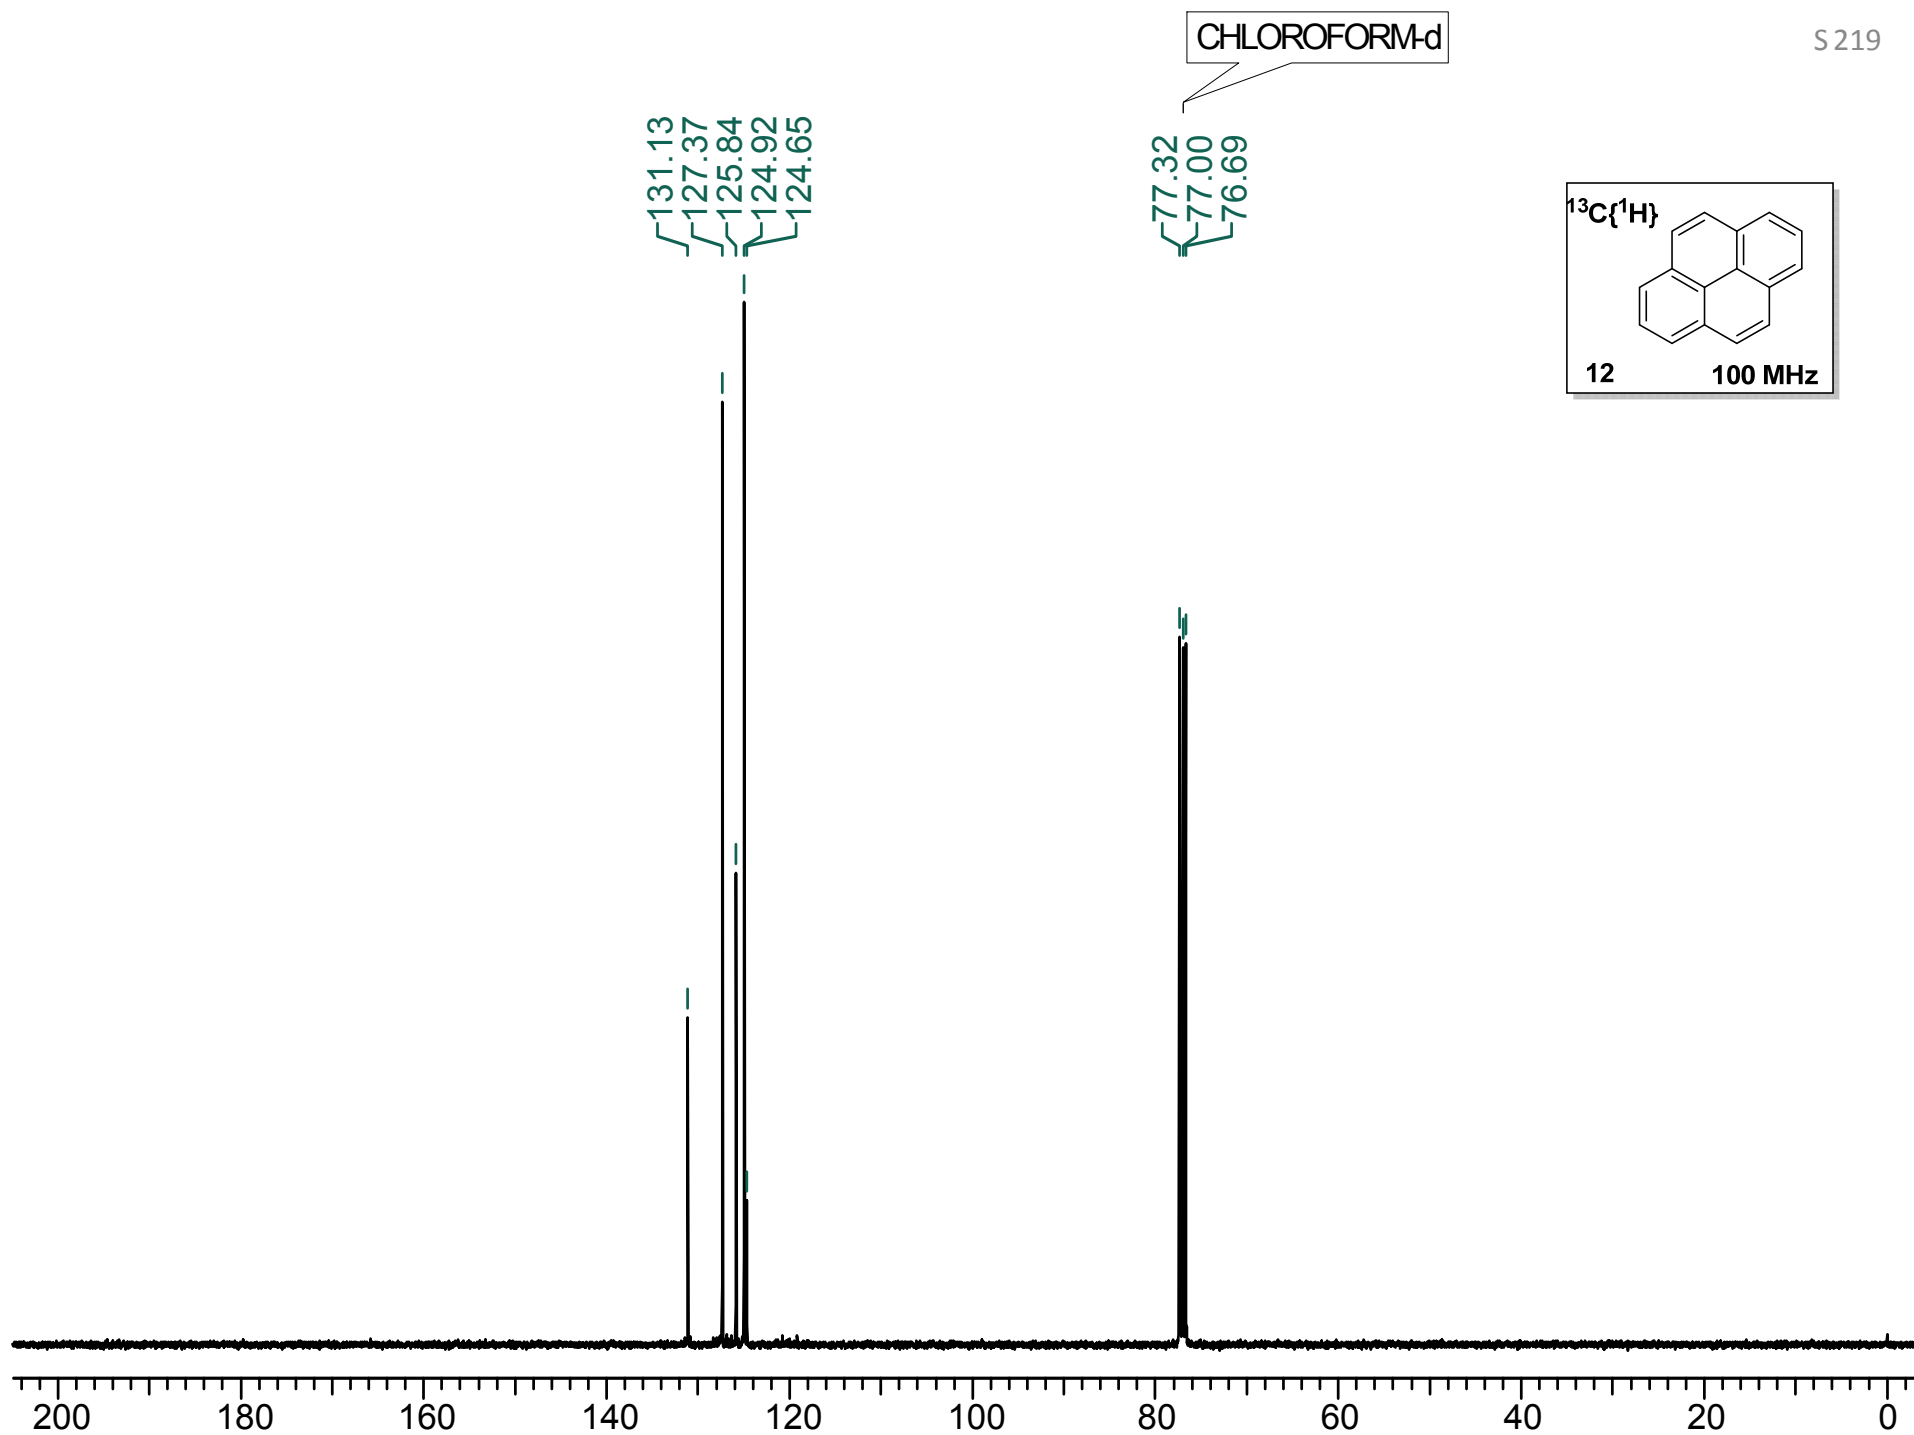

CHLOROFORM-d

9.21  
9.21  
9.19  
9.19  
8.33  
8.19  
8.18  
8.17  
8.15  
8.14  
8.12  
8.10  
8.03  
7.64  
7.62  
7.56  
7.27

0.12  
0.04

9.21  
9.21  
9.19

8.36  
8.34  
8.33  
8.28  
8.22  
8.20  
8.19  
8.18  
8.17  
8.15  
8.14  
8.12  
8.10  
8.05  
8.03  
8.01

7.66  
7.66  
7.64  
7.63  
7.62  
7.60  
7.59  
7.58

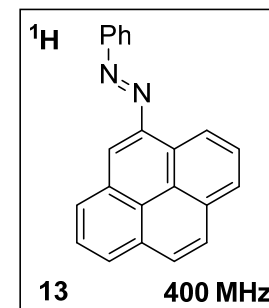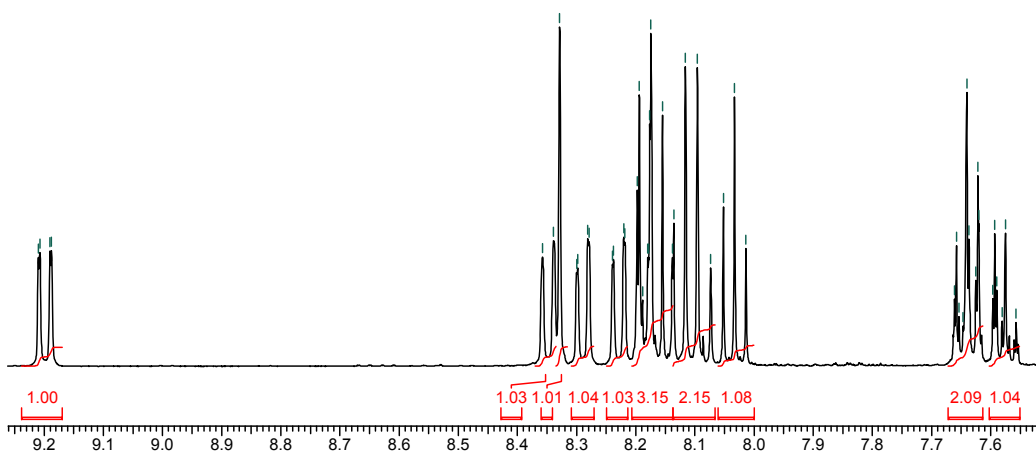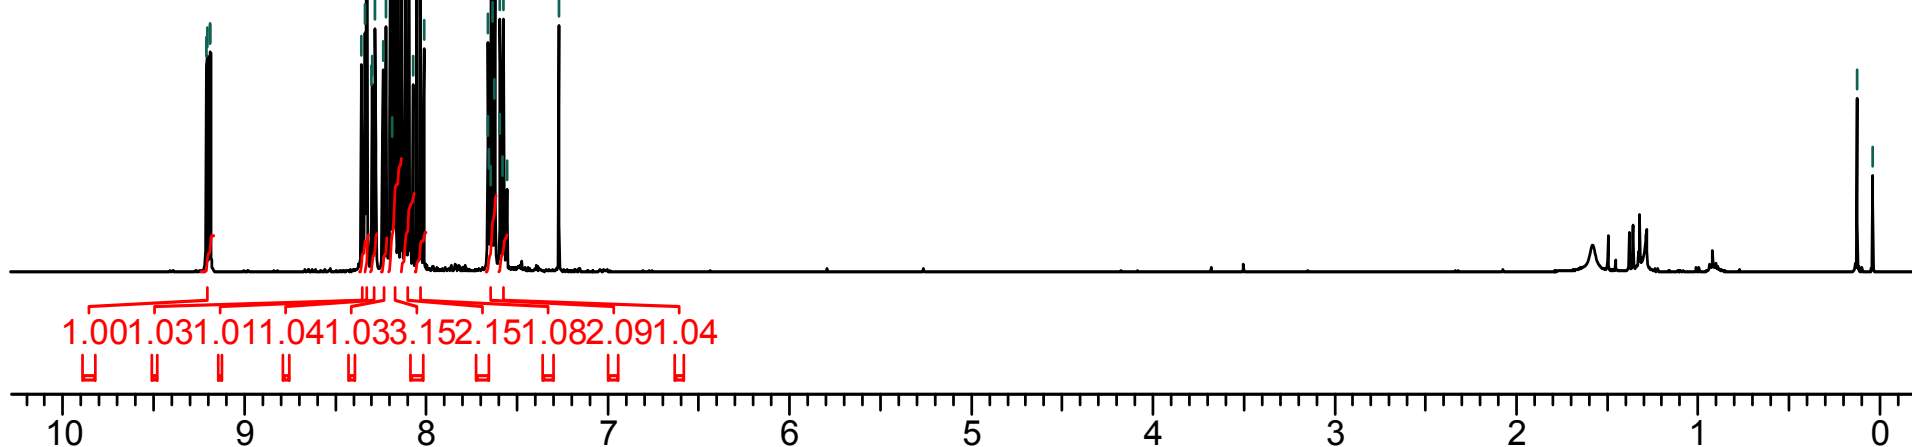

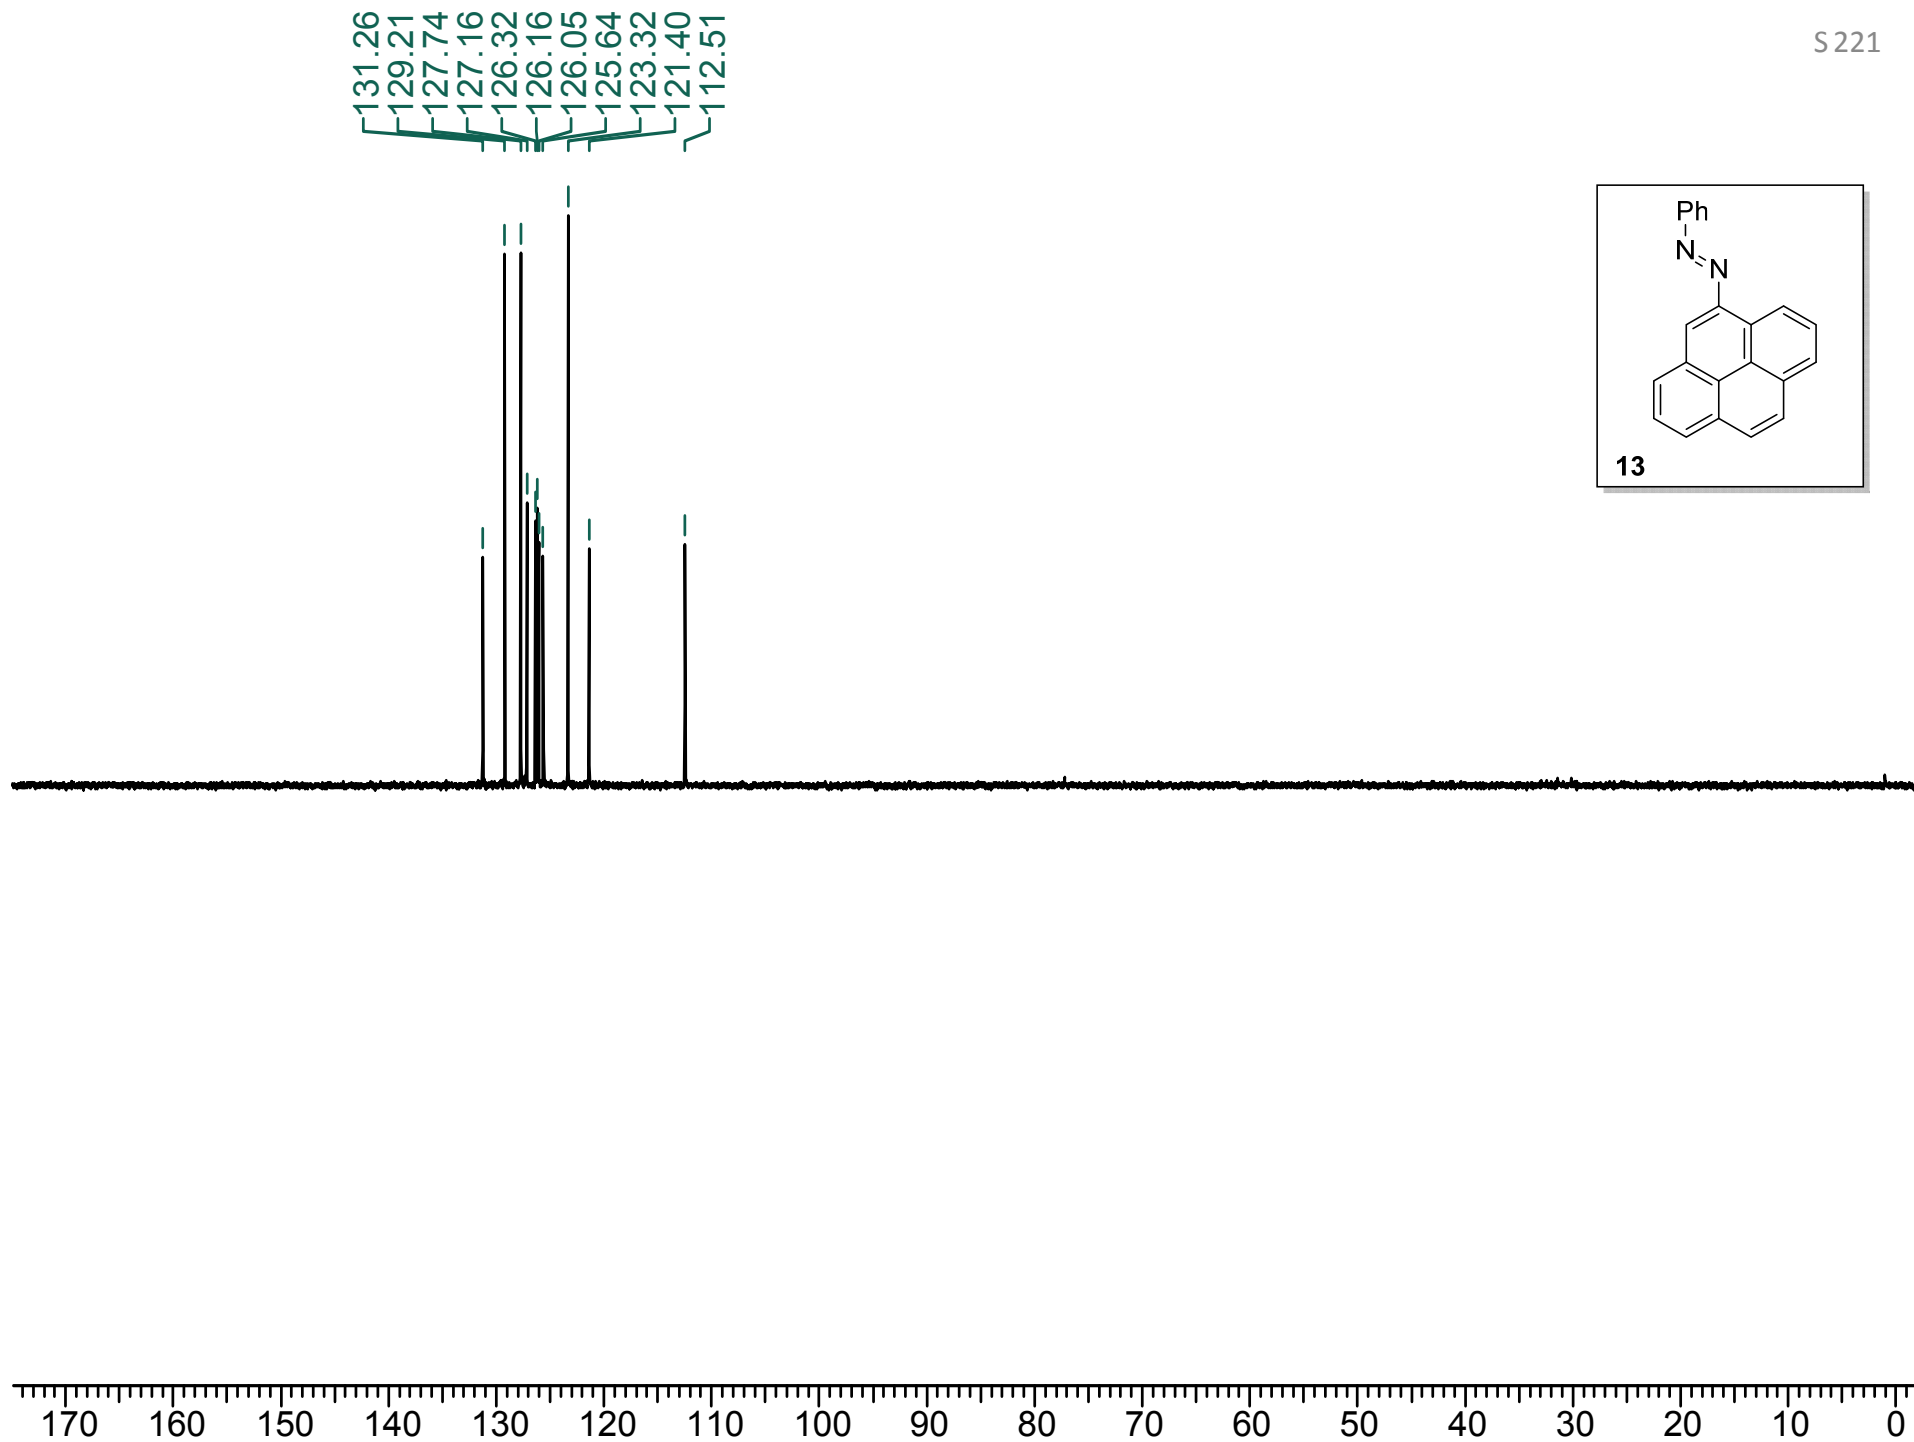

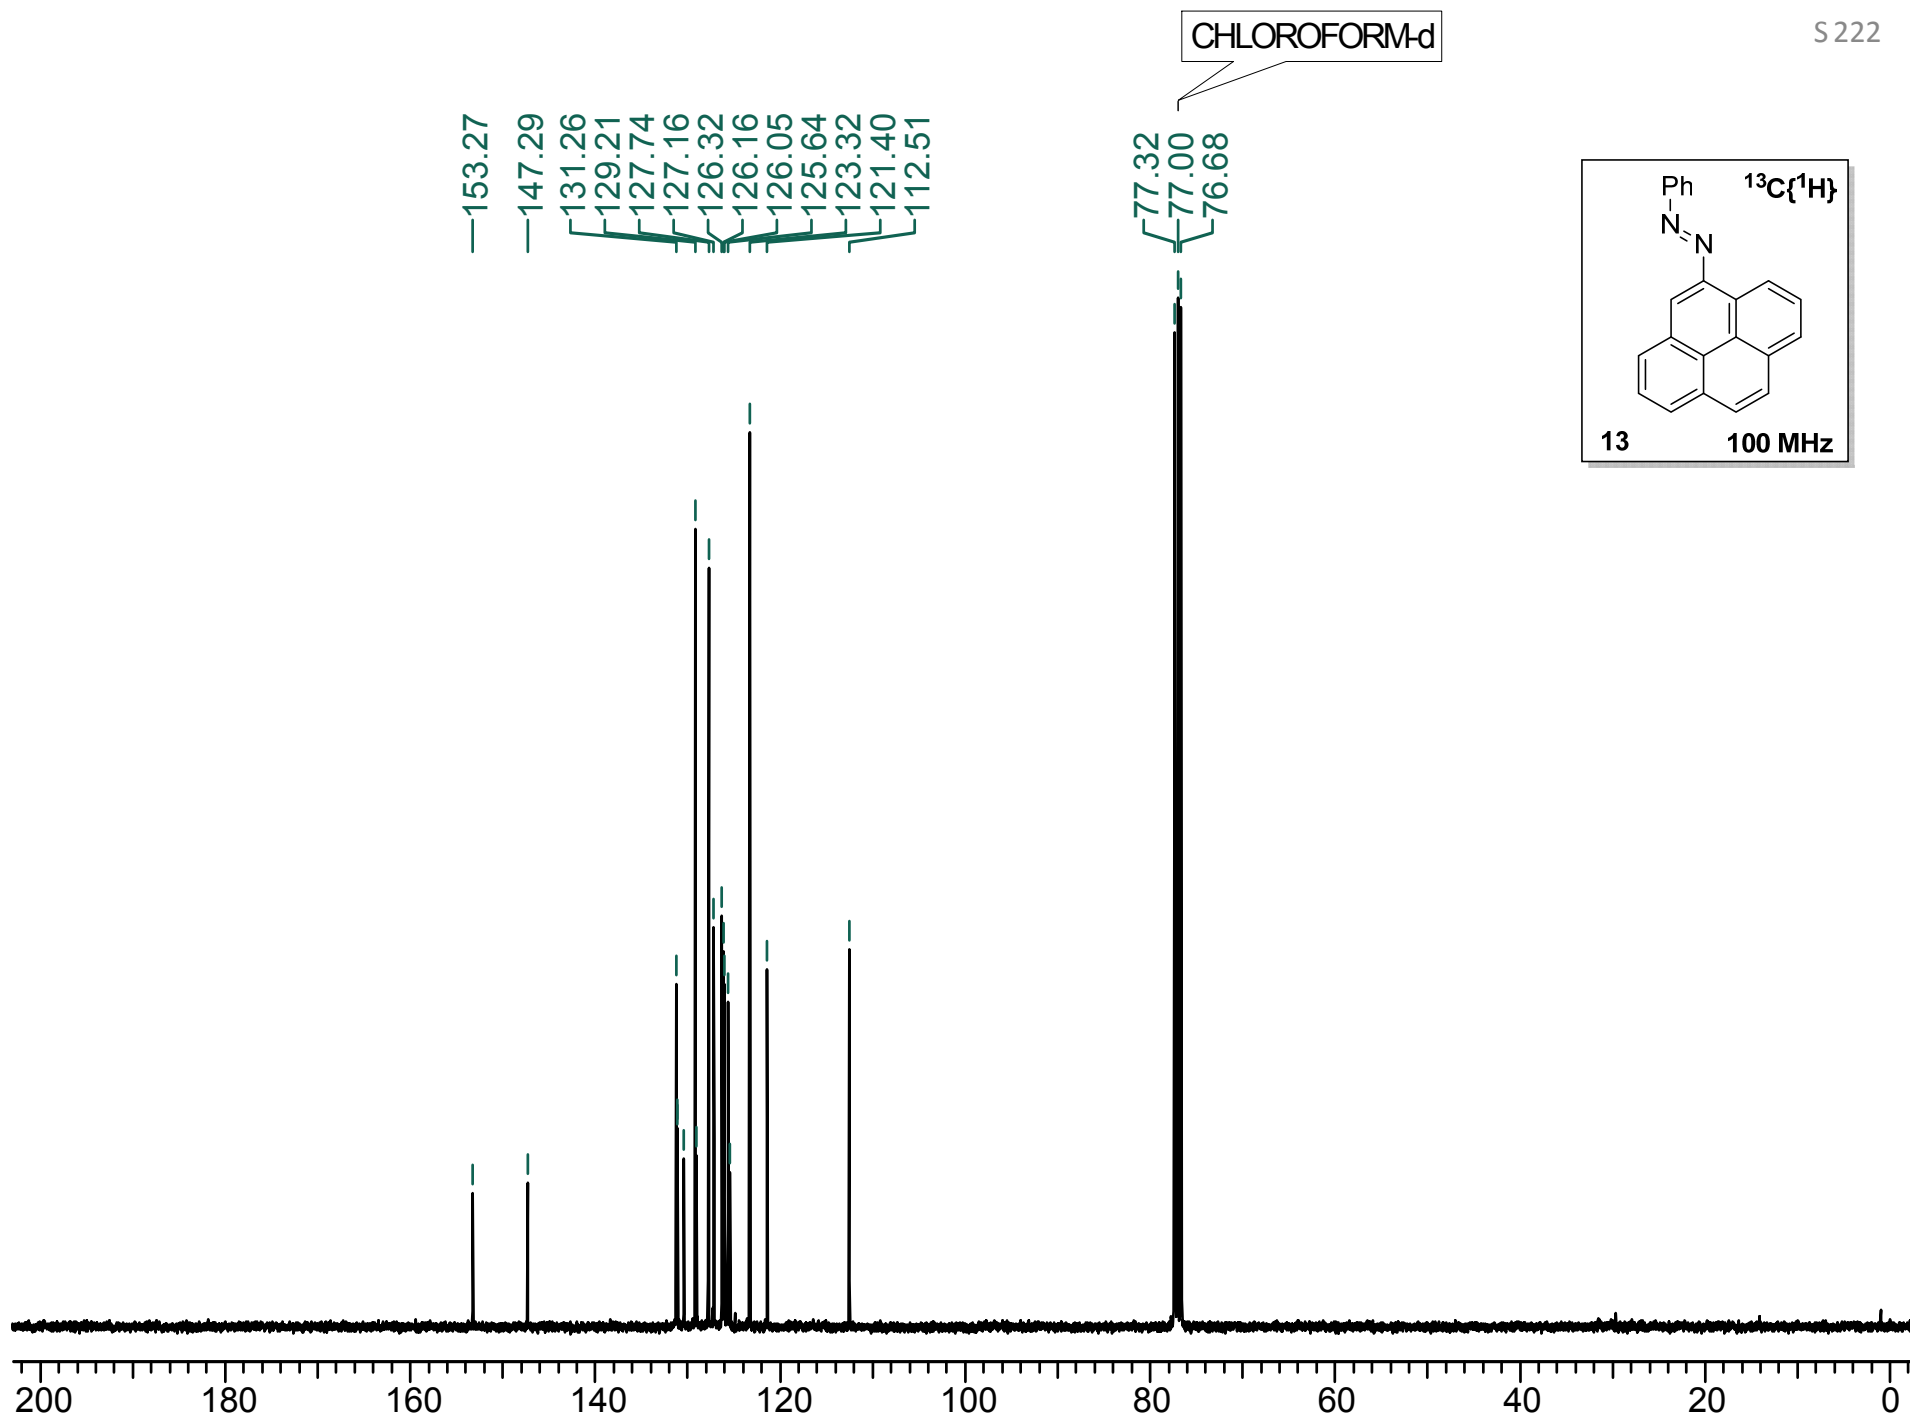

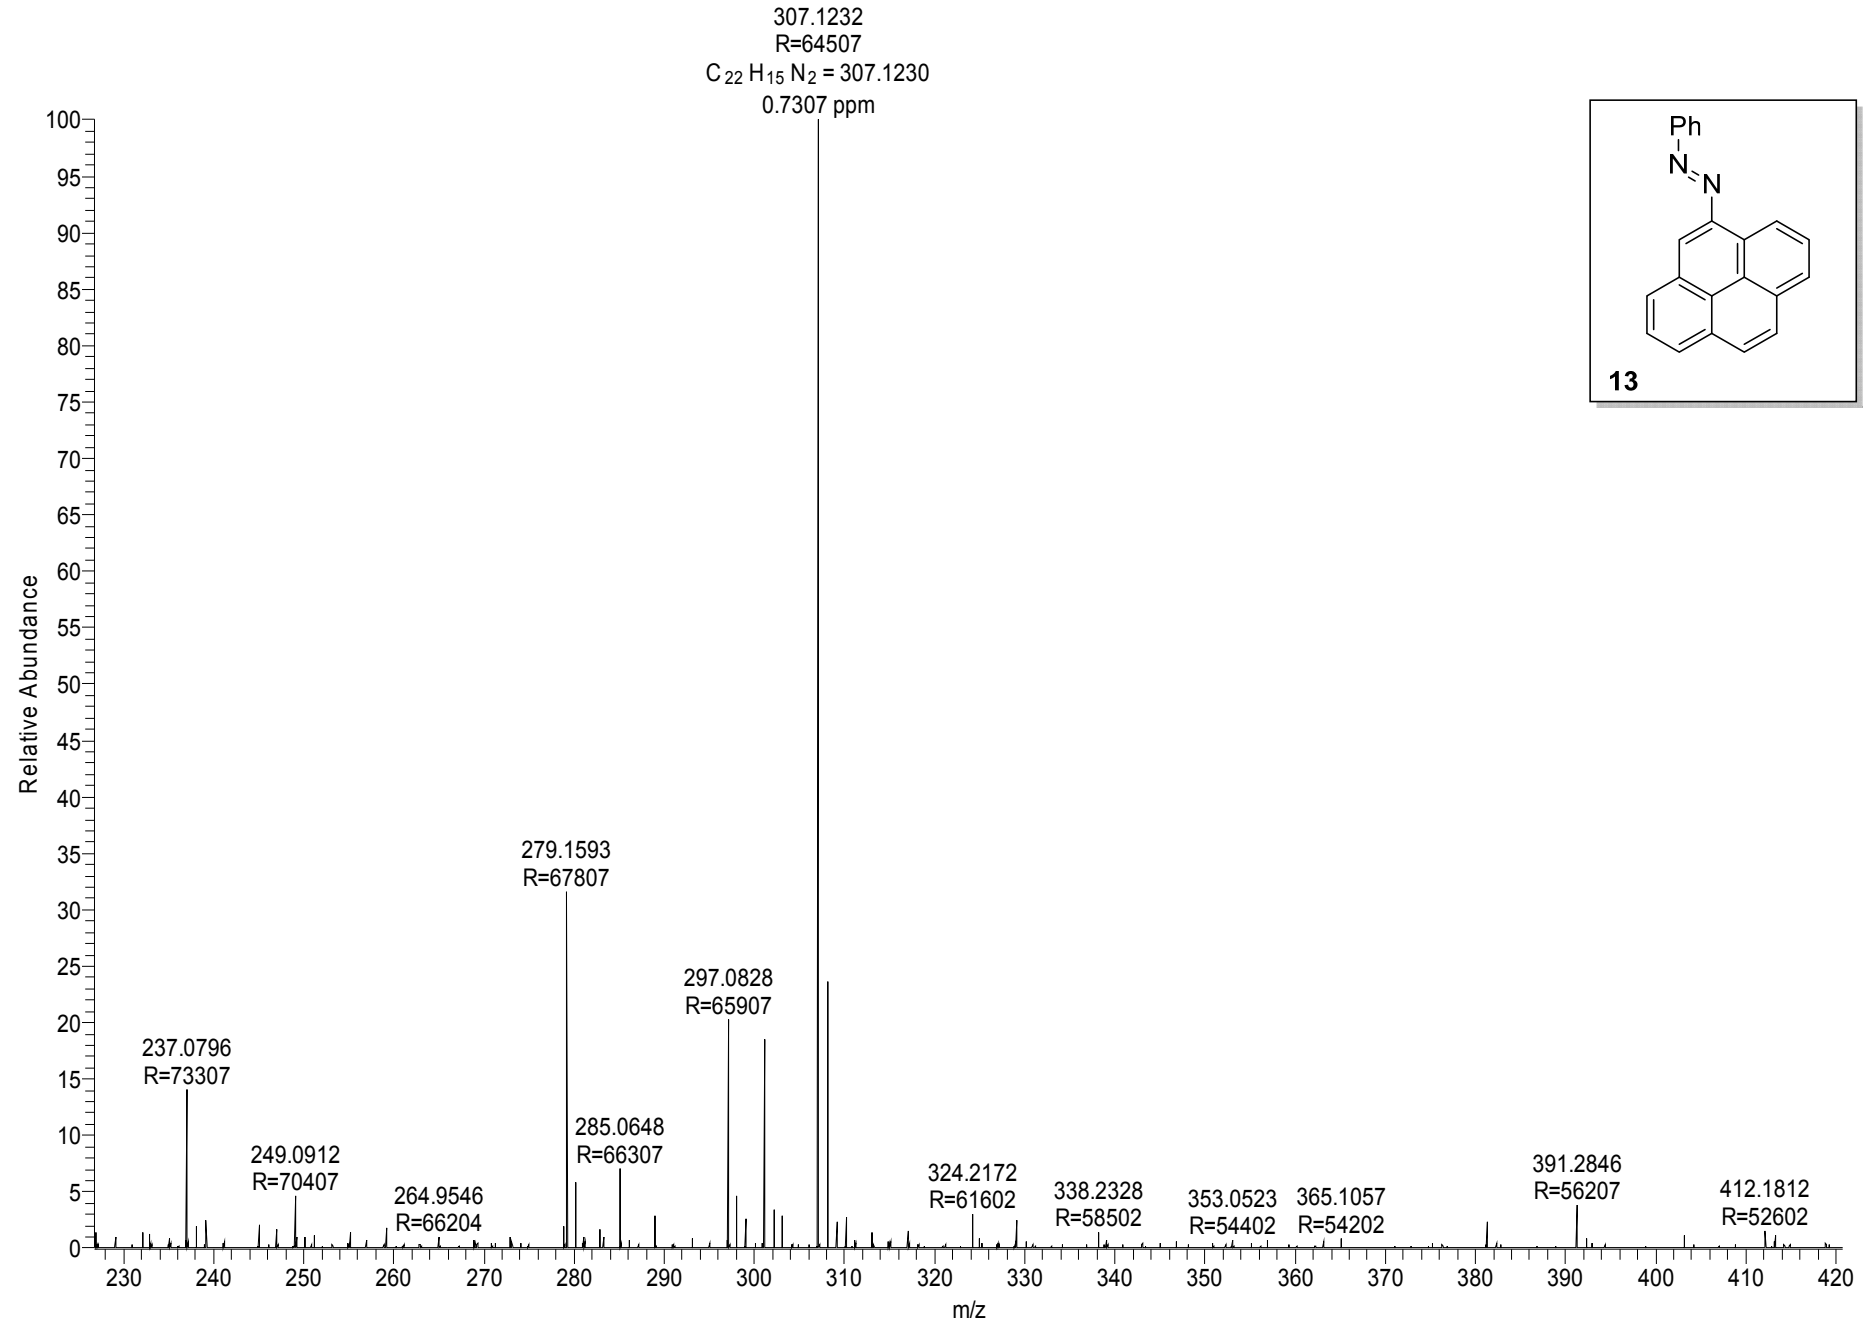

Supplement: d1ob02207e1.pdf [file d1ob02207e1.pdf]
